# Supplementary material for: Morphological and genomic shifts in mole-rat ‘queens’ increase fecundity but reduce skeletal integrity
Source: eLife. 2021 Apr 12;10:e65760. doi: 10.7554/eLife.65760 (PMC8104968; doi:10.7554/eLife.65760)
Supplement: Supplementary file 1. [file elife-65760-supp1.xlsx]

## Sheet: Table S1
Supplementary File 1. Summary of study animals.
Animal ID	Experimental status1	Natal colony	Natal litter reference2	Birthdate	Breeding status at sample collection	Experimental start date	Date of weight at experimenatal start	Weight in grams at experimental start	Sample collection date	Age in months at experimental start	Months of experimental duration	Sample collection date	Age in years at sample collection	Animal Reference3	Date of weight at sample collection	Weight in grams at sample collection	Days as breeder	Number litters born	Number offspring born	Lactating at time of sample collection	Total area at femoral midshaft	Cortical area at femoral midshaft	Marrow area at femoral midshaft	Minimum cortical thickness at femoral midshaft	Imin at femoral midshaft	J at femoral midshaft	LV5 length at experimental start	Date of x-ray at sample collection	LV5 length at sample collection
ARF002	experimental animal	AR	99	2015-02-28	helper	2017-10-30	2013-10-29	161	2018-10-03	32.5	11.2667	2018-10-03	3.6	1097	2018-10-01	179	0	0	0	0	4.9902	3.5472	1.378	0.447	1.2769	3.9073	5.467	2018-09-26	5.589
BEF001	non-experimental animal	BE	28	2014-04-06	helper	NA	NA	NA	2018-10-12	NA	NA	2018-10-12	4.52	634	2018-10-12	123	0	0	0	0	4.0296	3.1289	0.85	0.376	0.6855	2.9014	NA	NA	NA
CRF002	non-experimental animal	CR	9	2013-12-17	helper	NA	NA	NA	2017-12-13	NA	NA	2017-12-13	3.99	393	2017-12-12	173	0	0	0	0	3.7346	3.2535	0.445	0.552	0.7143	2.3908	NA	2017-12-06	5.634
CRF007	experimental animal	CR	84	2015-01-06	queen	2016-06-08	2012-06-07	89	2017-12-14	17.3	18.4667	2017-12-14	2.94	1015	2017-12-13	112	554	4	14	1	3.5709	1.9751	1.528	0.233	0.569	1.6959	4.369	2017-12-07	5.275
DVF007	experimental animal	DV	165	2016-01-03	queen	2017-10-31	2013-10-31	131	2018-10-05	22.2333	11.3	2018-10-05	2.76	1333	2018-10-05	166	339	1	3	0	4.0215	3.1232	0.848	0.371	0.6822	2.8902	NA	2018-09-28	5.751
DVF008	experimental animal	DV	165	2016-01-03	helper	2017-10-31	2013-10-31	122	2018-10-04	22.2333	11.2667	2018-10-04	2.75	1334	2018-10-03	167	0	0	0	0	3.5617	3.0717	0.454	0.451	0.5798	2.322	5.335	2018-09-27	5.782
G1F022	experimental animal	G1	77	2014-12-02	helper	2016-01-21	2012-01-20	134	2017-12-10	13.8333	22.9667	2017-12-10	3.02	946	2017-12-09	151	0	0	0	0	3.8838	3.1373	0.702	0.435	0.7512	2.5656	4.88	2017-12-03	5.276
G1F025	experimental animal	G1	77	2014-12-02	solitaire	2016-01-21	2012-01-20	173	2017-12-11	13.8333	23	2017-12-11	3.03	949	2017-12-10	201	0	0	0	0	6.2923	3.9955	2.22	0.288	1.9318	5.806	5.442	2017-12-04	5.755
G4F019	experimental animal	G4	47	2014-07-24	helper	2016-02-04	2012-02-03	128	2017-12-07	18.6667	22.4	2017-12-07	3.38	798	2017-12-05	148	0	0	0	0	3.0101	1.9628	0.993	0.289	0.3682	1.4678	5.176	2017-11-29	5.537
G4F020	experimental animal	G4	47	2014-07-24	solitaire	2016-02-04	2012-02-03	97	2017-12-07	18.6667	22.4	2017-12-07	3.38	801	2017-11-30	128	0	0	0	0	3.0681	2.1564	0.86	0.353	0.4276	1.525	4.771	2017-11-30	5.415
G10F023	experimental animal	G10	3	2013-11-07	helper	2015-12-18	2011-12-17	116	2017-10-19	25.7	22.3667	2017-10-19	3.95	289	2017-10-13	109	0	0	0	1	3.5869	2.657	0.879	0.281	0.5605	2.2298	5.405	2017-10-12	5.526
G10F024	experimental animal	G10	3	2013-11-07	queen	2015-12-18	2011-12-17	130	2017-10-20	25.7	22.4	2017-10-20	3.95	291	2017-10-19	140	672	1	1	1	4.9042	3.0525	1.78	0.257	1.0554	3.7114	5.375	2017-10-13	6.001
G10F025	experimental animal	G10	3	2013-11-07	solitaire	2015-12-18	2011-12-17	137	2017-10-21	25.7	22.4333	2017-10-21	3.96	292	2017-10-20	172	0	0	0	0	5.7868	3.7409	1.971	0.294	1.5724	5.1537	5.29	2017-10-14	5.838
G10F026	non-experimental animal	G10	27	2014-04-03	queen	NA	NA	NA	2017-11-24	NA	NA	2017-11-24	3.65	630	2017-11-23	142	159	1	2	1	4.2089	2.772	1.375	0.195	0.8915	2.5084	NA	2017-11-13	5.702
GRF001	experimental animal	GR	46	2014-07-23	queen	2016-02-24	2012-02-15	121	2017-11-30	19.3667	21.5	2017-11-30	3.36	795	2017-11-29	130	645	4	9	0	3.7114	2.4802	1.17	0.293	0.5879	2.1807	5.335	2017-11-23	5.878
GRF002	experimental animal	GR	46	2014-07-23	solitaire	2016-02-16	2012-02-15	99	2017-12-01	19.1	21.8	2017-12-01	3.36	796	2017-11-29	122	0	0	0	0	4.0099	3.3575	0.61	0.42	0.7338	2.8783	5.369	NA	NA
GRF003	experimental animal	GR	80	2014-12-23	helper	2016-03-05	2012-03-03	86	2017-10-16	14.6	19.6667	2017-10-16	2.82	991	2017-10-09	118	0	0	0	0	3.2588	2.7363	0.485	0.347	0.4825	1.9069	4.431	2017-10-09	5.137
GRF004	experimental animal	GR	80	2014-12-23	queen	2016-03-05	2012-03-03	114	2017-10-15	14.6	19.6333	2017-10-15	2.81	992	2017-10-14	120	589	2	2	0	3.6985	3.1149	0.543	0.453	0.6764	2.3702	4.867	2017-10-08	5.477
GRF005	experimental animal	GR	80	2014-12-23	solitaire	2016-03-05	2012-03-03	102	2017-10-14	14.6	19.6	2017-10-14	1.61	993	2017-10-13	139	0	0	0	0	NA	NA	NA	NA	NA	NA	5.103	2017-10-11	4.955
GRF007	non-experimental animal	GR	106	2015-04-13	helper	NA	NA	NA	2017-11-29	NA	NA	2017-11-29	2.63	1148	2017-11-28	122	0	0	0	0	4.2535	3.5155	0.692	0.475	0.9016	3.055	NA	2017-11-22	5.4
HEF001	experimental animal	HE	35	2014-05-17	queen	2016-02-06	2012-02-04	119	2017-12-12	21	22.5	2017-12-12	3.58	707	2017-12-11	128	675	6	19	1	3.1241	1.9508	1.116	0.159	0.3959	1.5123	NA	2017-12-05	5.725
L2F020	experimental animal	L2	56	2014-09-04	queen	2016-02-08	2012-02-04	127	2017-12-02	17.4	22.1	2017-12-02	3.25	868	2017-12-01	138	663	4	10	0	4.5871	2.8411	1.676	0.311	0.8046	3.3778	5.153	2017-11-25	5.868
LAF007	experimental animal	LA	171	2016-01-11	queen	2017-10-31	2013-10-29	101	2018-10-11	21.9667	11.5	2018-10-11	2.75	1348	2018-10-10	140	345	0	0	0	3.47	3.0777	0.36	0.385	0.5535	2.1583	4.88	2018-10-04	5.669
LAF008	experimental animal	LA	171	2016-01-11	helper	2017-10-31	2013-10-29	117	2018-10-10	21.9667	11.4667	2018-10-10	2.75	1347	2018-10-10	147	0	0	0	0	3.1396	2.9422	0.174	0.501	0.4764	1.8019	5.375	2018-10-03	5.833
MAF003	experimental animal	MA	73	2014-10-29	solitaire	2016-02-20	2012-02-17	136	2017-12-05	15.9667	21.8	2017-12-05	3.1	911	2017-12-04	157	0	0	0	0	3.8132	3.0886	0.677	0.337	0.5528	2.8951	4.833	2017-11-28	5.382
MAF006	experimental animal	MA	73	2014-10-29	queen	2016-02-20	2012-02-17	111	2017-12-04	15.9667	21.7667	2017-12-04	3.1	914	2017-12-03	116	653	3	9	1	3.2597	1.7594	1.431	0.18	0.3439	1.5994	4.768	2017-11-27	5.426
MAF008	non-experimental animal	MA	115	2015-05-26	helper	NA	NA	NA	2017-12-03	NA	NA	2017-12-03	2.53	1179	2017-12-02	112	0	0	0	0	3.2079	2.4245	0.737	0.304	0.4398	1.8234	NA	NA	NA
NOF007	experimental animal	NO	79	2014-12-18	helper	2016-02-24	2012-02-22	112	2017-11-28	14.4333	21.4333	2017-11-28	2.95	987	2017-11-27	175	0	0	0	0	4.9179	4.0763	0.794	0.544	1.1849	4.1663	4.968	2017-11-21	5.868
NOF009	experimental animal	NO	79	2014-12-18	queen	2016-02-24	2012-02-22	119	2017-11-27	14.4333	21.4	2017-11-27	2.95	989	2017-11-26	133	642	5	6	1	4.4042	3.09	1.256	0.267	0.8596	3.207	4.901	2017-11-20	5.768
TIF003	experimental animal	TI	70	2014-10-31	queen	2016-07-25	2012-07-23	115	2017-10-17	21.1	14.9667	2017-10-17	2.96	918	2017-10-16	110	449	4	12	0	3.7545	2.2325	1.458	0.182	0.6081	2.0555	5.233	2017-10-10	5.976
TIF005	experimental animal	TI	70	2014-10-31	solitaire	2016-07-24	2012-07-18	93	2017-10-18	21.0667	15.0333	2017-10-18	2.97	920	2017-10-16	115	0	0	0	0	2.762	2.1632	0.558	0.234	0.3456	1.3133	4.475	NA	NA
TIF008	non-experimental animal	TI	137	2015-10-27	helper	NA	NA	NA	2017-11-20	NA	NA	2017-11-20	2.07	1253	2017-11-19	132	0	0	0	0	NA	NA	NA	NA	NA	NA	NA	2017-11-13	5.14
WAF011	experimental animal	WA	168	2016-01-07	helper	2017-10-31	2013-10-29	100	2018-10-09	22.1	11.4333	2018-10-09	2.76	1340	2018-10-09	120	0	0	0	0	3.8288	2.4689	1.3	0.274	0.7688	2.0987	5.3	2018-10-02	5.369
WAF014	experimental animal	WA	168	2016-01-07	queen	2017-10-31	2013-10-29	105	2018-10-08	22.1	11.4	2018-10-08	2.75	1343	2018-10-08	133	342	2	3	0	4.8267	2.9519	1.804	0.245	1.0219	3.4211	5.125	NA	NA
WEF001	experimental animal	WE	57	2014-09-18	solitaire	2016-01-30	2012-01-29	143	2017-12-08	16.6333	22.6	2017-12-08	3.22	872	2017-12-02	189	0	0	0	0	4.1429	3.5865	0.517	0.427	0.8231	3.0206	5.244	2017-12-02	5.7
WEF002	experimental animal	WE	57	2014-09-18	helper	2016-01-30	2012-01-29	160	2017-12-09	16.6333	22.6333	2017-12-09	3.23	873	2017-12-07	147	0	0	0	0	3.7151	2.4604	1.193	0.315	0.5902	2.1903	5.505	2017-12-01	5.712
1"Experimental" refers to animals that were randomly assigned to the breeder/non-breeder treatment
2Unique identifier used for each litter at the project facility
3Unique identifier used for each animal at the project facility
