# Supplementary material for: Morphological and genomic shifts in mole-rat ‘queens’ increase fecundity but reduce skeletal integrity
Source: eLife. 2021 Apr 12;10:e65760. doi: 10.7554/eLife.65760 (PMC8104968; doi:10.7554/eLife.65760)
Supplement: Supplementary file 2. — bone_0 refers to long bones; bone_1 refers to lumbar vertebrae. [file elife-65760-supp2.xlsx]

## Sheet: Table S2
Supplementary File 2. Results of mixed effects model of mole-rat gene expression data testing for effect of solitaire vs helper social status. bone_0 refers to long bones; bone_1 refers to lumbar vertebrae.
Gene	beta_.Intercept.	beta_bone1	beta_daysinculture	beta_queen_in_bone_0	beta_queen_in_bone_1	beta_solitaire_in_bone_0	beta_solitaire_in_bone_1	se_.Intercept.	se_bone1	se_daysinculture	se_queen_in_bone_0	se_queen_in_bone_1	se_solitaire_in_bone_0	se_solitaire_in_bone_1	p_val_.Intercept.	p_val_bone1	p_val_daysinculture	p_queen_in_bone_0	p_queen_in_bone_1	p_solitaire_in_bone_0	p_solitaire_in_bone_1	fdr_solitaire_in_bone_0	fdr_solitaire_in_bone_1
ENSFDAG00000000002	0.699997	0.267709	-0.0867003	-0.440128	-0.12234	0.399858	0.538062	0.678411	0.109938	0.00869703	0.161058	0.203425	0.230616	0.233105	0.3954	0.419436	0.352535	0.272773	0.7862	0.405044	0.26509	0.999752	0.418098
ENSFDAG00000000035	-0.865933	0.325713	0.0724435	0.512536	0.450405	-0.153554	-0.472955	0.324387	0.0864044	0.00379713	0.097094	0.12742	0.136522	0.141089	0.128415	0.267832	0.239741	0.0999992	0.207028	0.677714	0.20798	0.999752	0.388129
ENSFDAG00000000038	-0.144176	-0.0135648	0.0199439	0.0254951	-0.0682032	-0.0259979	-0.103073	0.0431288	0.0114879	0.000504846	0.0129091	0.0169411	0.0181513	0.0187584	0.487532	0.899289	0.374742	0.822452	0.600277	0.846984	0.451707	0.999752	0.495896
ENSFDAG00000000039	-0.0561398	0.0720647	0.00187262	0.026742	0.111156	0.0888778	0.0981502	0.0515515	0.00557164	0.000695203	0.0106646	0.0128969	0.0154666	0.0154231	0.804709	0.334318	0.94338	0.795671	0.327682	0.474823	0.429338	0.999752	0.485611
ENSFDAG00000000040	1.07224	-0.250715	-0.117302	2.13596	0.861053	0.859546	0.424225	4.14927	0.160148	0.0594871	0.709866	0.778014	1.05958	1.02696	0.59862	0.530989	0.630557	0.0112398	0.328968	0.403701	0.675495	0.999752	0.579046
ENSFDAG00000000042	1.20026	-0.1509	-0.129364	-0.0423122	0.0730075	-0.264209	-0.764389	0.553824	0.0984333	0.00699529	0.1365	0.17401	0.194919	0.197646	0.106781	0.630538	0.12193	0.908822	0.861066	0.549547	0.085546	0.999752	0.309712
ENSFDAG00000000044	-0.0154285	-0.128594	0.0199826	-0.0676975	-0.253412	-0.25295	0.00982982	0.0970905	0.0192792	0.00120268	0.0251101	0.0323438	0.0357405	0.0363842	0.960509	0.354375	0.564476	0.669221	0.158815	0.180898	0.9589	0.999752	0.665523
ENSFDAG00000000045	0.645345	-0.525733	-0.0395443	-0.0885457	-0.287202	-0.0177086	0.253579	0.0768247	0.0109814	0.00100286	0.0173982	0.0216877	0.0250076	0.0251709	0.0198954	5.2509e-07	0.211767	0.502031	0.051151	0.910838	0.109972	0.999752	0.324928
ENSFDAG00000000048	0.421961	-0.256311	-0.0543256	0.387099	0.0090093	0.0608304	-0.160099	0.52165	0.074132	0.00681487	0.11789	0.146864	0.169481	0.170555	0.559066	0.346512	0.510489	0.259566	0.981244	0.882531	0.698265	0.999752	0.587638
ENSFDAG00000000049	1.40883	-0.231784	-0.184201	0.850454	0.595563	-0.083563	-1.21491	1.33106	0.0929708	0.0185774	0.24786	0.286269	0.364444	0.358467	0.222038	0.447153	0.176551	0.0875929	0.265659	0.889908	0.0424396	0.999752	0.272404
ENSFDAG00000000051	-2.15725	-0.317682	0.270564	-0.312516	0.181274	-0.264088	-0.312519	0.342474	0.0672634	0.0042508	0.0881377	0.113418	0.125492	0.1277	0.000227566	0.22061	3.32665e-05	0.292493	0.590394	0.455976	0.381824	0.999752	0.467842
ENSFDAG00000000054	-0.151833	0.0596164	0.0118016	-0.0541626	0.423582	-0.380878	0.0105734	0.109747	0.0253816	0.00132033	0.0305093	0.0397732	0.0432087	0.0442675	0.646721	0.708254	0.745341	0.756495	0.0336751	0.0669046	0.95992	0.999752	0.665805
ENSFDAG00000000058	-2.51105	0.207458	0.316261	-0.570114	-0.892083	-0.0639548	0.256448	0.795462	0.0477044	0.011198	0.144089	0.16397	0.212791	0.208404	0.00487115	0.342192	0.00280213	0.133119	0.0275917	0.889733	0.574283	0.999752	0.541566
ENSFDAG00000000063	0.316072	-0.10957	-0.0314271	0.0102755	0.0767848	-0.195805	-0.396983	0.116929	0.016015	0.00153499	0.0260834	0.0323658	0.0375415	0.0377327	0.355316	0.38659	0.422471	0.94927	0.669519	0.312221	0.040985	0.999752	0.270694
ENSFDAG00000000064	-0.817296	0.538252	0.0406966	0.674203	0.0950718	-0.223866	-0.29458	0.592645	0.088262	0.0076926	0.136237	0.170568	0.195575	0.197124	0.288393	0.0700246	0.642645	0.0677607	0.817937	0.612708	0.507017	0.999752	0.514787
ENSFDAG00000000068	0.0709305	0.0533838	-0.0182076	0.170822	-0.0454121	0.263655	0.0349047	0.0985619	0.0164889	0.00125727	0.0236968	0.0300275	0.033899	0.0343018	0.821254	0.677606	0.607605	0.267136	0.79327	0.152144	0.850514	0.999752	0.636491
ENSFDAG00000000069	0.143999	-0.00757774	-0.0216701	0.0487038	0.225716	-0.0267655	-0.334034	0.24955	0.0502984	0.00308272	0.0649776	0.0838065	0.0924449	0.0941625	0.773149	0.973046	0.696318	0.848475	0.435571	0.929852	0.276348	0.999752	0.423051
ENSFDAG00000000079	0.0932622	-0.36104	-0.00305468	0.203336	-0.141978	0.0183596	-0.170511	0.430079	0.0740103	0.00546135	0.104593	0.132911	0.149498	0.151421	0.886914	0.18447	0.967029	0.529526	0.69695	0.962128	0.661251	0.999752	0.574207
ENSFDAG00000000091	-1.15189	0.365562	0.105342	-0.18454	0.214676	0.344281	0.483647	0.14235	0.0379166	0.00166628	0.0426075	0.0559156	0.0599097	0.0619136	0.00226538	0.0604693	0.00986194	0.371312	0.363955	0.159552	0.0519282	0.999752	0.280035
ENSFDAG00000000093	-0.361365	-0.109493	0.0471374	-0.22069	0.0783351	0.211467	0.171814	0.159148	0.0345	0.00193903	0.0428687	0.0556247	0.0608514	0.0621616	0.365028	0.555532	0.28441	0.286473	0.739783	0.391307	0.490746	0.999752	0.509031
ENSFDAG00000000094	-0.138131	-0.0276499	0.0241661	-0.193215	0.0859419	-0.14817	0.350244	0.171431	0.0169768	0.00233106	0.0346088	0.0414579	0.0503351	0.0500496	0.73867	0.831943	0.616702	0.298991	0.672962	0.508979	0.117451	0.999752	0.33284
ENSFDAG00000000095	-0.00063	-0.169612	0.0167385	-0.0801334	-0.0891949	-0.254223	-0.183549	0.0979763	0.0260971	0.00114687	0.0293258	0.0384854	0.0412345	0.0426137	0.998394	0.293752	0.621118	0.639828	0.64935	0.210591	0.373919	0.999752	0.464307
ENSFDAG00000000101	-1.96223	0.781962	0.159204	0.707855	-0.184772	0.569617	-0.0067787	0.741656	0.1404	0.00926649	0.18779	0.240841	0.267669	0.272015	0.0226966	0.0368974	0.0981571	0.102373	0.706542	0.2709	0.98963	0.999752	0.673649
ENSFDAG00000000103	0.0337798	0.174744	-0.0190558	0.241434	0.119812	0.019306	-0.217656	0.0521373	0.00495192	0.00071156	0.01041	0.0124141	0.0151607	0.0150543	0.882391	0.01302	0.475001	0.0179658	0.282224	0.875406	0.0760728	0.999752	0.300477
ENSFDAG00000000106	-0.143906	0.0725395	0.0185929	-0.250634	-0.0538175	0.075757	-0.00345081	0.0675095	0.0179819	0.000790235	0.0202066	0.0265179	0.0284122	0.0293625	0.579677	0.588543	0.508351	0.0778729	0.741033	0.653115	0.983933	0.999752	0.672014
ENSFDAG00000000107	-0.52483	-0.0294312	0.051367	0.0132764	0.102426	0.196377	0.362609	0.14397	0.0335129	0.00172984	0.0401527	0.052367	0.056852	0.0582636	0.166606	0.872276	0.216815	0.947174	0.654447	0.410165	0.133034	0.999752	0.344256
ENSFDAG00000000110	0.698729	-0.0890813	-0.056136	-0.330458	-0.00286364	-0.10025	-0.232926	0.203198	0.0144255	0.00283316	0.0379596	0.0439134	0.0557873	0.0548986	0.121126	0.458277	0.291589	0.0898642	0.989097	0.671246	0.320167	0.999752	0.441971
ENSFDAG00000000114	2.96215	-0.719085	-0.242746	-0.00499525	-1.09944	0.0209192	-0.00995978	3.08885	0.302155	0.0420475	0.621537	0.743551	0.904323	0.898835	0.0919068	0.190814	0.236488	0.994945	0.202304	0.98245	0.991618	0.999752	0.674344
ENSFDAG00000000116	-0.163926	0.0322535	-0.0050562	0.557743	-0.00986882	0.621116	0.167522	0.462301	0.0956613	0.00568286	0.121834	0.157492	0.173197	0.176593	0.809483	0.916946	0.946525	0.110065	0.980161	0.135579	0.690156	0.999752	0.584118
ENSFDAG00000000117	4.81545	-1.24494	-0.464203	-1.06546	-1.49139	-1.06817	-1.6411	2.73185	0.118538	0.0390071	0.473061	0.52325	0.704329	0.684334	0.00357455	0.000299271	0.0187547	0.121357	0.0392312	0.203095	0.0472768	0.999752	0.277021
ENSFDAG00000000123	-1.18389	-0.105249	0.176725	-1.11475	-0.492888	-0.11693	0.0472657	0.501745	0.116487	0.00603172	0.139751	0.182231	0.197892	0.20278	0.0946511	0.757798	0.0228755	0.00286425	0.248248	0.792665	0.916406	0.999752	0.655013
ENSFDAG00000000126	-1.76006	0.0138696	0.213337	-0.367205	-0.0430488	0.268492	0.407688	0.519822	0.0871794	0.00662835	0.125103	0.158565	0.178951	0.181093	0.0146392	0.962534	0.00878346	0.299185	0.91391	0.525628	0.33805	0.999752	0.44938
ENSFDAG00000000132	-0.24407	0.146559	0.017488	0.0285663	0.200744	0.0246573	0.0776892	0.167896	0.019575	0.00224646	0.0355279	0.0433211	0.0513988	0.0513832	0.551407	0.29486	0.71215	0.879538	0.334806	0.913393	0.731803	0.999752	0.597826
ENSFDAG00000000141	-0.214462	0.104305	0.00730356	0.449357	0.137329	0.222692	-0.199691	0.418021	0.0918303	0.00507998	0.113319	0.147188	0.160783	0.164337	0.740112	0.730695	0.918382	0.181918	0.720379	0.57864	0.622299	0.999752	0.55892
ENSFDAG00000000144	0.552751	-0.0299729	-0.0560461	-0.047959	0.0752906	0.0395378	-0.38309	0.219655	0.0457475	0.00269682	0.0580619	0.075096	0.0825231	0.0841628	0.238242	0.888554	0.28048	0.842237	0.783511	0.89053	0.186665	0.999752	0.37727
ENSFDAG00000000146	-0.33437	0.0522142	0.0396702	-0.0977743	0.0399304	-0.0875854	-0.0371054	0.115214	0.0306885	0.00134864	0.0344852	0.0452563	0.0484891	0.0501109	0.324581	0.765659	0.28004	0.598533	0.851112	0.690815	0.868349	0.999752	0.642464
ENSFDAG00000000148	-0.186711	-0.0565533	0.0366337	-0.34601	-0.209321	0.0452158	0.0292695	0.13526	0.0359424	0.00158399	0.0404324	0.0530582	0.0568608	0.0587515	0.611681	0.765474	0.357333	0.0852919	0.363491	0.849607	0.903885	0.999752	0.651118
ENSFDAG00000000153	-0.254535	0.0699108	0.0257284	0.390139	-0.03124	-0.0594969	-0.283885	0.108634	0.0237503	0.00132141	0.0293812	0.0381487	0.0416943	0.0426073	0.43996	0.650089	0.479086	0.0228421	0.872924	0.770763	0.169035	0.999752	0.366077
ENSFDAG00000000157	0.568682	0.109873	-0.0675636	0.00478671	0.143188	-0.162206	0.166558	0.217269	0.0136201	0.00305138	0.0396554	0.0453178	0.0584906	0.0573545	0.222453	0.346471	0.221289	0.980823	0.501185	0.502416	0.486756	0.999752	0.507454
ENSFDAG00000000159	-1.738	0.574388	0.14273	0.265526	0.608324	0.0494778	-1.14969	0.844597	0.145377	0.0107247	0.205421	0.261045	0.293614	0.297393	0.0586049	0.13195	0.168131	0.557978	0.233798	0.927246	0.0350114	0.999752	0.265136
ENSFDAG00000000161	0.542216	0.0367978	-0.0552803	-0.0643649	0.0384852	-0.112775	0.149768	0.128293	0.0155511	0.00170921	0.0274795	0.0336497	0.0397052	0.0397446	0.130075	0.767932	0.181181	0.697809	0.833825	0.571416	0.452508	0.999752	0.496
ENSFDAG00000000162	0.0557412	-0.0178053	-0.00574522	-0.0486804	-0.0658602	0.0384973	0.198082	0.0133762	0.00204122	0.000173022	0.00310301	0.0038949	0.00445119	0.00449012	0.629835	0.693509	0.662276	0.382172	0.291289	0.563925	0.00311584	0.999752	0.204207
ENSFDAG00000000163	0.387539	0.103212	-0.0384274	-0.417067	-0.242983	-0.0621378	0.280819	0.256434	0.0253568	0.00348738	0.0517486	0.0619797	0.0752669	0.0748364	0.444097	0.51688	0.51523	0.0667439	0.329063	0.820819	0.304644	0.999752	0.435899
ENSFDAG00000000168	0.570215	-0.0660626	-0.0597125	0.0683197	-0.17333	0.183992	0.175754	0.0600818	0.00970997	0.000770553	0.0142485	0.0179916	0.0204038	0.0206221	0.0200021	0.502591	0.031467	0.567085	0.196277	0.197718	0.220998	0.999752	0.394401
ENSFDAG00000000173	-0.0900001	-0.015382	0.00876573	-0.0252018	0.162332	-0.0439696	0.131038	0.0759372	0.013824	0.000955268	0.0189063	0.0241578	0.026979	0.0273792	0.743971	0.895912	0.776707	0.854574	0.296292	0.788934	0.428403	0.999752	0.485611
ENSFDAG00000000174	0.324713	-0.380697	0.0183267	1.38089	0.673278	0.630145	0.750785	5.44313	0.22758	0.0778246	0.938735	1.03525	1.39882	1.35801	0.889308	0.42486	0.947622	0.154087	0.508153	0.594175	0.519404	0.999752	0.519781
ENSFDAG00000000183	1.48421	-0.00126335	-0.162663	0.0673368	-0.212005	-0.0712584	-0.513239	0.306751	0.0817066	0.00359068	0.091815	0.120493	0.1291	0.133418	0.00736665	0.996474	0.00663626	0.824138	0.541362	0.842792	0.159986	0.999752	0.360306
ENSFDAG00000000184	-0.104053	-0.135015	0.0245548	-0.173772	0.0824739	-0.12785	-0.0611424	0.046577	0.00807955	0.000590686	0.0113645	0.0144529	0.0162399	0.0164532	0.62971	0.133079	0.312343	0.103088	0.492698	0.315741	0.633598	0.999752	0.562973
ENSFDAG00000000188	-0.097926	0.00495456	0.00585775	0.155586	0.0981123	0.142091	-0.0878919	0.0604169	0.00817666	0.000794344	0.0134216	0.0166329	0.0193248	0.0194154	0.690336	0.956304	0.835355	0.179279	0.446808	0.306717	0.528186	0.999752	0.524246
ENSFDAG00000000193	-0.559535	-0.0864264	0.0717527	-0.205766	0.0795974	-0.301918	-0.067096	0.164757	0.0157622	0.00224716	0.0329583	0.039334	0.0479881	0.0476625	0.16805	0.491204	0.130118	0.257036	0.688168	0.168132	0.75859	0.999752	0.606756
ENSFDAG00000000197	1.06211	-0.336907	-0.090128	-0.217002	-0.030924	-0.21948	-0.478911	0.200673	0.0482302	0.00239596	0.0568791	0.0743268	0.0804289	0.0825619	0.0177413	0.125008	0.0655808	0.362883	0.909691	0.438986	0.0955687	0.999752	0.316789
ENSFDAG00000000198	-0.365098	0.295639	0.0263198	-0.06619	0.0317442	0.0249174	-0.262624	0.258671	0.0423277	0.00331112	0.0616454	0.0779388	0.0882433	0.089225	0.472848	0.150725	0.647384	0.789786	0.90947	0.933151	0.379289	0.999752	0.46694
ENSFDAG00000000204	-0.842865	-0.725305	0.115748	-0.00871549	0.721365	-0.364766	0.959868	0.303967	0.0747776	0.00361265	0.0871966	0.114088	0.123169	0.1266	0.126319	0.00799276	0.0541355	0.976454	0.0327062	0.298639	0.00698199	0.999752	0.228594
ENSFDAG00000000218	-0.0693017	-0.152319	0.0422574	-0.59826	-0.121172	-0.300113	-0.138925	0.182148	0.0242837	0.00239939	0.0402561	0.0498069	0.0579894	0.058232	0.871007	0.328343	0.38831	0.00286586	0.587166	0.212667	0.564814	0.999752	0.538003
ENSFDAG00000000229	-0.578983	0.107786	0.0562095	0.179239	0.433442	0.315818	-0.538019	0.847799	0.161083	0.0105858	0.21501	0.275845	0.306434	0.311451	0.529473	0.78827	0.584845	0.699091	0.409215	0.568327	0.335017	0.999752	0.448287
ENSFDAG00000000230	-0.618277	-0.181294	0.0787508	-0.227801	-0.265866	0.355655	0.674204	0.239045	0.0636725	0.00279815	0.0715498	0.0938978	0.100605	0.10397	0.206026	0.472469	0.136556	0.394419	0.385597	0.262163	0.0365353	0.999752	0.267604
ENSFDAG00000000234	0.539331	0.032846	-0.062146	0.0943818	-0.0486039	0.050392	-0.176974	0.0831232	0.0128087	0.00107369	0.019354	0.0243179	0.0277546	0.0280065	0.0613928	0.771647	0.0578813	0.497501	0.755284	0.762287	0.290284	0.999752	0.429496
ENSFDAG00000000235	-0.785719	0.13661	0.0755375	0.226373	-0.213371	0.351847	0.0309528	0.13959	0.0310669	0.00169207	0.0380795	0.0495088	0.0540053	0.0552306	0.0354655	0.438307	0.0663071	0.246026	0.337587	0.130018	0.895216	0.999752	0.648935
ENSFDAG00000000236	0.344203	-0.2249	-0.0281657	0.0823372	-0.101064	0.0633448	0.167473	0.0580913	0.00798914	0.000762196	0.0129771	0.0161098	0.0186753	0.018773	0.153263	0.011864	0.307632	0.469814	0.425883	0.642985	0.221593	0.999752	0.394699
ENSFDAG00000000237	0.0814092	-0.132184	-0.0137672	0.312233	0.0994318	-0.027289	0.112451	0.092702	0.0173376	0.00116072	0.0233491	0.0299113	0.0332927	0.0338187	0.789177	0.315432	0.686144	0.0410175	0.565345	0.881112	0.54088	0.999752	0.529698
ENSFDAG00000000239	0.675766	-0.311675	-0.0612963	-0.0269143	0.060221	-0.23488	0.21799	0.144569	0.0385078	0.00169226	0.0432718	0.0567874	0.0608438	0.0628789	0.0755207	0.112222	0.136212	0.897054	0.800493	0.340986	0.384666	0.999752	0.468895
ENSFDAG00000000247	-0.257268	0.00465612	0.0290241	-0.103129	0.14919	-0.124424	0.0398992	0.0647373	0.015011	0.00077843	0.01802	0.0234956	0.0255182	0.0261469	0.311953	0.969685	0.298211	0.442338	0.330406	0.436043	0.805103	0.999752	0.623245
ENSFDAG00000000250	0.039895	0.0537058	-0.00832349	0.140552	0.017023	-0.137863	0.173537	0.0644427	0.0119784	0.000807759	0.0161882	0.0207258	0.0230863	0.0234459	0.875122	0.623634	0.769627	0.269297	0.905874	0.364228	0.257074	0.999752	0.413454
ENSFDAG00000000252	-0.0492685	0.0889455	0.0014531	0.0274976	0.133371	-0.131357	-0.131157	0.0497446	0.0132501	0.000582288	0.0148893	0.0195399	0.0209356	0.0216359	0.82517	0.439696	0.951982	0.821707	0.340026	0.363963	0.37257	0.999752	0.463783
ENSFDAG00000000255	-0.456104	-0.0877525	0.0568639	-0.157336	0.240255	-0.0555045	-0.00751849	0.0990692	0.0190234	0.00123467	0.0252419	0.0324154	0.0359637	0.0365664	0.147313	0.524625	0.105596	0.322028	0.182061	0.769765	0.968637	0.999752	0.668777
ENSFDAG00000000260	-0.0360478	0.196993	0.000908557	0.411592	-0.0673315	0.0829079	-0.715196	0.348226	0.0670078	0.00433821	0.0888071	0.114067	0.126521	0.128651	0.95129	0.446653	0.988994	0.167231	0.841981	0.815696	0.0461557	0.999752	0.276006
ENSFDAG00000000266	1.19955	0.158559	-0.151138	0.196239	-1.20378	1.03081	0.514273	0.882976	0.235191	0.0103357	0.264288	0.346836	0.371611	0.384041	0.201756	0.743706	0.137112	0.702667	0.0409508	0.0908426	0.406617	0.999752	0.478644
ENSFDAG00000000269	0.307495	0.134081	-0.0719085	-0.120902	-0.169963	-0.353719	-1.07585	2.03532	0.237191	0.0272341	0.430626	0.52506	0.623004	0.622805	0.829349	0.783079	0.663028	0.853826	0.814551	0.654053	0.172802	0.999752	0.367418
ENSFDAG00000000272	0.989596	0.116697	-0.0988012	-0.0735702	-0.0745989	-0.328688	-0.102248	0.703561	0.0938277	0.00926742	0.155509	0.192411	0.22401	0.22495	0.238081	0.703224	0.304741	0.852004	0.864958	0.487391	0.829313	0.999752	0.631345
ENSFDAG00000000273	-0.0763127	0.0925165	2.86914e-05	-0.0207186	0.233272	-0.217007	0.0719753	0.132832	0.0139879	0.00179589	0.0272754	0.0328915	0.0395904	0.0394452	0.834148	0.43407	0.99946	0.900166	0.198361	0.275434	0.717054	0.999752	0.593671
ENSFDAG00000000280	-0.191349	0.0246779	0.0228957	-0.259101	0.209094	-0.0963161	0.204693	0.0752939	0.00971606	0.000995811	0.0164587	0.0202918	0.0237335	0.0238068	0.485589	0.80231	0.468117	0.0434218	0.142145	0.531841	0.184628	0.999752	0.376154
ENSFDAG00000000281	-1.80079	0.215402	0.181821	-0.0770686	-0.155366	0.540155	0.544206	0.206849	0.0300855	0.00269379	0.0471395	0.0588705	0.0677202	0.0682023	7.51171e-05	0.21429	0.000459726	0.722616	0.521955	0.037924	0.0371751	0.999752	0.267989
ENSFDAG00000000282	0.133701	-0.0128179	-0.0118889	-0.0716221	0.0396158	-0.0156437	-0.0418753	0.0284792	0.00358499	0.000377771	0.00617465	0.00759222	0.00891093	0.00893104	0.428207	0.830486	0.540748	0.362049	0.649356	0.868377	0.657689	0.999752	0.573158
ENSFDAG00000000290	-2.0407	0.189259	0.207442	0.152384	0.435142	0.321494	0.193144	0.287431	0.0276795	0.00391811	0.0575973	0.0687879	0.0838453	0.0832941	0.000141019	0.2553	0.000919549	0.525461	0.097094	0.266877	0.503349	0.999752	0.513696
ENSFDAG00000000291	-0.95218	-0.115992	0.110864	0.256725	0.326657	-0.357145	0.0460983	0.679594	0.179066	0.00797101	0.202207	0.265294	0.284531	0.293798	0.248077	0.784003	0.21433	0.568059	0.525949	0.503148	0.932224	0.999752	0.658598
ENSFDAG00000000294	0.136062	-0.00118989	-0.00994488	-0.188848	0.0298242	-0.0462009	0.075055	0.0574937	0.00631086	0.000774135	0.0119476	0.0144729	0.0173187	0.0172788	0.57041	0.988049	0.72077	0.08404	0.804206	0.725536	0.568012	0.999752	0.539402
ENSFDAG00000000295	0.732548	0.0550083	-0.114841	0.549977	0.247272	-0.060762	-0.205735	0.700491	0.103926	0.00909735	0.160802	0.201242	0.230866	0.232665	0.381435	0.864512	0.228575	0.170217	0.58149	0.899368	0.669727	0.999752	0.576498
ENSFDAG00000000296	0.233752	-0.150909	-0.0191356	0.206979	0.0670115	0.00754199	0.0129585	0.073862	0.00609659	0.00101938	0.0142503	0.0167423	0.0208465	0.0206082	0.389739	0.0532687	0.548946	0.0829427	0.604532	0.958341	0.928074	0.999752	0.657476
ENSFDAG00000000298	-0.17288	-0.216545	0.0248106	-0.134024	0.122676	-0.248658	-0.290244	0.308959	0.0334384	0.00416593	0.0639407	0.0773365	0.0927278	0.0924711	0.755783	0.236333	0.700683	0.596097	0.659118	0.414169	0.339849	0.999752	0.449995
ENSFDAG00000000301	0.508145	0.434238	-0.0764155	-0.301322	-0.571089	-0.131909	0.264624	0.928795	0.207562	0.0112495	0.253877	0.330176	0.360003	0.368239	0.59801	0.340522	0.471237	0.549824	0.320285	0.82599	0.66278	0.999752	0.574585
ENSFDAG00000000307	-0.0457786	-0.0263489	0.0084606	0.00178698	-0.0141839	0.148697	0.390001	0.122957	0.013879	0.00165084	0.025764	0.0313048	0.0373124	0.0372609	0.896129	0.823024	0.835047	0.991117	0.936105	0.441422	0.0433409	0.999752	0.273156
ENSFDAG00000000309	0.0128963	-0.0400032	0.00875854	-0.276829	-0.111984	-0.044165	0.355229	0.13434	0.022284	0.00171598	0.0321891	0.0407533	0.0460589	0.0465928	0.971932	0.788717	0.832548	0.122838	0.579085	0.836956	0.0998268	0.999752	0.320377
ENSFDAG00000000316	0.034151	-0.000907188	-0.00145769	0.0277802	0.0392925	-0.115	-0.154625	0.0179084	0.00337129	0.000223974	0.00452345	0.00579831	0.0064486	0.00655201	0.798571	0.987534	0.922408	0.679572	0.605847	0.152124	0.0560992	0.999752	0.284807
ENSFDAG00000000325	0.162946	0.161462	-0.0370314	0.215562	0.0781656	0.38904	0.241067	0.0511651	0.00849137	0.000653498	0.012262	0.0155253	0.0175453	0.017749	0.471297	0.0797416	0.14745	0.051575	0.530443	0.00331329	0.0703782	0.999752	0.296684
ENSFDAG00000000334	0.115454	-0.185881	-0.00175457	-0.033162	0.114162	-0.153206	-0.150798	0.0676143	0.0180099	0.000791462	0.020238	0.0265591	0.0284563	0.0294081	0.657039	0.166024	0.950271	0.815677	0.483608	0.363767	0.379212	0.999752	0.46694
ENSFDAG00000000337	-0.291148	0.242191	0.0283659	0.304964	-0.421407	-0.101029	-0.803516	0.575069	0.102205	0.00726368	0.141733	0.180681	0.202393	0.205224	0.70103	0.448709	0.739265	0.417911	0.321495	0.822316	0.0761127	0.999752	0.300477
ENSFDAG00000000338	0.327294	-0.0457933	-0.0260134	-0.114551	-0.0718421	-0.0990432	-0.356401	0.0876525	0.0233473	0.00102602	0.0262357	0.0344302	0.0368896	0.0381235	0.268945	0.764408	0.416724	0.479433	0.698625	0.606084	0.0679506	0.999752	0.294908
ENSFDAG00000000342	1.26618	-0.704846	-0.131616	0.436214	0.0902792	-0.268356	-0.20669	0.484629	0.0797686	0.00619784	0.115763	0.146448	0.165682	0.167559	0.0689392	0.0125737	0.0945606	0.199816	0.813503	0.509713	0.613605	0.999752	0.55581
ENSFDAG00000000348	0.053518	0.314502	-0.022206	-0.0148925	0.0928188	0.083156	0.00286513	0.120413	0.0203479	0.00153355	0.0290678	0.0368707	0.0415699	0.0420784	0.87743	0.02747	0.570681	0.930394	0.628821	0.683381	0.988856	0.999752	0.673385
ENSFDAG00000000349	-0.794544	0.613305	0.0409358	0.713928	-0.205324	0.770959	-0.3984	0.63856	0.0800981	0.00847391	0.138288	0.16997	0.199593	0.200019	0.320077	0.0302322	0.656541	0.0548798	0.618465	0.0844058	0.373033	0.999752	0.463817
ENSFDAG00000000351	0.306375	-0.07243	-0.0276119	-0.0149358	-0.0865078	0.0798254	-0.103085	0.132945	0.0205105	0.00171692	0.0309682	0.0389159	0.0444084	0.0448133	0.400759	0.613036	0.50517	0.932362	0.661008	0.704837	0.626286	0.999752	0.560106
ENSFDAG00000000352	0.120508	-0.114479	0.00123318	-0.456585	-0.18906	0.415819	0.746029	0.181384	0.0344254	0.00226524	0.0459786	0.0589817	0.0655312	0.0666014	0.777212	0.537232	0.979329	0.0332267	0.436292	0.104301	0.00384294	0.999752	0.204207
ENSFDAG00000000355	-0.419426	0.128937	0.0382023	-0.0947443	0.0300783	0.0836329	0.326825	0.0842786	0.0137463	0.00107935	0.0200592	0.0253526	0.0287168	0.0290331	0.148525	0.271451	0.244907	0.503525	0.850168	0.621642	0.0550998	0.999752	0.284153
ENSFDAG00000000362	-0.290827	0.603963	-0.0189307	0.75271	0.513375	0.391087	-0.351533	0.894043	0.0648225	0.012449	0.167726	0.194445	0.246343	0.242569	0.758404	0.0176836	0.865271	0.0660734	0.244334	0.430721	0.47538	0.999752	0.504032
ENSFDAG00000000374	1.3781	-0.309435	-0.144852	0.064964	-0.295082	-0.166688	-0.833634	0.427958	0.0524159	0.00569485	0.0919691	0.112747	0.132842	0.13302	0.0351534	0.176513	0.0549245	0.830379	0.379509	0.647429	0.0222724	0.999752	0.253593
ENSFDAG00000000376	-0.021801	0.0297582	0.00453755	0.0697199	-0.000131576	-0.0914962	-0.0910006	0.16173	0.0314311	0.00201124	0.0414268	0.0532583	0.0590026	0.0600177	0.956768	0.8667	0.919408	0.731942	0.999545	0.706415	0.7103	0.999752	0.591444
ENSFDAG00000000381	-1.2359	-0.189441	0.133669	0.190859	0.757928	-0.0235607	-0.211772	0.262768	0.0228471	0.00361225	0.0513194	0.060625	0.0749512	0.0742154	0.0159085	0.210094	0.0261455	0.399506	0.00208229	0.931419	0.436947	0.999752	0.490031
ENSFDAG00000000383	-2.21531	0.563432	0.2577	-0.862062	-0.100151	-0.442694	-1.12125	0.715864	0.103508	0.00933021	0.162792	0.203176	0.233908	0.235527	0.00883679	0.079898	0.00763287	0.0326309	0.824168	0.360014	0.0208674	0.999752	0.253078
ENSFDAG00000000390	0.463883	-0.119624	-0.0448995	-0.0875264	0.108819	-0.0811738	-0.0865621	0.153462	0.0408763	0.00179635	0.0459334	0.0602803	0.0645862	0.0667465	0.236352	0.554068	0.289434	0.682988	0.657609	0.749417	0.737585	0.999752	0.600802
ENSFDAG00000000392	-0.0759169	-0.0568251	0.0139336	-0.247538	0.0702802	0.0914886	0.249014	0.109746	0.0183794	0.0013997	0.026397	0.0334526	0.0377604	0.0382105	0.818742	0.675102	0.709572	0.127614	0.70079	0.637774	0.202702	0.999752	0.385982
ENSFDAG00000000405	-2.17767	-0.902611	0.329964	-0.310172	-0.711461	-0.252058	0.00247269	1.56095	0.0585053	0.0224001	0.26633	0.291255	0.397776	0.385304	0.081333	0.000190216	0.027478	0.547823	0.187403	0.689413	0.996822	0.999752	0.675072
ENSFDAG00000000408	0.361495	-1.96494	0.106766	-0.719789	-0.465981	0.206308	1.21754	1.0388	0.111963	0.0140126	0.214727	0.259596	0.311442	0.310538	0.722829	4.29701e-09	0.367095	0.120346	0.360415	0.71162	0.028898	0.999752	0.258604
ENSFDAG00000000414	-0.816396	0.114828	0.113277	-0.809152	0.189564	-0.325411	-0.42492	0.251319	0.0669418	0.00294183	0.0752236	0.0987189	0.105771	0.109308	0.103419	0.657178	0.0367525	0.00317556	0.546289	0.317032	0.198713	0.999752	0.38486
ENSFDAG00000000418	0.305347	-0.0783147	-0.0190731	-0.105767	-0.284641	-0.0614272	-0.355754	0.0313605	0.00581658	0.000393237	0.00787051	0.0100746	0.011225	0.011399	0.0846614	0.304488	0.336139	0.233183	0.0045703	0.562059	0.00086196	0.999752	0.199774
ENSFDAG00000000426	-0.232616	-0.0446399	0.0222713	-0.0369788	0.0640785	0.184609	0.249816	0.139187	0.00984368	0.00194113	0.0259821	0.0300458	0.0381889	0.0375763	0.532954	0.652761	0.61321	0.818549	0.711624	0.344823	0.19749	0.999752	0.384377
ENSFDAG00000000432	-0.0896699	0.018097	0.00269143	0.109386	0.0938167	0.06998	0.129103	0.0694972	0.0179092	0.000818569	0.0204308	0.0267862	0.0287887	0.0296782	0.733748	0.892431	0.925053	0.444106	0.566493	0.680015	0.453614	0.999752	0.496394
ENSFDAG00000000442	0.182916	-0.054976	-0.0187999	0.0606067	0.285939	0.160419	-0.0239398	0.165538	0.023874	0.0021583	0.0376094	0.0469265	0.0540435	0.0544128	0.653017	0.721988	0.685721	0.754648	0.186845	0.490158	0.918257	0.999752	0.655091
ENSFDAG00000000444	0.0484313	-0.239333	0.0153953	-0.162389	-0.0445817	-0.0198681	-0.424818	0.0541616	0.0100907	0.000678616	0.0136191	0.0174404	0.0194212	0.0197254	0.835148	0.0171928	0.554532	0.164075	0.735679	0.886633	0.00248835	0.999752	0.204207
ENSFDAG00000000451	-1.4814	-0.517818	0.186966	-0.251962	0.387702	0.239642	0.544512	0.227458	0.0556262	0.00270649	0.0650496	0.0850851	0.0919107	0.0944393	0.0018955	0.0281264	0.000325838	0.323203	0.183801	0.429259	0.0764166	0.999752	0.300835
ENSFDAG00000000454	0.145141	-0.0556006	-0.00802272	-0.0992077	-0.230165	-0.0927128	-0.0686628	0.0696077	0.00446076	0.000976403	0.0127543	0.0146065	0.0188005	0.0184467	0.582235	0.405136	0.797373	0.3797	0.0568541	0.498934	0.613174	0.999752	0.555653
ENSFDAG00000000456	-0.0534708	-0.0515907	0.0125624	-0.228472	-0.0409014	-0.0881743	-0.23667	0.16127	0.0166542	0.00218444	0.0329336	0.0396307	0.0478337	0.0476276	0.894075	0.689327	0.788096	0.208043	0.837214	0.686832	0.27816	0.999752	0.42418
ENSFDAG00000000457	-0.0714918	0.137065	-0.00395551	0.126258	0.257679	-0.142019	-0.108131	0.122078	0.0325168	0.00142899	0.0365397	0.0479525	0.0513779	0.0530964	0.837873	0.447192	0.916663	0.508928	0.239307	0.530953	0.63888	0.999752	0.565627
ENSFDAG00000000459	0.0585689	-0.0802289	-0.0219995	0.660657	0.268752	0.151567	0.658621	0.887142	0.162421	0.0111491	0.22141	0.283064	0.315896	0.320646	0.950417	0.842206	0.834956	0.160308	0.613463	0.787414	0.244783	0.999752	0.405669
ENSFDAG00000000462	-1.7491	-0.0916652	0.191111	-0.285972	0.434658	0.508162	0.927557	0.548519	0.081131	0.00712672	0.125774	0.157354	0.180593	0.181981	0.0181929	0.74759	0.0235852	0.420036	0.273191	0.231781	0.0296796	0.999752	0.258604
ENSFDAG00000000468	0.838083	0.0153477	-0.106554	-0.11191	0.0792265	-0.187294	-0.13071	0.196249	0.0196941	0.00266532	0.0397617	0.0476989	0.0578046	0.0575016	0.0585129	0.912914	0.0390247	0.574644	0.716786	0.435974	0.585692	0.999752	0.546714
ENSFDAG00000000469	-1.25169	0.909556	0.0940677	0.093097	0.163424	0.159809	-0.303685	0.985972	0.221029	0.0119347	0.269917	0.351116	0.382706	0.391516	0.207465	0.053032	0.389204	0.857786	0.782703	0.796155	0.627433	0.999752	0.560693
ENSFDAG00000000480	0.744044	0.00749233	-0.107173	0.526547	-0.171375	0.104691	-0.336701	0.848316	0.104941	0.0112757	0.182888	0.22445	0.264083	0.264524	0.419188	0.981548	0.312836	0.218231	0.717552	0.838571	0.51269	0.999752	0.516415
ENSFDAG00000000483	-1.08057	0.828995	0.0716737	0.236742	0.000623562	0.404248	-0.0953618	0.308065	0.0664119	0.00375743	0.0827621	0.107342	0.117501	0.120003	0.0515525	0.00129613	0.242295	0.410552	0.998481	0.238276	0.783099	0.999752	0.616241
ENSFDAG00000000485	0.178886	0.0840798	-0.0168187	-0.155136	-0.0283045	-0.00572981	-0.172667	0.316298	0.0468888	0.00410826	0.0725868	0.0908335	0.104216	0.105025	0.750428	0.697801	0.793013	0.564739	0.925177	0.985839	0.594173	0.999752	0.549725
ENSFDAG00000000486	-0.55847	0.0138565	0.0750526	-0.434901	-0.0882804	0.0847146	0.090764	0.175124	0.0466462	0.00204992	0.0524171	0.0687891	0.0737029	0.0761681	0.182031	0.948845	0.0973843	0.0574902	0.736424	0.755007	0.742252	0.999752	0.60207
ENSFDAG00000000492	0.154154	-0.00412726	-0.0188369	0.166547	0.164918	-0.297247	0.00524228	0.146813	0.0105769	0.0020451	0.027507	0.0318685	0.040408	0.0397815	0.687448	0.967989	0.677018	0.315289	0.355579	0.139217	0.979031	0.999752	0.670815
ENSFDAG00000000494	-1.37544	-0.166111	0.159997	-0.182587	-0.211977	0.423284	0.574431	0.626679	0.136603	0.00762719	0.16925	0.219706	0.240204	0.245433	0.0823035	0.653117	0.0669486	0.657173	0.651097	0.387776	0.246252	0.999752	0.407078
ENSFDAG00000000498	0.0648787	0.0664146	-0.000652151	-0.407033	0.0848493	-0.110014	0.241624	0.234661	0.048883	0.00288094	0.0620345	0.0802355	0.0881687	0.0899213	0.893457	0.76388	0.990306	0.102211	0.764523	0.711008	0.420377	0.999752	0.483749
ENSFDAG00000000499	1.11853	-0.115317	-0.150001	0.721133	-0.105892	0.459642	0.34285	0.523676	0.081833	0.0067503	0.122582	0.154247	0.175715	0.177393	0.122184	0.686865	0.0678926	0.0394282	0.787451	0.272852	0.415633	0.999752	0.481908
ENSFDAG00000000501	0.402937	0.322599	-0.0856789	0.80838	-0.575013	0.730853	-0.578914	1.65541	0.258276	0.0213436	0.387264	0.487221	0.555148	0.560421	0.754149	0.525574	0.557565	0.193941	0.410061	0.326641	0.439336	0.999752	0.491152
ENSFDAG00000000503	0.457178	0.387315	-0.0954823	0.741838	0.171816	-0.0260431	-0.484662	0.731342	0.125315	0.0092934	0.177547	0.225521	0.253807	0.257033	0.59293	0.273906	0.321951	0.078312	0.7175	0.958772	0.339087	0.999752	0.449794
ENSFDAG00000000504	0.011661	-0.18397	0.00197701	-0.315243	0.335723	-0.164976	0.0557618	0.214422	0.0338134	0.00276021	0.0503678	0.0634387	0.0721797	0.0728915	0.979909	0.317084	0.969982	0.160125	0.182558	0.539173	0.836371	0.999752	0.632453
ENSFDAG00000000506	0.484746	-0.0517689	-0.0437547	0.0433245	-0.0213151	-0.0363331	-0.0398491	0.0980227	0.00776842	0.00135679	0.0187393	0.0219234	0.0274482	0.0271004	0.121554	0.556964	0.234885	0.751633	0.885534	0.826414	0.80873	0.999752	0.623963
ENSFDAG00000000509	0.0132631	0.0313642	-0.020936	0.752863	-0.285441	1.04677	-0.523195	1.00358	0.258693	0.0118199	0.295078	0.386872	0.415781	0.428637	0.989437	0.950829	0.847297	0.165762	0.646295	0.104508	0.424214	0.999752	0.484605
ENSFDAG00000000511	-1.08722	-0.00166578	0.0790737	1.36341	0.870001	0.273764	0.196407	0.508809	0.0150308	0.00735084	0.0853296	0.0917924	0.127997	0.123461	0.127462	0.989159	0.356381	3.04993e-06	0.00408464	0.444151	0.57618	0.999752	0.542219
ENSFDAG00000000512	0.518118	-1.47481	0.033455	-0.185309	0.253728	-0.178682	-0.423887	0.456555	0.0895492	0.00566816	0.117427	0.151089	0.167201	0.170135	0.4432	8.29163e-07	0.656778	0.588665	0.513913	0.662126	0.304105	0.999752	0.435839
ENSFDAG00000000517	0.127098	-0.151281	-0.00250829	-0.0526044	-0.222074	-0.00186247	0.025074	0.0248698	0.00622217	0.000294604	0.00719733	0.00942475	0.0101581	0.0104517	0.420277	0.0551305	0.883814	0.535216	0.0221658	0.985257	0.806254	0.999752	0.623623
ENSFDAG00000000518	1.16434	-0.0337547	-0.12055	-0.247846	0.284996	-0.272395	-0.150845	0.646465	0.0708472	0.00870585	0.134278	0.162631	0.194652	0.194194	0.147581	0.899086	0.196357	0.49881	0.47975	0.536969	0.732121	0.999752	0.597932
ENSFDAG00000000522	-0.164349	0.128202	0.0113392	-0.184002	0.158731	0.0627494	0.287173	0.156889	0.0250583	0.00201572	0.0370357	0.0467083	0.0530537	0.0536	0.678196	0.418009	0.800607	0.33901	0.462671	0.785293	0.214827	0.999752	0.390759
ENSFDAG00000000524	0.739824	0.125688	-0.0726191	0.4387	0.0102193	-0.454516	-0.253609	0.85359	0.095889	0.0114661	0.178601	0.216897	0.258697	0.258299	0.423269	0.684822	0.49766	0.299238	0.982493	0.371525	0.617777	0.999752	0.557644
ENSFDAG00000000528	0.593223	-0.292134	-0.0849	0.430232	0.35885	0.00690042	-0.124285	0.600082	0.0286729	0.00853639	0.105123	0.11721	0.156163	0.152064	0.443798	0.0844866	0.358145	0.184527	0.294562	0.986068	0.749941	0.999752	0.603753
ENSFDAG00000000529	-1.00139	0.0838484	0.0975395	0.125066	0.584967	-0.0233838	0.11766	0.223814	0.0389698	0.00283665	0.0546936	0.0695827	0.0781486	0.0791855	0.0342847	0.671021	0.0670443	0.592804	0.0265831	0.933336	0.675855	0.999752	0.579058
ENSFDAG00000000540	0.355025	0.0298698	-0.0372519	-0.126253	0.011576	0.0858472	0.231758	0.0975729	0.0136009	0.00127797	0.0219001	0.0272262	0.0315032	0.0316822	0.25572	0.797856	0.29739	0.393583	0.944069	0.62862	0.1929	0.999752	0.380989
ENSFDAG00000000543	0.659415	-0.55806	-0.0168441	-0.37285	-0.919205	-0.297277	0.280787	1.18305	0.153883	0.0156315	0.259295	0.319959	0.373809	0.375063	0.544344	0.154849	0.892829	0.464038	0.104153	0.626809	0.646605	0.999752	0.56858
ENSFDAG00000000544	-0.668487	0.0553263	0.0639682	0.26205	0.294677	0.378885	0.181983	0.215486	0.0440897	0.00265449	0.0564946	0.0729596	0.0803393	0.0818789	0.149848	0.792173	0.214392	0.270241	0.275296	0.181311	0.524788	0.999752	0.522886
ENSFDAG00000000548	0.539613	-0.252385	-0.0474846	-0.155717	0.229	-0.196147	0.00877717	0.23221	0.0618518	0.00271814	0.0695039	0.0912128	0.0977283	0.100997	0.262797	0.310194	0.362407	0.554754	0.448306	0.530371	0.977966	0.999752	0.670647
ENSFDAG00000000552	0.759775	-0.313775	-0.0904077	0.443256	0.0396464	0.132131	-0.10143	0.46951	0.0695816	0.0060985	0.107736	0.134814	0.154683	0.155882	0.267506	0.234236	0.246989	0.176875	0.914013	0.736904	0.797254	0.999752	0.620477
ENSFDAG00000000553	-0.207236	-0.462835	0.0479906	0.303754	-0.305023	-1.34983	1.13486	0.692963	0.176318	0.00818197	0.202338	0.26515	0.285317	0.29388	0.803401	0.270355	0.59573	0.499498	0.553608	0.0115024	0.0363111	0.999752	0.267604
ENSFDAG00000000554	0.192742	0.322736	-0.0558588	0.581648	-0.537587	0.473214	-0.205451	0.695242	0.127339	0.0087368	0.173546	0.221881	0.247605	0.251331	0.817193	0.365777	0.550102	0.16265	0.253757	0.341607	0.681944	0.999752	0.581911
ENSFDAG00000000561	1.50612	-0.0648823	-0.187238	0.683022	0.0920271	0.263866	-0.920315	0.691278	0.132356	0.00861965	0.175906	0.225837	0.250646	0.25482	0.070066	0.858454	0.0437233	0.103414	0.84645	0.598158	0.0682824	0.999752	0.294908
ENSFDAG00000000565	0.11708	-0.0240486	-0.00135396	-0.268194	-0.0539712	-0.161867	0.0169612	0.083348	0.0163597	0.00103464	0.0214441	0.0275933	0.0305331	0.0310696	0.685079	0.850862	0.966424	0.0670333	0.74525	0.354266	0.923342	0.999752	0.656417
ENSFDAG00000000569	-0.0562012	0.0622399	0.00781066	-0.0191784	0.0138477	-0.124363	-0.0627591	0.267072	0.0303386	0.00358335	0.0560683	0.0681734	0.0811833	0.0810885	0.9134	0.720844	0.896187	0.935446	0.957703	0.662493	0.825565	0.999752	0.63032
ENSFDAG00000000574	-1.10216	0.104458	0.12944	-0.559098	0.128344	0.00196736	-0.0352141	0.171728	0.036701	0.00209805	0.0459458	0.0595505	0.0652493	0.0666148	0.00782239	0.585577	0.0047144	0.0090981	0.598932	0.993855	0.891476	0.999752	0.648408
ENSFDAG00000000576	0.238565	-0.0358609	-0.0296215	-0.0567384	0.0815515	-0.0784332	-0.312109	0.476827	0.0579203	0.0063511	0.102201	0.125178	0.147661	0.147818	0.729732	0.881548	0.710123	0.859132	0.817704	0.838266	0.416913	0.999752	0.482489
ENSFDAG00000000579	-0.314403	0.122217	0.0331949	0.197103	0.546152	0.293036	0.323731	0.294206	0.0144058	0.00418097	0.0517037	0.0577694	0.0767613	0.0747901	0.562155	0.308549	0.607691	0.386037	0.0230687	0.290206	0.236509	0.999752	0.401433
ENSFDAG00000000583	-0.000907312	0.291142	-0.0216753	0.374556	-0.0441601	-0.00144697	-0.38897	0.244499	0.0381222	0.00315268	0.0571837	0.0719387	0.0819752	0.082752	0.998536	0.135928	0.699471	0.117274	0.869223	0.995968	0.176326	0.999752	0.369594
ENSFDAG00000000584	0.866436	-0.0790731	-0.138017	0.493065	0.186313	0.352558	-0.227818	1.19303	0.144633	0.0158941	0.255549	0.312934	0.369241	0.36961	0.427631	0.835292	0.273626	0.329379	0.739092	0.561782	0.707863	0.999752	0.591107
ENSFDAG00000000594	-0.342962	-0.000366409	0.0487779	-0.35112	0.165477	0.0125142	-0.0995244	0.161479	0.0388244	0.00192786	0.0457783	0.0598222	0.0647311	0.0664491	0.393398	0.998516	0.2666	0.100784	0.498685	0.960771	0.699432	0.999752	0.588014
ENSFDAG00000000596	4.21814	-1.18811	-0.349552	-0.661756	-3.20448	0.24288	0.842636	4.22746	0.546252	0.0559018	0.924505	1.13998	1.33308	1.33726	0.0402136	0.107938	0.139295	0.491298	0.00268835	0.833386	0.466202	0.999752	0.501387
ENSFDAG00000000598	0.126717	0.0839199	-0.011606	-0.312041	-0.000933658	0.0221901	0.21161	0.0896569	0.0122708	0.00117709	0.0199948	0.0248087	0.0287789	0.0289247	0.672152	0.448702	0.735152	0.0273315	0.99527	0.89593	0.213414	0.999752	0.390305
ENSFDAG00000000599	0.636954	-0.103134	-0.0644529	-0.0593468	-0.0629162	-0.14901	0.124641	0.128547	0.033504	0.00151083	0.0380222	0.0498688	0.0535394	0.0552384	0.0756427	0.573129	0.0972783	0.760858	0.778143	0.519582	0.595889	0.999752	0.549796
ENSFDAG00000000604	-0.0329821	0.120647	-0.00376443	-0.0226361	-0.0228068	-0.00367951	0.106359	0.0354208	0.00852763	0.000422769	0.0100485	0.0131321	0.0142078	0.014586	0.860886	0.191389	0.854733	0.821346	0.842247	0.975374	0.378502	0.999752	0.466596
ENSFDAG00000000605	-0.964495	0.0259021	0.129792	-0.373717	-0.206542	-0.282585	-0.201969	0.874696	0.196911	0.0105791	0.239947	0.312225	0.340162	0.348059	0.302415	0.953453	0.206985	0.445505	0.711653	0.628022	0.732095	0.999752	0.597932
ENSFDAG00000000610	-0.266353	-0.0216656	0.021373	0.240671	0.0286956	0.101414	0.122014	0.177975	0.0114713	0.00249569	0.0326445	0.037406	0.0481116	0.0472137	0.527804	0.839694	0.668776	0.182845	0.882051	0.643828	0.574434	0.999752	0.541566
ENSFDAG00000000611	0.0661217	-0.00973855	0.00310502	-0.0560092	-0.169828	-0.221193	-0.335169	0.0552352	0.0141928	0.000650944	0.0162129	0.021254	0.0228491	0.0235505	0.778447	0.93485	0.903136	0.660028	0.244059	0.143382	0.0289582	0.999752	0.258604
ENSFDAG00000000613	2.84236	-0.902186	-0.236346	-0.611517	-1.03257	-0.773606	-0.932435	0.858701	0.0909679	0.0116029	0.176623	0.213129	0.25632	0.25543	0.00215991	0.00277844	0.0282251	0.145649	0.0253098	0.126508	0.065046	0.999752	0.293939
ENSFDAG00000000617	-0.0426374	0.0646623	-0.00223588	0.117534	0.0512276	-0.161305	-0.025006	0.0321947	0.00700103	0.000392017	0.00868507	0.0112721	0.012327	0.0125941	0.812169	0.439638	0.910089	0.207244	0.629448	0.146268	0.823673	0.999752	0.629773
ENSFDAG00000000619	0.512405	-0.180193	-0.0627644	0.432904	0.222707	0.0416028	-0.648505	0.773277	0.11076	0.0100914	0.175251	0.218506	0.251883	0.253546	0.560095	0.588207	0.532106	0.301091	0.633766	0.933936	0.197777	0.999752	0.384507
ENSFDAG00000000630	-0.0766099	-0.0271088	-0.015032	1.00645	-0.112632	-0.0615397	-0.586736	0.983176	0.147864	0.0127441	0.226836	0.28429	0.325536	0.328222	0.938415	0.943797	0.894069	0.0345849	0.832699	0.914108	0.30577	0.999752	0.436361
ENSFDAG00000000631	0.53761	-1.2849	0.016488	0.0473857	0.527276	-1.97704	0.285665	0.668029	0.177937	0.00781964	0.199951	0.262404	0.281148	0.290552	0.51069	0.00231878	0.852088	0.915606	0.303326	0.000192532	0.596138	0.995714	0.549796
ENSFDAG00000000633	0.176025	-0.112541	-0.0484745	1.22876	0.529491	0.290996	0.171961	0.583417	0.0338082	0.00822732	0.105087	0.119203	0.155338	0.151996	0.817739	0.540492	0.59305	0.000150372	0.125125	0.460317	0.659158	0.999752	0.573495
ENSFDAG00000000637	0.873381	0.00399223	-0.116411	0.703677	-0.0506459	-0.0022364	-0.519021	0.652364	0.0861025	0.00860416	0.143686	0.177583	0.207047	0.207843	0.27955	0.989145	0.209483	0.0633996	0.904338	0.996078	0.254929	0.999752	0.41242
ENSFDAG00000000640	0.410522	-0.153759	-0.0349076	-0.136295	-0.12214	-0.0937912	0.177361	0.11622	0.0238367	0.00143102	0.0305035	0.0394017	0.043375	0.0442104	0.228516	0.319295	0.356124	0.435169	0.538345	0.652464	0.398937	0.999752	0.475018
ENSFDAG00000000645	0.199871	-0.101337	-0.0313048	0.326149	-0.124574	0.268621	-0.517414	0.338289	0.0326769	0.00461015	0.0678431	0.0810511	0.0987506	0.0981111	0.731116	0.575076	0.644759	0.210508	0.661698	0.392656	0.0985588	0.999752	0.320296
ENSFDAG00000000648	0.986601	-0.503799	-0.104585	-0.207908	0.36806	0.00298484	0.533885	0.54147	0.039456	0.0075372	0.101685	0.117944	0.149325	0.147059	0.179995	0.0112029	0.228334	0.514406	0.283845	0.993837	0.163862	0.999752	0.363662
ENSFDAG00000000652	-0.321901	-0.0402578	0.0348949	0.00839128	0.10284	0.18469	0.351999	0.122334	0.0237539	0.00152156	0.0313234	0.0402662	0.0446139	0.04538	0.357394	0.793934	0.371013	0.962184	0.608301	0.381903	0.0984574	0.999752	0.320296
ENSFDAG00000000654	0.166691	0.0249708	-0.00344274	-0.229027	-0.178921	-0.18368	-0.24417	0.141927	0.034027	0.00169538	0.0401773	0.0524942	0.0568181	0.0583172	0.658152	0.89232	0.933365	0.253202	0.43485	0.440955	0.311969	0.999752	0.43939
ENSFDAG00000000659	-0.286779	0.161421	0.01946	0.0118801	0.101847	0.175089	0.132559	0.0334001	0.00889652	0.000390967	0.00999716	0.0131197	0.0140568	0.014527	0.116606	0.0870077	0.32503	0.90542	0.37391	0.139736	0.27141	0.999752	0.421155
ENSFDAG00000000662	1.18643	-0.441049	-0.113836	1.58354	0.740664	-0.22767	-0.00432652	2.75578	0.195917	0.03842	0.514955	0.595808	0.756771	0.744746	0.474799	0.319037	0.5614	0.0273348	0.337281	0.793543	0.996	0.999752	0.675066
ENSFDAG00000000663	0.0614086	0.0281588	-0.0101211	-0.114017	0.0687604	0.0567042	0.319528	0.0636999	0.0101167	0.000819123	0.0150042	0.0189117	0.0214971	0.0217143	0.807765	0.779509	0.723614	0.35195	0.617073	0.698945	0.0301297	0.999752	0.258604
ENSFDAG00000000668	0.326286	-0.663551	0.0101496	-0.56482	0.170472	-0.889501	0.622444	0.771475	0.205491	0.00903053	0.230914	0.303038	0.324684	0.335544	0.710279	0.143252	0.914943	0.239836	0.756809	0.118513	0.282578	0.999752	0.426075
ENSFDAG00000000672	0.131848	0.0248623	-0.0119707	-0.0733855	-0.051409	0.0201491	0.183552	0.0349387	0.0042929	0.000464761	0.00751605	0.00921726	0.0108552	0.0108709	0.480576	0.704346	0.578709	0.397287	0.592323	0.846652	0.0783293	0.999752	0.302375
ENSFDAG00000000673	0.100922	0.00853881	0.00227893	-0.23385	-0.103072	-0.172279	-0.133551	0.190616	0.0410402	0.00232549	0.0511783	0.0663714	0.072663	0.0742063	0.817193	0.96638	0.962308	0.301278	0.689097	0.522751	0.62395	0.999752	0.559681
ENSFDAG00000000675	0.212326	-0.13685	-0.0064378	-0.152172	0.0231984	-0.0565923	0.166407	0.0825891	0.0089234	0.0011138	0.0170839	0.0206592	0.0247766	0.0247067	0.460013	0.147419	0.847037	0.244328	0.871779	0.719198	0.289746	0.999752	0.42932
ENSFDAG00000000676	-0.755892	0.0727178	0.0851527	-0.331545	0.0880041	-0.0153152	0.390487	0.113052	0.0243758	0.00137883	0.0303741	0.0393957	0.0431231	0.0440417	0.0245682	0.641388	0.0218364	0.0571252	0.657489	0.941209	0.0627873	0.999752	0.290667
ENSFDAG00000000677	-0.30281	0.472964	0.0061452	0.0451758	0.0269116	0.433676	-1.13323	0.673112	0.0713856	0.00909423	0.138493	0.167138	0.200978	0.200287	0.712064	0.0766937	0.94862	0.90338	0.947516	0.333361	0.0113358	0.999752	0.23014
ENSFDAG00000000678	0.776458	-0.212992	-0.0782498	0.263985	-0.114675	-0.112709	0.0233966	0.270435	0.0328482	0.00360209	0.0579632	0.0709939	0.0837455	0.0838344	0.135414	0.239919	0.192307	0.272866	0.666915	0.696927	0.935597	0.999752	0.659759
ENSFDAG00000000679	-0.320212	0.581096	-0.00830316	0.176203	0.70264	-1.34416	-0.812845	0.825109	0.11978	0.0107482	0.187906	0.23462	0.26996	0.271865	0.724449	0.0931486	0.936166	0.684387	0.146889	0.00968105	0.119009	0.999752	0.334559
ENSFDAG00000000690	-0.421852	0.257091	0.0372927	0.0311263	-0.161181	0.0863302	-0.0135601	0.0744032	0.0135966	0.000935357	0.0185545	0.023717	0.0264741	0.0268704	0.121972	0.0274671	0.222704	0.819251	0.29528	0.595709	0.934072	0.999752	0.659086
ENSFDAG00000000697	1.23254	0.068101	-0.136772	0.250241	-0.36393	0.0828333	-0.747466	0.579686	0.110912	0.00722911	0.147464	0.189309	0.210124	0.213618	0.105481	0.837973	0.107699	0.514626	0.40291	0.8566	0.105828	0.999752	0.323246
ENSFDAG00000000707	-3.65332	0.190812	0.366079	-0.253577	1.32995	-0.282668	-0.385737	1.03116	0.10466	0.0139898	0.20957	0.251714	0.304556	0.303072	0.000321038	0.555314	0.00196778	0.579635	0.00802932	0.608509	0.483504	0.999752	0.506839
ENSFDAG00000000708	0.310115	0.177552	-0.0591193	0.418764	-9.00989e-05	0.208768	-0.22687	0.609218	0.059398	0.00829551	0.122479	0.146471	0.178223	0.177123	0.691134	0.466296	0.516277	0.231474	0.999812	0.620941	0.589844	0.999752	0.548026
ENSFDAG00000000718	-0.409679	-0.0548357	0.034462	0.75366	-0.382613	0.84051	-0.483986	1.46823	0.20992	0.0191655	0.332534	0.414529	0.477968	0.481095	0.735287	0.904733	0.803413	0.191231	0.552333	0.224081	0.485316	0.999752	0.506979
ENSFDAG00000000719	0.543346	-0.0135429	-0.0676687	0.414465	-0.0763436	0.196261	-0.568193	0.748042	0.0987559	0.00986577	0.164774	0.203651	0.237432	0.238347	0.529858	0.965626	0.495697	0.307234	0.865661	0.687112	0.244491	0.999752	0.405578
ENSFDAG00000000722	0.64699	-0.163497	-0.040533	-0.297618	-0.128777	-0.311604	-0.81722	0.17248	0.0335388	0.00214472	0.0441913	0.0568152	0.062939	0.064023	0.119267	0.371984	0.381447	0.156845	0.589016	0.214214	0.00123892	0.999752	0.204207
ENSFDAG00000000723	0.078644	0.131093	-0.0316538	0.580718	-0.0417172	0.164272	-0.765521	0.568264	0.0856368	0.00736379	0.131207	0.164475	0.188286	0.189853	0.916911	0.654174	0.712223	0.108892	0.91807	0.705002	0.0789335	0.999752	0.302974
ENSFDAG00000000724	-0.112076	-0.00932767	0.0329091	-0.298945	-0.21551	-0.0645399	-0.39496	0.249993	0.0307497	0.00332503	0.0537973	0.0659818	0.0776951	0.0778103	0.822636	0.957578	0.568194	0.197442	0.401475	0.816893	0.156803	0.999752	0.358019
ENSFDAG00000000725	0.554491	-0.183832	-0.0523883	-0.00925923	-0.105821	-0.177092	-0.339915	0.302673	0.0526002	0.00383731	0.0739062	0.0940079	0.105606	0.107001	0.313513	0.422817	0.397715	0.97283	0.729994	0.58579	0.298736	0.999752	0.433345
ENSFDAG00000000726	-0.0859331	0.0419231	0.0199707	-0.0780725	-0.172036	0.376984	0.472355	0.327755	0.0110884	0.00471792	0.0554521	0.0601955	0.0829843	0.0802276	0.880684	0.690538	0.771244	0.740235	0.483183	0.190652	0.095384	0.999752	0.316751
ENSFDAG00000000728	1.19969	-0.506334	-0.128682	0.385558	0.116319	0.374672	0.141971	1.00367	0.118212	0.0134144	0.21305	0.260071	0.308122	0.308132	0.231114	0.140839	0.266549	0.403541	0.819577	0.499689	0.798137	0.999752	0.620775
ENSFDAG00000000729	2.69519	-1.16322	-0.285149	-0.650216	-1.46287	-0.400697	-0.752573	3.87535	0.186829	0.0551083	0.679671	0.758396	1.00945	0.983162	0.17097	0.00712054	0.224487	0.430291	0.0929967	0.690028	0.447858	0.999752	0.494116
ENSFDAG00000000730	-0.231401	-0.0321193	0.0619658	-0.682037	-0.341024	-1.12599	-0.72838	1.35832	0.197706	0.0176876	0.309634	0.386718	0.444807	0.447985	0.842617	0.942414	0.641268	0.220312	0.583425	0.0913546	0.276488	0.999752	0.423072
ENSFDAG00000000738	-0.258844	0.368116	0.00101985	0.3695	-0.343735	0.610121	-0.185886	0.420602	0.06851	0.00538774	0.100055	0.126441	0.143244	0.144815	0.689806	0.159607	0.988914	0.242749	0.333706	0.106952	0.625216	0.999752	0.559951
ENSFDAG00000000740	2.54871	-0.89258	-0.224493	0.412177	-0.650646	-1.4302	0.154607	1.7266	0.221896	0.0228467	0.376912	0.464486	0.543579	0.545183	0.0524218	0.0581139	0.137485	0.501983	0.339739	0.052399	0.834143	0.999752	0.632147
ENSFDAG00000000741	-0.577168	0.0953935	0.0596417	-0.0107112	0.0438538	0.0144449	0.183289	0.056777	0.0151232	0.000664605	0.0169942	0.0223022	0.0238953	0.0246945	0.0154255	0.437923	0.0206956	0.934515	0.769023	0.92555	0.243464	0.999752	0.404975
ENSFDAG00000000742	-0.268355	-0.0200781	0.0253713	0.152633	-0.00541633	0.124818	0.222586	0.0707451	0.0188438	0.000828109	0.0211751	0.0277889	0.0297739	0.0307698	0.313007	0.883713	0.377964	0.294223	0.97408	0.469455	0.204469	0.999752	0.387146
ENSFDAG00000000743	0.38458	0.00825757	-0.0300715	-0.433916	0.140856	0.106324	0.0530717	0.357078	0.0474888	0.00470511	0.0788511	0.097533	0.113595	0.114061	0.519845	0.969773	0.661096	0.122284	0.651972	0.752408	0.875132	0.999752	0.644217
ENSFDAG00000000749	0.218623	-0.0639988	-0.0383707	0.529442	0.236829	0.0613073	-0.219759	0.245038	0.0479981	0.0030429	0.0629868	0.0810334	0.0896888	0.091258	0.658742	0.770196	0.486683	0.0348954	0.405431	0.837797	0.466942	0.999752	0.501438
ENSFDAG00000000763	-0.161109	-0.0989698	0.0322388	0.0465842	-0.16956	-0.119613	-0.390412	0.140145	0.0330622	0.00167944	0.0393496	0.0513631	0.0556852	0.0571062	0.666935	0.586236	0.43147	0.814335	0.454359	0.612235	0.102315	0.999752	0.321054
ENSFDAG00000000766	0.702934	0.0312867	-0.110357	0.422129	-0.0430352	0.255092	-0.255502	0.36325	0.0430533	0.0048516	0.0772581	0.094374	0.111711	0.111738	0.243491	0.880146	0.113107	0.128837	0.888591	0.445334	0.444659	0.999752	0.49304
ENSFDAG00000000769	-0.101936	0.0765732	0.0131133	-0.163107	-0.0753309	-0.0851501	0.198447	0.0794747	0.00980758	0.00105666	0.0171206	0.0210056	0.0247233	0.0247626	0.717659	0.4394	0.686649	0.212558	0.603229	0.588134	0.207275	0.999752	0.388032
ENSFDAG00000000780	-0.201808	0.0771309	0.0208692	-0.106047	-0.134677	-0.144562	-0.0562044	0.0529823	0.00722618	0.000695908	0.0118016	0.0146374	0.0169881	0.0170722	0.380624	0.364222	0.428886	0.328975	0.265636	0.267373	0.667082	0.999752	0.576026
ENSFDAG00000000781	0.59834	0.0736876	-0.0830327	0.0136963	-0.275358	0.275629	0.116588	0.618474	0.0662383	0.00834801	0.12761	0.154168	0.185124	0.184548	0.446759	0.774639	0.363468	0.969416	0.483119	0.521777	0.786089	0.999752	0.61676
ENSFDAG00000000786	0.00755007	-0.0617537	-0.00521656	0.0295265	0.12885	0.0305474	0.103245	0.0408398	0.00691864	0.000519919	0.00986881	0.0125211	0.0141124	0.0142862	0.970198	0.457829	0.819041	0.766297	0.249526	0.797069	0.387698	0.999752	0.470212
ENSFDAG00000000787	0.201919	0.0135246	-0.0318655	0.198114	0.0661744	-0.0236194	0.178026	0.0591462	0.0144838	0.000703586	0.0169266	0.0221416	0.0239146	0.0245744	0.406393	0.910523	0.229623	0.12782	0.656523	0.878608	0.256106	0.999752	0.413161
ENSFDAG00000000793	0.498253	-0.0931796	-0.0518415	0.0166766	-0.006685	-0.0389606	-0.222082	0.0629745	0.0116886	0.000789553	0.0158095	0.0202383	0.0225473	0.0228973	0.0470901	0.388761	0.0650432	0.894484	0.96252	0.795277	0.142201	0.999752	0.349488
ENSFDAG00000000800	-0.666895	0.295241	0.0575755	0.0461534	-0.113922	0.432577	-0.0277693	0.211432	0.0507393	0.00252517	0.0598824	0.0782445	0.0846812	0.0869199	0.146962	0.189957	0.251896	0.850402	0.683812	0.137142	0.924958	0.999752	0.657
ENSFDAG00000000805	0.0932267	-0.0601715	-0.0064772	-0.125343	-0.0474792	0.0379069	0.131461	0.0570948	0.0152079	0.000668326	0.0170893	0.022427	0.024029	0.0248328	0.696419	0.6256	0.802163	0.33765	0.751211	0.806812	0.404154	0.999752	0.477538
ENSFDAG00000000809	0.109916	-0.137244	-0.0413539	0.906943	0.651681	0.0913015	0.0408399	0.414431	0.0272175	0.00580528	0.0762756	0.087561	0.112355	0.110317	0.864429	0.405468	0.587297	0.00102389	0.027643	0.785327	0.902139	0.999752	0.650999
ENSFDAG00000000810	-1.44798	-0.37964	0.185526	-0.0698512	0.0923208	-0.372374	-0.402234	0.611087	0.0743829	0.00813748	0.131064	0.160566	0.18935	0.189564	0.0639823	0.163926	0.0397198	0.847003	0.817785	0.392136	0.355565	0.999752	0.455528
ENSFDAG00000000816	0.764269	-0.542175	-0.0852576	0.422635	0.763547	0.0909798	0.511568	0.321128	0.0228052	0.00447735	0.0599942	0.0694063	0.0881695	0.0867657	0.177442	0.000330378	0.202608	0.08444	0.00375246	0.759302	0.0824373	0.999752	0.307215
ENSFDAG00000000818	-0.109595	0.245075	-0.0172021	-0.263361	0.0466325	0.86666	1.23006	0.247299	0.0628713	0.00292038	0.0721773	0.0945803	0.101782	0.104831	0.825572	0.328371	0.750244	0.326947	0.879478	0.00659715	0.00014522	0.999752	0.179077
ENSFDAG00000000821	0.353198	-0.171109	-0.0318743	0.133434	-0.0415615	-0.275786	0.110012	0.102207	0.0272241	0.00119639	0.0305922	0.0401474	0.0430152	0.0444539	0.269253	0.299717	0.35678	0.445531	0.835677	0.183609	0.601826	0.999752	0.55162
ENSFDAG00000000823	-0.584855	-0.112369	0.07301	-0.147925	0.190663	-0.0637575	0.102757	0.173601	0.0462406	0.00203209	0.0519613	0.068191	0.073062	0.0755057	0.16041	0.601282	0.105316	0.51638	0.465307	0.813528	0.708436	0.999752	0.591107
ENSFDAG00000000825	0.573388	-0.101912	-0.0578061	0.118726	-0.0104321	0.0598573	-0.236239	0.332775	0.0505785	0.00430696	0.0770807	0.0967112	0.110584	0.111536	0.320237	0.650441	0.378414	0.668916	0.97324	0.857153	0.479339	0.999752	0.505316
ENSFDAG00000000833	-0.0491223	0.0395462	-0.0022572	0.155569	0.0931989	0.247441	0.209099	0.0702294	0.0104788	0.000911345	0.0161555	0.0202306	0.0231907	0.0233758	0.852946	0.699258	0.940398	0.220972	0.512307	0.104194	0.171427	0.999752	0.367418
ENSFDAG00000000840	0.674714	-0.42133	-0.0540713	0.01352	0.210997	-0.647358	-0.283676	0.145388	0.0279404	0.00181166	0.0370567	0.0475915	0.0527959	0.0536823	0.0768071	0.011715	0.203955	0.944008	0.333449	0.00484184	0.220818	0.999752	0.394401
ENSFDAG00000000841	-0.984228	-0.1375	0.117851	-0.123775	-0.067288	0.0649189	0.275466	0.255386	0.0582779	0.00308056	0.0705263	0.0918577	0.0999328	0.102316	0.0514642	0.568965	0.0337259	0.641161	0.824303	0.83729	0.389137	0.999752	0.470785
ENSFDAG00000000842	1.60654	-0.250718	-0.14941	-0.0646362	-1.05248	0.167119	-0.66072	0.952633	0.232279	0.0113419	0.27202	0.355746	0.384398	0.394907	0.0997645	0.602915	0.160637	0.901371	0.0776338	0.787508	0.293073	0.999752	0.431006
ENSFDAG00000000844	-0.37957	2.0237e-05	0.0446172	-0.0664601	0.0294711	-0.0982009	0.110664	0.0855124	0.0227772	0.00100097	0.0255951	0.0335895	0.0359889	0.0371926	0.194285	0.999893	0.15847	0.677838	0.872249	0.604707	0.566088	0.999752	0.538663
ENSFDAG00000000846	0.179273	0.0914079	-0.0212815	-0.0825818	-0.0354663	0.0951884	0.0417189	0.0760877	0.010777	0.000994458	0.017175	0.0213885	0.0246937	0.0248474	0.515746	0.378583	0.49977	0.528604	0.808387	0.544683	0.791269	0.999752	0.618219
ENSFDAG00000000849	1.1205	0.00558433	-0.116072	-0.0130167	-0.139469	-0.207168	-0.437104	0.261983	0.0448626	0.00332944	0.0635851	0.080761	0.0908976	0.0920511	0.0285856	0.978966	0.0442613	0.958831	0.62359	0.491994	0.149672	0.999752	0.353076
ENSFDAG00000000851	1.01431	-0.100792	-0.103275	-0.142181	-0.0247372	0.407122	0.477192	0.153193	0.0174174	0.00205522	0.0321693	0.0391183	0.0465778	0.0465247	0.00955539	0.445034	0.0227225	0.427938	0.900466	0.0592403	0.0269432	0.999752	0.256733
ENSFDAG00000000853	0.579603	0.0731192	-0.0731505	0.243789	-0.117934	-0.12203	-0.000165375	0.187896	0.0330722	0.00237716	0.0461228	0.0587414	0.0658814	0.0667804	0.181182	0.687634	0.133528	0.256309	0.626545	0.634481	0.999489	0.999752	0.67531
ENSFDAG00000000857	0.208457	-0.0489578	-0.0113078	-0.15131	-0.00312101	-0.305587	0.0241579	0.0484699	0.00899605	0.000607704	0.012168	0.0155765	0.0173538	0.0176232	0.343716	0.605733	0.646447	0.170157	0.980049	0.0203555	0.855601	0.999752	0.63729
ENSFDAG00000000859	-0.416623	0.101541	0.0519453	-0.35059	0.196133	-0.236572	0.257344	0.172166	0.0361796	0.00211018	0.0456994	0.0591505	0.0649342	0.0662479	0.315339	0.593455	0.258138	0.101005	0.419989	0.353209	0.317391	0.999752	0.441345
ENSFDAG00000000862	0.643719	-0.294807	-0.0492329	0.116558	-0.223496	-0.0628678	-0.584006	0.179843	0.0390768	0.00219019	0.0484969	0.0629388	0.0688351	0.0703241	0.129033	0.135871	0.2928	0.596613	0.373004	0.810625	0.0276482	0.999752	0.257013
ENSFDAG00000000864	-0.285281	-0.20943	0.0120888	0.655626	0.282689	0.142561	0.0913698	0.269707	0.0318022	0.00360426	0.057271	0.0699197	0.0828247	0.0828307	0.582784	0.240241	0.840417	0.00615119	0.285034	0.620347	0.750884	0.999752	0.604196
ENSFDAG00000000865	-0.234411	0.0208355	0.0288833	-0.130452	0.100337	-0.135578	-0.173621	0.0422728	0.00507382	0.00056381	0.00902637	0.0110412	0.0130464	0.013055	0.25424	0.769899	0.223829	0.169729	0.339633	0.235234	0.128624	0.999752	0.341675
ENSFDAG00000000866	1.35338	-0.555189	-0.0849527	-0.6907	0.0310766	0.228202	-0.424098	0.912391	0.0715378	0.0126384	0.174015	0.203356	0.254971	0.251657	0.156522	0.037918	0.449848	0.097771	0.945058	0.651316	0.397889	0.999752	0.475018
ENSFDAG00000000870	1.43694	-0.486043	-0.155763	0.630879	0.0451146	-0.368852	-0.143264	0.78928	0.128876	0.0101066	0.187938	0.237559	0.269044	0.272017	0.105788	0.175766	0.121287	0.145599	0.926252	0.477012	0.783557	0.999752	0.616492
ENSFDAG00000000879	0.725467	0.343657	-0.0915303	0.0206751	-0.906895	0.733849	-0.519027	0.402123	0.10711	0.00470707	0.120362	0.157955	0.169238	0.174899	0.252611	0.293695	0.18217	0.952479	0.0224973	0.0744488	0.21458	0.999752	0.390704
ENSFDAG00000000880	0.15772	0.0983636	-0.0207263	0.0592137	-0.0467829	-0.116063	-0.429986	0.0782452	0.015399	0.000970824	0.0201552	0.0259409	0.0286956	0.0292027	0.572862	0.427974	0.505924	0.676613	0.77146	0.493249	0.0118633	0.999752	0.230215
ENSFDAG00000000881	-1.08531	0.125077	0.120672	-0.186886	0.0887808	0.168155	-0.100223	0.0475735	0.0126718	0.000556874	0.0142395	0.018687	0.0200219	0.0206916	6.49434e-07	0.266519	3.1603e-07	0.117317	0.516044	0.234681	0.485964	0.999752	0.507171
ENSFDAG00000000882	0.514167	-0.147916	-0.0741663	0.426526	0.137537	0.0458331	-0.103812	0.413563	0.0277103	0.00578641	0.0763998	0.087876	0.112472	0.110495	0.423984	0.37423	0.329563	0.122802	0.642673	0.891296	0.75481	0.999752	0.605589
ENSFDAG00000000885	0.979841	-0.125771	-0.120224	0.244702	-0.101894	0.171732	-0.417717	0.796077	0.111002	0.0104263	0.178698	0.222165	0.257054	0.258518	0.272121	0.705803	0.239032	0.56268	0.828849	0.734822	0.411329	0.999752	0.480496
ENSFDAG00000000886	-1.52339	-0.883627	0.243971	-0.657876	0.131943	0.139588	-0.956885	2.73593	0.0834969	0.0394935	0.459688	0.495546	0.689174	0.665102	0.357052	0.0022284	0.219577	0.33189	0.851322	0.86647	0.240669	0.999752	0.403106
ENSFDAG00000000891	0.405301	-0.171451	-0.0521379	0.520066	0.337339	0.194168	-0.827351	0.741963	0.12594	0.00944276	0.179434	0.227703	0.256576	0.259753	0.637977	0.629007	0.591584	0.219545	0.479604	0.701477	0.104517	0.999752	0.322669
ENSFDAG00000000896	-0.354323	-0.147602	0.0353019	0.376803	0.0500472	0.149443	-0.0626227	0.214185	0.021983	0.00290286	0.0436647	0.0525089	0.0634324	0.0631464	0.443911	0.319485	0.512328	0.0713534	0.827113	0.552939	0.803202	0.999752	0.622634
ENSFDAG00000000901	-0.0146051	0.0727299	0.00740832	0.0638937	-0.180512	0.0241973	-0.719794	0.373549	0.0575315	0.00482542	0.0869579	0.109255	0.124704	0.125834	0.980935	0.761721	0.915068	0.828464	0.584987	0.94537	0.0424451	0.999752	0.272404
ENSFDAG00000000904	0.784845	-0.331352	-0.0691842	0.610146	-0.315629	0.778096	-0.3973	1.00311	0.170426	0.0127644	0.242682	0.307994	0.347005	0.351314	0.43326	0.422181	0.5403	0.215511	0.56954	0.186539	0.502665	0.999752	0.513267
ENSFDAG00000000906	0.00825765	0.102595	0.000259431	-0.145552	-0.10645	-0.0421366	0.165164	0.0826713	0.0137025	0.00105612	0.0198025	0.0250692	0.0283358	0.0286635	0.977088	0.380787	0.993631	0.300981	0.50138	0.802341	0.329286	0.999752	0.44533
ENSFDAG00000000909	0.172793	0.000277313	-0.00582565	-0.0841432	-0.147751	-0.0863557	-0.28889	0.185612	0.0326107	0.00234896	0.0455275	0.0579729	0.0650346	0.0659179	0.688366	0.998775	0.904324	0.693323	0.539449	0.734892	0.260503	0.999752	0.415497
ENSFDAG00000000911	-0.188247	0.0997236	-0.0227576	0.898053	0.151714	0.200491	0.646099	0.519144	0.068138	0.00685182	0.114128	0.140967	0.164484	0.165086	0.793887	0.702435	0.783369	0.00785333	0.686154	0.621061	0.111796	0.999752	0.326103
ENSFDAG00000000913	-1.15065	0.653586	0.0985115	-0.304151	0.00822398	0.295024	0.129223	0.194789	0.0360893	0.00244297	0.0488632	0.0625406	0.0696915	0.070769	0.00913096	0.000580779	0.0462512	0.168841	0.973766	0.263759	0.62714	0.999752	0.56061
ENSFDAG00000000917	-0.52226	0.21439	-0.0739222	3.13867	2.22736	0.57978	0.436177	7.57707	0.218081	0.109538	1.26894	1.3628	1.90425	1.83602	0.849521	0.64617	0.82326	0.00533176	0.0563931	0.674378	0.747527	0.999752	0.603492
ENSFDAG00000000919	0.39665	-0.0648542	-0.0355298	-0.126805	-0.0673211	-0.080833	-0.0766528	0.0733348	0.0176028	0.000875812	0.0207725	0.0271424	0.0293746	0.0301516	0.142999	0.62497	0.229918	0.378957	0.682814	0.63719	0.658893	0.999752	0.573495
ENSFDAG00000000921	-0.28799	0.557425	0.00159883	-0.0413617	0.0214247	0.239326	0.011083	0.151798	0.0313017	0.00186721	0.0399405	0.051615	0.0567847	0.0578903	0.459805	0.00162897	0.970485	0.836039	0.924868	0.315221	0.96326	0.999752	0.666692
ENSFDAG00000000925	0.643782	-0.504011	-0.0252506	-0.705616	0.0438213	-0.697748	-0.0382378	0.521364	0.137397	0.00611493	0.155141	0.203545	0.218301	0.225414	0.37261	0.173917	0.746766	0.0732213	0.922623	0.135337	0.935809	0.999752	0.6598
ENSFDAG00000000929	-0.0960115	0.0900186	0.0124355	-0.0965965	-0.0328133	-0.0862822	-0.273001	0.0628553	0.0157489	0.000744364	0.0182044	0.0238399	0.0256911	0.0264361	0.70175	0.473182	0.648537	0.474032	0.831702	0.590365	0.0931411	0.999752	0.31314
ENSFDAG00000000930	0.214406	-0.0838975	-0.0269717	0.150291	-0.104102	-0.165676	-0.13909	0.279839	0.039703	0.00365664	0.0632049	0.0787251	0.0908695	0.0914402	0.685253	0.673716	0.655573	0.549973	0.71062	0.58259	0.64554	0.999752	0.568083
ENSFDAG00000000933	-0.332088	0.0243786	0.0382842	-0.150145	0.0531008	0.0343463	0.111715	0.0402314	0.0101847	0.000475488	0.0117156	0.0153493	0.0165247	0.017015	0.0977909	0.809117	0.0791396	0.16539	0.668211	0.789326	0.391758	0.999752	0.472089
ENSFDAG00000000935	0.967189	-0.342118	-0.0912179	-0.413595	0.505437	-1.10011	0.808539	0.726435	0.193495	0.00850331	0.217433	0.285346	0.305729	0.315955	0.256466	0.436715	0.322563	0.375091	0.344048	0.0466332	0.150312	0.999752	0.353196
ENSFDAG00000000936	0.136437	-0.0507003	-0.0112436	0.108056	-0.133779	0.0210622	-0.484077	0.216913	0.0313192	0.00282769	0.049302	0.0615232	0.0708429	0.0713297	0.769563	0.774505	0.832543	0.626506	0.589647	0.936927	0.0699085	0.999752	0.295833
ENSFDAG00000000937	-0.280062	-0.074739	0.0496906	-0.030458	0.29896	-0.940215	-0.989727	0.24017	0.0453049	0.00300265	0.0607181	0.0778454	0.0865542	0.0879485	0.56768	0.725487	0.364501	0.901627	0.283939	0.00139431	0.000845826	0.999752	0.199774
ENSFDAG00000000939	-0.00557578	-0.0612369	0.01094	-0.2242	0.0977996	-0.226121	-0.0103831	0.110034	0.0204862	0.00137883	0.0276603	0.0354191	0.0394451	0.0400619	0.986589	0.668767	0.768285	0.177641	0.603301	0.254899	0.958628	0.999752	0.665523
ENSFDAG00000000940	0.467429	0.476565	-0.0800618	0.197145	-0.0683309	0.621682	-0.128217	0.692217	0.125954	0.0087086	0.172307	0.220158	0.245884	0.249527	0.574241	0.179332	0.390932	0.634833	0.884214	0.209941	0.797428	0.999752	0.620517
ENSFDAG00000000942	-0.62219	-0.052008	0.0465113	0.193335	0.35544	0.0784644	-0.416046	0.322039	0.0474345	0.00418658	0.07373	0.0922014	0.105879	0.106678	0.272904	0.811266	0.472243	0.476456	0.241771	0.809447	0.20273	0.999752	0.385982
ENSFDAG00000000951	-0.306552	0.132638	0.036781	-0.248607	-0.0159393	0.132812	-0.00438259	0.17599	0.0367072	0.00216012	0.0465515	0.0602161	0.0661604	0.0674789	0.46494	0.488751	0.428723	0.249219	0.94821	0.605614	0.986539	0.999752	0.672682
ENSFDAG00000000956	-0.260055	-0.187478	0.0216861	-0.0344004	0.0341687	0.00794203	0.14915	0.160798	0.0185299	0.00215419	0.0339044	0.0412889	0.0490687	0.0490347	0.516647	0.168435	0.640328	0.851798	0.866461	0.971399	0.500595	0.999752	0.512763
ENSFDAG00000000957	0.379865	-0.174262	-0.0208619	0.141191	-0.618401	-0.484724	0.162169	0.96381	0.19699	0.0118752	0.252561	0.326139	0.359171	0.366039	0.698807	0.694595	0.848181	0.778751	0.278874	0.418627	0.788666	0.999752	0.617367
ENSFDAG00000000959	-0.797837	0.296317	0.0767251	-0.200461	0.120521	-0.125895	-0.00286445	0.0904792	0.018862	0.00111066	0.0239271	0.0309493	0.0340065	0.0346835	0.00799203	0.0309622	0.0213228	0.194996	0.493298	0.4948	0.987728	0.999752	0.672991
ENSFDAG00000000960	-0.0952016	0.0053833	0.0100723	0.292158	0.0678004	-0.0429038	-0.5936	0.672604	0.178886	0.00787538	0.201154	0.263973	0.282869	0.292295	0.907588	0.989845	0.909635	0.514782	0.895014	0.935706	0.272226	0.999752	0.421426
ENSFDAG00000000961	-0.198816	0.00959888	0.0174667	-0.0168465	-0.0135202	-0.0602105	0.148932	0.0546172	0.00568807	0.00073921	0.01118	0.0134657	0.0162336	0.0161682	0.394925	0.898724	0.520593	0.873411	0.907247	0.636521	0.24149	0.999752	0.403746
ENSFDAG00000000962	-0.150564	-0.003144	0.0128314	-0.0756472	-0.000550223	0.112122	0.386322	0.0996425	0.0132332	0.00131319	0.0219929	0.0271995	0.0316849	0.0318133	0.633377	0.978196	0.723274	0.609984	0.997338	0.528768	0.0303165	0.999752	0.258813
ENSFDAG00000000963	5.22959	-0.639885	-0.55866	-0.417089	-2.27201	2.63398	1.23194	6.36737	0.869257	0.0836236	1.41877	1.75987	2.04222	2.0524	0.0382221	0.49251	0.0533727	0.726214	0.0867755	0.0653072	0.389832	0.999752	0.471058
ENSFDAG00000000964	-0.204163	0.0708903	0.0258782	-0.252677	0.0304576	-0.0329067	-0.0740385	0.0435494	0.0104339	0.000520285	0.0123239	0.0161013	0.0174288	0.017888	0.327911	0.487678	0.256575	0.0228401	0.810307	0.803161	0.579869	0.999752	0.544009
ENSFDAG00000000965	-1.0664	0.289951	0.108559	-0.0755567	-0.154741	0.173363	0.227716	0.0428856	0.0114231	0.000501999	0.0128363	0.0168456	0.0180489	0.0186526	2.61183e-07	0.00666984	1.26466e-06	0.504844	0.233169	0.196904	0.0954479	0.999752	0.316751
ENSFDAG00000000974	-1.40086	0.137631	0.151139	-0.0546707	0.105043	-0.028717	0.389249	0.119247	0.0317628	0.00139585	0.0356924	0.0468406	0.0501865	0.0518651	4.97771e-05	0.439966	5.22399e-05	0.772292	0.627426	0.898001	0.0874157	0.999752	0.31133
ENSFDAG00000000975	-0.692456	-0.0108652	0.084867	-0.339377	-0.00440934	0.118124	-0.250776	0.438096	0.059226	0.00576077	0.0972864	0.120549	0.14008	0.140732	0.295477	0.96439	0.263505	0.276565	0.989867	0.752298	0.503826	0.999752	0.513949
ENSFDAG00000000985	-0.0998886	-0.167	0.0129216	-0.0124503	0.350899	0.0906815	0.028042	0.17459	0.00978676	0.00246609	0.0312833	0.0353765	0.0462838	0.0452483	0.81106	0.0913933	0.794708	0.943882	0.0620938	0.673386	0.89512	0.999752	0.648935
ENSFDAG00000000989	-0.553846	0.196046	0.0236427	0.424219	0.582647	0.433124	-0.429254	0.292288	0.0518035	0.00369361	0.0719549	0.091703	0.102759	0.104186	0.305631	0.389048	0.697262	0.113771	0.0543498	0.176649	0.18356	0.999752	0.375724
ENSFDAG00000000992	-0.107932	-0.118826	0.00641548	0.119076	0.0828119	0.258499	0.424317	0.0500331	0.0125448	0.000592438	0.014496	0.0189841	0.020457	0.0210511	0.629432	0.288728	0.792106	0.32266	0.547819	0.0707108	0.00344997	0.999752	0.204207
ENSFDAG00000000996	-0.652374	0.133978	0.0411347	0.420824	0.51471	0.534302	0.46203	0.297073	0.079129	0.00347741	0.0889185	0.116691	0.125027	0.129209	0.231338	0.633873	0.485454	0.158171	0.131873	0.13077	0.198667	0.999752	0.38486
ENSFDAG00000000997	-0.503647	0.126747	0.0417569	0.0148682	0.176358	0.010852	0.141213	0.145528	0.0164786	0.00195324	0.0305223	0.0370991	0.044199	0.0441426	0.186755	0.323463	0.344749	0.932179	0.359868	0.958833	0.50151	0.999752	0.51297
ENSFDAG00000000998	-0.0717922	0.016983	0.0116516	-0.169566	0.0186526	-0.145099	0.0176751	0.0964169	0.0106433	0.00129748	0.0200695	0.0243264	0.0290864	0.0290248	0.817154	0.869245	0.746339	0.231332	0.904807	0.394888	0.91737	0.999752	0.655013
ENSFDAG00000001001	1.1049	-0.412181	-0.133892	0.377417	0.116871	0.0951186	0.318837	1.12168	0.216942	0.0139611	0.286702	0.368423	0.408397	0.415349	0.296832	0.376186	0.257142	0.480894	0.847315	0.881679	0.620796	0.999752	0.558496
ENSFDAG00000001006	-0.943609	0.270742	0.0611259	1.22664	0.286531	0.585937	0.775479	1.53183	0.339626	0.0185821	0.417106	0.542145	0.591627	0.604949	0.445817	0.642236	0.653856	0.0575248	0.697167	0.446194	0.318747	0.999752	0.441411
ENSFDAG00000001008	-0.250628	0.115867	0.0259252	-0.0933461	-0.0479441	-0.0604178	0.232265	0.122269	0.0199751	0.0015655	0.0291199	0.0368105	0.0416862	0.0421476	0.473524	0.41232	0.512317	0.584367	0.802672	0.767294	0.257907	0.999752	0.41409
ENSFDAG00000001015	-0.675839	0.629725	0.0375326	0.0364915	0.437801	-0.04574	-0.986801	0.468005	0.0710563	0.00605811	0.108361	0.135942	0.155465	0.156798	0.323196	0.0181581	0.629654	0.911731	0.235067	0.907648	0.0127003	0.999752	0.232647
ENSFDAG00000001016	0.191311	-0.11316	-0.0345016	0.426587	0.227407	0.163009	-0.278726	0.235504	0.0343817	0.00306537	0.053743	0.0671439	0.0771977	0.0777571	0.693417	0.541675	0.533182	0.0657505	0.380156	0.55741	0.317524	0.999752	0.441345
ENSFDAG00000001020	-0.11366	-0.114662	-0.0210372	0.672129	0.267406	0.814773	0.885813	0.837231	0.081527	0.0114015	0.168263	0.201197	0.244856	0.243334	0.901142	0.687996	0.843813	0.101308	0.55107	0.0996453	0.0725374	0.999752	0.298915
ENSFDAG00000001021	-0.097442	-0.0291821	0.007738	-0.0449662	0.131751	-0.0470584	0.217329	0.113606	0.0103888	0.00155543	0.0224644	0.0266806	0.0327563	0.0324868	0.772506	0.774642	0.844452	0.764168	0.419901	0.794856	0.227905	0.999752	0.396825
ENSFDAG00000001022	-0.0124696	0.236191	-0.0119814	-0.0344481	-0.0720448	0.371814	0.00707254	0.372556	0.0436937	0.00498163	0.0789789	0.0963653	0.114238	0.114226	0.983701	0.258503	0.865203	0.902442	0.816474	0.271302	0.983304	0.999752	0.671914
ENSFDAG00000001023	1.26784	-0.263415	-0.140789	0.160156	-0.0545243	-0.0756824	-0.767262	0.833508	0.0951041	0.0111781	0.175218	0.213151	0.253669	0.25341	0.164922	0.393015	0.18298	0.702011	0.905989	0.880555	0.127467	0.999752	0.341013
ENSFDAG00000001028	0.18815	0.075426	-0.0326163	0.43766	-0.139902	-0.00600292	-0.925407	0.275769	0.0504135	0.00346659	0.0687816	0.0879221	0.0981385	0.0996088	0.720128	0.736924	0.579602	0.0951595	0.637056	0.984712	0.00336641	0.999752	0.204207
ENSFDAG00000001030	1.76957	-1.07616	-0.098857	-0.763612	0.126833	-1.10465	-0.766358	0.826471	0.142974	0.0104859	0.201428	0.256098	0.287863	0.291618	0.0515947	0.00442592	0.334348	0.0888628	0.802102	0.0395057	0.155859	0.999752	0.357626
ENSFDAG00000001031	-0.363863	-0.284992	0.0608273	-0.10403	-0.289836	-0.0753887	0.361731	0.329798	0.0848602	0.00388562	0.0968761	0.127004	0.136518	0.140722	0.526343	0.327917	0.329155	0.738204	0.416055	0.838324	0.334903	0.999752	0.448287
ENSFDAG00000001032	-0.0318334	0.0549022	0.00274394	-0.113174	0.0849273	-0.0698378	0.121084	0.161417	0.0295153	0.00202904	0.0402641	0.0514698	0.0574489	0.0583101	0.936847	0.749294	0.951426	0.572748	0.708148	0.770766	0.616065	0.999752	0.556906
ENSFDAG00000001036	0.000525826	0.0325886	-0.0174443	0.619449	0.028429	0.0268782	-0.395131	0.328599	0.0736091	0.00397812	0.0899241	0.11697	0.127504	0.130434	0.999268	0.904391	0.782105	0.0388566	0.933753	0.939998	0.273924	0.999752	0.422253
ENSFDAG00000001037	0.271929	-0.0609791	-0.0222199	0.16098	0.121141	-0.236525	-0.359173	0.0881715	0.018949	0.00107606	0.0236526	0.0306699	0.033584	0.0342947	0.359782	0.657778	0.498174	0.295227	0.489107	0.196822	0.0524398	0.999752	0.280837
ENSFDAG00000001038	-0.639939	0.105455	0.0680629	0.00703561	0.158104	0.022587	-0.176552	0.0696498	0.018552	0.000815289	0.0208472	0.0273587	0.029313	0.0302934	0.0153163	0.438794	0.0171387	0.961136	0.339143	0.895043	0.310404	0.999752	0.438578
ENSFDAG00000001039	-0.618212	0.0483096	0.0543881	-0.0185683	0.336081	0.178197	0.339864	0.216424	0.0343977	0.0027827	0.0509924	0.0642774	0.0730574	0.0737974	0.183889	0.794496	0.302527	0.934465	0.18497	0.509719	0.210906	0.999752	0.389554
ENSFDAG00000001040	1.44106	-0.125115	-0.11498	0.504441	-0.504838	0.301805	-0.455895	1.19673	0.125887	0.0161814	0.245659	0.296207	0.356588	0.355267	0.187738	0.724367	0.366056	0.308793	0.353622	0.613271	0.444349	0.999752	0.49304
ENSFDAG00000001045	-4.43962	1.98103	0.382724	0.264369	0.657309	0.596514	-1.17271	1.8559	0.332042	0.0234157	0.458688	0.585113	0.654874	0.664186	0.00111854	0.000586216	0.0123808	0.69628	0.39017	0.461046	0.150166	0.999752	0.353195
ENSFDAG00000001047	0.588066	0.31315	-0.0620603	0.0841433	-0.52078	0.0758583	-0.626974	0.298989	0.0494865	0.00382041	0.0715773	0.090601	0.102426	0.103605	0.282164	0.159221	0.31535	0.753135	0.0836008	0.812635	0.0514312	0.999752	0.279946
ENSFDAG00000001051	0.712939	-0.905094	-0.0350111	-0.0617056	-0.0296016	-0.116801	0.00864698	0.166576	0.0324342	0.0020708	0.0427041	0.0549098	0.0608184	0.0618689	0.0806698	5.01722e-07	0.441671	0.765245	0.899475	0.635772	0.972268	0.999752	0.669553
ENSFDAG00000001057	0.294996	0.140975	-0.0473642	0.313771	0.0925312	0.164672	-0.596723	0.373146	0.0528769	0.00487667	0.0842428	0.104915	0.12112	0.121876	0.629151	0.539832	0.497614	0.279673	0.775129	0.636097	0.0873987	0.999752	0.31133
ENSFDAG00000001060	-1.26517	-0.684277	0.151115	0.765032	-0.213645	0.0725957	0.626954	0.286033	0.0568113	0.00354299	0.0739836	0.0952991	0.105304	0.107202	0.0180009	0.00409334	0.0111245	0.00491387	0.488894	0.822982	0.0555116	0.999752	0.284494
ENSFDAG00000001073	0.262785	-0.00332567	-0.0261041	0.0505621	0.042063	-0.221111	-0.437041	0.104228	0.020535	0.00129295	0.0268614	0.0345755	0.0382421	0.0389196	0.415663	0.981485	0.467858	0.757699	0.821037	0.25819	0.0267373	0.999752	0.256243
ENSFDAG00000001076	0.228628	0.0402732	-0.0294532	0.173891	-0.0470237	0.0210188	-0.21108	0.0789391	0.0125977	0.00101434	0.0186286	0.0234918	0.0266862	0.0269602	0.415797	0.719733	0.355079	0.202645	0.758994	0.897621	0.198603	0.999752	0.38486
ENSFDAG00000001078	1.43794	-0.374669	-0.148132	0.207048	-0.307697	-0.452996	-0.656703	0.607682	0.0785501	0.00803534	0.13291	0.163895	0.191647	0.19225	0.0650958	0.18128	0.0984295	0.570086	0.447226	0.300777	0.134201	0.999752	0.344812
ENSFDAG00000001080	0.66903	-0.226694	-0.0898521	-0.235724	0.720907	0.598402	0.837026	0.778918	0.179634	0.00937608	0.216231	0.281835	0.30627	0.313732	0.448419	0.592742	0.353441	0.612206	0.174482	0.279569	0.135078	0.999752	0.344812
ENSFDAG00000001083	0.880702	-0.391402	-0.0864445	0.0981781	0.202855	0.139684	-0.120358	1.53006	0.240126	0.0197103	0.358747	0.451619	0.514178	0.519164	0.47647	0.424444	0.538072	0.869798	0.762762	0.845549	0.867338	0.999752	0.642064
ENSFDAG00000001086	0.123777	0.0331556	-0.0147442	-0.15179	0.087405	-0.0569635	0.0274629	0.0858562	0.0135055	0.00110562	0.0201484	0.0253705	0.0288758	0.0291581	0.672711	0.775415	0.657459	0.284907	0.583179	0.737459	0.872227	0.999752	0.643327
ENSFDAG00000001089	0.930669	0.017683	-0.103707	0.110292	-0.113212	0.0846681	-0.31841	0.232122	0.0411434	0.00293325	0.0571452	0.0728294	0.081609	0.0827427	0.0533979	0.93053	0.0555124	0.644529	0.674847	0.766939	0.268322	0.999752	0.420033
ENSFDAG00000001091	0.284346	0.381031	-0.0704587	0.31617	0.190328	-0.117058	-0.535686	0.850545	0.122687	0.0110892	0.193252	0.241131	0.277695	0.279594	0.757841	0.27667	0.503438	0.472008	0.698316	0.824209	0.311019	0.999752	0.438719
ENSFDAG00000001092	-0.112724	-0.229364	0.0225889	-0.0645608	-0.13422	-0.0328008	0.0439174	0.159037	0.0244611	0.00205481	0.0370033	0.046485	0.0530677	0.053546	0.777436	0.142507	0.618258	0.737157	0.533593	0.886774	0.849474	0.999752	0.636442
ENSFDAG00000001094	-0.00705927	-0.113223	0.00549524	-0.00868832	0.153026	-0.178615	-0.0146414	0.0732144	0.0156042	0.00089495	0.0195631	0.0253503	0.0277848	0.0283631	0.979186	0.364732	0.854256	0.950469	0.336495	0.283921	0.930721	0.999752	0.65828
ENSFDAG00000001096	-0.219845	0.128864	0.0168042	0.0583614	-0.0966193	0.152221	0.33738	0.0615552	0.0110215	0.000776533	0.0152184	0.0194145	0.021727	0.0220366	0.375562	0.219645	0.546491	0.636151	0.488041	0.301746	0.0230426	0.999752	0.255044
ENSFDAG00000001097	1.73472	-0.481457	-0.151973	-0.25441	-0.361592	-1.09785	0.0404895	0.912294	0.243	0.0106789	0.273063	0.358352	0.38395	0.396792	0.0693406	0.328725	0.141392	0.626359	0.545818	0.0764336	0.948749	0.999752	0.663808
ENSFDAG00000001109	-0.0192515	0.197592	-0.0166221	0.219658	-0.0373899	0.14296	0.125953	0.0428806	0.00453207	0.00057954	0.00881412	0.0106332	0.0127922	0.0127468	0.925929	0.00333454	0.4899	0.0192998	0.716907	0.206235	0.264595	0.999752	0.41793
ENSFDAG00000001112	0.274699	-0.235094	-0.0563459	1.30217	0.460515	0.332746	-0.325404	0.518279	0.0543861	0.0070095	0.106316	0.128159	0.154336	0.153753	0.70278	0.313414	0.500943	6.50718e-05	0.19831	0.397	0.40661	0.999752	0.478644
ENSFDAG00000001114	-1.16342	0.554159	0.098234	0.751746	0.466573	-0.0455032	-0.904446	0.36931	0.0356743	0.00503288	0.0740648	0.0884843	0.107807	0.107109	0.0555636	0.00334648	0.166146	0.00574018	0.116763	0.889777	0.00571729	0.999752	0.217957
ENSFDAG00000001117	-0.386388	-0.476696	0.0634579	0.0988822	-0.0774655	0.209441	0.209698	0.0867898	0.0231175	0.00101592	0.0259775	0.0340913	0.0365265	0.0377483	0.189667	0.0017171	0.0464887	0.539541	0.674812	0.273137	0.28045	0.999752	0.424939
ENSFDAG00000001118	0.608782	-0.146026	-0.0543422	-0.171909	-0.0655802	-0.0884733	-0.087237	0.0938418	0.0249959	0.00109847	0.0280883	0.0368614	0.0394944	0.0408155	0.046889	0.355681	0.101084	0.305015	0.73267	0.656183	0.665882	0.999752	0.575992
ENSFDAG00000001122	-0.344288	-0.0467731	0.0514463	-0.21678	-0.0759417	-0.0335533	0.141037	0.167488	0.0271677	0.00214683	0.0397772	0.0502456	0.0569546	0.0575712	0.400201	0.776585	0.266854	0.277067	0.734768	0.88819	0.556665	0.999752	0.535073
ENSFDAG00000001123	0.00983303	0.0408401	-0.009993	0.0681422	0.134523	0.0435557	-0.00754055	0.146592	0.0390464	0.00171593	0.0438771	0.0575817	0.0616948	0.0637584	0.979511	0.836261	0.809371	0.744947	0.575068	0.8608	0.976176	0.999752	0.670284
ENSFDAG00000001127	0.7248	-0.188662	-0.0793081	0.267543	-0.318902	0.0321444	-0.395956	0.794312	0.11085	0.010402	0.178356	0.221759	0.256554	0.258022	0.416076	0.57095	0.436802	0.526404	0.49828	0.949398	0.435683	0.999752	0.489149
ENSFDAG00000001130	-1.13443	0.185517	0.110315	0.256118	0.0376449	0.198895	0.27404	0.0840147	0.0223783	0.000983437	0.0251469	0.0330012	0.0353586	0.0365412	9.08544e-05	0.214923	0.000435282	0.10629	0.835834	0.290176	0.151692	0.999752	0.35408
ENSFDAG00000001137	-0.21433	0.182242	0.0142436	0.150937	-0.0886204	0.100756	-0.20101	0.0770937	0.0205348	0.000902424	0.0230753	0.0302827	0.0324458	0.0335311	0.44016	0.20346	0.635394	0.320406	0.610573	0.575915	0.272325	0.999752	0.42144
ENSFDAG00000001139	-0.119044	0.0899227	0.00330396	0.39243	0.0120643	-0.00252194	-0.434572	0.144127	0.03839	0.00168709	0.0431395	0.0566137	0.0606577	0.0626866	0.753847	0.646274	0.935888	0.0588376	0.959561	0.99183	0.082617	0.999752	0.307215
ENSFDAG00000001140	0.0533032	-0.141622	-0.00352458	0.00241205	0.0321886	0.105237	0.364925	0.0530503	0.00959543	0.000668093	0.0131719	0.0168202	0.0187997	0.0190743	0.816985	0.148243	0.891536	0.983232	0.803986	0.442769	0.00823489	0.999752	0.228594
ENSFDAG00000001146	-0.478283	-0.093131	0.0618521	-0.170622	-0.159935	0.183052	0.22514	0.123955	0.0330169	0.00145096	0.0371016	0.04869	0.052168	0.0539129	0.174312	0.608275	0.104424	0.375723	0.468568	0.422877	0.33223	0.999752	0.446805
ENSFDAG00000001149	0.540334	-0.223736	-0.0572416	0.127575	-0.0844674	-0.0599786	-0.362405	0.497528	0.053273	0.00671566	0.102648	0.124009	0.148914	0.148449	0.44365	0.332369	0.484863	0.690491	0.810437	0.876484	0.346909	0.999752	0.452524
ENSFDAG00000001153	2.28884	-0.934543	-0.227975	0.0982043	0.138029	1.35532	1.1609	3.04445	0.457177	0.0394711	0.702014	0.879682	1.00752	1.01578	0.189595	0.166924	0.251182	0.906695	0.883001	0.176934	0.249382	0.999752	0.408436
ENSFDAG00000001158	0.979681	0.0330366	-0.108851	-0.0685504	-0.251094	0.058483	0.451098	0.373973	0.0844481	0.00452031	0.102743	0.133721	0.145638	0.14904	0.109154	0.909488	0.105446	0.830655	0.492303	0.878204	0.242615	0.999752	0.404521
ENSFDAG00000001160	0.0537667	-0.19485	0.00282796	-0.121646	0.0311005	0.0231144	0.245019	0.0438026	0.0116673	0.000512733	0.0131108	0.0172058	0.0184349	0.0190515	0.797256	0.071245	0.900611	0.288058	0.81258	0.864821	0.0758729	0.999752	0.300477
ENSFDAG00000001164	-0.827154	0.487803	0.0442206	0.140276	0.254511	0.453973	0.314552	0.438662	0.0484268	0.00590302	0.0913108	0.11068	0.132335	0.132055	0.211708	0.0266457	0.564916	0.642492	0.444259	0.212054	0.386713	0.999752	0.47015
ENSFDAG00000001165	-0.0656299	-0.0128437	-0.0217232	0.373888	0.0754999	0.543632	0.283609	0.129433	0.00814551	0.00181741	0.02364	0.0270256	0.0348645	0.034191	0.855251	0.886836	0.610358	0.0150264	0.646048	0.00359724	0.125083	0.999752	0.338393
ENSFDAG00000001168	-0.430311	-0.0543904	0.0157607	0.808105	0.231091	-0.0229904	-0.211225	0.218882	0.0292647	0.00288223	0.0484218	0.0599285	0.0697458	0.0700444	0.357695	0.750527	0.769086	0.000240305	0.345176	0.930629	0.424812	0.999752	0.484963
ENSFDAG00000001169	-0.0970381	-0.175036	0.00216715	0.501366	0.368436	-0.0642418	0.0878168	0.163934	0.0417006	0.00193571	0.0478605	0.0627172	0.0674891	0.0695134	0.810589	0.391361	0.960714	0.0219202	0.14124	0.804686	0.739077	0.999752	0.601154
ENSFDAG00000001171	-0.211269	-0.00992265	0.0284596	-0.0649114	0.0432918	-0.0306138	0.2599	0.122104	0.0231419	0.00152529	0.0309328	0.0396757	0.0440889	0.0448067	0.545442	0.947993	0.466181	0.712074	0.827942	0.884081	0.219514	0.999752	0.393554
ENSFDAG00000001177	0.150611	0.11854	-0.0133223	-0.129971	-0.07289	-0.0401788	0.130093	0.0994562	0.00975759	0.00135351	0.0200282	0.0239676	0.0291379	0.0289638	0.632953	0.230124	0.717265	0.358418	0.637769	0.813914	0.444624	0.999752	0.49304
ENSFDAG00000001178	0.276739	-0.073747	-0.015262	-0.164841	-0.254742	-0.0176659	-0.426829	0.0993145	0.021184	0.0012138	0.0265472	0.0344027	0.0377031	0.0384891	0.379868	0.612374	0.66134	0.311676	0.169621	0.927508	0.0295828	0.999752	0.258604
ENSFDAG00000001181	0.0720103	-0.0170154	-0.00460044	-0.0759502	-0.184155	-0.0299287	-0.0666527	0.0340291	0.00582046	0.000432543	0.00825517	0.0104839	0.0118015	0.0119508	0.696267	0.823512	0.824937	0.403199	0.0720908	0.782933	0.542058	0.999752	0.529846
ENSFDAG00000001182	-0.347106	0.114375	0.0278844	-0.0458875	0.101785	0.13205	0.224729	0.0916431	0.0157695	0.00116374	0.0222865	0.0283204	0.031855	0.0322646	0.251546	0.362402	0.413702	0.758556	0.54529	0.459384	0.210894	0.999752	0.389554
ENSFDAG00000001185	-0.134617	0.930267	-0.0254686	0.305308	-1.57016	1.45864	-0.00176255	1.24167	0.183915	0.0161294	0.284861	0.356438	0.409	0.412163	0.903843	0.0300676	0.841061	0.5673	0.00853913	0.0225607	0.997809	0.999752	0.675072
ENSFDAG00000001189	-0.154142	-0.159011	0.0329731	-0.193944	-0.103698	-0.163761	0.133103	0.164279	0.0432791	0.00192689	0.0488755	0.0641239	0.0687746	0.0710138	0.70372	0.444663	0.452557	0.380342	0.682169	0.532332	0.617441	0.999752	0.557577
ENSFDAG00000001200	-3.00072	0.572193	0.319235	-0.417436	0.256817	-0.169228	-0.130576	0.476961	0.0799164	0.00608271	0.114745	0.145422	0.164138	0.166098	1.39313e-05	0.0429633	4.25491e-05	0.217829	0.500658	0.676165	0.748672	0.999752	0.603492
ENSFDAG00000001203	0.274583	0.10788	-0.0573458	0.247014	0.0559706	0.395813	0.0256118	0.253044	0.0293567	0.00338756	0.0534644	0.0651568	0.0773603	0.077324	0.585167	0.528934	0.324488	0.285389	0.826439	0.154711	0.926615	0.999752	0.657081
ENSFDAG00000001207	0.135186	0.0219781	-0.015484	-0.0709339	-0.0540259	0.194805	-0.0955675	0.0783389	0.0208665	0.000916999	0.023448	0.0307718	0.0329699	0.0340726	0.629098	0.879071	0.609123	0.643196	0.758096	0.283335	0.604643	0.999752	0.552427
ENSFDAG00000001208	0.110327	-0.121294	0.0023372	-0.14822	0.0853516	-0.215167	-0.402394	0.0686124	0.0179985	0.000805431	0.0203656	0.0267161	0.0286652	0.0295889	0.673614	0.365938	0.934366	0.298981	0.601541	0.203778	0.0193196	0.999752	0.252487
ENSFDAG00000001209	-0.305758	0.23038	0.0291891	-0.129032	0.0696417	-0.00293094	-0.137001	0.106169	0.0229198	0.00129458	0.0285415	0.0370222	0.0405196	0.0413848	0.348048	0.128075	0.417221	0.445006	0.717396	0.988383	0.500664	0.999752	0.512763
ENSFDAG00000001213	0.791162	-0.0216245	-0.0814745	-0.123479	-0.0910882	-0.163034	0.154793	0.136386	0.0293615	0.00166392	0.0366164	0.0474862	0.0519881	0.0530921	0.032169	0.899574	0.0457865	0.51874	0.675946	0.47459	0.501716	0.999752	0.512992
ENSFDAG00000001217	0.324627	-0.123373	-0.0183957	-0.324796	-0.0504587	-0.114102	0.0160031	0.0845136	0.0144838	0.00107391	0.0205187	0.0260634	0.0293316	0.0297047	0.264139	0.305302	0.574561	0.0233631	0.754622	0.505262	0.926021	0.999752	0.657079
ENSFDAG00000001219	-0.187708	-0.51732	0.0459427	-0.151255	-0.190405	0.292964	0.739234	0.148687	0.0275342	0.00186494	0.0372905	0.0477263	0.0531866	0.0540079	0.626404	0.00182315	0.287392	0.43347	0.383445	0.203971	0.00146808	0.999752	0.204207
ENSFDAG00000001226	0.349957	-0.170729	-0.0287823	-0.0621463	0.397829	-0.541598	0.231237	0.2433	0.0402509	0.00310905	0.0582349	0.0737091	0.0833342	0.0842926	0.478023	0.394779	0.60572	0.796772	0.142831	0.0606361	0.425765	0.999752	0.485092
ENSFDAG00000001232	-2.7407	1.02985	0.241727	1.0353	0.144606	1.21351	-0.787384	1.10356	0.219589	0.0136648	0.285676	0.368042	0.406592	0.413947	0.00908238	0.0279698	0.0386518	0.0527444	0.8116	0.0570255	0.221024	0.999752	0.394401
ENSFDAG00000001234	-0.546317	0.106759	0.0538808	-0.199435	0.11822	0.168442	0.331317	0.0622787	0.0105614	0.000792719	0.0150557	0.019104	0.021529	0.0217949	0.0285861	0.298884	0.0556581	0.104085	0.392374	0.250972	0.0248182	0.999752	0.255044
ENSFDAG00000001241	0.00352073	-0.133402	-0.00137339	0.206763	-0.0415197	-0.0264924	-0.127244	0.14118	0.0243049	0.00179265	0.0343398	0.0436391	0.0490826	0.0497145	0.992524	0.39217	0.974123	0.264521	0.842455	0.904816	0.568213	0.999752	0.539402
ENSFDAG00000001242	0.122795	-0.138801	-0.00488146	-0.102073	0.0879957	-0.116578	0.0445769	0.0766411	0.0201463	0.000899328	0.0227744	0.0298778	0.0320514	0.0330894	0.657362	0.328123	0.870695	0.498801	0.610695	0.514939	0.806413	0.999752	0.623631
ENSFDAG00000001245	-0.359576	0.120285	0.0283756	0.020748	0.0894115	0.0726359	0.1116	0.111776	0.0101619	0.00153111	0.0220702	0.026196	0.0321875	0.0319167	0.282144	0.232779	0.468345	0.888928	0.580655	0.685578	0.532182	0.999752	0.52619
ENSFDAG00000001248	-0.30428	-0.0395629	0.0405508	-0.179035	0.0111989	-0.0423178	0.239874	0.0780042	0.013084	0.000994623	0.0187741	0.0237959	0.0268547	0.0271763	0.275948	0.729438	0.198516	0.191331	0.942126	0.796227	0.145645	0.999752	0.351174
ENSFDAG00000001252	-0.468091	0.0178399	0.0470882	-0.0295578	0.114995	0.106636	0.0758463	0.0575435	0.00547226	0.000785258	0.0114931	0.0137076	0.0167375	0.0166207	0.0510173	0.80943	0.0928847	0.782771	0.326003	0.4098	0.556321	0.999752	0.535037
ENSFDAG00000001253	-0.17237	-0.0776776	0.0227245	-0.116711	0.038979	0.00878794	0.273091	0.0464984	0.0123854	0.000544289	0.0139177	0.0182647	0.0195694	0.0202239	0.42408	0.485191	0.330034	0.322516	0.773026	0.94991	0.054817	0.999752	0.283229
ENSFDAG00000001256	-0.340731	0.145108	0.031029	-0.102194	-0.140893	0.0594213	0.361338	0.0721266	0.0139974	0.000897184	0.0184635	0.0237336	0.0262979	0.0267489	0.204544	0.220011	0.300238	0.451996	0.360428	0.71405	0.0271515	0.999752	0.256733
ENSFDAG00000001257	-0.39394	-0.175444	0.0717931	-0.160876	-0.335508	-0.387369	0.212764	0.287675	0.0391524	0.00377956	0.0640312	0.0793993	0.0921775	0.0926272	0.462657	0.375259	0.242895	0.52493	0.233779	0.201995	0.4845	0.999752	0.506979
ENSFDAG00000001258	0.3353	0.150819	-0.0640028	0.576877	0.0293815	0.322084	-0.457489	0.360833	0.0601636	0.0046053	0.0866371	0.109745	0.123949	0.125408	0.576717	0.538634	0.345617	0.050009	0.929327	0.360272	0.196402	0.999752	0.383878
ENSFDAG00000001267	-0.33746	0.0668462	0.043101	-0.271329	0.0566748	-0.123148	0.0611333	0.111694	0.0242869	0.00136006	0.0301302	0.0391049	0.042765	0.0436913	0.312622	0.667971	0.242519	0.118022	0.77442	0.551509	0.769928	0.999752	0.61185
ENSFDAG00000001270	-2.68612	0.653731	0.28935	-0.395182	-0.0628402	-0.264529	0.157448	0.436386	0.116237	0.00510814	0.130617	0.171414	0.183658	0.189801	4.77833e-05	0.055179	5.15514e-05	0.274198	0.879361	0.537064	0.717801	0.999752	0.593671
ENSFDAG00000001273	0.33224	-0.0496539	-0.0321542	-0.159179	0.0141818	0.0369148	0.148631	0.0303168	0.00358108	0.000405064	0.00644116	0.00786524	0.0093146	0.00931582	0.056373	0.406681	0.110126	0.047326	0.872952	0.702099	0.12358	0.999752	0.337471
ENSFDAG00000001276	1.16066	-0.390804	-0.091751	0.207561	-0.709437	0.177497	-0.573749	1.7424	0.252991	0.0226966	0.396834	0.495498	0.570118	0.574144	0.379247	0.437175	0.542512	0.741786	0.31353	0.81415	0.448929	0.999752	0.494712
ENSFDAG00000001277	-0.498708	0.170022	0.0482359	-0.0242673	-0.241336	-0.0784337	-0.296902	0.609445	0.0828715	0.00800798	0.135609	0.168141	0.195225	0.196172	0.52294	0.55478	0.58987	0.947459	0.556161	0.859104	0.502641	0.999752	0.513267
ENSFDAG00000001282	0.916722	-0.231499	-0.0866153	0.108137	-0.210583	-0.101833	0.129591	0.139239	0.0197065	0.00182003	0.0314213	0.0391266	0.0451778	0.0454578	0.014021	0.09913	0.0423283	0.541831	0.287056	0.631867	0.543311	0.999752	0.530026
ENSFDAG00000001283	0.701623	-0.227756	-0.063463	-0.111852	0.0302162	-0.0112193	-0.375119	0.261984	0.0518788	0.00324689	0.0676718	0.0871455	0.0963288	0.0980536	0.170445	0.317338	0.265388	0.667217	0.918473	0.971164	0.230938	0.999752	0.398181
ENSFDAG00000001286	-0.280228	-0.0210429	0.0216621	0.213546	0.0747421	-0.267183	-0.342947	0.404998	0.0654174	0.00519456	0.0960255	0.121245	0.13751	0.138979	0.659694	0.934429	0.763752	0.490745	0.830039	0.471211	0.357612	0.999752	0.456814
ENSFDAG00000001288	-0.508039	0.168054	0.0482322	-0.0969684	-0.0137178	0.0263308	0.213216	0.0801635	0.0133842	0.0010229	0.0192579	0.0243978	0.0275506	0.0278762	0.0727562	0.146329	0.131538	0.484705	0.930017	0.873957	0.201589	0.999752	0.385703
ENSFDAG00000001293	0.853735	-0.159452	-0.0769424	0.051105	-0.179231	-0.238851	-0.731237	0.315824	0.0509731	0.0040513	0.0748591	0.0945116	0.107202	0.108344	0.128725	0.480031	0.226725	0.851829	0.559892	0.465697	0.026314	0.999752	0.255716
ENSFDAG00000001298	0.333989	-0.0107802	-0.0278507	-0.21776	-0.0979355	-0.0938744	-0.0436624	0.149767	0.0322703	0.00182686	0.0402256	0.0521704	0.0571108	0.0583257	0.388123	0.952147	0.514657	0.277592	0.668088	0.694456	0.856531	0.999752	0.637573
ENSFDAG00000001302	0.636504	-0.0192327	-0.0613686	-0.000613267	-0.135531	-0.190597	-0.209156	0.0719414	0.0105843	0.000935406	0.0164638	0.0205859	0.0236433	0.0238208	0.0176406	0.851705	0.0447996	0.996187	0.344855	0.215145	0.175365	0.999752	0.369431
ENSFDAG00000001308	-0.115299	0.356649	-0.00862034	0.122981	0.115567	-0.063069	-0.227987	0.0655591	0.0108751	0.000837404	0.0157087	0.0198882	0.0224773	0.0227379	0.652489	0.000626241	0.765787	0.326483	0.412514	0.673995	0.130549	0.999752	0.342633
ENSFDAG00000001310	-1.01487	-0.240326	0.147283	-0.192023	-0.0701124	0.0411344	0.146347	0.445718	0.0317946	0.00621272	0.0833445	0.0964632	0.12247	0.120536	0.12848	0.177725	0.061682	0.50596	0.821402	0.906431	0.67337	0.999752	0.578
ENSFDAG00000001311	-0.562058	0.00164427	0.06145	-0.054249	0.00393179	0.051701	0.36381	0.0544939	0.0145151	0.000637881	0.0163108	0.0214054	0.0229344	0.0237015	0.0160521	0.989111	0.0149719	0.671005	0.97856	0.732808	0.0181216	0.999752	0.251789
ENSFDAG00000001313	0.403875	-0.108455	-0.0630388	0.813205	0.330795	0.698235	0.707344	0.725989	0.0759316	0.00982179	0.148786	0.179289	0.216012	0.215171	0.635497	0.693888	0.524723	0.0350108	0.434665	0.133014	0.127287	0.999752	0.340778
ENSFDAG00000001321	1.47016	0.141991	-0.191742	0.373563	-0.121217	0.190458	-0.87757	0.776849	0.101668	0.0102567	0.170616	0.210672	0.245918	0.246794	0.0953153	0.65609	0.0583215	0.36579	0.791707	0.700932	0.0773116	0.999752	0.301965
ENSFDAG00000001323	-1.34845	0.270032	0.13205	0.812713	-0.152545	-0.499042	0.172118	0.677154	0.178645	0.00794055	0.201618	0.264529	0.283678	0.292946	0.101281	0.522901	0.138372	0.0702998	0.766778	0.348776	0.750482	0.999752	0.604126
ENSFDAG00000001324	3.40414	-0.961342	-0.350119	0.528524	0.0567226	1.73298	1.1983	3.85911	0.502459	0.0509838	0.846096	1.04416	1.21973	1.22386	0.0831201	0.175032	0.120998	0.565572	0.955732	0.116614	0.278728	0.999752	0.424517
ENSFDAG00000001327	0.432788	-0.463945	0.00612101	-0.659717	-0.540313	0.0674287	0.236483	0.224033	0.0324331	0.00291945	0.0509692	0.0636216	0.0732325	0.0737423	0.360526	0.00999052	0.909805	0.00347615	0.032184	0.80323	0.383838	0.999752	0.468844
ENSFDAG00000001328	0.13372	0.0315423	-0.00909006	-0.228228	-0.0131534	-0.0898779	-0.00322504	0.0401353	0.00714966	0.000506751	0.00990148	0.0126252	0.0141382	0.0143371	0.504471	0.709121	0.686358	0.021813	0.90681	0.449719	0.978512	0.999752	0.670681
ENSFDAG00000001329	0.272039	-0.288717	-0.0320756	0.399895	0.106692	0.195019	-0.102148	0.479995	0.0758109	0.00617744	0.112819	0.142119	0.161667	0.16327	0.694573	0.294366	0.683197	0.233822	0.777167	0.627657	0.800424	0.999752	0.621541
ENSFDAG00000001331	-0.223686	0.150556	0.0460113	-0.672016	0.157955	-0.108543	-0.320161	0.442349	0.0550302	0.00587578	0.0955398	0.117323	0.13793	0.138187	0.736627	0.521005	0.54834	0.0296945	0.644691	0.770085	0.389094	0.999752	0.470785
ENSFDAG00000001337	0.0901454	-0.0582354	0.00901629	-0.251831	-0.00490516	0.161307	-1.18237	0.451158	0.120171	0.00528104	0.135038	0.177216	0.189875	0.196226	0.893238	0.86659	0.90126	0.493155	0.990703	0.711245	0.00760384	0.999752	0.228594
ENSFDAG00000001340	0.208313	-0.0955256	-0.0182287	-0.0118641	0.0955589	-0.113351	-0.109833	0.0389921	0.00906903	0.000468576	0.0108703	0.0141762	0.0153917	0.0157732	0.291453	0.315818	0.399729	0.909402	0.422215	0.360897	0.381832	0.999752	0.467842
ENSFDAG00000001341	-1.00643	0.0640416	0.104602	-0.0427069	0.0475335	0.179395	0.405145	0.154823	0.0286654	0.00194195	0.0388264	0.0496911	0.0553774	0.0562323	0.0105339	0.705242	0.0176125	0.828413	0.831143	0.445863	0.087542	0.999752	0.31133
ENSFDAG00000001342	0.0587713	-0.0526156	-0.0100019	0.275397	0.110426	0.0584785	-0.229134	0.218672	0.0212143	0.00297889	0.0439044	0.0524764	0.0638971	0.0634922	0.899985	0.717917	0.854598	0.188735	0.629773	0.817049	0.363167	0.999752	0.460054
ENSFDAG00000001345	0.940623	-0.396768	-0.0727151	0.32716	0.0711289	0.547635	0.144193	0.941921	0.0695629	0.0131001	0.177375	0.206016	0.26037	0.256522	0.332451	0.132492	0.525225	0.437272	0.875474	0.283165	0.775877	0.999752	0.613906
ENSFDAG00000001348	3.33126	-0.655795	-0.405836	-0.120317	-0.0203814	1.30851	2.34337	3.59327	0.521014	0.046815	0.817963	1.02118	1.17519	1.18343	0.0788542	0.363594	0.0606994	0.894167	0.983909	0.227417	0.0312311	0.999752	0.258813
ENSFDAG00000001350	-0.122056	-0.0213144	0.0160641	-0.0726618	-0.0189267	0.0130309	-0.129238	0.0600827	0.0105037	0.000760989	0.0147069	0.0187181	0.0210114	0.0212932	0.61852	0.835252	0.560347	0.549064	0.889973	0.928369	0.375797	0.999752	0.46555
ENSFDAG00000001351	-0.0199665	0.09113	0.00456105	-0.0911387	-0.141469	-0.0384787	0.127599	0.123194	0.0179649	0.00160378	0.0281018	0.0351048	0.0403675	0.0406585	0.954636	0.496564	0.909324	0.586668	0.450216	0.848122	0.526861	0.999752	0.523679
ENSFDAG00000001352	2.26346	-0.875856	-0.219056	0.52966	-0.948635	0.38273	0.234526	1.31595	0.21498	0.0168492	0.313407	0.396177	0.448654	0.45362	0.0484818	0.0588911	0.0914909	0.344092	0.131774	0.567731	0.72768	0.999752	0.596589
ENSFDAG00000001356	0.47666	-0.739699	-0.0795926	0.383699	0.228555	-0.181409	-0.204951	1.37533	0.100947	0.0191355	0.258663	0.300241	0.379763	0.374082	0.684413	0.0199048	0.565036	0.450586	0.676595	0.768471	0.737554	0.999752	0.600802
ENSFDAG00000001368	0.711277	-0.0606404	-0.0777283	0.278691	0.153051	-0.0177594	-0.238115	0.63383	0.0909319	0.00826982	0.14373	0.179236	0.206569	0.207944	0.371636	0.840623	0.392698	0.462276	0.717717	0.968831	0.60155	0.999752	0.55162
ENSFDAG00000001374	-0.0907387	-0.189643	0.0252628	0.239087	-0.268381	-0.0120157	-0.525328	0.370697	0.0563629	0.00479751	0.0858764	0.107751	0.123201	0.124264	0.881527	0.424405	0.715311	0.414577	0.413586	0.972692	0.136159	0.999752	0.345145
ENSFDAG00000001377	0.138309	0.211059	-0.0230807	-0.402592	0.0807514	-0.201045	0.620719	0.880291	0.221499	0.0104163	0.255523	0.334687	0.36053	0.371083	0.882805	0.653825	0.821086	0.42578	0.88899	0.737754	0.308219	0.999752	0.437338
ENSFDAG00000001380	0.2178	0.0237665	-0.019241	-0.235443	-0.051961	0.0852702	0.132469	0.111434	0.0165067	0.00144752	0.0255656	0.0319897	0.0367066	0.0369906	0.51411	0.853241	0.613048	0.140883	0.77142	0.656271	0.490974	0.999752	0.509089
ENSFDAG00000001381	-0.15696	0.0021577	0.0178278	-0.145274	0.112735	-0.003256	0.207975	0.0575468	0.0126684	0.00069905	0.0156158	0.0202863	0.022155	0.0226469	0.512917	0.984705	0.500129	0.245017	0.428644	0.982548	0.166973	0.999752	0.364874
ENSFDAG00000001383	0.309799	0.314026	-0.0359509	0.0440937	0.166575	0.351526	-0.0521318	0.834921	0.0412259	0.0118609	0.146892	0.164244	0.218037	0.21248	0.734576	0.121957	0.741321	0.908407	0.681055	0.451557	0.909955	0.999752	0.653347
ENSFDAG00000001385	-0.779087	0.241204	0.0872159	-0.360998	-0.128155	0.403453	0.630452	0.219706	0.0233836	0.00296736	0.0452507	0.0546311	0.0656589	0.0654409	0.0964866	0.114714	0.109361	0.0896886	0.583488	0.115369	0.0137208	0.999752	0.234484
ENSFDAG00000001390	0.10444	-0.244964	-0.00317252	-0.0293739	0.31882	-0.0431723	-0.0551989	0.121024	0.0315458	0.00142239	0.0357986	0.0469526	0.0504081	0.052008	0.764014	0.167829	0.932962	0.876625	0.141196	0.847516	0.808746	0.999752	0.623963
ENSFDAG00000001391	-0.192853	-0.143256	0.0250628	0.41824	-0.0602106	-0.109209	-0.174588	0.104101	0.0208688	0.00128726	0.027039	0.0348578	0.0384752	0.0391821	0.550025	0.321362	0.484834	0.0109752	0.747078	0.577691	0.377775	0.999752	0.466596
ENSFDAG00000001392	0.431145	0.0875486	-0.057882	0.23792	0.37193	0.197846	-0.24767	0.392587	0.0439392	0.00527556	0.0820527	0.0996065	0.118864	0.118667	0.491386	0.676196	0.425503	0.406207	0.23861	0.566067	0.472161	0.999752	0.503431
ENSFDAG00000001403	1.09354	-0.0732987	-0.115758	0.254684	-0.300457	-0.318917	-0.352454	0.242605	0.0431073	0.00306446	0.0597873	0.076215	0.0853761	0.0865694	0.0264082	0.72406	0.0365188	0.297602	0.276448	0.275069	0.230957	0.999752	0.398181
ENSFDAG00000001407	0.0477514	-0.0414429	-0.012067	0.559684	-0.0126159	-0.108746	-0.318802	0.106302	0.0131719	0.00141268	0.02293	0.0281459	0.0331081	0.0331653	0.88356	0.718026	0.748171	0.000218954	0.940057	0.550074	0.0800201	0.999752	0.303732
ENSFDAG00000001409	0.745244	0.160989	-0.0999939	0.558919	-0.231272	-0.0541469	-0.839805	0.522424	0.103119	0.00647845	0.134749	0.173476	0.19183	0.195242	0.302509	0.616137	0.214114	0.127859	0.578712	0.90161	0.0573536	0.999752	0.28545
ENSFDAG00000001410	-1.55025	-0.0383581	0.181396	-0.466864	-0.175165	0.419694	0.676625	0.155995	0.0415511	0.00182601	0.0466917	0.0612754	0.0656524	0.0678483	8.67049e-05	0.850738	2.18607e-05	0.0307275	0.479177	0.101427	0.00938673	0.999752	0.228594
ENSFDAG00000001414	2.24741	-1.76944	-0.189776	-1.1223	1.59889	-0.198848	1.93401	1.29977	0.346208	0.0152145	0.38904	0.510553	0.547023	0.56532	0.0486909	0.00263644	0.123913	0.0719669	0.0252417	0.788041	0.0101041	0.999752	0.228594
ENSFDAG00000001420	0.326863	-0.0452138	-0.0411337	0.0117518	-0.144174	0.465989	0.202037	0.687414	0.183101	0.00804655	0.205753	0.270018	0.289306	0.298983	0.693407	0.915849	0.646553	0.979331	0.781431	0.386295	0.711759	0.999752	0.592285
ENSFDAG00000001422	0.131337	-0.0969921	-0.00419079	-0.274489	0.11354	-0.139457	1.83538e-05	0.0298557	0.00795242	0.000349477	0.00893627	0.0117274	0.0125651	0.0129854	0.447193	0.276752	0.822621	0.00368816	0.29443	0.213461	0.999871	0.999752	0.675329
ENSFDAG00000001425	-0.238956	-0.211847	0.0627439	-0.228615	-0.263379	0.316645	-0.386767	0.341661	0.0618938	0.0043016	0.0848874	0.108415	0.121151	0.122927	0.68268	0.394476	0.33874	0.432651	0.423768	0.362968	0.269971	0.999752	0.420355
ENSFDAG00000001432	-0.242328	0.237888	0.0123934	-0.0915941	0.0719358	0.263499	0.112018	0.077635	0.020679	0.00090876	0.0232373	0.0304953	0.0326736	0.0337665	0.384458	0.0980717	0.680986	0.547932	0.680387	0.144911	0.542126	0.999752	0.529846
ENSFDAG00000001433	-0.474386	-0.000563495	0.0249587	0.251189	0.728659	-0.355499	0.557806	0.339192	0.0463272	0.00445439	0.0755905	0.0937686	0.108806	0.10935	0.41534	0.997911	0.708432	0.360915	0.0173336	0.281152	0.0916338	0.999752	0.312538
ENSFDAG00000001438	0.568314	0.154318	-0.0523003	-0.0464638	0.318505	0.0615141	0.0139295	0.735851	0.0332338	0.0104911	0.128015	0.142061	0.190423	0.185183	0.507644	0.397273	0.609621	0.896675	0.398086	0.887897	0.974177	0.999752	0.670101
ENSFDAG00000001442	1.42541	0.0348151	-0.143958	-0.329433	-0.400593	0.906131	0.00208187	0.764841	0.148959	0.00950776	0.196099	0.252153	0.279278	0.284105	0.103128	0.928124	0.139844	0.456921	0.42501	0.0864117	0.996884	0.999752	0.675072
ENSFDAG00000001444	-1.89876	1.33815	0.138438	0.0740492	1.18617	-0.11645	-0.879435	0.36104	0.0785807	0.00439542	0.0974377	0.12647	0.138293	0.141294	0.00157743	1.80954e-06	0.0367872	0.812484	0.000851618	0.754174	0.0193044	0.999752	0.252487
ENSFDAG00000001445	0.134153	0.00752696	-0.0135698	0.0649285	-0.232741	0.147082	0.00614439	0.100266	0.0158531	0.00129019	0.0235764	0.0297027	0.0337835	0.0341197	0.671808	0.95233	0.70559	0.672397	0.176876	0.423584	0.973464	0.999752	0.669941
ENSFDAG00000001447	0.738942	0.0522393	-0.0727151	-0.0458286	-0.284299	-0.135305	-0.723988	0.119571	0.0317648	0.00140032	0.0357372	0.0468965	0.0502587	0.0519288	0.0326005	0.769441	0.0519957	0.808451	0.189244	0.546147	0.0014877	0.999752	0.204207
ENSFDAG00000001453	2.35229	-0.432029	-0.22993	2.0798	0.945951	-0.095831	0.951403	6.84608	0.484552	0.0954719	1.27815	1.47818	1.87861	1.84852	0.368641	0.534834	0.456789	0.0658231	0.436542	0.944259	0.484073	0.999752	0.506936
ENSFDAG00000001455	-1.22407	-0.010975	0.119282	0.0461216	0.320297	0.000171287	-0.171271	1.54391	0.25182	0.0197727	0.367467	0.464437	0.526067	0.531861	0.324556	0.982551	0.396277	0.939352	0.638362	0.999812	0.814327	0.999869	0.626683
ENSFDAG00000001457	0.464663	-0.373533	-0.0285834	-0.116095	-0.266868	-0.265396	0.3076	0.0799638	0.0212993	0.000936019	0.0239344	0.03141	0.0336537	0.0347794	0.100341	0.0104838	0.350166	0.453005	0.132123	0.147982	0.099066	0.999752	0.320296
ENSFDAG00000001458	0.985378	-0.0776039	-0.12388	0.452338	-0.0100226	-0.0460102	-0.201676	0.47697	0.0780418	0.00610554	0.113665	0.143707	0.162708	0.164518	0.153643	0.781172	0.112877	0.179699	0.978907	0.909187	0.619035	0.999752	0.558051
ENSFDAG00000001460	-0.259147	0.0368352	0.0249816	0.00194778	-0.0580806	-0.0441856	-0.0210147	0.0649098	0.0117297	0.000817575	0.0161103	0.0205706	0.0229941	0.0233292	0.309076	0.733774	0.382289	0.987756	0.68551	0.770754	0.890568	0.999752	0.6483
ENSFDAG00000001461	0.639784	-0.367913	-0.0576173	-0.252831	-0.143777	-0.218099	0.361941	0.727456	0.110776	0.00941258	0.168621	0.211606	0.241898	0.243996	0.453183	0.268983	0.552593	0.538088	0.754619	0.657446	0.463721	0.999752	0.500595
ENSFDAG00000001467	-0.25019	0.31665	0.0136836	0.0789443	0.299046	0.277773	0.305607	0.201817	0.0250389	0.0026816	0.0435508	0.0534647	0.0628795	0.0629908	0.577584	0.0453803	0.791593	0.705216	0.195902	0.267976	0.223355	0.999752	0.395382
ENSFDAG00000001472	0.182123	0.0274471	-0.0161137	-0.235716	0.0864124	-0.300023	-0.120715	0.104872	0.0114822	0.00141243	0.021777	0.0263725	0.0315694	0.0314941	0.573851	0.79784	0.668099	0.110195	0.594651	0.0913005	0.496368	0.999752	0.51121
ENSFDAG00000001473	-0.20604	0.278941	-0.000676271	-0.0531589	0.358649	0.166614	0.0136619	0.137873	0.0226067	0.00176429	0.0328838	0.0415838	0.0470691	0.047596	0.578965	0.0635663	0.987154	0.76941	0.0786178	0.442505	0.950068	0.999752	0.663935
ENSFDAG00000001474	0.200849	0.14961	-0.0309979	0.00623665	0.0114109	0.237186	0.00965792	0.0559353	0.00551135	0.000760937	0.011277	0.0135014	0.016404	0.0163083	0.395751	0.0438771	0.261133	0.953168	0.92177	0.0640423	0.939715	0.999752	0.660724
ENSFDAG00000001475	-0.821816	-0.152001	0.116326	-0.545762	-0.0602665	-0.0634097	-0.0256967	0.141707	0.0224547	0.00182284	0.0333491	0.0420245	0.047784	0.0482631	0.0290263	0.310409	0.00643789	0.00280299	0.76877	0.771757	0.906885	0.999752	0.652631
ENSFDAG00000001480	3.98916	-1.14826	-0.337065	-0.722703	-1.12157	-1.35205	-1.96836	2.58109	0.259091	0.0350537	0.52299	0.627408	0.760304	0.756326	0.0130274	0.0240786	0.0718118	0.31763	0.156786	0.120999	0.023615	0.999752	0.255044
ENSFDAG00000001481	0.296313	-0.155846	-0.0141041	-0.0726889	-0.103101	0.151605	-0.110157	0.0706836	0.00708078	0.000960132	0.0143142	0.0171683	0.0208109	0.0207006	0.265052	0.0640177	0.648983	0.543484	0.431361	0.293296	0.443897	0.999752	0.49304
ENSFDAG00000001484	-0.013451	0.010156	0.00376379	-0.118605	0.0675527	0.068471	0.305704	0.069813	0.0114924	0.000892811	0.016677	0.0210978	0.0238683	0.0241388	0.959399	0.924524	0.89976	0.358397	0.641877	0.657624	0.0491109	0.999752	0.277854
ENSFDAG00000001486	2.69038	-0.962189	-0.250431	-0.106093	-1.01662	-0.328604	-0.129389	0.997694	0.106424	0.0134719	0.205617	0.248301	0.298329	0.29736	0.0070709	0.00318337	0.0309579	0.815009	0.0413312	0.547425	0.812441	0.999752	0.625955
ENSFDAG00000001493	-0.650051	0.304662	0.055206	0.245397	0.153777	0.111277	-0.30847	0.145237	0.0208913	0.00189429	0.0329659	0.041121	0.0473747	0.0476942	0.0880595	0.0350458	0.204648	0.176514	0.448251	0.609176	0.15781	0.999752	0.358465
ENSFDAG00000001497	0.865382	-0.0932168	-0.0700145	0.0661376	-0.059323	0.0732713	-0.117915	0.323274	0.0391845	0.00430689	0.0692424	0.0847894	0.100048	0.100148	0.128002	0.637706	0.286037	0.801551	0.838565	0.816811	0.709441	0.999752	0.591281
ENSFDAG00000001500	0.748115	-0.0409211	-0.077213	0.188834	-0.230351	-0.10123	-0.678283	0.380255	0.0704496	0.00476902	0.0953867	0.122086	0.136046	0.138149	0.225055	0.877473	0.26353	0.540924	0.509729	0.783737	0.0680176	0.999752	0.294908
ENSFDAG00000001510	-0.663571	0.0905869	0.0734341	-0.0448543	0.193872	-0.346771	-0.116955	0.181698	0.021537	0.00242676	0.0386456	0.0472076	0.0558794	0.0558932	0.119536	0.537059	0.136045	0.819516	0.372233	0.142388	0.620815	0.999752	0.558496
ENSFDAG00000001514	0.156227	-0.0877333	-0.026891	0.0769942	0.114768	0.0164908	0.40089	0.167287	0.037615	0.00202373	0.0458637	0.0596738	0.0650216	0.0665274	0.702486	0.65101	0.549997	0.719206	0.638486	0.948436	0.120121	0.999752	0.335364
ENSFDAG00000001516	0.827503	-0.0945607	-0.0981512	-0.458291	1.162	0.147439	-0.0306146	0.897829	0.181541	0.0110844	0.234116	0.302041	0.333049	0.339279	0.382489	0.824366	0.3512	0.343555	0.0344865	0.798351	0.958083	0.999752	0.665523
ENSFDAG00000001527	0.282396	0.0256543	-0.0363021	0.0497656	0.15037	0.0314158	0.161181	0.131896	0.0075225	0.00186146	0.0236974	0.0268408	0.0350442	0.0342757	0.43682	0.767393	0.400122	0.746483	0.358707	0.866726	0.38397	0.999752	0.468847
ENSFDAG00000001530	0.0199561	-0.842986	0.0567714	-0.599076	-0.0270023	-0.147109	0.0281118	0.158361	0.0421814	0.0018537	0.0473999	0.0622048	0.0666482	0.0688774	0.960005	4.05196e-05	0.187306	0.0059296	0.913785	0.568793	0.914698	0.999752	0.654871
ENSFDAG00000001536	0.181751	-0.188955	0.0153067	-0.100204	-0.546166	0.137416	0.443488	0.231278	0.0164553	0.00322423	0.0432242	0.0500148	0.0635203	0.0625124	0.705484	0.140749	0.787493	0.629827	0.0145994	0.585593	0.0761002	0.999752	0.300477
ENSFDAG00000001538	1.23963	-0.713479	-0.119209	-0.0866653	0.686238	0.727079	-0.400937	0.758777	0.202109	0.0088819	0.227113	0.29805	0.31934	0.330022	0.154709	0.112503	0.205907	0.855697	0.208759	0.198222	0.485228	0.999752	0.506979
ENSFDAG00000001541	0.20212	0.0175539	-0.0287854	0.203769	-0.0183243	0.133954	0.00412263	0.198414	0.0471258	0.00237453	0.0559007	0.0729974	0.0790853	0.0811317	0.650003	0.935552	0.554706	0.388773	0.945927	0.633839	0.988452	0.999752	0.673304
ENSFDAG00000001543	-0.114273	-0.332051	0.0403947	-0.182452	-0.186394	-0.268232	0.167528	0.130999	0.0070783	0.00185358	0.023342	0.026308	0.0345681	0.0337627	0.75221	7.92182e-05	0.348116	0.232397	0.250482	0.149109	0.361908	0.999752	0.45928
ENSFDAG00000001544	0.394592	0.0512353	-0.0495718	-0.210404	0.433476	-0.0823339	0.0669207	0.227517	0.0606017	0.0026632	0.0680991	0.0893692	0.095753	0.0989558	0.40809	0.83513	0.336765	0.420084	0.147056	0.790182	0.831533	0.999752	0.631539
ENSFDAG00000001547	0.537953	-0.00473098	-0.0602591	-0.0719649	0.0178793	-0.0731952	-0.0557607	0.0336756	0.00723263	0.000411033	0.00903097	0.0117097	0.0128232	0.0130942	0.00337352	0.955637	0.00295632	0.448885	0.868766	0.518037	0.626052	0.999752	0.560086
ENSFDAG00000001548	0.173953	-0.0294356	-0.0176545	0.0423271	-0.112751	0.000472803	-0.0378023	0.0308975	0.00491856	0.000397175	0.00728435	0.00918365	0.0104359	0.0105422	0.322359	0.674694	0.375695	0.619942	0.239372	0.996307	0.712743	0.999752	0.592879
ENSFDAG00000001549	1.94895	-0.635886	-0.165489	-0.422943	-0.202434	-0.656378	-0.553621	0.735525	0.195916	0.00860972	0.220154	0.288917	0.309554	0.319908	0.0230567	0.150824	0.0745033	0.367374	0.706459	0.238105	0.327672	0.999752	0.444197
ENSFDAG00000001551	-0.166603	0.193412	-0.00893579	0.146667	0.0101045	0.311401	0.205486	0.162645	0.017318	0.0021966	0.0335025	0.0404494	0.0486116	0.0484509	0.679528	0.141638	0.848793	0.42296	0.95993	0.15784	0.350543	0.999752	0.452987
ENSFDAG00000001557	-1.17379	0.161219	0.130172	-0.193042	-0.0517711	0.177474	0.0847033	0.101075	0.0193605	0.00126023	0.0257249	0.0330281	0.0366546	0.0372655	0.000222449	0.246593	0.000245564	0.228752	0.775744	0.353936	0.660821	0.999752	0.574207
ENSFDAG00000001558	0.686242	-0.274216	-0.065527	0.143113	0.14336	0.0597024	0.149237	0.189177	0.0343772	0.00238052	0.0470641	0.0601265	0.0671634	0.0681554	0.114619	0.13915	0.179264	0.509458	0.558784	0.817805	0.567562	0.999752	0.539379
ENSFDAG00000001560	0.556829	0.0659459	-0.0472687	-0.0803529	-0.487468	0.177642	-0.192227	0.270276	0.0532334	0.00335295	0.0696451	0.0896436	0.0991536	0.100909	0.284137	0.775015	0.414318	0.760764	0.103499	0.572654	0.545092	0.999752	0.530396
ENSFDAG00000001562	0.307539	-0.0503801	-0.0286416	-0.066365	0.0304998	0.0263756	0.0597249	0.0927584	0.00944055	0.00125815	0.0188662	0.0226669	0.0274148	0.0272837	0.312605	0.6041	0.41939	0.628978	0.839462	0.873434	0.717666	0.999752	0.593671
ENSFDAG00000001563	-0.421885	0.0952396	0.053922	-0.00743252	0.270153	0.174886	-0.262954	0.436991	0.0615305	0.00571592	0.0984329	0.122504	0.14155	0.142403	0.523342	0.701017	0.47571	0.9811	0.440201	0.642048	0.485916	0.999752	0.507171
ENSFDAG00000001564	0.750617	-0.15872	-0.0677142	0.211553	-0.205073	-0.0729352	-1.01919	0.494024	0.102597	0.00606867	0.130414	0.168634	0.185373	0.189035	0.285551	0.62023	0.384723	0.558003	0.617508	0.865482	0.0190703	0.999752	0.251858
ENSFDAG00000001570	0.472023	-0.262255	-0.0536415	0.540628	-0.0790147	-0.00613979	-0.183827	0.315861	0.0607421	0.00393544	0.080531	0.103431	0.114733	0.116662	0.400978	0.287287	0.392509	0.0567674	0.805925	0.985538	0.590437	0.999752	0.548173
ENSFDAG00000001571	1.37084	0.284485	-0.209577	1.00973	0.307207	0.273846	-1.28087	2.32965	0.383608	0.0297916	0.556573	0.704129	0.796566	0.805599	0.369114	0.646004	0.224665	0.17591	0.714287	0.758974	0.153559	0.999752	0.356192
ENSFDAG00000001572	0.391184	0.049732	-0.0464329	0.274834	-0.154152	0.114824	-0.575667	0.284373	0.0465205	0.00364028	0.0677632	0.0856712	0.0970015	0.0980797	0.463216	0.817644	0.441544	0.291069	0.598428	0.712371	0.0660398	0.999752	0.294209
ENSFDAG00000001573	-0.261163	0.0541924	0.0203183	-0.0827213	0.158335	0.0456356	0.344392	0.0902851	0.0177589	0.00112032	0.0232509	0.0299239	0.0331036	0.033688	0.384755	0.684258	0.543824	0.587476	0.360028	0.801952	0.0606064	0.999752	0.288089
ENSFDAG00000001576	0.124604	0.133704	-0.0221447	0.0425068	-0.0559268	-0.0709369	0.238077	0.0995808	0.0137922	0.00130536	0.0223005	0.027705	0.0320856	0.032261	0.692946	0.254918	0.53993	0.775918	0.73687	0.69209	0.185007	0.999752	0.376416
ENSFDAG00000001577	0.299878	-0.101835	-0.0371122	0.0605008	0.0839736	-0.0680057	-0.0143518	0.0933939	0.00997621	0.00126093	0.0192554	0.0232563	0.0279364	0.027847	0.326464	0.307936	0.295962	0.662838	0.581876	0.684101	0.931464	0.999752	0.658425
ENSFDAG00000001578	0.281973	0.093311	-0.0849089	0.824695	0.167162	1.01166	0.0119103	1.21216	0.143216	0.0161953	0.257556	0.314507	0.37245	0.372502	0.797865	0.805243	0.504641	0.104159	0.765648	0.0973827	0.984431	0.999752	0.672158
ENSFDAG00000001583	-0.310003	-0.21018	0.0684236	-0.322017	-0.438851	-0.0654484	0.0716335	0.201855	0.0184655	0.0027636	0.0399184	0.0474122	0.0582059	0.0577277	0.490197	0.121932	0.193063	0.107021	0.0438574	0.786177	0.765594	0.999752	0.610292
ENSFDAG00000001584	0.00495107	0.0650659	0.00655045	-0.100307	-0.0177517	-0.302248	-0.315776	0.112006	0.0285037	0.00132244	0.0327076	0.0428614	0.0461206	0.0475053	0.988197	0.699947	0.857051	0.579144	0.93167	0.15931	0.147394	0.999752	0.352107
ENSFDAG00000001587	0.0740823	0.00751817	-0.00546426	-0.187319	0.0802419	-0.0772545	0.156147	0.117238	0.0126767	0.00158096	0.0242565	0.0293353	0.0351782	0.0350797	0.828706	0.946761	0.890694	0.22908	0.63943	0.680416	0.404454	0.999752	0.477715
ENSFDAG00000001592	-0.0247678	0.0633287	-0.0158065	0.189546	0.39693	0.203775	0.27026	0.288926	0.0294617	0.00391821	0.0587959	0.0706549	0.0854317	0.0850284	0.963248	0.712162	0.800641	0.434391	0.135362	0.485695	0.354015	0.999752	0.454816
ENSFDAG00000001599	-0.0592332	0.0482948	0.0178191	-0.307329	-0.0927622	-0.175335	-0.146329	0.10469	0.0248723	0.00125282	0.0294995	0.0385223	0.0417338	0.0428143	0.854745	0.759432	0.614659	0.0735576	0.636482	0.390743	0.479447	0.999752	0.505317
ENSFDAG00000001600	0.495374	0.196327	-0.0549147	-0.532231	0.0208301	-0.0716065	-0.384013	0.459152	0.07902	0.00583045	0.111667	0.141902	0.159609	0.161662	0.46474	0.484921	0.47203	0.111225	0.955902	0.857753	0.339535	0.999752	0.44993
ENSFDAG00000001603	-0.460941	-0.0286172	0.0245629	-0.118301	0.585597	0.250789	0.21778	0.910676	0.169306	0.0114145	0.228784	0.292918	0.326271	0.331356	0.629083	0.944553	0.818164	0.804654	0.279254	0.660621	0.705186	0.999752	0.590088
ENSFDAG00000001605	-0.399883	-0.025096	0.0293129	0.205042	0.0303308	0.324208	0.350304	0.124755	0.0211917	0.00158753	0.0301796	0.038301	0.0431533	0.0436889	0.257571	0.863128	0.461916	0.237888	0.876836	0.118597	0.0937487	0.999752	0.314301
ENSFDAG00000001608	-0.016077	-0.00581323	0.00592859	0.0583959	0.122412	-0.388617	-0.270846	0.113329	0.0176234	0.00146188	0.0264787	0.0333017	0.0379613	0.0383176	0.96191	0.965072	0.876775	0.719694	0.50235	0.0460886	0.166469	0.999752	0.364874
ENSFDAG00000001609	0.85418	-0.169826	-0.104322	0.543786	-0.0503627	-0.345739	-0.377901	0.587484	0.103536	0.00743095	0.144285	0.183783	0.206088	0.208909	0.265096	0.597646	0.226206	0.152263	0.906481	0.446303	0.408351	0.999752	0.479283
ENSFDAG00000001610	-1.23896	-0.03812	0.156442	-0.326757	0.146517	-0.138013	-0.303098	0.0981031	0.0252697	0.0011556	0.0288336	0.0378023	0.0406299	0.041884	7.63363e-05	0.810484	4.18363e-06	0.0543155	0.4511	0.493538	0.138604	0.999752	0.347511
ENSFDAG00000001613	-0.0470942	0.0730715	-0.00209516	0.215988	0.123343	-0.0742924	-0.0329029	0.0690363	0.0163183	0.000826982	0.0194029	0.0253296	0.0274556	0.028159	0.857751	0.567309	0.94192	0.120999	0.43834	0.653891	0.84455	0.999752	0.63494
ENSFDAG00000001619	-0.134908	-0.309733	-0.0119321	2.09204	1.17004	0.35935	0.276508	2.35634	0.0923647	0.033765	0.403723	0.443002	0.602425	0.584061	0.929968	0.308136	0.948225	0.000992957	0.0787624	0.643376	0.717496	0.999752	0.593671
ENSFDAG00000001624	1.06641	-0.171753	-0.141126	0.625736	0.291666	-0.0273481	-0.394093	0.864132	0.10572	0.0115005	0.185638	0.227549	0.268148	0.268497	0.251304	0.597338	0.188181	0.146417	0.540913	0.957881	0.446924	0.999752	0.493984
ENSFDAG00000001625	1.33016	-0.255295	-0.130612	-0.0832806	-0.0506048	-0.26734	-0.424064	0.317779	0.072091	0.0038376	0.0875029	0.113923	0.124015	0.126938	0.0182937	0.341692	0.0349965	0.7783	0.88082	0.447762	0.233951	0.999752	0.399463
ENSFDAG00000001633	4.23294	-2.30323	-0.329406	0.395046	-0.153821	0.823675	2.18004	3.8333	0.464401	0.051073	0.820926	1.00519	1.18618	1.18733	0.0306182	0.000725381	0.144954	0.66283	0.878065	0.449483	0.0454265	0.999752	0.275798
ENSFDAG00000001638	-0.339306	0.180367	0.0174831	0.221953	0.0121069	0.210427	-0.0792384	0.185878	0.0200801	0.0025068	0.0384478	0.0464933	0.0557609	0.0556031	0.431279	0.203074	0.726949	0.257658	0.955223	0.372864	0.736843	0.999752	0.600582
ENSFDAG00000001639	-0.304724	0.0445412	0.0449719	-0.356842	-0.182749	0.0432884	0.248447	0.0750975	0.0099231	0.000990335	0.0165469	0.020453	0.0238428	0.0239354	0.266149	0.654778	0.152987	0.00553601	0.201306	0.779212	0.108299	0.999752	0.323573
ENSFDAG00000001640	0.239757	-0.0839599	-0.00936538	-0.421697	-0.106473	-0.189289	0.17475	0.151893	0.0233072	0.00196317	0.0353094	0.0443461	0.050642	0.0510944	0.538435	0.58235	0.832597	0.0248216	0.613132	0.400268	0.43947	0.999752	0.491176
ENSFDAG00000001645	0.747028	-0.101388	-0.0782516	0.0816981	-0.263353	0.126071	-0.106718	0.0874051	0.0229387	0.00102595	0.0259501	0.0340425	0.0365246	0.0377028	0.0115111	0.503224	0.0145641	0.612045	0.153482	0.509471	0.58259	0.999752	0.544835
ENSFDAG00000001647	1.11867	-0.318912	-0.0918036	-0.734369	0.115518	-0.933492	0.468223	0.51685	0.137669	0.00605001	0.154701	0.20302	0.217523	0.224798	0.119699	0.390058	0.237893	0.0618874	0.79766	0.0453372	0.323376	0.999752	0.442798
ENSFDAG00000001651	1.12237	-0.358732	-0.110862	0.154721	0.0234996	-0.242696	0.109184	0.26283	0.0448281	0.00334236	0.0636867	0.0808579	0.0910536	0.0921965	0.0285776	0.0902046	0.0551635	0.539816	0.934136	0.421229	0.719159	0.999752	0.59388
ENSFDAG00000001653	-0.845937	-0.036376	0.092937	-0.346679	0.442861	0.131514	0.48903	0.299058	0.0796577	0.00350064	0.0895126	0.117471	0.125862	0.130072	0.121889	0.897449	0.116234	0.246563	0.196317	0.71086	0.175116	0.999752	0.369431
ENSFDAG00000001654	3.14334	-1.94888	-0.193765	0.179108	0.154966	-0.121269	1.04076	6.43442	0.4925	0.0892768	1.22082	1.42314	1.79011	1.76555	0.215276	0.00548569	0.516665	0.871226	0.896645	0.927781	0.433471	0.999752	0.487691
ENSFDAG00000001655	0.19646	0.0274429	-0.0624689	0.684544	0.242793	-0.05847	-0.514028	0.253568	0.0230662	0.00347321	0.0500744	0.0594392	0.0730278	0.0724148	0.696429	0.856608	0.289152	0.00222004	0.319317	0.828702	0.0561108	0.999752	0.284807
ENSFDAG00000001656	0.941322	-0.0928649	-0.121407	0.455761	0.149561	-0.113169	-0.159163	0.501638	0.100687	0.00620159	0.130369	0.168085	0.185501	0.188918	0.18383	0.769781	0.123154	0.206853	0.715262	0.792739	0.714225	0.999752	0.593034
ENSFDAG00000001663	-0.122297	0.133032	0.00456317	0.236646	-0.176461	0.0250267	-0.540508	0.258697	0.0360794	0.00338807	0.0580751	0.072203	0.0835391	0.0840155	0.809983	0.483699	0.937514	0.326108	0.51137	0.930999	0.0622154	0.999752	0.290212
ENSFDAG00000001664	0.0875961	0.0876238	0.00170439	-0.432411	-0.149771	0.0501783	-0.505155	0.0610729	0.0162675	0.000714892	0.01828	0.0239896	0.0257033	0.026563	0.722998	0.492078	0.949173	0.0013828	0.333557	0.754293	0.00193875	0.999752	0.204207
ENSFDAG00000001667	-0.320667	0.106349	0.0387299	-0.518418	0.0111776	0.0648026	0.0941787	0.197868	0.0246155	0.00262831	0.042736	0.0524799	0.0616977	0.0618125	0.47098	0.497873	0.449976	0.0121504	0.961085	0.794177	0.704834	0.999752	0.589939
ENSFDAG00000001669	0.41958	-0.0723817	-0.0350726	-0.0851488	-0.168739	-0.232063	-0.0892479	0.0470276	0.0116464	0.000558194	0.0135373	0.0177182	0.0191158	0.0196561	0.0530135	0.502406	0.137681	0.46427	0.204917	0.0932579	0.524402	0.999752	0.522661
ENSFDAG00000001677	0.325284	-0.359647	-0.0192383	0.401811	0.517866	0.155321	-0.152562	1.28731	0.16353	0.0170576	0.279939	0.344548	0.403876	0.404911	0.774346	0.373809	0.882894	0.447594	0.377641	0.806919	0.810521	0.999752	0.624991
ENSFDAG00000001683	3.78699	-1.01775	-0.343778	-0.92649	-1.66685	-0.934552	-1.48094	1.65631	0.160441	0.0225664	0.332416	0.397253	0.483812	0.480723	0.00325531	0.0110576	0.0221094	0.108068	0.00817826	0.179083	0.0326834	0.999752	0.261224
ENSFDAG00000001689	0.534614	0.0845616	-0.0483485	-0.616694	-0.18036	0.15292	-0.0280955	0.106798	0.00768675	0.00148779	0.020006	0.0231759	0.0293898	0.0289333	0.10186	0.334796	0.210037	1.30047e-05	0.236122	0.372393	0.868808	0.999752	0.642616
ENSFDAG00000001690	0.593237	-0.0969011	-0.0851205	2.24147	1.45278	0.826361	0.491091	3.54914	0.113241	0.0511721	0.597997	0.646548	0.895848	0.8652	0.752841	0.77338	0.706705	0.00374876	0.0708007	0.382621	0.597525	0.999752	0.550014
ENSFDAG00000001700	-0.19586	-0.0346922	0.0313344	-0.175005	0.156438	-0.286177	0.0319694	0.19956	0.018996	0.00272304	0.0398681	0.0475547	0.0580583	0.057655	0.661068	0.801265	0.548191	0.380773	0.473142	0.234956	0.894081	0.999752	0.648935
ENSFDAG00000001706	-0.0385119	-0.000325669	0.0209655	-0.327943	0.00359223	-0.0826828	-0.155169	0.267331	0.0278859	0.0036176	0.0547465	0.0659512	0.0794893	0.079173	0.940624	0.998444	0.727409	0.161039	0.98884	0.769319	0.581317	0.999752	0.544252
ENSFDAG00000001710	0.355073	-0.120046	-0.038645	0.314633	-0.0778278	0.0322218	0.253179	0.0828455	0.00688062	0.00114284	0.0160063	0.0188176	0.0234108	0.0231477	0.217343	0.147836	0.252979	0.0128862	0.570475	0.833206	0.0960973	0.999752	0.317413
ENSFDAG00000001714	-0.49443	-0.0658762	0.0240172	0.812948	0.456947	0.390103	0.367427	0.127473	0.0084738	0.00178437	0.0235139	0.0270249	0.0346241	0.0340076	0.166105	0.474219	0.569651	1.14843e-07	0.00544249	0.0360398	0.0463242	0.999752	0.276006
ENSFDAG00000001716	0.17876	-0.0400233	-0.0111323	-0.091692	-0.0606993	0.0178873	0.0676277	0.0206764	0.001284	0.000290533	0.00376762	0.00430171	0.00555861	0.00544922	0.213802	0.26402	0.513683	0.135223	0.354721	0.810394	0.359598	0.999752	0.458067
ENSFDAG00000001717	-0.594391	0.0569834	0.0681817	0.0470643	0.0799154	-0.245277	-0.192385	0.0822799	0.0196329	0.000983793	0.0232357	0.0303505	0.0328663	0.0337249	0.0382497	0.68424	0.0297215	0.757508	0.646435	0.176072	0.294823	0.999752	0.431522
ENSFDAG00000001718	0.0155074	0.178838	-0.0072594	0.193836	-0.734633	0.497584	0.266104	0.879068	0.222481	0.0103901	0.255953	0.335335	0.361025	0.371731	0.986804	0.704575	0.943224	0.701618	0.204577	0.407598	0.662509	0.999752	0.574505
ENSFDAG00000001719	0.648766	-0.744266	-0.0377829	-0.463799	0.315513	0.553671	1.12624	0.930797	0.171526	0.0116846	0.232953	0.298006	0.332303	0.337376	0.501297	0.0723258	0.726689	0.336583	0.563286	0.336818	0.0525045	0.999752	0.280837
ENSFDAG00000001721	-1.03302	0.0841127	0.12107	-0.362864	-0.339105	0.369567	0.399848	0.379099	0.100977	0.00443756	0.11347	0.148911	0.159548	0.164885	0.0933909	0.791243	0.0691473	0.281383	0.379531	0.354849	0.32477	0.999752	0.442798
ENSFDAG00000001728	0.300009	-0.0801203	-0.0348881	0.0181167	-0.0336422	0.0946672	0.289349	0.0237554	0.00632753	0.00027807	0.00711035	0.0093312	0.00999775	0.0103322	0.0515956	0.313828	0.0364218	0.829885	0.727638	0.343751	0.00441882	0.999752	0.206002
ENSFDAG00000001729	-0.114869	0.0280993	0.0178632	-0.151507	-0.0956445	-0.0314635	0.170948	0.0902228	0.0112281	0.00119839	0.0194888	0.0239332	0.0281355	0.0281882	0.702147	0.79087	0.605846	0.2778	0.536415	0.851208	0.308586	0.999752	0.437575
ENSFDAG00000001730	0.094142	0.137924	-0.019689	0.0252177	-0.0463827	0.201241	0.291731	0.0990491	0.0148179	0.00128485	0.0228075	0.0285683	0.0327367	0.0330009	0.764842	0.257195	0.58281	0.867385	0.783763	0.266034	0.108295	0.999752	0.323573
ENSFDAG00000001731	-0.920757	-0.209571	0.100716	0.0192858	0.43588	0.314591	0.0655543	0.796866	0.0556827	0.0111215	0.148399	0.171403	0.218197	0.214622	0.302326	0.374477	0.339563	0.960072	0.292419	0.500646	0.887473	0.999752	0.647453
ENSFDAG00000001732	-0.499315	-0.22089	0.0772919	-0.409403	0.0737921	-0.12927	0.258089	0.468324	0.124743	0.00548198	0.140176	0.183959	0.1971	0.203692	0.465618	0.5317	0.296524	0.274179	0.8634	0.770917	0.567423	0.999752	0.539333
ENSFDAG00000001734	2.18968	-0.244958	-0.165683	-0.874126	-0.400712	-0.608269	-0.130262	1.4275	0.193601	0.0187634	0.31735	0.393368	0.456898	0.459073	0.0668469	0.577717	0.226455	0.120736	0.522888	0.368183	0.847542	0.999752	0.635691
ENSFDAG00000001738	0.184577	-0.0651929	-0.0282125	0.0151123	0.20904	0.102956	0.23561	0.0874597	0.0200166	0.00105436	0.0241876	0.0315097	0.0342691	0.0350913	0.532544	0.644948	0.384928	0.922591	0.238947	0.578102	0.208483	0.999752	0.388129
ENSFDAG00000001743	0.317531	-0.206304	-0.0195477	-0.49239	0.0253129	0.112341	0.186576	0.692148	0.167511	0.00825269	0.196882	0.257377	0.278313	0.285802	0.702707	0.614217	0.829629	0.267128	0.960206	0.831368	0.727091	0.999752	0.596383
ENSFDAG00000001744	-0.686047	0.499487	0.0545701	0.460905	-0.331427	0.495403	-0.523236	0.385852	0.0624577	0.00494738	0.0915625	0.115635	0.131111	0.132521	0.269401	0.0456489	0.437849	0.127713	0.329739	0.17126	0.150625	0.999752	0.353472
ENSFDAG00000001745	-0.0899413	0.628816	-0.0135159	0.541457	-0.366346	0.0006093	-0.930822	0.73506	0.164244	0.00890325	0.200908	0.261285	0.284893	0.291408	0.916451	0.120758	0.886099	0.227049	0.473562	0.999089	0.0846516	0.999752	0.309495
ENSFDAG00000001749	-3.08916	2.02841	0.257263	-0.595551	0.0965464	-0.236125	0.256941	0.678203	0.098284	0.00883662	0.154354	0.192691	0.221768	0.22332	0.000176049	9.7907e-11	0.00620498	0.129554	0.825917	0.616084	0.586639	0.999752	0.54708
ENSFDAG00000001752	-0.557068	-0.00118681	0.0567614	-0.0125397	0.312626	-0.191545	-0.134073	0.186272	0.0384246	0.0022911	0.0490194	0.0633497	0.0696917	0.0710497	0.196799	0.995169	0.23568	0.954834	0.214203	0.468102	0.61497	0.999752	0.556317
ENSFDAG00000001753	-0.204921	-0.27904	0.0286058	0.149097	0.423721	0.239654	0.442988	1.04645	0.23341	0.0126792	0.285772	0.371605	0.405258	0.414493	0.841229	0.563553	0.799462	0.780316	0.487001	0.706574	0.491409	0.999752	0.509213
ENSFDAG00000001759	0.593079	-0.173906	-0.0523328	0.0452408	-0.197303	0.0398942	-0.307383	0.204932	0.0181977	0.00281251	0.0402289	0.0476298	0.0587145	0.0581769	0.190159	0.197344	0.323743	0.821544	0.365967	0.869227	0.202523	0.999752	0.385982
ENSFDAG00000001765	-1.59404	0.257534	0.165507	-0.0092826	0.064998	-0.345299	0.0684859	0.176312	0.0239565	0.00231693	0.0392215	0.0486264	0.0564651	0.0567374	0.000146893	0.0961361	0.000585119	0.962616	0.76818	0.146187	0.773715	0.999752	0.613301
ENSFDAG00000001767	0.220834	0.0559956	-0.0252878	0.0777402	-0.0518651	-0.0787481	-0.307076	0.0258066	0.00687388	0.00030208	0.00772429	0.0101369	0.010861	0.0112243	0.169231	0.49943	0.145681	0.376406	0.606457	0.449875	0.00375004	0.999752	0.204207
ENSFDAG00000001773	1.11494	-0.516251	-0.141544	2.40714	1.57776	2.23098	1.32506	8.78609	0.391532	0.125328	1.52609	1.69167	2.27078	2.20763	0.706811	0.409347	0.689288	0.051349	0.225105	0.13874	0.372494	0.999752	0.463753
ENSFDAG00000001774	-0.0590099	0.116948	0.0131311	-0.305615	0.103917	-0.0387349	-0.144901	0.286558	0.0497118	0.00363406	0.0699204	0.0889225	0.0999162	0.101229	0.912223	0.599917	0.827566	0.247774	0.727477	0.90247	0.648801	0.999752	0.569112
ENSFDAG00000001775	-0.440783	-0.0804882	0.0391013	0.209166	0.221231	0.0787603	0.130794	0.103552	0.0182562	0.00130972	0.025436	0.0324002	0.0363308	0.0368287	0.17076	0.551376	0.279946	0.18969	0.21905	0.679453	0.495525	0.999752	0.510666
ENSFDAG00000001777	0.0302528	0.165057	-0.0150284	0.176534	0.0166037	-0.0639132	-0.19376	0.0357253	0.00628658	0.000451995	0.00876857	0.0111673	0.012525	0.0126959	0.872835	0.037366	0.47964	0.0593984	0.87515	0.567942	0.0855006	0.999752	0.309712
ENSFDAG00000001780	-0.310887	0.150981	0.0244962	-0.103447	0.120668	0.0933629	0.103528	0.119404	0.0198423	0.00152476	0.0286309	0.0362552	0.0409654	0.0414428	0.368285	0.283797	0.530441	0.540957	0.526255	0.644597	0.611069	0.999752	0.555052
ENSFDAG00000001784	0.147186	0.0117884	-0.00734269	-0.284409	-0.0789286	-0.0683947	-0.123311	0.0953541	0.0253987	0.00111617	0.0285409	0.0374554	0.0401309	0.0414732	0.633613	0.941035	0.826042	0.0922815	0.6834	0.732791	0.544843	0.999752	0.530262
ENSFDAG00000001786	0.227736	0.388039	-0.0466116	0.424402	-0.267813	-0.184453	-0.24908	0.666134	0.177433	0.00779746	0.199384	0.26166	0.28035	0.289728	0.780221	0.356941	0.597598	0.34188	0.600587	0.727566	0.643546	0.999752	0.56714
ENSFDAG00000001787	0.657331	0.0121713	-0.0720626	0.104245	0.0227995	0.129359	0.157539	0.15222	0.0185761	0.00202643	0.0326744	0.0400404	0.047201	0.0472585	0.0920274	0.928842	0.109416	0.564139	0.909285	0.551564	0.468645	0.999752	0.502138
ENSFDAG00000001792	0.257582	0.0529939	-0.0518206	0.853334	0.202121	0.521185	0.203879	0.651311	0.0837214	0.00861804	0.142189	0.17523	0.205062	0.205669	0.749598	0.85468	0.576701	0.023635	0.629206	0.249761	0.653027	0.999752	0.571587
ENSFDAG00000001794	-0.390336	0.359349	0.0279817	-0.400246	-0.0348488	0.616358	0.0272377	0.300792	0.0801195	0.00352093	0.0900315	0.118152	0.126592	0.130826	0.476642	0.204248	0.637234	0.182231	0.919246	0.0832151	0.939972	0.999752	0.660849
ENSFDAG00000001795	0.583013	0.00278056	-0.0397192	-0.463564	-0.0544238	-0.287246	-0.0968034	0.190943	0.0221471	0.00255626	0.0403406	0.0491617	0.0583712	0.0583434	0.182134	0.985093	0.432105	0.0209984	0.806103	0.234469	0.68859	0.999752	0.583534
ENSFDAG00000001797	0.391766	0.066885	-0.0453708	-0.107723	0.0605742	0.17345	0.319216	0.243481	0.0174007	0.00339341	0.0455454	0.0527242	0.0669224	0.0658692	0.427224	0.612124	0.436064	0.613727	0.79193	0.502549	0.213581	0.999752	0.390305
ENSFDAG00000001806	-0.50447	0.0204159	0.0458358	0.0985243	0.11888	-0.038157	0.498706	0.170485	0.017824	0.00230656	0.0349358	0.0420963	0.0507214	0.0505234	0.221792	0.878461	0.33989	0.598112	0.562311	0.865462	0.0265071	0.999752	0.255716
ENSFDAG00000001808	-0.948733	-0.327904	0.126311	-0.362279	0.109217	0.191649	0.229104	0.179549	0.0349159	0.00223259	0.046004	0.0591461	0.0655205	0.0666492	0.0251565	0.0792877	0.00751239	0.0912081	0.653371	0.454027	0.374845	0.999752	0.464742
ENSFDAG00000001809	1.66107	-0.603404	-0.154328	-0.157051	-0.483282	-0.589383	-0.270225	0.765941	0.083558	0.0103196	0.158882	0.192334	0.230353	0.229776	0.0577002	0.0368482	0.128714	0.693575	0.270472	0.219445	0.572936	0.999752	0.541389
ENSFDAG00000001810	-0.198673	0.105869	0.0158005	0.0702384	0.0362993	-0.0570171	0.103128	0.0742653	0.0111168	0.000963279	0.0171044	0.0214261	0.0245503	0.024749	0.465983	0.315327	0.61069	0.591228	0.804145	0.715936	0.512121	0.999752	0.516415
ENSFDAG00000001811	0.682994	-0.228966	-0.0656953	0.0703717	-0.0735659	-0.0290093	0.0738018	0.10468	0.0144883	0.00137234	0.0234367	0.0291143	0.0337211	0.0339047	0.0347738	0.0571414	0.0761643	0.645751	0.666363	0.874477	0.688561	0.999752	0.583534
ENSFDAG00000001825	-0.326296	0.0142067	0.0390508	-0.078342	0.0838253	-0.103179	0.00707978	0.0259341	0.00690784	0.000303572	0.00776245	0.010187	0.0109147	0.0112797	0.0427471	0.864278	0.025007	0.3739	0.406242	0.323343	0.946852	0.999752	0.663309
ENSFDAG00000001826	0.634641	-0.104717	-0.0617877	0.0578336	0.255891	-1.00331	0.131676	0.876299	0.168053	0.0109236	0.223146	0.286529	0.317943	0.323257	0.497799	0.798382	0.5544	0.902559	0.632617	0.0751825	0.816851	0.999752	0.627671
ENSFDAG00000001828	-0.281343	-0.29412	0.0482353	-0.138073	0.0472292	0.296536	0.559108	0.1692	0.00586521	0.00243386	0.0286799	0.0311865	0.0429001	0.0414933	0.493995	0.000122803	0.328209	0.414899	0.78913	0.152234	0.0060553	0.999752	0.22291
ENSFDAG00000001830	-1.48203	-0.187023	0.182824	-0.23339	-0.0803528	0.246486	0.200552	0.361811	0.064092	0.00457255	0.0890504	0.113485	0.127175	0.128939	0.0137452	0.460064	0.00685779	0.434153	0.811475	0.489453	0.576493	0.999752	0.542331
ENSFDAG00000001832	0.516678	0.080018	-0.0622549	0.10643	-0.0741238	0.328427	-0.474188	0.488332	0.105419	0.00595454	0.131277	0.170285	0.186372	0.190351	0.459682	0.805334	0.4198	0.768953	0.857446	0.446799	0.277099	0.999752	0.423342
ENSFDAG00000001842	0.142124	0.0472194	-0.0139033	-0.0856821	-0.312831	-0.186131	-0.065187	0.754428	0.0961197	0.00999308	0.164218	0.202183	0.236899	0.237529	0.870023	0.878946	0.889386	0.832547	0.486601	0.702151	0.893598	0.999752	0.648935
ENSFDAG00000001843	0.47855	-0.340549	-0.045163	0.120801	0.176751	0.0157377	0.430638	0.128948	0.0306472	0.00154298	0.0363418	0.0474585	0.0514129	0.0527451	0.182642	0.0517402	0.250248	0.526293	0.417168	0.944666	0.0607809	0.999752	0.288498
ENSFDAG00000001847	-0.722734	-0.229877	0.0495165	0.836966	1.10752	0.472906	0.529211	0.777124	0.206996	0.00909665	0.232605	0.305257	0.327062	0.338001	0.412303	0.613376	0.603643	0.0826706	0.0450093	0.408286	0.362681	0.999752	0.459883
ENSFDAG00000001851	0.0200985	0.0452044	0.00340664	-0.0343751	-0.054533	-0.267577	-0.328499	0.0770898	0.0168704	0.000937527	0.0208595	0.0270861	0.0296003	0.0302498	0.942293	0.727816	0.911411	0.811875	0.740381	0.119887	0.0589264	0.999752	0.286474
ENSFDAG00000001856	0.188101	-0.295747	-0.082972	2.03962	0.962562	1.10973	0.273766	3.85693	0.329623	0.0530915	0.750181	0.884598	1.09623	1.08488	0.923696	0.606467	0.718775	0.0185293	0.306107	0.289189	0.792675	0.999752	0.618624
ENSFDAG00000001859	0.489948	-0.258414	-0.0358413	-0.237638	0.327027	0.186759	-0.210299	0.330688	0.0527805	0.00424916	0.078042	0.0984171	0.111798	0.112946	0.394213	0.260669	0.582433	0.394963	0.297211	0.576467	0.531478	0.999752	0.525828
ENSFDAG00000001860	-0.826164	-0.161837	0.10886	-0.101058	-0.274197	0.283532	0.137745	0.183379	0.0175142	0.00250152	0.0366674	0.0437527	0.0533915	0.0530264	0.0536984	0.221377	0.0295152	0.59767	0.1899	0.2198	0.549721	0.999752	0.532614
ENSFDAG00000001861	-0.128374	0.295736	-0.0219176	0.735462	0.119143	0.463068	0.0429156	0.118674	0.0235793	0.00146987	0.0307004	0.0395468	0.0436968	0.0444848	0.709409	0.0541144	0.567538	2.6991e-05	0.549095	0.0267439	0.838764	0.999752	0.633287
ENSFDAG00000001871	0.159056	-0.0288004	-0.00411898	-0.239804	-0.0728461	-0.105173	-0.0586306	0.0626244	0.0119752	0.000781052	0.0159268	0.0204452	0.0226948	0.0230716	0.525044	0.792409	0.882829	0.057411	0.610429	0.485093	0.699498	0.999752	0.588014
ENSFDAG00000001874	0.110756	-0.107049	-0.0258706	0.655927	0.646209	0.170056	0.274006	1.75835	0.171524	0.0239417	0.353551	0.42283	0.514456	0.511288	0.933434	0.796039	0.867215	0.269968	0.32033	0.812585	0.70157	0.999752	0.588859
ENSFDAG00000001875	0.283777	-0.172656	-0.0231184	-0.542372	-0.2193	0.156398	1.04861	1.10128	0.189829	0.0139808	0.268007	0.340626	0.383054	0.388002	0.786842	0.691899	0.844985	0.294791	0.707102	0.800502	0.0922888	0.999752	0.312538
ENSFDAG00000001876	0.439106	-0.004566	-0.0451197	0.0277087	-0.23029	0.0683871	-0.468995	0.201704	0.0306132	0.0026111	0.0466956	0.058579	0.0669949	0.0675684	0.328215	0.97918	0.377243	0.89797	0.341356	0.791616	0.0711926	0.999752	0.298112
ENSFDAG00000001877	0.153875	0.0167032	-0.0170552	-0.139205	-0.0154062	0.0930206	0.27315	0.0610184	0.00964694	0.000785177	0.0143474	0.0180754	0.0205589	0.0207635	0.533333	0.864962	0.542751	0.245168	0.908769	0.516499	0.0580104	0.999752	0.286433
ENSFDAG00000001885	-0.278681	0.119434	0.0155454	0.0992472	0.21478	0.187494	0.236952	0.0887677	0.0236443	0.00103907	0.0265695	0.0348682	0.0373589	0.0386085	0.349601	0.437324	0.629623	0.542609	0.250056	0.332025	0.227849	0.999752	0.396825
ENSFDAG00000001887	-0.869244	0.258349	0.0855289	0.131514	-0.098524	0.147682	-0.444076	0.185396	0.0346506	0.00232162	0.0466827	0.059799	0.0665645	0.0676146	0.0435089	0.165175	0.075885	0.542731	0.687023	0.567044	0.0876734	0.999752	0.311482
ENSFDAG00000001888	-0.179355	0.428807	0.0113394	0.16217	0.21538	-0.293957	0.248055	0.172933	0.0134981	0.00239621	0.03295	0.0384879	0.0482858	0.0476518	0.666255	0.000223515	0.816812	0.371646	0.27227	0.180979	0.255815	0.999752	0.412947
ENSFDAG00000001890	0.143876	0.189085	-0.0404452	0.262534	-0.050652	-0.182442	-0.10337	0.243055	0.0191724	0.00336538	0.0464178	0.0542784	0.0679998	0.0671285	0.770414	0.17207	0.485685	0.223014	0.827887	0.484155	0.689916	0.999752	0.584087
ENSFDAG00000001892	0.840381	-0.121298	-0.0834146	-0.00843355	-0.28671	-0.218456	0.0142887	0.311936	0.0830879	0.00365138	0.0933672	0.12253	0.131282	0.135673	0.132407	0.673894	0.167455	0.977981	0.412746	0.546561	0.969056	0.999752	0.668911
ENSFDAG00000001897	0.378452	0.00129995	-0.0430447	-0.0230153	-0.0290454	-0.0108031	0.0316406	0.0298039	0.00249738	0.00041087	0.00577016	0.00678995	0.00843709	0.00834457	0.0283674	0.979247	0.0337056	0.7619	0.724472	0.906375	0.729063	0.999752	0.59689
ENSFDAG00000001898	0.395973	0.0193755	-0.0287121	-0.291922	-0.154781	0.112516	0.206054	0.177197	0.0228441	0.00234382	0.0387218	0.0477349	0.0558386	0.0560093	0.346874	0.897996	0.553138	0.13794	0.478675	0.633965	0.383938	0.999752	0.468847
ENSFDAG00000001901	0.0580594	0.0808067	-0.016259	0.0736114	0.126994	0.208696	0.172585	0.0614453	0.00664905	0.000828527	0.0127158	0.0153795	0.0184408	0.0183896	0.814812	0.321692	0.572169	0.513892	0.305822	0.124337	0.203134	0.999752	0.386092
ENSFDAG00000001902	1.10668	0.178451	-0.151469	0.140421	-0.202076	0.383789	0.0975674	1.55355	0.119859	0.0215437	0.295263	0.344474	0.432841	0.427006	0.3746	0.606241	0.30209	0.796082	0.730621	0.559659	0.881309	0.999752	0.645508
ENSFDAG00000001904	-5.11774	2.98677	0.444015	-0.361386	0.387124	0.640222	-0.891918	1.53273	0.118811	0.0212481	0.291603	0.340369	0.427414	0.421712	3.56877e-05	4.51083e-18	0.00231869	0.503349	0.506978	0.327442	0.169609	0.999752	0.366745
ENSFDAG00000001905	0.321765	0.0305731	-0.0427108	0.20231	-0.0764468	-0.08108	-0.158481	0.116467	0.0224341	0.00145068	0.0297155	0.0381714	0.0423338	0.0430481	0.345764	0.83826	0.262127	0.240549	0.695588	0.693532	0.444966	0.999752	0.49304
ENSFDAG00000001911	1.22233	0.0286644	-0.119496	-0.213745	-0.0766216	-0.108637	-0.671694	0.291924	0.0579368	0.00361647	0.0754812	0.0972215	0.107438	0.109371	0.0236782	0.905206	0.0469157	0.436572	0.805886	0.740315	0.0422499	0.999752	0.272291
ENSFDAG00000001912	0.17937	-0.045536	-0.0183543	-0.0309966	-0.0199621	0.0244613	0.17602	0.102364	0.0148246	0.00133387	0.0232917	0.0290746	0.033465	0.0336984	0.57505	0.70841	0.615279	0.839055	0.906804	0.893627	0.337627	0.999752	0.449335
ENSFDAG00000001913	-0.530911	-0.221256	0.0689288	-0.0540635	0.000825417	0.0383746	0.431741	0.224494	0.0597967	0.00262783	0.0671945	0.0881821	0.0944811	0.0976413	0.262493	0.365567	0.178745	0.834789	0.997782	0.900646	0.167071	0.999752	0.364874
ENSFDAG00000001914	-1.04334	-0.0506732	0.157821	-0.850767	-0.0334381	0.369114	0.366478	0.73189	0.0989045	0.00962451	0.162506	0.201355	0.233991	0.235077	0.222634	0.871993	0.107681	0.0348192	0.940598	0.445425	0.449732	0.999752	0.49523
ENSFDAG00000001915	0.0206436	0.112225	-0.000978396	-0.168637	-0.0302369	0.0187114	0.0828549	0.0983788	0.0154662	0.00126699	0.0230819	0.0290625	0.0330806	0.0334033	0.947524	0.366846	0.978071	0.267004	0.859221	0.91806	0.650304	0.999752	0.569975
ENSFDAG00000001924	2.6783	-1.05098	-0.27561	0.789131	0.124061	0.736972	-0.194732	3.76798	0.391513	0.0510084	0.770796	0.928156	1.1193	1.1147	0.16766	0.0930246	0.222342	0.368741	0.897537	0.486059	0.853668	0.999752	0.63729
ENSFDAG00000001929	-0.857006	0.457857	0.0618538	0.352977	-0.0785134	0.231377	0.231545	0.125751	0.0318165	0.00148638	0.0366084	0.0479616	0.0516374	0.0531676	0.0156605	0.0102622	0.108636	0.065062	0.719964	0.308577	0.315291	0.999752	0.440602
ENSFDAG00000001933	-0.532754	0.0261814	0.049137	0.102947	0.0484642	0.44132	0.250578	0.0565081	0.0150516	0.000661458	0.0169137	0.0221966	0.0237821	0.0245776	0.0250161	0.831013	0.0560628	0.428606	0.744958	0.00421343	0.109964	0.999752	0.324928
ENSFDAG00000001936	-0.432886	0.172912	0.05226	0.335148	-0.0895243	-0.472684	-1.18237	0.340041	0.0781284	0.00409619	0.0942225	0.122779	0.133475	0.136703	0.457877	0.536171	0.414189	0.274904	0.798342	0.195731	0.00138435	0.999752	0.204207
ENSFDAG00000001946	-0.317833	-0.240571	0.0599149	-0.246016	-0.389958	0.460759	0.996952	0.249663	0.022749	0.00341925	0.0493239	0.0585587	0.0719294	0.0713294	0.524714	0.110711	0.305535	0.267978	0.107078	0.0857985	0.00018933	0.999752	0.179077
ENSFDAG00000001947	-1.09198	0.417699	0.0860134	-0.190903	0.105595	0.452678	0.311955	0.0981244	0.0137463	0.00128435	0.0220629	0.0274432	0.0317323	0.031918	0.000490335	0.000367165	0.0163917	0.198712	0.523852	0.0110472	0.0807904	0.999752	0.304139
ENSFDAG00000001948	0.525399	-0.161697	-0.0376017	-0.548965	0.173358	0.36509	0.594	0.45094	0.0573796	0.00597402	0.0981155	0.120782	0.141546	0.141917	0.433978	0.499656	0.62662	0.0796757	0.617908	0.331847	0.114848	0.999752	0.329394
ENSFDAG00000001949	-0.480992	0.170203	0.0725803	-0.294965	-0.252461	-0.228693	-0.563261	0.315405	0.0334391	0.00426147	0.0648889	0.0783074	0.094166	0.0938414	0.391747	0.351974	0.266211	0.24689	0.366962	0.456117	0.0659583	0.999752	0.294209
ENSFDAG00000001950	0.773731	-0.343609	-0.0663829	0.116592	-0.0858069	-0.257244	-0.385734	0.225927	0.0479722	0.00276364	0.0602621	0.0780654	0.0855983	0.0873665	0.103563	0.116692	0.206681	0.634823	0.75876	0.379266	0.191888	0.999752	0.380989
ENSFDAG00000001954	0.120487	0.154467	-0.0115002	-0.126876	-0.303742	0.197408	-0.442787	0.118557	0.0314351	0.00138894	0.0353968	0.0464478	0.0497867	0.0514333	0.726395	0.383635	0.757643	0.500076	0.158728	0.376305	0.0508888	0.999752	0.278993
ENSFDAG00000001958	0.295054	-0.145524	-0.00909035	-0.195696	-0.174211	-0.27137	-0.512279	0.0745642	0.0172524	0.000896974	0.0207331	0.0270294	0.0293627	0.030083	0.279908	0.267895	0.761492	0.174116	0.289309	0.113269	0.00314128	0.999752	0.204207
ENSFDAG00000001962	0.290627	-0.0316737	-0.0439456	0.31396	-0.00140811	0.003036	-0.261745	0.28759	0.04563	0.00369869	0.0677148	0.0853414	0.0970209	0.097998	0.587862	0.882124	0.469932	0.227619	0.996154	0.992223	0.403087	0.999752	0.47689
ENSFDAG00000001963	-0.311943	-0.0131326	0.038134	-0.127851	-0.0255591	0.121007	0.30403	0.0949609	0.0181281	0.00118471	0.0241329	0.0309746	0.0343896	0.0349586	0.311402	0.922299	0.267898	0.41051	0.884533	0.514064	0.103935	0.999752	0.321544
ENSFDAG00000001964	-0.118195	0.171618	0.00957933	-0.200325	0.00596692	-0.0596831	0.0441752	0.198483	0.0528684	0.00232336	0.0594091	0.077965	0.0835341	0.0863282	0.790779	0.455433	0.842469	0.411145	0.982951	0.836401	0.880489	0.999752	0.645212
ENSFDAG00000001970	1.26254	-0.263707	-0.110634	-0.195267	-0.593776	-0.355011	-0.40693	0.189052	0.0425554	0.00228655	0.0518586	0.0674791	0.0735178	0.0752241	0.00368766	0.201132	0.0206871	0.391187	0.0222661	0.190426	0.137893	0.999752	0.346837
ENSFDAG00000001972	0.964908	-0.32299	-0.0712161	-0.666974	-0.0438716	-0.648703	0.103635	0.255901	0.0681623	0.00299546	0.0765951	0.100519	0.107699	0.111301	0.0564643	0.216037	0.193188	0.0159547	0.889944	0.048076	0.756075	0.999752	0.60594
ENSFDAG00000001973	0.590027	-0.0269852	-0.0632876	0.0853231	-0.141446	-0.0908744	-0.154997	0.0705501	0.0155951	0.00085632	0.0191825	0.0249275	0.0272114	0.0278205	0.0263252	0.828919	0.0305627	0.537864	0.370316	0.581708	0.352751	0.999752	0.45431
ENSFDAG00000001975	0.343975	-0.0261306	-0.0308758	-0.0969938	0.185572	0.00140304	-0.103349	0.482589	0.0675466	0.00631733	0.108474	0.134915	0.156019	0.156928	0.620493	0.919914	0.697672	0.768378	0.613403	0.997166	0.794178	0.999752	0.619161
ENSFDAG00000001982	-0.207541	-0.135477	0.0551422	-0.232528	-0.0409789	-0.129805	-0.378997	0.427239	0.0358781	0.00588885	0.0827572	0.0974056	0.120999	0.11968	0.750851	0.474462	0.472406	0.418918	0.895537	0.709026	0.273284	0.999752	0.421771
ENSFDAG00000001989	-1.09583	2.02838	-0.0120857	0.160535	-0.489953	1.37251	-0.815468	2.10907	0.244878	0.0282321	0.445724	0.543249	0.644923	0.644638	0.450511	4.15017e-05	0.942659	0.809976	0.506214	0.0874369	0.309791	0.999752	0.438305
ENSFDAG00000001991	0.555863	-0.106805	-0.0475334	-0.0100654	-0.121424	-0.110459	-0.646986	0.254521	0.0392491	0.00328725	0.059278	0.0744875	0.0850059	0.0857795	0.270545	0.589811	0.407074	0.967024	0.656391	0.704792	0.0271721	0.999752	0.256733
ENSFDAG00000001994	0.631759	-0.153465	-0.0700112	0.520999	-0.430751	-0.348014	-0.50504	1.2834	0.214561	0.0163731	0.308479	0.390863	0.441296	0.44653	0.577076	0.740411	0.584279	0.34822	0.490829	0.600362	0.449776	0.999752	0.49523
ENSFDAG00000001995	0.226631	-0.0600444	-0.0346249	0.183886	0.0358449	0.329715	0.253888	0.0989133	0.00467528	0.0014077	0.017304	0.0192758	0.0257122	0.0250309	0.471158	0.379862	0.356083	0.162142	0.796269	0.0397616	0.108552	0.999752	0.323573
ENSFDAG00000001998	-1.77959	0.547517	0.175099	-0.639931	0.627458	-0.644844	-0.56788	1.13403	0.112854	0.0154134	0.229243	0.274756	0.333359	0.331521	0.0946989	0.103141	0.158429	0.18137	0.231288	0.264055	0.323995	0.999752	0.442798
ENSFDAG00000001999	-0.018335	0.131336	-0.00347814	-0.127904	-0.0824613	0.0732431	0.126127	0.098424	0.0254901	0.00115818	0.0290123	0.0380438	0.0408685	0.0421461	0.953396	0.410724	0.918596	0.452701	0.67246	0.717125	0.538973	0.999752	0.528865
ENSFDAG00000002000	0.0816983	-0.124336	0.0150817	-0.327779	0.342297	-0.304491	-0.305298	0.279365	0.0146999	0.00395768	0.0495856	0.0557535	0.0734837	0.0717234	0.87716	0.305123	0.810536	0.141025	0.147152	0.261328	0.254298	0.999752	0.411839
ENSFDAG00000002009	0.82241	0.0752087	-0.0762791	-0.17013	0.0453499	0.06147	-0.0175643	0.338325	0.0212007	0.00475162	0.0617462	0.0705603	0.0910749	0.0893049	0.157388	0.605487	0.268473	0.493559	0.86444	0.838598	0.953131	0.999752	0.664633
ENSFDAG00000002010	-0.075753	0.0569533	-0.0215524	0.0443392	0.132654	0.012375	0.121764	0.308327	0.0116865	0.00442301	0.0526604	0.0576371	0.0786329	0.0761844	0.891485	0.598306	0.745886	0.846789	0.580573	0.9648	0.659105	0.999752	0.573495
ENSFDAG00000002013	0.267976	-0.0380904	-0.000307618	-0.234785	-0.152768	-0.3251	-0.368193	0.188617	0.0195693	0.00255373	0.0385684	0.0464347	0.0560092	0.0557765	0.537215	0.785401	0.995143	0.231887	0.47836	0.169539	0.118993	0.999752	0.334559
ENSFDAG00000002014	-0.149541	0.0310425	0.0187144	-0.1956	0.000663458	-0.0301948	0.240807	0.0843497	0.0121098	0.00110043	0.0191324	0.0238606	0.0274965	0.0276802	0.606626	0.777875	0.572652	0.157329	0.996573	0.85551	0.147789	0.999752	0.352119
ENSFDAG00000002016	0.680736	0.0494947	-0.0743932	-0.236534	-0.171416	0.113845	0.0571935	0.0815531	0.0107534	0.00107575	0.0179565	0.0221903	0.0258756	0.0259742	0.0171378	0.633153	0.0233182	0.077538	0.249846	0.479111	0.722683	0.999752	0.594875
ENSFDAG00000002021	0.120261	0.47068	-0.0456299	0.470389	0.181943	0.428947	-0.361152	0.695443	0.0941123	0.00914358	0.154489	0.19145	0.222437	0.22348	0.885335	0.124963	0.633227	0.231399	0.677541	0.363089	0.444891	0.999752	0.49304
ENSFDAG00000002030	2.62613	-0.72053	-0.254183	0.0124146	-0.833638	-0.279989	-0.749272	1.27811	0.148944	0.017102	0.270416	0.329715	0.391221	0.391096	0.0201837	0.0619038	0.0519355	0.980953	0.146556	0.654412	0.230873	0.999752	0.398181
ENSFDAG00000002032	0.367573	-0.505327	-0.0248057	0.35466	0.0644996	-0.243343	-0.0874494	0.611938	0.0945292	0.00790143	0.142614	0.179238	0.204501	0.206374	0.638439	0.100264	0.780198	0.347658	0.878911	0.590501	0.847351	0.999752	0.635663
ENSFDAG00000002034	1.08658	0.179987	-0.157051	0.704013	-0.0525714	0.0380387	-0.627364	0.66	0.0840134	0.00874324	0.143621	0.176807	0.207192	0.207737	0.181063	0.534623	0.0930368	0.0632141	0.900503	0.9334	0.16868	0.999752	0.365811
ENSFDAG00000002035	0.0883177	0.024848	-0.0107796	0.0421631	0.24401	-0.191022	-0.114218	0.262719	0.0158674	0.00369703	0.0476454	0.0542555	0.0703488	0.0689118	0.863197	0.843625	0.859283	0.846832	0.294835	0.4714	0.66349	0.999752	0.574878
ENSFDAG00000002038	2.89036	-2.35552	-0.190508	0.576259	1.20405	0.174181	1.40275	5.32035	0.606188	0.0713617	1.11795	1.35976	1.61856	1.61683	0.210173	0.00248303	0.475753	0.585745	0.301813	0.891102	0.269948	0.999752	0.420355
ENSFDAG00000002048	-0.8744	-0.784547	0.149695	-0.11468	-0.334924	-0.0519457	0.248127	0.625691	0.0847035	0.00822612	0.139011	0.172276	0.20015	0.20109	0.268974	0.00702452	0.0988462	0.758398	0.419709	0.907565	0.580043	0.999752	0.544009
ENSFDAG00000002049	-0.195167	0.0725305	0.0171456	-0.0540561	-0.0758685	-0.16941	-0.384668	0.22621	0.041634	0.0028403	0.056584	0.0723769	0.0807189	0.0819477	0.681552	0.722241	0.747669	0.820232	0.777937	0.550987	0.17903	0.999752	0.372389
ENSFDAG00000002053	-0.25236	0.0774968	0.0438425	0.357704	0.0120266	-0.662064	-1.36242	0.929312	0.0956825	0.0125913	0.18962	0.228106	0.275436	0.274223	0.79349	0.802174	0.696008	0.411389	0.979911	0.207127	0.00927587	0.999752	0.228594
ENSFDAG00000002055	0.288297	0.0915047	-0.0688403	0.405204	0.13003	0.0462506	-0.331173	0.386778	0.0429377	0.00520186	0.0806433	0.0978086	0.116854	0.116628	0.64296	0.658782	0.339844	0.153613	0.677577	0.892375	0.332178	0.999752	0.446805
ENSFDAG00000002056	0.32639	-0.0330463	-0.0534951	0.439972	0.0040854	0.0645843	0.0383891	0.173616	0.0317311	0.00218256	0.0432984	0.0553462	0.0617792	0.0627042	0.433436	0.852825	0.252181	0.0344804	0.986145	0.794987	0.878157	0.999752	0.645013
ENSFDAG00000002064	-0.396043	-0.0144398	0.0250555	-0.0269867	0.188663	0.335994	0.107607	0.200151	0.0260357	0.00264456	0.0438689	0.0541326	0.0632429	0.0634552	0.376025	0.928692	0.626102	0.897479	0.417434	0.18153	0.669251	0.999752	0.576446
ENSFDAG00000002073	0.0853622	-0.392251	0.0255764	-0.564585	-0.510051	0.111238	0.690885	0.131041	0.0240085	0.00164664	0.0327147	0.0418273	0.0466747	0.0473777	0.81358	0.011357	0.528506	0.00179955	0.0126339	0.606633	0.00150308	0.999752	0.204207
ENSFDAG00000002074	-0.534562	0.0328411	0.077359	0.0328001	-0.411837	-0.011625	0.366774	0.156298	0.0131439	0.0021541	0.0302852	0.0356511	0.0442778	0.0437972	0.17633	0.77453	0.0955585	0.850502	0.029171	0.955943	0.0796759	0.999752	0.303682
ENSFDAG00000002076	-0.186518	0.109085	0.0161916	-0.164319	0.162888	0.224036	0.132387	0.111862	0.0125482	0.00150284	0.0233955	0.0284076	0.0338891	0.0338354	0.577068	0.330152	0.676189	0.282692	0.333826	0.223607	0.471702	0.999752	0.503275
ENSFDAG00000002080	-1.3193	1.14318	0.0931095	-0.00173988	0.730991	0.0166794	-1.07818	0.466187	0.0431971	0.00637577	0.0924917	0.110006	0.134809	0.133756	0.0533294	3.79117e-08	0.243583	0.995435	0.0275271	0.963766	0.00319802	0.999752	0.204207
ENSFDAG00000002082	0.0603299	0.037685	-0.0145854	0.0115997	0.0357012	0.138131	0.366175	0.052705	0.00919247	0.000667801	0.0128886	0.0164	0.0184149	0.0186603	0.792713	0.694279	0.572474	0.918618	0.780414	0.308722	0.00734937	0.999752	0.228594
ENSFDAG00000002087	0.236156	-0.00407538	-0.0312206	0.355081	0.119918	-0.000801968	-0.0964922	0.155415	0.0147599	0.00212109	0.0310303	0.0370038	0.0451915	0.0448742	0.549149	0.97324	0.497839	0.0438271	0.533028	0.99699	0.648745	0.999752	0.569112
ENSFDAG00000002088	0.657039	-0.385735	-0.0791614	0.458231	0.0770423	-0.0135753	-0.299205	0.749513	0.105892	0.00979935	0.169032	0.210444	0.243049	0.244541	0.447895	0.235868	0.423897	0.265043	0.866628	0.978032	0.545144	0.999752	0.530396
ENSFDAG00000002089	0.0930803	-0.0670715	-0.00861789	-0.158193	0.0698815	0.0363056	-0.0570252	0.094535	0.0153325	0.00121176	0.0224505	0.0283585	0.0321456	0.0324934	0.762092	0.588048	0.804469	0.291069	0.678161	0.83953	0.751736	0.999752	0.604418
ENSFDAG00000002097	-0.0295845	0.156091	-0.0112475	0.0241508	0.205599	0.165646	-0.00274847	0.115607	0.00691581	0.00162766	0.0209324	0.0238149	0.030915	0.0302756	0.930663	0.0605227	0.780408	0.867429	0.182768	0.346141	0.987397	0.999752	0.672991
ENSFDAG00000002099	0.663888	-0.171483	-0.0509364	-0.263322	-0.227074	-0.00763393	0.0460877	0.107484	0.00876808	0.00148469	0.0206816	0.0242684	0.0302658	0.029909	0.0428686	0.0670501	0.186189	0.067096	0.144943	0.965	0.78986	0.999752	0.617808
ENSFDAG00000002112	0.609828	1.2284	-0.136558	0.422848	-0.288772	-0.11441	-0.689087	1.33255	0.192026	0.0173757	0.30266	0.377605	0.434923	0.437883	0.597303	0.00505924	0.300217	0.442124	0.638403	0.862272	0.297715	0.999752	0.433214
ENSFDAG00000002113	0.218715	-0.167254	-0.00866612	-0.117561	-0.0756598	-0.201692	0.0966779	0.0326194	0.00502343	0.000421375	0.0075932	0.00954011	0.0108892	0.0109878	0.225898	0.0182847	0.672899	0.177297	0.438565	0.0532598	0.356374	0.999752	0.45609
ENSFDAG00000002118	-0.18078	-0.0683881	0.030283	-0.180672	0.0565936	-0.120454	-0.101368	0.0430099	0.0114562	0.000503454	0.0128735	0.0168944	0.0181012	0.0187067	0.383373	0.522861	0.17713	0.111303	0.663267	0.370626	0.458607	0.999752	0.498699
ENSFDAG00000002119	1.19668	-0.414429	-0.124078	0.133367	0.0307024	0.0775275	0.194865	0.108325	0.0279764	0.00127537	0.0318832	0.0418043	0.04492	0.0463152	0.000276991	0.0132221	0.000512036	0.45512	0.880636	0.714519	0.365219	0.999752	0.461169
ENSFDAG00000002123	0.00325647	0.0529558	-0.00425773	0.169007	0.0928816	-0.184654	-0.0595557	0.171824	0.036784	0.00209854	0.0460085	0.0596399	0.0653348	0.0667067	0.993732	0.782462	0.925948	0.430739	0.7037	0.470039	0.817634	0.999752	0.627904
ENSFDAG00000002126	-0.0983645	0.035349	0.00942234	-0.120151	0.0927553	-0.101261	0.0840549	0.0930554	0.0169301	0.00117073	0.0231623	0.0295943	0.0330529	0.0335424	0.747109	0.785873	0.783025	0.429835	0.589762	0.577544	0.64627	0.999752	0.568435
ENSFDAG00000002127	0.104456	-0.0648091	-0.0177376	0.255124	0.189398	0.00548886	0.0587191	0.0494726	0.0121348	0.000588322	0.0141702	0.0185375	0.0200187	0.020573	0.638622	0.556312	0.464605	0.0320969	0.164203	0.969055	0.682258	0.999752	0.581911
ENSFDAG00000002130	-0.527158	0.235243	0.027295	0.231122	0.0753264	0.324388	0.368531	0.140195	0.0127604	0.00192021	0.0276897	0.0328701	0.0403814	0.0400432	0.159158	0.0372976	0.53336	0.164852	0.677793	0.106471	0.0655245	0.999752	0.294158
ENSFDAG00000002131	-0.112758	0.0274991	0.0159372	-0.265683	0.133782	-0.0591359	0.204353	0.100007	0.0159176	0.00128557	0.023576	0.0297227	0.0337762	0.03412	0.721422	0.827459	0.656687	0.0835713	0.437758	0.747627	0.268593	0.999752	0.420054
ENSFDAG00000002135	0.864583	0.0681086	-0.091011	0.116661	-0.28309	-0.24224	-0.523452	0.176258	0.0386233	0.00214301	0.0477232	0.061975	0.067718	0.0692077	0.0394598	0.728923	0.0492997	0.593325	0.255478	0.351915	0.0466178	0.999752	0.276729
ENSFDAG00000002147	-1.64756	0.635723	0.152126	0.073595	0.108861	0.076013	-0.128332	0.287348	0.0221212	0.00398536	0.0545869	0.0636708	0.0800272	0.0789432	0.00211539	1.91748e-05	0.0159642	0.752765	0.666162	0.78816	0.647851	0.999752	0.568881
ENSFDAG00000002149	1.02876	-0.0560143	-0.116306	-0.249676	-0.00868986	0.241843	0.267496	0.164709	0.0282467	0.00209272	0.04	0.0508125	0.0571792	0.0579078	0.0112492	0.73892	0.0110091	0.211891	0.969249	0.311835	0.26631	0.999752	0.418485
ENSFDAG00000002150	0.22803	-0.165288	-0.0207939	0.289227	-0.208001	0.247239	0.260243	0.302691	0.0385922	0.00400908	0.0659026	0.0811448	0.0950683	0.0953235	0.67853	0.400137	0.742603	0.259892	0.465275	0.422633	0.399281	0.999752	0.475018
ENSFDAG00000002151	0.412985	0.101543	-0.0202278	-0.112561	-0.0453177	-0.718956	-1.50385	0.761777	0.148199	0.00947154	0.195218	0.250995	0.278032	0.282826	0.636089	0.791955	0.835351	0.798909	0.927925	0.172726	0.00468715	0.999752	0.208113
ENSFDAG00000002152	0.13987	-0.0908327	-0.00689977	-0.0878364	-0.00480005	-0.0549058	-0.0764479	0.0766682	0.0178797	0.00092085	0.0214023	0.0279161	0.0303012	0.0310564	0.613456	0.496948	0.820133	0.548237	0.977081	0.752443	0.664433	0.999752	0.575522
ENSFDAG00000002153	2.95527	-1.18316	-0.267643	0.96277	1.42097	0.10235	1.42828	14.8653	0.745179	0.211041	2.62065	2.93406	3.88846	3.79076	0.44338	0.170499	0.56016	0.552025	0.406786	0.958606	0.463201	0.999752	0.500503
ENSFDAG00000002161	0.104591	0.0265774	-0.00823202	-0.0494658	0.0627292	0.0103074	0.170736	0.121617	0.00841056	0.00169842	0.0226029	0.0260796	0.0332441	0.0326895	0.764242	0.771969	0.841677	0.74214	0.697694	0.954918	0.345005	0.999752	0.451961
ENSFDAG00000002163	-0.0915607	0.14256	0.00797795	-0.137049	-0.0654174	-0.0239027	-0.0275424	0.115946	0.0308837	0.00135722	0.0347045	0.0455441	0.0487974	0.0504296	0.788012	0.417247	0.828556	0.46193	0.759199	0.913833	0.902386	0.999752	0.650999
ENSFDAG00000002171	1.09428	-0.679326	-0.0960116	0.228832	-0.140984	0.0433748	-0.302675	0.416455	0.067219	0.00534211	0.0987139	0.12463	0.141363	0.14287	0.0899458	0.00878816	0.188977	0.466413	0.689632	0.908157	0.423266	0.999752	0.484323
ENSFDAG00000002172	0.588924	-0.440573	-0.0543273	-0.0384682	0.0970492	0.825741	0.812166	0.419682	0.0348336	0.00578973	0.0810733	0.0953065	0.11858	0.117245	0.363311	0.0182464	0.475236	0.892531	0.753246	0.0164877	0.0176966	0.999752	0.250094
ENSFDAG00000002175	0.5454	-0.21005	-0.0393041	0.343422	-0.306823	-0.431273	-0.731386	0.594261	0.084404	0.00776404	0.134273	0.167263	0.193037	0.194257	0.479255	0.469676	0.655553	0.348654	0.453123	0.326301	0.0970294	0.999752	0.318752
ENSFDAG00000002185	0.0310443	-0.140958	-0.00136294	0.395664	-0.287254	0.120063	-0.37581	0.401512	0.0550059	0.00527073	0.0895734	0.11115	0.128921	0.129578	0.960925	0.54783	0.985022	0.186162	0.388902	0.738088	0.296483	0.999752	0.432559
ENSFDAG00000002189	0.635476	-0.264914	-0.0794081	0.562959	0.22582	0.184659	-0.510859	0.666276	0.0828279	0.00885098	0.143871	0.17666	0.20771	0.208092	0.43626	0.35732	0.398641	0.137758	0.59108	0.68535	0.262762	0.999752	0.416957
ENSFDAG00000002195	0.0507117	-0.0137541	-0.00621484	-0.0455191	0.0416887	0.141725	0.372042	0.0508839	0.00763373	0.000659797	0.011729	0.0146959	0.0168337	0.0169712	0.822126	0.874913	0.808819	0.674264	0.730928	0.274684	0.00429221	0.999752	0.206002
ENSFDAG00000002201	0.0914419	0.0343035	-0.0111988	0.206185	-0.273217	0.146104	0.205732	0.132156	0.030671	0.00158883	0.0368028	0.0479887	0.0521149	0.0534011	0.801399	0.844709	0.778747	0.282477	0.212322	0.522171	0.373315	0.999752	0.463939
ENSFDAG00000002202	-0.314478	0.115236	0.0387466	-0.19946	-0.0917362	0.157816	0.402647	0.130358	0.013839	0.00176106	0.0268291	0.0323818	0.0389324	0.0387999	0.383751	0.327298	0.355847	0.223325	0.6102	0.423813	0.0409402	0.999752	0.270694
ENSFDAG00000002205	-0.507322	0.230923	0.0471232	-0.172506	-0.075983	0.380094	-0.0137924	0.0912703	0.0164709	0.00114987	0.0226398	0.0289041	0.032315	0.0327843	0.0931004	0.0719685	0.16463	0.251596	0.654928	0.0344802	0.939281	0.999752	0.660713
ENSFDAG00000002208	0.639444	-0.151756	-0.0572471	0.418867	-0.00258346	-0.241002	0.115954	0.500812	0.089189	0.00632359	0.123537	0.157516	0.176399	0.178878	0.36622	0.61135	0.471587	0.233367	0.994806	0.566092	0.783961	0.999752	0.616496
ENSFDAG00000002209	0.0708013	-0.162016	0.00301006	-0.0286164	-0.0946376	-0.332742	-0.270578	0.275593	0.0393042	0.00359865	0.0623617	0.077718	0.0896428	0.0902215	0.892717	0.413802	0.959981	0.908768	0.734255	0.266419	0.367685	0.999752	0.461945
ENSFDAG00000002211	-0.181438	0.0649683	0.0345946	-0.36473	-0.0790392	-0.0863095	-0.327391	0.120418	0.0225421	0.00150751	0.0303422	0.0388732	0.0432627	0.0439477	0.601075	0.66522	0.372929	0.0362722	0.688507	0.678174	0.118357	0.999752	0.334074
ENSFDAG00000002222	0.337537	-0.126704	-0.0291425	0.0631447	0.0440812	-0.0533164	-0.0887747	0.100843	0.0228861	0.00121772	0.0277733	0.0361599	0.0393615	0.0402901	0.28782	0.402292	0.403645	0.704763	0.816683	0.788133	0.658292	0.999752	0.573495
ENSFDAG00000002224	-1.11412	0.267986	0.11204	0.0469493	-0.138701	0.136975	0.182943	0.110959	0.0243888	0.00134829	0.0300873	0.0390814	0.0426887	0.0436334	0.000823847	0.086162	0.00227865	0.786646	0.482923	0.507359	0.381138	0.999752	0.467771
ENSFDAG00000002230	-0.319857	-0.201594	0.0327986	0.140537	0.323096	-0.0737275	0.0921653	0.164985	0.0243549	0.00214418	0.0378034	0.0472852	0.0542831	0.0546968	0.431006	0.196438	0.478751	0.469795	0.137324	0.751665	0.69352	0.999752	0.585463
ENSFDAG00000002232	-0.132878	0.0400329	0.00647473	0.165506	0.14241	0.0126082	-0.0306217	0.0490888	0.0104458	0.000600227	0.0131069	0.0169821	0.0186162	0.0190025	0.548681	0.695285	0.791564	0.148277	0.274476	0.926374	0.824206	0.999752	0.629921
ENSFDAG00000002234	-1.11072	0.312901	0.107943	-0.0287539	0.197468	0.102801	-0.0445491	0.181813	0.0468388	0.00214159	0.053441	0.0700642	0.0753039	0.0776292	0.00918981	0.148238	0.0196729	0.901012	0.455657	0.707944	0.872966	0.999752	0.64354
ENSFDAG00000002238	-0.904194	0.0266171	0.0873711	0.768399	0.365884	0.159363	0.284253	0.169071	0.0126526	0.00234938	0.0319259	0.0371309	0.0468455	0.0461714	0.0278774	0.812943	0.0714563	1.70444e-05	0.0575926	0.461549	0.185878	0.999752	0.377116
ENSFDAG00000002239	0.475457	-0.062858	-0.0561239	0.294659	-0.0433488	0.0899836	-0.467812	0.222752	0.0349656	0.0028694	0.0522318	0.065755	0.0748613	0.0755878	0.313744	0.736754	0.29476	0.197296	0.865758	0.742248	0.0888394	0.999752	0.311724
ENSFDAG00000002241	-0.290301	0.0953703	0.0328555	-0.226946	-0.0860785	0.118626	0.147316	0.0460451	0.00870998	0.000575381	0.0116549	0.0149464	0.0166128	0.0168821	0.176096	0.306833	0.170775	0.0355388	0.481378	0.357385	0.25688	0.999752	0.413345
ENSFDAG00000002244	-1.7792	1.19145	0.129901	1.13887	0.69241	-0.744578	-0.945927	1.96636	0.180711	0.0269113	0.389315	0.462628	0.567585	0.563005	0.204513	0.00506695	0.428446	0.0679614	0.308679	0.322999	0.207428	0.999752	0.388032
ENSFDAG00000002252	-0.160199	-0.839879	0.0613104	0.0397492	-0.209304	-0.00206199	0.240364	0.413899	0.0897819	0.00504225	0.111523	0.144715	0.158302	0.161715	0.803355	0.00506308	0.387907	0.905254	0.582183	0.995865	0.550029	0.999752	0.532703
ENSFDAG00000002254	1.17021	-0.360465	-0.148705	1.64753	0.58962	-0.102487	0.27804	1.69178	0.260017	0.0218606	0.393517	0.494313	0.564369	0.569441	0.368287	0.479624	0.314532	0.00863094	0.401677	0.891487	0.712535	0.999752	0.592768
ENSFDAG00000002257	0.041788	-0.0170523	-0.011458	0.108219	0.0861495	0.236316	0.217387	0.0440917	0.00414423	0.000602292	0.00877978	0.0104583	0.0127909	0.0126968	0.842255	0.791097	0.640585	0.248113	0.39956	0.0366625	0.0537008	0.999752	0.281544
ENSFDAG00000002259	-0.842515	-0.359614	0.153828	-0.643808	-0.862459	-0.0429741	0.0846562	1.05275	0.0783079	0.0146346	0.198541	0.230768	0.291376	0.287132	0.411569	0.19876	0.203523	0.148492	0.0725968	0.936546	0.874468	0.999752	0.643947
ENSFDAG00000002261	-0.440578	0.133074	0.0331069	0.213759	0.127512	-0.0797285	0.172842	0.02401	0.00396308	0.000306926	0.00574167	0.00726566	0.00821689	0.00831075	0.00446451	0.0345269	0.0587934	0.0047872	0.134669	0.379104	0.0579658	0.999752	0.286433
ENSFDAG00000002265	-0.12072	-0.101665	0.0167465	0.0690893	0.192648	-0.712074	-0.133765	0.37607	0.0482825	0.00497683	0.0820675	0.101125	0.118361	0.118706	0.843942	0.643598	0.812361	0.809422	0.544642	0.0384742	0.697836	0.999752	0.587471
ENSFDAG00000002274	0.367837	-0.0623331	-0.0427151	0.0481777	-0.0718462	0.0469053	-0.00343132	0.156063	0.0139694	0.00214045	0.030696	0.036374	0.0447896	0.0443908	0.351792	0.597924	0.355866	0.783329	0.706388	0.8246	0.987006	0.999752	0.672913
ENSFDAG00000002277	0.262549	-0.293597	-0.0181733	-0.146215	0.0586702	-0.0377454	0.45261	0.0965988	0.0257302	0.00113074	0.0289135	0.0379443	0.0406547	0.0420146	0.398255	0.0672002	0.58889	0.38985	0.763268	0.851503	0.0272352	0.999752	0.256733
ENSFDAG00000002278	-1.00404	0.256926	0.112382	-0.640755	0.078497	0.033601	0.35506	0.229729	0.061191	0.0026891	0.0687613	0.0902383	0.0966841	0.099918	0.0361887	0.298974	0.0302216	0.0145438	0.793853	0.913946	0.261328	0.999752	0.415822
ENSFDAG00000002280	-0.82754	-0.188069	0.105514	-0.3001	-0.0319027	0.386536	0.453254	0.199015	0.0295424	0.00258443	0.0456944	0.0571892	0.0656029	0.0661152	0.0635949	0.27387	0.0379376	0.160351	0.893873	0.131264	0.0779427	0.999752	0.302375
ENSFDAG00000002281	0.357758	0.195384	-0.0483141	-0.00280718	-0.174733	0.288344	-0.153232	0.0585185	0.00946891	0.000750363	0.0138844	0.017534	0.0198817	0.0200953	0.139164	0.0446553	0.077773	0.980993	0.186977	0.0408594	0.279722	0.999752	0.424657
ENSFDAG00000002285	-0.27706	0.0835511	0.0240288	-0.163589	0.184734	-0.372795	-0.590184	0.178409	0.0165046	0.00244033	0.0353819	0.0420745	0.0515725	0.0511672	0.511861	0.515464	0.626672	0.384469	0.367794	0.100678	0.00907799	0.999752	0.228594
ENSFDAG00000002291	-0.410231	-0.206948	0.0471487	0.281297	0.128042	-0.169644	-0.0270355	0.295845	0.0317059	0.00399298	0.0610532	0.0737651	0.0885685	0.0882947	0.450718	0.245142	0.455581	0.254936	0.637325	0.568657	0.927505	0.999752	0.657415
ENSFDAG00000002299	-2.20778	0.361125	0.234743	-0.0184069	0.304495	-0.0408919	-0.0997652	0.461914	0.09819	0.00564913	0.123272	0.159705	0.175094	0.178719	0.00116039	0.249134	0.00178883	0.958189	0.446096	0.922151	0.81344	0.999752	0.626455
ENSFDAG00000002300	-0.204441	-0.228985	0.0329981	-0.332491	-0.134292	0.669417	0.876787	0.141612	0.0301492	0.00173137	0.0378198	0.0490035	0.053716	0.0548315	0.586941	0.187245	0.427757	0.0873217	0.544085	0.00387306	0.000180845	0.999752	0.179077
ENSFDAG00000002303	0.411838	-0.00652654	-0.0457955	0.0256691	0.041081	-0.082802	-0.228303	0.047025	0.0125257	0.000550453	0.0140753	0.0184716	0.019791	0.020453	0.0575432	0.953497	0.0509474	0.828705	0.762449	0.556142	0.110407	0.999752	0.325138
ENSFDAG00000002311	0.303396	0.0410359	-0.0650419	0.56922	0.43874	0.463607	-0.265616	0.38058	0.0850477	0.00460959	0.104027	0.13529	0.147512	0.150887	0.622862	0.888097	0.338067	0.0775891	0.232941	0.227401	0.494101	0.999752	0.510469
ENSFDAG00000002313	0.438418	-0.0188343	-0.0519882	0.313174	-0.316469	-0.0984189	-0.269076	0.538376	0.0971584	0.00678269	0.133546	0.170498	0.190617	0.193386	0.550167	0.951818	0.527875	0.391457	0.443422	0.821651	0.54062	0.999752	0.529622
ENSFDAG00000002315	0.429183	-0.119595	-0.0417387	0.039884	0.116301	-0.315311	-0.107668	0.063008	0.0148215	0.00075549	0.0176654	0.0230546	0.025002	0.0256362	0.0873033	0.325927	0.12888	0.764116	0.443703	0.0461383	0.501299	0.999752	0.51297
ENSFDAG00000002317	4.26896	-0.395023	-0.392611	-0.505483	-0.12214	0.501048	0.874648	5.23899	0.28184	0.0741443	0.932897	1.05102	1.38172	1.34938	0.0621696	0.456827	0.149341	0.600733	0.905166	0.669922	0.45148	0.999752	0.495896
ENSFDAG00000002318	-0.369863	-0.0417341	0.0427527	0.0821329	-0.0964592	-0.164043	-0.154278	0.129578	0.0136372	0.001752	0.0266029	0.0320785	0.0386149	0.0384725	0.304194	0.720809	0.307064	0.614569	0.590188	0.403833	0.431543	0.999752	0.486664
ENSFDAG00000002323	1.32989	-0.580205	-0.109309	-0.453368	0.486661	-0.449732	0.207856	1.35572	0.241713	0.017115	0.33458	0.426654	0.477732	0.484467	0.253385	0.237947	0.403412	0.433162	0.456238	0.515259	0.765224	0.999752	0.610292
ENSFDAG00000002324	-1.16979	0.698616	0.0754995	0.186575	0.369337	0.0621823	-0.258149	0.208545	0.0213202	0.00282747	0.0424687	0.0510489	0.0617029	0.0614168	0.0104198	1.71352e-06	0.155648	0.365277	0.102119	0.802332	0.297569	0.999752	0.433214
ENSFDAG00000002327	-0.977932	-0.10955	0.0971472	-0.0704033	0.230712	0.166639	0.0837594	0.541076	0.0417657	0.00750306	0.102846	0.119994	0.150765	0.148735	0.183692	0.591927	0.262062	0.826235	0.505395	0.667803	0.828065	0.999752	0.631139
ENSFDAG00000002328	0.699395	-0.250278	-0.0672362	0.160011	0.0479646	-0.277501	-0.354716	0.222801	0.050166	0.00269458	0.0611244	0.0795374	0.0866526	0.0886649	0.138417	0.263814	0.19523	0.517498	0.864953	0.345834	0.233554	0.999752	0.399382
ENSFDAG00000002330	-1.47595	-0.519848	0.197213	-0.273522	0.435723	-0.0927046	-0.181299	0.496885	0.07492	0.00643834	0.114749	0.143852	0.164666	0.166039	0.0362744	0.0575344	0.0139785	0.419406	0.25063	0.819293	0.656371	0.999752	0.572559
ENSFDAG00000002331	-0.360258	0.334487	-0.00149417	0.147534	0.382913	1.1023	0.193273	0.912334	0.119087	0.0120494	0.200196	0.247127	0.288577	0.28958	0.706047	0.332409	0.98914	0.7416	0.441142	0.0401736	0.719477	0.999752	0.59388
ENSFDAG00000002337	0.42201	-0.0443556	-0.0324797	-0.277014	-0.0526744	-0.0301853	-0.0216807	0.0621708	0.00853622	0.000815894	0.0138805	0.0172282	0.0199764	0.0200798	0.0905501	0.631169	0.2555	0.0187101	0.688193	0.830884	0.878398	0.999752	0.645013
ENSFDAG00000002338	0.635772	-0.158195	-0.0764109	0.377089	-0.0186481	-0.0288042	-0.380462	0.502695	0.0842761	0.00641033	0.120964	0.153312	0.173031	0.1751	0.369877	0.585801	0.339898	0.278268	0.962014	0.944794	0.363235	0.999752	0.460054
ENSFDAG00000002340	0.178968	0.0175087	-0.0260419	0.0610755	0.0809822	-0.0273517	0.154436	0.0619385	0.00507144	0.000855328	0.0119279	0.014002	0.0174536	0.0172497	0.472074	0.805791	0.373227	0.57601	0.493738	0.835983	0.23965	0.999752	0.403043
ENSFDAG00000002346	0.856995	-0.0904708	-0.0950748	0.011433	0.170759	-0.220579	-0.502329	0.261879	0.0523982	0.00323941	0.0679616	0.087599	0.0967115	0.0984813	0.094	0.692673	0.094831	0.965019	0.563977	0.478144	0.109442	0.999752	0.324399
ENSFDAG00000002349	-0.5435	0.168346	0.00680871	0.990338	0.723167	0.383884	0.0284042	0.68864	0.0773719	0.00925022	0.144095	0.174995	0.208715	0.208395	0.512505	0.545034	0.943563	0.00908309	0.0838585	0.400752	0.950387	0.999752	0.663956
ENSFDAG00000002350	1.09349	-0.71744	-0.0854028	-0.298227	0.0916463	-0.107946	-0.419265	0.959625	0.175415	0.0120633	0.239339	0.305939	0.341493	0.346608	0.264312	0.0867161	0.436823	0.542131	0.868401	0.853448	0.476374	0.999752	0.504411
ENSFDAG00000002351	-0.451948	0.760713	0.0428605	0.374995	-0.515935	-1.45549	-0.330592	1.12704	0.184595	0.0144247	0.268691	0.339741	0.384612	0.388903	0.670316	0.076634	0.721193	0.469414	0.376071	0.0189294	0.59603	0.999752	0.549796
ENSFDAG00000002355	-1.93035	0.183697	0.208092	-0.00832206	0.164821	-0.234068	-0.448559	0.354785	0.0566843	0.0045581	0.0837621	0.105642	0.119988	0.121225	0.00119192	0.440375	0.00205466	0.97706	0.612084	0.499213	0.197635	0.999752	0.384443
ENSFDAG00000002357	-0.0169444	-0.111018	0.022729	-0.297603	-0.00694556	-0.103429	-0.223529	0.109603	0.0171128	0.00141298	0.0256476	0.03227	0.0367654	0.0371155	0.959181	0.396073	0.545404	0.0631278	0.969158	0.5896	0.245942	0.999752	0.406866
ENSFDAG00000002358	-1.18926	0.189987	0.0954865	0.676811	1.0512	0.277872	-0.185661	0.794326	0.211578	0.00929802	0.237754	0.312014	0.334302	0.345483	0.182082	0.67958	0.32205	0.165123	0.0598496	0.630807	0.752102	0.999752	0.60457
ENSFDAG00000002360	-3.28945	1.08632	0.342898	0.1475	-0.48721	0.0308043	0.650549	1.62534	0.148087	0.0222599	0.321099	0.381215	0.468262	0.464355	0.00987465	0.00475873	0.0215456	0.794633	0.430055	0.964095	0.339743	0.999752	0.44993
ENSFDAG00000002364	0.0563508	0.0568115	-0.0100656	-0.0658325	0.0523898	-0.0278883	0.0773905	0.0766056	0.0105413	0.00100504	0.0171164	0.0212496	0.0246317	0.024761	0.838669	0.580033	0.750862	0.614829	0.7193	0.858962	0.622849	0.999752	0.55932
ENSFDAG00000002374	-0.343253	0.0745752	0.0222991	0.162649	0.26672	-0.0263936	0.0540862	0.202344	0.0372046	0.00254107	0.0505927	0.0647073	0.0721742	0.0732704	0.445416	0.699029	0.658226	0.46961	0.294397	0.921738	0.841627	0.999752	0.634289
ENSFDAG00000002377	0.935468	0.0432474	-0.101341	-0.270312	0.126625	0.0444937	0.192943	0.223294	0.0196915	0.00306619	0.0437595	0.0517719	0.0638814	0.0632826	0.0477418	0.757937	0.0672286	0.196289	0.577863	0.860262	0.443091	0.999752	0.492708
ENSFDAG00000002379	0.190345	0.0192182	-0.0165338	-0.0729111	-0.0189546	-0.104039	-0.277771	0.0472924	0.0125969	0.000553583	0.0141553	0.0185766	0.0199036	0.0205693	0.381422	0.864042	0.482231	0.539995	0.889395	0.46085	0.0527736	0.999752	0.281026
ENSFDAG00000002387	-1.6286	0.230516	0.176816	0.423227	0.390662	-0.528947	0.246934	1.02429	0.151773	0.0133049	0.235022	0.294087	0.337437	0.340052	0.107578	0.55405	0.125299	0.382658	0.471289	0.36252	0.671963	0.999752	0.577355
ENSFDAG00000002389	0.292302	0.00819004	-0.0468327	0.15419	0.159845	0.0717751	-0.12621	0.205729	0.0329378	0.00264227	0.0486103	0.061321	0.0696293	0.070352	0.519288	0.964006	0.362248	0.484336	0.518606	0.785618	0.634194	0.999752	0.563128
ENSFDAG00000002392	0.133355	-0.0252525	-0.00106262	-0.277931	-0.123749	-0.152702	-0.124808	0.116243	0.019074	0.00148733	0.0277328	0.0350727	0.0396952	0.0401406	0.695697	0.854919	0.978018	0.0951291	0.508753	0.443418	0.533321	0.999752	0.526408
ENSFDAG00000002400	-0.652967	-0.450649	0.0831014	0.0524721	0.311475	0.0754585	0.85219	0.770654	0.205273	0.00902092	0.230668	0.302715	0.324339	0.335187	0.456992	0.319904	0.381602	0.913002	0.571314	0.894591	0.141035	0.999752	0.349084
ENSFDAG00000002401	0.506701	-0.134649	-0.0596502	0.364086	0.121098	-0.185622	-0.00845318	0.148124	0.0280962	0.00185006	0.0375379	0.0481512	0.0535019	0.0543745	0.187987	0.421801	0.165498	0.0602195	0.581041	0.422263	0.971082	0.999752	0.669177
ENSFDAG00000002405	3.3482	-0.44692	-0.398117	0.255724	-0.173727	2.62222	2.9108	6.8294	0.461987	0.0955007	1.26391	1.45513	1.86015	1.82795	0.20012	0.510841	0.197651	0.820062	0.885486	0.0545268	0.0313242	0.999752	0.258813
ENSFDAG00000002406	0.107696	0.018609	-0.0196489	0.107376	0.0631841	0.0626978	-0.0206431	0.177149	0.0140523	0.00245187	0.0338731	0.0396323	0.0496138	0.0489866	0.798047	0.875259	0.691503	0.559611	0.750953	0.77834	0.92569	0.999752	0.657079
ENSFDAG00000002413	0.0926084	-0.0968847	0.00140451	0.042749	-0.240866	-0.0928609	0.258234	0.134441	0.0141263	0.00181802	0.0275886	0.0332613	0.0400479	0.0398981	0.800599	0.414983	0.973722	0.796892	0.186599	0.642629	0.196074	0.999752	0.383826
ENSFDAG00000002414	0.125359	-0.248601	-0.010477	0.00236949	0.152177	0.00748991	0.521479	0.234364	0.0292504	0.00311192	0.0506717	0.0622468	0.0731468	0.0732909	0.795677	0.146064	0.851024	0.991601	0.541898	0.977907	0.0540737	0.999752	0.282116
ENSFDAG00000002416	0.177061	-0.126188	-0.0102656	-0.133207	0.143125	-0.100964	-0.171003	0.0451356	0.0120224	0.000528337	0.0135098	0.0177294	0.0189959	0.0196312	0.40461	0.249789	0.655157	0.251777	0.28242	0.463831	0.222283	0.999752	0.394975
ENSFDAG00000002417	-0.837709	0.0819887	0.0707145	0.387693	0.484086	-0.16449	-0.313085	0.320715	0.026761	0.00442269	0.0620311	0.0729619	0.0907134	0.0897069	0.139081	0.616237	0.287635	0.11956	0.0731091	0.58497	0.295875	0.999752	0.43211
ENSFDAG00000002419	0.497519	-0.105482	-0.0536274	0.248119	0.125662	0.0289571	-0.0593158	0.176893	0.0366113	0.00217439	0.0466228	0.0602694	0.0662777	0.0675779	0.236842	0.581443	0.250122	0.250511	0.608746	0.910444	0.81951	0.999752	0.628202
ENSFDAG00000002421	-1.15683	-0.0756283	0.150668	-0.533001	-0.181318	-0.342256	0.196758	0.579146	0.0546558	0.0079084	0.115443	0.137574	0.168162	0.166948	0.128483	0.746321	0.0902195	0.116715	0.624949	0.403934	0.630125	0.999752	0.561646
ENSFDAG00000002422	1.82546	0.141904	-0.180389	1.28818	0.811241	0.160547	0.21087	3.89272	0.0890974	0.0565603	0.64666	0.685313	0.973518	0.935719	0.35485	0.6345	0.448152	0.109174	0.327109	0.870742	0.827435	0.999752	0.630983
ENSFDAG00000002438	-0.144499	0.0820824	0.00076276	0.0730333	0.180999	0.194779	0.482712	0.16295	0.0144985	0.00223598	0.0320032	0.0378988	0.046706	0.0462813	0.720371	0.495433	0.98713	0.683091	0.352505	0.367445	0.0248447	0.999752	0.255044
ENSFDAG00000002441	1.02568	-0.263984	-0.118351	0.477186	0.188061	-0.0923121	-0.560427	0.674502	0.0394622	0.00950723	0.121682	0.13815	0.179822	0.175997	0.21171	0.183887	0.224826	0.171323	0.612879	0.827671	0.18159	0.999752	0.374193
ENSFDAG00000002448	-0.323725	-0.136197	0.0470398	-0.202172	-0.0439933	0.0709329	0.494246	0.105614	0.0195425	0.00132486	0.0264789	0.0338865	0.037767	0.0383492	0.319187	0.329923	0.196235	0.214078	0.811116	0.715113	0.0116075	0.999752	0.230215
ENSFDAG00000002450	1.25535	0.247395	-0.157249	0.170012	-0.332163	-0.240997	-0.884985	1.60761	0.269256	0.0205033	0.386691	0.490054	0.553153	0.559749	0.322131	0.633526	0.272122	0.784546	0.635149	0.745914	0.236858	0.999752	0.401641
ENSFDAG00000002451	0.476557	0.424847	-0.0643668	-0.317689	-0.306012	0.249076	-0.35503	0.651748	0.173601	0.00762906	0.195078	0.256009	0.274296	0.283471	0.554988	0.307888	0.461165	0.471969	0.545312	0.634375	0.504884	0.999752	0.514087
ENSFDAG00000002453	-0.136402	0.0388395	0.0026724	0.579086	-0.0483001	0.0681603	-0.698217	0.241095	0.0391609	0.00308966	0.0572893	0.0723766	0.0820258	0.0829175	0.781168	0.844401	0.961654	0.0155466	0.857518	0.81189	0.0153188	0.999752	0.241834
ENSFDAG00000002454	0.362016	-0.415275	-0.00147382	-0.136852	-0.155038	-0.906917	0.393108	0.949861	0.17915	0.0118756	0.24012	0.307848	0.342295	0.347807	0.710304	0.326527	0.989209	0.780032	0.779917	0.121111	0.505049	0.999752	0.514087
ENSFDAG00000002455	0.409656	-0.308949	-0.0404956	0.200581	0.502898	-0.228284	-0.0593907	0.213053	0.0567491	0.0024939	0.0637698	0.0836878	0.0896657	0.0926649	0.374801	0.194665	0.417421	0.427024	0.0821407	0.445844	0.845313	0.999752	0.635244
ENSFDAG00000002456	1.42219	-0.437555	-0.135724	0.081236	-0.269289	-0.282279	-0.522686	0.610112	0.126476	0.00749728	0.160923	0.208053	0.228752	0.233255	0.0686425	0.218566	0.117	0.839521	0.554937	0.555059	0.279143	0.999752	0.424518
ENSFDAG00000002458	0.0196089	-0.0291729	-0.00059733	-0.0371958	0.0723356	0.23606	0.152651	0.184139	0.029031	0.00237047	0.0432504	0.0544728	0.0619805	0.0625912	0.963552	0.864052	0.990211	0.858052	0.756615	0.343034	0.541755	0.999752	0.529846
ENSFDAG00000002459	-0.00259505	0.0735037	0.000982137	0.0285025	0.00854376	0.110445	0.029956	0.173108	0.00971186	0.00244504	0.0310217	0.0350834	0.0458958	0.0448699	0.995023	0.455752	0.984153	0.871442	0.963618	0.606177	0.887539	0.999752	0.647453
ENSFDAG00000002468	0.487418	-0.195619	-0.0303265	0.0206086	-0.040734	-0.232819	-1.00061	0.495763	0.102182	0.00609872	0.130415	0.168529	0.185418	0.189025	0.488779	0.540565	0.69777	0.954492	0.92096	0.588727	0.0213653	0.999752	0.253078
ENSFDAG00000002469	-0.50593	0.104723	0.0465361	-0.170483	0.171591	0.0825212	0.325296	0.137438	0.0182658	0.00181114	0.0303425	0.0375287	0.043713	0.0438913	0.172348	0.438423	0.27418	0.327721	0.37575	0.693069	0.120493	0.999752	0.335364
ENSFDAG00000002470	0.514834	-1.0265	0.0249924	-0.316121	-0.133644	-0.882209	0.00625456	1.18716	0.185024	0.0153088	0.277611	0.349227	0.397971	0.401737	0.636562	0.0170139	0.839922	0.548521	0.821085	0.161979	0.992127	0.999752	0.674449
ENSFDAG00000002473	1.1535	-0.497382	-0.0957801	-0.167341	-0.446508	-0.173105	-0.00816584	0.491516	0.0333283	0.00687228	0.091005	0.104798	0.133927	0.131617	0.0999049	0.00644026	0.247935	0.57909	0.167809	0.636202	0.982042	0.999752	0.671638
ENSFDAG00000002474	0.620008	-0.274238	-0.0620321	-0.545785	0.210801	-0.0482615	0.296505	0.869862	0.186749	0.0106181	0.233232	0.302402	0.331173	0.338166	0.506197	0.525691	0.547176	0.258422	0.70147	0.933165	0.610136	0.999752	0.554713
ENSFDAG00000002475	0.195465	0.244508	0.00202808	-0.108603	-0.650608	-0.304452	-1.75745	1.41807	0.205012	0.0184828	0.322462	0.40245	0.463332	0.466536	0.869619	0.589189	0.988098	0.848329	0.305096	0.654678	0.0100822	0.999752	0.228594
ENSFDAG00000002478	0.740077	-0.268997	-0.0704574	0.310027	0.160627	-0.248596	-0.100721	0.270745	0.033176	0.00360262	0.0581923	0.0713426	0.0840527	0.0841666	0.154934	0.139717	0.24045	0.198727	0.547591	0.391187	0.72846	0.999752	0.596609
ENSFDAG00000002480	-1.8151	0.174144	0.16897	0.203395	0.0479656	0.10942	-0.418483	0.358936	0.0378874	0.00485171	0.0737526	0.0889614	0.107044	0.10666	0.00244843	0.370966	0.015273	0.453889	0.872238	0.73805	0.20006	0.999752	0.385476
ENSFDAG00000002485	0.125033	0.200407	-0.0159514	-0.234249	-0.0173078	-0.0405794	-0.21059	0.0272265	0.00469919	0.000345568	0.00662937	0.00842675	0.00947479	0.00959761	0.448597	0.0034613	0.390844	0.00401457	0.85045	0.676759	0.0315873	0.999752	0.258813
ENSFDAG00000002489	0.139629	-0.247782	0.0117618	-0.109763	0.122912	-0.0761929	0.243026	0.137264	0.0167263	0.00182764	0.0294502	0.0360835	0.0425455	0.0425952	0.706267	0.055379	0.783221	0.522431	0.517599	0.711835	0.238983	0.999752	0.402707
ENSFDAG00000002494	1.20779	-0.195343	-0.129232	0.273344	-0.0819803	0.0808674	-0.360226	0.30257	0.0451881	0.00392584	0.0696272	0.0871983	0.0999443	0.100745	0.0281111	0.358128	0.0391558	0.300247	0.781302	0.798108	0.256412	0.999752	0.413272
ENSFDAG00000002496	-0.409037	0.203622	0.041496	-0.480351	-0.00804277	0.374848	0.0757097	0.207901	0.0456548	0.00252669	0.0563488	0.0731884	0.0799517	0.081718	0.369672	0.340602	0.409073	0.0430151	0.976283	0.184943	0.791128	0.999752	0.618219
ENSFDAG00000002497	0.0419766	-0.0502573	0.0146711	-0.398946	-0.364638	-0.175274	0.0499158	0.0638418	0.017005	0.000747303	0.0191088	0.0250773	0.0268686	0.0277673	0.868053	0.699942	0.59149	0.00390166	0.0213004	0.284939	0.764519	0.999752	0.610028
ENSFDAG00000002502	0.641505	-0.484419	-0.0505035	0.537374	-0.220496	-0.403053	-0.15215	0.349735	0.0627634	0.00441029	0.0865489	0.110437	0.123556	0.125326	0.278032	0.0531619	0.446968	0.0677586	0.507007	0.251527	0.667352	0.999752	0.576026
ENSFDAG00000002503	1.04905	-1.15016	-0.0425805	-0.682403	0.828058	-0.974647	0.0830917	0.61355	0.137874	0.00742324	0.168162	0.218788	0.238411	0.243925	0.180479	0.00195136	0.621156	0.0960944	0.0766755	0.0459218	0.866394	0.999752	0.641675
ENSFDAG00000002504	-0.255834	-0.278022	0.0672604	-0.212191	-0.478629	-0.223174	0.475858	0.615952	0.083165	0.00810079	0.136723	0.169392	0.196871	0.197779	0.744443	0.33501	0.454882	0.566062	0.244859	0.614977	0.284615	0.999752	0.426232
ENSFDAG00000002514	-0.148644	0.0678594	0.00551372	0.190116	0.209787	-0.083275	0.190085	0.0843146	0.0130642	0.0010882	0.0196726	0.0247325	0.0282068	0.0284681	0.608711	0.552712	0.867257	0.175271	0.182216	0.62001	0.259913	0.999752	0.415178
ENSFDAG00000002515	0.205838	-0.0902446	-0.00796164	-0.19173	-0.0972635	-0.0771422	-0.239574	0.133649	0.0148229	0.00179765	0.0278582	0.0337844	0.0403682	0.040289	0.573404	0.458553	0.851049	0.250671	0.59669	0.701017	0.232648	0.999752	0.399382
ENSFDAG00000002516	0.966297	-0.224436	-0.0857194	-0.106824	0.0605344	-0.426675	-0.173892	0.144938	0.00907414	0.00203569	0.0264478	0.0302205	0.0390112	0.0382521	0.0111436	0.0184691	0.0574503	0.511268	0.727676	0.0307537	0.373947	0.999752	0.464307
ENSFDAG00000002520	-0.275629	0.40415	0.00762873	-0.0232556	0.267854	0.3757	-0.523385	0.409427	0.0621446	0.00530007	0.0947875	0.118911	0.135993	0.137157	0.666642	0.104971	0.916544	0.939789	0.437299	0.308304	0.157589	0.999752	0.358381
ENSFDAG00000002521	0.00964915	0.135616	-0.00259318	-0.0713475	-0.0693424	0.0969092	0.232945	0.116736	0.024054	0.00143612	0.0307046	0.0396771	0.0436547	0.0445035	0.97747	0.381893	0.945445	0.683882	0.72775	0.642777	0.269497	0.999752	0.420355
ENSFDAG00000002526	-0.0168166	0.0308656	0.00411518	0.035081	-0.219867	0.133178	0.442238	0.075416	0.00950456	0.00100024	0.0163574	0.0201153	0.0236053	0.0236595	0.951171	0.751548	0.896473	0.78386	0.121086	0.386041	0.00403898	0.999752	0.204207
ENSFDAG00000002527	0.176635	-0.0769683	-0.0149939	-0.240251	0.0864214	-0.0350769	0.10379	0.151425	0.0301061	0.00187529	0.0391845	0.0504785	0.0557713	0.0567784	0.649887	0.657337	0.729161	0.224866	0.700495	0.881924	0.663143	0.999752	0.574688
ENSFDAG00000002528	0.194344	0.0614062	-0.0204593	-0.0495587	-0.0758123	0.201511	-0.0434225	0.0663186	0.0127795	0.000825988	0.0169236	0.0217402	0.0241097	0.0245169	0.450452	0.586997	0.476542	0.703237	0.607132	0.194362	0.781534	0.999752	0.61586
ENSFDAG00000002532	0.645933	-0.220005	-0.0578361	0.295195	-0.161007	-0.102369	-0.50895	0.186785	0.0431834	0.00224728	0.0519164	0.0676788	0.0735274	0.075328	0.135026	0.289735	0.222454	0.195129	0.535984	0.705785	0.0636861	0.999752	0.291812
ENSFDAG00000002538	-0.811982	0.222742	0.0712112	0.172943	0.266646	0.0687531	-0.227525	0.118396	0.0243794	0.00145673	0.0311314	0.0402263	0.0442624	0.0451218	0.0182839	0.153706	0.0620729	0.327001	0.183691	0.743823	0.284119	0.999752	0.426075
ENSFDAG00000002541	-1.25939	0.0715526	0.125291	0.139639	0.216869	-0.0559854	0.0239833	0.168336	0.0224592	0.00221724	0.0372132	0.0460458	0.0536047	0.0538303	0.00214404	0.633042	0.00779516	0.469148	0.312183	0.808928	0.917669	0.999752	0.655013
ENSFDAG00000002546	0.365143	0.175205	-0.0470076	-0.0331375	-0.154032	-0.0396852	0.0521695	0.0686428	0.0124091	0.000864537	0.0170395	0.0217579	0.0243202	0.0246749	0.163412	0.115762	0.10988	0.799605	0.296371	0.799129	0.739802	0.999752	0.601154
ENSFDAG00000002549	0.410221	-0.447676	-0.0229773	-0.253074	-0.083733	0.0496325	0.125282	0.145535	0.0244805	0.00185486	0.0350673	0.0444601	0.0501566	0.0507621	0.282234	0.00421994	0.59368	0.176555	0.691286	0.824612	0.578172	0.999752	0.543179
ENSFDAG00000002551	-0.575612	0.117173	0.0617304	-0.365796	0.0355508	0.0936411	0.120831	0.128632	0.0200332	0.00165892	0.0300714	0.037826	0.04311	0.0435169	0.108509	0.407755	0.129619	0.0349085	0.854962	0.651989	0.562437	0.999752	0.537023
ENSFDAG00000002554	-0.21491	0.213162	0.00207754	0.172904	0.166698	0.434737	0.0297362	0.119231	0.0317586	0.00139566	0.0356877	0.0468344	0.0501798	0.0518583	0.533686	0.231645	0.955652	0.360054	0.441135	0.0522929	0.896108	0.999752	0.649148
ENSFDAG00000002557	0.30544	-0.0989062	-0.0126478	-0.310276	-0.321514	-0.112851	-0.195608	0.0372684	0.00418254	0.00050067	0.00779561	0.00946616	0.011292	0.0112743	0.113609	0.126181	0.571905	0.000441129	0.000951275	0.28824	0.0654417	0.999752	0.294158
ENSFDAG00000002558	5.75331	-1.10886	-0.595004	-0.597804	0.0691251	1.95302	3.00344	10.9551	0.433537	0.156931	1.87874	2.06303	2.80284	2.71793	0.0821686	0.092167	0.133101	0.662735	0.961616	0.243387	0.0684861	0.999752	0.294908
ENSFDAG00000002559	-2.79734	0.0985377	0.321304	-0.463158	0.0654286	-0.204226	0.408764	0.421699	0.0782543	0.00528732	0.105857	0.135507	0.150972	0.153314	1.6497e-05	0.724652	9.92801e-06	0.154579	0.858927	0.599159	0.296506	0.999752	0.432559
ENSFDAG00000002567	-1.12206	0.503439	0.10967	-0.110396	-0.138172	0.014858	-0.760404	1.25036	0.23402	0.0156537	0.315031	0.403598	0.449182	0.45629	0.315638	0.298021	0.380728	0.844072	0.827825	0.982313	0.260291	0.999752	0.415296
ENSFDAG00000002568	0.796065	-0.099564	-0.0761277	-0.123059	0.0692179	-0.523176	0.0233412	0.14421	0.0234384	0.0018479	0.0342758	0.0433051	0.0490745	0.049609	0.0360567	0.515475	0.0765709	0.506248	0.739421	0.0181927	0.916538	0.999752	0.655013
ENSFDAG00000002569	0.0642027	-0.0119984	-0.00132607	-0.160562	-0.12347	-0.141737	0.0346027	0.0428567	0.00736132	0.00054438	0.0104146	0.0132319	0.0148868	0.0150773	0.756462	0.888783	0.954677	0.115641	0.283105	0.24537	0.778093	0.999752	0.614612
ENSFDAG00000002570	-0.405671	0.044027	0.00391615	0.193665	0.165313	0.308413	-0.177097	0.457657	0.0353684	0.00634578	0.0870125	0.101533	0.12755	0.125837	0.548734	0.814903	0.960791	0.511477	0.603896	0.387828	0.617611	0.999752	0.557626
ENSFDAG00000002571	0.160627	-0.00553993	0.0011878	-0.319502	-0.350888	0.125356	0.0527529	0.204083	0.0191199	0.00278853	0.0406042	0.0483501	0.0591606	0.0587195	0.722169	0.968042	0.982054	0.112835	0.110541	0.606286	0.827664	0.999752	0.630983
ENSFDAG00000002575	-0.766369	-0.333702	0.0792301	0.546965	1.09697	-0.494799	0.376915	0.821498	0.218816	0.00961608	0.245887	0.322687	0.345737	0.357302	0.397809	0.475612	0.419113	0.270009	0.0534723	0.400067	0.528328	0.999752	0.524246
ENSFDAG00000002577	0.951364	-0.608968	-0.0809246	-0.429836	-0.0180212	-0.0642002	0.713458	1.18134	0.231676	0.0146668	0.303824	0.390916	0.432609	0.440197	0.381409	0.205806	0.504	0.435499	0.977006	0.922243	0.282223	0.999752	0.426075
ENSFDAG00000002583	0.932843	-0.118038	-0.0791239	0.0188246	-0.381809	-0.183809	-0.514893	0.218547	0.0279598	0.00289342	0.0476365	0.0586759	0.0687109	0.0689032	0.045996	0.480241	0.141301	0.931268	0.114976	0.483165	0.0498161	0.999752	0.277854
ENSFDAG00000002587	-0.174198	-0.16564	0.0251307	0.496159	-0.47854	0.323211	-0.465828	0.706804	0.175547	0.00838467	0.203767	0.266737	0.287696	0.295879	0.835852	0.692594	0.78374	0.271707	0.354151	0.546783	0.391785	0.999752	0.472089
ENSFDAG00000002591	3.21931	-1.20941	-0.317315	-0.197165	0.0532381	0.42439	1.29071	1.86432	0.396121	0.0228023	0.497429	0.64442	0.70655	0.721165	0.0183847	0.0546584	0.0356093	0.779821	0.947124	0.613639	0.128541	0.999752	0.341675
ENSFDAG00000002593	-0.412474	-0.0194805	0.0406716	0.0590916	0.10539	-0.100588	0.128185	0.127826	0.0196571	0.0016516	0.0297394	0.037359	0.0426505	0.0430346	0.24863	0.889494	0.316932	0.731856	0.585576	0.626215	0.536632	0.999752	0.527929
ENSFDAG00000002596	-0.599281	0.344207	0.0239058	0.910283	-0.0533656	0.368292	-0.860191	0.890132	0.116267	0.0117552	0.195368	0.241184	0.281612	0.282596	0.525305	0.31275	0.82549	0.0394516	0.913469	0.487675	0.105636	0.999752	0.323246
ENSFDAG00000002599	-0.82628	-0.014902	0.0970505	-0.168061	-0.0128249	-0.0368006	-0.107067	0.237988	0.0371099	0.00306869	0.0556626	0.0700256	0.0797944	0.0805508	0.0903123	0.938339	0.079783	0.476257	0.961346	0.896347	0.705994	0.999752	0.590523
ENSFDAG00000002608	0.42911	-0.0401495	-0.0413429	-0.0569131	0.000582611	-0.131937	-0.23556	0.106986	0.0199727	0.00134	0.0269256	0.0344871	0.0383944	0.0389984	0.18955	0.776338	0.258729	0.728711	0.997497	0.500732	0.232937	0.999752	0.399382
ENSFDAG00000002610	3.41962	-0.993361	-0.3347	-0.910192	-1.61607	-1.08363	-1.30204	2.13882	0.151198	0.0298291	0.399219	0.461638	0.586786	0.577366	0.0193743	0.0106289	0.052633	0.149713	0.0173818	0.157178	0.0866106	0.999752	0.311251
ENSFDAG00000002611	-0.374057	0.0260043	0.0418263	-0.233472	0.136059	-0.0367017	0.184229	0.0743161	0.014774	0.000920372	0.01923	0.0247724	0.0273702	0.0278643	0.170021	0.830592	0.16799	0.0922547	0.387336	0.824436	0.269743	0.999752	0.420355
ENSFDAG00000002614	0.278495	0.129666	-0.0314864	0.169834	-0.000747793	-0.231362	-0.450931	0.248182	0.0313637	0.00329058	0.0538779	0.0662752	0.077744	0.0779296	0.576144	0.464066	0.583079	0.464366	0.997682	0.406668	0.106241	0.999752	0.323246
ENSFDAG00000002617	0.855955	-0.0518084	-0.0802823	-0.131705	0.0309531	-0.0611688	0.126328	0.210142	0.0289068	0.00275711	0.0469475	0.0582822	0.0675616	0.0679155	0.0618712	0.76058	0.126277	0.543289	0.897979	0.813952	0.627856	0.999752	0.560875
ENSFDAG00000002621	0.10799	0.0119621	-0.0126459	0.00863115	-0.0105107	-0.123641	0.0633784	0.0480062	0.0116715	0.000571877	0.0136876	0.0178978	0.0193448	0.0198704	0.622102	0.911835	0.596939	0.94119	0.937378	0.374027	0.65299	0.999752	0.571587
ENSFDAG00000002624	-0.167624	0.0438998	0.0150808	-0.142661	0.0663713	-0.0250415	0.0940142	0.0716567	0.00948649	0.000944738	0.015799	0.0195325	0.0227637	0.0228535	0.531188	0.652189	0.623677	0.256379	0.634859	0.868178	0.534011	0.999752	0.526751
ENSFDAG00000002626	-0.100476	0.191372	0.0170845	-0.062067	-0.16756	0.193007	-0.142195	0.229821	0.0240376	0.00310921	0.0471005	0.0567569	0.0683818	0.0681157	0.83399	0.217078	0.759306	0.774887	0.481847	0.460467	0.585871	0.999752	0.546737
ENSFDAG00000002629	0.0872135	0.271538	-0.0205662	0.0947446	-0.0763403	0.0440305	-0.324808	0.364595	0.0239182	0.00510751	0.0670898	0.0770077	0.0988272	0.0970312	0.885155	0.0791284	0.773521	0.714525	0.783241	0.888612	0.297075	0.999752	0.433045
ENSFDAG00000002631	0.3696	-0.287283	-0.0356456	-0.285641	-0.146426	0.0357578	0.0881231	0.560024	0.0577623	0.00758652	0.114326	0.137555	0.166056	0.165334	0.621385	0.231958	0.682359	0.398228	0.692989	0.930076	0.828423	0.999752	0.631139
ENSFDAG00000002634	0.30181	0.0977221	-0.0371426	-0.0358243	-0.322341	0.250438	0.321427	0.0709534	0.00902246	0.00094006	0.0154347	0.018999	0.0222673	0.0223251	0.257196	0.303575	0.225734	0.773074	0.0193579	0.0932914	0.0314586	0.999752	0.258813
ENSFDAG00000002639	0.64417	0.259825	-0.107356	0.705195	0.0557496	-0.160125	0.303271	0.981155	0.261342	0.0114849	0.293674	0.385401	0.412931	0.426742	0.515481	0.611279	0.31646	0.193157	0.928445	0.803219	0.642471	0.999752	0.566993
ENSFDAG00000002640	0.203524	-0.246303	0.000552413	0.0593328	0.0584274	-0.113307	-0.400318	0.216501	0.0348811	0.00277796	0.0512814	0.0647324	0.0734415	0.0742195	0.661816	0.18724	0.991638	0.793315	0.818368	0.67587	0.141719	0.999752	0.349488
ENSFDAG00000002642	0.316055	-0.0926269	-0.0286026	-0.103314	-0.0371252	-0.0400833	-0.0306584	0.045496	0.0121184	0.000532555	0.0136176	0.017871	0.0191475	0.019788	0.138406	0.400111	0.215184	0.375974	0.781234	0.772067	0.827471	0.999752	0.630983
ENSFDAG00000002643	-0.194097	0.257814	0.00912146	0.100326	0.0482342	0.301355	-0.610804	0.332017	0.0589727	0.00419413	0.0818094	0.104284	0.116825	0.118456	0.736229	0.288395	0.887992	0.725766	0.881266	0.37795	0.075949	0.999752	0.300477
ENSFDAG00000002647	0.254366	-0.132483	-0.033627	0.310261	0.043052	-0.232281	-0.242003	0.0492647	0.00543041	0.000663051	0.0102502	0.0124224	0.0148562	0.014824	0.251788	0.072208	0.191581	0.0021803	0.699297	0.0566858	0.0468519	0.999752	0.277021
ENSFDAG00000002649	-0.89802	0.681158	0.0957733	-0.735559	-0.0128036	0.259743	-0.416966	0.405395	0.0517538	0.00536855	0.0883014	0.108739	0.127375	0.127722	0.158418	0.00275191	0.191171	0.0133112	0.969028	0.466747	0.243323	0.999752	0.404975
ENSFDAG00000002650	-0.635506	0.0425016	0.0589288	-0.042732	0.353859	0.226205	0.45181	0.130866	0.0348578	0.00153186	0.0391703	0.0514048	0.0550767	0.0569189	0.0789634	0.819923	0.132162	0.829057	0.118587	0.335111	0.0582551	0.999752	0.286433
ENSFDAG00000002652	-0.0364724	-0.59648	0.0290513	-0.0579787	0.330053	0.0037064	0.503984	0.224832	0.0411763	0.00282541	0.0561206	0.0717502	0.0800693	0.0812741	0.938688	0.00328751	0.584693	0.806657	0.217884	0.989549	0.0770891	0.999752	0.301965
ENSFDAG00000002657	-0.964539	0.687033	0.0581264	0.0816084	0.36324	0.864638	0.160264	0.565158	0.115942	0.0069585	0.14835	0.191629	0.210947	0.215012	0.199483	0.043622	0.48592	0.8322	0.406663	0.0597608	0.729625	0.999752	0.59689
ENSFDAG00000002658	0.278373	0.209921	-0.0537656	-0.0963902	0.142572	0.0480775	-0.0954809	0.144081	0.0146387	0.00195458	0.0292909	0.035185	0.0425653	0.0423594	0.463332	0.0827368	0.223938	0.573295	0.447211	0.815737	0.642706	0.999752	0.566993
ENSFDAG00000002664	0.797035	-0.0758425	-0.0876424	0.0407028	-0.213602	0.206972	-0.360501	0.301321	0.0333949	0.00405322	0.0627944	0.0761467	0.0909952	0.0908146	0.146505	0.678125	0.168629	0.870968	0.43889	0.492636	0.231592	0.999752	0.39863
ENSFDAG00000002665	0.246816	0.0475933	-0.0259891	0.151954	-0.147922	-0.228286	-0.0142484	0.224392	0.0538248	0.0026802	0.0635381	0.083019	0.0898526	0.0922258	0.602341	0.837461	0.615664	0.546622	0.607682	0.446312	0.962578	0.999752	0.66668
ENSFDAG00000002666	2.89863	-1.3642	-0.201207	-0.516422	-1.02087	0.799319	0.988179	2.77042	0.246955	0.0380099	0.544356	0.644765	0.794395	0.787218	0.0815981	0.00604787	0.302055	0.483962	0.203597	0.369819	0.265386	0.999752	0.418182
ENSFDAG00000002683	0.849381	-0.345679	-0.095519	0.162455	0.0558226	-0.0747478	-0.196538	0.274322	0.0113526	0.00392361	0.0472589	0.0520756	0.0704367	0.0683669	0.104866	0.00117726	0.127279	0.454886	0.80675	0.778217	0.452254	0.999752	0.4959
ENSFDAG00000002685	-0.719254	0.268307	0.0561463	0.484986	0.147965	0.307804	-0.252834	0.0812321	0.014623	0.00102383	0.0201287	0.025692	0.0287328	0.0291476	0.0116164	0.0265021	0.0793077	0.000629931	0.355942	0.0693901	0.138625	0.999752	0.347511
ENSFDAG00000002692	0.13844	-0.110523	-0.0113907	-0.0782658	-0.147554	-0.241527	-0.0159427	0.113037	0.011897	0.00152834	0.0232072	0.027984	0.033686	0.0335618	0.680511	0.310919	0.770771	0.60742	0.377747	0.188189	0.930652	0.999752	0.65828
ENSFDAG00000002693	-1.37764	0.305366	0.160935	-0.377037	0.473544	0.462427	0.654547	0.588546	0.0640231	0.00793178	0.121983	0.147621	0.176872	0.176412	0.0725351	0.227491	0.0707577	0.280352	0.217762	0.27153	0.11914	0.999752	0.334619
ENSFDAG00000002699	2.76339	-0.528064	-0.239739	-0.566307	-1.09709	0.284738	1.21822	1.28705	0.1391	0.0173567	0.266253	0.321984	0.386141	0.385054	0.0148582	0.156814	0.0688015	0.272423	0.0531844	0.646796	0.0496235	0.999752	0.277854
ENSFDAG00000002701	-0.630415	0.000696769	0.0735971	0.0499983	0.0620592	0.229799	0.237898	0.211938	0.0122203	0.00298949	0.0381444	0.0432479	0.0563922	0.0551715	0.170883	0.994971	0.178285	0.797951	0.765385	0.333197	0.311144	0.999752	0.438719
ENSFDAG00000002708	3.20904	-1.11493	-0.290207	0.168625	-0.0662174	1.25262	1.33983	3.95862	0.381866	0.0539537	0.79361	0.947976	1.15521	1.14768	0.10677	0.071194	0.211523	0.849869	0.945778	0.243843	0.211058	0.999752	0.389554
ENSFDAG00000002715	0.0134165	-0.549488	0.0511813	-0.579999	-0.359615	0.150747	0.62423	0.241574	0.0238157	0.00328618	0.0487107	0.0583221	0.0708552	0.070443	0.978223	0.000369972	0.371952	0.00859036	0.136464	0.571176	0.0186759	0.999752	0.251858
ENSFDAG00000002716	-0.00488652	-0.208883	0.0147524	0.190518	-0.0749728	-0.213024	-0.314583	0.510144	0.0797338	0.00657568	0.119423	0.150276	0.171186	0.172822	0.994541	0.459454	0.855641	0.581425	0.846645	0.606647	0.449218	0.999752	0.494812
ENSFDAG00000002717	0.203343	-0.013433	-0.0272689	0.408099	0.131341	-0.214901	-0.511772	0.132333	0.0352484	0.00154903	0.0396092	0.0519808	0.0556938	0.0575567	0.576175	0.942961	0.488405	0.0403123	0.564564	0.362498	0.0329094	0.999752	0.26131
ENSFDAG00000002719	-1.37213	0.339187	0.126816	0.500538	0.202406	-0.36075	-0.848836	1.78946	0.169062	0.0244333	0.356801	0.425249	0.519721	0.515986	0.305019	0.409413	0.417192	0.402053	0.756267	0.61679	0.237327	0.999752	0.401885
ENSFDAG00000002721	0.411754	-0.122413	-0.0270373	-0.273504	-0.166814	-0.116838	-0.203892	0.110501	0.0269134	0.00131589	0.031535	0.0412389	0.0445652	0.0457806	0.215469	0.45556	0.456067	0.12352	0.411392	0.579948	0.340627	0.999752	0.450219
ENSFDAG00000002726	-0.00164026	-0.126589	0.00360416	-0.133355	-0.271629	-0.136536	-0.401457	0.49383	0.0487509	0.00671684	0.0996115	0.119284	0.14489	0.144053	0.998138	0.56642	0.964923	0.67264	0.431589	0.719821	0.290176	0.999752	0.429496
ENSFDAG00000002727	0.901126	0.0242173	-0.107195	0.154737	-0.00550439	0.527347	0.127772	0.192479	0.0155707	0.00266033	0.0369658	0.043339	0.0541107	0.0534588	0.0399787	0.846116	0.0376815	0.42093	0.978906	0.0233892	0.580524	0.999752	0.544101
ENSFDAG00000002730	-0.89461	-0.398752	0.170159	-0.679053	-0.713693	-0.0504652	-1.16227	1.00121	0.22833	0.0120784	0.276405	0.359992	0.391664	0.400994	0.371285	0.404004	0.121554	0.196493	0.234242	0.93573	0.0664412	0.999752	0.294209
ENSFDAG00000002735	-0.395949	0.0787465	0.040774	-0.125608	0.15069	-0.0458952	-0.000551916	0.0803936	0.0179823	0.000973549	0.0219846	0.0285936	0.0311736	0.031888	0.162576	0.557049	0.191286	0.396912	0.37285	0.79491	0.997534	0.999752	0.675072
ENSFDAG00000002738	-0.346828	0.0727223	0.0526298	-0.0628179	-0.179314	0.0465632	-0.0719687	0.184036	0.0259826	0.00240636	0.0414938	0.0516556	0.0596647	0.0600295	0.418821	0.651877	0.283325	0.75779	0.430136	0.848818	0.768958	0.999752	0.611258
ENSFDAG00000002739	0.0316951	0.158232	-0.0105756	0.329042	-0.20454	0.109256	-0.746548	0.236327	0.053153	0.00285879	0.0648004	0.0843141	0.0918675	0.0939961	0.948016	0.492507	0.843207	0.196151	0.481176	0.718498	0.0148909	0.999752	0.238505
ENSFDAG00000002743	0.262712	0.109284	-0.0293957	0.35239	-0.139838	-0.0775662	-1.06655	0.437666	0.0832354	0.00546388	0.111042	0.142473	0.158254	0.16085	0.691288	0.704841	0.690866	0.290284	0.711027	0.845407	0.00782972	0.999752	0.228594
ENSFDAG00000002748	-0.311282	0.171019	-0.0142168	0.637013	0.941692	-0.101531	-0.334791	0.536724	0.0912609	0.00682882	0.129891	0.164861	0.185724	0.188035	0.670916	0.571318	0.863406	0.0771451	0.0203809	0.813748	0.440076	0.999752	0.491478
ENSFDAG00000002751	-0.369839	-0.0838144	0.0482363	0.234849	0.0101538	-0.312986	-0.160862	0.143154	0.0295974	0.00176	0.037712	0.0487461	0.0536121	0.0546616	0.328328	0.626129	0.250232	0.226532	0.963319	0.176458	0.491428	0.999752	0.509213
ENSFDAG00000002754	-0.198176	0.439436	-0.0089953	-0.174664	-0.076403	0.284342	-0.0786079	0.301643	0.020244	0.00422007	0.0557411	0.0641244	0.0820557	0.0806168	0.718225	0.00201169	0.889869	0.459421	0.762868	0.320892	0.781891	0.999752	0.61586
ENSFDAG00000002757	-1.83491	-0.0640543	0.234288	-0.836644	-0.141827	0.206745	-0.0219563	0.437534	0.0439925	0.00594124	0.0886947	0.106422	0.128934	0.128267	0.00553684	0.760067	0.00236924	0.00496553	0.663742	0.56477	0.951116	0.999752	0.664053
ENSFDAG00000002758	2.93324	-2.78236	-0.143731	0.065222	-1.25934	0.423153	2.48537	9.13218	1.14447	0.1212	1.97711	2.42984	2.85367	2.85968	0.331725	0.00930021	0.679713	0.963003	0.419152	0.802206	0.14164	0.999752	0.349488
ENSFDAG00000002765	0.615281	-0.438074	-0.0175877	-0.934109	-0.113074	0.00271311	0.16178	0.784929	0.0706972	0.0107601	0.154625	0.183348	0.225574	0.223609	0.487382	0.0994391	0.865364	0.0175244	0.791724	0.995442	0.73226	0.999752	0.597986
ENSFDAG00000002767	0.300764	0.298589	-0.0225972	-0.404004	-0.437508	-0.327679	-0.11278	0.231126	0.0402641	0.00292906	0.0564926	0.0718753	0.0807179	0.0817904	0.531573	0.13674	0.67629	0.0891742	0.102699	0.248764	0.693323	0.999752	0.585448
ENSFDAG00000002768	1.23232	-0.168596	-0.138674	0.205675	-0.282165	-0.194702	-0.585253	0.432258	0.0300398	0.00603483	0.0804126	0.0928268	0.118253	0.116297	0.0608812	0.330679	0.0742451	0.468265	0.354385	0.571262	0.0861312	0.999752	0.310185
ENSFDAG00000002771	-0.294056	-0.0764185	0.030419	0.114086	0.132105	0.119207	0.139282	0.0428237	0.0114066	0.000501274	0.0128178	0.0168213	0.0180228	0.0186257	0.155322	0.474289	0.174257	0.313603	0.308408	0.374568	0.307461	0.999752	0.436851
ENSFDAG00000002778	1.19378	-0.803467	-0.121275	0.533314	0.228522	0.102506	0.51442	0.761746	0.139732	0.00957002	0.19027	0.243298	0.271453	0.275553	0.171378	0.0316014	0.21509	0.221467	0.643152	0.844028	0.327099	0.999752	0.444112
ENSFDAG00000002780	-0.387833	0.63569	0.0511728	0.117365	-0.416271	0.063387	-1.96658	1.06272	0.116988	0.014305	0.221029	0.26783	0.320363	0.319655	0.706758	0.0630912	0.668758	0.802866	0.421194	0.910831	0.000504553	0.999752	0.199774
ENSFDAG00000002781	0.232091	-0.0954112	-0.0153656	-0.477733	0.10521	0.192419	-0.0251751	0.238986	0.0636567	0.00279746	0.071532	0.0938744	0.10058	0.103944	0.634959	0.705311	0.771423	0.0740635	0.731309	0.544033	0.93776	0.999752	0.660226
ENSFDAG00000002784	-0.0233202	-0.235808	0.0309382	-0.0626708	-0.343954	-0.337577	-0.416135	0.11966	0.0318729	0.00140069	0.0358161	0.047003	0.0503605	0.0520449	0.946251	0.186558	0.408433	0.740531	0.112628	0.13251	0.0681391	0.999752	0.294908
ENSFDAG00000002787	0.80861	-0.110828	-0.0917539	0.253385	-0.121696	-0.0409368	-0.293019	0.281919	0.0583615	0.00346523	0.0743117	0.0960647	0.105639	0.107712	0.127779	0.646405	0.119071	0.352627	0.694586	0.89977	0.371953	0.999752	0.463373
ENSFDAG00000002788	0.478159	-0.0840481	-0.0354897	-0.00280461	-0.485012	-0.259993	-0.457628	0.79282	0.188931	0.00948191	0.223744	0.292232	0.316497	0.324743	0.591258	0.846674	0.715512	0.995269	0.369613	0.643979	0.421946	0.999752	0.484055
ENSFDAG00000002789	1.22273	-0.100802	-0.228899	-0.551175	-0.186115	-0.215093	-0.0780137	2.48999	0.080946	0.0358828	0.420071	0.454751	0.629093	0.607766	0.438414	0.723115	0.226905	0.395097	0.782555	0.786247	0.920289	0.999752	0.655742
ENSFDAG00000002791	0.0592223	-0.0592209	0.00231078	0.114099	-0.250907	-0.138998	-0.338525	0.144241	0.0281871	0.00179197	0.0370378	0.0476396	0.052743	0.0536611	0.876085	0.724286	0.956467	0.553269	0.250327	0.545021	0.143913	0.999752	0.3504
ENSFDAG00000002793	-0.107304	-0.0646589	0.0225158	-0.20534	0.0858237	-0.238555	-0.116739	0.224861	0.0598943	0.00263211	0.0673041	0.088326	0.0946352	0.0978006	0.820978	0.791624	0.660757	0.428651	0.772752	0.438066	0.708933	0.999752	0.591107
ENSFDAG00000002796	-0.476645	0.0784404	0.059881	-0.149536	-0.0572163	0.231527	0.0453805	0.0826031	0.0113797	0.00108356	0.0184639	0.0229254	0.0265699	0.0267104	0.0972306	0.462147	0.0688927	0.271119	0.705515	0.155496	0.781266	0.999752	0.61586
ENSFDAG00000002801	-0.565872	0.0960229	0.0314518	1.13831	-0.0465965	0.105416	-0.236784	0.517214	0.0814134	0.0066598	0.121408	0.152886	0.173994	0.175699	0.431379	0.736469	0.699939	0.00108735	0.90514	0.800485	0.572145	0.999752	0.541166
ENSFDAG00000002803	0.276642	-0.983754	-0.00969852	0.335486	0.552601	0.259263	1.14999	0.702108	0.05238	0.00975834	0.132494	0.154046	0.194429	0.191614	0.741284	1.72059e-05	0.92179	0.3567	0.159147	0.556548	0.008611	0.999752	0.228594
ENSFDAG00000002804	-2.62138	0.301378	0.255222	0.983584	0.486623	0.533148	0.811005	0.536163	0.0898707	0.00683731	0.129008	0.163504	0.184538	0.186744	0.000343614	0.314745	0.00202481	0.00617309	0.228803	0.214571	0.0605559	0.999752	0.288071
ENSFDAG00000002807	-0.0478022	0.290419	-0.017887	0.52616	-0.311079	0.508886	-0.651738	0.58226	0.104493	0.00734251	0.144092	0.183862	0.205703	0.20865	0.950049	0.368959	0.834648	0.165713	0.468158	0.261855	0.153637	0.999752	0.356192
ENSFDAG00000002808	0.348939	0.128718	-0.0447727	0.31486	-0.00778736	-0.0123077	-0.558939	0.320013	0.0561557	0.00405067	0.0784544	0.0998888	0.112074	0.113591	0.537347	0.587007	0.481759	0.260966	0.980343	0.970673	0.0972346	0.999752	0.318803
ENSFDAG00000002810	1.69149	-0.379862	-0.162354	-0.310692	0.0938342	-0.435787	-0.335057	0.168022	0.0447547	0.00196679	0.0502915	0.0659996	0.0707141	0.0730794	3.68275e-05	0.07256	0.000251358	0.165922	0.714925	0.101259	0.215187	0.999752	0.390901
ENSFDAG00000002823	0.51794	-0.325035	-0.0463064	0.296543	-0.176915	-0.0474741	-0.719257	0.316609	0.0391828	0.0042081	0.0682671	0.0837847	0.0985734	0.0987396	0.357318	0.100583	0.475329	0.256391	0.541068	0.879811	0.0220817	0.999752	0.253106
ENSFDAG00000002827	0.513342	-0.0751616	-0.0433187	-0.215602	-0.0331501	-0.0166556	0.254303	0.136738	0.0161621	0.00182684	0.0290575	0.0354842	0.0420193	0.0420257	0.165067	0.554375	0.31082	0.205941	0.860308	0.935241	0.214794	0.999752	0.390759
ENSFDAG00000002829	0.0734623	-0.0127945	-0.00542945	-0.0930819	-0.0389675	-0.13428	0.0944943	0.0292073	0.00515845	0.000369305	0.0071797	0.00914705	0.0102544	0.0103956	0.667304	0.858612	0.777538	0.271973	0.683686	0.184826	0.354035	0.999752	0.454816
ENSFDAG00000002831	0.424331	-0.0618292	-0.0325871	-0.202088	-0.077164	-0.279101	-0.264885	0.112544	0.029651	0.00132007	0.0334845	0.0439312	0.0471172	0.0486515	0.205921	0.719546	0.369768	0.269429	0.712759	0.198515	0.229786	0.999752	0.397505
ENSFDAG00000002835	-0.539651	0.152755	0.0473928	0.359785	0.155244	0.00475581	-0.32094	0.103014	0.027439	0.00120583	0.0308336	0.0404642	0.0433546	0.0448047	0.09269	0.356439	0.172316	0.0404673	0.440259	0.981777	0.129464	0.999752	0.342006
ENSFDAG00000002837	0.122378	-0.116041	-0.0156793	0.216534	0.208715	0.020846	-0.116559	0.189236	0.0504052	0.00221511	0.0566412	0.0743325	0.0796422	0.0823061	0.778464	0.605252	0.739027	0.362913	0.443954	0.941116	0.684533	0.999752	0.581927
ENSFDAG00000002842	0.249052	-0.175949	-0.0171187	-0.0516125	0.181471	-0.207907	-0.0777227	0.04878	0.0128221	0.000572402	0.014495	0.019016	0.0203994	0.02106	0.259473	0.120222	0.474289	0.668147	0.188182	0.145486	0.592254	0.999752	0.549256
ENSFDAG00000002848	1.28465	-0.164271	-0.110504	-0.322674	-0.379293	-0.199217	-0.194916	0.146451	0.0192116	0.00193302	0.0321898	0.0397574	0.0463935	0.0465624	0.000788228	0.235952	0.0119577	0.0721011	0.0571393	0.355014	0.36637	0.999752	0.461737
ENSFDAG00000002854	1.56864	-0.890702	-0.106779	-0.160017	-0.817372	-0.321045	-0.502805	0.196672	0.0365553	0.00246521	0.0494039	0.0632517	0.070456	0.0715534	0.000404488	3.18344e-06	0.0315076	0.471572	0.00115404	0.22647	0.0601511	0.999752	0.287632
ENSFDAG00000002857	-0.453393	-0.117821	0.0456814	0.0296773	0.233457	0.275925	0.0146696	0.238447	0.0225766	0.00325515	0.0475708	0.0567099	0.0692874	0.0687942	0.353152	0.43296	0.423323	0.891768	0.326917	0.294525	0.955398	0.999752	0.664792
ENSFDAG00000002858	-0.0872095	-0.289878	0.0424554	-0.450682	-0.053837	-0.0477153	0.0951763	0.115179	0.0125576	0.0015519	0.0238878	0.0289154	0.0346341	0.0345466	0.797204	0.00968722	0.281164	0.00354589	0.751544	0.797648	0.608605	0.999752	0.554073
ENSFDAG00000002862	0.189226	0.115568	-0.0452755	0.042741	0.0880847	0.116961	-0.323956	0.240823	0.0199461	0.0033228	0.046499	0.0546503	0.0680154	0.0672451	0.699796	0.413192	0.432197	0.842882	0.706326	0.65381	0.211567	0.999752	0.389554
ENSFDAG00000002867	-0.326246	0.145806	0.0344396	-0.343552	0.0214824	0.12855	0.148156	0.0708921	0.018883	0.000829831	0.0212191	0.0278467	0.0298358	0.0308338	0.220458	0.288663	0.231877	0.0183508	0.897567	0.456743	0.398816	0.999752	0.475018
ENSFDAG00000002870	0.670088	-0.517125	-0.0729517	0.469812	0.227688	0.416707	0.71061	0.406771	0.07054	0.00515889	0.0992374	0.126202	0.141812	0.143673	0.293421	0.0515283	0.309781	0.135864	0.521573	0.268484	0.0608269	0.999752	0.28852
ENSFDAG00000002872	-0.0906789	-0.765658	-0.0159054	1.72567	1.13758	-0.0244608	-0.234031	2.11055	0.218618	0.0285797	0.43137	0.51926	0.626471	0.623835	0.95023	0.101517	0.925042	0.00860294	0.114412	0.975346	0.766998	0.999752	0.610447
ENSFDAG00000002881	-0.15277	0.020428	0.0270846	-0.151737	-0.0756488	-0.0800295	-0.199808	0.0632913	0.00454095	0.000881878	0.0118485	0.0137215	0.0174077	0.0171357	0.543686	0.761778	0.361743	0.163321	0.518405	0.544137	0.126915	0.999752	0.340778
ENSFDAG00000002882	0.359915	0.0637481	-0.0332573	-0.166838	-0.117842	0.13066	0.163006	0.142484	0.0186072	0.00188171	0.0312706	0.0386032	0.0450751	0.0452324	0.340342	0.640261	0.443275	0.345441	0.548657	0.538274	0.443415	0.999752	0.492819
ENSFDAG00000002885	0.859902	-0.143654	-0.117127	1.52868	0.60231	0.62533	-0.375062	1.94397	0.222999	0.0260557	0.40932	0.498224	0.592482	0.591982	0.537404	0.760972	0.468075	0.0168769	0.393487	0.41656	0.625925	0.999752	0.560086
ENSFDAG00000002888	-0.99792	0.735379	0.0622461	0.323387	0.463242	-0.13204	-0.172823	0.513215	0.127138	0.00609123	0.147758	0.193395	0.208644	0.214546	0.163625	0.0391698	0.42513	0.400185	0.292167	0.772528	0.709064	0.999752	0.591107
ENSFDAG00000002889	0.874747	-0.435688	-0.0813064	-0.225161	-0.218362	-0.0701297	-0.262452	0.496909	0.0755643	0.0064308	0.115122	0.144448	0.165157	0.166582	0.214635	0.112976	0.310634	0.506938	0.565602	0.862993	0.5202	0.999752	0.520273
ENSFDAG00000002894	-0.33542	0.0661092	0.0265997	0.127629	0.106689	0.020349	0.116772	0.0637492	0.0150796	0.000763538	0.0179235	0.0233994	0.0253615	0.0260122	0.184023	0.590333	0.33573	0.340428	0.485516	0.898325	0.469053	0.999752	0.502314
ENSFDAG00000002897	0.364483	-0.0239594	-0.0618418	0.347125	0.167682	-0.00350741	-0.3705	0.381155	0.0435341	0.00511111	0.0801501	0.0975124	0.116032	0.115917	0.554941	0.908579	0.387029	0.220153	0.591282	0.991785	0.276501	0.999752	0.423072
ENSFDAG00000002899	-0.633137	0.372023	0.0496718	0.0612122	-0.243827	0.492313	0.0678339	0.205918	0.0548486	0.00241038	0.0616343	0.0808852	0.0866629	0.0895616	0.162941	0.112174	0.311664	0.805247	0.391263	0.094457	0.820684	0.999752	0.62881
ENSFDAG00000002901	-0.239783	0.125545	0.0293187	-0.203772	0.188636	0.0899023	0.104158	0.330701	0.0306901	0.00452223	0.065637	0.0780789	0.0956627	0.0949205	0.676704	0.473596	0.66285	0.426398	0.499624	0.771304	0.735307	0.999752	0.599448
ENSFDAG00000002908	1.27458	-0.190073	-0.112357	-0.291791	-0.141302	0.074928	0.0937097	0.215484	0.0225158	0.00291552	0.0441499	0.0531956	0.0641	0.0638485	0.00603738	0.205259	0.0374464	0.164925	0.540108	0.76727	0.710742	0.999752	0.591693
ENSFDAG00000002914	0.497823	-0.308733	-0.0323012	-0.0935932	-0.0105902	-0.10619	-0.510659	0.226219	0.060256	0.00264801	0.0677106	0.0888594	0.0952068	0.0983913	0.295251	0.208494	0.530194	0.719087	0.97166	0.730733	0.103527	0.999752	0.321054
ENSFDAG00000002916	0.091268	0.0456429	-0.0109016	-0.00318293	-0.0400751	-0.137238	-0.097833	0.125464	0.0334189	0.00146863	0.0375534	0.0492829	0.0528032	0.0545694	0.796664	0.802838	0.776052	0.986895	0.856744	0.55035	0.675359	0.999752	0.579046
ENSFDAG00000002917	0.439462	-0.117999	-0.0539883	0.0965948	-0.229479	-0.128672	-0.523106	0.950717	0.0929987	0.0129418	0.191302	0.228856	0.27834	0.276651	0.652199	0.698802	0.635092	0.82521	0.631447	0.807315	0.319959	0.999752	0.441971
ENSFDAG00000002921	-0.460633	-0.00461071	0.0430968	0.148275	0.234807	0.0929599	0.191657	0.0807943	0.0167337	0.000992997	0.0213015	0.0275381	0.0302809	0.0308759	0.105113	0.971567	0.171426	0.309664	0.157081	0.593197	0.275395	0.999752	0.422876
ENSFDAG00000002924	0.36932	-0.0158927	-0.0446377	0.263481	-0.217824	0.207816	-0.288112	0.203334	0.0221281	0.0027402	0.0421483	0.0510091	0.0611132	0.0609551	0.412771	0.914917	0.39381	0.199355	0.334818	0.400547	0.243226	0.999752	0.404969
ENSFDAG00000002926	-0.287308	0.0712399	0.0219967	-0.0735331	0.149823	0.0558453	0.282447	0.0638144	0.01025	0.000819193	0.0150973	0.0190513	0.0216233	0.0218501	0.255398	0.481645	0.442169	0.549535	0.277715	0.704113	0.056033	0.999752	0.284807
ENSFDAG00000002928	0.0407828	-0.0124737	-0.00411515	-0.108766	0.0448568	-0.0301061	0.250178	0.0358108	0.00669523	0.000448415	0.00901842	0.0115527	0.0128592	0.0130622	0.829369	0.878836	0.845915	0.252077	0.676431	0.790632	0.0285982	0.999752	0.258604
ENSFDAG00000002930	-1.32244	-0.741103	0.202222	-0.304133	-0.84465	0.346387	0.98403	0.44991	0.0682855	0.00582417	0.104158	0.130665	0.149436	0.150716	0.0486589	0.00456751	0.00805415	0.346008	0.0194562	0.370224	0.0112539	0.999752	0.23014
ENSFDAG00000002932	-0.457144	0.219961	0.0392426	-0.310443	-0.0106167	0.0811675	0.738711	0.229923	0.0496424	0.00280351	0.0618143	0.0801825	0.0877559	0.0896302	0.340402	0.32353	0.458602	0.211797	0.970092	0.784088	0.0136081	0.999752	0.234484
ENSFDAG00000002933	0.0361902	-0.0866544	0.0104499	-0.241667	0.0106535	-0.0945679	-0.176637	0.0452422	0.00709797	0.000582839	0.0106064	0.0133518	0.0152019	0.0153492	0.864896	0.303693	0.665124	0.0189475	0.926541	0.443083	0.153945	0.999752	0.356192
ENSFDAG00000002934	-0.119466	0.0943953	-0.00518282	0.0996437	-0.0544426	0.227139	0.088232	0.14741	0.0295982	0.00182226	0.038316	0.0494025	0.0545191	0.055524	0.755679	0.583226	0.903365	0.610717	0.806501	0.33066	0.708075	0.999752	0.591107
ENSFDAG00000002942	0.458395	0.0390466	-0.0477947	-0.0185385	-0.198559	0.00448251	-0.328274	0.107083	0.0176416	0.00136928	0.0255882	0.0323737	0.0366213	0.0370372	0.161271	0.768775	0.196489	0.907738	0.269787	0.981312	0.0880535	0.999752	0.311536
ENSFDAG00000002952	0.018975	0.0642921	-0.00724902	-0.119027	0.112572	-0.0057053	0.228621	0.117684	0.0140133	0.00157099	0.0250662	0.0306349	0.036239	0.0362534	0.95589	0.587055	0.854884	0.452173	0.520119	0.976091	0.22986	0.999752	0.397505
ENSFDAG00000002954	0.423743	0.140836	-0.0703854	0.213964	0.0851339	0.130475	-0.417454	0.680061	0.09298	0.00892961	0.151609	0.18809	0.218221	0.219319	0.607363	0.644176	0.456365	0.582654	0.844375	0.780011	0.372717	0.999752	0.463783
ENSFDAG00000002959	0.737181	-0.748569	-0.0272187	-0.87634	0.108474	0.0510855	-0.566935	0.69158	0.159956	0.00832	0.192263	0.250644	0.272291	0.278965	0.375377	0.0612508	0.765394	0.0456523	0.828467	0.922012	0.283095	0.999752	0.426075
ENSFDAG00000002961	-0.13501	-0.00773009	0.0261346	-0.28618	0.0406487	-0.160761	-0.202303	0.0883327	0.0235285	0.00103398	0.0264393	0.0346974	0.0371759	0.0384193	0.649641	0.959808	0.416359	0.0784072	0.827256	0.404408	0.302018	0.999752	0.434716
ENSFDAG00000002964	-0.28298	-0.191632	0.0256463	0.305608	0.0610836	-0.61284	-0.251445	0.329073	0.0302418	0.00450364	0.0651521	0.077421	0.0949858	0.0942193	0.621802	0.27048	0.702344	0.231192	0.826237	0.0467603	0.412691	0.999752	0.481432
ENSFDAG00000002972	-0.106378	0.176363	-0.00204387	0.00206452	0.0533848	0.197641	0.517921	0.0485701	0.00772798	0.000624395	0.0114486	0.0144329	0.016402	0.0165688	0.629316	0.044835	0.93481	0.984606	0.656778	0.122777	5.73058e-05	0.999752	0.174483
ENSFDAG00000002974	0.493871	0.0789273	-0.0697802	0.539784	-0.344781	-0.107015	-0.831416	0.656969	0.0931679	0.00858509	0.148361	0.184782	0.213301	0.214637	0.542316	0.79596	0.451382	0.161095	0.422511	0.816762	0.0727186	0.999752	0.298934
ENSFDAG00000002979	-0.457061	0.0680272	0.0478188	-0.140035	-0.00119784	0.132913	0.288259	0.0298021	0.00793814	0.00034885	0.00892022	0.0117064	0.0125426	0.0129621	0.00810673	0.445151	0.0104602	0.138159	0.991167	0.235311	0.0113449	0.999752	0.23014
ENSFDAG00000002982	-0.00541123	0.244926	-0.0112719	-0.0756506	-0.0145135	0.228858	-0.0784535	0.13168	0.020087	0.00170339	0.0305428	0.0383359	0.0438135	0.0441961	0.988102	0.0839642	0.784767	0.665109	0.94091	0.274237	0.709013	0.999752	0.591107
ENSFDAG00000002984	-0.559512	0.386907	0.0482911	-0.21076	0.231031	-0.0143322	0.191902	0.207905	0.026577	0.00275279	0.0453048	0.055799	0.0653494	0.0655305	0.219788	0.0176299	0.35736	0.322084	0.328053	0.95529	0.453467	0.999752	0.496302
ENSFDAG00000002986	-0.201515	0.00415636	0.0202376	-0.0568748	0.0914825	0.0195018	0.189716	0.0522303	0.0122749	0.000626375	0.0146369	0.019101	0.0207164	0.021241	0.377912	0.970074	0.418737	0.63828	0.508018	0.892222	0.193013	0.999752	0.381
ENSFDAG00000002990	-0.683694	0.224685	0.0712383	-0.316574	0.0787863	0.177877	0.143914	0.20136	0.0342052	0.00256234	0.0487118	0.0618203	0.0696521	0.0705166	0.127605	0.224417	0.15933	0.151469	0.75134	0.500318	0.587855	0.999752	0.54733
ENSFDAG00000002994	0.20547	-0.465868	-0.0244591	0.00939565	0.875334	0.382947	0.843736	0.999463	0.194005	0.0124318	0.255874	0.328916	0.364445	0.370698	0.837162	0.290199	0.826364	0.985181	0.126943	0.525858	0.165812	0.999752	0.364717
ENSFDAG00000003003	-0.832926	-0.213945	0.0846568	0.265907	0.74977	-0.00361538	0.474688	0.6524	0.165759	0.00770517	0.190349	0.249425	0.268432	0.276463	0.30244	0.599243	0.33483	0.542211	0.133286	0.994432	0.366633	0.999752	0.461737
ENSFDAG00000003004	-0.25653	-0.000538562	0.0385775	-0.148179	0.0395593	-0.275095	-0.166174	0.11266	0.0300084	0.00131875	0.0337209	0.0442533	0.0474144	0.0490003	0.444701	0.997519	0.288093	0.419706	0.850837	0.20646	0.452836	0.999752	0.496065
ENSFDAG00000003009	-1.63695	0.75963	0.133093	-0.168192	0.853997	-0.0316101	-1.02325	0.544546	0.0524973	0.00742224	0.109151	0.130374	0.158887	0.157849	0.0265349	0.000915174	0.122383	0.610693	0.0180221	0.936793	0.0100097	0.999752	0.228594
ENSFDAG00000003013	-0.512703	0.0202107	0.0524454	-0.0372683	-0.157713	0.0495462	0.338919	0.350496	0.0117214	0.00504694	0.059249	0.0642654	0.0886853	0.0857214	0.386483	0.851914	0.460374	0.878313	0.533859	0.867863	0.247035	0.999752	0.407751
ENSFDAG00000003014	-0.258687	0.529595	-0.0237832	0.433817	-0.720701	0.498595	-0.411472	0.621109	0.0495223	0.00859348	0.118899	0.139188	0.174123	0.171949	0.74273	0.0173212	0.79752	0.208352	0.0533889	0.232139	0.321053	0.999752	0.441987
ENSFDAG00000003022	-0.0875606	-0.0639606	0.0134433	0.312945	-0.233619	-0.215943	-0.516077	0.423106	0.0625506	0.00549765	0.0969998	0.121348	0.139279	0.140347	0.892919	0.798152	0.856125	0.31499	0.502448	0.562844	0.168338	0.999752	0.365803
ENSFDAG00000003028	-1.23527	-0.100094	0.148067	-0.701562	0.370689	0.126163	0.91523	0.622899	0.163373	0.00731233	0.184873	0.242521	0.260218	0.2686	0.117551	0.804415	0.0833573	0.102752	0.451616	0.804659	0.0774049	0.999752	0.301986
ENSFDAG00000003030	-0.615691	0.570012	0.0350467	-0.298781	0.280777	0.0754949	-0.132364	0.214385	0.0364341	0.00272788	0.0518722	0.0658342	0.0741701	0.0750918	0.183606	0.00282398	0.502209	0.18957	0.273824	0.781622	0.629076	0.999752	0.561159
ENSFDAG00000003031	0.590917	-0.125988	-0.0550735	0.0446198	0.283009	-0.722812	-0.550367	0.523876	0.125228	0.00626159	0.148077	0.193439	0.209435	0.214927	0.414262	0.721823	0.486438	0.90769	0.51992	0.114237	0.235167	0.999752	0.400674
ENSFDAG00000003033	1.12232	-0.94346	-0.0960923	0.574034	-0.133519	-0.26268	-0.202738	0.742916	0.0781332	0.0100455	0.152494	0.183867	0.221354	0.220533	0.192879	0.000737489	0.337687	0.141567	0.755512	0.576626	0.665947	0.999752	0.575992
ENSFDAG00000003034	1.47279	-0.75563	-0.131148	2.03556	1.89423	0.348361	0.395513	5.37018	0.266864	0.0762684	0.945613	1.0579	1.40338	1.36783	0.525073	0.143541	0.634869	0.0363241	0.065525	0.768709	0.73523	0.999752	0.599448
ENSFDAG00000003035	-0.20265	0.107223	0.0145478	-0.0081344	-0.130522	0.218206	0.471952	0.0546429	0.0132553	0.000651225	0.0155619	0.0203461	0.021996	0.0225908	0.385986	0.351696	0.568627	0.948009	0.360169	0.141215	0.00168939	0.999752	0.204207
ENSFDAG00000003036	0.511978	-0.34689	-0.0593725	0.393945	0.0483168	-0.102005	-0.21631	0.46467	0.0814996	0.00588219	0.113895	0.145005	0.162704	0.164904	0.452612	0.224325	0.438852	0.243088	0.899032	0.800357	0.594259	0.999752	0.549725
ENSFDAG00000003040	0.252986	-0.0269575	-0.0194997	0.124812	-0.170878	-0.149663	-0.774379	0.45948	0.0866823	0.00574441	0.116167	0.148936	0.165596	0.168265	0.708986	0.927046	0.796963	0.714218	0.657927	0.713037	0.0590521	0.999752	0.286531
ENSFDAG00000003042	-2.41095	0.325769	0.27158	-0.0856536	-0.324828	0.0506824	-0.621839	1.24711	0.132059	0.0168518	0.256483	0.309481	0.372219	0.370921	0.0308565	0.370014	0.0364331	0.865696	0.55929	0.933794	0.307242	0.999752	0.436824
ENSFDAG00000003043	-0.312413	0.0743657	0.0405221	0.152512	0.0268004	-0.479789	-0.449938	0.171815	0.0457649	0.00201119	0.0514268	0.0674895	0.0723104	0.074729	0.451029	0.728125	0.366219	0.501248	0.917834	0.0743871	0.0997804	0.999752	0.320377
ENSFDAG00000003044	0.729752	-0.415611	-0.0683995	-0.0208167	-0.138517	-0.309534	-0.420489	0.455102	0.0498598	0.00612899	0.094521	0.114475	0.137021	0.136697	0.27937	0.0627045	0.382286	0.946017	0.682247	0.403038	0.255413	0.999752	0.412549
ENSFDAG00000003047	0.187321	-0.0246023	-0.023067	0.100087	-0.0113852	0.0676594	-0.56795	0.338074	0.0580922	0.00429405	0.0821683	0.1044	0.117451	0.118956	0.747327	0.918698	0.724829	0.726968	0.971891	0.843496	0.0996174	0.999752	0.320377
ENSFDAG00000003049	-0.496524	-0.220065	0.0582089	0.118579	0.216617	-0.0246582	0.0729434	0.116014	0.024671	0.00141873	0.0309667	0.0401201	0.043984	0.0448954	0.144908	0.161195	0.12225	0.500409	0.279491	0.906405	0.730652	0.999752	0.597275
ENSFDAG00000003052	0.383461	-0.13555	-0.0473725	-0.338056	0.12505	0.611854	0.694898	0.380189	0.101268	0.00445032	0.113796	0.149339	0.160007	0.165359	0.534007	0.67014	0.47763	0.31628	0.746248	0.126115	0.0874762	0.999752	0.31133
ENSFDAG00000003053	0.323063	-0.422282	-0.0202666	0.11518	0.200153	-0.209795	-0.174872	0.249843	0.0336129	0.00328734	0.0553893	0.0685978	0.0797659	0.0801241	0.518067	0.0212623	0.723732	0.624559	0.444748	0.457589	0.536716	0.999752	0.527929
ENSFDAG00000003055	0.922925	-0.260872	-0.0754358	-0.341019	0.188617	-0.136762	-0.0123457	0.263964	0.0283927	0.00356141	0.0545314	0.0659115	0.0790981	0.078863	0.0724371	0.121576	0.20621	0.144195	0.462533	0.626772	0.964935	0.999752	0.667207
ENSFDAG00000003058	0.630944	-0.0291363	-0.0791666	0.270502	-0.0426219	-0.0713485	-0.349484	0.315772	0.0455565	0.00411686	0.0717507	0.0895289	0.103102	0.103808	0.261521	0.891419	0.217263	0.312567	0.886727	0.824156	0.278052	0.999752	0.424135
ENSFDAG00000003061	-1.81782	0.422848	0.178096	0.0452579	0.623741	-0.0362089	-0.0336061	0.245999	0.0391027	0.00316291	0.0579631	0.0730651	0.0830442	0.0838857	0.000247249	0.0324877	0.00154163	0.85089	0.0210246	0.900009	0.907628	0.999752	0.652956
ENSFDAG00000003064	1.36107	-0.503325	-0.083668	0.714296	-0.217161	0.401682	0.864438	3.68236	0.225273	0.0517839	0.669266	0.763047	0.987825	0.967986	0.478152	0.288936	0.713117	0.382592	0.803668	0.686103	0.37961	0.999752	0.467004
ENSFDAG00000003068	0.103273	0.0368641	-0.00266022	-0.125408	-0.218299	-0.185401	-0.139812	0.0536178	0.00871713	0.000687023	0.0127454	0.0161034	0.0182481	0.018447	0.655599	0.692964	0.91916	0.266641	0.0853858	0.169916	0.303294	0.999752	0.435635
ENSFDAG00000003070	0.494533	-0.0738692	-0.0590888	0.013041	0.0286685	0.266634	0.0698193	0.0613437	0.0107487	0.000776666	0.0150298	0.0191333	0.0214713	0.0217609	0.0458591	0.476155	0.0339845	0.915286	0.835809	0.0688132	0.635999	0.999752	0.564146
ENSFDAG00000003071	0.170579	-0.259549	-0.00430469	0.636437	0.218363	-0.726831	-1.25965	1.93007	0.246238	0.0255615	0.42031	0.517558	0.60631	0.60795	0.902279	0.600941	0.97852	0.326257	0.761487	0.350593	0.106195	0.999752	0.323246
ENSFDAG00000003077	-0.647925	-0.0929904	0.0643945	0.432039	0.0724969	0.0655099	0.146672	0.136508	0.021339	0.00175953	0.0319581	0.0402149	0.0458097	0.0462478	0.0794889	0.524401	0.124748	0.0156596	0.717715	0.759547	0.495222	0.999752	0.510662
ENSFDAG00000003079	-0.138054	-0.0397983	0.0178187	0.028144	0.132902	-0.163387	-0.188587	0.144346	0.0250298	0.0018307	0.0352141	0.0447821	0.0503215	0.050982	0.716331	0.801384	0.677077	0.880782	0.529986	0.4664	0.403592	0.999752	0.47725
ENSFDAG00000003088	-0.480675	0.152808	0.0434855	-0.087265	0.116465	-0.00554301	0.277504	0.0626238	0.0106382	0.000796892	0.0151497	0.0192266	0.0216622	0.0219311	0.0547568	0.138465	0.123453	0.478332	0.400947	0.969958	0.0609483	0.999752	0.288778
ENSFDAG00000003093	-0.412192	0.0454135	0.044588	-0.214013	0.094375	-0.00447269	0.106843	0.0868999	0.0141813	0.00111283	0.0206874	0.026148	0.0296157	0.0299425	0.162033	0.702942	0.181352	0.136766	0.55947	0.979265	0.536937	0.999752	0.527996
ENSFDAG00000003094	-3.33915	0.933022	0.361226	-0.674556	-1.2544	-0.0495629	0.00519351	1.66955	0.162811	0.0227333	0.335669	0.40143	0.48844	0.485427	0.00975893	0.0207595	0.016585	0.244305	0.0477201	0.943464	0.994052	0.999752	0.674817
ENSFDAG00000003096	0.312061	-0.0474537	-0.06755	0.779796	0.566878	0.352393	0.0535328	0.349803	0.0272156	0.00484806	0.0666034	0.0777716	0.0976122	0.096321	0.597757	0.773616	0.331969	0.00251467	0.0420803	0.259356	0.863054	0.999752	0.640092
ENSFDAG00000003097	1.49472	0.281276	-0.151807	1.52249	0.416257	0.863978	-0.248188	4.66279	0.239673	0.0661253	0.824868	0.925549	1.22315	1.19315	0.488806	0.5656	0.554957	0.0936725	0.665251	0.434684	0.820258	0.999752	0.628593
ENSFDAG00000003098	0.0520328	0.0544748	-0.00274688	-0.0187911	-0.101801	-0.229463	-0.0651102	0.0855284	0.00923234	0.00115354	0.0176871	0.0213865	0.0256523	0.025579	0.858787	0.570752	0.93554	0.887637	0.486357	0.151949	0.68393	0.999752	0.581927
ENSFDAG00000003106	0.0246327	-0.105847	-0.0428841	0.788313	0.300019	0.536824	0.196764	0.261028	0.0202408	0.00361852	0.0496644	0.0579722	0.0727943	0.071824	0.961546	0.456883	0.475906	0.000404189	0.212743	0.0466262	0.462831	0.999752	0.500347
ENSFDAG00000003107	-0.197249	0.0539977	0.0187573	-0.21162	0.110831	0.0862024	0.280982	0.0551841	0.0146989	0.00064596	0.0165174	0.0216765	0.0232249	0.0240017	0.401094	0.656044	0.460502	0.099643	0.451584	0.571636	0.0697287	0.999752	0.29561
ENSFDAG00000003109	0.283437	0.0186859	-0.0364099	0.0578376	-0.012057	-0.093041	-0.159672	0.108144	0.0133874	0.0014373	0.02332	0.0286217	0.0336723	0.0337294	0.388743	0.871701	0.336861	0.704878	0.943185	0.61213	0.384623	0.999752	0.468895
ENSFDAG00000003120	-1.26754	1.25405	0.0656408	0.197878	0.169705	0.57283	-0.1087	0.281173	0.0576728	0.00346205	0.0738002	0.0953292	0.104941	0.106963	0.016829	1.77085e-07	0.264595	0.46637	0.582563	0.0770132	0.739615	0.999752	0.601154
ENSFDAG00000003123	1.06634	-0.0445835	-0.134538	0.297435	0.26967	-0.163021	-0.678599	0.574318	0.0979453	0.00730363	0.139158	0.176676	0.198957	0.201453	0.159405	0.886719	0.115427	0.425259	0.521153	0.714753	0.130557	0.999752	0.342633
ENSFDAG00000003127	1.44283	-0.0643369	-0.130722	-0.295414	-0.124421	0.189085	0.0381416	0.558258	0.0260328	0.00794922	0.0974972	0.108484	0.144919	0.141035	0.0534746	0.690078	0.142601	0.3441	0.705612	0.6194	0.919103	0.999752	0.655419
ENSFDAG00000003130	0.0281174	-0.0389373	-0.00321056	0.114018	-0.000563145	0.0018501	-0.104032	0.0377074	0.0100438	0.000441385	0.0112864	0.0148116	0.0158696	0.0164004	0.884871	0.697629	0.878542	0.283163	0.996308	0.988282	0.416595	0.999752	0.482388
ENSFDAG00000003132	1.23371	-1.74049	-0.0607581	0.0935503	0.179829	0.476437	1.5679	1.77862	0.189956	0.024014	0.366687	0.442867	0.532004	0.530299	0.354931	6.51246e-05	0.695001	0.877224	0.786988	0.513626	0.0313137	0.999752	0.258813
ENSFDAG00000003133	0.0920541	-0.0822307	0.0109261	-0.227514	-0.19261	-0.121361	0.0733097	0.0919631	0.00790493	0.00126533	0.0179115	0.0211338	0.026169	0.0259028	0.761468	0.355029	0.758723	0.0891361	0.185198	0.453124	0.64875	0.999752	0.569112
ENSFDAG00000003138	-0.108783	0.127008	0.00349573	-0.0247554	0.241656	0.140757	0.211476	0.205153	0.0194847	0.0027999	0.0409616	0.0488473	0.059655	0.0592364	0.810197	0.362885	0.947327	0.902649	0.274219	0.564414	0.384905	0.999752	0.468925
ENSFDAG00000003143	0.115349	-0.248426	0.00346181	-0.197225	0.10405	-0.623308	0.34054	0.566341	0.138509	0.00673873	0.16197	0.211857	0.228851	0.235148	0.878181	0.504448	0.966362	0.624094	0.821155	0.192594	0.482517	0.999752	0.506435
ENSFDAG00000003147	0.766987	-0.181955	-0.0758818	0.157639	-0.1092	0.110122	-0.473973	0.233764	0.062237	0.00273657	0.0699513	0.0917989	0.0983605	0.101647	0.11266	0.465783	0.146903	0.551157	0.718535	0.725493	0.137109	0.999752	0.346494
ENSFDAG00000003156	-0.597713	-0.164026	0.0564529	-0.0261154	0.976391	0.414675	0.31339	0.554946	0.147816	0.00649595	0.166104	0.217985	0.233556	0.241368	0.422347	0.669649	0.483659	0.948908	0.0365035	0.390865	0.523545	0.999752	0.522081
ENSFDAG00000003157	0.352552	-0.0572195	-0.0407303	0.194288	-0.022262	-0.0697215	-0.165863	0.139261	0.0213391	0.00180028	0.032356	0.0406309	0.0464082	0.0468205	0.344797	0.695278	0.337083	0.280092	0.912058	0.746207	0.443359	0.999752	0.492819
ENSFDAG00000003159	-0.421005	0.0367265	0.0505187	-0.322786	-0.0385113	0.194507	0.207023	0.0411062	0.00654509	0.000528386	0.00969195	0.0122193	0.013885	0.0140265	0.0378471	0.649855	0.0279676	0.00104266	0.727547	0.098804	0.0804624	0.999752	0.304139
ENSFDAG00000003160	0.097571	0.0842102	-0.0130087	-0.153941	0.00643568	0.0451218	0.279001	0.0979792	0.0117641	0.00130674	0.0209235	0.025595	0.0302416	0.0302621	0.755259	0.437514	0.718949	0.287223	0.967912	0.795274	0.108753	0.999752	0.323765
ENSFDAG00000003162	0.4315	-1.18258	0.0229898	-0.574085	0.871737	-1.34632	0.580429	0.877732	0.230078	0.010305	0.260425	0.341624	0.366574	0.378365	0.645104	0.0136846	0.820836	0.260608	0.135841	0.0261712	0.345368	0.999752	0.452086
ENSFDAG00000003168	-0.198886	-0.145827	0.0269417	-0.265016	0.062581	0.183063	0.524843	0.199651	0.0429029	0.00243662	0.0535552	0.0694434	0.0760424	0.0776513	0.65624	0.481411	0.585205	0.252138	0.812285	0.506785	0.0596386	0.999752	0.287425
ENSFDAG00000003170	0.39639	-0.13273	-0.0294034	-0.179272	-0.0224425	0.171752	-0.228685	0.154366	0.0279141	0.00194411	0.0383239	0.0489374	0.0546984	0.0554968	0.313024	0.426944	0.504858	0.359798	0.919194	0.462723	0.331677	0.999752	0.446805
ENSFDAG00000003174	0.04784	0.0252264	-0.00654142	-0.116174	-0.0755501	0.238861	0.217118	0.120129	0.0289403	0.00143363	0.0340906	0.044554	0.0482004	0.049485	0.890218	0.882116	0.862837	0.529216	0.7204	0.276606	0.329054	0.999752	0.445245
ENSFDAG00000003178	-1.37616	-0.351546	0.171396	-0.450092	0.111935	0.387997	0.932374	0.308211	0.0820955	0.00360777	0.0922521	0.121066	0.129714	0.134053	0.013182	0.219846	0.00432379	0.138372	0.747679	0.281349	0.0108794	0.999752	0.229812
ENSFDAG00000003179	0.503817	0.00967835	-0.0515795	-0.0658749	-0.112856	-0.251433	0.29683	0.35337	0.0369234	0.00478113	0.0724009	0.0872348	0.105117	0.104704	0.396696	0.95983	0.455695	0.806595	0.702386	0.43804	0.35897	0.999752	0.457643
ENSFDAG00000003191	0.0994308	0.0979609	-0.0159409	0.00686937	-0.109113	-0.0415776	-0.245615	0.141315	0.0252695	0.00178311	0.0349184	0.0445404	0.0498541	0.0505621	0.791394	0.537732	0.705798	0.970675	0.60515	0.852278	0.274701	0.999752	0.422751
ENSFDAG00000003192	0.635695	-0.0947703	-0.061189	-0.235254	0.0791416	-0.134818	0.203834	0.187013	0.0190091	0.0025369	0.0380235	0.045677	0.0552547	0.0549882	0.141566	0.491849	0.224424	0.227642	0.711158	0.566278	0.384713	0.999752	0.468895
ENSFDAG00000003194	-0.295503	0.0686807	0.0231364	0.325488	0.0411265	-0.213103	0.164904	0.177539	0.0472897	0.00207819	0.0531402	0.069738	0.0747195	0.0772187	0.483105	0.752132	0.611791	0.157961	0.876242	0.435625	0.552892	0.999752	0.533629
ENSFDAG00000003198	-0.167864	0.239664	0.0114255	-0.0418988	-0.253249	0.324232	-0.0888086	0.0957521	0.0230072	0.0011433	0.0271364	0.03546	0.0383723	0.0393893	0.587489	0.114095	0.735436	0.799228	0.178668	0.0978863	0.654534	0.999752	0.572014
ENSFDAG00000003202	-0.132788	0.0380882	0.0166052	-0.216178	0.401644	-0.187858	-0.216372	0.0567065	0.0142867	0.000670827	0.0164713	0.0215756	0.0232386	0.0239208	0.577101	0.749986	0.521446	0.0921031	0.00624962	0.217829	0.161817	0.999752	0.361939
ENSFDAG00000003211	0.173914	-0.272382	0.00239981	-0.0748843	-0.117287	-0.224637	-0.589428	0.349495	0.0651681	0.00437833	0.0879138	0.11259	0.125364	0.127331	0.76862	0.285975	0.971069	0.800609	0.726682	0.52579	0.0985706	0.999752	0.320296
ENSFDAG00000003214	0.257025	-0.0728754	-0.0220852	-0.100617	-0.00750017	-0.00685303	-0.0406304	0.0771486	0.0205494	0.000903066	0.0230917	0.0303042	0.0324689	0.0335549	0.354778	0.611193	0.462387	0.507887	0.965634	0.969662	0.824465	0.999752	0.629921
ENSFDAG00000003215	0.35273	-0.454905	-0.0310636	0.0900897	0.458595	0.0925782	0.387475	0.254103	0.0676834	0.00297442	0.076057	0.0998127	0.106942	0.110519	0.484089	0.0803677	0.568967	0.74392	0.146623	0.777103	0.243803	0.999752	0.405182
ENSFDAG00000003216	0.216221	-0.0212435	-0.0247314	0.0497646	0.0901581	-0.0669047	-0.185065	0.129235	0.0279643	0.00157513	0.0347809	0.0451239	0.0493739	0.0504331	0.547534	0.898913	0.533188	0.789593	0.671256	0.76334	0.409897	0.999752	0.479857
ENSFDAG00000003223	-0.392936	0.257202	0.0250343	0.201197	-0.0292059	0.309627	-0.0768288	0.418891	0.0486769	0.0056068	0.0885497	0.107934	0.12812	0.128067	0.543775	0.243707	0.738129	0.49896	0.929163	0.387023	0.830011	0.999752	0.631448
ENSFDAG00000003224	-0.0599526	0.0813123	-0.00871267	0.379424	0.21411	0.0804852	-0.372429	0.101742	0.0216212	0.00124436	0.0271485	0.0351714	0.0385616	0.0393595	0.850911	0.580271	0.804917	0.0212915	0.253589	0.681907	0.0604857	0.999752	0.287947
ENSFDAG00000003227	0.248112	-0.538548	0.00690758	-0.311535	-0.0514855	-0.207792	0.318687	0.100985	0.0252379	0.00119651	0.0292084	0.0382458	0.041226	0.0424147	0.434941	0.000698972	0.841718	0.0683252	0.792346	0.306121	0.121764	0.999752	0.336337
ENSFDAG00000003235	0.350913	-0.238155	-0.0256056	0.0716046	0.149251	-0.313636	-0.0735247	0.147126	0.0325513	0.00178547	0.0400207	0.0520099	0.0567698	0.0580428	0.360265	0.186834	0.544527	0.720395	0.512823	0.188062	0.760228	0.999752	0.607571
ENSFDAG00000003240	0.236242	-0.0720769	-0.0274922	0.0965382	-0.0307881	0.0442743	0.172893	0.142472	0.0182437	0.00188603	0.0310638	0.0382663	0.0448051	0.0449319	0.531391	0.593598	0.526704	0.583873	0.874938	0.83432	0.414704	0.999752	0.481531
ENSFDAG00000003243	0.315292	-0.0626239	-0.0431176	0.1423	0.09449	-0.0434291	-0.00484165	0.220552	0.0293942	0.00290538	0.0487383	0.0602995	0.0702087	0.0705017	0.501988	0.714913	0.42375	0.519206	0.70039	0.869808	0.985452	0.999752	0.672433
ENSFDAG00000003244	-0.349209	-0.471993	0.0371116	0.277646	0.447167	0.587123	0.479394	0.254341	0.0338186	0.00335147	0.0561606	0.0694649	0.0809067	0.081238	0.488666	0.0102702	0.52149	0.241362	0.0897666	0.0390055	0.0925786	0.999752	0.312976
ENSFDAG00000003258	-0.193798	0.0137149	0.0355558	0.406629	-0.199233	0.0840414	-1.32157	1.40648	0.171606	0.0187242	0.301886	0.369934	0.436103	0.436632	0.870195	0.973589	0.794986	0.459254	0.743239	0.898733	0.0454988	0.999752	0.27581
ENSFDAG00000003265	-0.149722	-0.0709778	0.0275196	-0.182982	0.00655054	0.115145	0.289525	0.0888607	0.0100567	0.00119273	0.0186342	0.0226482	0.0269845	0.0269496	0.615483	0.479087	0.425544	0.180097	0.965281	0.483333	0.0777932	0.999752	0.302375
ENSFDAG00000003267	0.575527	-0.0778393	-0.0524365	-0.221555	0.00238148	-0.189319	-0.345878	0.0523101	0.0128424	0.000621956	0.0149899	0.0196109	0.0211759	0.0217634	0.0118574	0.492163	0.0355018	0.0703581	0.986432	0.193262	0.0190499	0.999752	0.251858
ENSFDAG00000003278	-0.112439	-0.0543845	0.0196386	0.428274	0.150925	-0.780198	-0.64936	0.300119	0.0799403	0.00351306	0.0898302	0.117888	0.126309	0.130534	0.837381	0.847468	0.740391	0.153025	0.66025	0.0281443	0.0722854	0.999752	0.298915
ENSFDAG00000003281	-0.301611	0.0611631	0.0254759	-0.095994	0.105089	0.150543	0.442982	0.0765633	0.0179512	0.000918618	0.0214305	0.0279625	0.0303347	0.0310991	0.275701	0.648029	0.400601	0.511996	0.529712	0.387393	0.0120064	0.999752	0.230215
ENSFDAG00000003291	-0.236644	-0.36324	0.0636326	-0.245566	-0.109525	-0.110483	0.236033	0.10639	0.0112902	0.00143731	0.0218938	0.026424	0.031771	0.0316625	0.468137	0.000629534	0.0932629	0.0969911	0.500453	0.535364	0.18468	0.999752	0.376154
ENSFDAG00000003292	-0.258979	0.0481493	0.0280245	0.0862325	-0.0381122	-0.127882	0.0527996	0.149725	0.021863	0.0019488	0.0341703	0.0426916	0.0490827	0.0494387	0.503307	0.744698	0.525542	0.640862	0.853656	0.563787	0.812297	0.999752	0.625955
ENSFDAG00000003295	-0.353835	-0.16743	0.0559587	-0.214362	0.135922	-0.0933208	-0.584007	1.39852	0.223299	0.0179692	0.330097	0.416295	0.472869	0.477733	0.764785	0.723102	0.67635	0.709072	0.83315	0.892051	0.398145	0.999752	0.475018
ENSFDAG00000003296	-0.45199	0.328838	0.0152203	0.265371	0.0245817	0.267795	0.262321	0.118157	0.0192431	0.00151359	0.028106	0.0355175	0.0402385	0.0406796	0.188538	0.0177627	0.695635	0.113445	0.896223	0.181876	0.193395	0.999752	0.381417
ENSFDAG00000003297	-0.622322	1.02568	0.00303435	0.243648	-0.043177	0.965283	-0.373633	0.488126	0.107069	0.00593369	0.132227	0.171727	0.18762	0.191756	0.373071	0.001721	0.968578	0.50283	0.917017	0.0258466	0.393527	0.999752	0.47282
ENSFDAG00000003301	0.273264	0.0549437	-0.0246022	-0.250034	-0.119709	0.0904281	-0.0190215	0.0607753	0.0128019	0.000744566	0.01615	0.0209076	0.0229458	0.0234122	0.267664	0.627249	0.36726	0.0491269	0.40773	0.550528	0.901066	0.999752	0.650764
ENSFDAG00000003304	-0.197519	0.0577575	0.0237607	-0.170743	0.0174818	0.00611936	0.0770688	0.111653	0.0254864	0.00134672	0.0308382	0.0401664	0.043696	0.0447389	0.554442	0.71751	0.517328	0.330905	0.93049	0.976646	0.715586	0.999752	0.593494
ENSFDAG00000003306	0.0779671	0.0986582	-0.0148516	0.0515342	-0.329738	0.155771	-0.309894	0.206533	0.0236789	0.00276839	0.04348	0.0529205	0.0629375	0.0628832	0.863783	0.521432	0.777738	0.804796	0.151753	0.534656	0.216535	0.999752	0.391484
ENSFDAG00000003309	2.04397	-0.766045	-0.103978	-0.356625	-1.37895	1.45513	0.645203	3.98053	0.27766	0.0555602	0.741033	0.855752	1.08963	1.07172	0.305609	0.146009	0.659123	0.678669	0.136054	0.163318	0.533126	0.999752	0.526387
ENSFDAG00000003311	-0.332836	0.207771	0.0117953	0.069679	0.253803	0.274136	-0.131476	0.188786	0.0245537	0.00249443	0.0413757	0.0510554	0.059649	0.059849	0.443659	0.184856	0.813301	0.731934	0.261331	0.261675	0.590973	0.999752	0.548565
ENSFDAG00000003319	-0.132823	-0.0574836	0.0187707	-0.103866	0.14331	-0.215674	0.107422	0.0697996	0.0169488	0.000831698	0.0198884	0.0260042	0.0281102	0.0288719	0.615144	0.658818	0.515126	0.461424	0.374164	0.198314	0.527254	0.999752	0.524025
ENSFDAG00000003322	-0.640957	0.206293	0.0600455	-0.0868392	0.219887	0.0534043	0.160977	0.090422	0.0228198	0.00106932	0.0262882	0.0344371	0.0370854	0.0381782	0.0330454	0.17206	0.0663242	0.592239	0.236053	0.781538	0.410016	0.999752	0.479857
ENSFDAG00000003334	0.657149	-0.0613262	-0.0771538	0.462431	0.0868391	-0.112174	-0.428937	0.1387	0.0229885	0.00177189	0.0332229	0.0420587	0.0475393	0.0480891	0.0776451	0.685864	0.0668171	0.0111791	0.671977	0.606919	0.0504646	0.999752	0.278455
ENSFDAG00000003335	0.288968	-0.666766	0.0118956	-0.501946	-0.189019	0.158945	0.39906	0.245219	0.0316362	0.00324328	0.0535991	0.0660803	0.0772906	0.0775287	0.559528	0.00017775	0.834543	0.0301516	0.462153	0.567513	0.151801	0.999752	0.35408
ENSFDAG00000003336	0.324902	-0.12548	-0.0243302	-0.0767576	0.0410237	-0.0153857	0.113061	0.0464112	0.00359057	0.000643481	0.00882601	0.0103	0.0129374	0.0127641	0.131519	0.0362534	0.337493	0.41391	0.686051	0.8924	0.316956	0.999752	0.441345
ENSFDAG00000003337	4.6335	-0.969739	-0.392713	-0.0693359	-1.78184	0.855933	0.644893	5.85641	0.457116	0.0811483	1.11586	1.3034	1.63521	1.61374	0.055535	0.151485	0.168021	0.947666	0.118585	0.503272	0.611693	0.999752	0.555112
ENSFDAG00000003338	0.289196	-0.0271359	-0.0388119	0.513163	-0.0192634	0.0651575	-0.0767173	0.27966	0.0217687	0.00387578	0.0532534	0.0621862	0.0780457	0.0770144	0.584474	0.854076	0.533004	0.0261669	0.938427	0.81558	0.782207	0.999752	0.615937
ENSFDAG00000003343	0.329493	-0.0860116	-0.0457229	0.282864	-0.0394828	0.0116193	-0.0356493	0.392664	0.0586936	0.00509419	0.0903883	0.113209	0.129742	0.130785	0.599015	0.722569	0.521774	0.346781	0.906586	0.974266	0.921475	0.999752	0.655778
ENSFDAG00000003347	0.126681	-0.297058	-0.0471273	0.479541	-0.11513	-0.139553	0.222282	0.997286	0.105007	0.0134835	0.204773	0.246934	0.297231	0.296139	0.899057	0.359295	0.684849	0.289275	0.816783	0.797972	0.682931	0.999752	0.581927
ENSFDAG00000003350	-0.366033	-0.168016	0.0418509	0.0148425	0.200426	0.0360873	0.119648	0.0887981	0.0136935	0.00114686	0.0206812	0.0259876	0.0296572	0.0299272	0.219319	0.15106	0.216532	0.917797	0.213763	0.834018	0.489169	0.999752	0.508578
ENSFDAG00000003352	0.426021	-0.37527	-0.0109027	-0.54367	-0.0962205	-0.318249	-0.137487	0.147546	0.0270986	0.00185326	0.0368737	0.0471558	0.0526047	0.0534015	0.26739	0.0226276	0.800068	0.00463671	0.657695	0.165268	0.551873	0.999752	0.533411
ENSFDAG00000003357	-0.0476969	-0.0455587	0.00792797	-0.0710362	0.128034	0.0283978	-0.0992108	0.079785	0.00637687	0.00110369	0.0152815	0.0178937	0.0223775	0.0220997	0.865906	0.568328	0.811387	0.565534	0.338497	0.849437	0.504536	0.999752	0.514087
ENSFDAG00000003358	0.322554	-0.1756	-0.0357302	-0.0344	0.00022544	-0.253323	0.00447705	0.382773	0.0537991	0.00500793	0.0861649	0.107215	0.123915	0.124654	0.602121	0.449007	0.613628	0.906709	0.999451	0.471749	0.989883	0.999752	0.673649
ENSFDAG00000003362	-0.688498	0.161819	0.060718	0.189356	0.11001	0.244475	0.42809	0.1716	0.0268087	0.00221204	0.0401643	0.0505382	0.0575738	0.0581232	0.0965023	0.323002	0.196709	0.34474	0.624591	0.308261	0.0757886	0.999752	0.300477
ENSFDAG00000003367	-0.400107	0.0660018	0.0428858	-0.0997948	0.0547039	0.0521899	0.108942	0.0717641	0.0191152	0.000840037	0.0214801	0.0281892	0.0302028	0.031213	0.135291	0.63309	0.138962	0.495928	0.744561	0.763944	0.537476	0.999752	0.528124
ENSFDAG00000003371	-0.250361	0.173311	0.0176563	0.0309574	-0.0441128	0.0646722	0.0962295	0.0410454	0.0109329	0.000480459	0.0122855	0.0161228	0.0172744	0.0178522	0.216547	0.0974144	0.420524	0.780016	0.728282	0.622679	0.471393	0.999752	0.503098
ENSFDAG00000003375	-0.701225	0.0903079	0.0644934	0.30316	0.320422	-0.0414792	-0.040394	0.0736756	0.0175611	0.0008811	0.0207946	0.0271603	0.0294148	0.0301815	0.00978257	0.495571	0.0298017	0.0355264	0.0518637	0.808896	0.81614	0.999752	0.627559
ENSFDAG00000003380	0.455303	-0.606986	-0.0327772	0.643989	0.396557	-0.224622	0.0595039	0.354861	0.0504802	0.0046353	0.0802253	0.0999531	0.11533	0.116065	0.44468	0.00690107	0.630211	0.0229872	0.209726	0.50834	0.861346	0.999752	0.63957
ENSFDAG00000003386	0.123087	0.0822013	-0.0185258	-0.00777004	-0.0007802	0.109528	-0.107657	0.0243326	0.00648127	0.000284826	0.00728311	0.00955792	0.0102407	0.0105832	0.430069	0.307229	0.272333	0.927455	0.993633	0.279104	0.295335	0.999752	0.431879
ENSFDAG00000003392	0.108625	0.196411	-0.0297897	0.085	0.0191177	0.0635866	0.248039	0.15468	0.0196871	0.00204913	0.0336581	0.0414348	0.0485564	0.0486839	0.7824	0.161566	0.510484	0.64314	0.925174	0.772915	0.260946	0.999752	0.415507
ENSFDAG00000003393	-0.417808	-0.0248425	0.0599986	-0.0342308	0.115578	-0.445396	-0.397627	0.229042	0.0609812	0.00268128	0.0685392	0.0899459	0.0963748	0.0995948	0.382658	0.919868	0.24658	0.895972	0.699958	0.151369	0.207683	0.999752	0.388129
ENSFDAG00000003399	-0.051314	-0.0198278	0.00201007	0.00713306	0.105221	-0.147015	0.139533	0.0886546	0.0119812	0.00116582	0.0196849	0.024391	0.0283441	0.0284757	0.86317	0.856254	0.953055	0.959453	0.50048	0.382537	0.408309	0.999752	0.479283
ENSFDAG00000003400	-0.728264	0.178335	0.0728165	-0.39979	-0.0742823	-0.646798	-0.140417	0.613402	0.0612571	0.00833451	0.124116	0.148813	0.180465	0.179491	0.352445	0.471193	0.425098	0.25646	0.847304	0.127871	0.740315	0.999752	0.601154
ENSFDAG00000003404	0.0778039	0.128243	-0.0285446	-0.0111616	0.120799	-0.109883	-0.192329	0.284169	0.0175384	0.00399431	0.0517257	0.0590234	0.0763274	0.0748126	0.883959	0.332864	0.651521	0.960859	0.619032	0.690828	0.481953	0.999752	0.506371
ENSFDAG00000003406	-0.0477308	0.100053	-0.000262189	-0.0615513	-0.01825	0.117113	0.138237	0.0313552	0.00651827	0.000385099	0.00828107	0.0107089	0.0117705	0.0120035	0.787505	0.215248	0.98934	0.498796	0.860014	0.28038	0.207043	0.999752	0.388032
ENSFDAG00000003407	-0.212189	-0.0715265	0.035264	-0.268502	0.0308137	0.0565322	0.351609	0.134033	0.0241676	0.00168885	0.0332354	0.0424278	0.0474397	0.0481273	0.562195	0.645446	0.39084	0.140802	0.881084	0.795209	0.108991	0.999752	0.324226
ENSFDAG00000003408	0.62537	0.336912	-0.0977517	0.228859	0.178272	-0.19241	-0.385204	0.495316	0.0768126	0.00639193	0.115606	0.145354	0.165753	0.167293	0.374229	0.224128	0.221455	0.500886	0.640074	0.636496	0.346303	0.999752	0.452313
ENSFDAG00000003409	0.0230317	0.00986116	-0.00571915	-0.0719041	0.0450906	-0.0983307	0.162857	0.074632	0.00892485	0.000995808	0.0159175	0.0194628	0.0230093	0.0230217	0.932812	0.916866	0.856183	0.56873	0.746537	0.516828	0.283119	0.999752	0.426075
ENSFDAG00000003444	0.0272187	0.126497	-0.000353005	0.0590237	-0.390584	-0.0455052	-0.239679	0.347138	0.0595698	0.00441014	0.084325	0.107126	0.120539	0.122077	0.963153	0.604261	0.995759	0.838933	0.232733	0.895721	0.492725	0.999752	0.509747
ENSFDAG00000003447	-0.158911	-0.0475919	0.0231136	-0.155073	-0.043034	0.0897749	0.147661	0.0270433	0.00297427	0.000364058	0.00562304	0.00681299	0.00815036	0.00813211	0.333881	0.382851	0.225748	0.0386396	0.602112	0.320022	0.101539	0.999752	0.321054
ENSFDAG00000003448	0.00101718	0.162622	0.00826162	-0.314113	-0.206694	-0.143502	-0.387352	0.21354	0.0558219	0.00250835	0.0632636	0.0829824	0.0890654	0.0919117	0.998244	0.491266	0.868978	0.211721	0.473052	0.630627	0.201365	0.999752	0.385703
ENSFDAG00000003459	0.340172	0.188582	-0.0376017	0.0360639	-0.163562	0.0425482	-0.24839	0.0496067	0.00711284	0.000647286	0.0112468	0.0140243	0.0161642	0.0162714	0.126682	0.0253491	0.139421	0.73381	0.167231	0.737881	0.0515048	0.999752	0.279946
ENSFDAG00000003460	-0.0916671	-0.163917	0.0163446	0.0272918	-0.0313096	-0.0268011	-0.0875131	0.152977	0.0227561	0.00198598	0.0351512	0.0440035	0.0504629	0.0508605	0.814698	0.277208	0.713796	0.884263	0.881351	0.905032	0.697983	0.999752	0.587471
ENSFDAG00000003464	0.449537	-0.353766	-0.0449751	-0.260579	0.716285	0.18723	0.432981	0.970782	0.258579	0.0113635	0.29057	0.381327	0.408565	0.422231	0.648209	0.486619	0.673094	0.628806	0.246071	0.769585	0.505196	0.999752	0.514087
ENSFDAG00000003472	0.235382	0.0311879	-0.0203248	-0.215774	-0.0818855	-0.0801101	0.161926	0.0435279	0.00581352	0.000573251	0.0096259	0.011912	0.0138654	0.0139243	0.259232	0.682509	0.39594	0.0278588	0.453095	0.496295	0.169988	0.999752	0.367117
ENSFDAG00000003474	0.931463	-0.473767	-0.0461509	-0.130849	-0.862256	-0.890976	-0.621118	0.418867	0.110502	0.00491181	0.124714	0.163628	0.175473	0.181205	0.150088	0.154097	0.510214	0.710993	0.0330391	0.0334229	0.144534	0.999752	0.350894
ENSFDAG00000003475	-0.21408	-0.75372	0.0805773	-0.784998	-0.151789	0.125424	0.529365	0.926652	0.198125	0.0113202	0.247975	0.321413	0.352154	0.35953	0.824009	0.0903934	0.448852	0.114935	0.788902	0.83261	0.377316	0.999752	0.466434
ENSFDAG00000003478	0.214062	-0.0255964	-0.0115899	-0.244784	-0.111864	-0.0763408	0.166263	0.081847	0.00788069	0.00111571	0.0164004	0.0195865	0.0238744	0.0237174	0.454318	0.773091	0.728606	0.0559504	0.424117	0.621255	0.28032	0.999752	0.424939
ENSFDAG00000003486	-0.227957	-0.125837	0.0402993	0.166948	-0.019887	0.054022	0.0798433	0.374037	0.0071463	0.00545279	0.0620638	0.065183	0.0936154	0.0898104	0.709348	0.136603	0.585243	0.502772	0.937912	0.859853	0.789912	0.999752	0.617808
ENSFDAG00000003489	-0.220229	0.167354	0.0185694	0.215945	-0.190454	0.267478	-0.576217	0.303101	0.0526844	0.00384262	0.0740164	0.0941498	0.105763	0.10716	0.689143	0.465933	0.764512	0.427345	0.534799	0.410808	0.078369	0.999752	0.302375
ENSFDAG00000003491	0.420617	-0.205947	-0.0560985	0.453497	0.0534697	0.15637	-0.286562	0.608868	0.0824183	0.00800504	0.135269	0.167637	0.194763	0.195677	0.589855	0.473146	0.530657	0.217563	0.896097	0.723095	0.517107	0.999752	0.518695
ENSFDAG00000003498	0.0219485	-0.00586133	0.0017978	-0.167802	-0.0698375	-0.0716006	0.101409	0.0676853	0.0126894	0.000847132	0.0170659	0.0218671	0.0243319	0.0247184	0.932767	0.958503	0.950747	0.198969	0.636732	0.646222	0.51892	0.999752	0.519495
ENSFDAG00000003500	0.118348	0.00622579	-0.00540589	-0.0682446	-0.220818	-0.162635	-0.192411	0.0535742	0.0116259	0.000652606	0.0144381	0.0187359	0.020494	0.0209361	0.609134	0.953955	0.832409	0.570067	0.106694	0.255932	0.18359	0.999752	0.375724
ENSFDAG00000003501	-0.466105	-0.0210148	0.0646536	-0.41316	-0.136766	-0.076038	0.197553	0.736594	0.1962	0.00862223	0.220474	0.289336	0.310004	0.320373	0.58707	0.96216	0.486254	0.378906	0.799295	0.891373	0.727071	0.999752	0.596383
ENSFDAG00000003504	-0.374454	-0.0348672	0.0566653	-0.512108	-0.0287408	-0.0895283	0.0706154	0.114262	0.030349	0.0013382	0.0341472	0.0448098	0.0480232	0.0496183	0.267963	0.841367	0.121377	0.00558319	0.892001	0.682877	0.751233	0.999752	0.60428
ENSFDAG00000003506	0.0512327	0.0752569	-0.00836996	-0.0395994	-0.013582	-0.0856928	0.088753	0.0468446	0.00598397	0.000620305	0.0102055	0.0125685	0.0147212	0.0147617	0.812881	0.330622	0.736823	0.695069	0.903572	0.480018	0.46509	0.999752	0.501095
ENSFDAG00000003509	0.816188	-0.420244	-0.0607418	0.00564679	-0.0278253	-0.706125	0.258483	0.258574	0.0344047	0.00340695	0.0571083	0.0706423	0.0822703	0.082609	0.108475	0.023473	0.298038	0.981148	0.916621	0.0138226	0.368478	0.999752	0.462294
ENSFDAG00000003510	1.09852	-0.101592	-0.13067	0.246852	0.0580291	0.0362444	-0.678426	0.695232	0.10028	0.00906431	0.157961	0.197095	0.226983	0.228535	0.18768	0.748352	0.169913	0.534533	0.896005	0.939359	0.155858	0.999752	0.357626
ENSFDAG00000003517	1.80662	-0.123082	-0.219667	0.409296	0.0436414	0.0776787	-0.693643	1.39912	0.241412	0.0177589	0.34063	0.43297	0.486836	0.493142	0.126672	0.802197	0.0992755	0.483124	0.94712	0.911355	0.323272	0.999752	0.442798
ENSFDAG00000003520	1.29601	-0.0971617	-0.118971	-0.338941	0.00464189	-0.0239417	0.101091	0.346067	0.0346794	0.00470066	0.070089	0.0840671	0.101898	0.10136	0.0275899	0.601847	0.0826979	0.200453	0.987227	0.940213	0.750843	0.999752	0.604196
ENSFDAG00000003523	1.02271	-0.331527	-0.105061	0.174696	-0.145441	-0.421916	-0.255779	0.514305	0.0990773	0.00640592	0.131227	0.16857	0.18695	0.190105	0.153846	0.292226	0.189301	0.629629	0.723161	0.329161	0.557448	0.999752	0.535582
ENSFDAG00000003533	0.759711	0.0924436	-0.0820273	0.0147271	-0.379952	-0.163593	-0.347682	0.327382	0.0759379	0.00393631	0.0911444	0.118843	0.129068	0.13225	0.184256	0.737274	0.191072	0.961094	0.270394	0.648851	0.339043	0.999752	0.449794
ENSFDAG00000003534	0.295023	0.202141	-0.07947	-0.281275	-0.121832	-0.00337163	0.28463	0.831556	0.0633738	0.0115411	0.157628	0.183669	0.231163	0.227962	0.746296	0.421993	0.459457	0.478661	0.776198	0.994405	0.55108	0.999752	0.533172
ENSFDAG00000003541	-1.53381	0.087222	0.180284	0.260399	-0.340265	-0.246027	-0.382543	0.563936	0.0978513	0.00715146	0.137613	0.175015	0.196647	0.199232	0.0411043	0.780374	0.033018	0.482706	0.416014	0.57903	0.391424	0.999752	0.472089
ENSFDAG00000003555	1.20031	-0.176507	-0.134751	0.277812	0.0176337	-0.167969	-0.544389	0.84688	0.117978	0.011093	0.190041	0.236244	0.273378	0.274926	0.192127	0.607335	0.200756	0.523945	0.971059	0.748018	0.299154	0.999752	0.433345
ENSFDAG00000003556	-0.350688	-0.0882701	0.0315689	0.350608	-0.166408	0.231977	0.151205	0.270011	0.0566497	0.00331045	0.0716171	0.0926845	0.101766	0.103818	0.499748	0.710739	0.583227	0.190152	0.584654	0.467114	0.638872	0.999752	0.565627
ENSFDAG00000003557	0.427744	-0.149172	-0.0614475	0.543812	0.365791	0.0658837	0.196513	0.104729	0.0217811	0.00128615	0.027665	0.0357771	0.0393219	0.0401009	0.186249	0.312133	0.0866396	0.00107733	0.0531274	0.739703	0.32643	0.999752	0.443902
ENSFDAG00000003558	-0.13982	0.0583487	0.0195198	0.0130867	0.0175857	-0.0026615	0.202837	0.113948	0.00880816	0.00157995	0.0216655	0.0252816	0.0317587	0.0313325	0.678723	0.534132	0.623369	0.929154	0.911933	0.988084	0.251833	0.999752	0.41012
ENSFDAG00000003560	-0.541567	0.249401	0.0547392	-0.161556	0.00179872	0.167228	-0.00338915	0.368606	0.0846703	0.0044405	0.102125	0.133074	0.144671	0.148168	0.372386	0.391389	0.411388	0.613178	0.996066	0.660183	0.992975	0.999752	0.674526
ENSFDAG00000003561	0.251773	-0.0844933	-0.0248504	-0.0903215	0.146918	-0.099341	0.184195	0.0499643	0.0100322	0.000617652	0.0129871	0.0167448	0.0184791	0.0188197	0.260011	0.398906	0.317353	0.428031	0.256222	0.464912	0.179377	0.999752	0.372643
ENSFDAG00000003566	0.73028	-0.902047	-0.0588551	-0.0645677	0.716633	-0.797726	0.21738	0.903082	0.108345	0.0120454	0.192805	0.235832	0.278677	0.278858	0.442209	0.00613524	0.59178	0.883095	0.140027	0.130754	0.680596	0.999752	0.581586
ENSFDAG00000003567	-0.0510161	0.172932	-0.0211959	0.200043	0.153399	0.712609	0.420814	0.103268	0.0233264	0.00124815	0.0283755	0.0369316	0.0402217	0.0411617	0.873863	0.25752	0.548536	0.235011	0.424743	0.000380562	0.0380638	0.999752	0.269091
ENSFDAG00000003575	1.38901	-0.320527	-0.163586	0.333958	-0.0974071	0.168327	-0.437328	0.828246	0.134416	0.0106155	0.196743	0.248533	0.2817	0.284754	0.126947	0.381977	0.112347	0.451504	0.845089	0.751131	0.412476	0.999752	0.481415
ENSFDAG00000003587	-0.0585676	-0.0393086	0.0192128	-0.331288	0.00069284	-0.0138543	0.101465	0.0783435	0.00960768	0.00104237	0.016843	0.0206511	0.0243274	0.024361	0.834257	0.688397	0.551786	0.0106899	0.996153	0.929221	0.515638	0.999752	0.51765
ENSFDAG00000003588	-0.0233245	0.0104669	0.00765821	-0.157799	-0.0264634	-0.0185721	-0.417211	0.0975947	0.0151914	0.00125874	0.0228109	0.0286918	0.0327021	0.0330101	0.940484	0.932324	0.829102	0.296117	0.875851	0.9182	0.0216578	0.999752	0.253106
ENSFDAG00000003589	-0.523721	0.192173	0.00103704	1.20119	0.629083	-0.0496934	-0.574043	0.982129	0.0979776	0.0133458	0.198668	0.238174	0.288874	0.287305	0.597177	0.539252	0.992838	0.0070402	0.197389	0.926334	0.284188	0.999752	0.426075
ENSFDAG00000003590	1.99221	-0.366436	-0.207762	-0.694542	0.335886	0.813339	-0.172737	0.95777	0.249866	0.0112547	0.283439	0.371761	0.399089	0.411782	0.0417854	0.463516	0.0501845	0.192038	0.581713	0.197931	0.787787	0.999752	0.617302
ENSFDAG00000003591	-0.482647	-0.0396494	0.0418925	0.103214	-0.0814926	-0.0275046	-0.0799695	0.299577	0.0202015	0.00419	0.0554092	0.0637726	0.0815558	0.0801366	0.37788	0.780274	0.517511	0.661039	0.746921	0.923273	0.777565	0.999752	0.614564
ENSFDAG00000003595	0.694093	-0.227136	-0.0608875	0.0012163	-0.157732	-0.0351468	-0.164607	0.1331	0.0336355	0.00157362	0.0387232	0.0507298	0.054624	0.0562384	0.0571034	0.21554	0.12481	0.995068	0.483737	0.880464	0.487609	0.999752	0.507799
ENSFDAG00000003602	0.34483	-0.101158	-0.0241952	-0.284098	-0.0789885	-0.267187	0.171973	0.113155	0.0301401	0.00132454	0.0338689	0.0444475	0.0476225	0.0492154	0.305313	0.560112	0.506172	0.122657	0.707912	0.220817	0.438227	0.999752	0.490689
ENSFDAG00000003603	0.33543	-0.108195	-0.0176389	-0.31976	-0.0706276	-0.0901832	-0.0870329	0.136332	0.0274054	0.00168496	0.0354551	0.0457184	0.0504466	0.0513788	0.363638	0.513394	0.667406	0.0894733	0.741162	0.688036	0.701004	0.999752	0.588694
ENSFDAG00000003605	-0.565091	0.28639	0.027206	0.713402	0.327334	0.318597	0.103945	0.218784	0.0310564	0.00285865	0.0494239	0.0615635	0.0710555	0.071503	0.227001	0.104139	0.610862	0.0013321	0.187084	0.232007	0.697482	0.999752	0.587471
ENSFDAG00000003614	0.792705	-0.0802715	-0.0678546	-0.321468	-0.307584	-0.630551	-0.2699	0.182958	0.0281692	0.00236352	0.0425855	0.0535033	0.0610714	0.061624	0.0638453	0.632457	0.162798	0.119284	0.183597	0.010725	0.276928	0.999752	0.423267
ENSFDAG00000003618	-0.0476518	-0.0240651	0.00420886	-0.00951155	0.146108	-0.126277	-0.0303287	0.0704628	0.0163565	0.000847093	0.0196245	0.0255895	0.0277891	0.0284752	0.857534	0.850746	0.885019	0.945867	0.361051	0.448746	0.857365	0.999752	0.637871
ENSFDAG00000003619	-1.00853	-0.0825994	0.114382	-0.237502	0.0198211	0.161905	0.53407	0.175392	0.0317025	0.00220907	0.0435359	0.0555905	0.062138	0.0630441	0.0160336	0.642715	0.0149486	0.25501	0.933003	0.516012	0.0334164	0.999752	0.261979
ENSFDAG00000003629	0.638522	-0.105111	-0.0619525	0.107555	-0.263083	0.0440756	-0.0773622	0.0921804	0.00783242	0.00126944	0.0179047	0.0211	0.0261687	0.025893	0.0354583	0.234958	0.082068	0.421512	0.0701196	0.785266	0.63068	0.999752	0.561883
ENSFDAG00000003635	1.14356	-0.4786	-0.0743142	-0.475094	-0.62572	-1.02427	0.124913	0.925363	0.1868	0.0114279	0.241114	0.311025	0.343022	0.349416	0.234526	0.268144	0.48695	0.333275	0.261873	0.0803161	0.832639	0.999752	0.631539
ENSFDAG00000003637	0.55155	0.0467203	-0.0589352	-0.214955	0.108684	-0.06598	0.0489527	0.182289	0.0161476	0.00250224	0.0357626	0.0423309	0.0521999	0.051718	0.196417	0.713123	0.238726	0.255678	0.597327	0.772745	0.829568	0.999752	0.631345
ENSFDAG00000003638	0.113405	-0.196525	0.00254238	0.104993	0.0389324	-0.324306	-0.0643385	0.134667	0.0107248	0.00186337	0.0257727	0.030167	0.0377445	0.0372718	0.757299	0.0577383	0.953034	0.513109	0.822638	0.0950629	0.73894	0.999752	0.601154
ENSFDAG00000003641	-0.232184	-0.0464965	0.0179534	-0.047278	0.310235	0.112783	0.691366	0.0867851	0.0206643	0.00103809	0.0244818	0.0319741	0.0346319	0.0355327	0.430607	0.746353	0.577375	0.76253	0.0827461	0.544483	0.000244741	0.999752	0.186507
ENSFDAG00000003642	-0.592521	0.101558	0.0107024	2.82643	1.96533	0.957674	0.277632	4.77058	0.310436	0.0668605	0.876544	1.00533	1.2915	1.26774	0.786175	0.855367	0.966985	0.0025368	0.0499824	0.399399	0.805235	0.999752	0.623245
ENSFDAG00000003645	-1.69379	-0.192056	0.199227	-0.527141	0.318345	0.121799	-0.159906	0.415157	0.0582008	0.00543348	0.0933698	0.116148	0.134288	0.135077	0.00856925	0.425978	0.00687652	0.0845027	0.350255	0.739608	0.663501	0.999752	0.574878
ENSFDAG00000003648	0.480325	0.0444723	-0.0431665	-0.535311	0.168275	-0.218391	0.0645736	0.510401	0.0483266	0.0069677	0.101827	0.12139	0.148312	0.147256	0.501377	0.839682	0.605064	0.0934351	0.629109	0.570657	0.866367	0.999752	0.641675
ENSFDAG00000003652	-0.433223	0.0450216	0.0453025	-0.213289	0.147239	-0.214747	0.0921102	0.0891141	0.0122118	0.00116978	0.0198824	0.0246726	0.028616	0.0287622	0.146714	0.683707	0.185318	0.130373	0.348565	0.204273	0.587047	0.999752	0.54708
ENSFDAG00000003654	-0.376146	-0.0566872	0.0498946	-0.189582	0.0128878	-0.177146	0.0377093	0.0754662	0.0162204	0.000920982	0.0202455	0.0262521	0.0287461	0.0293545	0.170923	0.65625	0.100155	0.182731	0.936601	0.296104	0.825797	0.999752	0.63032
ENSFDAG00000003664	0.433823	-0.25964	-0.0283099	-0.170426	0.0493298	-0.155226	-0.0314818	0.123208	0.0265822	0.00150252	0.0331127	0.0429497	0.0470101	0.0480127	0.216485	0.111275	0.465178	0.348981	0.811859	0.474036	0.885757	0.999752	0.64716
ENSFDAG00000003669	0.275295	-0.257356	-0.00467332	-0.265261	-0.26577	-0.138706	0.0943646	0.0602028	0.00843966	0.000787922	0.0135396	0.0168427	0.0194732	0.0195876	0.261865	0.00508849	0.867772	0.0226278	0.0405737	0.320232	0.500155	0.999752	0.512647
ENSFDAG00000003670	-0.480993	-0.0440789	0.0420077	0.208661	0.0621263	0.0516742	-0.0550796	0.222832	0.0252241	0.00299089	0.0467313	0.0567987	0.0676717	0.0675847	0.308231	0.781367	0.442416	0.334423	0.79434	0.842543	0.832209	0.999752	0.631539
ENSFDAG00000003674	-0.268105	-0.0741859	0.0406108	-0.0728862	-0.048307	-0.100018	-0.302571	0.0927647	0.0176159	0.00115839	0.0235205	0.0301738	0.0335221	0.0340702	0.378715	0.5762	0.23279	0.634609	0.780938	0.584876	0.101165	0.999752	0.321054
ENSFDAG00000003679	-0.160028	0.0377511	0.0232722	-0.272552	0.109939	0.0747992	0.0912562	0.135844	0.0215426	0.00174722	0.0319791	0.0403013	0.0458199	0.0462805	0.664152	0.79702	0.577695	0.12748	0.583941	0.726761	0.671425	0.999752	0.577321
ENSFDAG00000003682	-0.546625	-0.186286	0.0194357	0.554707	0.304879	0.338666	0.286062	0.592996	0.0386942	0.00830964	0.109011	0.125061	0.160605	0.157662	0.4778	0.343632	0.831163	0.0929436	0.388624	0.398072	0.471256	0.999752	0.503098
ENSFDAG00000003683	-1.91343	0.042205	0.170685	0.159489	0.452715	0.83329	0.51785	1.15934	0.151691	0.0153072	0.254602	0.314368	0.366975	0.368279	0.0755547	0.913707	0.167716	0.751941	0.419418	0.168959	0.393478	0.999752	0.47282
ENSFDAG00000003686	0.0688852	-0.123717	-0.00262348	0.101039	-0.0182523	-0.532056	0.0352639	0.387826	0.0924517	0.00463798	0.109469	0.14298	0.154847	0.158884	0.911923	0.684093	0.969271	0.760075	0.961501	0.176346	0.929504	0.999752	0.657911
ENSFDAG00000003689	-0.118825	0.0958654	0.00673949	-0.120014	0.169723	-0.229238	0.0894156	0.146807	0.0295832	0.0018136	0.0382216	0.0492962	0.0543789	0.0553888	0.756466	0.577279	0.874256	0.539301	0.444615	0.325588	0.703998	0.999752	0.589763
ENSFDAG00000003690	-0.0910749	-0.179152	0.0216676	-0.037906	0.0770438	-0.261174	0.0502256	0.0383685	0.0102199	0.000449124	0.0114843	0.0150713	0.0161478	0.016688	0.641964	0.0763708	0.306585	0.723551	0.530285	0.039851	0.697426	0.999752	0.587471
ENSFDAG00000003694	0.104556	0.28004	-0.0290729	0.177772	-0.136849	0.25694	-0.387905	0.166442	0.0246713	0.00216188	0.0381951	0.047796	0.0548387	0.0552642	0.797734	0.0746044	0.531789	0.363024	0.53134	0.272552	0.098928	0.999752	0.320296
ENSFDAG00000003699	0.761623	-0.0239112	-0.120398	0.173119	-0.0971277	1.4788	1.29749	1.06961	0.0463989	0.0152727	0.185213	0.204859	0.275761	0.267931	0.461473	0.911611	0.329943	0.68749	0.830084	0.00486149	0.0121885	0.999752	0.230215
ENSFDAG00000003700	-0.390153	0.197725	0.0266928	0.207009	0.168668	0.173495	-0.0219997	0.293722	0.0782363	0.00343817	0.0879153	0.115375	0.123616	0.127751	0.471592	0.479629	0.648944	0.485075	0.619495	0.621691	0.95092	0.999752	0.664046
ENSFDAG00000003701	3.35177	-0.183227	-0.28521	-0.652646	-2.18914	-1.27785	-0.140758	5.3498	0.161778	0.0772435	0.89838	0.96788	1.34708	1.29983	0.147303	0.648719	0.304796	0.491094	0.0260702	0.270899	0.901742	0.999752	0.650873
ENSFDAG00000003702	1.05182	-0.0192902	-0.109124	-0.235615	0.0400109	0.0100189	0.0621441	0.21914	0.0134999	0.00308055	0.0398761	0.0454939	0.0588449	0.0576741	0.0246469	0.868138	0.0492872	0.238038	0.851201	0.967055	0.795815	0.999752	0.619834
ENSFDAG00000003706	1.10789	0.166322	-0.117403	-0.202066	-0.0976043	0.190297	0.0902261	0.552569	0.044524	0.00763945	0.106027	0.124256	0.155222	0.153333	0.13612	0.430563	0.179199	0.534888	0.781863	0.629089	0.817768	0.999752	0.627904
ENSFDAG00000003718	-0.0972891	-0.0212577	0.0144969	-0.135528	-0.0183165	0.0160599	0.187859	0.0782474	0.0121577	0.00100948	0.0182762	0.0229835	0.0262024	0.0264476	0.727991	0.847121	0.648193	0.316099	0.903835	0.920969	0.248028	0.999752	0.407943
ENSFDAG00000003720	-0.340373	-0.0729504	0.0429852	0.0362514	0.0417511	-0.0741564	-0.095184	0.0227233	0.00555466	0.000270404	0.00649704	0.00849795	0.00918006	0.00943238	0.0239473	0.327673	0.00894779	0.652894	0.650614	0.438947	0.327056	0.999752	0.444112
ENSFDAG00000003721	0.164662	-0.0196353	0.00878886	-0.378322	-0.167425	-0.231823	-0.204788	0.0895671	0.00619718	0.0012508	0.0166479	0.0192096	0.0244852	0.024077	0.582184	0.803031	0.803742	0.00336651	0.227053	0.138471	0.186907	0.999752	0.37727
ENSFDAG00000003729	0.210365	-0.499422	0.00790606	0.268971	0.488428	1.37521	0.871055	2.29034	0.271758	0.0305863	0.487292	0.595319	0.704573	0.704771	0.889448	0.33805	0.963943	0.700007	0.526712	0.10135	0.299465	0.999752	0.433345
ENSFDAG00000003732	-0.360101	-0.121967	0.0697211	-0.389542	-0.498992	-0.238793	0.204425	0.195875	0.0246565	0.00259826	0.042468	0.0522177	0.0612877	0.0614259	0.415849	0.437311	0.171374	0.058722	0.0289873	0.334758	0.409474	0.999752	0.479857
ENSFDAG00000003733	0.738472	-0.11378	-0.0756296	-0.0794704	-0.0528776	-0.196979	0.244881	1.02913	0.221586	0.0125552	0.276317	0.358348	0.392315	0.400648	0.466648	0.809005	0.499699	0.879832	0.929613	0.753151	0.698847	0.999752	0.587823
ENSFDAG00000003737	-0.846337	0.172135	0.0956752	0.143037	-0.156621	-0.226763	-0.49543	0.12264	0.0320686	0.00144051	0.036339	0.0476659	0.0511588	0.0527948	0.0156607	0.336435	0.0117083	0.453047	0.473142	0.31607	0.0310687	0.999752	0.258813
ENSFDAG00000003743	0.670366	-0.174422	-0.0956149	0.554906	0.14534	0.310858	-0.290512	0.554204	0.0829686	0.00718834	0.127647	0.159901	0.183214	0.184697	0.367861	0.54482	0.259428	0.120387	0.71626	0.467689	0.499054	0.999752	0.512163
ENSFDAG00000003744	0.570324	0.123249	-0.0780376	0.1638	0.22245	-0.405271	0.253692	0.892412	0.237704	0.0104462	0.267112	0.350542	0.375582	0.388145	0.546027	0.800429	0.445148	0.751295	0.707126	0.508425	0.68386	0.999752	0.581927
ENSFDAG00000003756	-0.0552685	0.0106961	0.00962315	-0.187776	0.0197378	0.000846521	0.220425	0.0679175	0.00953637	0.000888703	0.0152833	0.0190151	0.0219799	0.0221103	0.83205	0.912782	0.746844	0.128786	0.886182	0.995444	0.138235	0.999752	0.347132
ENSFDAG00000003758	-0.0550561	-0.173732	0.01446	0.0983437	0.136877	0.134105	0.198184	0.126894	0.0133337	0.00171596	0.0260401	0.0313945	0.0378	0.0376586	0.877172	0.132442	0.727036	0.542238	0.439812	0.490344	0.307131	0.999752	0.436824
ENSFDAG00000003761	0.053587	-0.0099298	-0.00788689	-0.224727	0.212352	0.132538	0.380108	0.127808	0.0266594	0.00156871	0.0338078	0.0437319	0.0480486	0.0490063	0.880849	0.951506	0.842162	0.221627	0.309893	0.545415	0.085971	0.999752	0.310129
ENSFDAG00000003767	0.415203	0.192019	-0.0689758	-0.384231	0.160431	0.929754	0.59837	0.781823	0.192459	0.00929079	0.224352	0.293553	0.316896	0.325738	0.638658	0.661606	0.474238	0.417251	0.76715	0.0986127	0.294445	0.999752	0.431232
ENSFDAG00000003771	-0.964845	-0.0491385	0.0526267	0.0314947	0.114382	0.466777	0.0401848	1.66782	0.0367563	0.024251	0.276886	0.292852	0.417026	0.400659	0.454999	0.797716	0.735407	0.952273	0.832602	0.469793	0.94938	0.999752	0.663935
ENSFDAG00000003772	0.0172902	-0.325851	0.0185832	0.0280545	-0.0149221	0.0216597	0.329516	0.145114	0.0258483	0.00183225	0.0357987	0.0456461	0.0511168	0.0518357	0.963798	0.0426864	0.664188	0.882126	0.944318	0.923678	0.14781	0.999752	0.352119
ENSFDAG00000003773	-0.128428	-0.142858	-0.00434036	0.317819	0.156544	-0.00667074	0.0347679	0.234163	0.0235858	0.00317917	0.0474912	0.0569942	0.0690334	0.0686799	0.790701	0.352265	0.938641	0.144734	0.512002	0.979745	0.894456	0.999752	0.648935
ENSFDAG00000003774	0.287435	-0.0929246	-0.0205373	-0.282227	0.00534721	-0.110118	0.0202088	0.0896636	0.0206397	0.00107971	0.024868	0.0324088	0.0352255	0.0360806	0.3371	0.517753	0.53196	0.0735032	0.976304	0.557392	0.915272	0.999752	0.654944
ENSFDAG00000003783	0.365296	0.0820092	-0.0366976	-0.0248282	-0.0207335	-0.170678	-0.295155	0.0511752	0.00657639	0.000677164	0.0111711	0.0137666	0.0161109	0.0161584	0.106357	0.311886	0.158471	0.814281	0.859737	0.17873	0.0202362	0.999752	0.253078
ENSFDAG00000003785	-0.193592	0.0448585	0.0237655	-0.0571988	-0.155707	0.0621337	0.110411	0.0477283	0.00675119	0.000623914	0.0107684	0.0134083	0.0154832	0.0155788	0.375545	0.585099	0.341377	0.581494	0.178725	0.617539	0.376374	0.999752	0.465894
ENSFDAG00000003787	0.43734	0.100499	-0.0529037	-0.0769091	0.0174187	-0.156381	-0.0806115	0.0848013	0.0147805	0.0010746	0.0207317	0.0263782	0.0296215	0.0300156	0.133144	0.408442	0.10656	0.593241	0.914591	0.363554	0.641724	0.999752	0.566803
ENSFDAG00000003797	0.109288	0.100387	-0.0188746	-0.0238293	0.106322	0.00236489	-0.0574527	0.0683597	0.0182084	0.000800188	0.0204611	0.0268519	0.02877	0.0297323	0.675951	0.456908	0.504619	0.867693	0.516445	0.988876	0.738989	0.999752	0.601154
ENSFDAG00000003799	0.12578	0.0360249	-0.00906588	-0.13445	-0.0305606	0.0103764	0.0593935	0.0488939	0.00621064	0.000647877	0.0106322	0.013086	0.0153395	0.0153787	0.56947	0.647581	0.721709	0.192263	0.789352	0.933231	0.631983	0.999752	0.562415
ENSFDAG00000003801	1.0729	-0.182025	-0.0987208	-0.147973	-0.0614716	-0.151906	-0.686449	0.358745	0.0539891	0.00464966	0.0827892	0.103766	0.11881	0.119793	0.0732459	0.433397	0.147682	0.607059	0.848658	0.659426	0.0473314	0.999752	0.277021
ENSFDAG00000003804	0.402267	-0.0481516	-0.047498	0.138139	-0.0552358	-0.0772144	-0.268012	0.176329	0.0295426	0.00224876	0.0424193	0.0537597	0.0606792	0.0614035	0.338077	0.779364	0.316527	0.502404	0.811705	0.753933	0.27944	0.999752	0.424518
ENSFDAG00000003807	2.9909	-0.677394	-0.271097	1.15119	-0.254979	1.10124	0.543361	4.3582	0.305255	0.0608164	0.811994	0.938083	1.19382	1.17434	0.15195	0.220178	0.271639	0.201417	0.792351	0.313509	0.616084	0.999752	0.556906
ENSFDAG00000003809	1.71195	-1.14266	-0.131	-0.473716	-0.476796	0.258783	0.833714	0.378656	0.0848542	0.00458378	0.103642	0.134817	0.146952	0.150332	0.00540117	8.75806e-05	0.0530025	0.141164	0.194096	0.499631	0.0315345	0.999752	0.258813
ENSFDAG00000003815	0.0356609	0.11574	-0.0111164	0.0160142	0.112889	-0.0165538	0.24405	0.120874	0.0173255	0.00157728	0.027401	0.0341666	0.0393818	0.0396427	0.918303	0.379234	0.77955	0.92293	0.541376	0.933521	0.220298	0.999752	0.3941
ENSFDAG00000003816	0.323602	0.188597	-0.0472795	0.00302266	0.0145401	0.203714	0.13783	0.0743487	0.00766009	0.00100729	0.0151732	0.0182541	0.0220396	0.021943	0.23531	0.031173	0.136306	0.980423	0.914298	0.169999	0.352135	0.999752	0.453921
ENSFDAG00000003818	1.98964	-0.108103	-0.207702	-0.362571	-0.256536	1.02068	0.211534	0.82857	0.145784	0.0104833	0.203357	0.258983	0.290476	0.294436	0.0288306	0.777078	0.0425012	0.421389	0.614194	0.0582509	0.696656	0.999752	0.587269
ENSFDAG00000003819	0.872495	0.113225	-0.0811089	-0.28615	-0.00966275	-0.0232171	-0.171692	0.438316	0.0263379	0.00616971	0.0794225	0.0903976	0.117285	0.114873	0.187551	0.485381	0.301786	0.309932	0.974362	0.94595	0.612456	0.999752	0.555446
ENSFDAG00000003824	0.266183	-0.267341	-0.0114401	-0.251039	-0.167387	-0.175308	0.00930998	0.363545	0.0482548	0.0047915	0.0802261	0.0992128	0.115583	0.116049	0.658873	0.2236	0.868731	0.375454	0.595127	0.606099	0.978197	0.999752	0.670647
ENSFDAG00000003827	1.64322	-0.00453261	-0.172429	-0.169435	-0.26474	-0.205785	-0.604637	0.957291	0.134528	0.0125248	0.215482	0.268121	0.30989	0.311737	0.0930597	0.99014	0.123382	0.715108	0.609158	0.711631	0.278839	0.999752	0.424517
ENSFDAG00000003829	1.011	-0.379972	-0.0546072	-0.811256	-1.40086	0.327545	0.933288	0.851708	0.0781462	0.0116579	0.168558	0.200266	0.245755	0.24376	0.273305	0.174069	0.613028	0.048157	0.00174604	0.50879	0.0587154	0.999752	0.286474
ENSFDAG00000003831	-0.298127	0.252846	-0.00404372	0.522946	0.486425	0.263472	-0.413677	0.19251	0.0221946	0.0025789	0.0405967	0.0494413	0.0587533	0.0587135	0.496835	0.0896588	0.936533	0.00944695	0.0286975	0.27705	0.0877793	0.999752	0.311536
ENSFDAG00000003835	0.327902	-0.0332212	-0.0358253	-0.0902648	0.049971	-0.225428	-0.176851	0.0761192	0.01217	0.000977839	0.017976	0.0226731	0.0257499	0.0260159	0.234639	0.763307	0.251936	0.500792	0.739991	0.160074	0.272882	0.999752	0.42162
ENSFDAG00000003838	0.0998823	0.282071	-0.0322102	0.0905819	-0.0251421	0.0840835	-0.0515955	0.252275	0.0397328	0.0032481	0.059231	0.0745921	0.0848842	0.0857177	0.842371	0.157043	0.571958	0.70975	0.926653	0.772887	0.860114	0.999752	0.638951
ENSFDAG00000003839	0.914835	-0.351201	-0.107533	0.971585	0.0189933	0.204043	-0.35546	0.403018	0.107349	0.00471754	0.120629	0.158307	0.169615	0.175288	0.149569	0.283761	0.117439	0.0051516	0.961926	0.62029	0.395875	0.999752	0.474368
ENSFDAG00000003843	0.194749	-0.119622	-0.0145812	0.148943	-0.0490917	-0.0500808	-0.157348	0.139445	0.0371428	0.00163228	0.041738	0.0547745	0.0586871	0.0606501	0.602002	0.534804	0.718168	0.465975	0.833856	0.836222	0.522877	0.999752	0.521653
ENSFDAG00000003849	0.418014	-0.0116747	-0.0551918	0.125281	0.197955	-0.0893008	0.338017	0.0889022	0.00884897	0.00120831	0.0179725	0.0215411	0.0261349	0.025991	0.160928	0.90123	0.11234	0.350042	0.177415	0.580682	0.0360242	0.999752	0.267447
ENSFDAG00000003851	-1.78699	0.424462	0.172078	-0.30885	0.547618	-0.209306	-0.438974	0.649264	0.0890442	0.00852182	0.1449	0.179825	0.208543	0.209614	0.0265726	0.154897	0.0623142	0.417158	0.196574	0.64671	0.337659	0.999752	0.449335
ENSFDAG00000003852	-0.274162	-0.0853192	0.0514752	-0.573202	0.161067	-0.769142	-0.334828	0.988074	0.231039	0.0118614	0.276192	0.360313	0.390989	0.400787	0.782693	0.859114	0.636471	0.275409	0.788446	0.218677	0.596883	0.999752	0.550014
ENSFDAG00000003858	-0.366377	0.0923112	0.0338665	0.0148783	0.171079	0.0823255	-0.123664	0.075549	0.013093	0.000958252	0.0184264	0.0234317	0.0263321	0.0266772	0.182548	0.419815	0.273941	0.912722	0.263729	0.611922	0.44897	0.999752	0.494712
ENSFDAG00000003859	0.0700605	0.065849	-0.0109899	-0.0719283	0.01319	0.0947684	0.133397	0.069667	0.0114794	0.00089081	0.0166485	0.0210638	0.0238268	0.0240976	0.790674	0.538821	0.712712	0.577215	0.927586	0.539251	0.390158	0.999752	0.47132
ENSFDAG00000003862	-0.266722	0.00417741	0.029896	-0.0212612	0.00656897	-0.098993	0.0910674	0.0799354	0.0155974	0.00099334	0.020512	0.0263798	0.0292109	0.0297178	0.345484	0.973317	0.342845	0.881987	0.967739	0.562451	0.597313	0.999752	0.550014
ENSFDAG00000003864	-0.0935733	-0.105532	0.0433249	-0.554181	-0.00700844	-0.280787	0.259246	0.343635	0.0367872	0.00463851	0.0708934	0.0856439	0.102847	0.102525	0.873176	0.582171	0.524689	0.0374004	0.980894	0.381275	0.418143	0.999752	0.482726
ENSFDAG00000003867	0.450931	-0.065419	-0.0460565	0.170526	-0.0737091	-0.0384568	-0.40335	0.38173	0.0538566	0.00499177	0.0860462	0.107111	0.12373	0.124484	0.465484	0.778025	0.514482	0.561015	0.821809	0.912942	0.252952	0.999752	0.410709
ENSFDAG00000003871	0.206953	0.0973756	-0.0212131	-0.000921758	-0.0709401	-0.402023	-0.6746	0.148189	0.0223956	0.00191951	0.0342521	0.0429495	0.0491483	0.049562	0.59085	0.515252	0.628257	0.996026	0.732122	0.0697683	0.00244387	0.999752	0.204207
ENSFDAG00000003874	3.94071	-0.730009	-0.310426	-0.319843	-1.21448	-0.29642	-0.352276	3.58288	0.457147	0.0474502	0.780264	0.960805	1.12555	1.1286	0.0373523	0.280279	0.154135	0.717285	0.215342	0.779938	0.740192	0.999752	0.601154
ENSFDAG00000003876	0.303507	-0.158826	-0.0369395	-0.0253953	0.333915	0.0685245	0.296943	0.0978177	0.0197949	0.00120746	0.0255162	0.0329216	0.036298	0.036978	0.331838	0.258951	0.287758	0.873684	0.0657197	0.719094	0.122542	0.999752	0.337414
ENSFDAG00000003880	-1.7931	0.753759	0.140719	0.624651	0.727019	-0.128976	-0.298092	0.745249	0.0436738	0.0105035	0.134481	0.152705	0.198727	0.19451	0.037794	0.000309998	0.169738	0.0885002	0.062821	0.772336	0.499107	0.999752	0.512163
ENSFDAG00000003882	-0.222073	0.131519	0.00790643	0.0960306	0.197805	-0.264896	-0.632564	0.331207	0.0301506	0.00453639	0.0654184	0.0776587	0.095403	0.0946044	0.69959	0.448795	0.906552	0.707321	0.477823	0.391103	0.039725	0.999752	0.270218
ENSFDAG00000003887	0.302736	0.083921	-0.0494448	0.409981	-0.182714	0.139938	-0.293181	0.247389	0.0456635	0.00310467	0.0619583	0.0792729	0.088378	0.0897326	0.54275	0.694524	0.374871	0.0995423	0.516371	0.637839	0.327716	0.999752	0.444197
ENSFDAG00000003889	1.1699	-1.44116	-0.00462032	-0.327467	-1.25759	0.461352	1.10871	2.18012	0.100992	0.0310516	0.380436	0.423071	0.565566	0.550323	0.428166	5.76288e-06	0.979082	0.595476	0.0531818	0.539569	0.135035	0.999752	0.344812
ENSFDAG00000003895	-0.12063	0.0851919	0.00808005	-0.0642827	0.0916954	0.00297667	0.13118	0.0792336	0.0149804	0.000990194	0.0200512	0.0257126	0.0285812	0.0290439	0.668253	0.486401	0.797352	0.649852	0.56743	0.985952	0.441459	0.999752	0.492047
ENSFDAG00000003897	-0.477643	0.14918	0.0435756	-0.139826	0.172735	0.756118	-0.351915	0.48658	0.128036	0.00570857	0.144671	0.1898	0.203588	0.210198	0.493507	0.676744	0.564116	0.713159	0.691743	0.093784	0.442737	0.999752	0.492575
ENSFDAG00000003899	0.859241	0.167974	-0.0856291	-0.646163	-0.807036	0.398956	-0.335926	0.844136	0.184975	0.0102633	0.228557	0.296812	0.324316	0.33145	0.349681	0.696125	0.39798	0.176507	0.138518	0.483582	0.559562	0.999752	0.536767
ENSFDAG00000003901	-0.305498	0.0642843	0.0280222	-0.0286207	0.187614	-0.0737657	0.104733	0.0917848	0.0240428	0.00107773	0.0272225	0.0357098	0.0383201	0.0395508	0.313274	0.678447	0.393336	0.862285	0.320797	0.706303	0.598451	0.999752	0.550253
ENSFDAG00000003904	0.119576	-0.498377	-0.0101393	0.353973	0.0445634	-0.0553917	0.19974	0.219626	0.0222613	0.00298007	0.0446197	0.0535845	0.064846	0.0645272	0.798604	0.000836931	0.852652	0.0937892	0.847341	0.827802	0.431685	0.999752	0.486729
ENSFDAG00000003906	-0.0680633	0.170902	-0.00632063	0.0346879	0.0242058	0.140918	0.233877	0.0540044	0.00923655	0.000686457	0.0131007	0.0166375	0.0187287	0.0189656	0.769609	0.0753628	0.809367	0.761843	0.851142	0.303148	0.0894578	0.999752	0.311724
ENSFDAG00000003907	1.13933	0.253441	-0.106565	0.0019104	0.132755	-1.31008	-0.834106	0.669324	0.138188	0.0082312	0.176209	0.227739	0.250513	0.255403	0.163737	0.49538	0.240161	0.996369	0.780871	0.00885818	0.0988466	0.999752	0.320296
ENSFDAG00000003913	0.657827	-0.0798926	-0.0655562	-0.024321	-0.17286	-0.0322991	-0.259137	0.0667064	0.0118631	0.000842478	0.0164451	0.0209654	0.0234829	0.0238119	0.0108656	0.463245	0.0239098	0.84958	0.232544	0.833065	0.0930899	0.999752	0.31314
ENSFDAG00000003914	-0.117309	-0.0307237	0.0140714	0.344613	-0.0111524	-0.0339921	-0.502257	0.27195	0.0715544	0.00319057	0.0808537	0.106075	0.113782	0.117475	0.822018	0.908559	0.803271	0.225534	0.972684	0.919731	0.142814	0.999752	0.349653
ENSFDAG00000003915	-0.31824	0.230652	0.0203045	0.067639	0.214673	-0.0418283	0.0206227	0.0994831	0.0210247	0.00121801	0.0264769	0.0342859	0.0376142	0.0383839	0.312987	0.111674	0.560708	0.677641	0.246308	0.829243	0.916168	0.999752	0.655013
ENSFDAG00000003916	0.283518	0.0360551	-0.0242258	-0.190317	-0.273594	0.0390354	-0.235734	0.0861542	0.0229482	0.00100848	0.0257872	0.0338416	0.036259	0.0374718	0.334083	0.811875	0.445548	0.235957	0.136952	0.837573	0.223306	0.999752	0.395382
ENSFDAG00000003919	1.0869	-0.302717	-0.112921	0.493564	-0.321066	-0.154439	-0.593612	1.04955	0.22275	0.0128397	0.279887	0.36256	0.397566	0.405771	0.288719	0.521263	0.318985	0.350853	0.593883	0.806506	0.351396	0.999752	0.453532
ENSFDAG00000003921	-0.0391185	0.140114	-0.00218676	-0.0157989	-0.0851027	-0.158115	-0.0334857	0.0636873	0.00924924	0.000829567	0.014506	0.018113	0.0208402	0.0209875	0.876814	0.145146	0.93948	0.895636	0.527167	0.273396	0.817205	0.999752	0.627809
ENSFDAG00000003923	0.785354	-0.0873783	-0.0727026	-0.234426	-0.10044	-0.0239796	0.161979	0.145865	0.024412	0.00186057	0.0350753	0.0444475	0.0501756	0.0507726	0.0397524	0.575995	0.0918938	0.210674	0.63378	0.914748	0.472227	0.999752	0.503431
ENSFDAG00000003924	0.729571	-0.12823	-0.0886064	0.165708	0.112544	0.200925	0.0158917	0.139835	0.0255802	0.00175762	0.0348872	0.0445984	0.0497765	0.0505235	0.051056	0.422698	0.0345578	0.374984	0.594088	0.367811	0.943636	0.999752	0.662199
ENSFDAG00000003928	0.174668	-0.0809673	-0.0082494	0.0631765	-0.112243	-0.130595	-0.391005	0.184325	0.0349991	0.00230179	0.0467333	0.0599523	0.0666059	0.0676948	0.684127	0.665165	0.863481	0.770102	0.646657	0.61284	0.132888	0.999752	0.344256
ENSFDAG00000003930	0.449908	0.0652643	-0.0503377	-0.450686	-0.223822	0.965481	0.349426	0.687171	0.118454	0.00872361	0.167233	0.212547	0.23902	0.242108	0.587309	0.849601	0.589924	0.270426	0.627333	0.048289	0.477611	0.999752	0.504606
ENSFDAG00000003931	0.129184	0.00481085	-0.0197663	0.635789	-0.120322	-0.089716	-0.524529	0.186892	0.049781	0.00218768	0.0559397	0.073412	0.0786559	0.0812868	0.765075	0.982797	0.672585	0.00718502	0.656984	0.74905	0.0658044	0.999752	0.294209
ENSFDAG00000003933	0.0994522	-0.0935601	-0.0284566	0.0964205	0.175738	-0.125762	0.183498	0.138542	0.00869451	0.0019456	0.0252912	0.0289056	0.0373027	0.0365792	0.789321	0.315675	0.518833	0.544319	0.301298	0.514951	0.337341	0.999752	0.449283
ENSFDAG00000003935	-0.598937	0.167883	0.0455231	0.416948	0.151384	0.0131139	0.305853	0.0978194	0.0175429	0.00123368	0.0242005	0.0308779	0.0345489	0.0350431	0.0554925	0.204969	0.194949	0.00735754	0.388961	0.943754	0.102291	0.999752	0.321054
ENSFDAG00000003940	-0.129609	0.00306689	0.0170575	-0.176141	-0.0369805	0.0544802	0.122496	0.0231699	0.00617159	0.000271217	0.00693511	0.00910123	0.00975135	0.0100775	0.394506	0.968859	0.300318	0.03442	0.698287	0.581151	0.222375	0.999752	0.394975
ENSFDAG00000003950	0.485715	-0.276401	-0.0286411	-0.251757	-0.135883	-0.172303	-0.168666	0.113156	0.0259332	0.00136377	0.0313152	0.0407989	0.0443653	0.0454328	0.148761	0.0860943	0.438004	0.154832	0.501119	0.413338	0.428766	0.999752	0.485611
ENSFDAG00000003954	0.142312	0.0874241	-0.0224031	-0.0975027	-0.00164135	0.242912	0.186756	0.0416956	0.00707104	0.000530724	0.0100799	0.0127903	0.0144138	0.0145918	0.485839	0.2985	0.330821	0.331471	0.988421	0.0430424	0.122095	0.999752	0.33666
ENSFDAG00000003958	0.0235444	-0.100396	0.0100406	-0.155382	-0.0147832	-0.241272	-0.0843952	0.0809075	0.0149428	0.00101527	0.0202683	0.0259338	0.0289104	0.0293541	0.934031	0.411478	0.752675	0.275089	0.926858	0.155901	0.622304	0.999752	0.55892
ENSFDAG00000003960	0.794304	-0.311954	-0.0685582	-0.0501366	-0.412563	0.546935	0.90598	0.184459	0.0215061	0.00246807	0.0390326	0.0475946	0.0564692	0.056452	0.0643965	0.0334029	0.167585	0.799673	0.0586125	0.0213577	0.000137232	0.999752	0.179077
ENSFDAG00000003968	0.000732743	0.238141	-0.00699092	-0.0983184	0.206138	-0.453569	-0.446243	0.136829	0.0148121	0.00184492	0.0283192	0.034253	0.0410686	0.0409552	0.998419	0.0503811	0.870708	0.559056	0.265364	0.0252115	0.027451	0.999752	0.256733
ENSFDAG00000003969	0.36233	-0.0634443	-0.0383728	0.239031	-0.136576	0.083611	-0.352343	0.197793	0.0526844	0.00231527	0.0592023	0.0776936	0.0832434	0.0860277	0.415243	0.782234	0.425169	0.325907	0.624146	0.771974	0.22964	0.999752	0.397505
ENSFDAG00000003971	-0.429631	-0.141422	0.0534239	0.150056	-0.100588	-0.103805	0.335611	0.10418	0.0277496	0.00121949	0.0311827	0.0409223	0.0438455	0.045312	0.183164	0.395903	0.126055	0.395459	0.619018	0.620076	0.114881	0.999752	0.329394
ENSFDAG00000003972	0.309918	0.0136728	-0.0273382	0.018274	-0.0537651	-0.16492	-0.562868	0.148965	0.0250518	0.00189865	0.0358906	0.0455029	0.0513345	0.0519538	0.421987	0.931161	0.530394	0.923156	0.801005	0.466677	0.0135325	0.999752	0.234484
ENSFDAG00000003973	-0.0579469	0.245525	0.00210032	-0.0831183	-0.0292624	-0.0216301	0.033752	0.085242	0.0114282	0.00112208	0.0188753	0.0233676	0.0271852	0.0273041	0.842674	0.0216352	0.950005	0.545184	0.848191	0.895627	0.838149	0.999752	0.633179
ENSFDAG00000003974	0.751315	0.0686236	-0.130559	0.79501	0.384934	0.433816	-0.471368	1.04753	0.160668	0.0135399	0.243471	0.305768	0.3492	0.352314	0.462904	0.864065	0.261857	0.107137	0.486347	0.462874	0.427116	0.999752	0.485526
ENSFDAG00000003975	2.8173	-1.71667	-0.214254	0.747492	0.124107	0.518159	1.08949	3.69527	0.336404	0.0506122	0.729879	0.86645	1.06442	1.05551	0.142762	0.00307876	0.340914	0.381604	0.893933	0.615502	0.288938	0.999752	0.428939
ENSFDAG00000003976	0.666022	-0.136342	-0.0957965	0.387264	0.0670375	0.255594	-0.00184415	0.632602	0.0849333	0.0083257	0.140147	0.173529	0.201838	0.20273	0.402378	0.639903	0.293774	0.30092	0.87215	0.569413	0.996732	0.999752	0.675072
ENSFDAG00000003982	-0.302311	0.201813	0.0251164	0.00708669	-0.100184	0.10357	-0.318582	0.282096	0.0356249	0.00374054	0.0612264	0.075309	0.0883497	0.0885585	0.56923	0.284964	0.681316	0.977152	0.71506	0.727508	0.284374	0.999752	0.426075
ENSFDAG00000003984	-4.02974	1.24521	0.478811	-0.993853	-1.69482	-0.177438	-0.000505121	1.15969	0.212546	0.0145717	0.289563	0.370233	0.413122	0.419349	0.000182556	0.0069143	7.29336e-05	0.0647573	0.0053464	0.7825	0.999378	0.999752	0.67531
ENSFDAG00000003985	0.268096	0.0384416	-0.0222065	-0.187334	-0.131595	0.018574	0.179364	0.042786	0.00517583	0.000570154	0.00915859	0.0112126	0.0132341	0.0132464	0.19494	0.593112	0.35237	0.0502891	0.213958	0.871733	0.119132	0.999752	0.334619
ENSFDAG00000003987	-1.02402	-0.164359	0.116124	-0.0103877	0.400515	-0.0970758	-0.403747	0.301245	0.0463752	0.00389166	0.0701146	0.0880888	0.100551	0.10146	0.0620779	0.445332	0.0626778	0.968707	0.177191	0.759499	0.204963	0.999752	0.387392
ENSFDAG00000003988	-0.246959	-0.103029	0.0393331	-0.249542	0.0361202	-0.357209	0.130662	0.178035	0.0351518	0.00220765	0.0459267	0.0591276	0.0653811	0.0665445	0.558352	0.582647	0.402519	0.244252	0.881913	0.162414	0.612494	0.999752	0.555446
ENSFDAG00000003989	0.0104365	-0.104081	-0.000996354	0.0370454	-0.032436	-0.121412	0.195055	0.275064	0.0521892	0.00343537	0.0697161	0.0894297	0.0993639	0.100986	0.984124	0.648678	0.986437	0.88842	0.913627	0.700114	0.539347	0.999752	0.529053
ENSFDAG00000003992	-0.108304	0.123289	-0.0123445	0.00439206	0.631013	0.261516	0.511162	0.204827	0.0418799	0.00252352	0.0536831	0.0693247	0.0763429	0.0778039	0.81087	0.546875	0.805885	0.984876	0.0165482	0.343902	0.0668683	0.999752	0.294209
ENSFDAG00000004001	0.373239	-0.426835	-0.0213693	0.0464107	-0.0288623	-0.0392364	-0.162842	0.310758	0.0791706	0.00366829	0.0908	0.118993	0.128028	0.131882	0.503152	0.129274	0.72422	0.877595	0.933319	0.912681	0.653858	0.999752	0.571953
ENSFDAG00000004002	0.694357	-0.248803	-0.0707984	0.233892	0.068575	-0.0785978	-0.268234	0.146174	0.0219837	0.00189473	0.0337249	0.0422668	0.0483991	0.0487984	0.0693502	0.0933374	0.103847	0.202798	0.738716	0.720892	0.22465	0.999752	0.395934
ENSFDAG00000004010	0.405627	-0.0545519	-0.0309959	-0.211284	-0.0481209	-0.0306199	0.0494334	0.0518785	0.00442082	0.000714277	0.0100835	0.0118867	0.0147363	0.0145824	0.0749328	0.411953	0.246144	0.0353724	0.658944	0.800857	0.682275	0.999752	0.581911
ENSFDAG00000004015	-0.281291	-0.087026	0.035546	-0.0429985	0.0396365	-0.0775496	0.255556	0.051303	0.0136651	0.000600529	0.0153557	0.020152	0.0215915	0.0223137	0.214276	0.456598	0.146913	0.728598	0.780081	0.597664	0.0871169	0.999752	0.31133
ENSFDAG00000004016	0.969036	-0.512471	-0.059073	-0.385625	-0.19615	-0.582684	-0.607971	0.112984	0.0254786	0.00136603	0.0310198	0.0403686	0.0439727	0.044997	0.00394009	0.00132473	0.109976	0.0285604	0.328935	0.00545774	0.00415566	0.999752	0.204207
ENSFDAG00000004017	0.637485	-0.0680951	-0.05185	-0.406355	-0.22622	-0.366776	-0.106584	0.087018	0.0231783	0.00101859	0.0260458	0.034181	0.0366226	0.0378475	0.0306912	0.654676	0.104246	0.0118061	0.221104	0.0552914	0.583785	0.999752	0.545546
ENSFDAG00000004018	-0.479543	-0.337728	0.0783623	0.246985	-0.570065	-0.343517	0.185857	1.44058	0.285732	0.0178484	0.37238	0.479609	0.530047	0.53957	0.689496	0.52751	0.557504	0.685668	0.410421	0.637044	0.800253	0.999752	0.621541
ENSFDAG00000004020	0.148743	-0.111681	-0.0157332	0.201724	0.284878	-0.23646	-0.55976	0.242965	0.0466101	0.00302852	0.0618791	0.0794577	0.0881657	0.0896402	0.762833	0.604949	0.774961	0.417404	0.312194	0.425824	0.0615384	0.999752	0.289154
ENSFDAG00000004025	2.04067	-1.14236	-0.149789	-1.23078	0.67702	-0.420519	-0.684936	0.72283	0.178305	0.00858626	0.207646	0.271723	0.29327	0.301489	0.0163841	0.00682357	0.105985	0.00691382	0.194016	0.437443	0.212242	0.999752	0.390014
ENSFDAG00000004026	0.17733	-0.525675	-0.0242044	0.216618	0.140398	0.138004	0.0987985	0.245832	0.0258624	0.00332396	0.0504648	0.0608493	0.0732522	0.0729812	0.720602	0.00108019	0.674615	0.334908	0.56925	0.610124	0.714576	0.999752	0.593064
ENSFDAG00000004039	0.673288	0.0966436	-0.0638462	-0.617037	0.253869	-0.00680725	-1.06423	0.259966	0.0441054	0.00330876	0.0628573	0.0797625	0.0898819	0.0909936	0.186663	0.645387	0.267022	0.0138502	0.368707	0.981885	0.000418698	0.999752	0.199774
ENSFDAG00000004040	0.931415	0.0383668	-0.09108	-0.422521	0.0821196	-0.0609341	0.220851	0.475816	0.0366994	0.00659845	0.0904265	0.105495	0.132562	0.130774	0.176926	0.841266	0.262182	0.159998	0.800398	0.867087	0.541388	0.999752	0.529846
ENSFDAG00000004047	-1.36169	1.05283	0.0954428	0.16753	-0.0325866	0.391673	-0.14603	0.23088	0.0614976	0.00270257	0.0691058	0.0906904	0.0971686	0.100419	0.00459845	2.18103e-05	0.0663692	0.523938	0.913831	0.208937	0.644925	0.999752	0.567678
ENSFDAG00000004053	-0.0583267	-0.174634	0.014028	-0.0862873	-0.173008	-0.0992255	-0.220766	1.12643	0.124862	0.015152	0.234758	0.28468	0.340185	0.339511	0.956174	0.621157	0.909268	0.858653	0.745745	0.864913	0.704775	0.999752	0.589939
ENSFDAG00000004056	1.22425	-0.299937	-0.114163	-0.407825	-0.10561	-0.114533	0.251538	0.322099	0.0743291	0.00387673	0.0894441	0.116586	0.126686	0.129776	0.0309957	0.271268	0.0667207	0.172682	0.757093	0.747615	0.485026	0.999752	0.506979
ENSFDAG00000004062	0.575738	-0.0788809	-0.0553253	-0.0491401	-0.131713	-0.0391827	-0.284449	0.0349466	0.00850753	0.000416196	0.0099707	0.0130385	0.0140909	0.0144748	0.00207141	0.392438	0.00668972	0.622633	0.248709	0.741336	0.0180652	0.999752	0.251789
ENSFDAG00000004071	-0.321959	0.0479712	0.0317276	0.0554442	0.161429	-0.0826897	-0.0196325	0.045335	0.0120755	0.000530671	0.0135695	0.0178077	0.0190798	0.019718	0.130505	0.662442	0.168424	0.634099	0.226396	0.549414	0.888808	0.999752	0.647818
ENSFDAG00000004078	0.429765	-0.392587	-0.011796	-0.309314	-0.33223	-0.385257	0.137663	1.17827	0.269616	0.0142051	0.325828	0.424458	0.461638	0.47271	0.692163	0.449606	0.921161	0.587899	0.610092	0.570699	0.841305	0.999752	0.634289
ENSFDAG00000004079	-0.815826	0.104304	0.0911916	-0.327127	-0.00881793	0.0844517	0.257807	0.0795011	0.0173767	0.000967083	0.0214992	0.0279142	0.0305095	0.0311772	0.00381074	0.428794	0.00336354	0.0256793	0.957909	0.628745	0.144269	0.999752	0.350729
ENSFDAG00000004081	-0.0728096	0.131308	0.00382044	0.142803	-0.106541	-0.281385	-0.0609361	0.137358	0.0286713	0.0016857	0.0363457	0.0470175	0.0516544	0.0526853	0.844254	0.438061	0.925863	0.453827	0.623183	0.215688	0.790641	0.999752	0.618171
ENSFDAG00000004086	-0.709863	0.226006	0.0662161	-0.181545	-0.249419	0.638622	0.383509	0.137448	0.036611	0.00160891	0.0411404	0.0539902	0.0578468	0.0597817	0.0555286	0.237534	0.0987766	0.370757	0.28308	0.00792516	0.116758	0.999752	0.331726
ENSFDAG00000004088	1.34903	0.503625	-0.173907	0.158382	-0.768959	0.516556	-0.562856	0.985042	0.262378	0.0115305	0.294838	0.386928	0.414567	0.428433	0.174072	0.325507	0.105329	0.770528	0.216385	0.422397	0.389836	0.999752	0.471058
ENSFDAG00000004091	0.835648	0.296433	-0.0807984	0.711969	0.167437	-0.804765	-0.761528	1.02843	0.157482	0.0132961	0.238885	0.299957	0.342639	0.345675	0.409929	0.455073	0.483482	0.145202	0.759819	0.169182	0.195236	0.999752	0.383401
ENSFDAG00000004092	-0.765891	0.0870888	0.0875885	-0.112521	-0.287932	0.468379	-0.431835	0.756509	0.189742	0.00895717	0.219221	0.287097	0.309361	0.318352	0.378555	0.841534	0.354722	0.81008	0.59101	0.399731	0.444059	0.999752	0.49304
ENSFDAG00000004093	0.307017	-0.0304902	-0.026123	-0.315025	-0.0882079	0.0180051	0.187697	0.106291	0.0134885	0.00140858	0.0231062	0.0284359	0.0333371	0.0334213	0.346344	0.792913	0.486406	0.0382254	0.600914	0.921446	0.30456	0.999752	0.435864
ENSFDAG00000004094	0.766177	-0.135607	-0.0630392	-0.217652	-0.221536	-0.269248	-0.618304	0.139944	0.0372758	0.00163812	0.0418874	0.0549705	0.0588972	0.0608672	0.0405499	0.482445	0.119344	0.287572	0.344717	0.267238	0.0122046	0.999752	0.230215
ENSFDAG00000004095	-2.07971	-1.05688	0.323796	-0.446452	-0.416157	0.180973	0.570727	0.680618	0.0815178	0.00907985	0.145233	0.177611	0.209928	0.210053	0.0117063	0.000214184	0.000678637	0.241398	0.323413	0.692855	0.213031	0.999752	0.390182
ENSFDAG00000004097	-0.642965	-0.0549531	0.0780275	-0.413558	0.100821	0.180534	0.445736	0.160825	0.0428376	0.00188254	0.0481373	0.0631725	0.0676851	0.069949	0.108872	0.790617	0.0721209	0.0594388	0.688324	0.487729	0.0919235	0.999752	0.312538
ENSFDAG00000004100	0.0683893	-0.0929582	-0.0028162	0.0584694	0.176188	0.332246	-0.0594684	0.2445	0.025864	0.00330419	0.0502696	0.0606502	0.0729559	0.0726991	0.889997	0.563253	0.960925	0.794261	0.47435	0.218672	0.825437	0.999752	0.63032
ENSFDAG00000004110	0.146965	0.363483	-0.0312747	0.348396	-0.183504	-0.296629	-0.324077	0.576272	0.153497	0.00674558	0.172487	0.226362	0.242531	0.250643	0.846491	0.353534	0.70336	0.401541	0.699722	0.546959	0.517423	0.999752	0.518729
ENSFDAG00000004114	-0.19456	-0.0825616	0.0311367	-0.199643	0.0910829	-0.205198	-0.0159683	0.107385	0.0175027	0.00137543	0.0255517	0.0322922	0.0365807	0.0369827	0.552699	0.532588	0.401152	0.211685	0.612253	0.283329	0.933824	0.999752	0.659086
ENSFDAG00000004115	0.0280878	0.0667493	-0.00239699	-0.0405217	-0.0365488	-0.0545697	-0.172232	0.0465237	0.0123921	0.000544585	0.0139252	0.0182747	0.01958	0.020235	0.896392	0.548762	0.918189	0.731306	0.78688	0.69655	0.225983	0.999752	0.396209
ENSFDAG00000004117	0.180682	-0.000306476	-0.0173708	0.157098	0.109212	-0.111709	-0.553017	0.12104	0.0165986	0.00158871	0.0270122	0.0335226	0.0388767	0.0390762	0.603524	0.998102	0.662975	0.339146	0.550851	0.571014	0.00514873	0.999752	0.211827
ENSFDAG00000004122	-1.36441	0.201864	0.137882	-0.229752	0.0349358	0.273789	0.469105	0.306488	0.0608309	0.00379684	0.079249	0.102075	0.112801	0.11483	0.0137186	0.413096	0.0252427	0.414423	0.912926	0.414962	0.166256	0.999752	0.364874
ENSFDAG00000004123	-0.697274	0.0567031	0.0710585	-0.225505	0.147384	0.21112	0.60237	0.111222	0.0285068	0.00131138	0.0326024	0.0427355	0.0459539	0.0473562	0.0365482	0.736991	0.0497351	0.211698	0.47588	0.3247	0.00563917	0.999752	0.216495
ENSFDAG00000004129	-1.2948	-0.186477	0.13515	0.0722837	0.564787	-0.192933	-0.487937	0.664158	0.0936841	0.00868523	0.149698	0.186341	0.215259	0.216569	0.112109	0.542363	0.147006	0.851799	0.190748	0.677528	0.294412	0.999752	0.431232
ENSFDAG00000004130	-0.920735	0.351841	0.0997828	-0.27956	0.123667	-0.447725	-0.411986	0.139054	0.025744	0.00174419	0.0348709	0.0446285	0.0497359	0.0505035	0.0135445	0.0283184	0.0168835	0.134373	0.558285	0.0446862	0.0667653	0.999752	0.294209
ENSFDAG00000004135	-0.529886	0.079524	0.0558309	-0.315852	0.416399	0.0949395	0.162497	0.124557	0.0282531	0.00150423	0.0342955	0.04465	0.048606	0.0497515	0.133251	0.636132	0.150004	0.0880915	0.0487691	0.666739	0.466294	0.999752	0.501387
ENSFDAG00000004142	0.187051	0.0743947	-0.0355109	0.342545	-0.045696	0.400275	0.781009	0.339127	0.0510823	0.00439484	0.0782881	0.0981331	0.112347	0.11328	0.748057	0.742035	0.592193	0.220858	0.884023	0.232399	0.0203143	0.999752	0.253078
ENSFDAG00000004148	-0.983984	0.0302802	0.100067	0.0658252	0.0152945	0.241052	0.481383	0.126881	0.0203168	0.00162956	0.0299814	0.0378216	0.0429452	0.0433911	0.00573748	0.831765	0.0131793	0.703827	0.937316	0.244749	0.0208357	0.999752	0.253078
ENSFDAG00000004154	-0.349842	-0.0811922	0.0401152	-0.0799844	0.0144534	0.0875913	-0.149433	0.0577488	0.00586205	0.000783479	0.0117371	0.0140976	0.0170568	0.0169738	0.14545	0.28894	0.151812	0.460341	0.903113	0.502428	0.251389	0.999752	0.410021
ENSFDAG00000004157	1.17362	-0.209955	-0.134933	0.223448	-0.102822	-0.180859	-0.669448	0.652638	0.0657274	0.00886081	0.132358	0.158841	0.192397	0.191411	0.146294	0.412819	0.151729	0.539092	0.796414	0.680101	0.12598	0.999752	0.339448
ENSFDAG00000004161	-0.0320733	0.411417	-0.0189623	0.187531	0.104592	-0.123994	-0.0753458	0.0934091	0.0173107	0.00117145	0.0234344	0.0299947	0.0334232	0.0339403	0.916422	0.0017661	0.579561	0.220564	0.545899	0.497627	0.682555	0.999752	0.581911
ENSFDAG00000004164	-0.303277	0.0163686	0.0412061	-0.00657047	-0.288472	0.11194	-0.0180408	0.0790924	0.0161584	0.000974583	0.0207216	0.0267573	0.0294689	0.0300319	0.280863	0.89754	0.186857	0.963594	0.0778118	0.514348	0.917087	0.999752	0.655013
ENSFDAG00000004165	-0.50519	0.10731	0.047108	0.087472	0.11771	0.186288	-0.0384026	0.04823	0.00894981	0.000604717	0.0121068	0.0154979	0.0172666	0.0175345	0.0214279	0.256663	0.0554081	0.426627	0.344386	0.156281	0.771808	0.999752	0.612939
ENSFDAG00000004166	0.116591	-0.0403836	0.000773034	0.185096	0.416084	-1.08807	-0.553374	0.941023	0.216342	0.0113344	0.260828	0.33989	0.369479	0.378426	0.904333	0.930812	0.994207	0.717034	0.475417	0.073449	0.368357	0.999752	0.462223
ENSFDAG00000004171	1.00269	-0.10644	-0.107828	0.222919	-0.151961	-0.393328	-0.441802	0.741147	0.113237	0.00958512	0.172009	0.215934	0.246734	0.248902	0.244138	0.751769	0.270736	0.590929	0.743654	0.428452	0.37586	0.999752	0.46555
ENSFDAG00000004173	-0.551667	0.164749	0.0487882	-0.0782296	0.101164	0.174654	0.360376	0.0963629	0.0244798	0.00113813	0.0281133	0.0368382	0.039646	0.0408316	0.0755451	0.292351	0.148129	0.640809	0.598137	0.380399	0.0745151	0.999752	0.300477
ENSFDAG00000004178	-0.267703	-0.0563535	0.0259335	-0.129103	0.218904	0.17103	0.476496	0.0677466	0.0172235	0.000800024	0.0197728	0.0259101	0.0278829	0.0287182	0.30371	0.667634	0.359209	0.358554	0.17385	0.305719	0.00492692	0.999752	0.209958
ENSFDAG00000004179	-0.0963463	0.2627	-0.00446908	0.158765	-0.0904818	0.465989	-0.559114	0.228905	0.0608257	0.00268063	0.0684244	0.0897912	0.0962265	0.0994261	0.840404	0.286801	0.931214	0.543889	0.762685	0.133045	0.0762006	0.999752	0.300477
ENSFDAG00000004181	1.51421	-0.509126	-0.173353	0.111774	0.0415699	0.506104	0.0136033	1.84834	0.113164	0.0259915	0.335979	0.383087	0.495889	0.48594	0.265377	0.130164	0.282255	0.847088	0.946452	0.472326	0.984431	0.999752	0.672158
ENSFDAG00000004182	0.204938	-0.0653251	-0.015168	-0.101933	-0.0849583	-0.116246	0.0186417	0.0515343	0.012003	0.000619126	0.0143769	0.018751	0.0203557	0.0208617	0.366652	0.551002	0.542131	0.395257	0.534974	0.415204	0.897306	0.999752	0.649544
ENSFDAG00000004187	0.776134	-0.162071	-0.11133	0.342888	0.304795	0.456254	0.195952	0.240393	0.00731255	0.0034704	0.0403827	0.0435234	0.0605459	0.058428	0.113426	0.0580576	0.0587802	0.0879524	0.144019	0.0637058	0.417561	0.999752	0.482691
ENSFDAG00000004192	-1.34518	0.439129	0.0975733	0.667841	0.184974	0.0678428	-0.751418	0.787552	0.0874465	0.0105917	0.164214	0.199173	0.237948	0.237491	0.129572	0.137549	0.343086	0.0993446	0.678528	0.889387	0.123096	0.999752	0.337471
ENSFDAG00000004194	-1.28804	0.961752	0.0614532	0.674736	0.093773	0.74986	-0.348831	0.925414	0.160159	0.0117404	0.225581	0.286819	0.322378	0.326588	0.180591	0.016253	0.570608	0.155423	0.861005	0.186608	0.541596	0.999752	0.529846
ENSFDAG00000004198	0.547264	0.274048	-0.0729368	0.747769	-0.410508	-0.0791069	0.207646	0.827024	0.0985797	0.0110389	0.176209	0.21538	0.254742	0.254852	0.54732	0.382752	0.487557	0.0748523	0.376403	0.875454	0.680838	0.999752	0.581699
ENSFDAG00000004200	-0.675591	0.113373	0.09142	-0.230994	-0.0689582	0.00318108	0.26314	0.234989	0.0294347	0.0031189	0.0508666	0.0625109	0.0734197	0.0735731	0.163417	0.508733	0.101637	0.305741	0.782695	0.990633	0.331985	0.999752	0.446805
ENSFDAG00000004201	0.0818463	-0.0565507	-0.00845675	0.05554	-0.0175312	0.0527143	-0.0181251	0.0264713	0.00623241	0.000317345	0.00742501	0.00969068	0.0105083	0.0107753	0.614929	0.473791	0.634986	0.519218	0.858654	0.607087	0.861387	0.999752	0.63957
ENSFDAG00000004206	-0.0161878	0.214131	0.0172414	-0.000129581	-0.153389	-0.142364	-0.194734	1.95277	0.024735	0.028642	0.329182	0.34013	0.497803	0.47636	0.990757	0.17335	0.918855	0.99982	0.792543	0.840091	0.777832	0.999752	0.614612
ENSFDAG00000004209	0.29923	-0.110503	-0.0417786	0.233667	0.163293	0.189021	0.118764	0.153201	0.0273029	0.00193418	0.0378019	0.0482027	0.0539763	0.0547364	0.444573	0.503648	0.342133	0.229432	0.457022	0.415877	0.611713	0.999752	0.555112
ENSFDAG00000004211	1.73888	-0.506389	-0.152512	0.124612	0.026764	0.0359998	0.215143	0.396658	0.0204275	0.00562472	0.0701891	0.0787695	0.104074	0.101527	0.0057629	0.000395537	0.0419975	0.638102	0.924028	0.911148	0.499545	0.999752	0.512443
ENSFDAG00000004222	0.19814	-0.0863908	-0.00629929	-0.295225	-0.0705273	-0.0933767	-0.0654831	0.159312	0.0250765	0.00205136	0.0373959	0.0470914	0.0535932	0.0541184	0.619599	0.585376	0.889385	0.126846	0.745179	0.68669	0.778338	0.999752	0.614667
ENSFDAG00000004224	0.0786482	0.124238	-0.00957315	-0.0620552	-0.123275	-0.134404	-0.124416	0.0248436	0.00661739	0.000290808	0.00743607	0.00975866	0.0104557	0.0108055	0.617795	0.126699	0.574543	0.471756	0.212067	0.188703	0.231351	0.999752	0.398563
ENSFDAG00000004227	-0.0530931	-0.0174042	-0.000856392	0.0322967	0.177029	0.138592	0.229362	0.0400201	0.0106598	0.000468457	0.0119786	0.01572	0.016843	0.0174063	0.790702	0.866135	0.968438	0.767925	0.157966	0.285566	0.0821276	0.999752	0.306514
ENSFDAG00000004231	-0.616355	0.0218218	0.0327905	0.562868	0.0212235	1.31418	0.401678	0.772185	0.16242	0.00946275	0.205056	0.265432	0.291355	0.29726	0.483049	0.956818	0.736053	0.213869	0.967141	0.0149045	0.461285	0.999752	0.499686
ENSFDAG00000004235	0.209626	-0.172488	-0.0220877	0.121105	0.19998	0.00641903	-0.522034	0.173751	0.0251499	0.00226425	0.0395274	0.0493387	0.0567932	0.0571882	0.615035	0.276749	0.642518	0.542436	0.367955	0.978511	0.0290388	0.999752	0.258604
ENSFDAG00000004236	-0.141858	0.357161	-0.0303492	0.75765	0.485606	-0.108159	-0.178618	0.848025	0.088283	0.0114779	0.173569	0.209047	0.25203	0.251011	0.877574	0.229341	0.776962	0.0689754	0.288194	0.829421	0.721454	0.999752	0.594658
ENSFDAG00000004238	2.11346	-0.877175	-0.198623	-0.112506	-1.08926	-0.469012	-0.663385	1.20206	0.120734	0.0163243	0.243604	0.29226	0.354136	0.35229	0.0538974	0.0115869	0.120046	0.819687	0.0439189	0.43062	0.263706	0.999752	0.417558
ENSFDAG00000004240	-0.709682	0.109412	0.0921629	-0.260807	-0.314588	-0.0791779	-0.291027	0.218389	0.0581704	0.00255636	0.065367	0.0857837	0.0919114	0.0949857	0.128859	0.650087	0.0683296	0.307684	0.282784	0.793963	0.345023	0.999752	0.451961
ENSFDAG00000004249	0.790175	-0.271718	-0.0835614	0.0135946	0.110545	0.139093	0.171314	0.065778	0.0175207	0.000769967	0.0196883	0.0258378	0.0276834	0.0286094	0.00206348	0.040094	0.00260038	0.922817	0.49163	0.403167	0.31114	0.999752	0.438719
ENSFDAG00000004251	-0.0218268	0.0119012	-0.01731	0.616991	0.424818	0.137729	0.263514	0.210412	0.0239913	0.00282204	0.044223	0.0537926	0.0640244	0.0639575	0.962048	0.938754	0.744539	0.00334666	0.067004	0.586223	0.297423	0.999752	0.433214
ENSFDAG00000004261	1.28404	-0.549693	-0.140381	0.45563	0.18607	0.38261	0.566666	1.67419	0.0733224	0.0238969	0.290216	0.321248	0.432005	0.419827	0.321015	0.0423538	0.363821	0.397682	0.742693	0.560487	0.38181	0.999752	0.467842
ENSFDAG00000004263	-0.333708	0.0196754	0.0343106	-0.0772125	0.148628	-0.0686926	0.293837	0.0885848	0.014375	0.00113539	0.0210417	0.0265805	0.030128	0.0304545	0.262198	0.869649	0.308558	0.594526	0.361963	0.692287	0.0922283	0.999752	0.312538
ENSFDAG00000004264	0.13513	0.0991046	-0.0255001	0.28825	-0.153273	0.0611953	-0.571647	0.345731	0.049251	0.00451519	0.0782008	0.0974455	0.112415	0.113136	0.818234	0.655188	0.704322	0.302647	0.623424	0.855176	0.0892208	0.999752	0.311724
ENSFDAG00000004266	-0.774953	0.250796	0.067581	0.172941	0.17344	0.0243068	0.206638	0.0906893	0.0241562	0.00106157	0.0271447	0.035623	0.0381677	0.0394443	0.0100722	0.106606	0.0380607	0.293866	0.358131	0.900985	0.298135	0.999752	0.433345
ENSFDAG00000004269	0.458738	0.0309455	-0.0406098	0.244918	-0.133913	-0.400345	-1.22554	0.438901	0.0845815	0.00546638	0.112005	0.143883	0.159564	0.162259	0.488662	0.915261	0.582825	0.46428	0.724062	0.316233	0.00234658	0.999752	0.204207
ENSFDAG00000004276	0.600061	-0.266064	-0.0485667	-0.0185575	-0.0470246	-0.231595	-0.355992	0.0405033	0.0107885	0.000474114	0.0121233	0.0159098	0.0170463	0.0176165	0.00286742	0.0104203	0.0257159	0.866156	0.709287	0.0760903	0.00731546	0.999752	0.228594
ENSFDAG00000004280	-0.28544	0.0529601	0.0158998	0.208819	0.270531	0.289858	0.0173859	0.155823	0.0332932	0.00190383	0.0416853	0.0540274	0.0591993	0.0604376	0.469618	0.771625	0.715559	0.306415	0.24447	0.23353	0.943621	0.999752	0.662199
ENSFDAG00000004285	-0.986861	0.117393	0.0913632	0.472434	0.403663	0.217534	-0.352444	0.80526	0.20026	0.00955021	0.232309	0.304117	0.327972	0.337328	0.271448	0.793069	0.34984	0.326995	0.464182	0.704059	0.543967	0.999752	0.530026
ENSFDAG00000004289	0.0831539	0.0071854	-0.014868	-0.367224	0.34007	0.192286	0.484076	0.115386	0.0307345	0.00135066	0.0345369	0.0453241	0.0485617	0.050186	0.806614	0.967307	0.685803	0.0481531	0.110185	0.382896	0.0307078	0.999752	0.258813
ENSFDAG00000004291	0.560553	-0.00679842	-0.0713672	0.424621	0.0730755	0.213852	-0.451981	0.302137	0.0524803	0.00383083	0.0737598	0.093817	0.105399	0.106788	0.307823	0.976325	0.248885	0.117941	0.811433	0.510081	0.16663	0.999752	0.364874
ENSFDAG00000004293	0.906557	-0.318092	-0.0868209	0.505273	0.113611	0.0219165	-0.719685	0.655288	0.0689797	0.00885981	0.134541	0.162237	0.19529	0.194571	0.262757	0.225844	0.356328	0.168351	0.777896	0.960446	0.102772	0.999752	0.321054
ENSFDAG00000004296	-1.5216	0.177543	0.149006	0.213202	0.208302	0.166128	-0.165693	0.33297	0.0416713	0.00441981	0.0720555	0.0885418	0.104006	0.10422	0.00836628	0.384448	0.025006	0.427049	0.483906	0.606464	0.607778	0.999752	0.553611
ENSFDAG00000004300	0.163065	0.136525	-0.0151121	-0.04984	-0.0534607	-0.0482203	0.101497	0.116306	0.0128755	0.00156467	0.0242298	0.0293783	0.0351126	0.0350416	0.632548	0.228908	0.702428	0.748827	0.755113	0.79692	0.58768	0.999752	0.547309
ENSFDAG00000004301	-0.190331	0.145	0.0155855	-0.0990533	0.0510153	0.0814239	0.112902	0.06705	0.00840409	0.000889856	0.0145169	0.0178414	0.020953	0.0209972	0.462317	0.113718	0.601343	0.411013	0.702512	0.57377	0.435891	0.999752	0.489234
ENSFDAG00000004302	0.418169	-0.0707954	-0.0332985	-0.202175	0.0974844	0.0127107	0.242291	0.277044	0.0353082	0.00366957	0.0603108	0.0742565	0.087003	0.0872353	0.426922	0.70635	0.582533	0.410368	0.720538	0.965628	0.412026	0.999752	0.481021
ENSFDAG00000004311	-0.762509	0.0620972	0.0843679	-0.1991	0.109164	0.0683427	0.141422	0.0802014	0.0195781	0.000954644	0.0229149	0.0299698	0.0323799	0.0332673	0.00709209	0.657188	0.00632208	0.188422	0.528317	0.704094	0.438122	0.999752	0.490689
ENSFDAG00000004314	-0.490288	-0.0755015	0.0403464	0.134631	0.407777	0.294152	0.26832	0.346342	0.0543071	0.00446216	0.0811782	0.102184	0.116352	0.117477	0.404786	0.745948	0.545848	0.636552	0.20208	0.388494	0.433718	0.999752	0.487844
ENSFDAG00000004317	1.02156	-0.31765	-0.0917066	0.0564125	-0.276237	-0.0706638	-0.54902	0.374643	0.0922807	0.00445154	0.107541	0.140717	0.151897	0.156141	0.0951181	0.295715	0.169286	0.863419	0.461493	0.856124	0.164709	0.999752	0.363912
ENSFDAG00000004319	1.00688	-0.342032	-0.0814579	0.0183391	0.0808071	0.0248845	-0.711837	0.842757	0.135815	0.0108131	0.19964	0.252011	0.285907	0.288939	0.272732	0.353357	0.433419	0.96726	0.872119	0.962881	0.185412	0.999752	0.376757
ENSFDAG00000004320	0.742758	-0.305462	-0.0726369	0.436605	-0.117468	0.349644	0.0275981	0.381971	0.0370064	0.00520408	0.0766637	0.0916183	0.111579	0.110867	0.229441	0.112312	0.313984	0.114827	0.697953	0.295223	0.933943	0.999752	0.659086
ENSFDAG00000004327	-0.241549	-1.23517	0.13085	-0.532707	-0.270898	0.383516	0.767811	0.792411	0.0645492	0.0109467	0.152422	0.178831	0.223068	0.220428	0.786122	1.16416e-06	0.211066	0.172419	0.521784	0.416783	0.101968	0.999752	0.321054
ENSFDAG00000004329	-0.121187	0.150562	0.00504245	-0.0659507	0.05499	-0.0746285	0.139158	0.163601	0.0201587	0.00217555	0.0352261	0.0432127	0.0508714	0.0509498	0.764472	0.288947	0.91391	0.725297	0.79137	0.740737	0.537561	0.999752	0.528124
ENSFDAG00000004331	0.822162	0.0414527	-0.099103	0.387804	-0.0494666	0.0654868	-0.731366	0.564435	0.0766114	0.00741828	0.125515	0.155594	0.180703	0.181568	0.273808	0.880951	0.249885	0.273682	0.900203	0.877568	0.0860916	0.999752	0.310185
ENSFDAG00000004332	0.330958	0.0807167	-0.0389852	0.118476	-0.0963703	0.109784	-0.581139	0.175874	0.0345128	0.0021833	0.0452449	0.0582178	0.0644222	0.0655537	0.430011	0.663937	0.404089	0.577538	0.689593	0.665353	0.0232216	0.999752	0.255044
ENSFDAG00000004333	0.650623	-0.224551	-0.0585077	-0.0439057	-0.207479	-0.151106	-0.020122	0.0649916	0.0158183	0.000774051	0.0185408	0.0242453	0.0262027	0.0269163	0.010707	0.0741965	0.0354705	0.747115	0.182703	0.350568	0.902385	0.999752	0.650999
ENSFDAG00000004335	1.6676	-0.944312	-0.163673	1.06513	0.167231	-0.0480067	-0.0193087	2.03522	0.178637	0.0279574	0.398392	0.471103	0.581672	0.576134	0.242436	0.0254671	0.327639	0.0915033	0.807505	0.94981	0.979705	0.999752	0.671099
ENSFDAG00000004338	0.362461	-0.168014	-0.0641871	0.891304	0.0294857	0.00864588	-0.00566976	1.21881	0.160404	0.0160809	0.268187	0.331352	0.386485	0.387934	0.742672	0.674846	0.61274	0.0852323	0.959148	0.988904	0.992737	0.999752	0.674505
ENSFDAG00000004341	0.174512	-0.0301406	-0.0218404	-0.0207841	0.0753532	0.0166148	0.224422	0.0469343	0.00289735	0.000659704	0.00854351	0.00974906	0.0126069	0.0123568	0.420514	0.575512	0.395144	0.822088	0.445363	0.882362	0.0434979	0.999752	0.273156
ENSFDAG00000004344	-0.738073	-0.135973	0.0870136	0.329618	0.312137	-0.121722	-0.0295976	0.182998	0.0265067	0.00238452	0.0416414	0.0519813	0.0598293	0.060247	0.084465	0.403623	0.0747634	0.10625	0.170981	0.618739	0.904021	0.999752	0.651118
ENSFDAG00000004346	0.372523	0.0544643	-0.0600346	0.32224	0.0875133	-0.00580235	-0.271404	0.338893	0.0440227	0.00447848	0.0742439	0.0916008	0.107037	0.107392	0.522229	0.795187	0.369671	0.236955	0.772466	0.98585	0.407561	0.999752	0.478961
ENSFDAG00000004349	-0.265778	0.421938	0.00521119	-0.59178	-0.18	-0.325026	-0.64736	1.44372	0.193875	0.0190003	0.319865	0.396064	0.460663	0.462703	0.824939	0.337927	0.969843	0.295399	0.774866	0.632024	0.341255	0.999752	0.450219
ENSFDAG00000004352	0.193411	0.0162426	-0.0143792	-0.208545	-0.0420049	-0.0774044	-0.112333	0.0274785	0.00382075	0.00036002	0.00616211	0.00765869	0.00886484	0.00891448	0.243304	0.792725	0.448553	0.00789198	0.631242	0.411014	0.234142	0.999752	0.399676
ENSFDAG00000004357	0.575865	-0.179967	-0.052026	-0.17021	-0.0847341	-0.0582903	0.0598907	0.112067	0.0298504	0.00131181	0.0335434	0.0440204	0.0471649	0.0487424	0.0853944	0.297579	0.150879	0.352706	0.686316	0.788389	0.786181	0.999752	0.61676
ENSFDAG00000004358	-1.07872	-0.230072	0.129492	-0.0336878	0.570574	-0.613033	-0.821365	0.393939	0.0505253	0.00521394	0.0859379	0.105882	0.123947	0.124304	0.0856739	0.306049	0.0729201	0.908512	0.0795199	0.0816365	0.019824	0.999752	0.253078
ENSFDAG00000004359	0.220281	-0.283166	-0.0125718	0.270192	0.00763149	-0.258212	-0.206316	0.135102	0.0193838	0.00176271	0.0306372	0.0382059	0.0440317	0.0443248	0.548971	0.0419657	0.764606	0.122674	0.968856	0.218497	0.327105	0.999752	0.444112
ENSFDAG00000004362	0.301233	0.00781993	-0.0270145	0.0413205	-0.217038	-0.0704998	-0.598263	0.454087	0.07669	0.00578369	0.109592	0.139003	0.156731	0.158644	0.654856	0.977472	0.722427	0.900668	0.560476	0.858661	0.133089	0.999752	0.344256
ENSFDAG00000004364	0.0169363	0.0193995	-0.00392398	0.0518496	0.110462	-0.179194	0.02532	0.0659412	0.0101831	0.000851481	0.015366	0.0193114	0.0220342	0.0222358	0.947415	0.847552	0.893028	0.675744	0.426681	0.22736	0.865167	0.999752	0.640951
ENSFDAG00000004367	0.158857	0.648877	-0.0268137	0.0651263	-0.446894	-0.677349	-1.18438	1.11242	0.284335	0.0131231	0.325604	0.426759	0.459018	0.472937	0.880279	0.22365	0.814934	0.909132	0.493919	0.317425	0.0850289	0.999752	0.309712
ENSFDAG00000004369	1.1885	-0.796847	-0.0655817	-0.231621	-0.62017	-0.058499	0.0334446	1.23713	0.178161	0.0161329	0.280922	0.350461	0.403694	0.406433	0.285274	0.0590456	0.605625	0.662109	0.294828	0.926642	0.958162	0.999752	0.665523
ENSFDAG00000004372	0.839743	-0.56203	-0.0935822	0.946444	-0.292585	0.379385	0.937438	0.777323	0.142509	0.00976666	0.194114	0.2482	0.276942	0.281119	0.340865	0.136538	0.343672	0.0317012	0.55701	0.47096	0.0770506	0.999752	0.301965
ENSFDAG00000004373	-0.307136	-0.0639083	0.0401973	-0.267367	0.0875378	-0.0264323	0.327841	0.104289	0.0208879	0.00128981	0.0270771	0.0349041	0.0385304	0.0392369	0.341572	0.658351	0.263026	0.1042	0.63939	0.892882	0.0979108	0.999752	0.319403
ENSFDAG00000004375	-1.57685	0.211397	0.178004	0.145887	-0.543247	0.1691	-0.381021	0.558601	0.0989475	0.00705963	0.137483	0.175205	0.196343	0.199066	0.0348768	0.501557	0.0341281	0.693985	0.19434	0.70274	0.393113	0.999752	0.472742
ENSFDAG00000004378	0.488623	0.0207175	-0.0875182	0.679962	0.241822	0.372967	-0.0588003	0.462823	0.0424451	0.00633521	0.0915849	0.108807	0.133531	0.132445	0.472613	0.9199	0.271525	0.02465	0.463493	0.307418	0.871644	0.999752	0.643327
ENSFDAG00000004386	0.681735	0.558232	-0.0556015	-0.648799	-0.370105	0.116866	0.243275	0.519788	0.0396727	0.00721338	0.0985615	0.114862	0.144534	0.142539	0.344358	0.00506843	0.512686	0.0387717	0.274817	0.75854	0.519341	0.999752	0.519781
ENSFDAG00000004387	-1.0135	0.168248	0.0965963	-0.306468	0.357944	0.337346	0.320825	0.336804	0.0715189	0.00411989	0.0898388	0.11638	0.12761	0.130246	0.080748	0.529264	0.132341	0.306555	0.294067	0.34499	0.37402	0.999752	0.464307
ENSFDAG00000004393	-0.256286	-0.52358	0.0591657	-0.351263	0.161125	0.130781	0.25816	0.338277	0.0901041	0.00395972	0.101251	0.132876	0.142368	0.14713	0.65947	0.0811142	0.347095	0.269634	0.658477	0.728886	0.500925	0.999752	0.512932
ENSFDAG00000004395	-0.0294419	-0.0835812	0.0305252	-0.247149	-0.835936	0.0551046	0.303227	0.148733	0.0196609	0.0019613	0.0327762	0.0405151	0.0472272	0.0474112	0.939147	0.551119	0.490655	0.172207	3.28109e-05	0.79983	0.163739	0.999752	0.363524
ENSFDAG00000004397	0.778421	-0.0480555	-0.0770104	0.152916	-0.335715	0.100866	-0.789513	0.27833	0.0694502	0.00329877	0.0804363	0.105317	0.11354	0.116803	0.140082	0.855308	0.179976	0.589768	0.300912	0.764679	0.0208822	0.999752	0.253078
ENSFDAG00000004399	0.0849373	-0.0207174	-0.0144119	-0.0554109	0.122447	-0.0044771	0.251945	0.0960994	0.019646	0.001184	0.025185	0.0325227	0.0358157	0.036501	0.784091	0.882494	0.675335	0.726969	0.497153	0.981126	0.187262	0.999752	0.37735
ENSFDAG00000004403	-0.389332	-0.0771608	0.0368494	0.146566	0.0730357	0.084319	0.47476	0.079542	0.0181001	0.000959996	0.0219355	0.0285646	0.0310849	0.0318222	0.167446	0.566286	0.234317	0.32237	0.665642	0.632476	0.00778185	0.999752	0.228594
ENSFDAG00000004404	0.975773	-0.330337	-0.0940966	-0.317698	0.638313	-0.695346	0.33507	0.928909	0.247426	0.0108734	0.278036	0.364879	0.390942	0.404019	0.311336	0.506625	0.366853	0.546835	0.29064	0.266094	0.598089	0.999752	0.550175
ENSFDAG00000004405	-0.125481	-0.0321223	0.0230351	-0.233568	0.0180831	-0.156802	0.295747	0.0927923	0.0128954	0.00121584	0.0208049	0.0258563	0.0299306	0.0300976	0.680391	0.777276	0.508855	0.10538	0.91046	0.364752	0.0882461	0.999752	0.311536
ENSFDAG00000004406	-0.567689	0.128213	0.062131	-0.215249	0.00922003	-0.0885904	-0.0325439	0.0721444	0.0075648	0.000975792	0.0147961	0.0178344	0.0214795	0.0213977	0.034555	0.140449	0.0467038	0.0767984	0.944957	0.545532	0.823943	0.999752	0.629914
ENSFDAG00000004409	0.359849	0.0505522	-0.0420876	0.188104	-0.156466	0.080883	-0.719739	0.324536	0.0515691	0.00417292	0.0764584	0.0963758	0.109544	0.110652	0.527604	0.823839	0.514704	0.49633	0.614257	0.806937	0.0304882	0.999752	0.258813
ENSFDAG00000004417	-0.0211826	-0.036218	0.00124232	0.167345	0.0931402	0.0439525	-0.317821	0.135341	0.0175468	0.00178895	0.0296309	0.0365503	0.0427214	0.0428601	0.954084	0.784533	0.976568	0.330968	0.626129	0.831602	0.124743	0.999752	0.338333
ENSFDAG00000004425	-1.08275	0.200993	0.111899	0.166737	0.0932307	-0.0834746	-0.463083	0.162239	0.0310949	0.00202261	0.0413027	0.0530314	0.0588499	0.0598321	0.00718539	0.254362	0.0128422	0.41197	0.685589	0.730773	0.058334	0.999752	0.286433
ENSFDAG00000004427	-0.314043	0.0187075	0.0254109	0.12419	0.108219	-0.394077	0.203982	0.170806	0.0276955	0.00218949	0.0405593	0.0512316	0.0580751	0.058703	0.447334	0.910497	0.587088	0.537462	0.632567	0.101995	0.399844	0.999752	0.475304
ENSFDAG00000004428	-0.122443	0.109613	0.0056592	0.236907	-0.0240646	0.0157374	-0.242438	0.0631437	0.0168191	0.000739132	0.0188999	0.0248031	0.0265748	0.0274637	0.626067	0.397997	0.835105	0.0848432	0.878555	0.923093	0.143489	0.999752	0.35014
ENSFDAG00000004430	0.254944	-0.0693894	-0.0219086	0.299879	-0.21567	-0.066624	-0.431808	0.347133	0.05221	0.00449955	0.0800916	0.100378	0.11494	0.115889	0.665226	0.761372	0.743962	0.289314	0.496047	0.844208	0.204641	0.999752	0.387146
ENSFDAG00000004438	-1.9506	0.119123	0.219362	-0.285907	0.290887	0.136827	0.249051	0.248047	0.039551	0.00318775	0.0585163	0.073786	0.0838289	0.0846872	8.98332e-05	0.549183	0.000102225	0.237239	0.284228	0.636512	0.392101	0.999752	0.472299
ENSFDAG00000004439	0.909154	-0.285801	-0.0917031	2.04785	1.39876	1.31625	1.11932	5.4905	0.220384	0.0786132	0.942916	1.03654	1.40629	1.36409	0.698016	0.542658	0.743617	0.0349512	0.169477	0.267024	0.337878	0.999752	0.449338
ENSFDAG00000004447	0.40367	0.483419	-0.0905211	-0.312752	1.00033	-0.132441	-0.366081	0.48107	0.099096	0.00591862	0.126516	0.163482	0.179878	0.183373	0.560567	0.124622	0.239343	0.379249	0.0133588	0.754833	0.392613	0.999752	0.472483
ENSFDAG00000004448	0.772722	0.209134	-0.112009	0.830462	0.0500105	-0.463966	-0.242929	0.856758	0.228207	0.0100288	0.25644	0.336537	0.360577	0.372637	0.403817	0.661543	0.263362	0.101019	0.931302	0.439725	0.690662	0.999752	0.5843
ENSFDAG00000004457	0.536476	-0.324911	-0.0396139	-0.164686	0.0461734	-0.181386	-0.190904	0.240531	0.0570069	0.00287979	0.0676933	0.0883852	0.0957773	0.0982447	0.274013	0.17357	0.4604	0.526753	0.876576	0.557808	0.542485	0.999752	0.529846
ENSFDAG00000004458	1.2097	-0.0682755	-0.0965299	-0.614964	-0.711558	-0.512844	-0.164773	0.677671	0.127227	0.00847946	0.17097	0.219099	0.243753	0.247638	0.141699	0.848201	0.294509	0.136943	0.12847	0.298922	0.740558	0.999752	0.60122
ENSFDAG00000004459	1.10206	-0.0808524	-0.13646	1.25958	-0.137741	0.188379	-0.84333	1.29297	0.121182	0.0176663	0.257275	0.306367	0.374847	0.372057	0.332448	0.816336	0.304575	0.0130176	0.803474	0.758323	0.166791	0.999752	0.364874
ENSFDAG00000004461	-0.148177	-0.0848617	0.0361878	-0.206086	-0.185922	-0.28863	-0.127376	0.106583	0.0222583	0.00130791	0.0282089	0.036493	0.0400898	0.0408907	0.649919	0.569487	0.317006	0.219812	0.330428	0.149434	0.528756	0.999752	0.524531
ENSFDAG00000004462	3.18601	0.0724454	-0.371112	2.44166	2.15229	0.103363	0.0388454	6.83005	0.223293	0.0984113	1.15271	1.24835	1.7261	1.66775	0.222811	0.878153	0.236811	0.0229552	0.0540622	0.937292	0.976003	0.999752	0.670282
ENSFDAG00000004463	0.0251226	0.166004	-0.00249685	-0.115725	-0.0936662	-0.0505645	0.0357557	0.0571457	0.00894478	0.00073644	0.0133852	0.0168457	0.019186	0.0193703	0.916302	0.0792199	0.926692	0.317181	0.470498	0.715073	0.79725	0.999752	0.620477
ENSFDAG00000004465	-0.129795	0.0432296	0.0121464	-0.170265	0.0604443	-0.0331246	0.326752	0.108868	0.0148396	0.00143005	0.0242448	0.0300688	0.0349005	0.0350726	0.694041	0.722687	0.748062	0.274178	0.727408	0.859265	0.0810271	0.999752	0.304269
ENSFDAG00000004474	0.130714	-0.068687	-0.0325362	0.0899266	0.0915188	-0.133884	-0.295819	0.326957	0.0321933	0.00444815	0.0659051	0.0788988	0.0958703	0.0953088	0.81918	0.701855	0.625664	0.726121	0.744562	0.665451	0.337958	0.999752	0.449366
ENSFDAG00000004478	0.310852	0.105671	-0.0447173	0.166245	-0.0277779	0.123842	-0.011288	0.077999	0.00657426	0.0010748	0.0151216	0.017805	0.0221066	0.0218682	0.265694	0.192486	0.17257	0.176401	0.835093	0.404884	0.939154	0.999752	0.660684
ENSFDAG00000004480	-0.136698	-0.0491863	0.0167072	-0.177325	0.0909628	0.0117665	0.198856	0.135771	0.0269243	0.00168223	0.0350929	0.0451972	0.0499516	0.0508487	0.710647	0.764361	0.683755	0.34385	0.668749	0.958013	0.377853	0.999752	0.466596
ENSFDAG00000004484	0.068496	0.0792464	-0.0128647	-0.0688794	-0.027321	0.11308	0.124506	0.069847	0.0186046	0.000817596	0.0209062	0.0274361	0.0293959	0.0303792	0.795501	0.561246	0.652771	0.633806	0.868988	0.509549	0.475021	0.999752	0.504032
ENSFDAG00000004487	0.79518	-0.237051	-0.0709527	0.302477	-0.132025	-0.212684	-0.930793	0.369538	0.0984308	0.00432564	0.110608	0.145156	0.155524	0.160726	0.190844	0.449906	0.280674	0.363092	0.728946	0.589676	0.0202482	0.999752	0.253078
ENSFDAG00000004489	1.20168	-0.295389	-0.105226	-0.428899	-0.00440885	-0.636604	0.344665	0.322615	0.0608298	0.00403371	0.0815454	0.104543	0.116245	0.118116	0.0343731	0.231047	0.0975577	0.133111	0.989121	0.0618788	0.315926	0.999752	0.440978
ENSFDAG00000004490	-0.145792	0.270306	0.00268709	0.0359278	0.0554287	-0.0895404	-0.114532	0.0378427	0.0094387	0.000448549	0.010934	0.0143157	0.0154343	0.0158774	0.453585	0.00539798	0.899039	0.731154	0.643175	0.471072	0.36338	0.999752	0.460114
ENSFDAG00000004493	1.12336	0.438643	-0.174196	0.542848	-0.374784	0.242315	-1.05757	1.79597	0.218689	0.0239148	0.385239	0.471972	0.55655	0.557187	0.401892	0.348249	0.259984	0.381788	0.585385	0.745326	0.15654	0.999752	0.358004
ENSFDAG00000004495	-1.56515	0.445736	0.150998	0.476564	0.497307	-0.0968169	-0.533472	1.29664	0.250592	0.0161409	0.331312	0.425719	0.471953	0.479974	0.169285	0.373241	0.234628	0.4077	0.445947	0.887926	0.441287	0.999752	0.492047
ENSFDAG00000004499	-1.11984	0.151604	0.117829	-0.391717	0.339494	0.0429733	0.263883	0.809133	0.0459547	0.0114217	0.145278	0.164485	0.214865	0.21013	0.213157	0.479439	0.270237	0.304085	0.402547	0.926136	0.564844	0.999752	0.538003
ENSFDAG00000004500	0.0295771	-0.0891025	0.00697408	-0.0876944	-0.0230715	-0.137593	-0.24692	0.0426184	0.00820244	0.000530923	0.0108697	0.0139618	0.0154858	0.0157466	0.886076	0.325201	0.76214	0.400276	0.845192	0.268866	0.0491006	0.999752	0.277854
ENSFDAG00000004503	-0.226887	-0.218361	0.0325479	0.120121	0.0193616	0.107699	0.0557667	0.155249	0.0208824	0.00204276	0.0344157	0.0426218	0.0495623	0.0497845	0.56473	0.13077	0.471442	0.517309	0.925282	0.628551	0.802637	0.999752	0.622378
ENSFDAG00000004505	-0.39222	0.0272037	0.0450831	-0.239203	0.0968375	-0.0404321	0.219302	0.062527	0.0141941	0.000755	0.0172228	0.022424	0.0244087	0.0249849	0.116755	0.819385	0.100851	0.0683495	0.517841	0.795794	0.165318	0.999752	0.364421
ENSFDAG00000004509	-0.114361	0.00179575	0.0245142	-0.283863	-0.205337	-0.00367527	-0.155786	0.0450591	0.012002	0.000527441	0.0134869	0.0176994	0.0189637	0.019598	0.590059	0.986922	0.285788	0.0145137	0.122724	0.978708	0.265788	0.999752	0.418223
ENSFDAG00000004511	0.170175	-0.349753	-0.00594203	-0.0732746	0.299032	-0.00425301	0.355021	0.158415	0.0341459	0.00193222	0.0425555	0.0551937	0.0604181	0.0617042	0.66897	0.058392	0.892471	0.722438	0.203076	0.986195	0.152943	0.999752	0.355803
ENSFDAG00000004517	0.234285	-0.0551894	-0.0234385	-0.0857707	0.178757	0.0860268	0.153368	0.114795	0.016265	0.00150029	0.0259153	0.0322743	0.03726	0.0374923	0.48926	0.665203	0.545098	0.594175	0.319724	0.655836	0.42832	0.999752	0.485611
ENSFDAG00000004519	-0.547595	0.0876963	0.0583857	-0.210093	-0.0639408	0.280686	0.178124	0.113511	0.0189588	0.00144834	0.027273	0.0345534	0.0390166	0.0394782	0.104092	0.524185	0.12499	0.203313	0.730861	0.155315	0.369993	0.999752	0.462751
ENSFDAG00000004521	0.0120207	0.0631121	0.00689784	-0.467531	-0.119487	0.104011	0.315802	0.126414	0.0240597	0.00157796	0.0320838	0.0411679	0.0457237	0.0464751	0.97303	0.684096	0.862144	0.00904987	0.55593	0.626672	0.142951	0.999752	0.349653
ENSFDAG00000004523	-0.436502	-0.204683	0.0414151	0.374693	0.354375	-0.0164188	0.383648	0.176524	0.0311309	0.00223256	0.0433662	0.0552412	0.0619404	0.0627899	0.29884	0.246018	0.380752	0.0719737	0.131616	0.947401	0.125758	0.999752	0.339448
ENSFDAG00000004528	0.805551	-0.344842	-0.0635214	-0.220056	-0.180041	-0.414213	-0.368384	0.102504	0.0133468	0.00135421	0.0224741	0.0277352	0.0323984	0.0325083	0.0118674	0.00283658	0.0843214	0.142135	0.279665	0.0213781	0.0410357	0.999752	0.270694
ENSFDAG00000004531	-0.0887781	-0.0544783	0.00996192	0.101527	-0.0105781	0.132713	0.247241	0.162522	0.0133046	0.00224434	0.0312966	0.036738	0.0457951	0.0452601	0.825702	0.636709	0.833449	0.56604	0.955988	0.535154	0.245174	0.999752	0.4063
ENSFDAG00000004533	-0.762435	0.235841	0.0659249	0.0328127	0.281312	0.0189035	0.179228	0.0997942	0.0189205	0.00124652	0.0252851	0.0324328	0.0360388	0.036626	0.0157995	0.0864265	0.0618688	0.836516	0.118275	0.92068	0.349012	0.999752	0.452828
ENSFDAG00000004534	-1.17695	0.732857	0.0966708	0.0880858	0.101464	1.08177	-0.552574	0.825045	0.0864431	0.01116	0.16917	0.203891	0.245592	0.244651	0.195063	0.0126808	0.360145	0.83042	0.822209	0.0290452	0.263924	0.999752	0.417627
ENSFDAG00000004541	0.463464	-0.048333	-0.0553613	0.230743	-0.102652	0.177513	-0.390216	0.23989	0.0375387	0.0030916	0.0561833	0.0707066	0.0805323	0.0813054	0.344017	0.803003	0.319412	0.330318	0.699464	0.531626	0.171155	0.999752	0.367418
ENSFDAG00000004554	-0.0816139	-0.130711	0.0295392	-0.212109	-0.0660492	-0.191018	-0.111886	0.0872985	0.0121458	0.00114368	0.0195811	0.0243383	0.0281689	0.0283272	0.782376	0.235607	0.38241	0.129571	0.672023	0.255069	0.506194	0.999752	0.514415
ENSFDAG00000004567	-0.0194219	0.15256	-0.00225282	-0.302782	-0.0445653	0.177906	0.278152	0.0581825	0.0102757	0.000735676	0.0143022	0.0182212	0.0204271	0.0207083	0.935825	0.132326	0.933805	0.0113481	0.741289	0.213219	0.0532487	0.999752	0.281159
ENSFDAG00000004569	0.842435	-0.976391	-0.0304717	-0.585206	0.115136	0.306452	0.0913875	0.620944	0.109364	0.007855	0.152463	0.194187	0.217773	0.22075	0.285034	0.00315232	0.730986	0.133941	0.793879	0.51138	0.845778	0.999752	0.635251
ENSFDAG00000004571	-0.583875	0.866142	0.0101721	0.494612	0.347334	-0.0267534	-0.594124	0.18964	0.0313889	0.00242317	0.0454001	0.0574666	0.0649666	0.0657148	0.179995	1.01457e-06	0.836289	0.0202692	0.147365	0.916406	0.0204691	0.999752	0.253078
ENSFDAG00000004576	-0.000203719	0.241561	-0.00987961	0.0457069	-0.301833	0.287943	-0.167588	0.119595	0.0318554	0.00139992	0.0357965	0.0469772	0.0503328	0.0520164	0.99953	0.175919	0.79174	0.809105	0.163744	0.199332	0.462458	0.999752	0.500085
ENSFDAG00000004588	0.99781	-0.162225	-0.0966356	-0.417474	-0.0832519	-0.088329	0.238297	1.03797	0.276476	0.01215	0.310681	0.407719	0.436843	0.451455	0.327388	0.757684	0.380652	0.453867	0.896265	0.893686	0.722845	0.999752	0.594875
ENSFDAG00000004594	0.354679	-0.18388	-0.039058	0.38485	-0.0131215	-0.0211558	-0.0177586	0.0547175	0.0145747	0.000640498	0.0163778	0.0214932	0.0230285	0.0237988	0.129455	0.127727	0.122758	0.00263655	0.928683	0.889126	0.908354	0.999752	0.653073
ENSFDAG00000004595	0.0511496	0.00735235	-0.00495313	-0.0799449	0.0650253	-0.140071	-0.107816	0.0261338	0.0059342	0.000315542	0.00719944	0.00937377	0.0102031	0.0104441	0.751696	0.923963	0.78037	0.346092	0.501824	0.165535	0.291429	0.999752	0.429952
ENSFDAG00000004596	1.15214	-0.107738	-0.106352	-0.130121	-0.748042	-0.192614	-0.361821	0.157168	0.0346428	0.00190873	0.0426748	0.0554436	0.0605425	0.06189	0.00365872	0.562696	0.0149209	0.528768	0.00148871	0.433737	0.145835	0.999752	0.351174
ENSFDAG00000004597	0.495506	-0.259983	-0.0405238	-0.0706038	0.0999403	0.175696	0.160799	0.107468	0.0164048	0.00139004	0.0249333	0.0312973	0.0357658	0.036079	0.13066	0.0423738	0.277073	0.654778	0.572128	0.352876	0.397241	0.999752	0.474817
ENSFDAG00000004600	-0.470471	-0.0608149	0.0534852	-0.00411605	0.0770247	-0.0746887	0.25491	0.139911	0.0243468	0.00177341	0.0341819	0.0434847	0.0488414	0.0494885	0.208468	0.696719	0.204058	0.982238	0.711852	0.735396	0.251849	0.999752	0.41012
ENSFDAG00000004604	1.25117	-0.565742	-0.100459	-0.116092	-0.1746	-1.12196	0.225586	0.464134	0.123628	0.00543294	0.138922	0.182313	0.195336	0.20187	0.0662818	0.107612	0.172907	0.755443	0.6826	0.011131	0.615609	0.999752	0.55679
ENSFDAG00000004609	2.39691	-0.93589	-0.195158	0.512327	-0.251975	-1.03548	-1.29148	1.95441	0.242135	0.0259731	0.421555	0.517439	0.608678	0.609727	0.0864319	0.0571795	0.225915	0.430066	0.72612	0.184431	0.0981397	0.999752	0.319829
ENSFDAG00000004611	0.201726	-0.0557049	-0.0186495	-0.0185481	-0.0326562	-0.22236	-0.221011	0.118211	0.0150807	0.00156557	0.0257424	0.0316983	0.0371342	0.0372346	0.557391	0.65011	0.637401	0.907966	0.854468	0.24854	0.252062	0.999752	0.41012
ENSFDAG00000004612	-0.209846	0.125116	0.0160915	-0.225758	0.140432	0.0159554	0.00105486	0.121289	0.0178067	0.0015775	0.0277354	0.0346718	0.0398329	0.040129	0.546809	0.348445	0.685369	0.175232	0.450738	0.936282	0.995799	0.999752	0.675066
ENSFDAG00000004613	0.38669	-0.0381572	-0.0437631	0.117067	0.000447797	0.00627203	-0.381866	0.087627	0.0135482	0.0011313	0.0204286	0.0256772	0.0292928	0.029562	0.191449	0.743048	0.193217	0.412752	0.99777	0.970767	0.0263523	0.999752	0.255716
ENSFDAG00000004614	0.223231	-0.247146	-0.0124936	0.0520689	-0.155391	0.0573114	0.148572	0.0788238	0.0114637	0.00102653	0.0179629	0.0224328	0.0258053	0.025989	0.426551	0.0209829	0.696579	0.697647	0.299506	0.721265	0.356737	0.999752	0.456279
ENSFDAG00000004617	0.302375	-0.101389	-0.0276345	0.0794843	-0.0231812	-0.223219	-0.0661447	0.0393909	0.00684511	0.000499407	0.00961814	0.0122341	0.0137436	0.013925	0.127629	0.2204	0.21624	0.417672	0.833996	0.0569023	0.57512	0.999752	0.541566
ENSFDAG00000004623	-0.345358	-0.0155725	0.0370109	-0.0944309	0.115984	0.00394567	0.287809	0.100307	0.0217895	0.00122164	0.0270458	0.0350992	0.0383884	0.0392184	0.275518	0.915982	0.289642	0.565832	0.53586	0.983933	0.146137	0.999752	0.351174
ENSFDAG00000004629	1.04848	-0.353418	-0.110394	0.160491	-0.272518	-0.140864	-0.581751	1.21867	0.133183	0.0164162	0.252924	0.306236	0.366678	0.36578	0.34223	0.332834	0.388904	0.749635	0.622397	0.816052	0.336103	0.999752	0.448904
ENSFDAG00000004630	0.520619	-0.588961	-0.0631686	0.316467	0.352293	0.0767148	0.880368	0.937363	0.19149	0.0115504	0.245575	0.317104	0.349241	0.355913	0.590762	0.178334	0.556691	0.523075	0.531571	0.896715	0.14003	0.999752	0.348751
ENSFDAG00000004633	0.340927	0.0907537	-0.0386387	-0.0990099	-0.056324	0.208619	-0.372151	0.20972	0.0558613	0.00245488	0.0627723	0.0823786	0.0882631	0.0912153	0.456597	0.700993	0.435483	0.69271	0.844423	0.482552	0.217869	0.999752	0.392849
ENSFDAG00000004637	0.522417	0.062873	-0.0975872	0.0232549	-0.29559	-0.00394146	-0.0995971	1.23872	0.0928036	0.0172118	0.233964	0.272139	0.343288	0.33836	0.638794	0.836489	0.456973	0.961655	0.57097	0.994633	0.86405	0.999752	0.640519
ENSFDAG00000004638	0.00183204	0.0178944	0.0136871	-0.288453	-0.0536904	-0.353752	-0.245895	0.108701	0.0288307	0.00127341	0.0324597	0.042594	0.0456546	0.0471657	0.995566	0.916068	0.701307	0.109368	0.794749	0.0978023	0.257535	0.999752	0.413819
ENSFDAG00000004645	-0.139214	0.160181	0.00868252	0.0737107	-0.15553	0.0901422	-0.0732467	0.0135863	0.00361888	0.000159035	0.00406659	0.00533675	0.00571797	0.00590922	0.232341	0.00775141	0.491143	0.247727	0.0332545	0.233228	0.340668	0.999752	0.450219
ENSFDAG00000004651	0.415914	0.00351455	-0.0990633	1.14538	-0.30054	-0.103559	-0.143401	3.08251	0.389539	0.0408703	0.669177	0.823153	0.965602	0.967906	0.81274	0.995507	0.624124	0.161463	0.740452	0.916069	0.884112	0.999752	0.646542
ENSFDAG00000004652	-0.346394	0.158267	0.0302866	0.136488	0.194152	-0.194965	-0.188257	0.0319534	0.00851115	0.000374031	0.00956412	0.0125514	0.013448	0.0138978	0.052646	0.0862504	0.117345	0.162825	0.0830973	0.0927178	0.110288	0.999752	0.325138
ENSFDAG00000004658	0.467475	0.0760243	-0.057584	0.050819	-0.110489	0.162041	-0.340692	0.0862161	0.0133995	0.00111224	0.0201395	0.0253275	0.0288736	0.0291441	0.111367	0.511334	0.0842319	0.72027	0.48752	0.340277	0.045971	0.999752	0.276006
ENSFDAG00000004661	1.277	0.357632	-0.138741	-0.220375	0.0356706	-0.0767027	-0.379015	0.868309	0.152541	0.0109889	0.212974	0.27119	0.304227	0.308358	0.170556	0.359836	0.185665	0.632985	0.94539	0.8894	0.494896	0.999752	0.510662
ENSFDAG00000004662	0.452776	0.151005	-0.0630202	0.211537	-0.280697	0.546063	-0.956258	0.448785	0.0634062	0.00586754	0.101212	0.126008	0.145531	0.146424	0.499123	0.548715	0.410667	0.506099	0.429091	0.152312	0.0124541	0.999752	0.231288
ENSFDAG00000004664	0.0142811	-0.0936513	0.0058398	-0.143856	-0.2734	0.25221	0.18156	0.0842574	0.0224429	0.000986278	0.0252195	0.0330966	0.0354607	0.0366468	0.960761	0.531882	0.852483	0.365012	0.132885	0.180462	0.342915	0.999752	0.451205
ENSFDAG00000004668	0.0840613	-0.10854	0.010733	-0.440147	-0.746644	-0.73866	0.0744584	1.11168	0.198545	0.01403	0.274551	0.350165	0.392	0.39755	0.936454	0.807548	0.9278	0.400901	0.207035	0.238087	0.905995	0.999752	0.652206
ENSFDAG00000004669	0.609048	0.0244014	-0.07257	0.237269	-0.0347005	-0.0269233	-0.194924	0.07221	0.0172111	0.00086358	0.0203806	0.0266194	0.0288291	0.0295805	0.0234217	0.852445	0.0135309	0.0965109	0.831573	0.87401	0.257069	0.999752	0.413454
ENSFDAG00000004671	0.684501	-0.304731	-0.0826269	0.476359	0.131279	-0.302873	-0.680614	1.23039	0.173622	0.016089	0.277362	0.345269	0.39883	0.401262	0.537172	0.464577	0.51478	0.365727	0.823211	0.631522	0.28262	0.999752	0.426075
ENSFDAG00000004672	0.55594	0.0322677	-0.0738074	0.418428	-0.137341	0.0163884	-0.434921	0.471666	0.0729328	0.00608934	0.109965	0.138219	0.157679	0.159128	0.418234	0.904893	0.344233	0.207017	0.711817	0.967079	0.275591	0.999752	0.422876
ENSFDAG00000004674	0.507506	-0.00961224	-0.03475	0.0780073	-0.384126	-0.485145	-1.37602	0.712303	0.0924412	0.00941418	0.156	0.19245	0.224912	0.225649	0.547624	0.974779	0.720232	0.843434	0.381238	0.306319	0.00377084	0.999752	0.204207
ENSFDAG00000004675	-0.389767	0.175145	0.0295882	0.0907016	0.00504399	0.0800351	-0.0412107	0.129311	0.0111196	0.00177914	0.025188	0.0297205	0.0367996	0.0364257	0.27841	0.0967272	0.483005	0.567659	0.976659	0.676522	0.829045	0.999752	0.631295
ENSFDAG00000004680	0.583257	-0.110085	-0.0495532	-0.195156	-0.0337136	-0.305844	-0.187614	0.0436393	0.007959	0.000548796	0.0108735	0.0138963	0.0155155	0.0157467	0.00523771	0.217218	0.0344067	0.0612718	0.774883	0.0140742	0.134887	0.999752	0.344812
ENSFDAG00000004683	0.47128	-0.311992	-0.0471142	0.198227	0.152923	-0.320833	-0.225708	0.494919	0.106776	0.00603557	0.13301	0.172523	0.188835	0.192862	0.50292	0.339685	0.544218	0.586768	0.712746	0.460326	0.607284	0.999752	0.553431
ENSFDAG00000004684	-0.000422729	0.151118	-0.0103892	0.0404121	-0.090311	0.297605	0.232303	0.112242	0.0163499	0.00146142	0.0255933	0.0319674	0.0367653	0.037029	0.998993	0.23727	0.785803	0.80057	0.613481	0.120638	0.22735	0.999752	0.396801
ENSFDAG00000004685	0.116935	-0.0433816	-0.0134862	0.0203903	0.158759	-0.048065	-0.118466	0.0992543	0.0166813	0.00126518	0.0239075	0.0303086	0.0341957	0.0346075	0.710514	0.736957	0.704575	0.895085	0.361811	0.794924	0.524249	0.999752	0.52258
ENSFDAG00000004686	0.900324	-0.191213	-0.087344	-0.0811234	-0.241964	-0.0516307	-0.128716	0.152932	0.0249	0.00195912	0.0363741	0.0459646	0.0520761	0.0526465	0.0213219	0.225604	0.0484567	0.670579	0.259068	0.821007	0.574812	0.999752	0.541566
ENSFDAG00000004688	-0.173428	-1.67652	0.123233	-0.797583	-0.151534	0.141051	1.42368	0.673178	0.104837	0.0086818	0.157372	0.197954	0.225607	0.227736	0.832595	2.24428e-07	0.185974	0.0443744	0.733415	0.766496	0.00285152	0.999752	0.204207
ENSFDAG00000004690	-0.25315	-0.0351364	0.00502421	0.294088	-0.0629875	0.114388	-0.0980808	1.04386	0.201748	0.0129942	0.266728	0.342733	0.379952	0.386411	0.804308	0.937648	0.964845	0.569061	0.91432	0.85278	0.874628	0.999752	0.644018
ENSFDAG00000004692	-0.349784	0.183456	0.0292087	0.100861	0.116207	-0.0789984	0.107363	0.0804598	0.0145622	0.00101317	0.0199828	0.025519	0.02852	0.0289372	0.217525	0.128445	0.358809	0.475534	0.466953	0.63994	0.527947	0.999752	0.524245
ENSFDAG00000004693	-0.540501	0.0551748	0.0588137	0.0606542	0.118946	0.119035	-0.0147725	0.0617301	0.0102609	0.000788242	0.0148033	0.0187459	0.0211806	0.0214276	0.0295969	0.585969	0.0361861	0.618119	0.384982	0.413408	0.919616	0.999752	0.655419
ENSFDAG00000004695	0.849116	-1.4577	0.00147304	-0.00257691	-0.214489	0.887529	0.398334	1.26084	0.198717	0.0162319	0.296108	0.372928	0.424345	0.428522	0.449529	0.00107536	0.990775	0.996222	0.725415	0.173053	0.542856	0.999752	0.529846
ENSFDAG00000004696	-0.774676	0.113801	0.064136	0.20415	0.264728	0.202843	0.252164	0.168934	0.0291136	0.0021447	0.0411084	0.0522461	0.0587553	0.0595139	0.0594595	0.504798	0.166083	0.313986	0.246794	0.40269	0.3013	0.999752	0.434528
ENSFDAG00000004703	-1.52374	-0.0952387	0.181845	-0.0568153	-0.219157	-0.871977	0.350915	0.809048	0.179747	0.00981036	0.220518	0.286668	0.312763	0.319834	0.0902575	0.822261	0.0663662	0.9037	0.682304	0.118953	0.534931	0.999752	0.527131
ENSFDAG00000004710	-0.0275583	-0.352222	0.0104822	0.210054	0.520729	-0.199133	0.292207	0.277866	0.0365277	0.00366665	0.0611184	0.075504	0.0880809	0.0884078	0.958306	0.0653415	0.862567	0.395515	0.0580824	0.502241	0.325728	0.999752	0.443304
ENSFDAG00000004711	0.10603	-0.113691	-0.00783445	0.163125	-0.00473792	-0.135514	-0.187587	0.150043	0.0247015	0.00191882	0.0358437	0.0453455	0.0512997	0.0518811	0.784293	0.469449	0.858055	0.388899	0.982249	0.549631	0.410186	0.999752	0.47989
ENSFDAG00000004713	-0.282977	0.467273	0.00283445	0.293681	0.335974	-0.0789115	-0.443018	0.147845	0.0393803	0.00173061	0.0442523	0.0580741	0.0622224	0.0643036	0.461761	0.018539	0.945678	0.162692	0.163268	0.751737	0.0806296	0.999752	0.304139
ENSFDAG00000004720	-0.467886	-0.0497012	0.0151001	-0.138921	-0.186048	-0.200574	0.337974	1.07171	0.106421	0.0145692	0.216518	0.259443	0.314876	0.313118	0.651297	0.878908	0.900443	0.765281	0.714916	0.720761	0.545851	0.999752	0.530513
ENSFDAG00000004722	0.658473	-0.0496439	-0.0710595	0.0285376	-0.231507	-0.0982888	-0.204032	0.138487	0.0226303	0.00177308	0.0329858	0.0416984	0.04722	0.0477431	0.0768224	0.741396	0.0914968	0.875144	0.256914	0.651042	0.35042	0.999752	0.452987
ENSFDAG00000004723	0.485092	-0.32431	-0.0426455	0.335065	-0.0188322	-0.11967	-0.0360914	0.136592	0.0311774	0.00164754	0.0377252	0.0491365	0.0534546	0.0547303	0.189338	0.0662528	0.293423	0.08451	0.932296	0.604739	0.877394	0.999752	0.644761
ENSFDAG00000004724	0.133924	0.0193771	-0.017127	-0.0985667	-0.139389	0.116798	0.271241	0.0274393	0.00730879	0.000321192	0.00821301	0.0107783	0.0115482	0.0119344	0.418811	0.820691	0.339248	0.276761	0.179395	0.277093	0.0130327	0.999752	0.233905
ENSFDAG00000004727	-0.512578	0.137997	0.0471076	-0.119146	0.179749	0.108857	0.215655	0.0558935	0.012729	0.000674477	0.01542	0.0200811	0.0218511	0.0223702	0.0301513	0.22128	0.069697	0.337314	0.204638	0.461482	0.14934	0.999752	0.35266
ENSFDAG00000004728	4.42348	-1.32293	-0.397032	-1.16218	-1.23726	1.24503	1.89425	3.91192	0.446266	0.0524636	0.822307	1.0003	1.19049	1.18926	0.025319	0.0476648	0.0830265	0.19998	0.216061	0.253834	0.0823877	0.999752	0.307215
ENSFDAG00000004736	0.0551043	0.247103	-0.00613012	0.062486	-0.179798	0.349874	-0.134823	0.162783	0.0238884	0.0021173	0.0372181	0.046524	0.0534524	0.0538491	0.891364	0.109873	0.894017	0.746017	0.404519	0.130201	0.56124	0.999752	0.536802
ENSFDAG00000004743	0.213091	-0.949774	0.0296426	0.110006	-0.39882	-0.0400888	0.265187	0.0671797	0.0132507	0.000833191	0.0173221	0.022299	0.0246604	0.0250982	0.410998	1.57195e-16	0.304449	0.403252	0.00756801	0.798504	0.0941497	0.999752	0.314983
ENSFDAG00000004746	1.09247	-0.141693	-0.166701	1.69467	0.895391	0.412305	-1.47852	1.6139	0.215945	0.0212498	0.357127	0.44203	0.514387	0.516602	0.389818	0.760432	0.252804	0.00457131	0.178061	0.565376	0.0396796	0.999752	0.270218
ENSFDAG00000004749	0.65679	-0.150461	-0.0602689	-0.103827	0.0173681	-0.0865812	-0.582538	0.131685	0.0259015	0.00163405	0.0339122	0.0436448	0.0482827	0.049135	0.0703093	0.349843	0.135976	0.572883	0.933744	0.69356	0.00858834	0.999752	0.228594
ENSFDAG00000004752	-0.153009	-0.289021	0.0416144	-0.199378	0.0248956	-0.274101	-0.164764	0.2049	0.0493257	0.00244565	0.0581251	0.0759621	0.0821851	0.0843721	0.735346	0.19314	0.400076	0.408247	0.928026	0.339009	0.570556	0.999752	0.540741
ENSFDAG00000004755	-0.0473506	-0.00635562	0.00554266	-0.0666793	-0.00307978	-0.0189644	0.158358	0.0554376	0.0122779	0.000672638	0.0150873	0.0196086	0.0214008	0.0218817	0.840616	0.95426	0.830772	0.587229	0.982453	0.896855	0.284381	0.999752	0.426075
ENSFDAG00000004759	0.0512547	-0.149031	0.00712219	-0.347426	0.178361	-0.0732972	0.0948816	0.0478298	0.01274	0.000559873	0.0143162	0.0187877	0.0201297	0.020803	0.814705	0.186715	0.763413	0.00368807	0.19317	0.605424	0.510642	0.999752	0.516043
ENSFDAG00000004761	-0.333163	-0.0965972	0.0416594	-0.182438	-0.0446669	0.185407	0.442783	0.0601789	0.0132358	0.000731153	0.0163229	0.0212035	0.0231589	0.0236722	0.174429	0.401115	0.123398	0.153302	0.759035	0.223098	0.00400362	0.999752	0.204207
ENSFDAG00000004763	2.65321	-0.6329	-0.236093	0.300693	-0.686566	-0.324201	-0.52913	0.908504	0.126327	0.0119031	0.203736	0.253218	0.293096	0.294737	0.0053757	0.0749642	0.0304658	0.505299	0.172449	0.54928	0.329738	0.999752	0.445586
ENSFDAG00000004766	-0.310778	0.0133097	0.0375126	0.109935	0.184895	-0.189249	0.0713812	0.0983803	0.0168003	0.00125084	0.0238506	0.0302849	0.0340983	0.0345277	0.321772	0.918213	0.288843	0.476559	0.288029	0.305426	0.700868	0.999752	0.588694
ENSFDAG00000004771	-0.0395449	0.130554	0.00891764	-0.176736	-0.0450635	-0.23334	-0.278313	0.138765	0.0369617	0.00162432	0.0415345	0.0545074	0.058401	0.0603544	0.915458	0.497095	0.824886	0.38583	0.846945	0.334264	0.25727	0.999752	0.413583
ENSFDAG00000004774	0.570652	-0.0225199	-0.0503077	-0.0544279	-0.135512	-0.391591	-0.0408043	0.161463	0.0120836	0.00224365	0.0304894	0.0354604	0.0447377	0.044094	0.155563	0.837677	0.288199	0.755263	0.471755	0.0641148	0.845926	0.999752	0.635251
ENSFDAG00000004782	-0.45833	-0.245619	0.0588384	-0.171564	0.215971	0.324696	0.332273	0.967882	0.173285	0.0122102	0.239282	0.305255	0.341619	0.346485	0.641307	0.555164	0.594397	0.725792	0.695872	0.578533	0.572424	0.999752	0.541242
ENSFDAG00000004787	-0.0117314	-0.0412346	0.00388915	-0.162451	0.182134	-0.137715	0.0983508	0.0696904	0.0163494	0.000836058	0.0195126	0.0254609	0.0276192	0.028316	0.964555	0.747085	0.893004	0.244845	0.253685	0.407296	0.558905	0.999752	0.536543
ENSFDAG00000004793	-0.0874799	-0.318599	0.0268664	-0.0853446	0.113698	-0.113034	0.287495	0.0735269	0.0150658	0.000905504	0.0192896	0.0249146	0.02743	0.0279572	0.746987	0.00944089	0.371953	0.538892	0.471327	0.494931	0.0855375	0.999752	0.309712
ENSFDAG00000004798	-1.22546	0.719477	0.121496	-0.522448	0.0672128	-0.0668479	-0.202341	0.428378	0.0241489	0.00604918	0.0768246	0.0869218	0.113645	0.111119	0.0611582	3.65906e-06	0.11826	0.0594405	0.819665	0.842814	0.543851	0.999752	0.530026
ENSFDAG00000004804	-2.69812	0.543038	0.291702	-0.381309	0.140426	-0.151582	-0.0865005	0.362571	0.0886534	0.00431431	0.10368	0.135613	0.146495	0.150523	7.43276e-06	0.068179	8.95291e-06	0.23633	0.702961	0.692077	0.823571	0.999752	0.629767
ENSFDAG00000004806	0.174812	-0.33152	-0.0319048	0.560011	0.546704	0.366242	0.631827	1.74282	0.229416	0.0229939	0.383518	0.473857	0.552684	0.554761	0.894654	0.488845	0.833354	0.365846	0.427081	0.622267	0.396276	0.999752	0.474368
ENSFDAG00000004809	-0.0629991	0.172491	-0.00937902	0.35398	-0.131511	0.378155	0.439616	0.121263	0.0193079	0.00155874	0.0285912	0.0360467	0.0409607	0.0413781	0.856436	0.214471	0.812224	0.0363088	0.488514	0.0616969	0.0306825	0.999752	0.258813
ENSFDAG00000004810	0.328914	-0.0112489	-0.058154	0.254708	0.0427485	-0.218243	0.253965	0.198019	0.0143427	0.00275746	0.0371414	0.0430537	0.054552	0.0537148	0.459819	0.925166	0.268098	0.186288	0.836773	0.350095	0.273172	0.999752	0.421771
ENSFDAG00000004825	1.93849	-0.956754	-0.163938	0.273525	-0.227681	-0.175809	0.333719	0.53938	0.0773744	0.00703758	0.122308	0.15252	0.175782	0.176951	0.0083038	0.000582687	0.0506781	0.434147	0.559898	0.674976	0.427585	0.999752	0.485611
ENSFDAG00000004826	-0.139467	0.127202	0.006849	0.0360999	0.0120415	0.13147	0.273973	0.0975578	0.0145261	0.00126635	0.0224248	0.028075	0.0321921	0.0324468	0.655223	0.291241	0.847379	0.809502	0.942709	0.463715	0.128267	0.999752	0.341526
ENSFDAG00000004828	1.14777	0.0436505	-0.118907	-0.166441	0.0784578	-0.0907054	0.144794	0.319993	0.0303068	0.00436827	0.0638445	0.0761126	0.0929894	0.0923284	0.0424565	0.802017	0.0720041	0.510079	0.776115	0.766122	0.633702	0.999752	0.562973
ENSFDAG00000004830	-1.68623	1.74606	0.0914405	0.364622	0.186756	-0.252726	-0.426988	0.404618	0.0771103	0.00504944	0.102751	0.13186	0.146428	0.148841	0.00802758	3.21899e-10	0.198158	0.25533	0.60704	0.508968	0.268398	0.999752	0.420049
ENSFDAG00000004832	-1.07208	-0.854846	0.0852307	0.49428	0.864599	-0.05812	-0.411133	2.57205	0.166243	0.0360615	0.472008	0.541001	0.695592	0.682664	0.503827	0.0360284	0.65356	0.471866	0.239802	0.944443	0.618768	0.999752	0.557866
ENSFDAG00000004834	0.53762	-0.35363	-0.0230591	-0.271248	-0.0920881	-0.157002	0.21373	0.133659	0.00703015	0.00189354	0.0237223	0.0266721	0.0351558	0.0343133	0.141416	2.46896e-05	0.596173	0.0782187	0.572846	0.402397	0.248577	0.999752	0.408273
ENSFDAG00000004836	0.382589	-0.0463005	-0.0305078	0.00202541	-0.218579	-0.0282649	-0.544552	0.739694	0.108928	0.0096165	0.169336	0.211755	0.243174	0.245007	0.656433	0.888433	0.755723	0.996073	0.634789	0.954292	0.271269	0.999752	0.421155
ENSFDAG00000004837	0.845511	-0.719014	-0.0409814	0.101242	0.422716	-0.407095	0.512916	1.13733	0.185547	0.0145652	0.270722	0.34217	0.387563	0.391835	0.427881	0.0950766	0.734181	0.845721	0.469896	0.513163	0.412559	0.999752	0.481432
ENSFDAG00000004839	0.856868	-0.338994	-0.08675	0.355451	0.374401	-1.048	-0.903678	0.174511	0.0191	0.00235043	0.036234	0.0438787	0.052528	0.052402	0.0402503	0.014172	0.0735583	0.0618554	0.0738808	4.81638e-06	7.89182e-05	0.8	0.174483
ENSFDAG00000004843	-0.471871	0.101005	0.0267442	0.373847	0.168606	0.143825	-0.0466709	0.223244	0.0267448	0.00297813	0.0476405	0.0582629	0.0688619	0.0689032	0.317942	0.536823	0.624085	0.0867503	0.484855	0.583637	0.858882	0.999752	0.638508
ENSFDAG00000004844	-1.25988	-0.285011	0.0873284	0.348537	0.30984	0.0100561	0.389037	0.917847	0.0201598	0.0133468	0.15237	0.161129	0.229499	0.220483	0.188491	0.0447144	0.449707	0.371915	0.440185	0.983253	0.407375	0.999752	0.478961
ENSFDAG00000004846	-0.387953	-0.220951	0.0398718	0.541149	-0.199536	0.297778	0.0428426	1.03601	0.122012	0.0138466	0.219908	0.268441	0.318042	0.318052	0.703091	0.527028	0.734731	0.248511	0.700148	0.597485	0.939445	0.999752	0.660719
ENSFDAG00000004847	0.855868	0.557406	-0.1135	-0.382596	-0.7759	0.408815	-0.897734	1.12549	0.216865	0.014018	0.287201	0.368937	0.409152	0.416061	0.419814	0.231326	0.337742	0.475279	0.201459	0.522743	0.16399	0.999752	0.363763
ENSFDAG00000004852	-0.0530467	0.441265	-0.0302837	0.474742	-0.358776	0.121718	-0.208084	0.952088	0.194456	0.0117323	0.249408	0.322047	0.354695	0.361467	0.956644	0.316989	0.779794	0.341802	0.527248	0.838061	0.729266	0.999752	0.59689
ENSFDAG00000004854	0.975977	-0.21542	-0.109541	0.230007	0.116881	-0.361353	0.54603	1.3252	0.289785	0.0161188	0.358448	0.465419	0.508664	0.519807	0.396542	0.689029	0.388246	0.70085	0.863968	0.612394	0.448841	0.999752	0.494712
ENSFDAG00000004855	0.211666	-0.817521	-0.00274451	0.458685	0.683325	-0.274759	0.998104	0.815934	0.122094	0.0105838	0.187897	0.235363	0.269696	0.271875	0.814731	0.0193017	0.978717	0.289979	0.158982	0.596755	0.0555924	0.999752	0.284494
ENSFDAG00000004856	0.191746	0.00539372	-0.014514	0.0154352	-0.177558	-0.130602	-0.345142	0.0473499	0.0126122	0.000554257	0.0141725	0.0185992	0.0199278	0.0205943	0.378219	0.961694	0.537566	0.89684	0.192935	0.354878	0.0161704	0.999752	0.24326
ENSFDAG00000004858	0.571479	0.368287	-0.0913877	0.614165	-0.442553	-0.106166	0.0106456	0.537026	0.143043	0.00628618	0.16074	0.210946	0.226014	0.233574	0.435488	0.330175	0.249058	0.125554	0.335265	0.82329	0.982426	0.999752	0.671677
ENSFDAG00000004860	0.517089	-0.142546	-0.0555672	0.313208	-0.0344285	-0.0227781	-0.728776	0.403684	0.0764183	0.00504379	0.102213	0.131089	0.145691	0.148057	0.41573	0.606097	0.433967	0.32725	0.924243	0.952413	0.058225	0.999752	0.286433
ENSFDAG00000004862	-0.179763	-0.0586234	0.0431695	-0.453415	-0.0134878	-0.0840378	0.119415	0.267061	0.0376608	0.0034925	0.0601885	0.0749194	0.0865493	0.0870751	0.727952	0.762589	0.465096	0.0645797	0.960699	0.775142	0.685712	0.999752	0.582138
ENSFDAG00000004871	0.192806	-0.285309	0.00932469	-0.277706	0.0247905	-0.433841	-0.383815	0.578053	0.153971	0.00676642	0.17302	0.227061	0.24328	0.251418	0.79981	0.467164	0.909746	0.504368	0.958509	0.379085	0.443996	0.999752	0.49304
ENSFDAG00000004872	3.67104	-0.832818	-0.327299	-1.02234	-1.90924	-0.451512	-1.14412	1.50998	0.126747	0.0208135	0.292456	0.344206	0.427604	0.422938	0.00281294	0.0193213	0.023288	0.0586973	0.00113692	0.489895	0.078531	0.999752	0.30267
ENSFDAG00000004874	-0.021407	0.124815	0.0028531	0.358887	-0.0887529	-0.41199	-0.887251	0.140513	0.0374272	0.00164478	0.0420576	0.0551939	0.0591365	0.0611145	0.954459	0.518817	0.943915	0.0801197	0.705595	0.0902316	0.000331937	0.999752	0.19778
ENSFDAG00000004878	0.31965	-0.124426	-0.0224746	0.260811	-0.159368	-0.154946	-0.216805	0.186425	0.0357845	0.00232351	0.0474916	0.0609862	0.0676651	0.0687982	0.459103	0.510697	0.641036	0.231389	0.51871	0.551403	0.40848	0.999752	0.479283
ENSFDAG00000004887	-0.184436	0.705727	-0.0217082	0.284128	0.188749	0.132691	-0.510139	0.0684509	0.0182327	0.000801255	0.0204884	0.0268877	0.0288084	0.029772	0.480844	1.72747e-07	0.443141	0.0471447	0.249697	0.434348	0.00311105	0.999752	0.204207
ENSFDAG00000004890	-1.58236	-0.410157	0.193495	-0.681271	0.224527	0.230246	0.0442799	0.614464	0.0957887	0.00792341	0.143701	0.180776	0.206003	0.207953	0.0435254	0.185093	0.0297223	0.0723082	0.597445	0.611952	0.922646	0.999752	0.656077
ENSFDAG00000004893	0.394679	-0.135906	-0.0341214	0.0941752	-0.12229	-0.238795	-0.563701	0.380464	0.048475	0.00503958	0.082817	0.101964	0.119471	0.119789	0.522261	0.537052	0.630765	0.743481	0.70174	0.489649	0.103377	0.999752	0.321054
ENSFDAG00000004907	0.580127	-0.0616293	-0.0677832	0.148041	-0.052294	0.0442217	-0.232768	0.206946	0.0253539	0.00275375	0.0444773	0.0545273	0.0642432	0.0643298	0.202222	0.698721	0.196462	0.482703	0.822799	0.861496	0.358757	0.999752	0.457514
ENSFDAG00000004909	-0.124942	0.0635778	0.017353	0.333934	-0.693745	-0.730435	-0.182112	1.39214	0.184847	0.0183476	0.307249	0.379978	0.442652	0.444444	0.915667	0.88244	0.898062	0.54688	0.260405	0.272262	0.784724	0.999752	0.616496
ENSFDAG00000004916	1.23426	-0.0346629	-0.101604	-0.0760398	-0.918461	0.23236	-1.05345	1.41298	0.274546	0.0175721	0.361899	0.465249	0.515442	0.524305	0.299111	0.947255	0.443391	0.899415	0.178129	0.746205	0.145706	0.999752	0.351174
ENSFDAG00000004917	-0.101525	0.0847344	0.00282747	0.214921	0.0353484	-0.0269092	-0.396825	0.0897635	0.0158963	0.00113448	0.0220903	0.0281508	0.0315479	0.0319852	0.734713	0.501542	0.9331	0.148169	0.833136	0.879581	0.0264983	0.999752	0.255716
ENSFDAG00000004920	-0.193032	0.0387078	0.00970858	0.129589	-0.0223951	0.251862	0.289874	0.0629661	0.00994139	0.000810404	0.0147976	0.01864	0.0212049	0.0214149	0.441737	0.697855	0.733074	0.286738	0.869706	0.0837027	0.0476081	0.999752	0.277021
ENSFDAG00000004922	-0.633941	-0.142913	0.0720336	0.00883773	0.0945972	0.160825	0.239848	0.943722	0.0571111	0.0132788	0.171206	0.194995	0.252773	0.247623	0.514034	0.54983	0.5319	0.982959	0.830373	0.749059	0.629811	0.999752	0.561561
ENSFDAG00000004924	-1.20822	0.138515	0.129998	0.0918375	-0.180861	-0.412726	-0.0160676	0.324691	0.0159418	0.00461367	0.0570816	0.0637932	0.08474	0.0825692	0.0339748	0.272618	0.0556359	0.700689	0.473945	0.156246	0.955408	0.999752	0.664792
ENSFDAG00000004929	0.797502	0.0946934	-0.0823601	-0.659901	0.202379	0.048651	-0.275327	0.813048	0.216565	0.00951717	0.243358	0.319368	0.342181	0.353626	0.376453	0.838758	0.398539	0.180997	0.720259	0.933717	0.643367	0.999752	0.56705
ENSFDAG00000004931	-0.80764	-0.0816205	0.0920377	-0.0410835	0.306082	0.063773	-0.326016	0.160095	0.0244724	0.00207034	0.0371628	0.0466552	0.0533064	0.0537757	0.0435395	0.601846	0.0430975	0.831238	0.156466	0.782383	0.159762	0.999752	0.360079
ENSFDAG00000004935	0.626636	-0.180912	-0.0581956	-0.164468	-0.0218382	0.0207342	-0.0349509	0.0784643	0.018019	0.000945288	0.0217363	0.028323	0.0307923	0.0315362	0.0252818	0.177746	0.0583826	0.264617	0.896755	0.905942	0.843974	0.999752	0.634839
ENSFDAG00000004937	0.525429	-0.273247	-0.0292281	-0.265149	-0.321409	-0.57382	-0.337637	0.300812	0.0453966	0.00389725	0.069492	0.0871247	0.0997184	0.100553	0.338062	0.199682	0.639649	0.3145	0.276198	0.0691959	0.286983	0.999752	0.427304
ENSFDAG00000004938	0.572149	-0.439448	-0.0793066	0.579951	0.0511858	-0.0465971	-0.00655715	1.40007	0.180234	0.0185223	0.305801	0.376922	0.441001	0.442327	0.628711	0.300614	0.56008	0.294294	0.933555	0.94406	0.992134	0.999752	0.674449
ENSFDAG00000004944	0.417094	-0.356674	-0.0513952	0.378783	0.398878	0.551451	0.347002	0.254928	0.0251321	0.00346783	0.0514031	0.0615458	0.0747717	0.0743367	0.408755	0.0244573	0.382795	0.0947835	0.107872	0.0437282	0.20312	0.999752	0.386092
ENSFDAG00000004945	-0.146302	0.0951778	0.016679	-0.00762	-0.218915	0.0535787	-0.284243	0.186938	0.0366315	0.00232125	0.0480604	0.0618326	0.0684339	0.0696322	0.735078	0.618986	0.729203	0.972272	0.378657	0.837719	0.281404	0.999752	0.425556
ENSFDAG00000004947	0.095528	-0.111568	0.0108198	-0.293642	-0.171349	-0.066365	0.452574	0.082766	0.00724373	0.00113719	0.0161901	0.0191391	0.0236404	0.0234132	0.739851	0.189901	0.748324	0.0210113	0.215504	0.66601	0.00309912	0.999752	0.204207
ENSFDAG00000004949	-0.550415	0.268654	0.040244	0.271151	-0.324071	0.586481	0.00223593	0.423339	0.076038	0.00533768	0.104802	0.133738	0.149609	0.151757	0.39758	0.329923	0.581744	0.402266	0.375532	0.129453	0.99542	0.999752	0.675007
ENSFDAG00000004951	-0.0912873	-0.0803774	0.0127541	-0.177053	-0.138779	0.0285565	0.313951	0.199547	0.0266718	0.00262773	0.0441401	0.0546277	0.0635792	0.0638507	0.838075	0.622605	0.803512	0.399383	0.552666	0.909831	0.214071	0.999752	0.390576
ENSFDAG00000004952	-0.0674022	-0.064816	0.0135789	-0.0859004	0.0992964	-0.153448	-0.0739783	0.151248	0.0266272	0.00191344	0.03713	0.0472892	0.0530358	0.0537599	0.862406	0.691213	0.756238	0.655747	0.647946	0.505212	0.74968	0.999752	0.603741
ENSFDAG00000004953	-0.923784	-0.0780332	0.126856	-0.223482	-0.0802204	-0.103542	-0.205535	0.213064	0.0298962	0.0027882	0.0479338	0.0596334	0.0689381	0.0693453	0.0453583	0.651769	0.0162873	0.30737	0.742531	0.69332	0.435092	0.999752	0.488733
ENSFDAG00000004956	0.921561	0.241977	-0.0955144	-0.0342454	-0.252824	-0.816338	-0.5599	0.680742	0.143708	0.00833639	0.181081	0.234468	0.257261	0.262514	0.264017	0.52327	0.295507	0.935859	0.601582	0.107514	0.274489	0.999752	0.422644
ENSFDAG00000004957	-0.371717	0.00350447	0.0456925	-0.269439	-0.0117174	0.00561741	0.352932	0.107218	0.0245749	0.00129218	0.0296735	0.0386603	0.0420393	0.043051	0.256285	0.982165	0.20369	0.117784	0.952479	0.978143	0.0889462	0.999752	0.311724
ENSFDAG00000004959	-1.59112	-0.65457	0.195183	0.157178	-0.0272321	0.104295	0.207133	1.16218	0.155864	0.0152976	0.257373	0.318639	0.370678	0.372303	0.139962	0.0973184	0.114545	0.756697	0.961523	0.863986	0.734256	0.999752	0.599174
ENSFDAG00000004960	1.0281	0.00132299	-0.106887	-0.15317	0.0543991	0.0419607	0.193915	0.216679	0.0224122	0.00293451	0.0442686	0.05328	0.0642936	0.06402	0.0271985	0.992949	0.0484798	0.46662	0.813686	0.868562	0.443441	0.999752	0.492819
ENSFDAG00000004967	0.82962	-0.153523	-0.0650454	-0.00372014	-0.308552	-0.559307	-0.488202	1.08835	0.178419	0.0139274	0.259559	0.328224	0.371529	0.375686	0.426477	0.716264	0.581521	0.994174	0.590183	0.358828	0.42574	0.999752	0.485092
ENSFDAG00000004976	1.29714	-0.238208	-0.151294	0.748982	-0.15193	-0.0298646	-0.558316	1.30789	0.234391	0.0164968	0.323475	0.4127	0.461806	0.4684	0.256696	0.622702	0.23882	0.187874	0.813047	0.964947	0.414628	0.999752	0.481531
ENSFDAG00000004978	0.257552	-0.284199	-0.0309132	-0.024509	0.0697457	0.416202	0.604335	0.483946	0.117011	0.00577132	0.137591	0.179858	0.194508	0.199731	0.711214	0.406072	0.684069	0.947319	0.869371	0.345321	0.176298	0.999752	0.369594
ENSFDAG00000004983	-0.211742	0.0909391	0.0216729	-0.164117	-0.000824617	0.14365	0.242753	0.0790619	0.0127047	0.00101486	0.0187079	0.0236086	0.0267942	0.0270756	0.45142	0.41978	0.496301	0.230182	0.995718	0.380174	0.140136	0.999752	0.348751
ENSFDAG00000004984	0.430079	0.357853	-0.0958366	0.664721	0.270901	0.711028	-0.731705	0.704326	0.10335	0.00916124	0.161029	0.20129	0.23127	0.232985	0.608328	0.265648	0.316693	0.0976237	0.54597	0.139269	0.129543	0.999752	0.342006
ENSFDAG00000004985	0.031748	0.192611	-0.00448793	-0.175564	-0.00105952	-0.0804563	0.0946032	0.185354	0.0161839	0.0025472	0.0362368	0.0428265	0.0529162	0.0524037	0.941216	0.130013	0.929143	0.356384	0.995915	0.726522	0.679415	0.999752	0.581218
ENSFDAG00000004991	0.311879	-0.0918087	-0.0134246	-0.536133	-0.169002	0.0332066	-0.240128	0.163436	0.0435332	0.00191311	0.048919	0.0641984	0.0687842	0.0710849	0.440436	0.659922	0.758901	0.0153503	0.504769	0.899246	0.367776	0.999752	0.461945
ENSFDAG00000004992	1.17794	0.00657246	-0.128044	0.226397	-0.131889	0.0541792	-0.900146	1.07825	0.231081	0.0131662	0.288864	0.374482	0.410191	0.418823	0.256628	0.989091	0.264459	0.673585	0.829359	0.932584	0.164254	0.999752	0.363809
ENSFDAG00000004993	-0.0913379	-0.00413895	-0.000995234	0.115168	0.0795421	0.248781	0.369197	0.0713925	0.00860944	0.000951691	0.0152669	0.0186844	0.0220628	0.0220809	0.73247	0.964421	0.974264	0.351292	0.560626	0.0939551	0.0129711	0.999752	0.233905
ENSFDAG00000004994	-0.153944	-0.0468464	0.0263137	-0.139322	-0.0976039	-0.00923966	0.123142	0.0705062	0.0126087	0.000889636	0.0174224	0.0222234	0.0248745	0.0252278	0.562076	0.676534	0.377658	0.291189	0.512642	0.953283	0.438165	0.999752	0.490689
ENSFDAG00000005003	4.29744	-1.64589	-0.279941	-0.273756	-2.41536	-0.440659	0.185816	5.34655	0.557417	0.0723547	1.09475	1.31874	1.58956	1.58321	0.0630917	0.0274888	0.298006	0.793598	0.0354386	0.726703	0.882597	0.999752	0.646015
ENSFDAG00000005004	0.0647654	0.0320833	-0.00906001	-0.0113115	0.108914	-0.0963507	-0.187539	0.0303415	0.00658021	0.000369644	0.00817456	0.0106073	0.0116035	0.0118535	0.710032	0.692465	0.637474	0.900437	0.290281	0.371076	0.084973	0.999752	0.309712
ENSFDAG00000005005	-1.01661	0.62645	0.0751338	-0.160724	0.0222772	0.826063	0.0963611	0.283286	0.028921	0.0038413	0.057667	0.0693073	0.0837883	0.083396	0.0561283	0.000229905	0.225413	0.503307	0.932564	0.00432015	0.738622	0.999752	0.601154
ENSFDAG00000005010	0.365394	-0.673553	0.00543646	-0.495915	-0.323605	-0.398565	0.681845	0.339863	0.0905266	0.00397828	0.101726	0.133499	0.143035	0.14782	0.530809	0.0251796	0.931314	0.119979	0.375791	0.291954	0.0761537	0.999752	0.300477
ENSFDAG00000005011	0.178892	-0.365646	-0.034122	0.453744	0.316502	-0.15393	0.169056	0.56357	0.0784698	0.0073825	0.126443	0.157175	0.181894	0.182921	0.811652	0.191791	0.691271	0.201942	0.424677	0.718157	0.69264	0.999752	0.585124
ENSFDAG00000005014	-0.585492	0.192198	0.0500335	0.0302255	0.190322	0.0269073	-0.0529164	0.100548	0.0143303	0.00131305	0.0227467	0.028346	0.0326983	0.0329087	0.0648289	0.108374	0.167351	0.841162	0.258294	0.88171	0.770517	0.999752	0.612091
ENSFDAG00000005016	1.01228	-0.000355889	-0.129378	1.11876	1.16871	0.375866	0.0570832	1.56804	0.0765571	0.0222862	0.275462	0.307702	0.408991	0.39846	0.418865	0.998974	0.386136	0.0330394	0.0351265	0.556715	0.927945	0.999752	0.657476
ENSFDAG00000005017	1.58771	-0.0619852	-0.16678	0.00722288	-0.401914	-0.782397	0.676412	0.74328	0.165471	0.00900929	0.202792	0.263664	0.287601	0.29413	0.0655335	0.878887	0.0788997	0.987203	0.43379	0.144587	0.212319	0.999752	0.390014
ENSFDAG00000005018	0.483192	-0.243232	-0.0395995	-0.0922712	0.13717	-0.330818	0.294733	0.0603969	0.011571	0.000753016	0.0153731	0.0197378	0.0219045	0.0222697	0.0492834	0.0237482	0.149	0.456759	0.328885	0.025402	0.0482661	0.999752	0.277548
ENSFDAG00000005022	-0.189211	-0.0873682	0.0466231	-0.405445	-0.044006	-0.293184	-0.510323	0.0985305	0.0248407	0.00116544	0.02863	0.0375032	0.0403913	0.0415787	0.546653	0.57935	0.172033	0.0165665	0.82024	0.144619	0.0123249	0.999752	0.230215
ENSFDAG00000005023	0.00275064	-0.030981	-0.0232615	0.0827308	-0.181971	-0.55393	-0.756788	1.18344	0.158672	0.0155779	0.262057	0.324429	0.377427	0.379079	0.997983	0.938006	0.852152	0.871613	0.749363	0.367243	0.21901	0.999752	0.393554
ENSFDAG00000005024	0.50362	-0.0858167	-0.0595585	0.25353	-0.194858	0.0393171	-0.561845	0.659371	0.0766463	0.00882528	0.139399	0.169921	0.20169	0.201609	0.535121	0.75658	0.52609	0.497107	0.63642	0.930237	0.210824	0.999752	0.389554
ENSFDAG00000005026	0.955151	-0.2484	-0.063834	-0.877808	0.219757	0.603389	0.327885	1.9726	0.222496	0.0264865	0.41324	0.502069	0.598483	0.597643	0.496461	0.598463	0.694889	0.172089	0.756453	0.435416	0.67147	0.999752	0.577321
ENSFDAG00000005027	0.579268	-0.315118	-0.0275171	-0.432598	-0.252697	-0.336711	0.0211791	0.880579	0.162782	0.0110482	0.220682	0.282393	0.314769	0.319611	0.537038	0.434783	0.793481	0.357116	0.634413	0.548405	0.970116	0.999752	0.66899
ENSFDAG00000005030	0.293094	-0.0441942	-0.0299486	0.0831548	-0.195657	0.15462	-0.284905	0.203503	0.0227502	0.00273499	0.0425185	0.0516081	0.0615961	0.0614915	0.515877	0.769519	0.566873	0.686748	0.389092	0.533284	0.250586	0.999752	0.409302
ENSFDAG00000005034	0.00133846	-0.21321	0.0226841	-0.439547	0.187948	-0.304116	-0.196438	0.156181	0.0416006	0.00182818	0.0467473	0.0613483	0.0657305	0.0679291	0.997298	0.295865	0.595743	0.0420572	0.447962	0.235546	0.45103	0.999752	0.495896
ENSFDAG00000005037	0.0724807	-0.169317	0.0177001	-0.128184	-0.254976	-0.148854	-0.0652147	0.0688994	0.00915604	0.000907956	0.0152106	0.0188128	0.0219133	0.0220026	0.782448	0.0768139	0.556926	0.298644	0.0630314	0.314629	0.660189	0.999752	0.574025
ENSFDAG00000005038	-1.04338	0.0879706	0.115704	-0.0571632	0.0217407	-0.0589635	0.133181	0.159953	0.0426053	0.00187233	0.0478763	0.06283	0.067318	0.0695697	0.00908511	0.669968	0.00749582	0.7939	0.930883	0.820224	0.613608	0.999752	0.55581
ENSFDAG00000005040	0.692489	-0.25029	-0.0838924	-0.223051	0.632675	0.189862	0.691371	0.582774	0.155229	0.00682168	0.174433	0.228915	0.245267	0.253471	0.364345	0.525252	0.30976	0.5933	0.186055	0.701445	0.169677	0.999752	0.366766
ENSFDAG00000005043	-0.494981	-0.0352791	0.021855	-0.0816223	-0.398713	-0.168006	-0.621203	1.38321	0.125354	0.0189522	0.2729	0.323807	0.398041	0.394652	0.673853	0.920628	0.873864	0.87584	0.483505	0.790013	0.322741	0.999752	0.442474
ENSFDAG00000005046	0.0262798	-0.113711	-0.00637535	0.309908	-0.0623938	0.119403	0.196089	0.0554112	0.0147594	0.000648618	0.0165854	0.0217657	0.0233205	0.0241005	0.911108	0.349283	0.802334	0.0161101	0.672356	0.434277	0.20655	0.999752	0.388032
ENSFDAG00000005047	0.617151	-0.739747	-0.0669643	0.529169	0.233307	-0.276391	0.53987	1.09545	0.156125	0.0143055	0.247821	0.308823	0.356241	0.358533	0.555425	0.0611819	0.575564	0.287791	0.67461	0.64331	0.367258	0.999752	0.461875
ENSFDAG00000005048	-0.7744	0.492832	0.0438693	0.375734	0.312373	0.344502	0.0918453	0.351397	0.0708781	0.00434026	0.0915269	0.118057	0.130214	0.132637	0.191426	0.0641473	0.505481	0.214252	0.363279	0.339735	0.800896	0.999752	0.62165
ENSFDAG00000005049	0.73424	-0.882333	-0.0455852	-0.377885	0.216445	0.482969	0.464354	0.5643	0.150308	0.00660544	0.168904	0.221659	0.237492	0.245436	0.32836	0.0228557	0.574876	0.357847	0.645708	0.321663	0.348603	0.999752	0.452779
ENSFDAG00000005052	-0.218151	-0.0927085	0.0231328	0.191516	0.116103	0.0864469	-0.0190661	0.0419495	0.0111719	0.000491056	0.012555	0.0164763	0.0176535	0.0182438	0.286827	0.380425	0.296528	0.08741	0.365727	0.515286	0.887745	0.999752	0.647453
ENSFDAG00000005053	-1.25925	-0.0455557	0.16628	-0.411984	0.0983512	-0.257575	-0.233022	0.299862	0.0440522	0.0038997	0.0685865	0.0857455	0.0985003	0.0992349	0.0214715	0.82817	0.00775138	0.115692	0.736967	0.411816	0.459473	0.999752	0.499051
ENSFDAG00000005054	0.137986	-0.250121	0.00220101	-0.0979758	-0.168148	-0.185167	-0.189566	0.39006	0.0411193	0.00527306	0.0801182	0.0966262	0.116288	0.115865	0.825142	0.217401	0.97582	0.729237	0.588553	0.587133	0.577591	0.999752	0.542845
ENSFDAG00000005056	0.0211577	0.0952368	-0.0100451	-0.0217441	0.148305	0.0175182	0.284831	0.11827	0.011448	0.00161146	0.0237318	0.0283583	0.034541	0.0343196	0.950943	0.373411	0.802407	0.887753	0.378493	0.924903	0.12417	0.999752	0.338208
ENSFDAG00000005060	-0.0936865	-0.0918719	0.0165614	-0.134996	-0.00589093	0.0631561	0.143087	0.0444443	0.00944955	0.000543525	0.0118621	0.0153682	0.0168486	0.0171976	0.656757	0.344609	0.477471	0.215168	0.962099	0.626573	0.275227	0.999752	0.422876
ENSFDAG00000005063	0.120132	-0.0524423	-0.0027213	-0.168596	-0.00539367	-0.0927302	-0.29401	0.039497	0.007999	0.000487479	0.0103066	0.0132987	0.0146613	0.0149364	0.54553	0.557634	0.901906	0.096775	0.962696	0.443775	0.0161423	0.999752	0.24326
ENSFDAG00000005067	0.155769	-0.0135817	-0.00677501	-0.293364	-0.117054	-0.0375394	0.00877493	0.0662872	0.014952	0.000801405	0.0182015	0.0236875	0.0258016	0.0264029	0.545169	0.911559	0.810855	0.0296698	0.446925	0.815216	0.956933	0.999752	0.665389
ENSFDAG00000005074	0.305693	0.0509349	-0.0407694	0.0462899	0.171339	0.182019	-0.321856	0.344105	0.037995	0.0046305	0.071632	0.0868281	0.103814	0.103595	0.602282	0.793855	0.549087	0.862687	0.560925	0.572128	0.317319	0.999752	0.441345
ENSFDAG00000005076	-0.0384101	0.0360836	-0.00545576	0.0702699	0.271045	-0.0597143	0.119763	0.0771398	0.019245	0.000914294	0.0222911	0.0291859	0.0314655	0.0323693	0.890007	0.794782	0.856814	0.637887	0.112614	0.736391	0.505624	0.999752	0.514115
ENSFDAG00000005087	-0.328481	-0.16344	0.0325062	0.0917021	0.189921	-0.0359718	-0.0839464	0.0731054	0.00928478	0.000968712	0.0158964	0.0195648	0.0229344	0.022993	0.22441	0.0898507	0.296298	0.467026	0.174528	0.812245	0.579845	0.999752	0.544009
ENSFDAG00000005088	-1.09842	0.225685	0.114938	-0.189909	-0.382718	-0.26679	-0.0033737	0.399546	0.0638219	0.00513333	0.0943218	0.118957	0.135116	0.136507	0.0822569	0.371673	0.108666	0.536341	0.267153	0.467962	0.992714	0.999752	0.674505
ENSFDAG00000005090	-0.76253	0.363102	0.0444977	0.953175	-0.357055	0.677752	0.0544242	0.737063	0.195837	0.00863168	0.220312	0.289108	0.309831	0.32013	0.37444	0.411928	0.631974	0.0422817	0.506654	0.223372	0.92337	0.999752	0.656417
ENSFDAG00000005093	0.00928638	0.0485309	-0.000112029	-0.106636	0.0610233	-0.00838119	0.114779	0.0592606	0.00783072	0.000781486	0.0130576	0.01614	0.0188149	0.018888	0.96957	0.5834	0.996803	0.35072	0.63099	0.951278	0.403629	0.999752	0.47725
ENSFDAG00000005095	-0.23559	-0.408901	0.0164101	0.744534	-0.216407	0.438677	0.635182	0.749731	0.121409	0.0096124	0.17794	0.224731	0.254794	0.257538	0.785557	0.240586	0.867074	0.0775618	0.648031	0.384813	0.210703	0.999752	0.389554
ENSFDAG00000005096	2.00915	-1.1679	-0.173614	-0.430682	1.02949	-0.734864	1.4702	0.93941	0.177849	0.0117371	0.23787	0.30507	0.339049	0.344555	0.0381785	0.00561672	0.10904	0.377207	0.0623367	0.206932	0.0122572	0.999752	0.230215
ENSFDAG00000005098	-0.00238427	-0.0477457	0.0106673	-0.181131	0.0398013	-0.153829	-0.0189752	0.165935	0.0288043	0.00210412	0.0404987	0.0515081	0.0578715	0.0586332	0.99533	0.778462	0.81611	0.368087	0.860787	0.522532	0.937539	0.999752	0.660226
ENSFDAG00000005102	0.149867	0.0452856	-0.0193943	0.0626488	0.109322	-0.196499	0.0768016	0.12397	0.0111273	0.00169991	0.0244003	0.0289222	0.0356002	0.0352863	0.670366	0.667703	0.638074	0.688372	0.52034	0.297673	0.682648	0.999752	0.581911
ENSFDAG00000005103	-0.365446	-0.108861	0.0443208	0.318327	-0.0671637	-0.0869234	-0.557796	0.56658	0.074431	0.00747706	0.124594	0.153909	0.179563	0.180226	0.627319	0.689878	0.608261	0.367148	0.864067	0.837471	0.188875	0.999752	0.378059
ENSFDAG00000005105	-0.36716	-0.394083	0.0493238	0.310596	0.072285	-0.364959	-0.381199	0.87981	0.13003	0.0114323	0.20168	0.252297	0.289589	0.291808	0.695475	0.274454	0.644579	0.48918	0.885571	0.497649	0.480392	0.999752	0.505344
ENSFDAG00000005106	0.084357	0.0408038	-0.0197669	0.13878	-0.00923172	0.111709	-0.169514	0.0772719	0.0106674	0.00101336	0.0172848	0.0214662	0.0248716	0.0250048	0.761535	0.692794	0.534632	0.291157	0.949759	0.478738	0.28372	0.999752	0.426075
ENSFDAG00000005113	0.0484012	-0.0367185	-0.00945801	0.143064	0.119068	-0.0781681	0.108525	0.0432629	0.0115236	0.000506415	0.0129492	0.0169938	0.0182077	0.0188167	0.815994	0.732312	0.674275	0.208678	0.361045	0.562388	0.428858	0.999752	0.485611
ENSFDAG00000005116	0.421934	-0.0427772	-0.042045	0.0473177	-0.185948	0.0749611	-0.0608477	0.105369	0.0244161	0.00126717	0.0293203	0.038228	0.0415217	0.0425432	0.193658	0.784267	0.237552	0.782289	0.341582	0.712968	0.76799	0.999752	0.610812
ENSFDAG00000005117	0.583118	-0.167518	-0.0407705	-0.281934	-0.175678	0.0584289	0.175012	0.153911	0.026314	0.0019565	0.0373308	0.0474073	0.0533686	0.0540428	0.137186	0.301751	0.356667	0.144512	0.41975	0.800329	0.45155	0.999752	0.495896
ENSFDAG00000005123	0.442939	0.0177019	-0.0512614	0.0683695	-0.157233	-0.10295	-0.512994	0.460534	0.0655009	0.00601578	0.104109	0.129707	0.149665	0.150618	0.51395	0.944857	0.508668	0.83219	0.662418	0.790152	0.186226	0.999752	0.377174
ENSFDAG00000005124	-0.695013	0.368426	0.0623333	0.441701	-0.28882	-0.106384	-0.254864	0.701075	0.18674	0.00820647	0.209842	0.275385	0.295056	0.304925	0.406503	0.393895	0.491399	0.33493	0.582064	0.844728	0.644409	0.999752	0.567423
ENSFDAG00000005126	0.444542	-0.679283	-0.0267556	0.304434	-0.19165	0.220288	1.04377	0.443766	0.0374103	0.00611488	0.0860361	0.101306	0.125777	0.124422	0.504566	0.00044474	0.732235	0.299319	0.547087	0.534507	0.00308571	0.999752	0.204207
ENSFDAG00000005128	1.47034	-0.280439	-0.16535	0.356224	0.156436	-0.144825	-0.482428	0.929376	0.15713	0.0118354	0.224399	0.284651	0.320909	0.324839	0.127214	0.479274	0.128538	0.452057	0.769361	0.798217	0.397305	0.999752	0.474817
ENSFDAG00000005129	-4.78605	2.16722	0.410665	0.163148	0.283344	0.591224	-0.428687	0.671293	0.107109	0.00862618	0.158404	0.199754	0.226921	0.22925	5.17442e-09	3.54305e-11	9.79754e-06	0.681864	0.526102	0.214561	0.370608	0.999752	0.462762
ENSFDAG00000005130	0.393458	0.309094	-0.097835	0.802251	0.317411	0.267487	-0.400849	1.09608	0.181399	0.0140056	0.26239	0.332124	0.375476	0.379798	0.707052	0.468006	0.408412	0.117311	0.58179	0.662454	0.515411	0.999752	0.51765
ENSFDAG00000005133	-0.749046	0.332108	0.0541652	0.0761998	0.178397	0.481577	0.23321	0.123668	0.0187226	0.00160148	0.0286031	0.0358727	0.0410404	0.0413882	0.0331715	0.0152179	0.175895	0.652311	0.346242	0.0174462	0.251659	0.999752	0.41012
ENSFDAG00000005136	-0.0603421	0.0743655	-0.00641927	0.0334032	0.164666	0.0539124	-0.0112617	0.217502	0.0304488	0.00284714	0.0488924	0.060811	0.0703218	0.0707318	0.897052	0.669982	0.904242	0.879923	0.504293	0.838898	0.966224	0.999752	0.667828
ENSFDAG00000005139	-0.311753	-0.0687765	0.0315811	0.0379026	0.186571	0.00125022	0.160999	0.0935247	0.0151945	0.00119849	0.0222254	0.0280792	0.0318217	0.0321679	0.308009	0.576877	0.361642	0.79931	0.265537	0.994408	0.369367	0.999752	0.462641
ENSFDAG00000005140	1.43527	-0.353705	-0.159288	0.103489	-0.40606	0.124242	-0.650118	0.912531	0.13128	0.0119016	0.207137	0.258383	0.297672	0.299681	0.132972	0.328962	0.144266	0.820123	0.424385	0.819865	0.234999	0.999752	0.400474
ENSFDAG00000005141	-0.6893	0.346575	0.0714691	0.111656	-0.177013	-0.187394	-0.754637	0.550207	0.120993	0.00668505	0.149226	0.193842	0.211723	0.216413	0.352745	0.319073	0.382059	0.772551	0.687645	0.683817	0.104767	0.999752	0.322683
ENSFDAG00000005146	0.928435	-1.09963	-0.0238144	-0.528281	-0.271122	0.305309	0.852544	0.515989	0.0519862	0.00700527	0.104657	0.125602	0.152128	0.15135	0.196183	1.41539e-06	0.776005	0.102473	0.444266	0.433761	0.0284215	0.999752	0.258604
ENSFDAG00000005152	0.315455	0.0657346	-0.0511117	0.328604	0.0526518	0.196073	-0.47885	0.451299	0.0594711	0.00595343	0.0993475	0.122763	0.143164	0.143707	0.638659	0.787506	0.507699	0.297159	0.88055	0.604315	0.206529	0.999752	0.388032
ENSFDAG00000005154	-0.591665	-0.178567	0.0820328	-0.358004	-0.10437	0.264574	0.312251	0.35765	0.0321069	0.00490414	0.0703967	0.0834443	0.102709	0.101804	0.322496	0.318979	0.241437	0.177237	0.71787	0.40906	0.327759	0.999752	0.444197
ENSFDAG00000005157	-0.192744	0.0606448	0.0184969	-0.130731	-0.0569471	0.118954	0.240177	0.0496804	0.013233	0.000581536	0.0148701	0.0195146	0.0209086	0.0216079	0.387178	0.598063	0.443065	0.283691	0.683528	0.410707	0.10228	0.999752	0.321054
ENSFDAG00000005159	1.04567	0.137533	-0.151026	0.132796	-0.243547	0.409546	-0.0985916	0.41649	0.0268749	0.00583996	0.0764089	0.0875635	0.112608	0.11051	0.105172	0.401502	0.0481232	0.630934	0.410486	0.222297	0.766789	0.999752	0.610447
ENSFDAG00000005163	0.616354	-0.133559	-0.058617	0.191043	0.0527181	-0.0814822	-0.192181	0.0994446	0.0138862	0.00130218	0.0223341	0.027771	0.0321257	0.0323102	0.0506398	0.257047	0.104295	0.201128	0.751739	0.649391	0.285001	0.999752	0.426369
ENSFDAG00000005164	0.162719	0.0669147	-0.0256939	0.144075	-0.0285752	0.0206967	0.0240691	0.0355783	0.00679287	0.000443854	0.00904225	0.0116059	0.0128852	0.0130985	0.388317	0.416857	0.222625	0.129738	0.790819	0.855325	0.83343	0.999752	0.631704
ENSFDAG00000005165	1.72227	-1.35992	-0.161367	1.07463	0.802362	-0.072909	0.373502	2.21931	0.238201	0.0299493	0.458194	0.553684	0.664659	0.662637	0.247644	0.0053298	0.35111	0.112381	0.2809	0.92874	0.646354	0.999752	0.568446
ENSFDAG00000005171	0.225581	-0.170392	-0.0191859	0.228791	-0.0188599	-0.125511	-0.649773	0.491781	0.0789534	0.00631351	0.116325	0.146783	0.16661	0.168355	0.747699	0.544246	0.809198	0.502338	0.960739	0.758471	0.113282	0.999752	0.327317
ENSFDAG00000005172	0.0626679	-0.097785	-0.0203863	0.348419	0.220261	0.11973	0.26019	0.409524	0.0460744	0.00550019	0.0857259	0.104125	0.124165	0.12398	0.92199	0.648709	0.783405	0.234048	0.494865	0.734018	0.459937	0.999752	0.49915
ENSFDAG00000005175	2.21696	-0.631636	-0.209551	0.113975	-0.511997	-0.535452	-0.720379	0.805239	0.117483	0.0104821	0.183716	0.22951	0.263899	0.265806	0.0134902	0.0653569	0.0406827	0.790308	0.285193	0.297263	0.162334	0.999752	0.362253
ENSFDAG00000005178	0.355446	-0.0288717	-0.0308325	-0.134624	-0.0779117	-0.062324	-0.297601	0.0626008	0.0166745	0.000732776	0.0187374	0.0245898	0.0263463	0.0272275	0.155422	0.823079	0.254704	0.325369	0.619295	0.701002	0.0713008	0.999752	0.298112
ENSFDAG00000005180	0.216378	-0.145134	-0.0105316	-0.38968	-0.147685	-0.0355782	0.336532	0.0997733	0.0265758	0.0011679	0.0298636	0.0391913	0.0419908	0.0433953	0.493329	0.373315	0.757953	0.0241364	0.455664	0.862162	0.106204	0.999752	0.323246
ENSFDAG00000005184	1.12051	-0.18006	-0.146814	1.20788	-0.1855	0.596165	0.888257	1.31541	0.212607	0.01687	0.311963	0.39392	0.446729	0.45151	0.32858	0.696162	0.258333	0.030574	0.767568	0.372416	0.186195	0.999752	0.377174
ENSFDAG00000005186	0.0574202	-0.0879916	-0.00185321	0.121937	-0.0412197	-0.0228847	0.107247	0.0702042	0.0138365	0.000870825	0.0180956	0.0232932	0.0257622	0.0262189	0.828433	0.454432	0.949926	0.364691	0.7871	0.886623	0.507758	0.999752	0.515096
ENSFDAG00000005188	0.91743	0.0425752	-0.0859528	-0.284957	0.0523288	-0.211616	-0.260831	0.611234	0.0439029	0.00851611	0.114452	0.132559	0.168146	0.165524	0.240611	0.838984	0.351643	0.39962	0.885717	0.605809	0.521456	0.999752	0.520812
ENSFDAG00000005195	0.788575	-0.0231883	-0.085985	-0.20789	-0.287836	-0.810318	0.325044	0.612319	0.122292	0.00757686	0.158775	0.20462	0.225954	0.230073	0.313573	0.947132	0.323241	0.601861	0.524572	0.0882522	0.49799	0.999752	0.511953
ENSFDAG00000005196	0.173695	-0.0353336	-0.0113087	-0.167384	-0.038415	-0.16331	0.00404548	0.0547078	0.00908942	0.000698624	0.0131169	0.0166095	0.0187679	0.0189865	0.457715	0.710926	0.668761	0.143879	0.765648	0.233229	0.976578	0.999752	0.670438
ENSFDAG00000005197	-0.903701	-0.118613	0.120588	0.206829	-0.177396	0.868612	0.0230877	0.83923	0.0898729	0.0113278	0.173154	0.209189	0.251196	0.250413	0.323902	0.692358	0.257211	0.619158	0.69812	0.0830809	0.963201	0.999752	0.666692
ENSFDAG00000005198	-0.34748	-0.185977	0.0505518	-0.0339666	0.206068	-0.138167	-0.034403	0.161611	0.0306622	0.00201843	0.0409604	0.0525426	0.0583795	0.0593322	0.387391	0.2882	0.260504	0.866717	0.368657	0.567431	0.887682	0.999752	0.647453
ENSFDAG00000005210	-0.135827	0.0723677	-0.00331947	0.112338	0.0820789	0.138527	0.288533	0.046494	0.0062945	0.000611264	0.0103298	0.0128018	0.014873	0.0149429	0.528744	0.361692	0.893195	0.269029	0.468189	0.256004	0.0182574	0.999752	0.251789
ENSFDAG00000005213	0.00681191	-0.472092	0.0401312	-0.399652	-0.0866014	-0.200628	0.0454706	0.371451	0.0567843	0.00480351	0.0862267	0.108252	0.123683	0.124773	0.991082	0.0475771	0.562568	0.173511	0.792387	0.568357	0.897573	0.999752	0.649622
ENSFDAG00000005214	-0.212875	0.0310124	0.0252097	0.494225	-0.850735	0.246017	-0.325288	1.13999	0.27622	0.0135892	0.324466	0.42419	0.458642	0.471014	0.841968	0.952946	0.828787	0.385591	0.19148	0.716404	0.635522	0.999752	0.563827
ENSFDAG00000005216	0.640703	-0.348351	-0.0208862	-1.19492	0.170811	-1.4554	0.416202	0.667119	0.177695	0.00780899	0.199679	0.262047	0.280765	0.290156	0.432787	0.40859	0.813159	0.00749389	0.738624	0.00601977	0.439724	0.999752	0.491237
ENSFDAG00000005217	-0.386506	-0.198445	0.0517412	-0.0673642	-0.030631	0.211158	0.30723	0.0362889	0.00771681	0.000443776	0.00968618	0.0125493	0.0137579	0.014043	0.0424644	0.0238821	0.0140435	0.49368	0.78452	0.0718223	0.00952555	0.999752	0.228594
ENSFDAG00000005220	-0.0029431	0.381116	-0.0531954	1.07826	-0.0466978	0.773099	-0.696289	1.73046	0.196402	0.0232201	0.363192	0.441562	0.525894	0.525264	0.998215	0.389805	0.727019	0.0735848	0.943975	0.286392	0.336689	0.999752	0.449106
ENSFDAG00000005227	0.455269	-0.103375	-0.0612907	0.412504	0.0599213	-0.125628	-0.358557	0.467972	0.0695381	0.00607626	0.107488	0.134542	0.154315	0.155525	0.505721	0.695045	0.431705	0.208321	0.870233	0.749117	0.363246	0.999752	0.460054
ENSFDAG00000005229	-0.139172	-0.00358962	0.00913522	0.180645	0.0563422	-0.0967967	-0.141706	0.08999	0.0155568	0.00114189	0.0219261	0.0278752	0.0313356	0.0317435	0.642697	0.97704	0.7869	0.22248	0.735769	0.584505	0.426409	0.999752	0.485309
ENSFDAG00000005230	-0.504903	0.307131	0.0385893	0.288239	0.017742	0.0891985	-0.39491	0.127847	0.0175584	0.00167774	0.0285463	0.0354322	0.0410827	0.0412957	0.157923	0.0204589	0.346132	0.088009	0.924907	0.659882	0.0519768	0.999752	0.280035
ENSFDAG00000005236	0.510889	0.0492404	-0.0502796	-0.20624	-0.284071	-0.0937745	-0.0444941	0.148307	0.0158379	0.00200238	0.0305748	0.0369265	0.0443593	0.044217	0.184635	0.6956	0.261175	0.238207	0.139333	0.656148	0.832422	0.999752	0.631539
ENSFDAG00000005237	-1.29006	-0.239956	0.123835	0.676071	0.58626	-0.0822806	-0.668887	1.33048	0.206159	0.0171715	0.310435	0.390282	0.445105	0.449229	0.263385	0.597164	0.344651	0.224974	0.348025	0.901846	0.318292	0.999752	0.441345
ENSFDAG00000005241	1.01935	-0.2896	-0.102834	0.245553	-0.0212396	0.350054	-0.684415	1.06977	0.138283	0.0141455	0.233978	0.288524	0.337379	0.33844	0.324353	0.43611	0.387246	0.611705	0.968458	0.546732	0.23941	0.999752	0.402876
ENSFDAG00000005242	-0.0601619	0.670335	-0.0498214	-0.144073	-0.127438	0.662558	-0.245431	0.884413	0.0939778	0.0119468	0.18207	0.219775	0.264198	0.263307	0.948992	0.0287679	0.648522	0.735629	0.785747	0.197391	0.632439	0.999752	0.562478
ENSFDAG00000005244	0.265438	-0.129919	-0.0351058	0.308128	0.118575	0.287731	0.137097	0.272971	0.0478997	0.00345524	0.066921	0.0852041	0.0955979	0.0968922	0.61142	0.552768	0.550355	0.233612	0.68458	0.352061	0.659621	0.999752	0.573699
ENSFDAG00000005249	0.805708	-0.189477	-0.0702633	0.0668542	-0.305591	-0.150471	-0.370074	0.406515	0.0449308	0.00546976	0.0846485	0.102617	0.122675	0.12242	0.206342	0.37138	0.34209	0.81826	0.340103	0.66748	0.290193	0.999752	0.429496
ENSFDAG00000005255	0.790985	-0.0744789	-0.0729021	-0.289472	-0.0998547	-0.0519648	0.30916	0.13518	0.0165803	0.00179855	0.0290636	0.0356352	0.0419781	0.0420364	0.0314482	0.562986	0.0856121	0.089512	0.596828	0.799783	0.131582	0.999752	0.343094
ENSFDAG00000005256	-0.221274	0.0943219	0.0215482	-0.19203	-0.00123207	0.152696	0.339118	0.0522824	0.00975678	0.00065488	0.0131561	0.0168501	0.01876	0.0190549	0.333182	0.339627	0.399768	0.0940927	0.992427	0.26492	0.0140228	0.999752	0.234484
ENSFDAG00000005257	0.00421784	-0.0588599	-0.00438681	0.00768265	0.104763	0.07182	0.327638	0.0585907	0.0156063	0.000685836	0.0175371	0.0230146	0.0246586	0.0254834	0.986097	0.637526	0.866969	0.953738	0.489839	0.64741	0.0401293	0.999752	0.270694
ENSFDAG00000005260	0.332033	-0.0734468	-0.039248	0.0806115	0.0625518	0.0702514	0.0843813	0.0398822	0.010151	0.000470869	0.0116472	0.0152631	0.0164235	0.0169168	0.0963902	0.466011	0.0704968	0.4551	0.612638	0.583569	0.51649	0.999752	0.518291
ENSFDAG00000005263	1.38226	-0.62308	-0.12289	-0.176903	0.344428	0.260885	-0.424129	0.617153	0.0899583	0.00803475	0.140757	0.175825	0.202196	0.20365	0.0784895	0.0377633	0.17038	0.637269	0.411415	0.561793	0.347298	0.999752	0.452628
ENSFDAG00000005265	-0.297348	0.147135	0.0158855	0.0845777	0.212959	0.173245	0.210852	0.10502	0.0279733	0.00122931	0.031434	0.0412522	0.0441989	0.0456772	0.358855	0.379011	0.650496	0.633333	0.294404	0.40991	0.323853	0.999752	0.442798
ENSFDAG00000005268	-0.1758	-0.0227719	0.0204943	-0.17692	0.132307	-0.00743047	0.232259	0.0394613	0.00811817	0.000485612	0.0103717	0.0134007	0.0147468	0.0150326	0.376167	0.800471	0.352366	0.0823508	0.253068	0.951209	0.0581814	0.999752	0.286433
ENSFDAG00000005270	0.602798	-0.340808	-0.0306716	-0.712307	-0.0154261	-0.164855	-0.314458	0.82106	0.218699	0.00961095	0.245755	0.322515	0.345553	0.357111	0.505891	0.466147	0.754386	0.150757	0.97833	0.779138	0.598741	0.999752	0.550301
ENSFDAG00000005271	0.204773	0.0271945	-0.0115812	-0.145379	-0.374468	-0.0585492	-0.0530407	0.107075	0.0190162	0.00135263	0.0263821	0.0336294	0.0376741	0.0382	0.531453	0.843667	0.752843	0.370759	0.0411516	0.762921	0.786099	0.999752	0.61676
ENSFDAG00000005277	-0.432517	0.133825	0.0264162	0.169228	0.161743	0.0848876	0.244854	0.170806	0.0273422	0.00219378	0.0403561	0.0509076	0.0578062	0.0584059	0.295316	0.418332	0.572759	0.399564	0.473461	0.724038	0.310983	0.999752	0.438719
ENSFDAG00000005281	-0.5751	0.232457	0.0585601	0.0479434	0.00423419	-0.126578	-0.229374	0.103176	0.0203134	0.00128006	0.0265818	0.0342135	0.0378449	0.0385143	0.0733871	0.102893	0.10168	0.768712	0.981737	0.515266	0.242493	0.999752	0.404424
ENSFDAG00000005284	-0.210932	0.0329074	0.00706546	0.406292	0.137164	-0.0397964	-0.026034	0.0542423	0.00623979	0.000726811	0.0114309	0.013918	0.0165445	0.0165321	0.365108	0.676978	0.793262	0.000144626	0.24497	0.757019	0.839544	0.999752	0.633515
ENSFDAG00000005285	0.968	-0.16458	-0.119095	0.91796	-0.00820057	0.43487	0.218291	1.17019	0.157846	0.0153918	0.259661	0.321673	0.373906	0.375618	0.370871	0.678694	0.337082	0.0716331	0.988464	0.476974	0.72171	0.999752	0.594658
ENSFDAG00000005286	-0.189956	0.271335	0.00380686	-0.0763015	0.152936	0.0519954	0.162498	0.0588331	0.0122883	0.000721932	0.0155722	0.0201456	0.0221308	0.022573	0.433542	0.0143768	0.88733	0.540905	0.281255	0.726702	0.279445	0.999752	0.424518
ENSFDAG00000005292	-0.189893	-0.0335449	0.0111584	0.0942313	0.313995	0.0663931	-0.0391719	0.107876	0.0214129	0.00133637	0.0278948	0.0359296	0.0397046	0.0404191	0.563157	0.818683	0.760184	0.572618	0.0976163	0.738985	0.845517	0.999752	0.635251
ENSFDAG00000005295	-0.926304	0.280031	0.114827	-0.305474	-0.165722	-0.279441	-0.457133	0.155218	0.0275162	0.00196139	0.0382148	0.048704	0.0545743	0.0553327	0.0187149	0.0913818	0.00952106	0.118138	0.452697	0.231628	0.0519734	0.999752	0.280035
ENSFDAG00000005298	0.131449	-0.129156	-0.00420833	-0.109817	0.0748555	-0.0116408	-0.19157	0.149594	0.0312477	0.00183562	0.0395966	0.0512259	0.0562733	0.0573981	0.733963	0.464998	0.921754	0.581035	0.740845	0.960862	0.423936	0.999752	0.484538
ENSFDAG00000005299	-0.757802	-0.205552	0.115604	-0.1428	-0.362585	0.0614742	-0.00102635	0.399915	0.0446382	0.00537554	0.0835169	0.101354	0.120996	0.120784	0.230793	0.330603	0.114855	0.621215	0.25474	0.859721	0.997644	0.999752	0.675072
ENSFDAG00000005300	0.720581	-0.265821	-0.0733277	0.240571	-0.0361898	-0.0109757	-0.252806	0.29549	0.053419	0.0037216	0.0733516	0.0936633	0.104693	0.10622	0.184973	0.250096	0.229365	0.374404	0.90587	0.97294	0.437937	0.999752	0.490689
ENSFDAG00000005301	0.253737	0.0855928	-0.0646122	0.732032	0.466667	0.296657	-0.40345	0.516914	0.0526051	0.00701133	0.105133	0.126312	0.152771	0.15204	0.72415	0.709011	0.440328	0.0239665	0.189162	0.447861	0.300814	0.999752	0.434271
ENSFDAG00000005302	0.287328	-0.143901	-0.0367904	0.612016	0.129919	-0.0444469	-0.470249	0.439738	0.0619686	0.00575122	0.0990809	0.123321	0.142478	0.143341	0.664802	0.56322	0.627587	0.0518569	0.711414	0.906264	0.214214	0.999752	0.390576
ENSFDAG00000005306	0.629969	-0.109408	-0.0635597	0.0710167	0.0345187	-0.302004	-0.2819	0.127597	0.026422	0.00156828	0.033638	0.0434858	0.0478181	0.0487571	0.0778004	0.500895	0.108498	0.698601	0.868526	0.167257	0.201722	0.999752	0.385703
ENSFDAG00000005308	-0.867723	0.434525	0.0813342	1.39319	-0.457548	-1.20391	-0.767338	1.05637	0.235178	0.0128041	0.288217	0.374732	0.408752	0.418032	0.398527	0.370244	0.472275	0.00945693	0.454798	0.0596921	0.235301	0.999752	0.400726
ENSFDAG00000005310	-0.739969	0.0643205	0.0839606	-0.474797	-0.0347578	0.232348	0.606909	0.166012	0.0442191	0.00194326	0.0496898	0.0652099	0.069868	0.0722049	0.0693521	0.7597	0.0568281	0.0331735	0.891733	0.379389	0.023908	0.999752	0.255044
ENSFDAG00000005312	4.16743	-1.90096	-0.330711	-0.146665	-0.68533	0.268598	1.07888	4.39245	0.605352	0.057616	0.981954	1.21928	1.41304	1.42053	0.0467617	0.0145555	0.168274	0.882338	0.534828	0.821235	0.365353	0.999752	0.461169
ENSFDAG00000005320	0.841444	0.0629822	-0.0883536	0.149569	-0.641454	-0.0222995	-0.467542	0.162427	0.0432644	0.0019013	0.0486169	0.0638019	0.0683593	0.0706458	0.0368129	0.762044	0.0427361	0.497555	0.011101	0.932031	0.0785698	0.999752	0.30267
ENSFDAG00000005325	0.392152	0.0189573	-0.0452366	-0.0152717	-0.0404868	0.0289442	-0.118544	0.0331152	0.00774212	0.000397545	0.00925587	0.0120749	0.0131031	0.0134313	0.0311646	0.829417	0.0232805	0.873876	0.712541	0.800379	0.306368	0.999752	0.436654
ENSFDAG00000005340	0.524225	0.159915	-0.05979	-0.0372849	0.11159	0.0955382	0.080359	0.490296	0.0503312	0.0066449	0.0999593	0.120208	0.145212	0.144558	0.454058	0.475966	0.46327	0.906124	0.747563	0.802036	0.83261	0.999752	0.631539
ENSFDAG00000005341	1.03204	-0.0273947	-0.0898368	-0.263276	-0.28248	-0.840321	0.00937685	0.471721	0.0710525	0.00611318	0.108896	0.1365	0.156271	0.157569	0.132932	0.918144	0.250555	0.424975	0.444523	0.0335267	0.981154	0.999752	0.671421
ENSFDAG00000005342	-0.50821	-0.0349031	0.0671015	-0.348314	0.0968491	-0.0743022	0.0363533	0.0858324	0.0228625	0.00100472	0.0256909	0.0337153	0.0361236	0.0373319	0.0827987	0.817443	0.0342641	0.0297723	0.59788	0.695844	0.850759	0.999752	0.636491
ENSFDAG00000005349	0.442729	-0.00485375	-0.0419467	-0.130489	-0.0489638	-0.11088	-0.0886601	0.059773	0.0074888	0.000793318	0.0129396	0.0159021	0.0186766	0.0187158	0.0701622	0.955272	0.136416	0.251328	0.697807	0.41717	0.516937	0.999752	0.518695
ENSFDAG00000005350	2.26103	-0.615269	-0.214783	-0.520098	-1.23525	-1.11335	-2.14353	1.73747	0.0986966	0.0245259	0.311968	0.353219	0.461395	0.451229	0.0862847	0.0501764	0.170228	0.351764	0.0376713	0.101199	0.00141765	0.999752	0.204207
ENSFDAG00000005352	0.593983	-1.29311	0.0118114	-0.801532	0.26869	-0.651693	0.717124	0.815153	0.217126	0.00954181	0.243988	0.320195	0.343067	0.354542	0.510608	0.00551827	0.903757	0.104654	0.634903	0.265864	0.228446	0.999752	0.396902
ENSFDAG00000005357	-0.011852	0.119183	-0.00650603	-0.020882	0.0364634	0.0639018	0.157039	0.0614405	0.00814083	0.00080996	0.0135504	0.0167541	0.0195233	0.0196009	0.961864	0.186526	0.819177	0.857632	0.778168	0.647428	0.261999	0.999752	0.416332
ENSFDAG00000005359	0.579114	-0.119459	-0.0566335	0.0907237	-0.319237	-6.28871e-05	0.12975	0.0948395	0.023612	0.00112453	0.0273762	0.0358404	0.0386475	0.0397526	0.0600421	0.436914	0.0912505	0.583472	0.0917439	0.999745	0.515199	0.999869	0.51765
ENSFDAG00000005361	-0.0581483	0.0238197	0.00934396	0.150771	-0.0405581	-0.195494	-0.756562	0.355058	0.0214728	0.00499608	0.0644057	0.0733504	0.0950921	0.0931531	0.922261	0.870871	0.89483	0.55245	0.880959	0.526107	0.0131816	0.999752	0.234484
ENSFDAG00000005365	0.806163	0.155198	-0.0746066	-0.250841	-0.329219	-0.370333	-1.05456	0.468312	0.12474	0.00548184	0.140173	0.183954	0.197095	0.203687	0.238786	0.660356	0.313618	0.502867	0.442731	0.404185	0.0194581	0.999752	0.252487
ENSFDAG00000005366	0.241531	-0.185366	-0.0178368	0.107322	-0.0727064	-0.113794	0.0904144	0.195534	0.0478104	0.00232671	0.0559146	0.0731358	0.0790042	0.0811769	0.584921	0.396576	0.711545	0.649926	0.788046	0.685587	0.750988	0.999752	0.604214
ENSFDAG00000005375	-0.390719	0.240111	0.0269326	0.151047	-0.0405394	0.197577	-0.0666998	0.255196	0.0579056	0.0030817	0.0702775	0.0914977	0.0996009	0.10195	0.439262	0.318367	0.627565	0.568829	0.893386	0.531286	0.834529	0.999752	0.632168
ENSFDAG00000005376	1.17791	0.593822	-0.159859	-0.437631	-0.0899908	0.369818	0.063664	0.715577	0.182136	0.00844841	0.20898	0.273859	0.294678	0.303529	0.163781	0.164098	0.0820003	0.338407	0.863467	0.495706	0.908004	0.999752	0.653073
ENSFDAG00000005380	-0.224836	0.00308617	0.0199257	0.0925833	0.0771555	0.125312	0.112539	0.0810407	0.0215861	0.000948625	0.0242567	0.031833	0.0341069	0.0352477	0.429647	0.983241	0.517669	0.55221	0.66542	0.497434	0.548886	0.999752	0.532174
ENSFDAG00000005382	0.621638	0.451847	-0.086693	0.0132269	0.228184	0.368849	-0.371158	0.381904	0.0376515	0.0051951	0.0770072	0.0922023	0.112016	0.111364	0.314458	0.0198787	0.229061	0.961984	0.452366	0.270431	0.266048	0.999752	0.418223
ENSFDAG00000005384	-0.0985954	-0.00414035	0.016348	-0.417023	0.140482	-0.00955401	-0.0267692	0.115015	0.0136384	0.00153606	0.0244657	0.0298874	0.0353755	0.0353847	0.771263	0.971718	0.676591	0.00767294	0.416446	0.959488	0.886837	0.999752	0.647439
ENSFDAG00000005386	-0.612163	-0.121956	0.059507	0.214129	-0.166475	0.24555	0.875618	0.326028	0.054762	0.00415624	0.0785122	0.0995272	0.1123	0.113651	0.283671	0.602262	0.355989	0.444747	0.597714	0.463719	0.00939491	0.999752	0.228594
ENSFDAG00000005388	-1.2781	0.132118	0.113632	0.877163	-0.0511666	0.561035	0.355401	0.46801	0.12466	0.00547832	0.140083	0.183836	0.196968	0.203556	0.0617264	0.708259	0.124723	0.0190973	0.905009	0.206182	0.430855	0.999752	0.486337
ENSFDAG00000005391	0.549594	-0.115795	-0.0598435	0.218097	-0.0154488	-0.0183651	-0.0675419	0.0810847	0.0126884	0.00104498	0.0189904	0.0238994	0.0272206	0.0274819	0.0535985	0.303958	0.0641356	0.113504	0.920399	0.911369	0.683694	0.999752	0.581927
ENSFDAG00000005393	-0.245679	-0.0588499	0.0153318	-0.0122136	0.168811	-0.113064	0.420944	0.182462	0.0236068	0.00241242	0.0399197	0.0492306	0.0575595	0.0577423	0.56519	0.701701	0.754926	0.951256	0.446764	0.63745	0.0798133	0.999752	0.30372
ENSFDAG00000005395	-0.308416	0.213468	0.00687226	0.0322992	0.301742	0.146679	-0.12052	0.0885375	0.0105885	0.00118134	0.0188837	0.0230899	0.0272969	0.0273118	0.299964	0.0380318	0.841523	0.814175	0.0470606	0.374653	0.465842	0.999752	0.501335
ENSFDAG00000005401	0.776031	-0.0485155	-0.0598745	-0.409911	-0.297185	-0.144522	-0.184081	0.109809	0.014182	0.00145214	0.0240102	0.0296048	0.0346219	0.0347298	0.019188	0.683721	0.116132	0.00815946	0.0841292	0.437331	0.323262	0.999752	0.442798
ENSFDAG00000005402	-0.215582	-0.311771	0.0494473	0.0142996	-0.109274	-0.229988	-0.230724	0.10449	0.0278322	0.00122311	0.0312754	0.041044	0.0439759	0.0454468	0.504822	0.0616513	0.1574	0.935555	0.589626	0.272762	0.279126	0.999752	0.424518
ENSFDAG00000005403	2.12621	-1.07903	-0.164198	-0.0367966	-0.408663	0.159428	0.622628	0.947874	0.100004	0.0128129	0.194738	0.234883	0.282646	0.281626	0.0289703	0.000644566	0.146895	0.933546	0.399107	0.764271	0.240694	0.999752	0.403106
ENSFDAG00000005404	-0.0938225	-0.0810122	0.00974399	0.0349507	0.15559	-0.261757	0.592546	1.01803	0.271165	0.0119166	0.304712	0.399886	0.428451	0.442782	0.925913	0.87637	0.928875	0.949515	0.805648	0.689233	0.373205	0.999752	0.463939
ENSFDAG00000005405	-0.775252	0.290927	0.0778299	0.0264089	0.124596	0.0457792	-0.801072	0.488791	0.0774831	0.00628718	0.115048	0.144983	0.164844	0.166499	0.267486	0.295952	0.326315	0.93794	0.743498	0.910226	0.0496227	0.999752	0.277854
ENSFDAG00000005406	0.480408	-0.135568	-0.0393378	0.0284691	-0.255225	-0.346435	-0.150492	0.192434	0.0512572	0.00225255	0.0575985	0.0755888	0.0809883	0.0836972	0.273456	0.549309	0.407193	0.905574	0.353245	0.223476	0.602933	0.999752	0.551898
ENSFDAG00000005407	-0.229699	0.0409953	0.0217654	-0.0405693	-0.00323095	0.0643594	0.246142	0.0570273	0.00828462	0.000742784	0.0129905	0.0162213	0.0186628	0.0187949	0.336113	0.652423	0.424517	0.721881	0.979761	0.637561	0.0725876	0.999752	0.298915
ENSFDAG00000005408	0.526839	-0.560036	-0.0247995	0.242124	0.0498368	0.155664	-0.354088	0.371411	0.0544312	0.00483181	0.0848763	0.106083	0.121904	0.122803	0.387329	0.016375	0.721264	0.405927	0.878389	0.655713	0.312289	0.999752	0.439492
ENSFDAG00000005415	4.81984	-1.1103	-0.396504	-0.798819	-3.54955	0.0623182	0.112902	3.71266	0.478161	0.0491138	0.811038	0.999714	1.16959	1.17313	0.012369	0.108348	0.0735912	0.375074	0.000385146	0.954049	0.91698	0.999752	0.655013
ENSFDAG00000005422	-0.76939	0.026124	0.085971	-0.367502	0.222382	0.132093	0.45612	0.090294	0.0240509	0.00105694	0.0270263	0.0354678	0.0380013	0.0392724	0.0104535	0.866228	0.00818361	0.0253874	0.237676	0.498017	0.0213559	0.999752	0.253078
ENSFDAG00000005423	0.166117	-0.0635127	-0.00576167	-0.198313	-0.0708331	-0.199812	-0.187979	0.0841135	0.0224046	0.000984594	0.0251764	0.0330401	0.0354002	0.0365842	0.5668	0.671334	0.854312	0.211358	0.696768	0.288243	0.32571	0.999752	0.443304
ENSFDAG00000005424	-0.0561639	0.0197568	0.00987599	-0.192742	0.0385207	-0.0181646	0.18828	0.0590336	0.00827353	0.000772647	0.0132754	0.0165136	0.0190934	0.0192054	0.817192	0.828048	0.722368	0.09436	0.764361	0.895414	0.174273	0.999752	0.368586
ENSFDAG00000005429	0.171049	0.0517336	-0.0385817	-0.0659609	0.123839	0.0875017	0.13838	0.150959	0.0144697	0.00205862	0.0302131	0.0360651	0.0439883	0.0436925	0.659761	0.667142	0.395135	0.704332	0.514336	0.67653	0.507959	0.999752	0.515171
ENSFDAG00000005430	0.364013	-0.211903	-0.0297005	-0.0722649	-0.0795904	-0.148991	0.160605	0.113068	0.0261977	0.00135979	0.0314612	0.0410191	0.0445537	0.0456496	0.279009	0.190467	0.42057	0.683701	0.694336	0.480275	0.452235	0.999752	0.4959
ENSFDAG00000005431	0.829395	-0.0445146	-0.0777833	-0.113762	-0.177328	0.147507	0.242115	0.141751	0.0109576	0.00196545	0.026952	0.0314505	0.039508	0.0389777	0.0276005	0.670654	0.0793435	0.488343	0.317351	0.458018	0.220068	0.999752	0.393906
ENSFDAG00000005432	-1.00866	0.378634	0.109683	-0.299076	0.0478193	0.00634677	-0.110177	0.230487	0.0378232	0.00294905	0.0549906	0.0695453	0.0787105	0.0795938	0.0356432	0.0515481	0.0434097	0.202176	0.856109	0.981952	0.696147	0.999752	0.586978
ENSFDAG00000005433	-0.0888278	0.0377623	0.00185485	0.224493	0.102584	0.0886004	-0.0374783	0.0211545	0.00355346	0.000269677	0.00509441	0.00645805	0.00728682	0.00737444	0.54138	0.52642	0.91007	0.00165943	0.201771	0.299304	0.662524	0.999752	0.574505
ENSFDAG00000005436	-0.686004	0.389547	0.0359015	0.336313	0.240897	0.260004	0.01933	0.152635	0.0137414	0.00209247	0.0300646	0.0356477	0.0438603	0.0434777	0.0791059	0.000890231	0.432546	0.0524262	0.201992	0.214424	0.926139	0.999752	0.657079
ENSFDAG00000005440	-0.124612	0.331858	-0.0328021	0.632097	0.173726	0.459398	0.0469861	0.483096	0.0845185	0.00611799	0.118288	0.150561	0.168992	0.171262	0.857715	0.253661	0.674946	0.0660823	0.654353	0.263771	0.909605	0.999752	0.653347
ENSFDAG00000005444	0.339529	-0.125632	-0.0232074	0.0421787	-0.311651	-0.0840345	-0.282503	0.202988	0.0494142	0.00241751	0.0579139	0.075733	0.0818457	0.0840755	0.451089	0.571964	0.636927	0.860869	0.257437	0.768959	0.329912	0.999752	0.445693
ENSFDAG00000005445	-0.0559176	-0.0060249	0.0135555	-0.190005	0.12551	-0.218383	-0.173419	0.0762758	0.020317	0.00089285	0.0228305	0.0299614	0.0321016	0.0331753	0.839551	0.966284	0.650077	0.208574	0.468392	0.222895	0.341039	0.999752	0.450219
ENSFDAG00000005447	0.0960009	0.0609509	-0.0129618	-0.0250751	0.00193757	-0.00109691	-0.0375071	0.0222773	0.00461396	0.000273797	0.00587342	0.00759304	0.00834931	0.00851334	0.520096	0.369553	0.433426	0.743526	0.98226	0.990422	0.684374	0.999752	0.581927
ENSFDAG00000005449	0.493099	0.0938627	-0.0617235	0.383041	-0.673043	0.446684	-0.836641	1.17808	0.193285	0.0150738	0.281049	0.355428	0.40228	0.406792	0.64961	0.830939	0.615151	0.46997	0.258927	0.481268	0.189602	0.999752	0.378428
ENSFDAG00000005458	0.325364	-0.0988141	-0.0232191	-0.14061	0.0432958	0.0260505	0.0127912	0.144782	0.0220881	0.00187283	0.0335831	0.0421525	0.0481746	0.0485955	0.392501	0.50613	0.59159	0.442913	0.832981	0.905523	0.953729	0.999752	0.664633
ENSFDAG00000005461	-0.268923	-0.323895	0.00249014	0.577982	-0.0441875	0.0335911	0.117987	1.29603	0.144487	0.0174231	0.270562	0.328304	0.391995	0.391294	0.813261	0.39416	0.984949	0.266495	0.938529	0.957213	0.850393	0.999752	0.636491
ENSFDAG00000005463	-0.364868	0.00187081	0.0548236	-0.402804	-0.172428	0.070801	0.381154	0.151955	0.0176391	0.00203412	0.0321113	0.0391364	0.0464626	0.0464417	0.34927	0.988761	0.224149	0.0245867	0.383426	0.742561	0.0769494	0.999752	0.301965
ENSFDAG00000005465	0.346184	-0.0462484	-0.0383264	0.0969694	-0.152198	0.0945928	0.014946	0.0651423	0.00851615	0.000860186	0.0143017	0.0176574	0.0206146	0.0206873	0.174984	0.61626	0.191288	0.417452	0.252055	0.510008	0.917238	0.999752	0.655013
ENSFDAG00000005472	-0.0674653	0.123884	0.00906509	-0.324165	0.258551	-0.182482	-0.268736	0.0862747	0.0229803	0.00100989	0.0258233	0.033889	0.0363097	0.0375242	0.818334	0.413803	0.775448	0.0436692	0.160174	0.338237	0.165351	0.999752	0.364421
ENSFDAG00000005473	-0.205303	0.0694528	0.0245434	-0.0493765	0.0359815	-0.124759	-0.15293	0.0430262	0.00941545	0.000523267	0.011642	0.0151172	0.0165205	0.0168829	0.322293	0.474138	0.2833	0.647225	0.769792	0.331724	0.239205	0.999752	0.402707
ENSFDAG00000005474	-0.219508	0.284318	0.0265818	-0.254727	0.368523	-0.442304	-1.10085	0.490896	0.130756	0.00574621	0.146933	0.192826	0.2066	0.21351	0.754055	0.431708	0.725839	0.506349	0.401339	0.330505	0.0171987	0.999752	0.248038
ENSFDAG00000005476	-0.437827	0.139105	0.013502	0.431526	0.394184	0.169435	0.173339	0.24024	0.0271159	0.0032255	0.050338	0.0611632	0.0729015	0.0728008	0.371716	0.398247	0.812084	0.0544358	0.110964	0.530313	0.520592	0.999752	0.520457
ENSFDAG00000005477	0.416228	0.100578	-0.0230164	-0.520997	0.298033	-1.25099	-0.618806	0.830773	0.221286	0.00972465	0.248663	0.32633	0.349641	0.361336	0.647917	0.830697	0.815451	0.296119	0.601867	0.0343747	0.303275	0.999752	0.435635
ENSFDAG00000005480	2.92494	-0.691345	-0.248492	-0.421176	-1.27922	-0.787246	-0.606728	0.807975	0.0900626	0.0108621	0.168667	0.204659	0.244369	0.24393	0.00113792	0.0212406	0.0171132	0.305113	0.00468878	0.111266	0.219274	0.999752	0.393554
ENSFDAG00000005481	-0.116678	0.115737	0.000459291	0.0986685	0.121314	0.00312422	-0.0996762	0.104839	0.0184563	0.00132633	0.0257366	0.0327784	0.0367618	0.0372637	0.718583	0.394257	0.989938	0.538529	0.502817	0.986999	0.605607	0.999752	0.552539
ENSFDAG00000005483	1.34133	0.153235	-0.134298	0.798825	0.331948	-0.647861	-0.768434	1.1946	0.152662	0.0158179	0.260291	0.320573	0.375457	0.376494	0.219739	0.69492	0.285606	0.117408	0.557686	0.290371	0.210441	0.999752	0.389554
ENSFDAG00000005484	-0.341566	0.127928	0.00100947	0.451122	0.0168409	-0.0941727	-0.0654984	0.472889	0.0545477	0.00633456	0.0997389	0.121475	0.144344	0.144249	0.6194	0.583868	0.98988	0.153166	0.961462	0.804234	0.86308	0.999752	0.640092
ENSFDAG00000005485	-0.415321	0.131961	0.0349207	-0.113853	0.0261113	0.231444	0.382045	0.104099	0.0177086	0.00132437	0.0251976	0.0319829	0.036028	0.0364769	0.19801	0.321376	0.337269	0.473224	0.883917	0.222715	0.0454626	0.999752	0.275799
ENSFDAG00000005487	-0.253635	-0.225538	0.035708	-0.0965815	0.0786686	0.117221	0.394271	0.0615778	0.012203	0.000763056	0.0159113	0.0204914	0.0226487	0.0230549	0.30673	0.0411843	0.196125	0.443873	0.58262	0.436038	0.0094138	0.999752	0.228594
ENSFDAG00000005492	1.30616	-0.102177	-0.178061	0.87165	0.314837	0.051069	-0.33718	1.03565	0.15917	0.0133824	0.240896	0.302598	0.345485	0.34859	0.199323	0.797867	0.12375	0.0757433	0.567093	0.930763	0.567939	0.999752	0.539402
ENSFDAG00000005495	1.59712	-0.0626611	-0.190397	0.425496	0.0390418	0.00612207	-0.946537	1.80854	0.215907	0.0241358	0.38552	0.4713	0.557312	0.557582	0.234987	0.892727	0.220369	0.493164	0.954649	0.993457	0.20494	0.999752	0.387392
ENSFDAG00000005497	0.915716	-0.360255	-0.0905029	0.24992	0.0502252	-0.0916655	-0.503226	0.573302	0.0949733	0.00732449	0.137296	0.173802	0.196463	0.198731	0.22651	0.242409	0.290291	0.500003	0.904108	0.83616	0.258968	0.999752	0.414676
ENSFDAG00000005498	0.997132	0.168776	-0.137086	0.344118	-0.0788811	0.167123	-0.314382	0.445949	0.0692657	0.00575353	0.104146	0.130966	0.149315	0.150711	0.135392	0.521338	0.0707179	0.286282	0.827454	0.66538	0.418047	0.999752	0.482691
[truncated: 9,147 more rows]
