# Supplementary material for: Morphological and genomic shifts in mole-rat ‘queens’ increase fecundity but reduce skeletal integrity
Source: eLife. 2021 Apr 12;10:e65760. doi: 10.7554/eLife.65760 (PMC8104968; doi:10.7554/eLife.65760)
Supplement: Supplementary file 3. [file elife-65760-supp3.xlsx]

## Sheet: Table S3
Supplementary File 3. Results of multivariate model explaining litter size (first model) or pup mass (second model).
Explanatory variable	β (first model)	Standard error (first model)	p-value (first model)	β (second model)	Standard error (second model)	p-value (second model)
Intercept	0.6275	1.9806	0.75199	8.16473	2.39797	0.000896
Maternal body length	0.3532	0.1073	0.00135	0.28527	0.1313	0.031596
First litter	-0.4403	0.1819	0.01605	0.57376	0.2048	0.005405
Litter size	—		—	-0.48325	0.06139	6.98e-14
