# Supplementary material for: Morphological and genomic shifts in mole-rat ‘queens’ increase fecundity but reduce skeletal integrity
Source: eLife. 2021 Apr 12;10:e65760. doi: 10.7554/eLife.65760 (PMC8104968; doi:10.7554/eLife.65760)
Supplement: Supplementary file 4. — bone0 refers to long bones; bone1 refers to lumbar vertebrae. [file elife-65760-supp4.xlsx]

## Sheet: Table S4
Supplementary File 4. Results of mixed effects model of mole-rat gene expression data. bone0 refers to long bones; bone1 refers to lumbar vertebrae.
Gene	Gene_name	beta_.Intercept.	beta_bone1	beta_daysinculture	beta_queen_in_bone0	beta_queen_in_bone1	beta_E2_in_bone0	beta_E2_in_bone1	se_.Intercept.	se_bone1	se_daysinculture	se_queen_in_bone0	se_queen_in_bone1	se_E2_in_bone0	se_E2_in_bone1	p_val_.Intercept.	p_val_bone1	p_val_daysinculture	p_queen_in_bone0	p_queen_in_bone1	p_E2_in_bone0	p_E2_in_bone1	fdr_Queen_at_long_bones	fdr_Queen_at_lumbar_vertebrae
ENSFDAG00000000002	ENSFDAG00000000002	-0.0603646	0.512085	-0.0184056	-0.183611	0.186272	0.190498	-0.216824	0.306126	0.0709335	0.00339559	0.0792691	0.101422	0.0686052	0.0891522	0.913122	0.0545152	0.752109	0.514306	0.558615	0.467045	0.467732	0.789669	0.999844
ENSFDAG00000000035	CYTB	0.108158	0.302898	-0.0177816	0.215579	0.394138	-0.239966	-0.718935	0.23841	0.0552427	0.00264447	0.0617344	0.0789871	0.0534294	0.0694313	0.824694	0.197496	0.729506	0.385588	0.160798	0.299202	0.00636379	0.751364	0.999844
ENSFDAG00000000038	PPP1R11	0.00915816	-0.00301107	0.00136755	-0.020481	-0.0172154	0.0467729	-0.119495	0.0417709	0.00967887	0.000463328	0.0108163	0.0138391	0.00936118	0.0121648	0.964259	0.975584	0.949342	0.843882	0.883653	0.628794	0.278624	0.839052	0.999844
ENSFDAG00000000039	GPN3	-0.0738921	0.0682134	0.00363202	0.0259682	0.073906	-0.0323093	0.0301165	0.0206542	0.00478583	0.000229098	0.00534823	0.00684289	0.00462875	0.00601504	0.607143	0.324118	0.810362	0.722523	0.371627	0.634864	0.697783	0.826038	0.999844
ENSFDAG00000000040	ARL11	0.1098	-0.301727	-0.0486411	2.24851	1.28023	0.116056	0.0866207	1.51293	0.074463	0.0190866	0.264114	0.291042	0.0749657	0.0982714	0.92887	0.268849	0.72478	1.21e-05	0.0176408	0.671658	0.782304	0.0521789	0.814176
ENSFDAG00000000042	CLASP1	1.11932	-0.366368	-0.115151	-0.144569	0.119831	0.104639	0.184158	0.332441	0.0770309	0.00368747	0.086083	0.11014	0.0745025	0.0968156	0.05222	0.186823	0.0579232	0.622197	0.718045	0.701453	0.553945	0.809167	0.999844
ENSFDAG00000000044	SH3BGRL3	0.066724	-0.0817702	0.00121076	0.0131992	-0.152222	-0.0853509	-0.0308148	0.0675405	0.01565	0.000749167	0.0174891	0.0223767	0.0151363	0.0196696	0.797377	0.513344	0.964717	0.920497	0.308864	0.487844	0.826092	0.854799	0.999844
ENSFDAG00000000045	EML4	0.265412	-0.481961	-0.00677964	0.115133	-0.164956	-0.0782124	0.149859	0.0270597	0.00627009	0.00030015	0.00700691	0.00896511	0.00606429	0.00788052	0.106645	1.15e-09	0.695557	0.168998	0.081479	0.315209	0.0913873	0.66041	0.999844
ENSFDAG00000000048	MED12	0.379218	-0.349994	-0.0360574	0.219323	-0.0209235	0.101727	0.154535	0.243588	0.0564425	0.00270191	0.0630752	0.0807027	0.0545899	0.0709393	0.442277	0.140701	0.487882	0.38251	0.941287	0.663278	0.561775	0.749887	0.999844
ENSFDAG00000000049	CTBP1	1.60672	-0.503278	-0.192582	0.592415	0.798122	0.233749	-0.224865	0.925901	0.105432	0.0112051	0.188637	0.227024	0.10441	0.137107	0.0949641	0.12115	0.0688639	0.172569	0.0939199	0.469436	0.543662	0.662715	0.999844
ENSFDAG00000000051	CHMP4C	-1.30362	-0.520524	0.190888	-0.601798	-0.108408	-0.105046	0.11317	0.218388	0.0408258	0.00250201	0.0520516	0.0658129	0.0397883	0.0520102	0.00527796	0.00999035	0.000135507	0.00834575	0.672604	0.598453	0.619727	0.302239	0.999844
ENSFDAG00000000054	NRIP1	-0.00243036	0.142807	-0.00533495	-0.104119	0.241389	-0.0602263	-0.075961	0.0908482	0.0210507	0.0010077	0.0235244	0.0300988	0.0203598	0.0264574	0.993566	0.32498	0.866536	0.497235	0.164113	0.672963	0.6405	0.784754	0.999844
ENSFDAG00000000058	MYL4	-2.04977	0.247025	0.259523	-0.512201	-0.942758	-0.354628	-0.184182	0.638148	0.036801	0.00801099	0.113638	0.127135	0.0369713	0.0484904	0.0102902	0.197853	0.00373678	0.128655	0.00819225	0.0651337	0.402924	0.62706	0.619231
ENSFDAG00000000063	DHDDS	0.343787	-0.185696	-0.0340412	-0.0543111	0.113872	0.0717765	0.0584348	0.056631	0.0131221	0.000628158	0.0146642	0.0187623	0.0126914	0.0164925	0.148557	0.105004	0.174393	0.653794	0.405786	0.524041	0.649096	0.816437	0.999844
ENSFDAG00000000064	SCRN1	-0.219922	0.576034	-0.00684715	0.286644	-0.124138	0.192255	-0.312941	0.264993	0.0614023	0.00293933	0.0686178	0.0877943	0.0593869	0.077173	0.669219	0.0200912	0.899499	0.273837	0.675246	0.430158	0.259955	0.726395	0.999844
ENSFDAG00000000068	ENSFDAG00000000068	-0.16601	0.00712092	0.0145832	0.121616	-0.026967	0.0767835	0.00712284	0.0561281	0.0130056	0.00062258	0.0145339	0.0185957	0.0125787	0.016346	0.483479	0.950212	0.558912	0.313077	0.843237	0.493584	0.955571	0.737181	0.999844
ENSFDAG00000000069	TGFBR1	0.2124	-0.21666	-0.0162535	-0.033753	0.190407	-0.141426	0.186835	0.160238	0.0371292	0.00177738	0.0414924	0.0530881	0.0359105	0.0466656	0.595693	0.260843	0.699846	0.868391	0.408583	0.455481	0.387101	0.842878	0.999844
ENSFDAG00000000079	PEX6	0.159284	-0.594469	0.00876766	0.0712001	-0.157736	-0.0600577	0.298163	0.2648	0.0613575	0.00293719	0.0685678	0.0877303	0.0593436	0.0771167	0.756912	0.016399	0.871481	0.785693	0.594348	0.805267	0.282962	0.834195	0.999844
ENSFDAG00000000091	CABCOCO1	-0.890387	0.460444	0.0862389	-0.238526	0.0505512	0.0372082	-0.157465	0.173906	0.0402964	0.00192899	0.0450317	0.0576166	0.0389737	0.0506462	0.0327517	0.0218055	0.0495843	0.261003	0.8332	0.850505	0.484117	0.71959	0.999844
ENSFDAG00000000093	TANC1	-0.233211	-0.181378	0.045412	-0.197612	0.11764	-0.200034	-0.0662108	0.121812	0.0282255	0.00135116	0.0315424	0.0403574	0.0272991	0.035475	0.504009	0.280318	0.216671	0.26585	0.558151	0.226017	0.725188	0.721339	0.999844
ENSFDAG00000000094	E2F5	-0.149531	0.135661	0.0107227	-0.127293	0.0639388	0.0552706	0.0176739	0.0639951	0.0148285	0.000709842	0.016571	0.0212021	0.0143418	0.0186371	0.554456	0.265255	0.687345	0.322739	0.660581	0.644424	0.896992	0.738579	0.999844
ENSFDAG00000000095	SBF2	0.185322	-0.376409	0.000531167	-0.0307776	-0.0596151	-0.298094	0.30191	0.0780185	0.0180779	0.00086539	0.0202023	0.0258481	0.0174845	0.0227211	0.507022	0.00511758	0.985594	0.828568	0.710785	0.0241724	0.0451861	0.838154	0.999844
ENSFDAG00000000101	MIR199A2	-1.37831	0.621418	0.123856	0.431914	-0.117421	-0.0196651	-0.147733	0.538053	0.124674	0.00596815	0.139325	0.178261	0.120582	0.156696	0.0602401	0.0784192	0.108882	0.247219	0.780928	0.954839	0.708994	0.714591	0.999844
ENSFDAG00000000103	SNX1	0.0706426	0.0839066	-0.0182575	0.150808	0.102575	0.00923514	0.021346	0.0238575	0.0055281	0.00026463	0.00617772	0.00790418	0.00534665	0.00694794	0.647416	0.259102	0.261722	0.0550213	0.248601	0.899495	0.797884	0.513731	0.999844
ENSFDAG00000000106	EIF4G2	-0.160933	-0.0561928	0.0276158	-0.200221	-0.0410926	-0.161554	0.16641	0.0630594	0.0146117	0.000699463	0.0163287	0.0208921	0.0141321	0.0183646	0.521608	0.642025	0.296402	0.117144	0.776183	0.174152	0.219456	0.613396	0.999844
ENSFDAG00000000107	KRAS	-0.367522	-0.0154288	0.0520023	-0.0650999	-0.0960207	-0.150961	-0.0944143	0.113145	0.0262172	0.00125502	0.0292981	0.0374859	0.0253567	0.0329509	0.274566	0.924086	0.142131	0.7037	0.619935	0.343119	0.60298	0.825209	0.999844
ENSFDAG00000000110	PRC1	0.437836	-0.207111	-0.044048	-0.168034	0.105226	-0.0171734	0.31401	0.0581124	0.0134654	0.000644589	0.0150477	0.0192531	0.0130234	0.0169239	0.0693313	0.0742913	0.0827514	0.170744	0.448237	0.880382	0.0157888	0.661749	0.999844
ENSFDAG00000000114	ENSFDAG00000000114	1.11003	-0.876	-0.104854	0.593744	-0.54757	0.00257945	0.84851	0.892307	0.206759	0.00989758	0.231056	0.295629	0.199973	0.259864	0.239953	0.0540405	0.291907	0.216752	0.313894	0.995398	0.0960123	0.695441	0.999844
ENSFDAG00000000116	ENSFDAG00000000116	-0.618184	-0.142235	0.0793627	0.50185	0.0117518	-0.310941	-0.131214	0.33734	0.0781659	0.00374181	0.0873514	0.111763	0.0756003	0.0982423	0.287171	0.610934	0.194492	0.0895068	0.971958	0.258107	0.675487	0.574125	0.999844
ENSFDAG00000000117	ENSFDAG00000000117	4.87829	-1.41514	-0.481161	-1.05885	-1.24257	-0.0471643	-0.0943264	2.29274	0.0979552	0.0290327	0.394446	0.429212	0.0987695	0.129416	0.00127417	6.14e-06	0.00474456	0.0918079	0.0578764	0.880707	0.793164	0.577138	0.999844
ENSFDAG00000000123	RF02271	-0.339188	-0.108135	0.0775389	-0.964541	-0.452757	-0.146085	-0.0664714	0.414916	0.0961415	0.0046023	0.107439	0.137465	0.0929858	0.120835	0.598489	0.72728	0.253054	0.00325415	0.222029	0.631891	0.848351	0.216964	0.999844
ENSFDAG00000000126	PABPC5	-0.835408	-0.145773	0.114592	-0.28867	0.00206931	-0.285757	0.17932	0.275643	0.0638701	0.00305747	0.0713757	0.0913228	0.0617737	0.0802746	0.111564	0.564071	0.0382286	0.279918	0.994536	0.250257	0.526794	0.727325	0.999844
ENSFDAG00000000132	CEP78	-0.110406	0.177333	0.0055758	0.00378377	0.132325	-0.0185283	-0.145533	0.0606063	0.0140433	0.000672252	0.0156935	0.0200794	0.0135823	0.0176502	0.653814	0.134543	0.829728	0.975904	0.350391	0.873683	0.273325	0.860841	0.999844
ENSFDAG00000000141	SLC46A1	-0.0610277	-0.0472918	-0.00516828	0.313542	0.28967	0.0340188	0.138893	0.286379	0.0663576	0.00317654	0.0741555	0.0948795	0.0641796	0.0834011	0.909206	0.854338	0.926936	0.24957	0.347007	0.893179	0.630556	0.716072	0.999844
ENSFDAG00000000144	ENSFDAG00000000144	0.262531	-0.126769	-0.0243332	0.0161101	0.231589	-0.034139	-0.118231	0.179998	0.0417079	0.00199656	0.0466091	0.0596348	0.0403389	0.0524202	0.536051	0.534775	0.586045	0.940516	0.342953	0.865028	0.605578	0.858026	0.999844
ENSFDAG00000000146	OST4	-0.122795	0.0860322	0.016948	-0.118639	0.0246216	-0.0717279	-0.143147	0.109061	0.0252708	0.00120972	0.0282404	0.0361327	0.0244413	0.0317614	0.710018	0.588375	0.626061	0.4802	0.896939	0.646376	0.421848	0.779695	0.999844
ENSFDAG00000000148	CHST14	-0.18842	-0.0946408	0.0290758	-0.19276	0.00620944	0.00974281	0.113568	0.123696	0.028662	0.00137205	0.0320301	0.0409815	0.0277212	0.0360236	0.592143	0.57615	0.432479	0.281456	0.97553	0.953337	0.549599	0.727325	0.999844
ENSFDAG00000000153	TRIM7	-0.069977	-0.0894135	0.0050883	0.330683	0.0818157	-0.0924243	0.0545072	0.0900795	0.0208726	0.000999172	0.0233254	0.0298441	0.0201875	0.0262335	0.815642	0.535987	0.872115	0.0303724	0.635788	0.515371	0.73647	0.442283	0.999844
ENSFDAG00000000157	ENSFDAG00000000157	0.203698	0.222302	-0.0343587	0.107809	-0.0312611	-0.0758714	-0.061609	0.0614673	0.0142428	0.000681803	0.0159165	0.0203646	0.0137753	0.0179009	0.411301	0.0625023	0.188223	0.392806	0.826602	0.517995	0.645175	0.7547	0.999844
ENSFDAG00000000159	GRIN3A	-0.861343	0.112603	0.0876236	-0.425306	0.302498	0.31655	0.122156	0.417233	0.0966784	0.004628	0.108039	0.138233	0.0935051	0.121509	0.182374	0.717241	0.197737	0.19569	0.415868	0.300575	0.72601	0.678924	0.999844
ENSFDAG00000000161	EXOSC8	0.228337	0.207676	-0.0396169	0.0337536	0.0568777	0.106694	-0.0915477	0.0484425	0.0112248	0.00053733	0.0125438	0.0160494	0.0108563	0.0141077	0.29953	0.0499738	0.0874378	0.76313	0.653457	0.305836	0.44085	0.831509	0.999844
ENSFDAG00000000162	GEMIN4	-0.0387643	0.0552544	0.00276367	-0.0106335	-0.0672829	0.0158267	-0.0138736	0.007111	0.00164771	7.89e-05	0.00184134	0.00235593	0.00159363	0.00207091	0.645738	0.173446	0.755663	0.804286	0.165689	0.691768	0.760468	0.838154	0.999844
ENSFDAG00000000163	ENSFDAG00000000163	0.0491525	0.191824	-0.00441692	-0.184898	-0.188723	-0.102739	-0.0633663	0.0929022	0.0215267	0.00103048	0.0240563	0.0307793	0.0208201	0.0270556	0.871887	0.191071	0.890561	0.233216	0.282057	0.476451	0.700061	0.708481	0.999844
ENSFDAG00000000168	LUC7L	0.166758	-0.000774969	-0.0207408	0.185828	-0.0585589	-0.00224677	-0.0861057	0.0321496	0.00744947	0.000356607	0.00832488	0.0106514	0.00720496	0.00936281	0.352352	0.992836	0.272062	0.041682	0.570442	0.978883	0.373533	0.481858	0.999844
ENSFDAG00000000173	UFL1	0.033165	-0.00222641	-0.00220441	-0.0220587	0.0959306	-0.113045	0.0129427	0.0509693	0.0118102	0.000565357	0.0131981	0.0168865	0.0114226	0.0148436	0.88321	0.983655	0.926133	0.847734	0.460379	0.290187	0.915398	0.839106	0.999844
ENSFDAG00000000174	TLR8	-1.1198	-0.366888	0.105289	1.66749	1.11207	0.16202	0.395499	1.42739	0.164078	0.0172607	0.291535	0.351226	0.162445	0.213311	0.348613	0.365069	0.422896	0.00201308	0.0605922	0.687691	0.391819	0.17995	0.999844
ENSFDAG00000000183	EME1	0.93872	-0.0826793	-0.112971	0.191313	0.119337	0.0645427	-0.0158065	0.245526	0.0568915	0.0027234	0.063577	0.0813447	0.0550242	0.0715037	0.0581627	0.728865	0.0304049	0.448007	0.675642	0.783201	0.952863	0.770029	0.999844
ENSFDAG00000000184	MKS1	0.0100227	-0.212721	0.0105863	-0.141126	0.0794638	-0.089381	0.168758	0.0255332	0.00591638	0.000283217	0.00661163	0.00845936	0.00572218	0.00743595	0.949986	0.00568248	0.529319	0.0826318	0.387602	0.237371	0.0503442	0.568306	0.999844
ENSFDAG00000000188	LETMD1	-0.0429913	-0.163885	0.0105995	0.0670368	0.068398	-0.106069	0.148238	0.0266443	0.00617382	0.000295541	0.00689932	0.00882745	0.00597118	0.00775952	0.79226	0.0370016	0.537525	0.419627	0.46662	0.169863	0.092406	0.763069	0.999844
ENSFDAG00000000193	ENSFDAG00000000193	0.0437947	-0.0201242	0.00202859	-0.219024	0.0378358	-0.0120008	-0.0710662	0.0518347	0.0120108	0.000574957	0.0134222	0.0171733	0.0116165	0.0150957	0.847462	0.854307	0.932578	0.0586898	0.772796	0.911342	0.562986	0.523613	0.999844
ENSFDAG00000000197	ENSFDAG00000000197	0.684048	-0.400821	-0.0604318	-0.0308819	0.0891096	0.0190505	0.0339789	0.192542	0.0446145	0.0021357	0.0498572	0.0637907	0.0431501	0.0560734	0.119015	0.0577444	0.190988	0.889999	0.724228	0.926929	0.885901	0.846129	0.999844
ENSFDAG00000000198	PTPN14	-0.199816	0.0954164	0.0145962	-0.107479	0.06432	0.0243053	0.190169	0.163926	0.0379838	0.00181829	0.0424474	0.0543101	0.0367371	0.0477397	0.621644	0.624431	0.732125	0.601898	0.78255	0.899092	0.384103	0.806406	0.999844
ENSFDAG00000000204	RPS6KA6	-0.617915	-0.0791406	0.0768558	-0.052125	0.217373	0.234911	-0.406528	0.275956	0.0639426	0.00306094	0.0714567	0.0914265	0.0618438	0.0803657	0.239485	0.754303	0.164787	0.845397	0.472201	0.344856	0.151567	0.839052	0.999844
ENSFDAG00000000218	CISD3	0.161004	-0.212808	0.00120731	-0.385654	0.0506189	-0.161807	0.142478	0.0874783	0.0202699	0.00097032	0.0226518	0.0289823	0.0196045	0.025476	0.586195	0.134985	0.969083	0.0103953	0.766211	0.247833	0.372042	0.322561	0.999844
ENSFDAG00000000229	RF00410	-0.225352	-0.209891	0.0439119	-0.000185864	0.413114	-0.260681	-0.302226	0.472705	0.109532	0.0052433	0.122403	0.156611	0.105937	0.137664	0.743087	0.525952	0.54423	0.999576	0.296532	0.423181	0.415326	0.862948	0.999844
ENSFDAG00000000230	SEMA6D	-0.571231	-0.193906	0.0813011	-0.122128	-0.225104	-0.153029	0.236306	0.253179	0.0586649	0.00280829	0.0655588	0.0838803	0.0567393	0.0737325	0.256264	0.423377	0.124986	0.633377	0.43702	0.520588	0.384162	0.810245	0.999844
ENSFDAG00000000234	CLP1	0.303225	-0.0111297	-0.0370966	0.103267	-0.00528828	0.0102573	-0.0128057	0.0549483	0.0127322	0.000609493	0.0142284	0.0182048	0.0123143	0.0160024	0.195816	0.921428	0.132936	0.386639	0.968736	0.926354	0.919368	0.751544	0.999844
ENSFDAG00000000235	LMAN2L	-0.52553	-0.00723308	0.0660005	0.155662	-0.228475	-0.179319	-0.023188	0.110344	0.0255682	0.00122395	0.0285728	0.0365579	0.024729	0.0321352	0.113636	0.96392	0.0592226	0.357109	0.232108	0.254156	0.897079	0.743177	0.999844
ENSFDAG00000000236	LDAH	0.182492	-0.15348	-0.0190916	0.128272	-0.0899974	0.0906028	0.0953575	0.0310915	0.00720431	0.000344871	0.00805091	0.0103009	0.00696784	0.00905468	0.300688	0.0705691	0.303926	0.152836	0.375222	0.277741	0.316287	0.647549	0.999844
ENSFDAG00000000237	ATAD2B	0.102209	-0.0793594	-0.00827865	0.251223	-0.019591	-0.114006	-0.0949375	0.0673464	0.015605	0.000747015	0.0174388	0.0223124	0.0150928	0.0196131	0.693692	0.525245	0.761968	0.0571199	0.895653	0.353413	0.497836	0.520547	0.999844
ENSFDAG00000000239	DGUOK	0.222114	0.0978315	-0.034188	0.0197946	0.0370449	0.327027	-0.264275	0.109449	0.0253607	0.00121402	0.0283409	0.0362613	0.0245283	0.0318744	0.501976	0.539001	0.326491	0.906399	0.845754	0.0367893	0.138807	0.851178	0.999844
ENSFDAG00000000247	ZMYM4	-0.145223	0.00449364	0.0215897	-0.0967957	0.0154694	-0.11143	-0.038812	0.0447836	0.0103769	0.000496745	0.0115964	0.0148372	0.0100363	0.0130422	0.492563	0.964815	0.332706	0.368724	0.898942	0.266016	0.733967	0.745349	0.999844
ENSFDAG00000000250	ENSFDAG00000000250	-0.0110314	0.239058	-0.0110202	0.140286	-0.054807	0.0784618	-0.178841	0.0379983	0.0088047	0.000421482	0.00983937	0.0125891	0.00851571	0.0110661	0.954871	0.0108439	0.591415	0.157284	0.625217	0.395185	0.0891164	0.648382	0.999844
ENSFDAG00000000252	AQR	-0.0403778	0.0320169	0.00189878	0.0205057	0.0778374	-0.0763391	0.0613323	0.0496689	0.0115089	0.000550933	0.0128614	0.0164557	0.0111312	0.0144649	0.85623	0.765365	0.935525	0.856514	0.543998	0.469333	0.610083	0.840951	0.999844
ENSFDAG00000000255	ENSFDAG00000000255	-0.314002	-0.141761	0.0441728	-0.209486	0.15786	-0.0165701	0.110513	0.0604684	0.0140113	0.000670723	0.0156578	0.0200337	0.0135514	0.01761	0.201625	0.231067	0.088078	0.0941042	0.264722	0.88681	0.404966	0.583471	0.999844
ENSFDAG00000000260	GAB3	0.235287	-0.231469	-0.0203178	0.230982	-0.010512	-0.210131	0.221082	0.225055	0.0521483	0.00249634	0.0582764	0.0745627	0.0504366	0.0655422	0.619918	0.310767	0.684262	0.338655	0.969292	0.349449	0.387828	0.742729	0.999844
ENSFDAG00000000266	RF01684	-0.363831	0.206913	0.0327978	0.670007	-0.701557	-0.0333291	-0.175965	0.729122	0.168947	0.00808751	0.188801	0.241564	0.163402	0.21234	0.670044	0.614684	0.715334	0.12308	0.153464	0.934288	0.702561	0.622184	0.999844
ENSFDAG00000000269	HSPB7	1.00271	0.277811	-0.12921	-0.621724	-0.317596	0.843436	-0.26894	0.717978	0.166365	0.0079639	0.185915	0.237872	0.160904	0.209094	0.236662	0.4958	0.147651	0.149326	0.514928	0.0354958	0.556435	0.64482	0.999844
ENSFDAG00000000272	ENSFDAG00000000272	0.46663	0.213932	-0.071623	0.164331	0.228897	-0.000312018	-0.0525184	0.283563	0.0657052	0.00314531	0.0734264	0.0939467	0.0635486	0.0825811	0.380873	0.403947	0.201572	0.544217	0.455189	0.999012	0.85499	0.794405	0.999844
ENSFDAG00000000273	ZNF232	-0.0226028	0.212205	-0.00566586	-0.0247648	0.0900536	0.0186924	-0.172356	0.0426852	0.00989071	0.000473469	0.011053	0.0141419	0.00956607	0.0124311	0.912884	0.0328636	0.794565	0.813777	0.448893	0.848435	0.122136	0.838154	0.999844
ENSFDAG00000000280	PRPS1	-0.127449	0.101502	0.0120647	-0.20351	0.11314	-0.00757215	0.0298668	0.0347575	0.00805378	0.000385535	0.0090002	0.0115155	0.00778943	0.0101223	0.49422	0.258041	0.538919	0.0319404	0.291733	0.931629	0.766575	0.44841	0.999844
ENSFDAG00000000281	GLIPR1	-1.4685	0.259254	0.170635	-0.204287	-0.215629	-0.0657925	-0.166012	0.289374	0.0298665	0.00352818	0.0575022	0.068456	0.0296557	0.0389456	0.0063356	0.133578	0.00406961	0.394259	0.40986	0.702423	0.400224	0.75558	0.999844
ENSFDAG00000000282	SRPK1	0.0723741	-0.0207136	-0.00877434	-0.0330533	0.0617477	0.0235298	0.0251452	0.012216	0.00283061	0.000135502	0.00316325	0.00404727	0.00273771	0.00355764	0.512588	0.697034	0.450984	0.556741	0.331749	0.652926	0.673335	0.796892	0.999844
ENSFDAG00000000290	ABHD3	-1.95235	0.0955844	0.220918	0.0190152	0.299091	-0.0374566	0.100425	0.222707	0.0240696	0.00270619	0.0447642	0.0535641	0.0238705	0.0313476	3.52e-05	0.537827	2.17e-05	0.928387	0.19625	0.808442	0.570575	0.855734	0.999844
ENSFDAG00000000291	RF00154	-0.449046	-0.160082	0.0649303	0.329642	0.374787	-0.486721	-0.229206	0.634762	0.147083	0.00704085	0.164367	0.210302	0.142255	0.184859	0.573013	0.676379	0.439043	0.416169	0.413776	0.196888	0.593968	0.761107	0.999844
ENSFDAG00000000294	PWP1	0.0293817	0.0105066	-0.00220832	-0.113858	0.0147921	-0.0330726	0.07214	0.019901	0.00461131	0.000220744	0.0051532	0.00659335	0.00445995	0.00579569	0.835013	0.877041	0.881842	0.112721	0.855449	0.620441	0.343335	0.608458	0.999844
ENSFDAG00000000295	JARID2	0.742734	0.208342	-0.109678	0.330902	0.150823	0.332009	-0.274059	0.330887	0.0766708	0.00367024	0.0856806	0.109626	0.0741542	0.0963631	0.196634	0.451797	0.0702345	0.258279	0.648733	0.222761	0.377316	0.71959	0.999844
ENSFDAG00000000296	MTA3	0.0409634	-0.131715	-0.00479286	0.243927	0.124946	0.0385443	-0.0329313	0.0472362	0.00531833	0.000572163	0.00959501	0.0115332	0.00526845	0.00691839	0.850503	0.0708988	0.84119	0.0127664	0.244646	0.595399	0.692165	0.344259	0.999844
ENSFDAG00000000298	ENSFDAG00000000298	0.0803842	-0.359615	0.01034	-0.171397	0.0929284	-0.154626	0.245021	0.113868	0.0263847	0.00126304	0.0294852	0.0377254	0.0255187	0.0331614	0.811714	0.0268343	0.771092	0.3182	0.632334	0.33307	0.17846	0.738574	0.999844
ENSFDAG00000000301	RF00026	0.457595	0.68112	-0.0774442	-0.0247722	-0.522457	0.0732236	-0.21601	0.682265	0.15809	0.00756776	0.176667	0.22604	0.152901	0.198694	0.579583	0.0867021	0.373339	0.953002	0.271812	0.851456	0.627961	0.860168	0.999844
ENSFDAG00000000307	RABL3	-0.138476	0.100081	0.0121092	0.0552718	-0.0422617	0.0141563	-0.0933996	0.0504231	0.0116837	0.000559299	0.0130567	0.0167056	0.0113002	0.0146845	0.537446	0.354502	0.608633	0.628589	0.743686	0.894059	0.440854	0.809444	0.999844
ENSFDAG00000000309	ENSFDAG00000000309	-0.0450816	0.0696454	0.00865789	-0.0958388	-0.0974427	-0.118408	-0.0289749	0.0779092	0.0180526	0.000864179	0.020174	0.025812	0.01746	0.0226892	0.87169	0.604215	0.768363	0.499832	0.544175	0.370196	0.847461	0.784754	0.999844
ENSFDAG00000000316	EXOC3	0.0572347	-0.060987	-0.00662991	0.022544	0.0603288	-0.00709111	0.0933491	0.0120614	0.00279477	0.000133786	0.00312319	0.00399602	0.00270304	0.00351259	0.602263	0.248654	0.566513	0.686656	0.339904	0.891512	0.115243	0.822148	0.999844
ENSFDAG00000000325	PTBP2	-0.177279	0.228491	0.00459841	0.176918	0.0664677	0.0764463	-0.1465	0.0280447	0.00649831	0.000311075	0.00726195	0.00929142	0.00628502	0.00816735	0.289782	0.00459055	0.794308	0.0378856	0.490473	0.334906	0.105007	0.471148	0.999844
ENSFDAG00000000334	ARID2	0.234802	-0.275471	-0.0110338	-0.0835865	0.0397455	-0.0921632	0.0610414	0.0577932	0.0133914	0.000641049	0.0149651	0.0191473	0.0129519	0.0168309	0.328714	0.0172905	0.662988	0.494432	0.773935	0.418041	0.637989	0.784098	0.999844
ENSFDAG00000000337	PNPLA2	0.12901	0.0125007	-0.019286	0.0626623	-0.282848	0.181342	0.0546266	0.313326	0.0726018	0.00347545	0.0811334	0.103808	0.0702188	0.091249	0.817722	0.962996	0.743561	0.825878	0.380005	0.49376	0.856495	0.838154	0.999844
ENSFDAG00000000338	ENSFDAG00000000338	0.308109	-0.119805	-0.0324622	-0.0434352	0.0945516	0.0703711	0.0435499	0.0919508	0.0213062	0.00101993	0.0238099	0.030464	0.0206069	0.0267785	0.309593	0.411778	0.309408	0.778335	0.588011	0.62398	0.790139	0.833353	0.999844
ENSFDAG00000000342	STARD8	1.3464	-0.632107	-0.133745	0.305971	0.0324685	0.129527	0.00750726	0.281475	0.0652214	0.00312215	0.0728857	0.0932549	0.0630806	0.081973	0.0111556	0.0133193	0.0166839	0.257073	0.915326	0.60605	0.979081	0.71959	0.999844
ENSFDAG00000000348	POLR2K	0.0338213	0.414998	-0.022894	-0.0540676	0.0591449	0.11185	-0.244327	0.0613524	0.0142162	0.000680529	0.0158867	0.0203266	0.0137495	0.0178675	0.891391	0.000500282	0.380159	0.66795	0.678256	0.340145	0.0675728	0.818187	0.999844
ENSFDAG00000000349	RAP2B	-0.492466	0.367995	0.0212345	0.453971	-0.0415556	0.255528	0.00765162	0.314632	0.0729043	0.00348993	0.0814714	0.10424	0.0705113	0.0916291	0.379966	0.172913	0.719261	0.111729	0.897587	0.3359	0.979834	0.607601	0.999844
ENSFDAG00000000351	ARFGAP3	0.161976	-0.12883	-0.0165611	0.0110717	0.0474905	0.0647034	0.0885378	0.0610133	0.0141376	0.000676767	0.0157989	0.0202142	0.0136735	0.0177687	0.511986	0.278586	0.524382	0.929809	0.738361	0.580036	0.50656	0.855734	0.999844
ENSFDAG00000000352	GLYAT	-0.447579	0.0918132	0.0547326	-0.185378	-0.0140258	-0.0217143	-0.121794	0.123826	0.0286922	0.0013735	0.0320639	0.0410247	0.0277504	0.0360616	0.203398	0.587798	0.13972	0.300548	0.944793	0.89629	0.521287	0.733727	0.999844
ENSFDAG00000000355	C1GALT1C1	-0.269788	0.247876	0.0253062	-0.0891085	-0.0739375	-0.0218678	-0.152747	0.0449535	0.0104163	0.00049863	0.0116404	0.0148935	0.0100744	0.0130917	0.203213	0.0151523	0.257096	0.408852	0.544613	0.827532	0.181882	0.759683	0.999844
ENSFDAG00000000362	CADM1	-0.38796	0.21697	0.0030203	0.614297	0.638698	0.166233	0.524767	0.373424	0.0512887	0.00444247	0.0802393	0.0985421	0.0505085	0.0662779	0.525513	0.338036	0.963857	0.0301109	0.0418885	0.459502	0.0415132	0.440696	0.999844
ENSFDAG00000000374	ENSFDAG00000000374	1.09684	-0.443887	-0.107237	-0.0208427	-0.0911808	0.166276	-0.00817287	0.182612	0.0423137	0.00202556	0.0472861	0.060501	0.0409248	0.0531816	0.0102663	0.0309352	0.0171855	0.92364	0.710861	0.411115	0.971729	0.854935	0.999844
ENSFDAG00000000376	ENSFDAG00000000376	0.146062	0.0777652	-0.0160282	0.00752479	-0.0476906	-0.00208152	-0.170756	0.0992694	0.023002	0.00110111	0.025705	0.0328887	0.022247	0.0289099	0.642945	0.608129	0.629078	0.962566	0.792572	0.988865	0.315246	0.860841	0.999844
ENSFDAG00000000381	SMAGP	-0.474584	-0.316335	0.0769918	-0.150384	0.484581	-0.17485	-0.226035	0.0645272	0.0149518	0.000715743	0.0167088	0.0213784	0.014461	0.018792	0.0617229	0.00968088	0.00400416	0.244668	0.000919049	0.145944	0.0991718	0.713772	0.41434
ENSFDAG00000000383	NRSN1	-1.50351	0.0864971	0.168536	-0.992921	-0.0699941	0.267844	0.875786	0.545085	0.0786694	0.00645084	0.118934	0.146817	0.07735	0.101464	0.0417046	0.757786	0.0358711	0.0039877	0.855055	0.33552	0.00596995	0.229943	0.999844
ENSFDAG00000000390	LSM2	0.0901287	0.0368852	-0.0185976	0.0108858	0.187325	0.228503	-0.0985245	0.144302	0.0334367	0.00160062	0.0373659	0.0478084	0.0323392	0.0420246	0.812454	0.840139	0.642038	0.955091	0.391595	0.203851	0.630794	0.860841	0.999844
ENSFDAG00000000392	FKTN	-0.153154	-0.00451926	0.0217712	-0.168616	0.0290428	-0.0246446	0.0116441	0.0642428	0.0148859	0.000712589	0.0166352	0.0212842	0.0143973	0.0187092	0.545678	0.970453	0.414745	0.191101	0.842207	0.837267	0.932159	0.677156	0.999844
ENSFDAG00000000405	KRT18	-2.2447	-0.874008	0.316939	-0.27293	-0.829448	0.0705305	0.203412	1.28464	0.0381948	0.0163897	0.215556	0.228054	0.0386165	0.0505439	0.0476508	7.75e-06	0.0132991	0.556629	0.0824076	0.719659	0.365582	0.796892	0.999844
ENSFDAG00000000408	RF02139	-0.00928527	-1.47709	0.0981194	-0.170476	-0.06009	-0.335591	-0.313341	0.462135	0.107083	0.00512606	0.119666	0.153109	0.103568	0.134586	0.989102	6.37e-06	0.170547	0.622148	0.87795	0.297044	0.393041	0.809167	0.999844
ENSFDAG00000000414	PCDH9	-0.163919	-0.0964687	0.0312722	-0.801127	0.131673	0.0428647	0.381703	0.175482	0.0406615	0.00194647	0.0454397	0.0581386	0.0393268	0.0511051	0.695574	0.632363	0.478437	0.000171119	0.585004	0.828871	0.0913211	0.0796215	0.999844
ENSFDAG00000000418	ILK	0.28314	-0.185608	-0.0197656	-0.0796498	-0.123528	-0.0206513	0.0248679	0.0269924	0.00625449	0.000299403	0.00698947	0.0089428	0.0060492	0.00786091	0.0848205	0.0189287	0.253327	0.340735	0.191465	0.790608	0.779109	0.742729	0.999844
ENSFDAG00000000426	LEPROTL1	-0.332209	0.0330205	0.0356548	-0.0838189	0.0629299	0.147688	-0.0475611	0.0340816	0.00789714	0.000378037	0.00882516	0.0112915	0.00763794	0.00992546	0.0719396	0.710208	0.0666844	0.372265	0.553705	0.0910493	0.633082	0.747107	0.999844
ENSFDAG00000000432	PLEKHA1	-0.00114077	0.0141551	0.00562527	0.0815043	-0.0462213	-0.191028	-0.135025	0.0526367	0.0121966	0.000583853	0.0136299	0.017439	0.0117963	0.0153292	0.996033	0.898013	0.815913	0.485097	0.72633	0.0786067	0.275461	0.781791	0.999844
ENSFDAG00000000442	ACSS2	0.0597521	-0.0687291	-0.00125131	0.0480432	0.357083	-0.154103	-0.214743	0.0722513	0.0167416	0.00080142	0.0187089	0.0239375	0.0161921	0.0210415	0.824084	0.595293	0.964744	0.725406	0.0210007	0.22588	0.138765	0.826038	0.858131
ENSFDAG00000000444	ST3GAL4	0.147378	-0.438325	0.00273953	-0.156391	0.116253	0.00681283	0.205319	0.0356747	0.00826628	0.000395708	0.00923768	0.0118193	0.00799496	0.0103894	0.435225	1.43e-06	0.890464	0.103702	0.284923	0.939265	0.0439729	0.595523	0.999844
ENSFDAG00000000451	RGS22	-1.09615	-0.568673	0.16368	-0.260766	0.154292	-0.259803	0.126223	0.208627	0.0483416	0.00231411	0.0540223	0.0691198	0.0467548	0.0607577	0.0164014	0.00969738	0.000667649	0.261894	0.557292	0.22955	0.608594	0.71959	0.999844
ENSFDAG00000000454	HEMK1	0.055088	-0.0654459	-0.00170546	-0.0718427	-0.161781	0.0557592	0.0697884	0.0220136	0.00510084	0.000244178	0.00570025	0.00729329	0.00493342	0.00641095	0.710423	0.359483	0.913091	0.341321	0.0581759	0.427279	0.383421	0.742729	0.999844
ENSFDAG00000000456	HDLBP	0.00959091	-0.166528	0.0069501	-0.201677	0.0503497	0.026016	0.186707	0.0576369	0.0133552	0.000639315	0.0149246	0.0190956	0.0129169	0.0167854	0.968134	0.149586	0.783413	0.0987715	0.715589	0.81894	0.149556	0.587912	0.999844
ENSFDAG00000000457	ENSFDAG00000000457	0.0901382	0.0991691	-0.0101304	-0.00192665	0.0486612	-0.165011	-0.105942	0.0996642	0.0230935	0.00110549	0.0258073	0.0330195	0.0223355	0.0290249	0.775245	0.514029	0.760607	0.990431	0.78886	0.269543	0.534042	0.861287	0.999844
ENSFDAG00000000459	RF00026	-0.339862	0.528892	0.0182615	0.68484	0.202282	-0.0537048	-1.13147	0.419833	0.0972808	0.00465684	0.108713	0.139094	0.0940878	0.122267	0.599915	0.0899394	0.789005	0.037796	0.587557	0.861014	0.00121276	0.471148	0.999844
ENSFDAG00000000462	SERPINF1	-1.2551	-0.0627652	0.156905	-0.265062	0.36332	-0.237827	-0.0325709	0.366781	0.0849879	0.00406838	0.0949751	0.121518	0.0821984	0.106816	0.0382271	0.829535	0.0138958	0.389741	0.297298	0.406808	0.920616	0.753037	0.999844
ENSFDAG00000000468	ZNF180	0.499747	-0.0158371	-0.0542049	-0.0546034	0.00751631	-0.148912	0.0359165	0.0895799	0.0207568	0.000993631	0.023196	0.0296785	0.0200755	0.0260881	0.094974	0.912469	0.0855064	0.719955	0.965199	0.293266	0.824027	0.826038	0.999844
ENSFDAG00000000469	RF01978	-0.712475	0.786833	0.0343839	0.0287346	0.26794	0.157716	-0.0860706	0.77975	0.180678	0.00864908	0.20191	0.258338	0.174748	0.227084	0.419754	0.0641553	0.711593	0.949012	0.598082	0.705961	0.856667	0.859528	0.999844
ENSFDAG00000000480	ATP6V0A1	0.590946	-0.020648	-0.0821509	0.312626	-0.130374	0.357141	0.0568294	0.325114	0.075333	0.0036062	0.0841856	0.107713	0.0728604	0.0946817	0.300012	0.940033	0.171311	0.281269	0.691188	0.1858	0.853473	0.727325	0.999844
ENSFDAG00000000483	RF01975	-0.595194	0.696657	0.0339025	0.0500489	-0.0127029	-0.0404169	-0.0951549	0.245851	0.0569668	0.002727	0.0636611	0.0814523	0.0550969	0.0715982	0.229987	0.00351351	0.516199	0.842762	0.964498	0.863291	0.722129	0.839052	0.999844
ENSFDAG00000000485	C19orf54	-0.037888	0.0849915	-0.0047552	-0.173729	0.0547215	0.239797	0.0651247	0.130397	0.0302147	0.00144638	0.0337653	0.0432015	0.0292229	0.0379751	0.916437	0.624875	0.900497	0.344432	0.792339	0.160691	0.738235	0.742729	0.999844
ENSFDAG00000000486	RF00066	-0.36976	0.0156446	0.0482312	-0.32863	0.0206762	0.000164701	0.0816947	0.157606	0.0365193	0.00174818	0.0408108	0.052216	0.0353206	0.045899	0.351649	0.934753	0.248687	0.103791	0.927903	0.999301	0.702964	0.595523	0.999844
ENSFDAG00000000492	NUP54	0.170683	0.0831979	-0.0293522	0.17171	0.0513405	-0.00805917	0.036657	0.0574815	0.0133192	0.000637591	0.0148844	0.0190441	0.012882	0.0167401	0.47652	0.470973	0.245058	0.159297	0.709869	0.943393	0.776931	0.650596	0.999844
ENSFDAG00000000494	ENSFDAG00000000494	-0.873266	0.102633	0.112768	-0.234264	-0.0300442	0.03389	-0.55651	0.510047	0.118185	0.0056575	0.132073	0.168983	0.114305	0.148539	0.22142	0.765289	0.133809	0.519179	0.941737	0.920154	0.148753	0.789669	0.999844
ENSFDAG00000000498	EEA1	0.0223575	0.101346	0.002099	-0.220321	0.0625128	-0.259402	0.0124666	0.179719	0.0416432	0.00199346	0.0465368	0.0595423	0.0402763	0.0523389	0.95794	0.619448	0.962504	0.307106	0.797807	0.196166	0.956543	0.737181	0.999844
ENSFDAG00000000499	CD1D	0.353821	0.008627	-0.0631068	0.745592	-0.0981359	0.230664	-0.000786767	0.347197	0.0804501	0.00385115	0.089904	0.115029	0.0778095	0.101113	0.548189	0.975736	0.309198	0.0128958	0.772313	0.408282	0.998026	0.345217	0.999844
ENSFDAG00000000501	HIPK2	0.430098	0.00564118	-0.047574	0.374652	-0.422422	0.00311236	-0.311061	0.867015	0.200899	0.00961703	0.224507	0.287249	0.194305	0.252498	0.644148	0.989958	0.627591	0.429117	0.4306	0.994366	0.535892	0.766288	0.999844
ENSFDAG00000000503	RAB3IL1	0.375884	0.0968933	-0.0665508	0.455517	0.0647602	0.0244365	0.3185	0.401689	0.0930766	0.00445559	0.104014	0.133083	0.0900216	0.116983	0.553132	0.750792	0.318758	0.157832	0.8591	0.935088	0.351744	0.648916	0.999844
ENSFDAG00000000504	MID2	0.0585093	-0.23679	0.0115893	-0.277625	0.157899	-0.189217	0.115854	0.10967	0.025412	0.00121647	0.0283982	0.0363345	0.0245779	0.0319388	0.859762	0.137437	0.739676	0.0994651	0.407468	0.227452	0.516816	0.587912	0.999844
ENSFDAG00000000506	PCCB	0.2236	-0.0636152	-0.0280991	0.11853	0.0364357	0.0258983	0.0761297	0.0287412	0.0066597	0.0003188	0.0074423	0.00952218	0.00644111	0.0083702	0.187194	0.435667	0.115548	0.169455	0.708861	0.746927	0.405341	0.660536	0.999844
ENSFDAG00000000509	RF00554	-0.00998745	-0.385438	0.0181872	0.537636	0.072847	-0.134528	-0.321942	0.959404	0.222306	0.0106418	0.24843	0.317858	0.21501	0.279404	0.991864	0.413652	0.860056	0.280738	0.897192	0.771721	0.542483	0.727325	0.999844
ENSFDAG00000000511	CTSV	-0.814868	0.000269442	0.0765777	1.18888	0.717568	0.0137942	-0.078214	0.297235	0.0122834	0.00376686	0.0509821	0.0553186	0.0123895	0.016232	0.135007	0.99806	0.212138	1.4e-07	0.00228159	0.901372	0.539281	0.0521789	0.4767
ENSFDAG00000000512	TMEM150C	0.523153	-1.60416	0.0164167	-0.148286	0.500298	-0.00284123	0.136351	0.309234	0.0716535	0.00343006	0.0800737	0.102452	0.0693016	0.0900571	0.346821	2.06e-09	0.779242	0.600258	0.118044	0.991389	0.649569	0.806406	0.999844
ENSFDAG00000000517	KIAA0586	0.0585002	-0.162383	0.00820968	0.0116718	-0.176351	-0.1273	-0.0542816	0.020577	0.00476795	0.000228242	0.00532824	0.00681731	0.00461145	0.00599256	0.683407	0.0186894	0.586847	0.87296	0.0326915	0.0608465	0.483174	0.84352	0.924253
ENSFDAG00000000518	FANCB	0.814823	0.0351433	-0.100876	-0.0411815	0.289458	-0.0364184	0.0120259	0.352858	0.0817619	0.00391395	0.0913699	0.116905	0.0790782	0.102762	0.170153	0.902183	0.106868	0.891633	0.397228	0.896957	0.970075	0.846212	0.999844
ENSFDAG00000000522	PSMD14	-0.193815	0.19202	0.0184404	-0.156421	0.0179732	-0.085025	-0.0232982	0.0832522	0.0192906	0.000923444	0.0215575	0.0275821	0.0186574	0.0242453	0.501761	0.166811	0.543965	0.286715	0.91382	0.533631	0.881059	0.728455	0.999844
ENSFDAG00000000524	RF00408	0.207674	0.0392141	-0.0356631	0.578785	-0.0348794	-0.269331	0.235215	0.46622	0.108029	0.00517136	0.120724	0.154462	0.104483	0.135776	0.761014	0.905031	0.619947	0.0957549	0.929282	0.404718	0.52325	0.586564	0.999844
ENSFDAG00000000528	CHD7	0.39536	-0.237744	-0.0484171	0.349272	0.13697	0.204847	-0.0170842	0.161761	0.0374822	0.00179428	0.0418869	0.0535929	0.036252	0.0471092	0.325605	0.219449	0.25303	0.0879016	0.554079	0.28198	0.937262	0.574051	0.999844
ENSFDAG00000000529	DCLK1	-0.668901	0.0535069	0.0709076	0.0327802	0.505328	-0.153701	-0.0337004	0.158493	0.036725	0.00175803	0.0410406	0.0525102	0.0355196	0.0461575	0.092922	0.780085	0.0908096	0.871456	0.0274387	0.414767	0.875355	0.843315	0.903123
ENSFDAG00000000540	PSMA2	0.0758448	0.145056	-0.0157819	-0.036543	0.0143463	0.0541841	-0.0690352	0.0433499	0.0100447	0.000480843	0.0112251	0.0143622	0.00971505	0.0126247	0.715651	0.147805	0.471704	0.730161	0.904713	0.582504	0.538942	0.826388	0.999844
ENSFDAG00000000543	ENSFDAG00000000543	0.0275834	-0.243375	0.010073	-0.104769	-0.521128	0.24973	0.168228	0.513787	0.119051	0.00569898	0.133041	0.170222	0.115143	0.149628	0.969303	0.480587	0.893852	0.773931	0.206554	0.461758	0.663634	0.832796	0.999844
ENSFDAG00000000544	ENSFDAG00000000544	-0.378587	0.0509337	0.0333096	0.105198	0.270253	0.138863	-0.0576652	0.143011	0.0331375	0.0015863	0.0370316	0.0473807	0.0320499	0.0416487	0.316775	0.779632	0.40297	0.58461	0.214397	0.437948	0.777513	0.804309	0.999844
ENSFDAG00000000548	RAD51B	0.169292	-0.13053	-0.0346694	-0.193877	0.204113	0.547495	0.440013	0.174802	0.0405039	0.00193892	0.0452636	0.0579133	0.0391744	0.050907	0.68554	0.516612	0.431079	0.362149	0.396345	0.0056719	0.0511533	0.743457	0.999844
ENSFDAG00000000552	RAB8A	0.442672	-0.311347	-0.0431541	0.447131	0.0788454	0.00717738	-0.146198	0.28163	0.0652572	0.00312387	0.0729258	0.0933062	0.0631153	0.0820181	0.404198	0.222922	0.440053	0.0977728	0.796315	0.977208	0.609709	0.587351	0.999844
ENSFDAG00000000553	RF01299	-0.730563	0.697001	0.0380507	0.57107	-0.675036	0.550359	-0.291613	0.733708	0.17001	0.00813838	0.189988	0.243084	0.16443	0.213675	0.393717	0.0909463	0.673181	0.19014	0.170954	0.174705	0.528136	0.67691	0.999844
ENSFDAG00000000554	GTPBP1	0.303349	0.14276	-0.0449177	0.345629	-0.440499	0.0781663	-0.0541136	0.404082	0.0936311	0.00448213	0.104634	0.133876	0.0905578	0.117679	0.633214	0.640822	0.502267	0.285296	0.228625	0.795056	0.874658	0.728325	0.999844
ENSFDAG00000000561	ENSFDAG00000000561	1.24311	-0.275821	-0.15206	0.360852	0.274204	0.451472	-0.0580775	0.486187	0.112656	0.00539284	0.125894	0.161078	0.108958	0.141591	0.0746161	0.411208	0.0383912	0.309147	0.494472	0.171396	0.877338	0.737181	0.999844
ENSFDAG00000000565	ENSFDAG00000000565	0.103714	0.00977573	-0.00850657	-0.15224	-0.0148949	-0.0414528	0.0287858	0.0565843	0.0131113	0.00062764	0.0146521	0.0187468	0.012681	0.0164789	0.662834	0.931964	0.734198	0.208496	0.913372	0.712791	0.82257	0.686546	0.999844
ENSFDAG00000000569	MED29	0.178476	0.0697377	-0.0194596	-0.0218963	-0.0263202	-0.0605548	-0.125186	0.125712	0.0291291	0.00139441	0.0325522	0.0416494	0.028173	0.0366107	0.614702	0.682829	0.602283	0.903405	0.897383	0.718271	0.512942	0.851178	0.999844
ENSFDAG00000000574	PMP22	-0.537758	-0.0897907	0.0824502	-0.58503	0.0839889	-0.266363	0.167712	0.138022	0.0319814	0.00153095	0.0357397	0.0457277	0.0309317	0.0401956	0.147762	0.615604	0.0350981	0.00197085	0.694493	0.129897	0.402864	0.179889	0.999844
ENSFDAG00000000576	SEC61A1	0.244092	-0.12349	-0.0294585	-0.103849	0.132037	0.152029	0.208202	0.190871	0.0442272	0.00211716	0.0494244	0.0632369	0.0427755	0.0555866	0.576362	0.557068	0.522025	0.640413	0.59954	0.462296	0.377193	0.813674	0.999844
ENSFDAG00000000579	NEDD4L	-0.261587	0.113461	0.0189743	0.210477	0.392151	-0.146779	-0.0619316	0.0785397	0.0181987	0.000871172	0.0203372	0.0260208	0.0176013	0.0228729	0.350609	0.400314	0.520317	0.139969	0.0150555	0.268577	0.682174	0.635799	0.800256
ENSFDAG00000000583	MAP3K12	0.105419	0.191037	-0.0219779	0.159906	-0.146774	0.0211976	-0.103368	0.120897	0.0280135	0.00134101	0.0313054	0.0400543	0.027094	0.0352085	0.761746	0.253708	0.548397	0.366121	0.463331	0.897531	0.581713	0.744426	0.999844
ENSFDAG00000000584	GNL1	1.18355	-0.285028	-0.127672	0.213224	0.0464076	-0.013569	0.115273	0.524303	0.121488	0.00581563	0.135764	0.173706	0.1175	0.152691	0.102147	0.4135	0.0940992	0.562802	0.91134	0.968424	0.767994	0.798557	0.999844
ENSFDAG00000000594	CCDC102A	-0.270046	-0.0987914	0.0343099	-0.260803	0.291569	0.0153445	0.166478	0.14103	0.0326785	0.00156432	0.0365186	0.0467244	0.0316059	0.0410717	0.472087	0.584724	0.385683	0.17233	0.177379	0.931219	0.411384	0.662715	0.999844
ENSFDAG00000000596	ENSFDAG00000000596	1.82994	-1.19533	-0.12979	0.38169	-2.23051	-0.633207	0.802614	1.06236	0.246163	0.0117838	0.27509	0.351969	0.238083	0.309388	0.0758287	0.0159867	0.231839	0.466776	0.000170123	0.194383	0.149031	0.775101	0.329545
ENSFDAG00000000598	SSB	0.0223851	0.169933	-0.00811048	-0.190877	0.00442261	0.0194868	0.0172131	0.0441153	0.0102221	0.000489332	0.0114233	0.0146157	0.00988656	0.0128475	0.915124	0.092807	0.713884	0.0741146	0.970818	0.844623	0.879296	0.558447	0.999844
ENSFDAG00000000599	ACRV1	0.321016	-0.0890025	-0.0367816	0.145009	0.0359812	-0.128779	0.160372	0.108797	0.0252096	0.00120679	0.0281721	0.0360453	0.0243822	0.0316845	0.330436	0.5751	0.28969	0.387618	0.849686	0.409527	0.367609	0.751636	0.999844
ENSFDAG00000000604	CRNKL1	0.0122269	0.110175	-0.00303124	0.00155467	-0.0838711	-0.138744	0.0157376	0.0277209	0.0064233	0.000307484	0.00717812	0.00918417	0.00621247	0.00807308	0.941459	0.169229	0.862757	0.98536	0.381481	0.0783595	0.860959	0.861287	0.999844
ENSFDAG00000000605	RF00001	-0.187558	-0.361761	0.0446445	-0.345927	-0.17117	-0.338534	0.658213	0.60479	0.140138	0.00670841	0.156606	0.200372	0.135538	0.176131	0.809419	0.333858	0.5857	0.382043	0.702171	0.357812	0.116795	0.749802	0.999844
ENSFDAG00000000610	CCPG1	-0.207283	-0.0188736	0.0229063	0.156284	-0.0119187	-0.00481915	-0.0551599	0.0574474	0.0133113	0.000637213	0.0148755	0.0190328	0.0128744	0.0167302	0.387135	0.870057	0.364179	0.200059	0.931154	0.966122	0.669777	0.68117	0.999844
ENSFDAG00000000611	SLC7A6OS	0.197355	-0.0698419	-0.0162853	-0.0839409	-0.144166	0.0251669	0.0288601	0.0578272	0.0133993	0.000641427	0.0149739	0.0191586	0.0129595	0.0168408	0.411819	0.546271	0.520213	0.492731	0.297619	0.825036	0.82401	0.7835	0.999844
ENSFDAG00000000613	FLI1	2.47011	-0.962946	-0.232948	-0.403476	-0.684476	-0.0705823	0.00671651	0.60931	0.0571091	0.00747705	0.118378	0.139431	0.0568425	0.0746452	0.00155379	5.59e-05	0.00706053	0.240921	0.0667924	0.767195	0.980387	0.713101	0.999844
ENSFDAG00000000617	ANAPC4	0.00612009	0.0914881	-0.00798039	0.0536486	-0.0670386	0.0509751	0.03577	0.0215036	0.00498267	0.000238521	0.0055682	0.00712433	0.00481912	0.00626243	0.96671	0.194946	0.605347	0.472169	0.427054	0.462765	0.651262	0.776237	0.999844
ENSFDAG00000000619	NAGPA	0.464116	-0.441131	-0.0472887	0.285985	0.348576	0.0693422	0.108261	0.471211	0.109186	0.00522672	0.122016	0.156116	0.105602	0.137229	0.498969	0.181873	0.513049	0.412947	0.377661	0.831028	0.770099	0.760718	0.999844
ENSFDAG00000000630	SLC12A7	0.627974	-0.177411	-0.0795499	0.598232	-0.139456	0.195843	0.0203166	0.500909	0.116067	0.00555615	0.129707	0.165955	0.112258	0.145878	0.374927	0.602544	0.285874	0.0966987	0.732105	0.558871	0.957578	0.587351	0.999844
ENSFDAG00000000631	RF00001	0.765503	-0.478704	-0.0600195	0.123126	-0.051502	0.0949021	-0.337891	0.860909	0.199484	0.00954931	0.222926	0.285226	0.192936	0.25072	0.409356	0.283811	0.539086	0.794264	0.923176	0.828943	0.499796	0.836838	0.999844
ENSFDAG00000000633	CTSZ	0.106766	-0.117289	-0.0305283	1.17317	0.567602	0.0204195	-0.0182652	0.312399	0.0231832	0.00388239	0.057899	0.0664811	0.0231915	0.0304407	0.848509	0.441111	0.624168	1.08e-06	0.0277094	0.893336	0.916623	0.0521789	0.903123
ENSFDAG00000000637	GLMP	0.787522	-0.0827346	-0.102434	0.483748	0.0439374	0.204066	-0.0470988	0.288738	0.0669044	0.00320272	0.0747665	0.0956613	0.0647084	0.0840882	0.142762	0.749074	0.0702908	0.0768682	0.887034	0.422429	0.870974	0.562992	0.999844
ENSFDAG00000000640	PARK7	0.26769	-0.0188295	-0.0258045	-0.00660214	-0.0842724	-0.0289874	-0.11818	0.0746058	0.0172871	0.000827537	0.0193186	0.0247175	0.0167197	0.0217272	0.327065	0.886123	0.369708	0.962114	0.591943	0.822618	0.422694	0.860841	0.999844
ENSFDAG00000000645	DHRS11	0.398249	-0.324114	-0.0301221	0.149046	-0.0317941	-0.0367476	-0.0689484	0.128589	0.0297958	0.00142633	0.0332972	0.0426027	0.0288178	0.0374487	0.266747	0.0604259	0.425114	0.414041	0.87758	0.828621	0.721622	0.760718	0.999844
ENSFDAG00000000648	RF00004	-0.0524823	-0.163109	0.00349608	-0.0921288	0.225708	0.368929	0.0343483	0.139067	0.0322236	0.00154254	0.0360102	0.0460739	0.0311659	0.0404999	0.88808	0.363541	0.92907	0.627327	0.293017	0.0366364	0.864477	0.809444	0.999844
ENSFDAG00000000652	DIRC2	-0.165325	0.0366299	0.0161828	-0.0230018	0.0473418	0.0390744	0.00742644	0.0935605	0.0216792	0.00103779	0.0242268	0.0309974	0.0209676	0.0272473	0.588856	0.803532	0.615427	0.882517	0.788011	0.787278	0.964115	0.844908	0.999844
ENSFDAG00000000654	ANKRD39	0.257383	-0.0382604	-0.0212026	-0.120586	0.0335185	-0.126403	-0.0376853	0.122494	0.0283834	0.00135872	0.0317188	0.0405832	0.0274518	0.0356735	0.462097	0.820346	0.565151	0.498356	0.867855	0.445518	0.841851	0.784754	0.999844
ENSFDAG00000000659	YME1L1	-0.226943	0.113571	0.0226067	-0.0186579	0.0220627	-0.0928288	0.018251	0.035811	0.00829788	0.00039722	0.00927298	0.0118645	0.00802552	0.0104291	0.230433	0.212485	0.256677	0.846368	0.839486	0.300106	0.858161	0.839052	0.999844
ENSFDAG00000000662	TNFSF13	0.959502	-0.168603	-0.154028	1.75052	1.09741	0.403221	-0.130461	1.31779	0.124963	0.0161591	0.256698	0.302741	0.124345	0.163291	0.403245	0.633396	0.225633	0.000550159	0.0460988	0.252839	0.74681	0.113377	0.999844
ENSFDAG00000000663	ENSFDAG00000000663	-0.0335138	0.161615	-0.000662144	-0.063729	-0.0109231	-0.00228096	-0.101164	0.0349559	0.00809974	0.000387735	0.00905156	0.0115812	0.00783388	0.0101801	0.85774	0.0725349	0.973175	0.502955	0.919153	0.97944	0.31603	0.785214	0.999844
ENSFDAG00000000668	RF00026	0.0837848	-0.0599049	0.00203812	-0.249123	-0.116813	0.0781669	-0.172742	0.790956	0.183275	0.00877338	0.204812	0.26205	0.177259	0.230348	0.924944	0.888715	0.98264	0.581995	0.819498	0.852711	0.718906	0.804309	0.999844
ENSFDAG00000000672	SMU1	0.0313101	0.104741	-0.00689349	0.00451071	-0.0300144	-0.0271439	-0.0606768	0.0148545	0.00344198	0.000164768	0.00384646	0.00492142	0.00332901	0.00432603	0.79726	0.0742111	0.591244	0.942021	0.668766	0.638032	0.356255	0.858465	0.999844
ENSFDAG00000000673	ENSFDAG00000000673	0.251374	0.000415991	-0.0194084	-0.149839	0.022235	-0.176727	-0.120436	0.140838	0.0326339	0.00156219	0.0364688	0.0466607	0.0315628	0.0410157	0.50297	0.998163	0.623393	0.432671	0.918015	0.319856	0.552058	0.766404	0.999844
ENSFDAG00000000675	TIMM17A	0.0766341	-0.0279561	-0.00750404	-0.0423697	0.0519104	0.0263538	-0.0228005	0.031032	0.00719052	0.000344211	0.0080355	0.0102812	0.0069545	0.00903735	0.663542	0.74164	0.685869	0.636456	0.608681	0.75199	0.810453	0.811124	0.999844
ENSFDAG00000000676	LMAN1	-0.467606	0.160421	0.0537146	-0.24492	0.00517496	-0.0792303	-0.00198204	0.0838582	0.019431	0.000930165	0.0217144	0.0277829	0.0187932	0.0244217	0.106363	0.249799	0.0782019	0.0964986	0.975232	0.563298	0.989881	0.587351	0.999844
ENSFDAG00000000677	ENSFDAG00000000677	0.582457	-0.101142	-0.0508562	-0.193937	0.174389	-0.308088	-0.118195	0.312753	0.072469	0.0034691	0.080985	0.103618	0.0700903	0.0910821	0.297639	0.70713	0.387892	0.495563	0.587987	0.24454	0.695327	0.784558	0.999844
ENSFDAG00000000678	ATG10	0.199408	-0.0250274	-0.0256861	0.296313	-0.0182544	0.183273	-0.31372	0.127122	0.0294558	0.00141005	0.0329173	0.0421166	0.028489	0.0370213	0.575969	0.88406	0.493951	0.102427	0.929123	0.277556	0.102999	0.593037	0.999844
ENSFDAG00000000679	TENT5B	-0.159413	0.615336	-0.0248845	-0.136104	0.160223	0.312199	0.225356	0.410801	0.095188	0.00455666	0.106374	0.136102	0.0920637	0.119636	0.803578	0.0461039	0.712395	0.676454	0.664069	0.303511	0.5147	0.821157	0.999844
ENSFDAG00000000690	ENSFDAG00000000690	-0.0577823	0.174104	0.00613395	0.00719335	-0.194554	-0.187145	-0.0584058	0.0377968	0.008758	0.000419246	0.00978718	0.0125224	0.00847054	0.0110074	0.766304	0.0628291	0.764501	0.942036	0.0821069	0.0420126	0.577739	0.858465	0.999844
ENSFDAG00000000697	HAUS5	0.946647	-0.0904237	-0.119508	0.217028	-0.0154855	0.322125	0.0646451	0.370196	0.0857792	0.00410626	0.0958594	0.122649	0.0829637	0.107811	0.11974	0.75752	0.0621837	0.483322	0.964731	0.263415	0.84392	0.781134	0.999844
ENSFDAG00000000707	ARL14	-1.91819	0.00578818	0.21806	-0.791175	0.756017	0.225167	0.242369	0.451998	0.104734	0.00501361	0.117041	0.14975	0.101296	0.131634	0.00432895	0.98573	0.00207252	0.0207439	0.0507424	0.479274	0.504117	0.393586	0.999844
ENSFDAG00000000708	ENSFDAG00000000708	0.205249	0.118219	-0.0442595	0.296413	0.0329618	0.212863	0.0509082	0.252543	0.0585176	0.00280124	0.0653941	0.0836696	0.0565968	0.0735473	0.682961	0.625052	0.40302	0.246408	0.909275	0.370918	0.851098	0.714264	0.999844
ENSFDAG00000000718	VGLL4	-0.173345	-0.494361	0.0345149	0.49533	-0.0273952	-0.0786385	0.0398701	0.758003	0.175639	0.00840786	0.196279	0.251132	0.169874	0.220751	0.842183	0.238161	0.70661	0.263549	0.956404	0.848685	0.932374	0.71959	0.999844
ENSFDAG00000000719	KLHDC3	0.316237	-0.25222	-0.0404741	0.240894	0.0512877	0.259314	0.197266	0.344425	0.0798078	0.0038204	0.0891862	0.114111	0.0771882	0.100306	0.589993	0.371962	0.512583	0.419878	0.879323	0.350632	0.533378	0.763265	0.999844
ENSFDAG00000000722	ENSFDAG00000000722	0.777495	-0.543893	-0.0594706	-0.208939	0.118511	-0.2443	0.288281	0.150843	0.0349524	0.00167317	0.0390597	0.0499756	0.0338051	0.0439296	0.0452995	0.00362341	0.145977	0.290423	0.596024	0.183943	0.169	0.730108	0.999844
ENSFDAG00000000723	KIAA0930	0.383735	-0.141062	-0.0500472	0.221266	0.042824	0.268154	0.0715049	0.301428	0.0698447	0.00334347	0.0780523	0.0998654	0.0675522	0.0877838	0.484589	0.593509	0.38675	0.428364	0.892207	0.302201	0.809292	0.766288	0.999844
ENSFDAG00000000724	C11orf24	-0.0814549	-0.193913	0.0196488	-0.258166	-0.038574	0.0259636	0.238405	0.107458	0.0248995	0.00119194	0.0278255	0.0356018	0.0240822	0.0312947	0.80376	0.219114	0.569269	0.121702	0.838012	0.867128	0.177769	0.620397	0.999844
ENSFDAG00000000725	IPO4	0.50732	-0.302498	-0.0521473	-0.0227201	-0.0310013	0.167557	0.304774	0.161749	0.0374794	0.00179414	0.0418837	0.0535888	0.0362492	0.0471057	0.207156	0.118165	0.218274	0.911603	0.893466	0.378825	0.160247	0.852586	0.999844
ENSFDAG00000000726	CCNDBP1	-0.550328	0.0626528	0.0638626	0.0232255	-0.161919	-0.0773191	-0.0422137	0.0544113	0.00525902	0.000666385	0.0106453	0.0125812	0.00523057	0.00686894	0.018311	0.387616	0.0133643	0.821897	0.148861	0.285031	0.610513	0.838154	0.999844
ENSFDAG00000000728	FAM83D	0.428211	-0.584371	-0.0394164	0.490391	0.192255	0.023906	0.229886	0.458033	0.106132	0.00508056	0.118604	0.15175	0.102649	0.133392	0.526919	0.0728513	0.580267	0.154463	0.621638	0.94052	0.529066	0.648382	0.999844
ENSFDAG00000000729	ENSFDAG00000000729	1.9461	-1.1635	-0.142895	-0.45772	-1.43985	-0.0910091	0.451033	0.900913	0.201378	0.0100488	0.229943	0.293888	0.195016	0.253732	0.0403326	0.00952122	0.154021	0.339816	0.00790777	0.836723	0.370569	0.742729	0.618764
ENSFDAG00000000730	RF00045	0.359975	-0.034122	-0.0320554	-0.80235	-0.637931	0.428976	0.443761	0.668422	0.154882	0.00741422	0.173083	0.221454	0.149798	0.194662	0.659721	0.930908	0.709685	0.0537835	0.175225	0.267708	0.314516	0.510986	0.999844
ENSFDAG00000000738	ASB8	-0.149809	0.110573	0.00909748	0.231677	-0.294665	-0.0499457	0.0816903	0.275485	0.0638334	0.00305571	0.0713346	0.0912703	0.0617382	0.0802285	0.77532	0.661643	0.869278	0.385708	0.329383	0.840689	0.773035	0.751364	0.999844
ENSFDAG00000000740	KCNIP1	0.896301	-0.562189	-0.0949171	0.985887	-0.495224	-0.1601	0.511058	0.795023	0.184217	0.00881849	0.205865	0.263398	0.178171	0.231532	0.314788	0.190251	0.312132	0.0297893	0.33458	0.704471	0.288191	0.439982	0.999844
ENSFDAG00000000741	RNASEK	-0.292215	0.130859	0.034433	-0.0308783	0.00922126	-0.15616	-0.132873	0.0541672	0.0125512	0.000600829	0.0140262	0.017946	0.0121393	0.0157749	0.209279	0.242789	0.160096	0.794304	0.945121	0.156385	0.290093	0.836838	0.999844
ENSFDAG00000000742	INTS8	-0.198076	-0.0353439	0.0254802	0.0988524	-0.0381693	-0.0995812	0.016724	0.0635785	0.014732	0.00070522	0.0164631	0.0210641	0.0142484	0.0185157	0.432127	0.770902	0.337312	0.441048	0.792556	0.404142	0.902182	0.768006	0.999844
ENSFDAG00000000743	ARHGAP11A	0.166148	-0.047991	-0.0174284	-0.29631	0.181299	0.00245721	0.194695	0.16969	0.0393194	0.00188222	0.04394	0.0562198	0.0380289	0.0494183	0.686702	0.808763	0.687891	0.157489	0.444493	0.989947	0.381131	0.648382	0.999844
ENSFDAG00000000749	GUK1	0.0365539	-0.0252285	-0.0133125	0.411881	0.235338	0.128121	-0.219284	0.181401	0.042033	0.00201212	0.0469724	0.0600996	0.0406533	0.0528288	0.931606	0.902064	0.766635	0.0573775	0.337071	0.525145	0.340057	0.520547	0.999844
ENSFDAG00000000763	B3GAT3	0.110862	-0.172783	-0.0026384	-0.0331908	-0.00341774	0.0462612	-0.0618717	0.118119	0.0273697	0.00131019	0.030586	0.0391338	0.0264713	0.0343994	0.747022	0.296302	0.941893	0.849479	0.986216	0.776154	0.738687	0.83946	0.999844
ENSFDAG00000000766	FLCN	0.552801	-0.092529	-0.0661024	0.216502	-0.107468	0.0964223	0.0492401	0.179972	0.0417018	0.00199627	0.0466023	0.0596261	0.0403331	0.0524126	0.192552	0.650472	0.139014	0.315909	0.659858	0.631144	0.829705	0.737534	0.999844
ENSFDAG00000000769	SRR	-0.0981674	0.189298	0.00634807	-0.0894821	-0.120641	-0.00546819	-0.0407966	0.0346643	0.00803217	0.0003845	0.00897605	0.0114846	0.00776853	0.0100952	0.598012	0.0346716	0.746137	0.344923	0.260276	0.950531	0.684715	0.742729	0.999844
ENSFDAG00000000780	CYB5D1	-0.16413	0.0880524	0.0181322	-0.117603	-0.13763	0.0318029	0.0199696	0.0269548	0.00624578	0.000298986	0.00697973	0.00893034	0.00604077	0.00784995	0.317457	0.26521	0.294345	0.15923	0.145282	0.682403	0.821675	0.650596	0.999844
ENSFDAG00000000781	SLC16A14	0.0908159	0.0350758	-0.00770835	0.0406365	-0.250195	-0.0406012	-0.0445839	0.303415	0.0703051	0.00336551	0.0785669	0.100524	0.0679975	0.0883625	0.869046	0.894758	0.894294	0.88473	0.430041	0.876268	0.880777	0.844995	0.999844
ENSFDAG00000000786	GAPVD1	-0.0586948	-0.0522855	0.00979872	-0.00686695	0.0128023	-0.0297791	0.0210339	0.0217271	0.00503446	0.000241	0.00562607	0.00719837	0.00486921	0.00632752	0.690485	0.461187	0.527915	0.927055	0.88006	0.669555	0.791453	0.855734	0.999844
ENSFDAG00000000787	THYN1	0.0960692	0.193442	-0.0216759	0.133485	-0.0492988	0.11133	-0.205158	0.0467021	0.0108215	0.000518025	0.0120931	0.0154728	0.0104663	0.0136009	0.656648	0.062949	0.340914	0.224808	0.691865	0.276497	0.0785505	0.702216	0.999844
ENSFDAG00000000793	HNRNPA2B1	0.314418	-0.126751	-0.03666	0.00561992	0.0212017	0.147778	0.117836	0.0416853	0.00965902	0.000462378	0.0107941	0.0138107	0.00934199	0.0121399	0.123564	0.197159	0.0882169	0.956861	0.85683	0.12628	0.284855	0.860841	0.999844
ENSFDAG00000000800	DNAJC1	-0.278701	0.103671	0.0388537	-0.0856939	-0.122947	-0.201047	-0.119805	0.181331	0.0420167	0.00201134	0.0469543	0.0600764	0.0406376	0.0528084	0.512797	0.613025	0.386303	0.692497	0.615943	0.31861	0.602129	0.823775	0.999844
ENSFDAG00000000805	ERCC6L2	-0.00234769	-0.0507684	0.00358629	-0.0172556	-0.00661244	-0.0570413	0.0381934	0.0560429	0.0129859	0.000621634	0.0145119	0.0185675	0.0125596	0.0163212	0.992087	0.655951	0.885627	0.8861	0.961296	0.610766	0.764971	0.845437	0.999844
ENSFDAG00000000809	SGPL1	0.170308	-0.102701	-0.0378259	0.805241	0.623837	0.109661	0.0114429	0.162202	0.0185739	0.00196205	0.0330951	0.0398545	0.0183911	0.02415	0.67239	0.451108	0.39313	9.58e-06	0.00177881	0.418731	0.941302	0.0521789	0.4767
ENSFDAG00000000810	TGFB3	-0.707064	-0.460805	0.11497	-0.331707	-0.0557449	0.0126348	-0.0411406	0.275102	0.0637447	0.00305146	0.0712355	0.0911434	0.0616524	0.080117	0.177637	0.0679803	0.0374077	0.213936	0.853506	0.959417	0.884436	0.691464	0.999844
ENSFDAG00000000816	ENSFDAG00000000816	0.00351371	-0.440276	0.00732064	0.524613	0.589946	-0.186871	0.0734709	0.128146	0.0252368	0.00145713	0.0311405	0.0395258	0.0245501	0.0320548	0.992168	0.00558066	0.847915	0.00295027	0.00300356	0.233003	0.681539	0.211551	0.490762
ENSFDAG00000000818	RF00026	-0.652339	0.546791	0.05158	-0.0701088	0.0900275	-0.00841464	-0.207928	0.244068	0.0565537	0.00270723	0.0631995	0.0808617	0.0546975	0.0710791	0.186689	0.0214893	0.321524	0.780338	0.751551	0.971299	0.435446	0.833353	0.999844
ENSFDAG00000000821	MTMR4	0.342753	-0.0239415	-0.0426807	0.131015	-0.0475572	0.0939516	-0.0100456	0.0924171	0.0214143	0.0010251	0.0239307	0.0306185	0.0207114	0.0269143	0.259544	0.870041	0.182514	0.397039	0.785788	0.513866	0.951174	0.755736	0.999844
ENSFDAG00000000823	RECK	-0.63045	-0.114426	0.0806646	-0.104157	0.091157	-0.0867503	0.0430322	0.157076	0.0363966	0.00174231	0.0406736	0.0520406	0.0352019	0.0457447	0.111671	0.54865	0.0532971	0.605538	0.689456	0.643818	0.840544	0.806512	0.999844
ENSFDAG00000000825	GLYCTK	0.276019	-0.190466	-0.0283109	0.0741664	0.0568645	0.0499802	0.103561	0.161528	0.037428	0.00179168	0.0418263	0.0535154	0.0361995	0.0470411	0.492223	0.324866	0.503596	0.71687	0.805828	0.792788	0.633019	0.826038	0.999844
ENSFDAG00000000833	VAMP4	-0.217852	0.106283	0.0159712	0.133278	0.0849984	0.0829412	-0.105953	0.0353091	0.00818157	0.000391652	0.00914301	0.0116982	0.00791303	0.0102829	0.24631	0.239987	0.419651	0.163367	0.431943	0.351133	0.296093	0.654125	0.999844
ENSFDAG00000000840	LYST	0.532832	-0.302777	-0.0497609	-0.0157478	0.0868331	0.0676291	0.0323757	0.109339	0.0253353	0.0012128	0.0283125	0.0362249	0.0245037	0.0318424	0.107093	0.0571425	0.153041	0.925435	0.648226	0.665717	0.856028	0.855337	0.999844
ENSFDAG00000000841	RF00001	-0.545498	-0.139331	0.0773745	-0.193352	-0.264832	-0.0991995	0.131563	0.212843	0.0493185	0.00236088	0.055114	0.0705166	0.0476997	0.0619855	0.237048	0.530399	0.111287	0.410165	0.318619	0.649681	0.597199	0.759869	0.999844
ENSFDAG00000000842	RF00324	1.15477	-0.25186	-0.106499	0.105481	-0.443787	-0.0451094	-0.511096	0.815236	0.188901	0.0090427	0.211099	0.270094	0.182701	0.237419	0.200915	0.562262	0.262736	0.81842	0.39315	0.915951	0.294212	0.838154	0.999844
ENSFDAG00000000844	SCYL2	-0.17381	-0.0292656	0.0265969	-0.0715744	-0.0786342	-0.133084	0.0557856	0.0805933	0.0186745	0.000893951	0.020869	0.0267012	0.0180616	0.0234709	0.540376	0.830425	0.373703	0.620277	0.630359	0.322049	0.715761	0.808721	0.999844
ENSFDAG00000000846	EXOSC1	0.0478248	0.0898524	-0.00720468	-0.0535225	-0.0391944	-0.00224823	-0.0415083	0.0350825	0.00812907	0.000389139	0.00908434	0.0116231	0.00786225	0.010217	0.798466	0.318972	0.714942	0.574422	0.716195	0.979772	0.681328	0.803968	0.999844
ENSFDAG00000000849	ENSFDAG00000000849	0.483744	-0.0402696	-0.057217	0.0240845	-0.112561	0.147226	0.0366509	0.177463	0.0411206	0.00196845	0.0459528	0.0587951	0.0397709	0.0516821	0.250838	0.842587	0.197181	0.910544	0.642496	0.460364	0.871921	0.852225	0.999844
ENSFDAG00000000851	ENSFDAG00000000851	0.242533	0.0151401	-0.0334301	0.0801754	0.117685	0.0169828	0.0190648	0.0469626	0.0108819	0.000520915	0.0121606	0.0155591	0.0105247	0.0136768	0.263069	0.884603	0.142998	0.467196	0.34544	0.868518	0.870503	0.775101	0.999844
ENSFDAG00000000853	BUD13	0.350436	0.145387	-0.0558755	0.23967	-0.107682	0.11678	0.0144461	0.116511	0.0269972	0.00129236	0.0301697	0.0386011	0.026111	0.0339312	0.304582	0.376241	0.120116	0.167636	0.583637	0.469866	0.937491	0.659967	0.999844
ENSFDAG00000000857	CEP295	0.179022	0.0135489	-0.0224661	-0.0322435	0.0185897	-0.0213973	0.0945642	0.0360759	0.00835926	0.000400158	0.00934158	0.0119522	0.00808488	0.0105063	0.345918	0.882192	0.261403	0.738678	0.86498	0.811905	0.356228	0.828002	0.999844
ENSFDAG00000000859	UST	-0.0923557	0.196179	0.00482955	-0.247255	0.180214	-0.0676898	0.014427	0.126451	0.0293004	0.00140261	0.0327436	0.0418944	0.0283387	0.036826	0.795081	0.251761	0.897393	0.171809	0.378609	0.687611	0.940072	0.662303	0.999844
ENSFDAG00000000862	ENSFDAG00000000862	0.471792	-0.507724	-0.0362171	0.125689	-0.00887932	0.0441179	0.195175	0.147157	0.0340983	0.00163229	0.0381053	0.0487544	0.0329791	0.0428561	0.218745	0.00596768	0.370025	0.519655	0.967923	0.808053	0.345785	0.789669	0.999844
ENSFDAG00000000864	ENSFDAG00000000864	-0.390692	-0.162506	0.0397514	0.444406	0.144752	0.161365	-0.0544765	0.131698	0.0305162	0.00146081	0.0341022	0.0436326	0.0295145	0.038354	0.281669	0.352236	0.298315	0.0161055	0.488323	0.347592	0.780885	0.37243	0.999844
ENSFDAG00000000865	ATIC	-0.0331409	-0.065659	0.00658301	-0.151105	0.0927216	0.000601534	0.134528	0.0190917	0.00442381	0.000211768	0.00494366	0.00632525	0.0042786	0.00556002	0.810446	0.323554	0.651002	0.0316273	0.243676	0.992663	0.0712058	0.448242	0.999844
ENSFDAG00000000866	MAB21L1	0.804222	-0.833542	-0.0490861	-0.348978	0.547207	-0.1727	0.110979	0.24204	0.0560839	0.00268474	0.0626745	0.0801899	0.0542431	0.0704886	0.102117	0.000431997	0.343464	0.163327	0.0533132	0.45838	0.675943	0.654125	0.999844
ENSFDAG00000000870	FAM160A2	1.07668	-0.299756	-0.129252	0.470267	-0.0551741	0.434598	0.0402048	0.408742	0.0947109	0.00453382	0.105841	0.13542	0.0916022	0.119037	0.0921674	0.330047	0.0549108	0.148317	0.880818	0.15102	0.907233	0.64482	0.999844
ENSFDAG00000000879	RF00282	0.461144	0.08823	-0.0510794	0.179514	-0.385582	-0.00232616	-0.301243	0.423262	0.0980754	0.00469488	0.1096	0.14023	0.0948562	0.123265	0.478441	0.778149	0.455983	0.587654	0.303167	0.993974	0.390883	0.804309	0.999844
ENSFDAG00000000880	ZNF512	0.165497	-0.103138	-0.0151613	0.0223697	-0.0543162	-0.101013	0.162986	0.0475629	0.0110209	0.000527573	0.012316	0.015758	0.0106592	0.0138516	0.447941	0.325877	0.509204	0.840253	0.665238	0.32788	0.1661	0.838952	0.999844
ENSFDAG00000000881	LAYN	-0.884716	-0.00826821	0.110327	-0.342735	-0.0195021	-0.0266016	0.0418171	0.0764182	0.00915698	0.000920868	0.0157844	0.019103	0.00905508	0.0118893	0.00137232	0.931145	0.000277272	0.00637185	0.88779	0.779821	0.701343	0.277617	0.999844
ENSFDAG00000000882	SPTLC2	0.107367	-0.129225	-0.0166724	0.378081	0.15222	0.175105	-0.191145	0.148997	0.0345245	0.00165269	0.0385815	0.0493638	0.0333913	0.0433918	0.780896	0.486755	0.681724	0.0542494	0.493267	0.337933	0.358822	0.510986	0.999844
ENSFDAG00000000885	NCKIPSD	0.975351	-0.287422	-0.10744	0.0648697	-0.0608533	0.235462	0.176635	0.343754	0.0796523	0.00381296	0.0890125	0.113889	0.0770379	0.10011	0.0962017	0.308486	0.0818685	0.827874	0.856901	0.396251	0.576666	0.838154	0.999844
ENSFDAG00000000886	TRPC4	-0.194472	-1.21134	0.0912321	-0.738729	0.066839	0.176947	0.22668	0.546615	0.126658	0.00606312	0.141542	0.181098	0.122501	0.159189	0.792523	0.000664842	0.241336	0.0495818	0.875195	0.613165	0.569938	0.498478	0.999844
ENSFDAG00000000891	ADO	0.207245	-0.579043	-0.0174986	0.283476	0.415171	0.156197	0.307319	0.46791	0.108421	0.00519011	0.121162	0.155022	0.104862	0.136268	0.761911	0.078654	0.808088	0.41542	0.291673	0.629558	0.405118	0.761033	0.999844
ENSFDAG00000000896	FKBP1B	-0.373236	-0.223207	0.0451948	0.252063	0.031916	0.143224	0.035207	0.104981	0.0243255	0.00116446	0.027184	0.034781	0.023527	0.0305733	0.249347	0.152395	0.185363	0.126313	0.864118	0.350432	0.840423	0.626849	0.999844
ENSFDAG00000000901	MLF2	0.168802	-0.201472	-0.0146891	-0.0208888	0.058083	0.10264	0.131413	0.204259	0.0473295	0.00226567	0.0528913	0.0676727	0.045776	0.0594857	0.708778	0.354403	0.757626	0.927629	0.823321	0.631419	0.59002	0.855734	0.999844
ENSFDAG00000000904	RF00609	-0.075449	-0.53594	0.0189608	0.613561	0.261986	0.187114	-0.234327	0.680623	0.157709	0.00754956	0.176242	0.225496	0.152533	0.198216	0.927132	0.177162	0.827257	0.143875	0.581149	0.631869	0.598663	0.638163	0.999844
ENSFDAG00000000906	ABRAXAS2	-0.005162	0.152466	-0.00239521	-0.0433908	-0.117655	-0.0856726	-0.000378017	0.0471784	0.0109319	0.000523309	0.0122165	0.0156306	0.010573	0.0137396	0.98104	0.144777	0.91661	0.694632	0.346669	0.40474	0.997427	0.824523	0.999844
ENSFDAG00000000909	PORCN	0.122725	0.00545615	-0.0127375	-0.04538	0.0358319	0.0797928	-0.159998	0.119063	0.0275884	0.00132066	0.0308304	0.0394465	0.0266829	0.0346743	0.722089	0.973795	0.725964	0.79606	0.856829	0.62521	0.390213	0.837152	0.999844
ENSFDAG00000000911	PDCD4	-0.616806	0.254181	0.0378383	0.892278	0.0444978	0.00424315	-0.00771368	0.259287	0.0600802	0.00287605	0.0671404	0.085904	0.0581082	0.0755114	0.225773	0.299737	0.480462	0.000574099	0.879328	0.985956	0.977606	0.113377	0.999844
ENSFDAG00000000913	COBLL1	-1.12667	0.563757	0.120801	-0.42847	-0.227502	-0.208929	-0.0883752	0.223152	0.0201357	0.00274475	0.0429926	0.0504265	0.0200596	0.0263409	0.017077	7.1e-05	0.0211221	0.0387868	0.311008	0.140171	0.586082	0.472875	0.999844
ENSFDAG00000000917	CCL8	0.0392582	0.0985971	-0.0809507	2.88123	1.98118	-0.405284	-0.00963697	4.05661	0.184828	0.0512848	0.7023	0.768511	0.18624	0.244077	0.984449	0.818604	0.720748	0.000585854	0.0238245	0.347667	0.984437	0.113535	0.89
ENSFDAG00000000919	ENSFDAG00000000919	0.300995	-0.0706035	-0.0309084	-0.0174053	0.026332	-0.0272264	0.0242312	0.0601406	0.0139354	0.000667087	0.0155729	0.0199251	0.013478	0.0175145	0.219684	0.549779	0.231424	0.889075	0.852017	0.814582	0.854724	0.845618	0.999844
ENSFDAG00000000921	RF01891	-0.413739	0.488712	0.0173512	-0.180217	-0.0757327	0.224491	0.221353	0.102792	0.0238183	0.00114018	0.0266172	0.0340559	0.0230365	0.0299358	0.196889	0.00154214	0.607352	0.269324	0.681526	0.139119	0.200773	0.723925	0.999844
ENSFDAG00000000925	RF00611	0.821477	-0.153234	-0.0654681	-0.51302	0.0999209	-0.00669661	-0.615666	0.414551	0.0960569	0.00459825	0.107345	0.137344	0.092904	0.120728	0.202001	0.621014	0.334316	0.117389	0.787453	0.982472	0.0764103	0.613396	0.999844
ENSFDAG00000000929	ERC1	0.0269545	-0.0285176	-0.00305837	-0.130517	-0.00816882	0.0490867	0.130694	0.047975	0.0111164	0.000532145	0.0124228	0.0158945	0.0107516	0.0139716	0.902058	0.786793	0.894526	0.241598	0.948338	0.635928	0.268863	0.713101	0.999844
ENSFDAG00000000930	FBXO42	0.0717023	-0.0823034	-0.00647824	0.0874361	-0.181783	0.080578	0.0656011	0.118886	0.0275475	0.0013187	0.0307847	0.039388	0.0266433	0.0346228	0.835265	0.619979	0.858412	0.618246	0.359694	0.621551	0.72442	0.808274	0.999844
ENSFDAG00000000933	ENSFDAG00000000933	-0.250034	0.0219791	0.0290942	-0.140217	0.0202771	0.00179174	0.0789987	0.0342887	0.00794514	0.000380334	0.0088788	0.0113601	0.00768436	0.00998579	0.176927	0.805233	0.13574	0.136731	0.849116	0.983693	0.429207	0.634955	0.999844
ENSFDAG00000000935	RF00001	0.372488	0.294498	-0.0695537	-0.233856	-0.0516856	0.371196	0.319294	0.80075	0.185544	0.00888202	0.207348	0.265295	0.179454	0.2332	0.677221	0.494171	0.460506	0.607554	0.920069	0.380895	0.508491	0.806984	0.999844
ENSFDAG00000000936	VPS52	0.17239	-0.288081	-0.0113722	0.0362683	-0.022583	0.0205998	0.232008	0.0997124	0.0231047	0.00110602	0.0258197	0.0330355	0.0223463	0.0290389	0.585113	0.0580605	0.732388	0.821427	0.901118	0.890395	0.173361	0.838154	0.999844
ENSFDAG00000000937	FOSL1	0.335657	-0.266413	-0.0280984	-0.1616	0.129197	-0.00989234	0.220881	0.169208	0.0392076	0.00187687	0.043815	0.0560599	0.0379207	0.0492778	0.414505	0.178478	0.516609	0.4401	0.585296	0.959485	0.319726	0.768006	0.999844
ENSFDAG00000000939	ENSFDAG00000000939	0.106737	-0.00985693	-0.00794841	-0.155903	0.0817013	-0.0533652	-0.0216792	0.069595	0.0161261	0.000771956	0.0180211	0.0230574	0.0155967	0.0202679	0.685772	0.93813	0.774819	0.245499	0.590541	0.669155	0.878967	0.713943	0.999844
ENSFDAG00000000940	RANBP3L	-0.0434735	0.429448	-0.0262313	0.150911	0.383573	0.259332	-0.281875	0.304437	0.070542	0.00337685	0.0788316	0.100862	0.0682266	0.0886601	0.937199	0.105897	0.651699	0.590928	0.227137	0.320789	0.343813	0.805553	0.999844
ENSFDAG00000000942	SLC38A1	-0.151066	-0.187719	0.021799	-0.133354	0.262455	0.216551	-0.0755987	0.176094	0.0408034	0.00195326	0.0455983	0.0583415	0.0394641	0.0512834	0.718852	0.352728	0.621844	0.532301	0.277218	0.275677	0.738508	0.791775	0.999844
ENSFDAG00000000951	PDZD8	0.00504465	0.00111936	0.0103845	-0.269678	-0.0401182	-0.208634	0.0038823	0.112553	0.0260799	0.00124845	0.0291446	0.0372896	0.0252239	0.0327783	0.988003	0.99447	0.768833	0.114183	0.835422	0.188966	0.982892	0.61005	0.999844
ENSFDAG00000000956	MAP9	-0.268209	-0.114002	0.0384975	-0.0856112	-0.119048	0.100987	-0.0243753	0.054412	0.012608	0.000603544	0.0140896	0.0180271	0.0121941	0.0158462	0.250223	0.309969	0.117107	0.47076	0.375262	0.360448	0.84646	0.776032	0.999844
ENSFDAG00000000957	RF00277	-0.0601154	0.262224	-0.00504957	0.253462	-0.764366	0.416415	-0.263014	0.630188	0.146023	0.00699012	0.163182	0.208786	0.14123	0.183528	0.939636	0.492575	0.95184	0.530367	0.0943618	0.267836	0.539253	0.791153	0.999844
ENSFDAG00000000959	GALNT7	-0.357958	0.242643	0.0394157	-0.262517	-0.0416492	-0.170822	0.00618131	0.0603447	0.0139826	0.00066935	0.0156258	0.0199927	0.0135237	0.017574	0.145067	0.0401714	0.127634	0.0357217	0.768331	0.141856	0.96281	0.467165	0.999844
ENSFDAG00000000960	RF00085	0.577053	-0.187339	-0.0510282	0.0250934	0.0711013	-0.0298657	-0.399287	0.572219	0.132591	0.00634712	0.148172	0.189581	0.128239	0.166645	0.445558	0.606915	0.521845	0.948023	0.870284	0.933534	0.328019	0.859335	0.999844
ENSFDAG00000000961	COX15	-0.103232	0.0442354	0.0126286	0.00294797	-0.0627304	-0.0673228	-0.0146839	0.0210934	0.00488761	0.00023397	0.00546196	0.0069884	0.00472718	0.00614295	0.477214	0.526907	0.409027	0.968182	0.453017	0.327492	0.851387	0.860841	0.999844
ENSFDAG00000000962	ENSFDAG00000000962	-0.112934	0.123066	0.0117579	-0.0392841	-0.0637362	-0.0369373	-0.109447	0.0464134	0.0107546	0.000514823	0.0120184	0.0153771	0.0104016	0.0135168	0.600134	0.235345	0.604317	0.72009	0.607264	0.717223	0.346509	0.826038	0.999844
ENSFDAG00000000963	ENSFDAG00000000963	0.806134	-1.44615	-0.0356924	0.545335	-1.60564	-0.354086	1.95674	2.77625	0.643293	0.0307945	0.718888	0.919794	0.622178	0.808518	0.628518	0.0713801	0.838827	0.520107	0.0940937	0.653502	0.0295443	0.789669	0.999844
ENSFDAG00000000964	ARHGEF12	0.0212876	-0.0369019	0.00965342	-0.243142	-0.0179054	-0.218859	0.0251446	0.0273258	0.00633173	0.000303101	0.0070758	0.00905325	0.00612391	0.00795799	0.897533	0.642825	0.579249	0.00384629	0.850733	0.00516241	0.778046	0.227371	0.999844
ENSFDAG00000000965	TSPAN31	-0.869792	0.280295	0.0961663	-0.072318	-0.176091	-0.109788	-0.0431832	0.0746203	0.0103554	0.00088678	0.0160846	0.019775	0.0101945	0.0133765	0.00145204	0.00587933	0.00124073	0.56853	0.210491	0.27688	0.70887	0.801544	0.999844
ENSFDAG00000000974	ENSFDAG00000000974	-0.821068	0.212323	0.0874739	-0.141246	-0.0328117	0.00120737	0.0093941	0.133488	0.0309309	0.00148066	0.0345656	0.0442256	0.0299156	0.0388752	0.0246217	0.227331	0.0230102	0.447422	0.876014	0.99443	0.961999	0.770029	0.999844
ENSFDAG00000000975	DDR2	-0.451825	-0.199442	0.0653842	-0.386875	0.081092	0.0425067	0.188483	0.216445	0.0501532	0.00240084	0.0560468	0.07171	0.048507	0.0630346	0.331462	0.373159	0.182067	0.102224	0.762025	0.84696	0.452816	0.593037	0.999844
ENSFDAG00000000985	ENSFDAG00000000985	-0.0966797	-0.197173	0.0227619	-0.0708478	0.238903	-0.0841361	-0.0564053	0.0373541	0.00865543	0.000414336	0.00967256	0.0123757	0.00837134	0.0108785	0.616916	0.0340611	0.263468	0.471297	0.0317521	0.357797	0.588646	0.776237	0.922231
ENSFDAG00000000989	ENSFDAG00000000989	-0.355652	-0.178902	0.0352721	0.113885	0.522968	-0.00360406	0.195725	0.213719	0.0495215	0.0023706	0.055341	0.0708069	0.0478961	0.0622408	0.441707	0.421437	0.468796	0.628309	0.0493753	0.986861	0.43273	0.809444	0.999844
ENSFDAG00000000992	AK3	-0.301157	-0.0134929	0.0356514	0.116381	0.0193478	-0.0247544	-0.103668	0.0498552	0.0115521	0.000553	0.0129096	0.0165174	0.0111729	0.0145192	0.177412	0.900097	0.129507	0.305697	0.880336	0.814837	0.389595	0.737181	0.999844
ENSFDAG00000000996	ENSFDAG00000000996	-0.100561	0.0810785	0.0171991	0.222146	0.439208	-0.488037	-0.404508	0.276332	0.0640297	0.00306511	0.0715541	0.0915511	0.0619281	0.0804753	0.848291	0.748653	0.756061	0.406276	0.146621	0.0498626	0.153891	0.759102	0.999844
ENSFDAG00000000997	NFIL3	-0.238724	0.126579	0.0251045	-0.0679268	0.0575858	-0.0750513	-0.0475224	0.0574635	0.013315	0.000637392	0.0148797	0.0190381	0.012878	0.0167349	0.319317	0.27266	0.320042	0.577625	0.67642	0.508385	0.713354	0.803968	0.999844
ENSFDAG00000000998	GTPBP4	0.0332798	0.0472216	-0.00337781	-0.137602	-0.0254952	-0.0215042	0.0516971	0.0408819	0.00947288	0.000453467	0.0105861	0.0135445	0.00916195	0.0119059	0.869263	0.627551	0.873967	0.181095	0.826598	0.822242	0.63565	0.672252	0.999844
ENSFDAG00000001001	REPIN1	0.86784	-0.156085	-0.111151	0.183428	-0.0735731	0.602906	0.106816	0.673795	0.156127	0.00747381	0.174474	0.223234	0.151002	0.196227	0.2904	0.692826	0.198547	0.660562	0.876255	0.120777	0.809451	0.816736	0.999844
ENSFDAG00000001006	ENSFDAG00000001006	-0.907842	0.253904	0.0622306	1.02396	0.319615	0.00856767	0.242569	1.14755	0.265903	0.0127288	0.29715	0.380194	0.257175	0.334198	0.396734	0.622444	0.581234	0.0603232	0.604213	0.986521	0.674779	0.52797	0.999844
ENSFDAG00000001008	KIF9	-0.263152	0.24478	0.0191259	-0.0564701	-0.113632	0.0867191	-0.0232256	0.0754266	0.0174773	0.00083664	0.0195311	0.0249894	0.0169037	0.0219662	0.337976	0.0640887	0.508465	0.686162	0.472251	0.504773	0.875476	0.822066	0.999844
ENSFDAG00000001015	ENSFDAG00000001015	-0.202386	0.194392	0.00817644	-0.340419	0.398909	0.0613989	0.195872	0.282504	0.0654599	0.00313357	0.0731523	0.0935959	0.0633113	0.0822727	0.70337	0.447384	0.883871	0.208162	0.192267	0.807218	0.494683	0.686546	0.999844
ENSFDAG00000001016	USP30	0.00318557	-0.321776	0.00356247	0.345398	0.202229	-0.0621438	0.158404	0.149544	0.0346514	0.00165876	0.0387234	0.0495453	0.033514	0.0435513	0.993427	0.0838811	0.930298	0.0792203	0.363595	0.734266	0.447829	0.567662	0.999844
ENSFDAG00000001020	PNRC1	-0.562576	-0.0435869	0.0505754	0.724491	0.364098	-0.0313	0.0286488	0.671645	0.0591918	0.00827268	0.128747	0.150616	0.0590002	0.0774721	0.492427	0.857817	0.578175	0.0434735	0.348157	0.897469	0.91802	0.488196	0.999844
ENSFDAG00000001021	ZC3H8	0.0230663	0.123189	-0.00740746	-0.0521184	-0.0292105	0.0617563	-0.0771757	0.0406471	0.00941846	0.000450862	0.0105252	0.0134667	0.00910932	0.0118375	0.908913	0.204316	0.727197	0.611444	0.801262	0.517599	0.478118	0.808022	0.999844
ENSFDAG00000001022	ENSFDAG00000001022	-0.0414218	0.119367	0.00192531	-0.0625482	-0.116086	-0.0558119	0.0607784	0.181655	0.0420918	0.00201494	0.0470382	0.0601838	0.0407103	0.0529028	0.922578	0.560689	0.965788	0.773044	0.636075	0.782076	0.79159	0.832796	0.999844
ENSFDAG00000001023	SLCO3A1	0.797964	-0.547112	-0.0692788	0.00585908	0.0206564	0.0140334	0.185911	0.320658	0.0743007	0.00355678	0.083032	0.106237	0.0718619	0.0933843	0.158786	0.0447339	0.245381	0.983778	0.949468	0.95825	0.542942	0.861287	0.999844
ENSFDAG00000001028	HMGXB3	0.524227	-0.261547	-0.0597941	0.181487	0.00898239	0.171133	0.18412	0.192255	0.0445479	0.00213251	0.0497829	0.0636956	0.0430857	0.0559897	0.231859	0.215278	0.195379	0.415986	0.971609	0.40968	0.436499	0.761033	0.999844
ENSFDAG00000001030	RF00274	0.954789	-0.755362	-0.0783121	-0.468394	0.366095	0.623578	-0.154877	0.592975	0.1374	0.00657735	0.153546	0.196457	0.13289	0.17269	0.21501	0.0415699	0.334237	0.231954	0.408826	0.087158	0.709376	0.70828	0.999844
ENSFDAG00000001031	FZD4	-0.336855	-0.287826	0.0686082	0.0118187	-0.440256	-0.295197	-0.00372071	0.28341	0.0656698	0.00314362	0.0733868	0.093896	0.0635143	0.0825365	0.526894	0.261364	0.22108	0.965201	0.150789	0.241469	0.989667	0.860841	0.999844
ENSFDAG00000001032	MRPL41	-0.0622917	0.166795	0.00380365	-0.0618992	0.0308955	-0.00579974	-0.158213	0.0957153	0.0221785	0.00106168	0.0247847	0.0317112	0.0214505	0.0278748	0.840429	0.262716	0.90707	0.694186	0.862262	0.968412	0.34332	0.824523	0.999844
ENSFDAG00000001036	RAB40C	0.020956	-0.0770272	-0.00554064	0.374921	-0.107348	0.0952012	-0.0750686	0.226666	0.0525215	0.00251421	0.0586934	0.0750963	0.0507976	0.0660112	0.964891	0.736791	0.912013	0.121731	0.69526	0.672735	0.77015	0.620397	0.999844
ENSFDAG00000001037	GALK2	0.249255	-0.0448342	-0.0324898	0.18028	0.204296	0.0729264	-0.139195	0.076906	0.0178201	0.00085305	0.0199142	0.0254796	0.0172352	0.0223971	0.368759	0.736979	0.265967	0.201421	0.200593	0.578559	0.352321	0.68117	0.999844
ENSFDAG00000001038	ENSFDAG00000001038	-0.308432	0.00588305	0.0403524	-0.141113	0.0605233	-0.0491185	-0.0276726	0.0643933	0.0149208	0.000714258	0.0166742	0.021334	0.014431	0.0187531	0.224192	0.961587	0.131075	0.274477	0.678605	0.682627	0.839858	0.726885	0.999844
ENSFDAG00000001039	SLC35A3	-0.615786	0.159475	0.0606974	-0.0224715	0.261946	0.0815861	-0.143628	0.133778	0.0309981	0.00148388	0.0346408	0.0443218	0.0299807	0.0389598	0.0922604	0.36505	0.115098	0.9039	0.213412	0.637505	0.466819	0.851178	0.999844
ENSFDAG00000001040	RF02109	0.434632	-0.358923	-0.0430845	0.621075	-0.201295	0.0433322	0.0250211	0.533621	0.123647	0.00591899	0.138177	0.176793	0.119588	0.155405	0.551854	0.307384	0.575471	0.0947601	0.632123	0.900283	0.949392	0.58503	0.999844
ENSFDAG00000001045	ELMOD1	-1.64958	1.24889	0.163621	-0.496867	0.381342	-0.728049	-0.747182	1.2128	0.281022	0.0134525	0.314045	0.401811	0.271798	0.3532	0.134162	0.0184783	0.158331	0.375277	0.547444	0.162567	0.208669	0.74787	0.999844
ENSFDAG00000001047	MXD3	0.423859	0.10158	-0.0593253	0.0492902	-0.210652	0.167177	0.101205	0.175004	0.0405508	0.00194117	0.045316	0.0579804	0.0392198	0.050966	0.310963	0.613953	0.178139	0.816892	0.381665	0.39858	0.653941	0.838154	0.999844
ENSFDAG00000001051	SOCS2	0.126177	-0.868681	0.0145165	0.0122975	-0.0800059	0.338518	0.44995	0.0817815	0.0189498	0.000907131	0.0211767	0.0270949	0.0183279	0.023817	0.659057	2.78e-10	0.629822	0.932654	0.626934	0.012402	0.00355059	0.855871	0.999844
ENSFDAG00000001057	ENSFDAG00000001057	0.247255	-0.124758	-0.0328633	0.131775	0.230455	0.0795076	0.0679799	0.198789	0.0460621	0.002205	0.051475	0.0658605	0.0445502	0.0578928	0.579196	0.561041	0.484018	0.561368	0.369188	0.706404	0.777535	0.798175	0.999844
ENSFDAG00000001060	ST6GALNAC3	-0.654472	-0.50403	0.103768	0.626862	-0.415716	-0.139475	-0.234454	0.25796	0.0597727	0.00286132	0.0667968	0.0854642	0.0578108	0.0751248	0.197541	0.0392454	0.0523913	0.015289	0.155022	0.561858	0.392334	0.36784	0.999844
ENSFDAG00000001073	TTI1	0.279176	-0.0734403	-0.0332172	-0.00926438	0.0878559	0.0937622	0.035655	0.0684562	0.0158622	0.000759325	0.0177262	0.0226801	0.0153416	0.0199363	0.285964	0.559817	0.228029	0.944525	0.55964	0.449053	0.800638	0.859044	0.999844
ENSFDAG00000001076	B4GALT7	0.183935	0.00748969	-0.0245266	0.0957654	-0.00884895	0.0861743	-0.0642366	0.0468526	0.0108563	0.000519694	0.0121321	0.0155226	0.0105	0.0136447	0.395456	0.942696	0.281981	0.384606	0.943378	0.400362	0.582373	0.751334	0.999844
ENSFDAG00000001078	ABHD6	1.01287	-0.325016	-0.10711	0.156584	-0.193244	0.236201	-0.0326821	0.250298	0.0579972	0.00277633	0.0648127	0.0829257	0.0560936	0.0728934	0.0429143	0.177149	0.042072	0.538514	0.502183	0.318619	0.903651	0.792978	0.999844
ENSFDAG00000001080	RF00607	-0.142695	-0.0527458	0.00766921	0.07914	0.70724	-0.0429031	-0.00936526	0.66273	0.153563	0.00735108	0.171609	0.219568	0.148523	0.193005	0.860857	0.892928	0.928725	0.848494	0.131216	0.911359	0.982992	0.839422	0.999844
ENSFDAG00000001083	CASP9	0.400969	-0.278665	-0.062914	-0.0373511	0.202127	0.802443	0.369086	0.642516	0.148879	0.00712687	0.166375	0.212871	0.143993	0.187118	0.616914	0.470163	0.456125	0.927039	0.661319	0.0344575	0.393527	0.855734	0.999844
ENSFDAG00000001086	WDR89	0.0615025	0.0340845	-0.00554695	-0.104854	0.00785488	-0.0829531	0.0353415	0.0428477	0.00992837	0.000475272	0.0110951	0.0141958	0.00960249	0.0124784	0.766377	0.732296	0.799157	0.319518	0.947436	0.397259	0.751716	0.738574	0.999844
ENSFDAG00000001089	ASH2L	0.54054	-0.108481	-0.0695122	0.136479	0.0396569	0.150803	0.211388	0.129236	0.0299457	0.00143351	0.0334647	0.042817	0.0289628	0.0376371	0.132681	0.530735	0.0663645	0.455633	0.848016	0.375557	0.275883	0.770718	0.999844
ENSFDAG00000001091	DPYSL2	0.585646	0.299474	-0.0914051	0.0365778	0.161965	0.251073	-0.00932409	0.397627	0.0921354	0.00441053	0.102963	0.131737	0.0891113	0.1158	0.35302	0.323833	0.168717	0.909243	0.655426	0.400308	0.978141	0.851868	0.999844
ENSFDAG00000001092	ENSFDAG00000001092	-0.0264896	-0.208106	0.0133534	-0.0825345	-0.107869	0.112135	0.0833972	0.085817	0.0198849	0.000951892	0.0222216	0.0284319	0.0192322	0.0249922	0.927949	0.140001	0.665152	0.579808	0.522351	0.418752	0.597824	0.804309	0.999844
ENSFDAG00000001094	PPP4R3A	0.124533	-0.0950689	-0.00896938	-0.0306104	0.0259256	-0.0440928	0.0391596	0.0501022	0.0116093	0.000555739	0.0129736	0.0165993	0.0112283	0.0145911	0.577964	0.377594	0.703592	0.788126	0.840522	0.677328	0.745797	0.83494	0.999844
ENSFDAG00000001096	GPATCH11	-0.226262	0.248377	0.0153242	0.0919581	-0.128979	0.01791	-0.114955	0.04144	0.00960218	0.000459657	0.0107306	0.0137294	0.009287	0.0120684	0.266361	0.0112543	0.474756	0.374688	0.271002	0.852564	0.295369	0.747717	0.999844
ENSFDAG00000001097	RF00284	0.597611	0.224182	-0.0975934	0.251441	0.0137053	0.566482	-0.198834	0.85817	0.198849	0.00951892	0.222216	0.284319	0.192322	0.249922	0.518857	0.615151	0.317169	0.593762	0.979494	0.196451	0.690829	0.805944	0.999844
ENSFDAG00000001109	FBXO25	-0.0661459	0.232869	-0.00398041	0.149461	-0.112484	0.00131324	-0.107428	0.0167493	0.00388104	0.000185786	0.00433711	0.00554919	0.00375365	0.00487785	0.609282	0.000185497	0.770267	0.0232387	0.131045	0.982899	0.124009	0.410989	0.999844
ENSFDAG00000001112	ENSFDAG00000001112	0.290319	-0.502413	-0.0389351	1.08456	0.510479	0.0237158	0.236551	0.391866	0.0477819	0.00471495	0.0813322	0.0986193	0.0472261	0.0620049	0.64281	0.0215381	0.570697	0.000142966	0.104048	0.913099	0.342125	0.0768459	0.999844
ENSFDAG00000001114	CTSK	-0.389764	0.17662	0.0243536	0.345856	0.412286	-0.0425826	-0.0425899	0.182171	0.0422113	0.00202066	0.0471717	0.0603546	0.0408258	0.053053	0.361141	0.389977	0.587976	0.111293	0.0933083	0.833083	0.853303	0.606898	0.999844
ENSFDAG00000001117	ACVR2A	-0.360291	-0.601023	0.0748033	0.0405351	-0.124849	-0.193392	0.198708	0.0883838	0.0204797	0.000980364	0.0228863	0.0292823	0.0198075	0.0257397	0.22555	2.67e-05	0.0168915	0.788743	0.465638	0.169405	0.215512	0.83494	0.999844
ENSFDAG00000001118	EMC9	0.400646	-0.0933282	-0.0406199	0.00689989	0.113822	-0.0312818	-0.0687703	0.0837833	0.0194137	0.000929334	0.021695	0.0277581	0.0187765	0.0243999	0.166313	0.502972	0.18271	0.962637	0.494497	0.819422	0.659751	0.860841	0.999844
ENSFDAG00000001122	FAM210B	-0.0602828	-0.0351782	0.0184646	-0.136641	0.0176135	-0.203898	-0.0758239	0.0941061	0.0218056	0.00104384	0.024368	0.0311781	0.0210899	0.0274062	0.844211	0.811705	0.567654	0.381396	0.920541	0.16031	0.64694	0.74978	0.999844
ENSFDAG00000001123	ZBTB33	-0.0607658	-0.100172	0.0109351	0.0712568	-0.00718191	-0.196436	0.159082	0.128999	0.0298907	0.00143087	0.0334032	0.0427383	0.0289096	0.0375679	0.86565	0.562318	0.772519	0.696625	0.972287	0.247961	0.411788	0.825038	0.999844
ENSFDAG00000001127	ATXN7L1	0.407092	-0.142798	-0.0494585	0.140687	-0.158784	0.368366	-0.0889752	0.339781	0.0787316	0.00376889	0.0879835	0.112572	0.0761474	0.0989532	0.484938	0.610809	0.420457	0.635287	0.636033	0.181906	0.777293	0.810842	0.999844
ENSFDAG00000001130	ENSFDAG00000001130	-0.829658	0.212226	0.0909632	0.128088	-0.0834186	-0.14144	-0.168226	0.0824009	0.0190934	0.000914	0.0213371	0.0273001	0.0184667	0.0239973	0.00384955	0.124568	0.00262285	0.380552	0.613649	0.297956	0.2775	0.749537	0.999844
ENSFDAG00000001137	IFT27	-0.175152	0.0909859	0.0169073	0.0772335	-0.120314	-0.0293078	-0.0219062	0.0754362	0.0174795	0.000836747	0.0195336	0.0249926	0.0169058	0.021969	0.523661	0.491333	0.55889	0.580534	0.446629	0.821664	0.882504	0.804309	0.999844
ENSFDAG00000001139	LNX2	0.0386263	-0.183294	0.000520042	0.220086	-0.116195	-0.117429	0.147735	0.127509	0.0295455	0.00141435	0.0330175	0.0422447	0.0285757	0.037134	0.91386	0.286263	0.988967	0.225814	0.571851	0.487265	0.443289	0.702928	0.999844
ENSFDAG00000001140	DDX20	-0.120223	-0.0806505	0.0192265	0.107332	-0.0359827	-0.13139	0.0180516	0.029034	0.00672756	0.000322049	0.00751813	0.0096192	0.00650674	0.00845548	0.480462	0.325468	0.284002	0.215766	0.713708	0.103345	0.844366	0.694209	0.999844
ENSFDAG00000001146	THBS1	-0.368191	-0.183139	0.0604868	-0.152482	-0.132939	-0.173513	0.0938907	0.121074	0.0280545	0.00134297	0.0313513	0.0401129	0.0271337	0.0352601	0.289988	0.274219	0.0988314	0.389141	0.506844	0.292176	0.617066	0.752439	0.999844
ENSFDAG00000001149	NPRL3	0.343185	-0.323506	-0.0307939	0.0596227	-0.00906303	0.151094	0.128978	0.16199	0.0375352	0.00179681	0.0419461	0.0536686	0.0363032	0.0471758	0.39384	0.0949606	0.467556	0.770962	0.968794	0.427777	0.55263	0.832563	0.999844
ENSFDAG00000001153	TENT5C	0.771002	-0.66573	-0.0803178	0.441943	0.754428	0.280907	-0.167747	0.98848	0.229044	0.0109643	0.255959	0.327491	0.221526	0.287872	0.438055	0.164214	0.443055	0.382371	0.1874	0.550621	0.754548	0.749887	0.999844
ENSFDAG00000001158	PHF7	0.280981	0.474506	-0.0506399	0.122245	-0.201616	0.173747	-0.5001	0.260408	0.0603399	0.00288848	0.0674306	0.0862752	0.0583594	0.0758377	0.581896	0.0533968	0.346074	0.637811	0.492456	0.472005	0.0693713	0.812173	0.999844
ENSFDAG00000001160	PRKAR1A	0.00761695	-0.175735	0.0119984	-0.0543386	-0.0255145	-0.131135	0.0582734	0.0423513	0.00981335	0.000469766	0.0109665	0.0140313	0.00949124	0.0123338	0.970475	0.0760654	0.579863	0.603839	0.829459	0.17829	0.599783	0.806406	0.999844
ENSFDAG00000001164	TSKU	-0.402608	0.460288	0.0222388	-0.0167984	0.100026	0.00151854	-0.0352231	0.212565	0.049254	0.00235779	0.055042	0.0704244	0.0476373	0.0619045	0.382529	0.0380793	0.646958	0.942919	0.70623	0.994449	0.887421	0.858573	0.999844
ENSFDAG00000001165	RLF	-0.149041	-0.0690722	0.0151636	0.316514	-0.0669114	-0.0928558	0.0788932	0.0593186	0.0137449	0.000657969	0.0153601	0.0196527	0.0132937	0.0172752	0.540576	0.555754	0.554418	0.0106538	0.633151	0.420617	0.548343	0.325767	0.999844
ENSFDAG00000001168	FAM122A	-0.0764604	-0.192963	0.00549619	0.54584	0.0298616	-0.013899	0.0744004	0.104447	0.0242018	0.00115854	0.0270458	0.0346042	0.0234074	0.0304178	0.812978	0.214839	0.871719	0.000903207	0.872466	0.927615	0.669678	0.136015	0.999844
ENSFDAG00000001169	PIKFYVE	-0.182184	-0.150747	0.0125628	0.381937	0.26947	0.0247222	0.141288	0.141693	0.032832	0.00157167	0.0366902	0.0469439	0.0317544	0.0412647	0.628394	0.405434	0.751329	0.0461562	0.213604	0.88966	0.486722	0.494271	0.999844
ENSFDAG00000001171	CEP120	-0.142033	0.0801951	0.014951	-0.0210819	0.0133982	-0.0512905	-0.0362876	0.0792523	0.0183638	0.000879076	0.0205218	0.0262569	0.017761	0.0230804	0.613893	0.553992	0.614076	0.883002	0.934102	0.700341	0.811217	0.844995	0.999844
ENSFDAG00000001177	SMIM15	0.0777914	0.200154	-0.0149281	-0.0414015	-0.0674842	-0.0381112	-0.0826118	0.0445843	0.0103308	0.000494535	0.0115448	0.0147711	0.00999168	0.0129841	0.712562	0.0489255	0.502039	0.699999	0.578718	0.703002	0.468454	0.82511	0.999844
ENSFDAG00000001178	NOC4L	0.215742	-0.25161	-0.0119619	-0.1154	-0.0493195	-0.00691182	0.16813	0.0775108	0.0179603	0.000859759	0.0200708	0.02568	0.0173708	0.0225732	0.438391	0.0604546	0.683307	0.415326	0.75826	0.958176	0.263121	0.761033	0.999844
ENSFDAG00000001181	NT5C2	0.0750704	-0.0385972	-0.000820641	-0.0784615	-0.18883	-0.0460157	-0.0154331	0.0192662	0.00446424	0.000213704	0.00498885	0.00638306	0.00431771	0.00561084	0.588617	0.563484	0.955233	0.266631	0.0181032	0.483745	0.836764	0.721451	0.819623
ENSFDAG00000001182	CNOT7	-0.21297	0.133472	0.0210009	-0.0666233	0.00522993	-0.0584758	-0.0109694	0.0575687	0.0133394	0.000638559	0.014907	0.019073	0.0129016	0.0167656	0.374748	0.247831	0.405935	0.585292	0.969792	0.606679	0.932486	0.804309	0.999844
ENSFDAG00000001185	RF00026	-0.316464	0.597686	0.0158023	0.270074	-0.790324	-0.0485049	-0.190814	0.689364	0.159735	0.00764651	0.178505	0.228392	0.154492	0.200761	0.703089	0.134795	0.856593	0.522673	0.0981823	0.901786	0.670207	0.789669	0.999844
ENSFDAG00000001189	RF00001	-0.301473	0.0375159	0.0231751	-0.116866	0.0395544	0.437954	0.0604622	0.112851	0.0261491	0.00125176	0.0292219	0.0373885	0.0252908	0.0328653	0.369496	0.816538	0.512448	0.494196	0.837914	0.00588911	0.738746	0.784098	0.999844
ENSFDAG00000001200	MCC	-1.54316	0.345607	0.173344	-0.53738	0.0820935	-0.252077	0.190693	0.309973	0.0718247	0.00343825	0.080265	0.102696	0.0694672	0.0902723	0.00557616	0.1972	0.00311411	0.0578561	0.797818	0.338867	0.525634	0.52151	0.999844
ENSFDAG00000001203	IFNAR1	-0.0406114	0.0221351	-0.00218291	0.144473	-0.0165948	0.059838	0.036589	0.102819	0.0238245	0.00114048	0.0266242	0.0340648	0.0230425	0.0299437	0.899216	0.885969	0.948462	0.375931	0.928357	0.693436	0.83254	0.748166	0.999844
ENSFDAG00000001207	EXOSC5	0.0904234	-0.0268168	-0.0115179	-0.0381005	0.0840878	0.0764388	0.00862247	0.0759137	0.0175902	0.000842044	0.0196573	0.0251508	0.0170128	0.0221081	0.742771	0.839764	0.691425	0.785814	0.595959	0.55785	0.953756	0.834195	0.999844
ENSFDAG00000001208	GEMIN5	0.104256	-0.264753	-0.00513307	-0.163769	0.0923145	0.118447	0.281925	0.0513428	0.0118968	0.000569501	0.0132948	0.0170103	0.0115063	0.0149524	0.645437	0.0152112	0.829693	0.155511	0.479066	0.269499	0.0211348	0.648382	0.999844
ENSFDAG00000001209	ENSFDAG00000001209	-0.0349298	0.190583	-0.00125361	-0.164024	0.090091	-0.0403879	-0.0637662	0.0777675	0.0180197	0.000862607	0.0201373	0.025765	0.0174283	0.022648	0.900321	0.155682	0.965954	0.247736	0.574618	0.759657	0.671772	0.715017	0.999844
ENSFDAG00000001213	ALYREF	0.404684	0.09718	-0.0541684	0.0751792	-0.000844053	-0.0065642	0.0622783	0.102403	0.0237282	0.00113587	0.0265166	0.0339271	0.0229494	0.0298226	0.206009	0.528121	0.108001	0.644312	0.996344	0.965438	0.718375	0.814799	0.999844
ENSFDAG00000001217	RPL8	0.201349	-0.114328	-0.0151493	-0.164614	0.0613952	-0.051866	0.0810622	0.0462739	0.0107223	0.000513275	0.0119823	0.0153309	0.0103703	0.0134762	0.349266	0.269548	0.503702	0.132627	0.62	0.610531	0.484997	0.629064	0.999844
ENSFDAG00000001219	MAML2	-0.309687	-0.436159	0.0679696	0.0263006	-0.184454	-0.285743	0.0046364	0.111979	0.0259471	0.00124209	0.0289962	0.0370997	0.0250954	0.0326114	0.35473	0.00677508	0.0537827	0.877253	0.338243	0.0712693	0.979517	0.843868	0.999844
ENSFDAG00000001226	ENSFDAG00000001226	0.275678	0.174522	-0.0495114	-0.0297696	0.215676	0.336596	-0.0716079	0.1503	0.0348264	0.00166714	0.0389189	0.0497954	0.0336832	0.0437712	0.477029	0.349695	0.225281	0.880054	0.333789	0.0666526	0.732149	0.844215	0.999844
ENSFDAG00000001232	TNFAIP8L3	-1.35872	0.509859	0.123486	0.435631	0.416636	0.0308426	-0.420244	0.881667	0.204294	0.00977955	0.228301	0.292103	0.197588	0.256765	0.147889	0.259305	0.211776	0.361913	0.440776	0.944683	0.40691	0.743431	0.999844
ENSFDAG00000001234	ALG14	-0.353205	0.125764	0.0418854	-0.201758	0.0271458	-0.106916	-0.015825	0.0447335	0.0103653	0.000496189	0.0115834	0.0148206	0.0100251	0.0130276	0.0949241	0.216726	0.06006	0.0608445	0.823549	0.2856	0.889729	0.529975	0.999844
ENSFDAG00000001241	MIA3	0.0788553	-0.130192	-0.00816812	0.11125	-0.0248761	0.150211	0.0176134	0.0790201	0.01831	0.0008765	0.0204616	0.02618	0.017709	0.0230127	0.779079	0.335979	0.782628	0.436729	0.877812	0.258996	0.907568	0.768006	0.999844
ENSFDAG00000001242	ENSFDAG00000001242	0.0671057	-0.0990724	-0.000995914	-0.0954598	0.000691663	-0.00629739	0.0581939	0.0713862	0.0165411	0.000791825	0.0184849	0.0236508	0.0159982	0.0207896	0.80169	0.441111	0.971767	0.482604	0.996412	0.960291	0.686505	0.780886	0.999844
ENSFDAG00000001245	BLOC1S2	-0.137766	0.19782	0.00797534	-0.0262907	0.038703	0.0256728	-0.138497	0.0441506	0.0102303	0.000489724	0.0114325	0.0146275	0.00989448	0.0128578	0.512049	0.050488	0.718555	0.805771	0.748963	0.796335	0.221938	0.838154	0.999844
ENSFDAG00000001248	BTBD10	-0.169758	-0.0350403	0.0284039	-0.0803531	-0.0309828	-0.198981	0.0216964	0.0403893	0.00935873	0.000448003	0.0104585	0.0133813	0.00905154	0.0117624	0.398285	0.717195	0.179611	0.432031	0.788825	0.0364865	0.841441	0.766288	0.999844
ENSFDAG00000001252	ENSFDAG00000001252	-0.227811	0.0146896	0.0293961	-0.0912555	0.114194	-0.0484534	-0.103941	0.023449	0.00543344	0.000260099	0.00607194	0.00776885	0.0052551	0.00682898	0.136833	0.842041	0.0683458	0.241557	0.195121	0.503881	0.208466	0.713101	0.999844
ENSFDAG00000001253	ARL8B	-0.132892	-0.00901872	0.0212041	-0.0808575	-0.028588	-0.109368	-0.0124963	0.0449205	0.0104087	0.000498264	0.0116318	0.0148825	0.010067	0.0130821	0.53065	0.92956	0.34215	0.453426	0.814721	0.275698	0.913	0.770408	0.999844
ENSFDAG00000001256	RNF141	-0.234953	0.207374	0.0249253	-0.0605064	-0.240969	-0.127362	-0.0137713	0.0510087	0.0118194	0.000565794	0.0132083	0.0168996	0.0114314	0.0148551	0.2982	0.0564598	0.294695	0.598558	0.0637915	0.233571	0.910039	0.806406	0.999844
ENSFDAG00000001257	ENSFDAG00000001257	-0.0878279	-0.0966979	0.0208103	-0.039381	-0.323076	-0.14148	0.183546	0.167655	0.0388478	0.00185965	0.0434129	0.0555453	0.0375727	0.0488255	0.830158	0.623704	0.629399	0.850087	0.17043	0.465456	0.406168	0.839671	0.999844
ENSFDAG00000001258	GLE1	0.239626	-0.180045	-0.0303566	0.36547	0.0473916	-0.0118732	0.199574	0.219293	0.050813	0.00243242	0.0567841	0.0726534	0.0491451	0.0638639	0.608855	0.424454	0.538219	0.125106	0.860434	0.957287	0.429687	0.623621	0.999844
ENSFDAG00000001267	ENSFDAG00000001267	-0.111106	0.0613691	0.0182862	-0.221789	-0.0369092	-0.128625	-0.000833345	0.0765324	0.0177336	0.000848907	0.0198175	0.0253558	0.0171515	0.0222883	0.687963	0.644912	0.530256	0.115143	0.816701	0.326029	0.995546	0.611026	0.999844
ENSFDAG00000001270	PPP2R2B	-1.67006	0.476608	0.194582	-0.446325	-0.417666	-0.437957	0.111614	0.494853	0.0952062	0.00564611	0.119206	0.151052	0.0926924	0.121091	0.0175929	0.122432	0.00960959	0.196111	0.282532	0.150292	0.748403	0.678929	0.999844
ENSFDAG00000001273	PSMG2	0.110079	0.0342738	-0.0159467	-0.0727658	0.0333204	0.080563	0.0209669	0.00979507	0.00226964	0.000108648	0.00253636	0.00324518	0.00219515	0.00285258	0.266034	0.471881	0.126044	0.148501	0.558606	0.0855221	0.694638	0.64482	0.999844
ENSFDAG00000001276	MIR142	0.16888	-0.731661	0.000845029	0.311763	-0.273972	0.0868497	0.641941	0.79769	0.184835	0.00884807	0.206556	0.264281	0.178768	0.232309	0.850025	0.0887864	0.992832	0.492732	0.594079	0.837251	0.182902	0.7835	0.999844
ENSFDAG00000001277	MAGEE1	-0.23904	0.00568186	0.0353811	-0.183993	-0.271666	-0.0871071	0.0721563	0.264697	0.0613338	0.00293605	0.0685413	0.0876963	0.0593206	0.0770869	0.642206	0.981696	0.513779	0.482187	0.358949	0.72061	0.794951	0.780886	0.999844
ENSFDAG00000001282	CAMKMT	0.239809	-0.0914593	-0.0251363	0.282505	-0.118463	0.00318748	-0.0849616	0.0743028	0.0172169	0.000824176	0.0192401	0.0246171	0.0166518	0.021639	0.378991	0.485785	0.381262	0.0416826	0.450231	0.980293	0.563555	0.481858	0.999844
ENSFDAG00000001283	DAZAP1	0.443178	-0.343215	-0.0428439	-0.104251	0.251814	0.172365	0.159689	0.160163	0.0371118	0.00177655	0.0414729	0.0530632	0.0358937	0.0466437	0.268129	0.0748147	0.309399	0.608712	0.274325	0.362934	0.459666	0.807813	0.999844
ENSFDAG00000001286	PFKFB2	0.306687	0.0248817	-0.0332429	0.0052067	-0.0082382	0.0804257	-0.277808	0.208573	0.0483291	0.00231352	0.0540084	0.069102	0.0467428	0.0607421	0.501882	0.909887	0.489482	0.982125	0.974999	0.709896	0.259659	0.861287	0.999844
ENSFDAG00000001288	TTC8	-0.298625	0.242048	0.0290919	-0.0845299	-0.0512397	-0.0726945	-0.127225	0.0470559	0.0109035	0.00052195	0.0121848	0.01559	0.0105456	0.0137039	0.168625	0.0204478	0.202884	0.44381	0.681529	0.479013	0.277126	0.769216	0.999844
ENSFDAG00000001293	ENSFDAG00000001293	0.725935	-0.306355	-0.0770856	0.0148323	0.00858884	0.194222	0.141021	0.193727	0.0448891	0.00214884	0.0501641	0.0641833	0.0434157	0.0564185	0.0990837	0.14819	0.0963288	0.9472	0.972955	0.351272	0.552706	0.859253	0.999844
ENSFDAG00000001298	ENSFDAG00000001298	0.279735	0.0203961	-0.0286448	-0.0876771	-0.00278003	-0.0651682	-0.0720776	0.107471	0.0249025	0.00119208	0.0278288	0.0356061	0.0240851	0.0312985	0.393495	0.897161	0.406739	0.59918	0.988245	0.674547	0.683702	0.806406	0.999844
ENSFDAG00000001302	OARD1	0.313339	0.0397098	-0.0402447	0.0377407	-0.0841668	0.149544	-0.0599417	0.0424194	0.00982911	0.000470521	0.0109842	0.0140539	0.0095065	0.0123536	0.128169	0.688763	0.0635502	0.71877	0.47772	0.125087	0.589679	0.826038	0.999844
ENSFDAG00000001308	TARBP1	0.00282204	0.272658	-0.0206544	0.0587156	0.0979246	0.0462204	0.083184	0.0374213	0.008671	0.000415081	0.00968995	0.012398	0.00838639	0.0108981	0.988361	0.00341057	0.310686	0.550857	0.379151	0.613759	0.425551	0.795218	0.999844
ENSFDAG00000001310	IGFBP4	-1.04546	-0.317412	0.139166	-0.0972286	-0.0224936	-0.167183	0.192522	0.342341	0.0271231	0.00424101	0.0642258	0.0742667	0.0270976	0.0355736	0.0739685	0.0539397	0.0326009	0.701235	0.934218	0.309815	0.307377	0.82511	0.999844
ENSFDAG00000001311	TTC12	-0.41413	0.0166751	0.0518361	-0.037784	-0.0596503	-0.160938	0.0590566	0.0569791	0.0132028	0.000632019	0.0147543	0.0188776	0.0127694	0.0165938	0.0827556	0.884614	0.0392174	0.755753	0.66418	0.154386	0.646627	0.831319	0.999844
ENSFDAG00000001313	RGCC	-0.388861	0.0889911	0.0241375	0.895979	0.481172	0.0660476	-0.372584	0.494408	0.0611399	0.0059413	0.10302	0.125108	0.0604037	0.0793025	0.58024	0.71892	0.754167	0.00524659	0.173713	0.788133	0.185814	0.254175	0.999844
ENSFDAG00000001321	RRP7A	1.13214	-0.24154	-0.13136	0.162342	-0.031561	0.164359	0.306665	0.370508	0.0858516	0.00410972	0.0959402	0.122752	0.0830337	0.107902	0.0628917	0.409738	0.0404554	0.600195	0.928222	0.568418	0.350522	0.806406	0.999844
ENSFDAG00000001323	ENSFDAG00000001323	-0.691444	0.625957	0.0426547	0.549595	-0.292587	0.240848	-0.392707	0.626888	0.145258	0.00695351	0.162328	0.207693	0.14049	0.182566	0.382501	0.100511	0.608985	0.172536	0.520865	0.520503	0.358048	0.662715	0.999844
ENSFDAG00000001324	ENSFDAG00000001324	0.638483	-0.825051	-0.0651978	0.914788	0.773589	0.0749278	0.0325021	0.938637	0.217494	0.0104115	0.243053	0.310978	0.210356	0.273356	0.509881	0.0768742	0.522846	0.0635193	0.165375	0.870229	0.950431	0.533669	0.999844
ENSFDAG00000001327	TCF7L1	0.0621621	-0.469304	0.0312984	-0.320024	-0.289369	-0.198729	0.113235	0.12971	0.0300556	0.00143876	0.0335875	0.0429741	0.0290691	0.0377751	0.862967	0.00678901	0.409292	0.0807766	0.162751	0.243781	0.560157	0.567662	0.999844
ENSFDAG00000001328	PMPCB	0.0931011	0.0561801	-0.0107023	-0.154647	-0.0211043	-0.00194771	0.0352039	0.0265736	0.00615744	0.000294757	0.00688101	0.00880403	0.00595533	0.00773893	0.567916	0.474023	0.533042	0.0622794	0.822041	0.979864	0.689028	0.532895	0.999844
ENSFDAG00000001329	KLHL18	0.307836	-0.352308	-0.0243286	0.262724	0.0858888	0.115663	-0.0644293	0.264682	0.0613303	0.00293589	0.0685374	0.0876914	0.0593173	0.0770825	0.549604	0.154851	0.653431	0.3156	0.771785	0.634857	0.816489	0.737534	0.999844
ENSFDAG00000001331	CREB5	0.18089	-0.0247582	-0.0150864	-0.587662	0.220947	-0.054341	0.287225	0.175523	0.040671	0.00194692	0.0454504	0.0581523	0.0393361	0.0511171	0.665912	0.902293	0.732419	0.00584229	0.359547	0.784094	0.203944	0.267161	0.999844
ENSFDAG00000001337	ENSFDAG00000001337	-0.0445187	-0.838138	0.045862	-0.321022	0.136849	-0.286991	0.700075	0.409618	0.0949138	0.00454353	0.106067	0.13571	0.0917984	0.119292	0.944545	0.00651808	0.496259	0.324281	0.710279	0.343526	0.042669	0.739668	0.999844
ENSFDAG00000001340	HSPA4	0.170507	-0.151198	-0.0149824	0.0145185	0.0696905	-0.0525215	0.142896	0.0309158	0.0071636	0.000342922	0.00800541	0.0102427	0.00692846	0.00900351	0.332179	0.0740341	0.418477	0.871096	0.491075	0.52805	0.132076	0.843315	0.999844
ENSFDAG00000001341	SLC41A2	-0.793984	0.0957168	0.0884886	-0.0664172	-0.0496418	-0.0392327	0.0620772	0.118624	0.0274867	0.00131579	0.0307167	0.0393011	0.0265845	0.0345464	0.0211504	0.563714	0.0147092	0.704718	0.802273	0.809849	0.738389	0.825346	0.999844
ENSFDAG00000001342	SLC37A4	0.0852041	-0.180892	-0.00821855	0.172637	0.13114	0.00813108	0.0660096	0.0725088	0.0168012	0.000804276	0.0187756	0.0240227	0.0162498	0.0211165	0.751683	0.162847	0.771972	0.207705	0.397496	0.949141	0.649648	0.686546	0.999844
ENSFDAG00000001345	ENSFDAG00000001345	0.159139	-0.459569	-0.0117087	0.433673	0.47756	0.0796938	-0.0718885	0.141617	0.0328145	0.00157083	0.0366706	0.0469188	0.0317374	0.0412426	0.672382	0.0111812	0.767671	0.0235333	0.0274735	0.654629	0.723349	0.410989	0.903123
ENSFDAG00000001348	ENSFDAG00000001348	0.269017	-0.141426	-0.0469008	0.579905	0.318565	-0.130013	0.370902	1.16925	0.270931	0.0129695	0.302769	0.387383	0.262038	0.340518	0.803527	0.785848	0.680463	0.291927	0.608768	0.799509	0.525032	0.730121	0.999844
ENSFDAG00000001350	ENSFDAG00000001350	0.00869173	-0.115829	0.00534292	-0.110438	-0.00969818	-0.013609	0.12917	0.0316218	0.00732719	0.000350753	0.00818823	0.0104766	0.00708669	0.00920912	0.961017	0.176006	0.775426	0.222292	0.924513	0.871573	0.178294	0.701507	0.999844
ENSFDAG00000001351	TASP1	-0.000656931	0.142338	-0.00178239	-0.0173935	-0.179165	-0.0717388	-0.0355685	0.0578663	0.0134084	0.000641859	0.014984	0.0191716	0.0129683	0.0168522	0.997821	0.218984	0.943913	0.887007	0.195675	0.52872	0.784091	0.845437	0.999844
ENSFDAG00000001352	MIR223	0.782759	-0.74379	-0.0615991	0.802105	-0.543668	-0.0181437	0.0561237	0.577736	0.133869	0.00640831	0.1496	0.191408	0.129475	0.168252	0.303092	0.0420652	0.441603	0.0380987	0.213992	0.959785	0.891169	0.471371	0.999844
ENSFDAG00000001356	CLEC1A	0.752176	-0.674194	-0.0510476	0.231638	-0.224209	-0.177038	-0.00271625	0.42659	0.0988463	0.00473178	0.110462	0.141333	0.0956019	0.124234	0.249472	0.0320013	0.458027	0.485832	0.550914	0.566932	0.993851	0.782002	0.999844
ENSFDAG00000001368	NT5C3B	0.207448	-0.048801	-0.0411982	0.340916	0.244959	0.297762	0.0851783	0.363347	0.0841921	0.00403028	0.0940858	0.12038	0.0814287	0.105816	0.730733	0.866436	0.516372	0.266379	0.480176	0.29673	0.793437	0.721451	0.999844
ENSFDAG00000001374	VAT1	0.227499	-0.416867	-0.00817119	0.139768	-0.064716	-0.0105455	0.0886304	0.202144	0.0468394	0.00224221	0.0523437	0.066972	0.045302	0.0588698	0.612859	0.0540847	0.862995	0.54126	0.802532	0.960484	0.714896	0.793664	0.999844
ENSFDAG00000001377	RF00342	0.209415	0.424387	-0.0240412	-0.033636	-0.015402	-0.575639	-0.37366	0.710203	0.164563	0.00787766	0.183902	0.235296	0.159162	0.20683	0.803752	0.29549	0.786492	0.937482	0.97467	0.149054	0.411295	0.856866	0.999844
ENSFDAG00000001380	RPL6	0.0985472	0.0470871	-0.0103282	-0.11323	0.0316633	-0.0535603	-0.0144811	0.0480645	0.0111372	0.000533137	0.0124459	0.0159241	0.0107716	0.0139977	0.653069	0.655464	0.654653	0.310127	0.801879	0.605811	0.902584	0.737181	0.999844
ENSFDAG00000001381	ENSFDAG00000001381	-0.100701	0.0156223	0.0134479	-0.0949017	0.0462429	-0.100187	0.071626	0.0426298	0.00987787	0.000472855	0.0110387	0.0141236	0.00955365	0.0124149	0.625742	0.875098	0.536293	0.366384	0.697195	0.305362	0.520332	0.744426	0.999844
ENSFDAG00000001383	PDLIM3	-0.278072	0.159645	0.0235013	0.0450936	0.173938	-0.0580616	-0.0956839	0.1242	0.0287789	0.00137765	0.0321607	0.0411486	0.0278342	0.0361705	0.430092	0.346672	0.52662	0.801466	0.391186	0.727828	0.614888	0.837953	0.999844
ENSFDAG00000001385	SGCE	-0.647475	0.278685	0.0698853	-0.188375	-0.0892104	-0.135687	0.00650713	0.0965634	0.022375	0.00107109	0.0250043	0.0319922	0.0216406	0.0281218	0.0371955	0.0624508	0.0327311	0.233542	0.617947	0.356338	0.969047	0.708481	0.999844
ENSFDAG00000001390	DENND6A	0.105805	-0.209259	-0.00224396	0.00805148	0.326387	-0.049302	-0.158018	0.106054	0.024574	0.00117636	0.0274618	0.0351364	0.0237674	0.0308857	0.745261	0.181912	0.947835	0.961249	0.0816445	0.749123	0.368578	0.860841	0.999844
ENSFDAG00000001391	SHLD2	-0.0874151	-0.154017	0.0125472	0.302956	-0.0693717	0.019574	-0.0604573	0.0723323	0.0167603	0.000802318	0.0187299	0.0239643	0.0162102	0.0210651	0.74516	0.234174	0.657788	0.0268518	0.654062	0.877815	0.677007	0.427256	0.999844
ENSFDAG00000001392	FGD4	0.140153	-0.0516438	-0.02686	0.164612	0.444776	0.0619858	0.0593769	0.14355	0.0332623	0.00159227	0.0371711	0.0475591	0.0321705	0.0418055	0.711446	0.777049	0.500866	0.393212	0.0413997	0.72965	0.771508	0.754885	0.999844
ENSFDAG00000001403	GSTCD	0.497637	-0.0680557	-0.0643328	0.321801	-0.216569	0.141929	0.0875874	0.162253	0.0375961	0.00179973	0.0420142	0.0537557	0.0363621	0.0472524	0.216672	0.725597	0.129405	0.116424	0.350263	0.456698	0.687	0.613396	0.999844
ENSFDAG00000001407	RMC1	0.0262561	-0.0968218	-0.0133641	0.40574	-0.0202565	0.215258	0.0672779	0.0532314	0.0123344	0.000590449	0.0137839	0.017636	0.0119295	0.0155024	0.909395	0.38332	0.582332	0.00054843	0.878766	0.0487441	0.588958	0.113377	0.999844
ENSFDAG00000001409	CLUH	0.830434	-0.113884	-0.10649	0.294147	-0.135393	0.270399	0.253831	0.339772	0.0787296	0.00376879	0.0879814	0.112569	0.0761455	0.0989507	0.154256	0.684835	0.0828057	0.321356	0.686551	0.327134	0.419707	0.738579	0.999844
ENSFDAG00000001410	ATL1	-1.25464	-0.0619583	0.164097	-0.305401	-0.149912	-0.323466	0.0348218	0.188485	0.0436745	0.0020907	0.0488068	0.0624467	0.042241	0.0548919	0.00385388	0.766869	0.000332156	0.166853	0.548571	0.115524	0.881848	0.658549	0.999844
ENSFDAG00000001414	ENSFDAG00000001414	0.832421	-0.936511	-0.0380033	-0.703691	1.28265	-0.250917	-0.343081	1.26371	0.292819	0.0140172	0.327229	0.418678	0.283207	0.368027	0.459003	0.083511	0.748219	0.218643	0.0474464	0.637287	0.571712	0.697577	0.999844
ENSFDAG00000001420	RF00071	-0.136366	-0.00505518	0.00195914	0.217998	0.0493289	0.233122	0.178162	0.606912	0.140629	0.00673193	0.157155	0.201075	0.136013	0.176749	0.861046	0.989245	0.98095	0.582384	0.912403	0.527315	0.671728	0.804309	0.999844
ENSFDAG00000001422	BMS1	0.088042	-0.124137	-0.0041739	-0.175662	0.100093	-0.0296097	0.174298	0.0261524	0.00605985	0.000290086	0.00677196	0.0086645	0.00586095	0.00761628	0.586152	0.110788	0.806407	0.0327919	0.282237	0.698929	0.0458036	0.453298	0.999844
ENSFDAG00000001425	ENSFDAG00000001425	-0.120567	-0.471472	0.0443791	-0.216563	0.0250299	-0.0700155	0.0263406	0.213992	0.0495848	0.00237363	0.0554117	0.0708974	0.0479573	0.0623203	0.794375	0.0342348	0.362347	0.357578	0.925106	0.749182	0.915968	0.743177	0.999844
ENSFDAG00000001432	ANKRD13C	-0.232913	0.170908	0.0195745	-0.144745	0.0891122	-0.0114414	0.0443374	0.0715788	0.0165857	0.000793961	0.0185348	0.0237146	0.0160413	0.0208457	0.38399	0.184485	0.48725	0.287698	0.562814	0.92802	0.758777	0.728455	0.999844
ENSFDAG00000001433	ENSFDAG00000001433	-0.450082	0.253443	0.0307322	0.251409	0.442583	-0.104673	-0.0545008	0.210939	0.0488774	0.00233976	0.0546211	0.0698859	0.0472731	0.0614312	0.3271	0.251641	0.525205	0.282051	0.0940967	0.630215	0.825956	0.727325	0.999844
ENSFDAG00000001438	MELK	0.326694	0.0787673	-0.0490795	0.12472	0.457871	-0.0587269	0.188909	0.363832	0.0288478	0.00450708	0.0682677	0.0789471	0.0288202	0.0378351	0.588084	0.642823	0.464743	0.633121	0.103191	0.729395	0.331452	0.810134	0.999844
ENSFDAG00000001442	RF00409	0.105537	-0.195608	-0.0165924	-0.0926678	-0.101453	0.352113	0.470977	0.464119	0.107542	0.00514806	0.12018	0.153766	0.104013	0.135164	0.876889	0.550853	0.817119	0.789232	0.795849	0.274926	0.200173	0.835078	0.999844
ENSFDAG00000001444	DIO2	-0.856373	1.12782	0.035662	-0.488407	0.776835	0.341922	-0.180997	0.320761	0.0743244	0.00355792	0.0830585	0.106271	0.0718849	0.093414	0.130515	3.52e-05	0.549926	0.0901348	0.0171726	0.202207	0.55372	0.574125	0.807276
ENSFDAG00000001445	NMRAL1	0.0996457	-0.0257924	-0.0118482	0.07317	-0.128043	0.0335065	0.0425531	0.0595417	0.0137966	0.000660443	0.0154179	0.0197266	0.0133437	0.0173401	0.683006	0.826193	0.644772	0.555674	0.361953	0.771769	0.746581	0.796892	0.999844
ENSFDAG00000001447	ACD	0.73854	-0.200103	-0.0794078	-0.0160802	0.00109112	0.0120757	0.164703	0.139938	0.0324253	0.0015522	0.0362357	0.0463624	0.031361	0.0407535	0.0483508	0.266461	0.0438494	0.93268	0.995957	0.945635	0.414577	0.855871	0.999844
ENSFDAG00000001453	ENSFDAG00000001453	0.526947	0.0306012	-0.133141	2.71455	1.56861	-0.143866	-0.0923507	2.86228	0.333822	0.0345708	0.586874	0.708162	0.330364	0.433798	0.755446	0.957761	0.473945	0.000394935	0.06232	0.802355	0.88849	0.104921	0.999844
ENSFDAG00000001455	RF00026	-0.559176	0.129866	0.0593648	-0.292057	0.066061	0.377904	-0.25484	0.965464	0.223711	0.010709	0.249999	0.319866	0.216368	0.281169	0.569296	0.783647	0.566199	0.559143	0.907015	0.416545	0.630801	0.797447	0.999844
ENSFDAG00000001457	ENSFDAG00000001457	0.271246	-0.171645	-0.0189692	0.082569	-0.166391	-0.0911141	-0.040616	0.0677586	0.0157005	0.000751586	0.0175456	0.022449	0.0151852	0.0197331	0.297397	0.170732	0.488985	0.533053	0.266768	0.459669	0.772479	0.791775	0.999844
ENSFDAG00000001458	EXOC2	0.736745	-0.0768248	-0.0956856	0.334043	-0.0258735	0.235055	0.078149	0.248853	0.0576625	0.00276031	0.0644386	0.082447	0.0557698	0.0724726	0.139708	0.749022	0.0685698	0.188201	0.928201	0.319573	0.771592	0.676	0.999844
ENSFDAG00000001460	IMPACT	-0.185599	0.00285649	0.0209964	-0.0265145	-0.13431	0.0249636	0.104785	0.0365827	0.00847669	0.00040578	0.00947281	0.0121202	0.00819846	0.0106539	0.331862	0.975249	0.297264	0.785297	0.22247	0.782776	0.310017	0.834195	0.999844
ENSFDAG00000001461	RF00425	0.376964	-0.0592806	-0.0347971	-0.101856	-0.291878	0.12759	-0.102049	0.364791	0.0845268	0.00404631	0.0944598	0.120858	0.0817524	0.106237	0.53254	0.838432	0.584356	0.740337	0.401143	0.655426	0.754211	0.828527	0.999844
ENSFDAG00000001467	PGRMC2	-0.281086	0.303514	0.0110457	0.141685	0.268849	-0.0980267	0.0679164	0.0889037	0.0206001	0.00098613	0.0230209	0.0294545	0.019924	0.0258911	0.345829	0.0344576	0.725032	0.350396	0.11723	0.487385	0.672963	0.742925	0.999844
ENSFDAG00000001472	TIMM8A	0.196332	0.0674634	-0.0238812	-0.168298	0.0314839	-0.00820617	0.0481359	0.0531064	0.0123054	0.000589063	0.0137515	0.0175946	0.0119015	0.015466	0.394238	0.54308	0.325138	0.151239	0.812381	0.940039	0.698711	0.645594	0.999844
ENSFDAG00000001473	PHTF2	-0.175971	0.207541	0.00716967	-0.0838827	0.252351	-0.0504125	0.0497536	0.0794009	0.0183982	0.000880724	0.0205603	0.0263062	0.0177943	0.0231237	0.532303	0.125996	0.809098	0.558546	0.119736	0.705492	0.743526	0.797351	0.999844
ENSFDAG00000001474	GTF2H1	0.105007	0.0913097	-0.0154561	0.0306137	0.0263632	-0.100878	-0.0202683	0.0265863	0.00616038	0.000294898	0.00688431	0.00880824	0.00595818	0.00774263	0.519571	0.244684	0.368095	0.712153	0.778786	0.191252	0.817826	0.826038	0.999844
ENSFDAG00000001475	CYB5R1	-0.416284	-0.248273	0.0737008	-0.50945	-0.054633	-0.161049	0.137999	0.101797	0.0171758	0.00118258	0.0233903	0.0293169	0.0167995	0.0219987	0.191984	0.0581724	0.0320997	0.000865128	0.749668	0.214037	0.352155	0.13297	0.999844
ENSFDAG00000001480	ENSFDAG00000001480	2.93953	-1.44055	-0.301647	-0.387392	-0.646948	0.757147	1.14674	1.51695	0.169253	0.0183877	0.307408	0.369136	0.167707	0.220232	0.0170016	0.000462569	0.0261137	0.484737	0.286957	0.0644779	0.0145427	0.781791	0.999844
ENSFDAG00000001481	FAM57A	0.0761245	-0.229038	-0.000613073	-0.00182088	0.0444951	0.0314113	0.0943504	0.0238605	0.00552879	0.000264664	0.00617849	0.00790518	0.00534732	0.00694882	0.622143	0.00206794	0.969939	0.981518	0.616762	0.66752	0.257698	0.861287	0.999844
ENSFDAG00000001484	MRPL35	-0.0727862	0.120643	0.00440258	-0.0538631	0.0509026	-0.010476	-0.0635844	0.0404353	0.00936937	0.000448513	0.0104704	0.0133965	0.00906184	0.0117758	0.717377	0.212629	0.83532	0.598616	0.660091	0.91237	0.557914	0.806406	0.999844
ENSFDAG00000001486	LCP2	1.60107	-0.975402	-0.137249	0.242913	-0.741082	-0.201643	0.30731	0.425858	0.0661144	0.00499836	0.0951311	0.118298	0.0648494	0.0850085	0.014149	0.000148562	0.0522204	0.430949	0.0311889	0.428463	0.291877	0.766288	0.922231
ENSFDAG00000001493	RIN2	-0.0639121	0.102513	0.00268546	0.112524	0.179084	-0.177661	-0.0841626	0.0781819	0.0181158	0.000867203	0.0202446	0.0259023	0.0175211	0.0227686	0.819199	0.446274	0.92734	0.429035	0.265826	0.179536	0.577005	0.766288	0.999844
ENSFDAG00000001497	NT5C	0.378803	-0.119957	-0.0416913	0.16466	0.132168	-0.00786192	-0.0343474	0.12471	0.0288968	0.00138329	0.0322926	0.0413173	0.0279484	0.0363188	0.283422	0.480393	0.262307	0.359512	0.51555	0.962491	0.856972	0.743177	0.999844
ENSFDAG00000001500	MUL1	0.546193	-0.178045	-0.0639463	0.0995139	-0.0262151	0.267414	0.0494092	0.242283	0.05614	0.00268743	0.0627372	0.0802702	0.0542974	0.0705592	0.267151	0.45239	0.217381	0.691145	0.926278	0.25113	0.852439	0.823347	0.999844
ENSFDAG00000001510	FAM241B	-0.213185	0.0816147	0.0270975	-0.109013	0.0267944	-0.0953039	-0.0780271	0.0722308	0.0167368	0.000801193	0.0187036	0.0239307	0.0161875	0.0210355	0.427649	0.528133	0.338403	0.425392	0.862488	0.453816	0.590589	0.765711	0.999844
ENSFDAG00000001514	ABHD17B	0.131439	0.0855261	-0.0191896	0.0791708	-0.046642	0.0457678	-0.118541	0.137118	0.031772	0.00152093	0.0355056	0.0454283	0.0307292	0.0399324	0.722622	0.631357	0.622681	0.674367	0.82678	0.794026	0.553043	0.82095	0.999844
ENSFDAG00000001516	RF00026	0.0631513	-0.170745	-0.0016065	-0.405947	0.810174	-0.105077	0.0935443	0.541124	0.125385	0.00600221	0.14012	0.179279	0.12127	0.15759	0.931587	0.629666	0.983456	0.278154	0.055692	0.762852	0.81371	0.727315	0.999844
ENSFDAG00000001527	ENSFDAG00000001527	0.0274064	0.139523	-0.0135971	0.047151	0.0881289	0.107185	-0.0877445	0.0273547	0.00633844	0.000303422	0.00708329	0.00906284	0.0061304	0.00796642	0.868389	0.0796908	0.435044	0.575317	0.354584	0.171013	0.325569	0.803968	0.999844
ENSFDAG00000001530	FLRT2	-0.000518819	-0.972285	0.0626193	-0.475706	0.0246221	-0.285154	0.251107	0.150208	0.0348051	0.00166612	0.0388952	0.0497651	0.0336627	0.0437446	0.998932	1.87e-07	0.125004	0.015862	0.912114	0.120138	0.229908	0.371608	0.999844
ENSFDAG00000001536	ENSFDAG00000001536	-0.023247	-0.0398103	0.0117103	0.0875571	-0.359993	-0.0458957	-0.104731	0.0629302	0.0145817	0.000698029	0.0162953	0.0208493	0.0141031	0.018327	0.926166	0.741643	0.657597	0.492777	0.0126616	0.699149	0.439152	0.7835	0.728371
ENSFDAG00000001538	RF00334	0.724402	-0.497455	-0.0523301	-0.0738278	1.11524	0.160813	-1.258	0.675708	0.15657	0.00749504	0.174969	0.223868	0.151431	0.196784	0.378182	0.208687	0.545541	0.859903	0.0184202	0.679423	0.00457006	0.841482	0.825373
ENSFDAG00000001541	DHDH	0.153647	0.0110984	-0.0219377	0.241379	0.0976022	-0.0480443	-0.0597669	0.154488	0.0357969	0.0017136	0.0400034	0.0511831	0.0346219	0.044991	0.695864	0.953223	0.596146	0.227493	0.666166	0.796248	0.778118	0.704708	0.999844
ENSFDAG00000001543	ARID5B	0.045186	-0.210296	0.0119989	-0.0693568	-0.134013	-0.0867969	-0.0281356	0.0385764	0.00893867	0.000427895	0.00998907	0.0127807	0.00864527	0.0112345	0.818045	0.0261278	0.561874	0.487715	0.235856	0.350561	0.790664	0.782523	0.999844
ENSFDAG00000001544	NMB	0.359567	0.121701	-0.0487985	-0.101627	0.524859	-0.0780163	-0.11478	0.212064	0.049138	0.00235224	0.0549123	0.0702585	0.0475251	0.0617586	0.434912	0.582994	0.31434	0.664519	0.0476892	0.720442	0.644175	0.817368	0.999844
ENSFDAG00000001547	REV1	0.236277	-0.00179352	-0.0314514	0.0104841	0.00108512	0.046683	0.106169	0.027374	0.00634292	0.000303636	0.0070883	0.00906924	0.00613473	0.00797205	0.15327	0.982033	0.0710836	0.900899	0.990909	0.551161	0.234405	0.850011	0.999844
ENSFDAG00000001548	RIOK3	0.0985365	-0.0604913	-0.00732591	0.0513563	-0.0908883	-0.0489852	0.0141845	0.0152607	0.0035361	0.000169273	0.00395163	0.00505598	0.00342003	0.00444432	0.425076	0.309031	0.573383	0.413947	0.201172	0.402241	0.831506	0.760718	0.999844
ENSFDAG00000001549	RF00334	1.48314	-0.120464	-0.142191	-0.453922	0.089122	0.317947	-1.12885	0.588715	0.136413	0.00653009	0.152443	0.195046	0.131935	0.171449	0.0532381	0.744303	0.0784762	0.244995	0.840075	0.381392	0.00640544	0.713943	0.999844
ENSFDAG00000001551	ZNF570	-0.176778	0.215035	0.0124922	0.0691242	-0.116999	-0.0582548	-0.0835472	0.0634975	0.0147132	0.000704322	0.0164422	0.0210372	0.0142303	0.0184922	0.482969	0.0762647	0.637848	0.589834	0.419864	0.625307	0.538964	0.804885	0.999844
ENSFDAG00000001557	FAM98A	-0.75526	0.048298	0.0935981	-0.230082	-0.0854206	-0.171191	0.0519888	0.0781497	0.0142426	0.000898542	0.0184546	0.023286	0.0138931	0.0181696	0.00689919	0.685696	0.00179343	0.0903271	0.575631	0.146396	0.699727	0.574321	0.999844
ENSFDAG00000001558	ENSFDAG00000001558	0.423558	-0.108161	-0.0447933	0.208426	0.24672	0.0372345	-0.353531	0.111056	0.0257332	0.00123185	0.0287572	0.0367939	0.0248886	0.0323426	0.203733	0.500148	0.201869	0.219043	0.198365	0.813419	0.049321	0.698155	0.999844
ENSFDAG00000001560	RF01151	0.0232819	0.11216	-0.021286	0.0606468	-0.255858	0.499578	0.13534	0.155406	0.0360095	0.00172378	0.0402411	0.0514872	0.0348276	0.0452583	0.952905	0.554481	0.60817	0.762405	0.259494	0.00742935	0.524661	0.831509	0.999844
ENSFDAG00000001562	GEMIN2	0.0744166	-0.0378103	-0.0101578	-0.0212753	0.0280574	0.0889221	0.0622094	0.0359186	0.0083228	0.000398413	0.00930084	0.0119001	0.00804962	0.0104604	0.694575	0.678542	0.610822	0.8254	0.797024	0.321632	0.543023	0.838154	0.999844
ENSFDAG00000001563	GIN1	-0.254259	-0.147849	0.0355823	-0.107468	0.174439	-0.047591	0.155573	0.192341	0.044568	0.00213347	0.0498053	0.0637242	0.0431051	0.0560149	0.562084	0.483717	0.44109	0.630127	0.489552	0.818695	0.510969	0.809444	0.999844
ENSFDAG00000001564	SNAPC2	0.764998	-0.506177	-0.0721619	0.120612	0.121395	0.071951	0.155407	0.392749	0.0910051	0.00435642	0.101699	0.130121	0.0880181	0.114379	0.222207	0.0933642	0.274258	0.705277	0.736469	0.808376	0.645866	0.825346	0.999844
ENSFDAG00000001570	SYVN1	0.526691	-0.284403	-0.0554313	0.376365	-0.0805137	0.111165	0.00538522	0.199739	0.046282	0.00221552	0.0517208	0.066175	0.0447629	0.0581692	0.238603	0.186172	0.238935	0.097941	0.754292	0.599291	0.982186	0.587351	0.999844
ENSFDAG00000001571	SPPL2B	1.87518	-0.218072	-0.227713	0.372748	0.283612	0.385385	0.0898797	1.31773	0.305334	0.0146164	0.341215	0.436574	0.295312	0.383757	0.102354	0.693101	0.0596317	0.523396	0.667752	0.478215	0.884641	0.789933	0.999844
ENSFDAG00000001572	R3HCC1	0.596149	-0.194542	-0.0671757	0.185338	0.0214501	0.0159839	0.123896	0.167149	0.0387306	0.00185404	0.0432819	0.0553778	0.0374593	0.0486782	0.144799	0.322898	0.118735	0.373003	0.927373	0.934181	0.57442	0.747591	0.999844
ENSFDAG00000001573	MKLN1	-0.182027	0.11953	0.0181737	-0.0558307	0.0275754	-0.101229	0.0106292	0.0646592	0.0149824	0.000717208	0.016743	0.0214221	0.0144906	0.0188305	0.474086	0.3288	0.497385	0.666122	0.85056	0.400384	0.938259	0.818136	0.999844
ENSFDAG00000001576	TRMT10C	-0.0229782	0.302085	-0.0140886	0.0945703	-0.137676	0.0933004	-0.0682228	0.0525764	0.0121826	0.000583183	0.0136142	0.017419	0.0117828	0.0153116	0.920176	0.0062022	0.559626	0.417648	0.296879	0.39005	0.581401	0.762045	0.999844
ENSFDAG00000001577	ZNF667	0.255577	-0.0438303	-0.0270437	0.0346645	-0.0526833	-0.00784169	-0.0272611	0.0356065	0.00825049	0.000394951	0.00922002	0.0117967	0.00797968	0.0103696	0.175599	0.629421	0.173577	0.718092	0.627636	0.930048	0.788923	0.826038	0.999844
ENSFDAG00000001578	TOB2	0.223953	-0.248475	-0.0355247	0.474578	0.0145134	0.170769	0.358312	0.547399	0.126839	0.00607181	0.141745	0.181358	0.122676	0.159417	0.762122	0.485378	0.64846	0.207477	0.972813	0.62586	0.369497	0.686546	0.999844
ENSFDAG00000001583	MYL9	-0.131469	-0.270729	0.0403299	-0.170909	-0.234655	-0.22084	0.0984981	0.0909292	0.0210695	0.0010086	0.0235454	0.0301256	0.0203779	0.026481	0.662849	0.0621637	0.204121	0.265359	0.17639	0.121857	0.544989	0.720827	0.999844
ENSFDAG00000001584	ENSFDAG00000001584	0.255619	0.0885275	-0.0301815	-0.118632	0.0310269	0.015768	-0.125399	0.104831	0.0242908	0.0011628	0.0271452	0.0347314	0.0234935	0.0305297	0.429824	0.570027	0.376107	0.471503	0.867775	0.918063	0.472951	0.776237	0.999844
ENSFDAG00000001587	EIF2S1	0.0304854	0.102221	-0.00751606	-0.110281	0.0370582	0.0177592	0.00431898	0.0459886	0.0106562	0.000510111	0.0119084	0.0152364	0.0103064	0.0133931	0.886957	0.322058	0.7393	0.312213	0.764007	0.861133	0.97023	0.737181	0.999844
ENSFDAG00000001592	NEDD9	-0.140766	0.124448	0.00300678	0.143895	0.313909	0.0501066	-0.119139	0.0969195	0.0224575	0.00107504	0.0250965	0.0321102	0.0217204	0.0282255	0.651153	0.406293	0.926933	0.363711	0.0798101	0.733867	0.478236	0.744426	0.999844
ENSFDAG00000001599	RPS26	0.153678	0.00331815	-0.00876591	-0.239221	0.0109344	-0.147164	-0.0252986	0.0858183	0.0198852	0.000951907	0.022222	0.0284323	0.0192325	0.0249926	0.599866	0.981227	0.776319	0.108548	0.948296	0.288614	0.872861	0.603631	0.999844
ENSFDAG00000001600	RF02266	0.528714	0.204101	-0.063845	-0.605972	-0.10445	0.210838	0.0237388	0.265643	0.0615529	0.00294654	0.0687862	0.0880097	0.0595326	0.0773623	0.304976	0.410701	0.239527	0.0208616	0.724777	0.387525	0.931985	0.395012	0.999844
ENSFDAG00000001603	RF00026	-0.654725	0.0647998	0.0571382	-0.341639	0.197633	0.499649	0.394837	0.564107	0.130711	0.00625714	0.146071	0.186893	0.126421	0.164283	0.38336	0.857755	0.470088	0.37138	0.64756	0.159945	0.329986	0.747047	0.999844
ENSFDAG00000001605	ENSFDAG00000001605	-0.290736	-0.00507768	0.0363038	0.133492	-0.0885474	-0.0983084	-0.0639597	0.0873979	0.0202512	0.000969428	0.022631	0.0289556	0.0195865	0.0254526	0.325391	0.971537	0.24362	0.37488	0.602808	0.482402	0.688491	0.747792	0.999844
ENSFDAG00000001608	POLR3K	0.150009	-0.0123107	-0.0180737	0.0336514	0.0399777	0.010385	0.0107938	0.0644782	0.0149404	0.0007152	0.0166961	0.0213621	0.01445	0.0187778	0.55468	0.919775	0.499154	0.79453	0.78445	0.931155	0.937217	0.836838	0.999844
ENSFDAG00000001609	TBC1D13	0.994608	-0.0555453	-0.119327	0.370215	-0.100017	0.261268	-0.214973	0.369963	0.0857253	0.00410368	0.0957991	0.122572	0.0829116	0.107743	0.102006	0.849535	0.0624989	0.231651	0.775123	0.364217	0.512518	0.707878	0.999844
ENSFDAG00000001610	CDH13	-0.782849	-0.197002	0.113878	-0.391277	0.127902	-0.14885	0.0208758	0.132757	0.0125546	0.00162819	0.0258443	0.0304706	0.0124933	0.0164062	0.031669	0.0787127	0.0047698	0.0149373	0.463731	0.182954	0.870533	0.365609	0.999844
ENSFDAG00000001613	PIN4	0.0345513	0.127244	-0.00994298	0.143457	0.0452148	-0.0243677	-0.144331	0.0524385	0.0121507	0.000581654	0.0135785	0.0173733	0.0117519	0.0152715	0.880068	0.248357	0.68014	0.218282	0.731571	0.822149	0.242833	0.697288	0.999844
ENSFDAG00000001619	SHTN1	-0.377926	-0.343492	0.0164132	2.0789	1.25606	-0.0818779	0.0419857	1.26038	0.0657955	0.015873	0.221557	0.245495	0.066191	0.0867856	0.736394	0.180533	0.896348	1e-05	0.0112424	0.750296	0.886669	0.0521789	0.714195
ENSFDAG00000001624	ICAM2	0.564002	-0.285314	-0.073566	0.454624	0.251775	0.204716	0.169283	0.341721	0.0791812	0.00379041	0.088486	0.113215	0.0765822	0.0995182	0.334636	0.310611	0.232123	0.126433	0.454294	0.459448	0.591533	0.626849	0.999844
ENSFDAG00000001625	SSRP1	1.01229	-0.258917	-0.114216	-0.0221941	0.145849	0.272057	0.120109	0.223644	0.0518213	0.00248069	0.0579109	0.0740951	0.0501203	0.0651311	0.0323093	0.255378	0.0218366	0.926518	0.592091	0.224284	0.637904	0.855734	0.999844
ENSFDAG00000001633	ENSFDAG00000001633	0.693441	-1.9421	-0.0324609	1.40019	0.173579	-0.0688399	1.13801	1.26167	0.292346	0.0139946	0.326701	0.418003	0.282751	0.367433	0.537	0.000328284	0.783779	0.0142981	0.788332	0.896993	0.0604635	0.359107	0.999844
ENSFDAG00000001638	PRMT9	-0.0183356	0.0701399	0.000473068	0.1544	-0.0473512	-0.193281	-0.035242	0.0800203	0.0185417	0.000887595	0.0207206	0.0265114	0.0179332	0.023304	0.948319	0.606485	0.987331	0.283443	0.771194	0.148931	0.817425	0.727737	0.999844
ENSFDAG00000001639	TXNDC12	-0.180827	0.10894	0.0256448	-0.255641	-0.158624	-0.0635288	-0.0261864	0.0390791	0.00905513	0.00043347	0.0101192	0.0129472	0.00875791	0.0113809	0.360335	0.252281	0.218045	0.0110438	0.163301	0.497236	0.806097	0.326911	0.999844
ENSFDAG00000001640	DPCD	0.21923	0.0736801	-0.0184641	-0.223217	-0.0419458	-0.0544677	-0.156163	0.0730042	0.016916	0.000809771	0.0189039	0.0241869	0.0163608	0.0212608	0.417146	0.571053	0.516433	0.104482	0.787383	0.670231	0.28417	0.597167	0.999844
ENSFDAG00000001645	TSTA3	0.346437	-0.0628339	-0.0430873	0.17599	-0.0383924	0.15052	-0.0325215	0.0736499	0.0170656	0.000816934	0.0190711	0.0244008	0.0165055	0.0214488	0.201761	0.630526	0.131684	0.202528	0.805854	0.241358	0.824268	0.68117	0.999844
ENSFDAG00000001647	MIR181B1	0.654277	0.209377	-0.0724599	-0.294554	0.0227371	-0.126453	-0.22406	0.561238	0.130046	0.00622532	0.145328	0.185943	0.125778	0.163447	0.382472	0.561508	0.358426	0.439722	0.957948	0.721424	0.579435	0.768006	0.999844
ENSFDAG00000001651	MEPCE	0.507058	-0.0999664	-0.06025	0.220993	0.024944	0.1845	-0.129049	0.15001	0.0347593	0.00166393	0.038844	0.0496996	0.0336184	0.043687	0.190475	0.591827	0.139668	0.262165	0.910911	0.314292	0.53696	0.71959	0.999844
ENSFDAG00000001653	GRAMD2B	-0.647452	-0.0107753	0.0895876	-0.364593	0.264602	-0.340557	-0.0600949	0.310013	0.0718341	0.0034387	0.0802755	0.10271	0.0694763	0.0902841	0.244897	0.967931	0.126576	0.198158	0.409013	0.196348	0.84148	0.679566	0.999844
ENSFDAG00000001654	ENSFDAG00000001654	1.18662	-1.40673	-0.0830128	0.925585	0.906595	-0.381706	-0.274829	1.4357	0.332671	0.015925	0.371764	0.47566	0.321752	0.418115	0.322013	0.0147296	0.510655	0.129005	0.188673	0.500994	0.670819	0.62706	0.999844
ENSFDAG00000001655	CEBPG	0.240775	-0.0914766	-0.0366057	0.415301	0.0941152	0.151391	-0.0215078	0.110513	0.0256072	0.00122582	0.0286164	0.0366137	0.0247667	0.0321842	0.468894	0.56756	0.295779	0.0140875	0.622821	0.33606	0.904572	0.358622	0.999844
ENSFDAG00000001656	KAT14	1.04748	-0.0552025	-0.128951	0.231405	0.0496525	0.260537	-0.0274847	0.30675	0.071078	0.00340251	0.0794305	0.101629	0.068745	0.0893338	0.0585884	0.835965	0.027058	0.411608	0.876229	0.320377	0.926732	0.760695	0.999844
ENSFDAG00000001663	PIP5K1C	0.190571	-0.106216	-0.0195287	0.099406	-0.0413393	-0.00167671	0.0483835	0.145164	0.0336364	0.00161018	0.0375892	0.0480941	0.0325324	0.0422757	0.616949	0.562494	0.626491	0.608146	0.850483	0.992583	0.813963	0.807412	0.999844
ENSFDAG00000001664	KMT5A	0.0827206	-0.199551	0.00399756	-0.435538	0.000564168	-0.0126535	0.284806	0.0710123	0.0164545	0.000787677	0.0183881	0.023527	0.0159144	0.0206807	0.756243	0.119791	0.886735	0.00131873	0.997065	0.920104	0.0476519	0.156667	0.999844
ENSFDAG00000001667	ENSFDAG00000001667	-0.170168	0.141339	0.0245006	-0.498689	-0.0567	0.0661117	-0.102459	0.0910161	0.0210896	0.00100956	0.0235679	0.0301544	0.0203974	0.0265063	0.572719	0.330425	0.440648	0.00116055	0.744032	0.643433	0.529138	0.149406	0.999844
ENSFDAG00000001669	GPKOW	0.278337	-0.000376493	-0.0336611	0.0171366	-0.0637376	0.0807999	0.00832879	0.0439199	0.0101768	0.000487165	0.0113727	0.014551	0.00984278	0.0127907	0.184135	0.997022	0.127241	0.872337	0.597233	0.4154	0.941294	0.843491	0.999844
ENSFDAG00000001677	RF01984	0.227955	-0.23514	-0.0107672	0.285812	0.680187	-0.151179	-0.806822	0.453068	0.104982	0.00502548	0.117318	0.150105	0.101536	0.131945	0.734864	0.468009	0.879278	0.40403	0.0791532	0.635185	0.0263399	0.758713	0.999844
ENSFDAG00000001683	STRIP2	3.8828	-1.21465	-0.367228	-0.779646	-1.18709	-0.323598	-0.238544	1.19541	0.0956733	0.0148015	0.224707	0.260122	0.0955634	0.125458	0.000383342	8.6e-05	0.00254081	0.10003	0.0199372	0.295196	0.500647	0.588364	0.836491
ENSFDAG00000001689	ENSFDAG00000001689	0.152285	0.0423817	-0.013014	-0.456178	-0.0615823	0.0601446	0.109062	0.0315855	0.0070029	0.000352749	0.00803561	0.010267	0.00678362	0.00882838	0.391518	0.612538	0.488364	3.6e-07	0.543345	0.465243	0.24575	0.0521789	0.999844
ENSFDAG00000001690	CTSS	-0.187109	-0.109205	-0.0242521	2.33494	1.77417	0.0543765	-0.0856515	1.4338	0.0627088	0.0181456	0.247221	0.269556	0.0632151	0.0828359	0.875828	0.662771	0.857123	2.65e-06	0.00063267	0.828776	0.766012	0.0521789	0.391333
ENSFDAG00000001700	NDUFAF4	-0.0517385	0.0653987	0.0034173	-0.169533	0.0711551	0.0715543	0.0105011	0.0824363	0.0191016	0.000914393	0.0213462	0.0273118	0.0184746	0.0240077	0.856996	0.636078	0.910023	0.245902	0.666791	0.598583	0.945966	0.713943	0.999844
ENSFDAG00000001706	SLC36A4	-0.0598959	-0.100746	0.0177638	-0.266572	0.0571017	-0.071076	0.0588067	0.0843592	0.0195471	0.000935723	0.0218442	0.0279489	0.0189055	0.0245677	0.836619	0.471162	0.561433	0.0712897	0.732682	0.605208	0.707523	0.554315	0.999844
ENSFDAG00000001710	ENSFDAG00000001710	0.0293436	-0.0548487	-0.004752	0.373189	-0.0634809	-0.0834756	-0.0477465	0.0304544	0.00705669	0.000337804	0.00788594	0.0100898	0.00682507	0.00886914	0.866468	0.513802	0.795983	2.64e-05	0.527402	0.31229	0.612161	0.0575704	0.999844
ENSFDAG00000001714	ENSFDAG00000001714	-0.579998	-0.0523727	0.0609987	0.692788	0.347024	0.0202093	-0.00949583	0.134406	0.00794187	0.00168584	0.0240156	0.0269329	0.00797575	0.0104616	0.113641	0.556745	0.137375	7.8e-06	0.0344687	0.820976	0.926031	0.0521789	0.953085
ENSFDAG00000001716	ATP5F1B	0.0459408	-0.0255564	-0.00387661	-0.0284394	-0.0100837	0.000918975	0.030194	0.00612867	0.00142009	6.8e-05	0.00158697	0.00203048	0.00137348	0.00178483	0.557315	0.497661	0.638228	0.47529	0.822929	0.980217	0.474796	0.777212	0.999844
ENSFDAG00000001717	ABHD1	-0.199259	0.0447385	0.0162078	-0.0359118	0.0677025	0.109042	0.0967229	0.0650691	0.0150773	0.000721754	0.0168491	0.0215579	0.0145825	0.0189498	0.434718	0.715597	0.546314	0.78204	0.644722	0.366538	0.482287	0.833458	0.999844
ENSFDAG00000001718	RF00599	-0.716934	0.513387	0.0538763	0.413893	-0.416052	0.397109	-0.484712	0.647402	0.150011	0.00718106	0.16764	0.21449	0.145088	0.188541	0.372913	0.185002	0.524923	0.312074	0.369001	0.297159	0.264294	0.737181	0.999844
ENSFDAG00000001719	RF00068	-0.583709	-0.442217	0.0793565	0.00556799	0.322279	0.206043	0.147814	0.575571	0.133367	0.0063843	0.14904	0.190691	0.12899	0.167622	0.441661	0.225931	0.320625	0.988493	0.460504	0.566176	0.718072	0.861287	0.999844
ENSFDAG00000001721	LNP1	-0.878119	0.18154	0.117661	-0.300095	-0.383841	-0.141862	-0.393523	0.395611	0.0916681	0.00438816	0.10244	0.131069	0.0886593	0.115212	0.162682	0.548772	0.0756994	0.348444	0.289038	0.633764	0.246307	0.742925	0.999844
ENSFDAG00000001728	PDCL	0.0722617	0.0360417	-0.011096	0.0745248	-0.0382711	0.0206191	-0.0342265	0.0210837	0.00488536	0.000233862	0.00545945	0.00698518	0.00472501	0.00614012	0.618722	0.606097	0.468096	0.313158	0.647016	0.764205	0.662263	0.737181	0.999844
ENSFDAG00000001729	MOCS2	-0.0880726	0.120943	0.0094624	-0.0991332	-0.110862	0.0159156	-0.0993121	0.0407924	0.00945214	0.000452475	0.0105629	0.0135149	0.00914189	0.0118798	0.66279	0.213506	0.656435	0.334767	0.340272	0.867797	0.362209	0.742456	0.999844
ENSFDAG00000001730	ENSFDAG00000001730	-0.0659221	0.267699	-0.00416084	0.0552703	-0.0566593	0.0389037	-0.17385	0.0489812	0.0113496	0.000543305	0.0126833	0.0162279	0.0109771	0.0142646	0.765808	0.0119779	0.858324	0.623591	0.656482	0.710399	0.145501	0.809444	0.999844
ENSFDAG00000001731	SLC6A15	-0.214986	-0.157827	0.0371031	-0.0459203	0.391528	-0.0948599	-0.350635	0.187776	0.0435102	0.00208284	0.0486232	0.0622118	0.0420821	0.0546855	0.619808	0.44927	0.416227	0.835035	0.116477	0.643782	0.133768	0.838364	0.999844
ENSFDAG00000001732	RF01882	0.150571	-0.0691714	0.0174478	-0.435408	0.133792	-0.419979	-0.645851	0.416361	0.0964763	0.00461833	0.107813	0.137944	0.0933097	0.121255	0.81549	0.82377	0.797377	0.184823	0.718676	0.169169	0.0636343	0.673664	0.999844
ENSFDAG00000001734	RF00211	0.805747	-0.171632	-0.0690957	-0.435585	-0.0397302	-0.267872	0.0729844	0.64366	0.149144	0.00713955	0.166671	0.21325	0.144249	0.187451	0.315226	0.656737	0.413506	0.285995	0.931438	0.480626	0.866133	0.728455	0.999844
ENSFDAG00000001738	ZDHHC17	0.0882609	-0.0170895	-0.00795827	0.0273651	0.063139	-0.0923879	-0.0539458	0.0732673	0.016977	0.00081269	0.018972	0.024274	0.0164198	0.0213374	0.74437	0.895649	0.780121	0.842518	0.685291	0.470913	0.7119	0.839052	0.999844
ENSFDAG00000001743	RF00015	1.01121	-0.0364726	-0.0723196	-0.59501	0.222889	-0.515982	-1.03415	0.463684	0.107441	0.00514323	0.120067	0.153622	0.103915	0.135037	0.13754	0.911402	0.313257	0.085949	0.569578	0.109455	0.00488952	0.571698	0.999844
ENSFDAG00000001744	ENSFDAG00000001744	-0.272883	0.235803	0.0175395	0.220532	-0.205087	0.0382633	-0.0839216	0.22176	0.0513847	0.00245979	0.057423	0.0734709	0.0496981	0.0645824	0.562269	0.29823	0.723604	0.357416	0.449275	0.863722	0.741226	0.743177	0.999844
ENSFDAG00000001745	RF00562	0.496933	0.278229	-0.0799879	0.386869	0.0774088	-0.0643971	-0.0588717	0.55054	0.127567	0.00610665	0.142558	0.182398	0.12338	0.160332	0.503026	0.435984	0.306033	0.305536	0.856171	0.854536	0.883111	0.737181	0.999844
ENSFDAG00000001749	HOXC9	-1.96261	2.14272	0.134441	-0.647682	-0.197194	-0.00649226	-0.0399907	0.625494	0.0837319	0.0074605	0.133367	0.163345	0.0825247	0.108306	0.0130812	1.31e-13	0.119591	0.0761412	0.625613	0.98197	0.903283	0.56298	0.999844
ENSFDAG00000001752	GNB4	-0.112163	-0.112078	0.0211875	-0.132221	0.133643	-0.171347	0.135771	0.116621	0.0270226	0.00129357	0.0301981	0.0386374	0.0261356	0.0339631	0.742576	0.495365	0.555798	0.446734	0.496571	0.289196	0.461293	0.770029	0.999844
ENSFDAG00000001753	RF00211	-0.549608	0.195937	0.0443206	0.00198268	0.467973	0.586275	-0.591491	0.778777	0.180453	0.00863829	0.201658	0.258015	0.17453	0.226801	0.533418	0.64462	0.633461	0.996477	0.356897	0.160512	0.214232	0.862766	0.999844
ENSFDAG00000001759	GSTZ1	0.172103	-0.29525	-0.00281465	0.0203895	-0.0765977	-0.0117384	-0.0313505	0.0853986	0.019788	0.000947252	0.0221133	0.0282932	0.0191385	0.0248704	0.55591	0.0358267	0.927134	0.890941	0.648836	0.93238	0.842424	0.846142	0.999844
ENSFDAG00000001765	MLLT11	-1.01011	0.376303	0.110947	-0.160662	-0.219601	0.0201861	-0.0608635	0.159451	0.0135373	0.00196812	0.0303278	0.0353342	0.0135047	0.0177316	0.0114189	0.0012197	0.0123889	0.356239	0.242706	0.862098	0.64762	0.743177	0.999844
ENSFDAG00000001767	ERAL1	0.239876	-0.0626861	-0.0256456	0.0475236	0.0107632	-0.0610139	0.0521604	0.0297553	0.00689468	0.000330049	0.0077049	0.00985816	0.00666838	0.00866553	0.164344	0.450284	0.158056	0.588225	0.913675	0.454962	0.575255	0.804309	0.999844
ENSFDAG00000001773	TCN1	-1.3034	-0.847272	0.133448	2.63427	2.19805	0.108337	0.854698	2.80333	0.184771	0.0350179	0.509203	0.577432	0.185235	0.243052	0.436293	0.0487141	0.475767	0.00022284	0.00382084	0.801259	0.0829789	0.0870754	0.51839
ENSFDAG00000001774	ENSFDAG00000001774	0.121409	-0.0221399	0.000800139	-0.307935	-0.0093106	-0.249219	-0.0101746	0.142061	0.0329174	0.00157576	0.0367856	0.0470659	0.0318369	0.0413719	0.747365	0.902876	0.983918	0.108376	0.965768	0.162492	0.960105	0.603325	0.999844
ENSFDAG00000001775	XPR1	-0.251396	-0.140386	0.0337744	0.125978	0.0865792	-0.155314	0.0782654	0.064498	0.014945	0.000715419	0.0167013	0.0213687	0.0144545	0.0187835	0.322231	0.250823	0.206689	0.329655	0.553665	0.196412	0.56796	0.740212	0.999844
ENSFDAG00000001777	ENSFDAG00000001777	0.0541101	0.112061	-0.017164	0.114584	0.0039925	0.0381103	0.0544599	0.0226502	0.00524835	0.000251239	0.0058651	0.0075042	0.00507608	0.00659635	0.719194	0.121905	0.278869	0.134605	0.96324	0.592714	0.502513	0.63147	0.999844
ENSFDAG00000001780	ATP2B1	0.00234671	0.111598	0.00145483	-0.137257	0.0225248	-0.157003	-0.0466678	0.0652998	0.0151308	0.000724313	0.0169089	0.0216344	0.0146342	0.019017	0.992673	0.364278	0.95689	0.291176	0.878288	0.19434	0.735053	0.730121	0.999844
ENSFDAG00000001784	RALBP1	0.20982	-0.071003	-0.0103787	-0.173288	-0.00684759	-0.261185	0.00700636	0.0804705	0.0186461	0.000892589	0.0208372	0.0266605	0.018034	0.0234352	0.459511	0.603081	0.728299	0.229961	0.966548	0.0517848	0.963495	0.707211	0.999844
ENSFDAG00000001786	RF00026	0.0622117	0.537209	-0.0535657	0.510045	-0.162153	0.365969	0.020438	0.625071	0.144837	0.00693336	0.161857	0.207091	0.140083	0.182037	0.937281	0.158075	0.520028	0.204878	0.721598	0.328171	0.961794	0.684883	0.999844
ENSFDAG00000001787	GSTM4	0.195455	0.0927876	-0.0258221	0.102992	0.00102616	-0.00571903	-0.158729	0.0525628	0.0121795	0.000583033	0.0136107	0.0174145	0.0117797	0.0153077	0.393921	0.400478	0.284885	0.377345	0.993796	0.957976	0.199518	0.748966	0.999844
ENSFDAG00000001792	PIGX	-0.262804	0.0343707	0.0159728	0.725886	0.27512	-0.0135368	-0.336354	0.366819	0.0849967	0.0040688	0.0949849	0.12153	0.0822069	0.106827	0.664349	0.906153	0.802272	0.0185091	0.430003	0.962343	0.303435	0.382952	0.999844
ENSFDAG00000001794	SEC23A	-0.315531	0.0516244	0.0436354	-0.265857	0.0887076	-0.352054	0.184726	0.259563	0.060144	0.0028791	0.0672117	0.0859952	0.0581699	0.0755915	0.5357	0.833275	0.416089	0.305138	0.762272	0.144375	0.501659	0.737181	0.999844
ENSFDAG00000001795	ENSFDAG00000001795	0.379859	0.0645766	-0.0459846	-0.246101	0.0753972	0.050598	0.0949409	0.0776769	0.0179987	0.000861601	0.0201138	0.025735	0.017408	0.0226216	0.172901	0.630273	0.117207	0.0826939	0.638358	0.701353	0.527886	0.568306	0.999844
ENSFDAG00000001797	CENPH	0.113937	0.173734	-0.0264967	0.00235774	0.0896338	0.101783	0.0146471	0.074638	0.0172946	0.000827894	0.0193269	0.0247282	0.0167269	0.0217366	0.676645	0.186475	0.357111	0.986469	0.568677	0.431289	0.920862	0.861287	0.999844
ENSFDAG00000001806	ENOX2	-0.334449	0.106493	0.0347668	0.133346	-0.00249677	-0.172026	0.00512258	0.0707593	0.0163958	0.000784871	0.0183226	0.0234431	0.0158577	0.020607	0.208646	0.405591	0.214612	0.324569	0.98699	0.171915	0.971534	0.739683	0.999844
ENSFDAG00000001808	HIST3H2A	-0.996185	-0.286005	0.127048	-0.379661	0.0473891	0.248007	0.23696	0.203116	0.0283647	0.00241224	0.0438668	0.0539667	0.0279186	0.0366311	0.0270785	0.0894734	0.00968809	0.0698769	0.838359	0.137734	0.215685	0.551469	0.999844
ENSFDAG00000001809	PDE3A	1.06509	-0.362937	-0.107066	0.0389707	-0.34725	0.230561	0.00693001	0.279726	0.0648161	0.00310275	0.0724328	0.0926754	0.0626886	0.0814636	0.0440287	0.153991	0.0545923	0.884868	0.254007	0.357127	0.980629	0.844995	0.999844
ENSFDAG00000001810	SRA1	-0.0884455	0.171337	0.0026526	0.0619527	-0.0135962	-0.0193879	-0.0906204	0.0367523	0.008516	0.000407661	0.00951674	0.0121763	0.00823648	0.0107033	0.644545	0.0633581	0.895477	0.525388	0.901938	0.830836	0.38107	0.790478	0.999844
ENSFDAG00000001811	ENSFDAG00000001811	0.27078	-0.0798023	-0.0319507	0.142878	-0.0322287	0.170976	-0.0827711	0.0563747	0.0130628	0.000625315	0.0145978	0.0186774	0.012634	0.0164178	0.2541	0.485034	0.201354	0.236984	0.81357	0.128229	0.51829	0.710962	0.999844
ENSFDAG00000001825	TMED4	-0.189673	0.0273156	0.0234408	-0.0677562	0.0295333	-0.0485512	-0.0202581	0.0235335	0.00545303	0.000261037	0.00609382	0.00779685	0.00527404	0.00685359	0.216306	0.711452	0.146822	0.385412	0.738028	0.503788	0.806687	0.751364	0.999844
ENSFDAG00000001826	RF00439	0.957503	-0.0442855	-0.106412	0.234864	0.0364067	-0.574639	0.272047	0.619198	0.143476	0.00686822	0.160337	0.205145	0.138767	0.180327	0.223674	0.906927	0.199138	0.557511	0.935935	0.122929	0.521758	0.796892	0.999844
ENSFDAG00000001828	AMACR	-0.782404	-0.183668	0.0995244	-0.0560731	0.0609101	0.081561	-0.00358144	0.0978077	0.00765309	0.00121243	0.0183058	0.0211392	0.00764784	0.0100397	0.012358	0.035773	0.00425974	0.678553	0.675265	0.351006	0.971487	0.821287	0.999844
ENSFDAG00000001830	COL8A2	-0.993448	-0.390668	0.145763	-0.247203	-0.108415	-0.287464	0.168637	0.242505	0.0561916	0.00268989	0.0627948	0.0803439	0.0543472	0.0706239	0.0436572	0.0993409	0.00494679	0.323894	0.702102	0.217541	0.525712	0.739668	0.999844
ENSFDAG00000001832	HSF4	0.348978	-0.00816097	-0.0529594	0.0311696	0.168559	0.399135	-0.0399958	0.357006	0.082723	0.00395996	0.092444	0.118279	0.0800078	0.10397	0.559177	0.977363	0.40002	0.918347	0.624053	0.158218	0.901284	0.85469	0.999844
ENSFDAG00000001842	CHST15	-0.114276	0.0437558	0.0158739	-0.132962	-0.356679	0.100924	0.0807118	0.370065	0.0857488	0.0041048	0.0958254	0.122605	0.0829343	0.107773	0.850992	0.881219	0.804317	0.667542	0.308372	0.726	0.805793	0.818187	0.999844
ENSFDAG00000001843	RDH14	0.166043	-0.098777	-0.014468	0.266779	0.184526	-0.0446277	-0.290956	0.0929004	0.0215262	0.00103046	0.0240558	0.0307786	0.0208197	0.0270551	0.585914	0.500793	0.652201	0.0854227	0.292891	0.7571	0.0769103	0.571698	0.999844
ENSFDAG00000001847	RF00015	-0.81133	-0.0811141	0.0865159	0.554694	0.76776	-0.154684	-0.344388	0.699694	0.162128	0.00776109	0.18118	0.231814	0.156807	0.20377	0.332078	0.840347	0.326074	0.19252	0.110799	0.696073	0.445511	0.677863	0.999844
ENSFDAG00000001851	CYREN	0.272405	0.0222654	-0.0288756	-0.0640648	-0.0264644	0.00922553	-0.100866	0.0630746	0.0146152	0.000699631	0.0163327	0.0208971	0.0141355	0.018369	0.278079	0.853877	0.274973	0.616165	0.854743	0.93815	0.456741	0.808274	0.999844
ENSFDAG00000001856	IL10RA	-0.397988	-0.471826	9.33e-05	1.54624	0.655018	0.604221	0.579017	1.27024	0.29433	0.0140896	0.328918	0.42084	0.284669	0.369927	0.723995	0.38447	0.999373	0.00701603	0.312636	0.257438	0.341101	0.287415	0.999844
ENSFDAG00000001859	SAYSD1	0.203206	-0.251832	-0.0113911	-0.204694	0.453828	0.176981	-0.262073	0.186919	0.0433115	0.00207332	0.0484011	0.0619277	0.0418899	0.0544357	0.638346	0.226253	0.802457	0.352157	0.0682005	0.387196	0.261327	0.742934	0.999844
ENSFDAG00000001860	BLCAP	-0.610202	-0.293358	0.0971831	-0.0677275	-0.201939	-0.298296	0.00499241	0.0809896	0.0187663	0.000898346	0.0209716	0.0268325	0.0181504	0.0235863	0.0320193	0.0322375	0.0011852	0.640013	0.217653	0.0268192	0.974068	0.813443	0.999844
ENSFDAG00000001861	RNF130	-0.293685	0.263814	0.00601386	0.548471	0.126767	0.143843	-0.156531	0.0928946	0.0215249	0.0010304	0.0240543	0.0307767	0.0208184	0.0270534	0.335258	0.072152	0.851387	0.000405676	0.469929	0.318798	0.341261	0.104921	0.999844
ENSFDAG00000001871	C12orf10	0.121904	-0.013411	-0.011026	-0.14978	0.0354069	0.0223412	0.0125883	0.0421311	0.00976233	0.000467324	0.0109095	0.0139584	0.00944191	0.0122697	0.552576	0.892033	0.61002	0.15157	0.764415	0.818154	0.909519	0.646081	0.999844
ENSFDAG00000001874	RF00100	-0.606668	0.140083	0.0333857	0.470322	0.323007	0.588516	0.00103719	0.507948	0.117698	0.00563421	0.131529	0.168287	0.113835	0.147928	0.394647	0.683039	0.65648	0.194688	0.431058	0.0811071	0.997848	0.678755	0.999844
ENSFDAG00000001875	RF00001	-0.280504	-0.0567222	0.0456072	-0.234338	-0.339998	-0.19772	0.283341	0.656012	0.152007	0.00727656	0.169869	0.217342	0.147017	0.191048	0.729099	0.884327	0.592892	0.569647	0.46582	0.60609	0.516828	0.802123	0.999844
ENSFDAG00000001876	SETD5	0.285086	-0.180894	-0.0269173	-0.00715557	-0.11037	0.0800707	0.107648	0.104329	0.0241744	0.00115723	0.0270152	0.0345651	0.0233809	0.0303834	0.377443	0.244649	0.428789	0.965275	0.552744	0.600521	0.536858	0.860841	0.999844
ENSFDAG00000001877	PSMA6	0.0514883	0.133512	-0.00935835	-0.0644966	-0.0224047	-0.0050285	-0.0866874	0.03378	0.00782726	0.000374692	0.00874707	0.0111916	0.00757035	0.00983764	0.779368	0.131275	0.628768	0.490437	0.832275	0.953913	0.382119	0.783364	0.999844
ENSFDAG00000001885	GOLPH3	-0.364066	0.196523	0.0244092	0.0657094	0.174933	0.141026	0.0088385	0.0870143	0.0201623	0.000965173	0.0225317	0.0288285	0.0195006	0.0253409	0.217129	0.166352	0.432049	0.661564	0.302873	0.312545	0.955722	0.816736	0.999844
ENSFDAG00000001887	TMEM9	-0.355609	0.0432425	0.0385121	-0.0276629	-0.0412169	0.0298138	0.0197088	0.122277	0.0283332	0.00135631	0.0316627	0.0405114	0.0274032	0.0356103	0.309176	0.797257	0.295688	0.876457	0.837744	0.857073	0.916819	0.843868	0.999844
ENSFDAG00000001888	SC5D	-0.212666	0.651809	-0.0108685	0.181308	0.0906848	0.0293154	-0.212073	0.0649093	0.0150403	0.000719981	0.0168078	0.021505	0.0145467	0.0189033	0.403871	1.07e-07	0.685441	0.161963	0.536316	0.807958	0.12296	0.652097	0.999844
ENSFDAG00000001890	ZNF397	0.0082883	0.277217	-0.0212582	0.132526	-0.180151	0.201521	0.0152739	0.0707943	0.016404	0.000785258	0.0183316	0.0234547	0.0158655	0.0206172	0.975149	0.0304308	0.448083	0.327672	0.239472	0.10962	0.915285	0.74009	0.999844
ENSFDAG00000001892	RF00152	0.393807	0.136805	-0.0479822	0.27637	-0.139584	-0.0277358	-0.376164	0.296106	0.0686115	0.00328444	0.0766743	0.0981022	0.0663595	0.0862339	0.469248	0.601476	0.402458	0.31824	0.655849	0.914259	0.200205	0.738574	0.999844
ENSFDAG00000001897	RBM5	0.150266	0.0377967	-0.0190583	0.0271787	-0.0328076	-0.0138862	-0.0139561	0.0101735	0.00235733	0.000112846	0.00263435	0.00337056	0.00227996	0.00296279	0.136279	0.43629	0.0728001	0.596437	0.572007	0.771191	0.797644	0.806406	0.999844
ENSFDAG00000001898	ENSFDAG00000001898	0.100693	-0.00257163	-0.0103061	-0.0919872	-0.0990737	-0.133948	0.230954	0.0753409	0.0174575	0.00083569	0.0195089	0.024961	0.0168845	0.0219413	0.713733	0.984471	0.721459	0.510163	0.530603	0.302614	0.118955	0.788268	0.999844
ENSFDAG00000001901	POGLUT1	-0.14961	0.0769039	0.00954832	0.0767923	0.123019	0.0260235	-0.0230609	0.0292353	0.0067742	0.000324282	0.00757026	0.00968589	0.00655185	0.0085141	0.381575	0.350112	0.595951	0.377454	0.211306	0.74783	0.802646	0.748966	0.999844
ENSFDAG00000001902	THOC6	0.5015	-0.00022407	-0.0601915	0.0688783	-0.348687	-0.0743527	0.326242	0.602719	0.139658	0.00668543	0.156069	0.199686	0.135074	0.175528	0.518298	0.999522	0.461635	0.86159	0.435214	0.839677	0.43616	0.842029	0.999844
ENSFDAG00000001904	NDUFA4L2	-4.39985	2.33586	0.455305	-0.86515	0.080794	-0.429269	-0.197504	2.19092	0.115817	0.0275815	0.385729	0.427915	0.116494	0.152746	0.00295371	6.71e-12	0.00611533	0.163621	0.901704	0.2085	0.613314	0.654168	0.999844
ENSFDAG00000001905	ARMH3	0.25385	0.0245406	-0.0373634	0.0959188	-0.0900911	0.16317	0.0637245	0.0760102	0.0176126	0.000843115	0.0196823	0.0251828	0.0170345	0.0221362	0.357181	0.853295	0.198173	0.494164	0.570229	0.21123	0.668428	0.784098	0.999844
ENSFDAG00000001911	KIF22	0.845685	-0.193672	-0.102208	-0.0634566	0.274649	0.119368	0.363609	0.197203	0.0456944	0.00218739	0.0510641	0.0653348	0.0441946	0.0574307	0.0568615	0.364929	0.0288629	0.778853	0.2826	0.570163	0.129198	0.833353	0.999844
ENSFDAG00000001912	COMMD3	0.138501	0.0881376	-0.0173559	-0.00196453	-0.0309031	0.0327976	-0.182886	0.0463893	0.010749	0.000514556	0.0120122	0.0153692	0.0103962	0.0135098	0.520191	0.395262	0.444198	0.985699	0.803149	0.747706	0.115612	0.861287	0.999844
ENSFDAG00000001913	COL5A2	-0.422556	-0.18208	0.0606291	-0.051818	-0.025904	-0.0821324	0.0919271	0.208351	0.0482777	0.00231106	0.0539509	0.0690284	0.0466931	0.0606774	0.354584	0.407283	0.207245	0.823465	0.92146	0.703877	0.709007	0.838154	0.999844
ENSFDAG00000001914	ADAMTSL3	-1.10749	-0.192436	0.157672	-0.700554	0.0859435	-0.30036	0.105745	0.391131	0.09063	0.00433847	0.10128	0.129585	0.0876553	0.113908	0.0765878	0.522681	0.016675	0.0277147	0.811302	0.310344	0.75404	0.43294	0.999844
ENSFDAG00000001915	ENSFDAG00000001915	0.0158048	0.186547	-0.00718325	-0.0994408	0.00325804	0.021714	-0.128615	0.0498309	0.0115465	0.00055273	0.0129033	0.0165094	0.0111675	0.0145121	0.943556	0.0825531	0.759957	0.381348	0.979771	0.837199	0.285681	0.74978	0.999844
ENSFDAG00000001924	PTAFR	1.37005	-1.2449	-0.140101	0.803917	0.305405	0.340384	0.494342	1.14173	0.264554	0.0126642	0.295642	0.378265	0.25587	0.332503	0.199773	0.0155058	0.21315	0.139268	0.619495	0.501002	0.391283	0.635799	0.999844
ENSFDAG00000001929	RF01892	-0.593238	0.488721	0.0421295	0.131522	-0.266747	0.129185	-0.0512164	0.115888	0.0268527	0.00128544	0.0300082	0.0383945	0.0259713	0.0337496	0.0813945	0.00285989	0.23997	0.44771	0.173409	0.422777	0.780407	0.770029	0.999844
ENSFDAG00000001933	ITFG1	-0.441841	-0.0592471	0.0606521	0.0318991	0.000191027	-0.199152	-0.0910036	0.0629228	0.01458	0.000697947	0.0162934	0.0208468	0.0141015	0.0183248	0.0781682	0.623661	0.0216872	0.802662	0.998944	0.0935276	0.501416	0.837953	0.999844
ENSFDAG00000001936	MRPL4	0.395502	-0.221105	-0.0461622	0.0783205	0.00999784	0.134047	0.303515	0.316039	0.0732303	0.00350554	0.0818358	0.104706	0.0708266	0.0920389	0.481729	0.413894	0.435587	0.784253	0.975351	0.614482	0.317094	0.833895	0.999844
ENSFDAG00000001946	ENSFDAG00000001946	-0.562363	-0.0801436	0.0802466	0.0343684	-0.277771	-0.237388	-0.0531071	0.110313	0.0255611	0.00122361	0.0285648	0.0365477	0.0247221	0.0321262	0.0904218	0.616175	0.021787	0.838862	0.146232	0.131098	0.767006	0.838382	0.999844
ENSFDAG00000001947	FILIP1L	-0.734399	0.369253	0.0791108	-0.304084	0.0552231	-0.191919	-0.206794	0.106355	0.011502	0.00129229	0.0213809	0.0255859	0.0114067	0.0149797	0.0243273	0.000575297	0.027759	0.0375617	0.729914	0.0723419	0.0911025	0.471148	0.999844
ENSFDAG00000001948	CKAP2	0.0311507	-0.132058	0.00327279	-0.234927	0.251302	-0.159171	0.263019	0.181647	0.0420899	0.00201485	0.047036	0.060181	0.0407084	0.0529003	0.941735	0.519777	0.941876	0.278709	0.305651	0.430169	0.252807	0.727325	0.999844
ENSFDAG00000001949	SNTA1	-0.145771	-0.00379836	0.0237451	-0.323816	-0.0119881	0.0421427	0.0120038	0.177364	0.0410976	0.00196735	0.0459271	0.0587622	0.0397487	0.0516532	0.729246	0.985051	0.592411	0.13079	0.960558	0.832592	0.957878	0.628259	0.999844
ENSFDAG00000001950	GATAD2A	0.647054	-0.373994	-0.0673803	0.0858073	-0.0076302	0.258552	0.171927	0.166573	0.0385971	0.00184764	0.0431327	0.0551869	0.0373302	0.0485104	0.112876	0.0569552	0.116984	0.679488	0.974089	0.180835	0.43504	0.821377	0.999844
ENSFDAG00000001954	DNAAF5	0.182842	-0.151621	-0.0106599	-0.033076	-0.0372592	-0.209732	0.145459	0.113077	0.0262014	0.00125426	0.0292804	0.0374633	0.0253414	0.0329311	0.586622	0.348917	0.763418	0.846727	0.847351	0.187673	0.422804	0.839052	0.999844
ENSFDAG00000001958	CHMP6	0.379025	-0.290075	-0.0300615	-0.124318	0.0504597	0.00316355	0.145226	0.0698628	0.0161881	0.000774927	0.0180904	0.0231461	0.0156568	0.0203459	0.151576	0.0226147	0.280191	0.355333	0.740139	0.979829	0.308613	0.743177	0.999844
ENSFDAG00000001962	TP53BP1	0.33225	-0.139214	-0.0387506	0.16092	-0.0518962	0.0966493	0.117882	0.138958	0.0321983	0.00154134	0.035982	0.0460378	0.0311414	0.0404682	0.372768	0.437851	0.323629	0.396251	0.808882	0.583909	0.557883	0.755736	0.999844
ENSFDAG00000001963	VAPA	-0.221194	-0.00107247	0.0323477	-0.0932127	-0.0461023	-0.145182	-0.00370616	0.0627649	0.0145434	0.000696195	0.0162525	0.0207945	0.0140661	0.0182788	0.377286	0.992904	0.220213	0.464678	0.749193	0.220905	0.978131	0.773947	0.999844
ENSFDAG00000001964	RF01883	0.302645	0.208579	-0.0353143	-0.212748	0.00454954	-0.0646035	-0.228579	0.181945	0.042159	0.00201816	0.0471133	0.0602799	0.0407753	0.0529873	0.478003	0.309706	0.431813	0.32701	0.985216	0.74902	0.320709	0.74009	0.999844
ENSFDAG00000001970	ENSFDAG00000001970	0.803536	-0.21781	-0.0708452	-0.0373022	-0.426278	-0.0826227	-0.110307	0.170817	0.0395805	0.00189472	0.0442317	0.056593	0.0382813	0.0497464	0.0518717	0.273602	0.103618	0.859222	0.0731503	0.672817	0.620908	0.841482	0.999844
ENSFDAG00000001972	ENSFDAG00000001972	0.460163	0.0980766	-0.0605831	-0.319556	0.168094	0.37035	-0.0726905	0.219269	0.0508074	0.00243216	0.0567779	0.0726455	0.0491398	0.0638569	0.325753	0.663481	0.21928	0.179892	0.53285	0.0947833	0.77361	0.67043	0.999844
ENSFDAG00000001973	KIAA1143	0.343994	0.0342597	-0.0459554	0.086687	-0.0754209	0.191117	-0.0724356	0.0504974	0.0117009	0.000560123	0.0130759	0.0167302	0.0113168	0.0147062	0.125821	0.751457	0.0521667	0.4484	0.559827	0.0724082	0.550299	0.770029	0.999844
ENSFDAG00000001975	PRRG2	0.421182	-0.0207319	-0.0435639	-0.0946231	0.257851	-0.0771862	-0.200916	0.228203	0.0528775	0.00253125	0.0590913	0.0756054	0.0511419	0.0664587	0.377952	0.928162	0.386555	0.697087	0.348368	0.732869	0.435767	0.825038	0.999844
ENSFDAG00000001982	EMP2	0.084494	-0.32327	0.00623242	-0.174053	0.125192	-0.0595294	0.191295	0.144955	0.033588	0.00160786	0.037535	0.0480248	0.0324855	0.0422148	0.824371	0.0777486	0.876483	0.368979	0.567815	0.741186	0.351829	0.745349	0.999844
ENSFDAG00000001989	ENSFDAG00000001989	-0.518332	1.12478	0.0191782	-0.104374	-0.126271	-0.685255	0.165979	1.1355	0.263111	0.0125951	0.29403	0.376201	0.254475	0.330689	0.626667	0.0283224	0.864313	0.847362	0.836892	0.174335	0.772864	0.839094	0.999844
ENSFDAG00000001991	SMYD5	0.372791	-0.363258	-0.0334407	-0.0441213	0.0288889	0.104333	0.305619	0.135382	0.0313698	0.00150167	0.0350561	0.0448532	0.0303401	0.0394268	0.310977	0.04027	0.388163	0.813705	0.8915	0.549186	0.123765	0.838154	0.999844
ENSFDAG00000001994	TBC1D25	0.823474	-0.199498	-0.0916322	0.327185	-0.396877	0.186069	-0.015206	0.690928	0.160097	0.00766386	0.178911	0.22891	0.154842	0.201217	0.321842	0.618065	0.295236	0.43921	0.406814	0.636316	0.972958	0.768006	0.999844
ENSFDAG00000001995	BRD8	-0.0639467	-0.0137197	0.00458206	0.170238	0.0334842	-0.00429694	-0.039453	0.0319606	0.0074057	0.000354511	0.00827596	0.0105888	0.00716262	0.00930779	0.720573	0.873332	0.807728	0.0613012	0.744879	0.959507	0.682585	0.529975	0.999844
ENSFDAG00000001998	ASB5	-0.912625	0.553322	0.107496	-0.856952	0.200861	0.0197826	-0.229996	0.949781	0.0671716	0.0118292	0.174545	0.199396	0.0672565	0.0882675	0.349046	0.0327661	0.322978	0.0402499	0.652841	0.939196	0.438848	0.477517	0.999844
ENSFDAG00000001999	CNOT6	0.0569543	0.0679088	-0.00157296	-0.0850933	-0.126411	-0.224672	0.0277581	0.0832956	0.0193007	0.000923925	0.0215687	0.0275965	0.0186672	0.0242579	0.843561	0.624976	0.958729	0.562315	0.446684	0.100092	0.858548	0.798376	0.999844
ENSFDAG00000002000	OLFML3	0.0764002	-0.207824	-0.000645298	-0.328255	0.322665	0.0369223	0.200199	0.0551909	0.0127885	0.000612184	0.0142913	0.0182852	0.0123687	0.0160731	0.745024	0.0660993	0.979193	0.00603548	0.0170249	0.739896	0.11431	0.270849	0.807276
ENSFDAG00000002009	ENSFDAG00000002009	0.365765	0.017171	-0.0477712	0.00150598	0.16605	-0.0869345	0.171283	0.0876443	0.0203083	0.000972161	0.0226948	0.0290373	0.0196417	0.0255243	0.216646	0.904093	0.125489	0.992024	0.329832	0.53506	0.283673	0.861287	0.999844
ENSFDAG00000002010	ENSFDAG00000002010	0.105119	0.167785	-0.0218511	-0.0107533	0.0515707	0.0294783	-0.0223159	0.0555243	0.0128657	0.000615882	0.0143776	0.0183956	0.0124434	0.0161702	0.655521	0.139079	0.378594	0.928541	0.703775	0.791579	0.860693	0.855734	0.999844
ENSFDAG00000002013	MPG	0.202637	-0.0638328	-0.0126628	-0.156543	-0.0060701	-0.0292402	-0.14147	0.110263	0.0255494	0.00122305	0.0285518	0.0365311	0.0247108	0.0321116	0.541701	0.689636	0.717291	0.354219	0.974664	0.852437	0.429838	0.743177	0.999844
ENSFDAG00000002014	ENSFDAG00000002014	-0.127184	0.109998	0.0148948	-0.12515	-0.0204036	-0.0713323	-0.0445823	0.041538	0.00962489	0.000460744	0.0107559	0.0137619	0.00930897	0.012097	0.532605	0.262199	0.487738	0.227541	0.861923	0.45971	0.685224	0.704708	0.999844
ENSFDAG00000002016	RNLS	0.254362	0.115935	-0.032293	-0.0853456	-0.043816	0.0629537	-0.100126	0.0318923	0.00738987	0.000353754	0.00825828	0.0105662	0.00714731	0.0092879	0.154352	0.177453	0.0859878	0.347652	0.669919	0.456486	0.298836	0.742925	0.999844
ENSFDAG00000002021	ENSFDAG00000002021	0.163769	0.268089	-0.0524507	0.344133	0.435913	0.192433	0.00380401	0.314763	0.0729347	0.00349139	0.0815055	0.104284	0.0705408	0.0916674	0.77036	0.320864	0.374717	0.228047	0.177058	0.468737	0.989976	0.705448	0.999844
ENSFDAG00000002030	RAB27A	1.67402	-0.800924	-0.148379	0.118658	-0.570492	-0.0303713	0.0577296	0.473048	0.109611	0.00524711	0.122492	0.156725	0.106014	0.137764	0.0149357	0.0155567	0.0405215	0.734584	0.149569	0.925682	0.876399	0.827197	0.999844
ENSFDAG00000002032	PIEZO1	0.688945	-0.520432	-0.0689315	0.280177	0.0651679	0.173425	0.282925	0.294674	0.0682799	0.00326856	0.0763036	0.097628	0.0660387	0.085817	0.204387	0.0464074	0.227933	0.310447	0.834786	0.499766	0.334147	0.737181	0.999844
ENSFDAG00000002034	RFX5	1.01596	0.136372	-0.139736	0.388235	-0.0563221	0.364251	-0.127135	0.285333	0.0661154	0.00316495	0.0738848	0.0945332	0.0639453	0.0830966	0.0571769	0.595859	0.0129972	0.153207	0.854654	0.149742	0.659188	0.64787	0.999844
ENSFDAG00000002035	RNASEH1	0.316991	0.0147055	-0.0347051	-0.000417765	0.170604	-0.109395	0.0682907	0.123618	0.0152891	0.0014855	0.0257595	0.0312829	0.0151049	0.0198309	0.367279	0.905331	0.367884	0.997923	0.334758	0.373413	0.627717	0.862948	0.999844
ENSFDAG00000002038	ENSFDAG00000002038	0.945963	-1.77921	-0.0756564	1.0172	1.39268	0.189675	0.592591	1.59378	0.369299	0.0176784	0.412697	0.528032	0.357178	0.464151	0.453672	0.00341394	0.569345	0.113331	0.0552949	0.750961	0.384403	0.608458	0.999844
ENSFDAG00000002048	AOC3	-0.401833	-0.858199	0.0988169	-0.0889046	-0.278212	-0.197646	0.205475	0.340944	0.0790011	0.00378179	0.0882847	0.112957	0.076408	0.0992919	0.491337	0.0022633	0.108081	0.764777	0.407791	0.474597	0.514349	0.831647	0.999844
ENSFDAG00000002049	HIST2H2BE	0.0185215	-0.0515977	0.00423189	-0.186145	-0.0624263	0.00562045	0.0692469	0.161333	0.0373828	0.00178952	0.0417758	0.0534508	0.0361558	0.0469843	0.963221	0.789572	0.920314	0.362438	0.787147	0.976419	0.749374	0.743457	0.999844
ENSFDAG00000002053	ATP8B2	0.157264	-0.252884	-0.0115926	-0.0443246	0.0135039	0.201619	0.0772761	0.324121	0.0751031	0.00359519	0.0839287	0.107384	0.072638	0.0943927	0.782369	0.356128	0.846694	0.878399	0.967129	0.454411	0.801411	0.843949	0.999844
ENSFDAG00000002055	ST3GAL2	0.259328	-0.0487394	-0.0310873	0.164539	-0.0088617	-0.0314118	0.00050682	0.146022	0.0338352	0.0016197	0.0378113	0.0483783	0.0327247	0.0425256	0.497365	0.791033	0.439853	0.397458	0.967862	0.862147	0.998039	0.755736	0.999844
ENSFDAG00000002056	LRIG2	0.21909	0.059697	-0.037391	0.325991	-0.0671508	0.173482	-0.0961126	0.113163	0.0262214	0.00125522	0.0293027	0.0374919	0.0253607	0.0329561	0.514863	0.712382	0.291253	0.056862	0.728739	0.275992	0.596504	0.519647	0.999844
ENSFDAG00000002064	ENSFDAG00000002064	-0.400244	-0.174833	0.0630493	-0.103828	0.0929492	-0.259785	-0.00963033	0.0779814	0.0180693	0.000864979	0.0201927	0.0258359	0.0174762	0.0227103	0.151779	0.193385	0.0320516	0.464983	0.563079	0.0493997	0.949046	0.774111	0.999844
ENSFDAG00000002073	GLIPR2	-0.170678	-0.187952	0.044939	-0.22856	-0.355366	-0.153991	-0.0467255	0.102145	0.0236684	0.00113301	0.0264497	0.0338415	0.0228915	0.0297474	0.593319	0.221824	0.181851	0.159913	0.0533907	0.308778	0.786458	0.650596	0.999844
ENSFDAG00000002074	SUGCT	-0.221101	0.221363	0.0246678	0.0767489	-0.361979	-0.0782287	-0.224489	0.0559366	0.0129612	0.000620455	0.0144843	0.0185322	0.0125358	0.0162902	0.349864	0.0518494	0.322017	0.523663	0.0078372	0.48474	0.0786012	0.789935	0.618764
ENSFDAG00000002076	PELO	-0.209386	0.0875278	0.0186581	-0.138595	0.169536	0.065017	0.0251758	0.0451429	0.0104602	0.00050073	0.0116894	0.0149562	0.0101169	0.0131468	0.324383	0.392104	0.404391	0.19988	0.165662	0.518018	0.826206	0.68117	0.999844
ENSFDAG00000002080	FGFR1	-0.700645	0.642416	0.033176	-0.376718	0.633896	0.245447	0.28299	0.190804	0.0442117	0.00211642	0.0494071	0.0632147	0.0427605	0.0555671	0.108714	0.00224866	0.47082	0.0901108	0.0116952	0.235244	0.229946	0.574125	0.72467
ENSFDAG00000002082	ENSFDAG00000002082	-0.10693	0.186981	0.00304306	0.0551472	-0.00715621	0.0517011	-0.114433	0.0306453	0.00710092	0.000339922	0.00793537	0.010153	0.00686785	0.00892474	0.541316	0.0264931	0.868903	0.53587	0.943381	0.532717	0.225779	0.792065	0.999844
ENSFDAG00000002087	CNTRL	0.116654	-0.127288	-0.0185224	0.350507	0.102378	-0.0880787	0.195356	0.0626473	0.0145162	0.000694891	0.016222	0.0207555	0.0140397	0.0182446	0.641167	0.290749	0.482274	0.00592374	0.477317	0.457272	0.148091	0.267941	0.999844
ENSFDAG00000002088	TECPR1	0.798995	-0.480093	-0.083882	0.286446	0.071982	0.236943	0.197424	0.397902	0.092199	0.00441357	0.103034	0.131828	0.0891727	0.11588	0.205281	0.113853	0.206725	0.372186	0.842847	0.427506	0.561942	0.747107	0.999844
ENSFDAG00000002089	ACAP2	0.10574	-0.165809	-0.00131297	-0.103484	0.0472197	-0.152101	0.114091	0.0492666	0.0114157	0.000546471	0.0127572	0.0163224	0.011041	0.0143478	0.633795	0.120693	0.95521	0.359555	0.711681	0.147748	0.340848	0.743177	0.999844
ENSFDAG00000002097	ENSFDAG00000002097	0.0208361	0.0847937	-0.00799432	0.00493427	0.147361	-0.0691199	0.0234354	0.0344888	0.0079915	0.000382554	0.0089306	0.0114264	0.00772919	0.0100441	0.910668	0.342861	0.682739	0.958359	0.168027	0.431747	0.81511	0.860841	0.999844
ENSFDAG00000002099	TAMM41	0.302582	-0.140031	-0.0253099	-0.071932	-0.0694219	0.000544899	0.014682	0.0310998	0.00720623	0.000344963	0.00805305	0.0103036	0.0069697	0.00905709	0.0862002	0.0990307	0.172974	0.422801	0.494029	0.994792	0.877394	0.764979	0.999844
ENSFDAG00000002112	ENG	0.154796	1.09444	-0.0843672	0.205767	-0.303229	0.29642	-0.0303856	0.588859	0.136446	0.0065317	0.152481	0.195094	0.131968	0.171491	0.840133	0.00304809	0.296529	0.598228	0.492389	0.414518	0.941508	0.806406	0.999844
ENSFDAG00000002113	ENSFDAG00000002113	0.146687	-0.0240086	-0.012282	-0.0306964	-0.0596699	0.0271579	-0.105434	0.0191231	0.00443108	0.000212116	0.00495179	0.00633565	0.00428564	0.00556917	0.288804	0.718344	0.399061	0.662677	0.453464	0.678254	0.157709	0.816761	0.999844
ENSFDAG00000002118	SLC25A13	-0.0874776	-0.121639	0.0155667	-0.125461	0.0959795	-0.00903891	0.111626	0.0426206	0.00987574	0.000472752	0.0110363	0.0141205	0.00955159	0.0124122	0.671764	0.220945	0.474024	0.232379	0.41926	0.926312	0.316376	0.708481	0.999844
ENSFDAG00000002119	ENPP4	0.44268	-0.256343	-0.0486027	0.187477	0.0109195	0.205627	0.0422206	0.081819	0.0189585	0.000907547	0.0211864	0.0271073	0.0183363	0.0238279	0.121715	0.0626395	0.106671	0.197743	0.947121	0.12888	0.784457	0.679566	0.999844
ENSFDAG00000002123	LAMTOR4	0.217138	0.13953	-0.0324998	0.1448	0.0739913	0.00386056	-0.213798	0.122815	0.0284578	0.00136228	0.0318019	0.0406895	0.0275237	0.0357669	0.535523	0.40817	0.378568	0.416807	0.713762	0.981435	0.258274	0.761235	0.999844
ENSFDAG00000002126	NUP58	-0.00140264	0.0277089	0.00411194	-0.0618691	-0.01386	-0.179424	0.0314247	0.0528759	0.012252	0.000586506	0.0136918	0.0175182	0.0118499	0.0153989	0.995133	0.802331	0.865176	0.596985	0.9166	0.0993009	0.800085	0.806406	0.999844
ENSFDAG00000002127	GOLPH3L	0.013792	-0.0178599	-0.0110224	0.252122	0.165119	0.0903847	0.023049	0.0439037	0.0101731	0.000486985	0.0113685	0.0145457	0.00983915	0.0127859	0.947519	0.859451	0.61744	0.0180493	0.170972	0.362187	0.83848	0.381581	0.999844
ENSFDAG00000002130	YPEL5	-0.29572	0.332273	0.0237788	0.107413	-0.0589003	-0.0904795	-0.293577	0.0520025	0.0120497	0.000576818	0.0134656	0.0172288	0.0116541	0.0151445	0.194705	0.00247019	0.322134	0.35463	0.653623	0.401959	0.017052	0.743177	0.999844
ENSFDAG00000002131	ENSFDAG00000002131	-0.149292	0.139537	0.00972515	-0.195166	0.0680886	0.116018	0.0454956	0.0542465	0.0125696	0.000601709	0.0140467	0.0179723	0.012157	0.015798	0.52153	0.213279	0.691763	0.0996178	0.611528	0.292695	0.717377	0.587912	0.999844
ENSFDAG00000002135	ENSFDAG00000002135	0.573196	-0.101054	-0.0644427	0.160713	-0.120468	-0.0720048	0.126672	0.144595	0.0335044	0.00160386	0.0374416	0.0479053	0.0324047	0.0421098	0.131709	0.580893	0.107588	0.406219	0.582043	0.689158	0.537043	0.759102	0.999844
ENSFDAG00000002147	FHL2	-1.32679	0.496936	0.133785	-0.103351	-0.0670887	-0.0952261	0.0467005	0.216075	0.0139718	0.00270115	0.0391298	0.0442855	0.0140114	0.0183836	0.00431298	2.62e-05	0.0100486	0.601344	0.749878	0.42112	0.73052	0.806406	0.999844
ENSFDAG00000002149	NDC80	0.457224	-0.0678785	-0.049088	-0.0595775	0.0668061	-0.12829	0.119958	0.102319	0.0237087	0.00113494	0.0264948	0.0338992	0.0229305	0.0297981	0.152893	0.659331	0.145089	0.714352	0.71672	0.396884	0.487106	0.826038	0.999844
ENSFDAG00000002150	ENSFDAG00000002150	-0.169675	-0.0484141	0.0246052	0.321331	-0.150359	-0.0411989	-0.309186	0.1522	0.0352668	0.00168823	0.0394111	0.0504252	0.0341093	0.0443248	0.66362	0.796558	0.549278	0.10553	0.503121	0.823478	0.141948	0.598294	0.999844
ENSFDAG00000002151	ENSFDAG00000002151	0.464166	-0.0592602	-0.0561496	-0.365121	0.000660261	0.501629	0.0603822	0.541604	0.125497	0.00600754	0.140244	0.179438	0.121378	0.15773	0.528228	0.867149	0.4688	0.329572	0.998756	0.149913	0.879157	0.740211	0.999844
ENSFDAG00000002152	SMIM7	0.173299	-0.0671348	-0.0130261	-0.0423428	0.0533129	-0.0365765	-0.127385	0.0620604	0.0143802	0.000688381	0.01607	0.0205611	0.0139082	0.0180736	0.486651	0.575588	0.619558	0.738365	0.710042	0.756449	0.343367	0.828	0.999844
ENSFDAG00000002153	ENSFDAG00000002153	-0.200706	-0.742893	-0.01254	1.75395	1.89167	0.324682	0.240396	3.34211	0.77441	0.037071	0.865413	1.10727	0.748991	0.973311	0.912579	0.398563	0.948071	0.0593741	0.0722232	0.707539	0.807487	0.525461	0.999844
ENSFDAG00000002161	TFAM	0.057365	0.0626234	-0.00763844	0.00542674	0.019106	-0.0880602	-0.0187461	0.0378524	0.0087709	0.000419864	0.00980159	0.0125408	0.00848301	0.0110236	0.768109	0.503704	0.709314	0.956287	0.86453	0.33902	0.858295	0.860841	0.999844
ENSFDAG00000002163	ENSFDAG00000002163	0.019113	0.172709	-0.00650879	-0.0791537	0.0226949	-0.0375539	-0.117747	0.104842	0.0242932	0.00116292	0.027148	0.0347349	0.0234958	0.0305327	0.952929	0.267827	0.848632	0.630943	0.90308	0.806459	0.500405	0.809624	0.999844
ENSFDAG00000002171	RFTN1	0.997505	-0.749325	-0.0866082	0.154438	-0.00743368	0.170193	0.13562	0.22401	0.0519059	0.00248474	0.0580055	0.0742162	0.0502022	0.0652376	0.0350682	0.0010055	0.0823034	0.521368	0.978231	0.4475	0.595434	0.789669	0.999844
ENSFDAG00000002172	RNF19B	0.0665376	-0.355562	0.00983132	0.137554	0.138921	-0.161568	0.00396136	0.179514	0.0415957	0.00199119	0.0464837	0.0594744	0.0402304	0.0522792	0.875211	0.0812682	0.825621	0.523473	0.568921	0.420518	0.986177	0.789933	0.999844
ENSFDAG00000002175	TNS1	0.540217	-0.364199	-0.0485979	0.236727	-0.14264	0.0490383	0.0273443	0.308701	0.07153	0.00342414	0.0799357	0.102275	0.0691821	0.0899019	0.330903	0.17328	0.406255	0.402428	0.655582	0.8521	0.927336	0.758058	0.999844
ENSFDAG00000002185	DCAKD	0.26772	-0.190833	-0.0275756	0.235422	-0.118397	0.236945	-0.112706	0.17782	0.0412032	0.0019724	0.0460451	0.0589131	0.0398507	0.0517859	0.525508	0.34715	0.534659	0.272587	0.625698	0.23525	0.620411	0.725621	0.999844
ENSFDAG00000002189	RFX2	0.443928	-0.543853	-0.0397672	0.341217	0.262932	0.0563912	0.168487	0.350619	0.0812429	0.0038891	0.09079	0.116163	0.0785763	0.10211	0.453427	0.0563854	0.523685	0.257453	0.440438	0.840565	0.598007	0.71959	0.999844
ENSFDAG00000002195	ENSFDAG00000002195	-0.113385	0.0663806	0.0115686	0.0244465	0.0115597	-0.0914293	-0.011872	0.0319692	0.00740767	0.000354606	0.00827817	0.0105916	0.00716453	0.00931028	0.525985	0.440554	0.538991	0.788169	0.910568	0.280067	0.902077	0.83494	0.999844
ENSFDAG00000002201	AAMDC	-0.013384	0.162486	-0.00389683	0.244901	-0.147087	0.0188271	-0.26859	0.0961822	0.0222867	0.00106686	0.0249056	0.0318659	0.0215552	0.0280108	0.965577	0.276412	0.905034	0.120705	0.409957	0.897963	0.108533	0.617913	0.999844
ENSFDAG00000002202	EXTL2	-0.510918	0.205407	0.0599659	-0.117415	-0.126881	-0.0791161	-0.0771032	0.127216	0.0112296	0.00156677	0.0243941	0.028543	0.0111928	0.0146971	0.152013	0.0525796	0.129782	0.452192	0.452647	0.454571	0.524778	0.770408	0.999844
ENSFDAG00000002205	FBXO34	-0.308962	0.0401721	0.0457259	-0.164582	-0.0822987	-0.26779	-0.0389322	0.0463623	0.0107428	0.000514257	0.0120052	0.0153602	0.0103901	0.013502	0.151315	0.698324	0.0437601	0.133072	0.506665	0.00861062	0.737587	0.629445	0.999844
ENSFDAG00000002208	ENSFDAG00000002208	0.065085	-0.186671	-0.0250253	0.659251	0.156912	0.0249888	0.492846	0.256367	0.0594037	0.00284366	0.0663844	0.0849366	0.0574539	0.074661	0.897719	0.443739	0.638863	0.0105067	0.590297	0.916969	0.0712781	0.323947	0.999844
ENSFDAG00000002209	GBF1	0.228523	-0.205158	-0.0176063	-0.0362069	-0.0505035	0.053826	0.11391	0.129935	0.0301076	0.00144125	0.0336456	0.0430484	0.0291193	0.0378405	0.526101	0.237062	0.642817	0.843522	0.807686	0.752436	0.55816	0.839052	0.999844
ENSFDAG00000002211	DRAP1	0.128409	-0.0359836	-0.00650624	-0.32422	0.0506207	-0.0231623	0.0224798	0.0794485	0.0184093	0.000881252	0.0205726	0.0263219	0.017805	0.0231375	0.648702	0.790849	0.826518	0.023793	0.755032	0.862192	0.882511	0.411451	0.999844
ENSFDAG00000002222	ETHE1	0.301223	-0.160308	-0.0308992	0.132216	0.135803	-0.0499842	0.0434978	0.0756419	0.0175272	0.000839029	0.0195869	0.0250608	0.0169519	0.0220289	0.273414	0.225945	0.286089	0.344803	0.390976	0.701049	0.769469	0.742729	0.999844
ENSFDAG00000002224	CCDC189	-0.522088	0.287771	0.0581265	0.00284711	-0.127919	-0.16939	-0.269507	0.0816721	0.0189245	0.000905916	0.0211483	0.0270586	0.0183033	0.0237851	0.0677197	0.0364497	0.0534568	0.98438	0.436778	0.21055	0.0805503	0.861287	0.999844
ENSFDAG00000002230	METTL15	-0.0879001	-0.210376	0.019286	0.0410564	0.119077	-0.0638377	0.0280117	0.0858337	0.0198888	0.000952078	0.022226	0.0284374	0.019236	0.0249971	0.764157	0.135769	0.531947	0.783015	0.480108	0.645317	0.859374	0.833489	0.999844
ENSFDAG00000002232	VIRMA	-0.125727	0.00731239	0.00913736	0.0943047	0.0772648	0.0218891	0.0475392	0.0334987	0.0077621	0.000371572	0.00867424	0.0110984	0.00750732	0.00975573	0.492125	0.933853	0.635484	0.311274	0.463304	0.800554	0.630298	0.737181	0.999844
ENSFDAG00000002234	SPAG1	-0.352071	0.0508409	0.0455721	-0.232382	0.0443565	-0.239752	0.168133	0.147619	0.0342051	0.0016374	0.0382247	0.0489072	0.0330824	0.0429905	0.359485	0.783397	0.260074	0.234602	0.841033	0.187454	0.417425	0.708608	0.999844
ENSFDAG00000002238	HSD17B11	-0.718184	0.0653407	0.0721268	0.691883	0.271464	-0.0632478	-0.074567	0.0998141	0.0127489	0.00119592	0.020991	0.0255807	0.0125832	0.0165181	0.0230134	0.562798	0.0370083	1.79e-06	0.0896425	0.572868	0.56179	0.0521789	0.999844
ENSFDAG00000002239	PMPCA	0.462757	-0.203607	-0.0504095	0.209842	0.093841	0.0782528	-0.0186846	0.129058	0.0299045	0.00143153	0.0334187	0.0427581	0.028923	0.0375853	0.1977	0.239036	0.182751	0.251018	0.649958	0.645425	0.923221	0.716609	0.999844
ENSFDAG00000002241	ENSFDAG00000002241	-0.157515	0.120684	0.0178417	-0.167152	-0.0539208	-0.0101568	-0.0469647	0.0307803	0.00713219	0.000341418	0.00797031	0.0101977	0.00689809	0.00896403	0.369285	0.153	0.33425	0.0611652	0.593373	0.902669	0.619864	0.529975	0.999844
ENSFDAG00000002244	KLK13	-0.348688	1.03316	-0.0567606	0.745048	0.659739	0.505528	0.246591	0.612948	0.142028	0.0067989	0.158718	0.203075	0.137366	0.178507	0.656049	0.00611686	0.491214	0.0614662	0.143191	0.172577	0.559458	0.529975	0.999844
ENSFDAG00000002252	CRISPLD2	-0.109348	-0.759118	0.0529661	0.0232315	-0.134845	0.0624702	0.050721	0.323237	0.0748982	0.00358538	0.0836997	0.107091	0.0724398	0.0941352	0.847483	0.00554075	0.376391	0.935999	0.680297	0.816456	0.868696	0.856248	0.999844
ENSFDAG00000002254	RF00001	0.28646	-0.0638795	-0.0631272	1.64328	0.517754	-0.071036	-0.400149	1.01672	0.235587	0.0112776	0.263272	0.336848	0.227855	0.296096	0.776338	0.895294	0.552218	0.00136169	0.372347	0.881699	0.462114	0.156667	0.999844
ENSFDAG00000002257	WTAP	-0.0360638	-0.00198287	0.00472847	0.105785	0.0310295	-0.0878689	-0.0530414	0.0207726	0.00481329	0.000230413	0.00537891	0.00688214	0.0046553	0.00604955	0.802416	0.977199	0.755416	0.149199	0.708378	0.197802	0.49527	0.64482	0.999844
ENSFDAG00000002259	SPON2	-0.722919	-0.350939	0.114142	-0.500558	-0.639557	0.0229377	0.203915	0.333127	0.0771898	0.00369508	0.0862606	0.110368	0.0746562	0.0970154	0.21038	0.206539	0.0604177	0.0883234	0.0542139	0.933097	0.512674	0.574051	0.999844
ENSFDAG00000002261	ATP6V1D	-0.217043	0.258189	0.0111783	0.139053	0.0251075	0.020636	-0.160695	0.015424	0.00357395	0.000171085	0.00399393	0.00511011	0.00345664	0.00449189	0.08053	1.57e-05	0.392767	0.0277868	0.725417	0.725593	0.0164999	0.43294	0.999844
ENSFDAG00000002265	ENSFDAG00000002265	-0.016369	0.0147556	-0.0100093	0.0664386	0.108274	0.186068	0.170246	0.179299	0.0415459	0.00198881	0.0464281	0.0594032	0.0401823	0.0522167	0.969164	0.94229	0.822412	0.757823	0.656867	0.353289	0.456255	0.831418	0.999844
ENSFDAG00000002274	ENSFDAG00000002274	0.121841	-0.0710658	-0.0091809	0.0941425	-0.0107599	-0.0473718	-0.0860751	0.0567183	0.0131424	0.000629126	0.0146868	0.0187912	0.012711	0.0165179	0.608931	0.535321	0.714343	0.437263	0.937436	0.674357	0.503029	0.768006	0.999844
ENSFDAG00000002277	ENSFDAG00000002277	0.0411109	-0.187158	0.00983272	0.041424	-0.0678868	-0.210545	0.00617584	0.0929492	0.0215375	0.001031	0.0240685	0.0307948	0.0208306	0.0270693	0.892735	0.202205	0.759432	0.789461	0.698865	0.144621	0.970057	0.835182	0.999844
ENSFDAG00000002278	PAM	-0.671254	0.202348	0.0857146	-0.53037	0.0620614	-0.337974	0.0797386	0.241695	0.0560038	0.00268091	0.062585	0.0800755	0.0541656	0.070388	0.172134	0.392525	0.0978349	0.0340027	0.826403	0.146451	0.763756	0.461048	0.999844
ENSFDAG00000002280	SLIT2	-0.663086	-0.295815	0.100874	-0.262972	-0.0106053	-0.239305	0.140789	0.117045	0.0271209	0.00129828	0.0303079	0.038778	0.0262307	0.0340867	0.0526016	0.0724541	0.00511674	0.130907	0.95705	0.139524	0.445724	0.628363	0.999844
ENSFDAG00000002281	CPSF6	0.12693	0.0168907	-0.0181844	0.0240641	-0.0705251	-0.0346666	0.169462	0.037536	0.00869757	0.000416354	0.00971965	0.012436	0.00841209	0.0109315	0.51237	0.856279	0.37283	0.807164	0.527114	0.705452	0.105058	0.838154	0.999844
ENSFDAG00000002285	RAD23A	0.151773	-0.0204576	-0.0125396	-0.294806	0.0947657	0.0368062	0.0188042	0.0510138	0.0118206	0.000565852	0.0132096	0.0169013	0.0114326	0.0148566	0.501602	0.850749	0.598091	0.0103168	0.466039	0.730673	0.877393	0.321986	0.999844
ENSFDAG00000002291	DGAT1	-0.112421	-0.246492	0.0188697	0.253513	0.233004	-0.0483015	-0.0225024	0.132822	0.0307765	0.00147328	0.0343932	0.0440049	0.0297664	0.0386812	0.757725	0.160006	0.622993	0.171629	0.26668	0.779507	0.90891	0.662235	0.999844
ENSFDAG00000002299	ENSFDAG00000002299	-1.1323	0.141812	0.138513	-0.281691	0.0714218	-0.262025	-0.0867008	0.334621	0.077536	0.00371165	0.0866475	0.110863	0.074991	0.0974505	0.050297	0.610552	0.0229928	0.338586	0.830153	0.33865	0.781216	0.742729	0.999844
ENSFDAG00000002300	RAP2A	-0.486037	-0.151452	0.0699859	-0.113474	0.0190161	-0.146252	0.0280704	0.12386	0.0287001	0.00137388	0.0320727	0.041036	0.0277581	0.0360715	0.16727	0.371325	0.0590056	0.526328	0.92521	0.38004	0.882503	0.790732	0.999844
ENSFDAG00000002303	MLH1	0.268034	-0.0799966	-0.0267601	0.01858	0.0336712	-0.0744051	0.00909225	0.0481547	0.0111581	0.000534138	0.0124693	0.0159541	0.0107918	0.0140239	0.221921	0.448861	0.246915	0.867851	0.789795	0.473847	0.9388	0.842878	0.999844
ENSFDAG00000002311	SLC22A5	0.0687842	-0.265921	-0.00312359	0.376406	0.278608	-0.23223	0.066539	0.324405	0.075169	0.00359834	0.0840023	0.107478	0.0727017	0.0944755	0.903876	0.33209	0.958471	0.194044	0.395418	0.389082	0.828614	0.678286	0.999844
ENSFDAG00000002313	KLHL22	0.573407	0.0109564	-0.0672133	0.224694	-0.209082	0.137254	-0.194271	0.302554	0.0701058	0.00335597	0.0783441	0.100239	0.0678047	0.0881119	0.297196	0.966993	0.245953	0.422111	0.509006	0.598122	0.512808	0.764638	0.999844
ENSFDAG00000002315	TUT7	0.208093	-0.0528804	-0.0254425	0.0784882	0.0612505	0.0287638	0.0290767	0.0581073	0.0134642	0.000644534	0.0150464	0.0192514	0.0130223	0.0169224	0.387993	0.648587	0.316266	0.522261	0.65889	0.800995	0.823132	0.789669	0.999844
ENSFDAG00000002317	CX3CR1	1.65976	-0.340363	-0.202832	0.417627	0.73437	-0.0723554	0.541985	0.812394	0.101817	0.00975069	0.169922	0.206654	0.100551	0.132005	0.0655545	0.28612	0.0399674	0.311	0.106214	0.819506	0.135768	0.737181	0.999844
ENSFDAG00000002318	MTFMT	-0.198749	-0.0775893	0.0266872	0.00452326	-0.159488	0.0853384	0.0428313	0.0405587	0.00939798	0.000449882	0.0105024	0.0134374	0.00908951	0.0118118	0.323704	0.423503	0.208315	0.964795	0.168869	0.370731	0.693509	0.860841	0.999844
ENSFDAG00000002323	RF00001	0.302416	-0.0995812	-0.0496856	-0.303912	0.259895	0.853184	0.0716248	0.818429	0.189641	0.00907811	0.211926	0.271152	0.183416	0.238348	0.738166	0.819124	0.602036	0.509144	0.617706	0.0463537	0.883362	0.788268	0.999844
ENSFDAG00000002324	ZEB1	-0.859768	0.56583	0.0680391	-0.106262	0.128188	0.177428	0.114752	0.0957257	0.0117548	0.00115106	0.0199071	0.0241569	0.0116157	0.0152503	0.00545496	1.8e-07	0.0449159	0.451368	0.409507	0.0997087	0.352774	0.770408	0.999844
ENSFDAG00000002327	STC2	-0.551591	-0.266056	0.0770402	-0.204557	0.209306	-0.0571691	0.180061	0.219868	0.0509463	0.00243881	0.0569332	0.0728441	0.0492741	0.0640315	0.239455	0.238504	0.118756	0.39128	0.438042	0.796759	0.476726	0.754346	0.999844
ENSFDAG00000002328	RBM10	0.697229	-0.287716	-0.0753521	0.0858821	0.0612632	0.180988	0.117646	0.168117	0.038955	0.00186478	0.0435327	0.0556986	0.0376764	0.0489603	0.0890425	0.144909	0.0809946	0.680619	0.795185	0.351115	0.594945	0.821377	0.999844
ENSFDAG00000002330	ENSFDAG00000002330	-0.224463	-0.757287	0.0723666	-0.392854	0.385626	-0.292416	0.182047	0.246318	0.0570752	0.00273219	0.0637822	0.0816072	0.0552018	0.0717345	0.651075	0.00152524	0.166216	0.119817	0.177048	0.213284	0.496692	0.617606	0.999844
ENSFDAG00000002331	ENSFDAG00000002331	-0.812804	-0.124275	0.10086	0.164678	0.381742	-0.510614	0.133884	0.387818	0.0898624	0.00430172	0.100422	0.128487	0.0869129	0.112943	0.19183	0.678458	0.124099	0.603301	0.286886	0.0832719	0.69035	0.806406	0.999844
ENSFDAG00000002337	RPL15	0.232146	-0.0181354	-0.0243406	-0.156755	0.0438289	0.028206	0.0145119	0.0289412	0.00670604	0.000321019	0.00749409	0.00958844	0.00648593	0.00842844	0.17238	0.824735	0.174298	0.0701779	0.654445	0.726165	0.874401	0.551469	0.999844
ENSFDAG00000002338	HK1	0.629522	-0.253267	-0.0724988	0.2036	0.0354011	0.253941	0.143723	0.265644	0.0615531	0.00294655	0.0687864	0.0880099	0.0595327	0.0773625	0.221931	0.307335	0.181682	0.437575	0.905014	0.297982	0.605347	0.768006	0.999844
ENSFDAG00000002340	ACTR8	0.0882123	0.0924444	-0.0145611	0.0938411	0.001012	-0.0585977	-0.0593551	0.0232611	0.00538989	0.000258014	0.00602327	0.00770658	0.00521298	0.00677424	0.563007	0.207962	0.364667	0.226609	0.990802	0.417026	0.470815	0.703926	0.999844
ENSFDAG00000002346	ENSFDAG00000002346	0.535652	-0.188183	-0.0595908	-0.0658894	0.145768	0.132846	0.141923	0.189728	0.0439625	0.00210449	0.0491287	0.0628585	0.0425195	0.0552539	0.218791	0.369446	0.193947	0.766262	0.560968	0.519413	0.545996	0.831683	0.999844
ENSFDAG00000002349	ENSFDAG00000002349	-0.585994	0.20002	0.0316074	0.668839	0.643837	0.343847	-0.215614	0.412942	0.0742259	0.00475693	0.0970291	0.122291	0.0724398	0.0947619	0.36182	0.462845	0.646755	0.0317781	0.065606	0.20141	0.483664	0.44841	0.999844
ENSFDAG00000002350	ADAMTSL5	1.33506	-0.802323	-0.113788	-0.448205	0.199163	0.319472	0.190157	0.557805	0.129251	0.00618725	0.144439	0.184805	0.125008	0.162448	0.0738484	0.0256359	0.148011	0.238268	0.643158	0.366223	0.637071	0.710962	0.999844
ENSFDAG00000002351	RF00401	-0.0808551	1.08977	-0.044708	0.423738	-0.550759	0.0822709	-0.229328	0.812758	0.188327	0.00901521	0.210457	0.269273	0.182145	0.236697	0.928536	0.0120328	0.637736	0.35566	0.288524	0.84714	0.637377	0.743177	0.999844
ENSFDAG00000002355	CRLF1	-0.974878	-0.11066	0.126433	-0.176921	0.0970336	-0.296682	0.0853289	0.206718	0.0478992	0.00229294	0.053528	0.0684873	0.0463271	0.0602018	0.0320185	0.613123	0.00828177	0.444452	0.710801	0.168081	0.728013	0.769216	0.999844
ENSFDAG00000002357	ODC1	0.0516959	-0.214522	0.00226051	-0.229465	0.148394	0.0633106	0.215678	0.0571589	0.0132445	0.000634013	0.0148008	0.0189372	0.0128097	0.0166462	0.828809	0.0623165	0.928466	0.0592766	0.280879	0.575903	0.0945907	0.525153	0.999844
ENSFDAG00000002358	ENSFDAG00000002358	-0.747086	-0.269733	0.0744631	0.227013	0.752883	-0.167927	0.731318	0.710499	0.164632	0.00788094	0.183978	0.235394	0.159228	0.206916	0.375447	0.506192	0.401589	0.596627	0.120715	0.673876	0.107898	0.806406	0.999844
ENSFDAG00000002360	LCE2A	-3.61217	1.03782	0.383581	0.364592	-0.745447	-0.360199	0.426537	1.65917	0.104226	0.0207645	0.299131	0.337544	0.104571	0.13719	0.00504284	0.00130602	0.00776934	0.505017	0.199466	0.265333	0.249492	0.786541	0.999844
ENSFDAG00000002364	CDC40	0.102298	0.0263102	-0.00875668	-0.0509437	-0.0400092	-0.165869	0.0563221	0.0376159	0.00871609	0.00041724	0.00974034	0.0124624	0.00843	0.0109547	0.597882	0.778086	0.668147	0.605727	0.72005	0.0708319	0.590495	0.806512	0.999844
ENSFDAG00000002374	MIER3	-0.103925	-0.00333233	0.0141447	0.0776444	-0.0216796	-0.215407	0.0671446	0.103828	0.0240583	0.00115167	0.0268855	0.0343991	0.0232687	0.0302375	0.747056	0.98286	0.676823	0.635832	0.906947	0.157912	0.699397	0.810996	0.999844
ENSFDAG00000002377	BRCA2	0.358638	0.14749	-0.0516252	-0.0971849	0.125236	0.0591203	0.0365515	0.083149	0.0192667	0.000922299	0.0215308	0.0275479	0.0186343	0.0242152	0.213598	0.287977	0.089148	0.507765	0.450522	0.664948	0.814295	0.787786	0.999844
ENSFDAG00000002379	BRMS1	0.1726	-0.0528517	-0.0185743	-0.0847025	0.0269476	0.0532932	0.0767402	0.0528459	0.0122451	0.000586173	0.013684	0.0175083	0.0118432	0.0153901	0.452763	0.632924	0.442971	0.469014	0.838622	0.62434	0.536188	0.775828	0.999844
ENSFDAG00000002387	IGIP	-0.554326	0.45999	0.0622606	0.13931	0.193542	-0.479638	-0.753371	0.518297	0.120096	0.00574901	0.134209	0.171716	0.116154	0.150942	0.441315	0.184394	0.411567	0.703745	0.64046	0.159329	0.052487	0.825209	0.999844
ENSFDAG00000002389	CRKL	0.164919	-0.0666387	-0.0202791	0.0377466	0.0507622	0.0425154	0.0748937	0.103493	0.0239806	0.00114795	0.0267986	0.034288	0.0231935	0.0301398	0.6082	0.666959	0.549486	0.817641	0.783978	0.780117	0.666181	0.838154	0.999844
ENSFDAG00000002392	SSR2	0.121503	-0.0496124	-0.0113004	-0.139578	0.0222133	0.0209441	0.0985823	0.0674558	0.0156304	0.000748228	0.0174672	0.0223487	0.0151174	0.0196449	0.639916	0.691492	0.679518	0.290922	0.881878	0.864741	0.481835	0.730121	0.999844
ENSFDAG00000002400	RF00026	-0.77617	-0.57438	0.116681	0.0837022	0.132265	-0.526496	0.645929	0.717187	0.166182	0.00795513	0.18571	0.23761	0.160727	0.208864	0.359395	0.158838	0.190802	0.845995	0.78613	0.189095	0.15755	0.839052	0.999844
ENSFDAG00000002401	NKIRAS1	0.213979	0.0184443	-0.0328357	0.357561	0.0575264	0.0810262	-0.148902	0.114645	0.0265647	0.00127166	0.0296864	0.0379828	0.0256928	0.0333877	0.52741	0.9099	0.357159	0.037963	0.767863	0.613209	0.415127	0.471148	0.999844
ENSFDAG00000002405	CXCL10	-0.227532	0.186716	-0.0180926	0.914547	0.37717	0.515451	-0.106673	1.39554	0.323365	0.0154795	0.361364	0.462354	0.312751	0.406418	0.847267	0.742648	0.88438	0.128168	0.579107	0.356687	0.867112	0.62706	0.999844
ENSFDAG00000002406	ENSFDAG00000002406	-0.029804	-0.00149924	0.0012995	0.10223	0.0692801	-0.00509173	-0.0469618	0.061927	0.0143493	0.000686902	0.0160355	0.0205169	0.0138783	0.0180348	0.904668	0.990014	0.960455	0.419493	0.628617	0.965525	0.726568	0.763069	0.999844
ENSFDAG00000002413	IMPA1	0.0515432	0.0631436	-0.00667246	0.112793	-0.190514	-0.00999073	-0.0945585	0.0505444	0.0117118	0.000560644	0.0130881	0.0167458	0.0113274	0.0147199	0.818664	0.559577	0.778096	0.324167	0.14096	0.925211	0.435757	0.739668	0.999844
ENSFDAG00000002414	MCTP2	-0.348707	-0.0980521	0.0394984	0.104367	-0.00674462	0.0677613	0.119037	0.134654	0.0312011	0.0014936	0.0348676	0.0446119	0.030177	0.0392148	0.34197	0.578825	0.306768	0.576214	0.974526	0.696484	0.547762	0.803968	0.999844
ENSFDAG00000002416	CSTF2	0.0790615	-0.208412	0.000307175	-0.115753	0.0984851	-0.0363444	0.154149	0.0429232	0.00994586	0.000476109	0.0111146	0.0142208	0.00961941	0.0125004	0.702751	0.0366369	0.988768	0.272223	0.408881	0.710962	0.167979	0.725095	0.999844
ENSFDAG00000002417	ENO2	-0.272645	-0.0128994	0.022005	0.0935208	0.235141	0.128333	0.0621641	0.0896125	0.0207644	0.000993993	0.0232045	0.0296894	0.0200828	0.0260976	0.362412	0.92867	0.485203	0.539258	0.172356	0.365158	0.700382	0.792978	0.999844
ENSFDAG00000002419	SDF2L1	0.193743	-0.0631188	-0.0311108	0.336481	0.274807	0.0570723	-0.0437626	0.123823	0.0286913	0.00137346	0.0320629	0.0410234	0.0277496	0.0360605	0.581917	0.70942	0.401207	0.0602257	0.174848	0.731894	0.817738	0.527961	0.999844
ENSFDAG00000002421	AIF1L	-0.293775	0.0348216	0.0468054	-0.461902	-0.193174	-0.0624489	0.076308	0.259722	0.0601809	0.00288086	0.0672529	0.0860479	0.0582056	0.0756378	0.564312	0.887124	0.383188	0.0748922	0.510194	0.795754	0.781427	0.56066	0.999844
ENSFDAG00000002422	C3AR1	0.66972	0.0554599	-0.110595	1.76004	1.31882	-0.242035	0.22644	1.44977	0.0467618	0.0184691	0.24427	0.259929	0.0472564	0.0618665	0.578063	0.797589	0.415763	0.000369263	0.00968798	0.26554	0.362619	0.102293	0.672642
ENSFDAG00000002438	ENSFDAG00000002438	-0.285822	0.214435	0.0210574	0.110542	0.0585004	-0.0207604	-0.0804739	0.0537899	0.0124638	0.000596644	0.0139285	0.017821	0.0120547	0.015665	0.217807	0.054764	0.388645	0.348943	0.661226	0.850026	0.520245	0.742925	0.999844
ENSFDAG00000002441	ENSFDAG00000002441	0.543168	-0.490235	-0.0540273	0.387694	0.173017	0.0135158	0.282551	0.199657	0.0409161	0.00225683	0.0492578	0.0626845	0.0397463	0.0518451	0.224137	0.0153684	0.255425	0.0806663	0.489535	0.945949	0.214636	0.567662	0.999844
ENSFDAG00000002448	UHRF2	-0.30048	-0.00268277	0.0410386	-0.0856378	-0.0927057	-0.0673425	-0.0320378	0.0716032	0.0165914	0.000794232	0.0185411	0.0237227	0.0160468	0.0208528	0.26147	0.983383	0.145339	0.529399	0.547241	0.594995	0.824422	0.791153	0.999844
ENSFDAG00000002450	ANGEL1	1.16374	0.238078	-0.161951	-0.154822	-0.270741	0.827433	0.0733544	0.831184	0.192596	0.00921959	0.215229	0.275378	0.186275	0.242063	0.201794	0.587478	0.0916682	0.73859	0.605904	0.055219	0.881479	0.828002	0.999844
ENSFDAG00000002451	MIR133A1	0.187374	0.479305	-0.0486015	-0.240733	0.071271	0.444596	-0.219738	0.649098	0.150404	0.00719987	0.168079	0.215051	0.145468	0.189035	0.816095	0.216497	0.566794	0.557075	0.877855	0.243741	0.613279	0.796892	0.999844
ENSFDAG00000002453	DVL1	0.273029	-0.29097	-0.0236821	0.32378	0.0164073	-0.0444857	0.0335562	0.183406	0.0424977	0.00203437	0.0474917	0.060764	0.0411028	0.0534128	0.523778	0.158111	0.599544	0.137349	0.946932	0.826319	0.884558	0.635599	0.999844
ENSFDAG00000002454	RF00001	0.337909	0.271552	-0.0390959	-0.0843996	-0.387475	0.174883	-0.488467	0.633374	0.146761	0.00702546	0.164007	0.209842	0.141944	0.184455	0.671136	0.478425	0.640902	0.834912	0.397632	0.642517	0.255397	0.838364	0.999844
ENSFDAG00000002455	FDX1	0.25447	-0.128937	-0.0256097	0.192206	0.405133	-0.01495	-0.314028	0.202418	0.0469029	0.00224525	0.0524146	0.0670628	0.0453635	0.0589496	0.571664	0.551605	0.588872	0.401167	0.117716	0.944041	0.195878	0.757285	0.999844
ENSFDAG00000002456	SMTN	0.949413	-0.42379	-0.099166	0.0840555	-0.155704	0.377951	0.135918	0.42097	0.0975442	0.00466945	0.109007	0.139471	0.0943425	0.122598	0.143389	0.174811	0.146722	0.799041	0.676734	0.218509	0.697881	0.837405	0.999844
ENSFDAG00000002458	RF02216	-0.140425	-0.0740811	0.0251331	-0.080767	0.0291374	-0.143379	0.0276633	0.101279	0.0234677	0.0011234	0.0262255	0.0335546	0.0226974	0.0294952	0.659033	0.628681	0.453341	0.617964	0.873618	0.341251	0.872035	0.808274	0.999844
ENSFDAG00000002459	ENSFDAG00000002459	-0.0263137	0.0648151	-0.00145152	-0.0256714	0.0108036	0.100077	0.0489064	0.109234	0.00784097	0.00135958	0.020126	0.0230275	0.00784873	0.0103011	0.936542	0.464189	0.968599	0.856403	0.943243	0.258635	0.629903	0.840951	0.999844
ENSFDAG00000002468	ENSFDAG00000002468	0.435062	-0.495729	-0.0349675	-0.0671487	0.176711	0.22432	0.193332	0.389733	0.0903063	0.00432297	0.100918	0.129122	0.0873422	0.113501	0.485868	0.0990193	0.594843	0.832595	0.622881	0.447838	0.566064	0.838154	0.999844
ENSFDAG00000002469	GLO1	-0.317027	0.194014	0.0340351	-0.175891	0.0286591	-0.0538035	-0.112789	0.0637836	0.0147795	0.000707495	0.0165163	0.021132	0.0142944	0.0185755	0.209376	0.110512	0.200696	0.171113	0.843712	0.652699	0.407924	0.661978	0.999844
ENSFDAG00000002470	RF00001	0.334547	-0.796707	-0.00525341	-0.120786	-0.0952447	0.199387	0.333309	0.61221	0.141857	0.0067907	0.158527	0.20283	0.137201	0.178292	0.668964	0.0344039	0.949169	0.761612	0.832511	0.590376	0.429896	0.831509	0.999844
ENSFDAG00000002473	2020-09-06	0.510766	-0.321111	-0.0352848	0.019383	-0.23568	0.0354012	-0.254496	0.100556	0.0233002	0.00111538	0.0260383	0.0333151	0.0225354	0.0292847	0.107243	0.0354082	0.290733	0.904388	0.196626	0.81357	0.13697	0.851178	0.999844
ENSFDAG00000002474	RF00606	0.834332	-0.326666	-0.0532442	-0.364389	-0.049847	-0.589762	-0.193428	0.563393	0.130546	0.00624922	0.145886	0.186657	0.126261	0.164075	0.266327	0.365935	0.500608	0.340072	0.908147	0.0969648	0.632987	0.742729	0.999844
ENSFDAG00000002475	ENSFDAG00000002475	0.381676	-0.141498	-0.0191991	-0.54008	-0.338188	0.21649	-0.26765	0.7388	0.17119	0.00819486	0.191306	0.24477	0.165571	0.215158	0.657007	0.73236	0.832041	0.216909	0.494251	0.594696	0.563929	0.695441	0.999844
ENSFDAG00000002478	TLDC2	0.428475	-0.248977	-0.0515147	0.337805	0.200025	0.0313166	0.142042	0.0877173	0.0203252	0.000972971	0.0227137	0.0290615	0.0196581	0.0255456	0.147977	0.0807437	0.0986344	0.0249992	0.240659	0.823256	0.374161	0.416266	0.999844
ENSFDAG00000002480	CCDC24	-1.07083	-0.12723	0.137173	-0.172924	-0.210249	-0.0763336	0.131951	0.14506	0.0181753	0.00174112	0.0303387	0.0368959	0.0179495	0.0235643	0.0049304	0.345307	0.0010111	0.320812	0.273703	0.568843	0.39002	0.738579	0.999844
ENSFDAG00000002485	OXA1L	0.094376	0.0925172	-0.0132531	-0.189297	0.02265	-0.0363091	0.10932	0.0196084	0.00454352	0.000217499	0.00507744	0.00649642	0.00439439	0.00571049	0.500331	0.169894	0.368841	0.00789414	0.778698	0.583878	0.147996	0.295749	0.999844
ENSFDAG00000002489	DKKL1	-0.103897	-0.150484	0.0133969	0.0477532	0.179102	0.06775	0.097479	0.052701	0.0122115	0.000584565	0.0136465	0.0174603	0.0118107	0.0153479	0.650854	0.173269	0.579511	0.6827	0.175282	0.533017	0.431376	0.821545	0.999844
ENSFDAG00000002494	ENSFDAG00000002494	0.518032	-0.314234	-0.0605477	0.254561	0.0578556	0.181073	0.225569	0.12926	0.0299513	0.00143377	0.0334709	0.0428249	0.0289682	0.037644	0.149622	0.0694157	0.109812	0.164099	0.779804	0.287382	0.24499	0.654536	0.999844
ENSFDAG00000002496	TK2	-0.227765	0.0142968	0.0464523	-0.443251	-0.0707239	-0.348189	-0.0675273	0.128675	0.0298157	0.00142728	0.0333194	0.0426311	0.0288371	0.0374736	0.525462	0.934013	0.218859	0.0151702	0.731949	0.0403248	0.727215	0.366315	0.999844
ENSFDAG00000002497	FN3K	0.0457489	-0.037821	0.00666952	-0.200192	-0.24639	-0.0928988	0.036316	0.0620965	0.0143886	0.000688781	0.0160794	0.0205731	0.0139163	0.0180841	0.854336	0.752534	0.799396	0.114395	0.0858323	0.430991	0.787119	0.61005	0.999844
ENSFDAG00000002502	ENSFDAG00000002502	0.522463	-0.24886	-0.053428	0.484884	-0.184713	0.187855	-0.303225	0.227073	0.0526157	0.00251871	0.0587987	0.075231	0.0508887	0.0661296	0.272899	0.277956	0.287065	0.0455378	0.500668	0.404988	0.238341	0.493448	0.999844
ENSFDAG00000002503	RF00187	0.370077	-0.348421	-0.0387805	-0.462711	0.906959	0.838774	-0.45117	0.453786	0.105148	0.00503345	0.117504	0.150343	0.101697	0.132154	0.58275	0.282602	0.584644	0.177066	0.019331	0.00853303	0.214577	0.667481	0.836491
ENSFDAG00000002504	TRABD2B	-0.336215	-0.249059	0.0515209	0.133231	-0.279099	-0.208631	0.362294	0.282607	0.0654838	0.00313471	0.073179	0.0936301	0.0633344	0.0823028	0.527094	0.330417	0.357466	0.622362	0.361708	0.4071	0.206641	0.809269	0.999844
ENSFDAG00000002514	CEPT1	-0.0683782	0.151505	-0.00170276	0.14773	0.0587023	-0.0557196	-0.05401	0.0500167	0.0115895	0.000554791	0.0129514	0.0165709	0.0112091	0.0145662	0.759798	0.159331	0.94237	0.194252	0.648377	0.598689	0.654508	0.678693	0.999844
ENSFDAG00000002515	HIF1AN	0.17556	-0.142016	-0.0134521	-0.151442	0.0192983	0.0521259	0.0829732	0.0452793	0.0104918	0.000502243	0.0117247	0.0150014	0.0101474	0.0131865	0.409348	0.165603	0.548339	0.16193	0.874801	0.604836	0.469952	0.652097	0.999844
ENSFDAG00000002516	DKC1	1.03781	-0.127689	-0.117777	-0.0271381	0.0809918	0.0344721	-0.00376994	0.171168	0.00657015	0.00217287	0.0291785	0.0314675	0.00663127	0.00868592	0.0121257	0.115185	0.0115156	0.873769	0.647978	0.672061	0.967734	0.84352	0.999844
ENSFDAG00000002520	DNM1	-0.00283819	0.0708125	-0.0132646	-0.139507	0.3782	0.0756766	0.204965	0.22978	0.053243	0.00254875	0.0594998	0.076128	0.0514954	0.0669181	0.995276	0.758929	0.792749	0.567373	0.170462	0.738768	0.428166	0.80124	0.999844
ENSFDAG00000002521	ZC3H6	-0.0971002	0.0767964	0.00702027	0.0389128	-0.0474012	-0.164741	0.161948	0.0735017	0.0170313	0.00081529	0.0190327	0.0243517	0.0164723	0.0214057	0.720227	0.556223	0.805786	0.777897	0.761314	0.199286	0.268334	0.833353	0.999844
ENSFDAG00000002526	ENSFDAG00000002526	-0.225863	0.174177	0.0183851	0.132729	-0.212403	0.0213559	-0.0601654	0.0361428	0.00837477	0.000400901	0.00935891	0.0119744	0.00809988	0.0105258	0.234815	0.0570025	0.358503	0.170066	0.0522535	0.812433	0.557583	0.660536	0.999844
ENSFDAG00000002527	ENSFDAG00000002527	0.0374345	-0.0681781	0.00395672	-0.1182	0.00384131	-0.0747465	0.0153887	0.0891327	0.0206532	0.00098867	0.0230802	0.0295304	0.0199753	0.0259578	0.900217	0.63521	0.899861	0.436549	0.982166	0.5969	0.923906	0.768006	0.999844
ENSFDAG00000002528	POLR3F	0.121206	-0.0229488	-0.0115991	0.00642118	0.0067633	-0.0878739	0.021795	0.0448367	0.0103892	0.000497334	0.0116101	0.0148547	0.0100482	0.0130576	0.567044	0.821864	0.602981	0.95248	0.955747	0.380689	0.848735	0.859996	0.999844
ENSFDAG00000002532	DCAF15	0.524542	-0.456094	-0.0503045	0.299357	0.0388393	0.0130916	0.267935	0.150265	0.0348184	0.00166676	0.03891	0.0497841	0.0336756	0.0437613	0.176003	0.0145144	0.217887	0.129114	0.86181	0.943127	0.200261	0.62706	0.999844
ENSFDAG00000002538	ADAM9	-0.305511	0.0291997	0.039312	-0.0652446	0.0918529	-0.19564	-0.0251639	0.0672841	0.0155906	0.000746324	0.0174227	0.0222918	0.0150789	0.0195949	0.238878	0.815097	0.15015	0.621097	0.538419	0.111112	0.857337	0.808815	0.999844
ENSFDAG00000002541	KCTD15	-0.524177	-0.0249147	0.067287	-0.0653197	0.0221757	-0.165188	0.000808745	0.0794607	0.0184121	0.000881388	0.0205757	0.026326	0.0178077	0.0231411	0.0629528	0.854317	0.0234235	0.648841	0.891289	0.215764	0.995758	0.815058	0.999844
ENSFDAG00000002546	NEMP1	0.200317	0.241703	-0.0395106	0.0220133	-0.100374	0.144574	0.067053	0.0334016	0.00773957	0.000370494	0.00864907	0.0110662	0.00748554	0.00972742	0.273053	0.00600677	0.0401029	0.812888	0.34	0.0947201	0.496593	0.838154	0.999844
ENSFDAG00000002549	CCDC12	0.311142	-0.406055	-0.00924669	-0.138803	0.00488734	-0.0571567	-0.032528	0.0843595	0.0195472	0.000935726	0.0218442	0.027949	0.0189056	0.0245677	0.284055	0.00368068	0.762437	0.347658	0.976678	0.677635	0.835598	0.742925	0.999844
ENSFDAG00000002551	ZNF532	-0.357407	0.0955393	0.0419587	-0.295332	0.0627314	-0.0545046	0.0419251	0.0780592	0.0180873	0.000865842	0.0202128	0.0258616	0.0174937	0.0227329	0.200813	0.477464	0.153885	0.0377752	0.696475	0.680273	0.780962	0.471148	0.999844
ENSFDAG00000002554	CDR2	-0.350899	0.0881136	0.0326233	0.107964	0.148828	-0.0323646	-0.00727831	0.119037	0.0275824	0.00132037	0.0308237	0.0394379	0.0266771	0.0346667	0.30913	0.59573	0.369292	0.538589	0.453603	0.842925	0.968818	0.792978	0.999844
ENSFDAG00000002557	WRB	0.243383	-0.108617	-0.0196105	-0.194654	-0.166461	0.0913193	0.0740923	0.0167469	0.00388048	0.000185759	0.00433649	0.00554839	0.00375311	0.00487715	0.0600109	0.0812233	0.150195	0.00311734	0.0254337	0.136061	0.288718	0.214621	0.892226
ENSFDAG00000002558	ENSFDAG00000002558	0.291079	-0.564754	-0.0550249	0.635655	0.27791	0.227071	1.35085	1.9231	0.445608	0.0213313	0.497973	0.637139	0.430982	0.560059	0.833747	0.397539	0.706361	0.367706	0.727715	0.729429	0.0710665	0.744986	0.999844
ENSFDAG00000002559	TNNI3	-1.73675	0.234231	0.19656	-0.469272	-0.0686812	0.112668	0.106653	0.328392	0.0760926	0.00364256	0.0850345	0.108799	0.073595	0.0956364	0.00244001	0.395811	0.00112676	0.107559	0.835056	0.677912	0.730188	0.601979	0.999844
ENSFDAG00000002567	SCUBE3	-0.604191	-0.0107936	0.0632604	-0.331232	-0.0412166	0.12549	0.584243	0.878234	0.203498	0.00974148	0.227412	0.290966	0.196819	0.255765	0.51911	0.980911	0.52156	0.487315	0.939093	0.777282	0.247992	0.782433	0.999844
ENSFDAG00000002568	PDCD7	0.422824	0.129349	-0.0519431	-0.0173155	-0.0295989	0.010284	-0.138055	0.100372	0.0232576	0.00111334	0.0259906	0.0332541	0.0224942	0.0292311	0.182006	0.396347	0.119534	0.914467	0.87106	0.945333	0.419392	0.85338	0.999844
ENSFDAG00000002569	PPP1R12A	0.070922	0.0201099	-0.000323137	-0.121366	-0.174895	-0.110725	-0.0469043	0.0226593	0.00525045	0.000251339	0.00586744	0.0075072	0.00507811	0.00659898	0.637534	0.781373	0.983738	0.113095	0.0435342	0.120233	0.563672	0.608458	0.999844
ENSFDAG00000002570	MFAP3L	-0.124129	-0.199474	0.0245496	0.0153042	0.0623055	-0.173078	0.100392	0.132775	0.0307656	0.00147275	0.0343809	0.0439893	0.0297558	0.0386675	0.733364	0.255435	0.522364	0.934219	0.766416	0.315688	0.609677	0.856248	0.999844
ENSFDAG00000002571	MAP3K7	-0.0214256	-0.119291	0.0155929	-0.146959	-0.229957	-0.152201	0.144683	0.0598186	0.0138607	0.000663515	0.0154896	0.0198184	0.0134058	0.0174208	0.930193	0.310943	0.544952	0.23768	0.102369	0.188666	0.272998	0.710962	0.999844
ENSFDAG00000002575	RF00026	-0.455182	0.0707119	0.0281165	0.423566	0.876007	0.113211	-0.185059	0.811356	0.188002	0.00899966	0.210094	0.268809	0.181831	0.236288	0.613324	0.870452	0.76694	0.35544	0.0911029	0.790629	0.703422	0.743177	0.999844
ENSFDAG00000002577	RF00020	0.312229	-0.19799	-0.0285416	-0.082048	0.215896	0.0829966	-0.0581263	0.688895	0.159626	0.0076413	0.178384	0.228236	0.154386	0.200625	0.706783	0.620209	0.74404	0.84597	0.651334	0.832708	0.896747	0.839052	0.999844
ENSFDAG00000002583	DEDD	0.580105	-0.205096	-0.0547179	0.0829438	-0.192017	0.00842993	-0.0704089	0.128194	0.0297042	0.00142194	0.0331948	0.0424717	0.0287292	0.0373335	0.105186	0.234045	0.14676	0.64893	0.351476	0.960334	0.71556	0.815058	0.999844
ENSFDAG00000002587	RF00020	-0.369395	-0.30857	0.0519673	0.240053	-0.539823	0.422298	-0.0270532	0.542446	0.125692	0.00601688	0.140462	0.179717	0.121566	0.157975	0.615986	0.384102	0.502888	0.52184	0.202884	0.225822	0.945734	0.789669	0.999844
ENSFDAG00000002591	ENSFDAG00000002591	0.757821	-0.607666	-0.09139	0.362759	0.566174	0.443892	0.392911	0.626628	0.145198	0.00695063	0.16226	0.207607	0.140432	0.182491	0.338401	0.110774	0.272995	0.367823	0.214018	0.236205	0.3577	0.745071	0.999844
ENSFDAG00000002593	MYNN	-0.192503	0.0468393	0.0248023	0.00221727	-0.0633507	-0.0654941	-0.111276	0.0536381	0.0124286	0.00059496	0.0138892	0.0177707	0.0120207	0.0156208	0.405866	0.67438	0.309234	0.98499	0.634627	0.550266	0.373289	0.861287	0.999844
ENSFDAG00000002596	ENSFDAG00000002596	-0.0665645	-0.0862164	-0.00607938	0.430552	-0.0229323	0.205456	0.167221	0.423876	0.0982176	0.00470168	0.109759	0.140434	0.0949938	0.123444	0.918566	0.783237	0.929351	0.193743	0.951204	0.505022	0.634114	0.678269	0.999844
ENSFDAG00000002599	LOXL1	-0.44819	-0.144338	0.0655043	-0.183885	0.0316728	-0.15084	0.0583386	0.158669	0.0367657	0.00175998	0.0410862	0.0525684	0.035559	0.0462087	0.26052	0.451592	0.118428	0.364305	0.890129	0.423762	0.786091	0.744426	0.999844
ENSFDAG00000002608	SF3B3	0.243548	-0.138384	-0.0255774	-0.0128678	0.0554734	-0.0152621	0.198361	0.0617742	0.0143139	0.000685207	0.0159959	0.0204663	0.0138441	0.0179903	0.327136	0.247411	0.328513	0.918962	0.698192	0.896793	0.139168	0.854799	0.999844
ENSFDAG00000002610	GRAP2	3.11129	-1.13461	-0.290757	-0.770592	-1.45781	-0.009866	0.381205	0.917585	0.114831	0.0110147	0.191844	0.233277	0.113409	0.148885	0.00116215	0.000813238	0.00559864	0.0785193	0.0025419	0.976628	0.323179	0.567475	0.4767
ENSFDAG00000002611	GCC2	-0.182843	0.0645015	0.0255795	-0.209995	0.0395248	-0.111165	-0.034191	0.0500417	0.0115953	0.000555068	0.0129579	0.0165792	0.0112147	0.0145735	0.413724	0.549171	0.277601	0.0650718	0.758871	0.293844	0.777005	0.536462	0.999844
ENSFDAG00000002614	ENSFDAG00000002614	0.29777	0.064443	-0.0463823	0.173736	0.127955	0.121367	-0.0242585	0.11579	0.0268301	0.00128436	0.029983	0.0383622	0.0259495	0.0337212	0.381533	0.694004	0.195589	0.315692	0.513569	0.451199	0.894903	0.737534	0.999844
ENSFDAG00000002617	PSPC1	0.226344	0.0842103	-0.0347185	0.0245192	0.169593	0.101544	-0.0442367	0.083251	0.0192903	0.00092343	0.0215572	0.0275817	0.0186572	0.0242449	0.432767	0.544308	0.253244	0.867372	0.307175	0.45723	0.776333	0.842878	0.999844
ENSFDAG00000002621	ZDHHC6	0.114509	0.0561419	-0.0130176	0.0227901	-0.09787	-0.0882302	-0.0141017	0.0411967	0.00954581	0.000456959	0.0106676	0.0136488	0.00923249	0.0119976	0.57264	0.565548	0.542547	0.825361	0.402184	0.358491	0.897561	0.838154	0.999844
ENSFDAG00000002624	RPS6KB1	-0.130356	0.0267375	0.0177151	-0.116639	-0.0115843	-0.0962543	0.0635878	0.0313723	0.00726937	0.000347985	0.00812362	0.0103939	0.00703077	0.00913645	0.461752	0.753827	0.342292	0.19563	0.909533	0.250994	0.505891	0.678924	0.999844
ENSFDAG00000002626	CHST12	-0.200741	0.0121134	0.0214144	-0.0339638	-0.00707263	-0.0446444	0.130103	0.0880477	0.0204018	0.000976636	0.0227993	0.0291709	0.0197322	0.0256418	0.498713	0.932415	0.493196	0.822031	0.966969	0.750622	0.416516	0.838154	0.999844
ENSFDAG00000002629	ENSFDAG00000002629	0.275182	0.150035	-0.043243	0.0706005	0.0238073	-0.0261875	0.0816631	0.0811375	0.0188006	0.000899987	0.0210099	0.0268815	0.0181835	0.0236294	0.334008	0.273856	0.149459	0.626206	0.884549	0.846017	0.595245	0.809444	0.999844
ENSFDAG00000002631	ADGRG6	0.295677	-0.312441	-0.0200951	-0.159985	-0.190189	0.0395451	0.308681	0.234697	0.0543824	0.00260329	0.060773	0.0777571	0.0525974	0.0683501	0.541645	0.180312	0.693693	0.516359	0.495209	0.8631	0.237721	0.789669	0.999844
ENSFDAG00000002634	CDK7	0.0274808	0.19959	-0.00696207	0.0430963	-0.268612	-0.025834	-0.134493	0.0280866	0.00650803	0.00031154	0.00727281	0.00930532	0.00629442	0.00817957	0.86975	0.0133578	0.693256	0.613316	0.00535977	0.744711	0.136994	0.808274	0.566268
ENSFDAG00000002639	RF00049	0.487548	0.311118	-0.0720877	0.67308	-0.197103	-0.540142	0.0311607	0.866205	0.200711	0.00960805	0.224297	0.286981	0.194123	0.252262	0.600383	0.487402	0.462075	0.155259	0.712924	0.220221	0.95053	0.648382	0.999844
ENSFDAG00000002640	UBAC1	0.272566	-0.447908	-0.0184231	0.119054	0.217204	-0.0585545	0.26713	0.107674	0.0249494	0.00119433	0.0278813	0.0356732	0.0241305	0.0313575	0.406174	0.00457269	0.593972	0.47585	0.250146	0.706215	0.131421	0.777212	0.999844
ENSFDAG00000002642	PPP6R3	0.18761	-0.147146	-0.0101614	-0.0752668	-0.0854709	-0.117021	0.0801734	0.042526	0.00985382	0.000471703	0.0110118	0.0140892	0.00953039	0.0123847	0.362948	0.138252	0.639884	0.473215	0.471482	0.230648	0.471264	0.776326	0.999844
ENSFDAG00000002643	JMJD8	-0.124764	-0.101745	0.00943655	-0.0218573	0.232169	0.0652632	0.219747	0.21582	0.0500083	0.0023939	0.055885	0.071503	0.0483669	0.0628526	0.788268	0.649125	0.847062	0.926333	0.38526	0.766656	0.380749	0.855734	0.999844
ENSFDAG00000002647	GNPDA1	0.347135	-0.152049	-0.0390873	0.242921	-0.0042618	0.0422106	0.0363267	0.030893	0.00560017	0.000355461	0.00728112	0.00918327	0.00546379	0.00714635	0.0482674	0.0421728	0.0381544	0.0044153	0.964528	0.567965	0.667401	0.241538	0.999844
ENSFDAG00000002649	FXYD1	-0.284366	0.299994	0.0346789	-0.653531	0.210386	-0.335644	0.102085	0.194332	0.0450293	0.00215555	0.0503208	0.0643838	0.0435513	0.0565947	0.518883	0.157442	0.4551	0.00357574	0.407024	0.10776	0.66784	0.222503	0.999844
ENSFDAG00000002650	ABCA5	-0.428179	0.0373322	0.0481957	-0.0878663	0.208322	-0.106772	0.0338082	0.135117	0.0313083	0.00149873	0.0349875	0.0447653	0.0302807	0.0393496	0.244079	0.832898	0.213156	0.638534	0.324815	0.539491	0.86467	0.812536	0.999844
ENSFDAG00000002652	RNF150	-0.153616	-0.406914	0.0393923	0.050156	0.322451	-0.129109	-0.12707	0.151378	0.0350762	0.0016791	0.0391981	0.0501527	0.0339249	0.0440853	0.692971	0.0298042	0.336385	0.800012	0.14991	0.483324	0.545047	0.837682	0.999844
ENSFDAG00000002657	ENSFDAG00000002657	-0.513425	0.370874	0.0527113	-0.141391	0.322135	-0.38909	-0.20282	0.419055	0.0971004	0.0046482	0.108511	0.138836	0.0939133	0.12204	0.427705	0.233972	0.439437	0.667759	0.38729	0.204207	0.561526	0.818187	0.999844
ENSFDAG00000002658	SMCO4	0.272972	0.187783	-0.0335603	-0.128731	0.0333951	-0.112393	-0.126866	0.0476867	0.0110496	0.000528946	0.0123481	0.015799	0.0106869	0.0138876	0.21129	0.074032	0.144505	0.246673	0.790481	0.276947	0.281686	0.714312	0.999844
ENSFDAG00000002664	PHKB	0.496587	-0.272188	-0.0450557	0.0674453	-0.0807179	-0.0849837	0.103052	0.154648	0.0358338	0.00171537	0.0400448	0.051236	0.0346577	0.0450375	0.206672	0.150469	0.276659	0.736088	0.721391	0.648034	0.62726	0.827273	0.999844
ENSFDAG00000002665	PSMB10	0.335408	0.228362	-0.0500667	0.146557	-0.140561	0.160253	-0.218626	0.178358	0.0413278	0.00197837	0.0461844	0.0590914	0.0399713	0.0519426	0.427082	0.261302	0.260322	0.495264	0.563108	0.422811	0.337425	0.784372	0.999844
ENSFDAG00000002666	SLAMF7	0.892346	-1.25522	-0.0301918	0.229946	-0.189207	-0.493524	0.0814497	0.552265	0.127967	0.00612579	0.143005	0.18297	0.123767	0.160834	0.229841	0.000449978	0.69968	0.543144	0.65825	0.160666	0.839061	0.794405	0.999844
ENSFDAG00000002683	MGST1	0.742905	-0.349821	-0.0854785	0.105264	0.0327213	0.246101	0.154908	0.134753	0.00709093	0.00169665	0.023711	0.0262927	0.0071328	0.00935234	0.0429928	3.26e-05	0.0379676	0.494224	0.840076	0.00356882	0.109195	0.784098	0.999844
ENSFDAG00000002685	GLRX2	-0.547209	0.111191	0.0505741	0.257241	0.138898	0.0732635	-0.10742	0.0643394	0.0149083	0.000713661	0.0166602	0.0213162	0.0144189	0.0187374	0.0309807	0.362473	0.0583394	0.0462652	0.341424	0.541777	0.4326	0.494271	0.999844
ENSFDAG00000002692	CPT1A	0.200597	-0.0346482	-0.0178837	-0.0491589	-0.132688	0.00681721	-0.0442417	0.0338161	0.00783563	0.000375092	0.00875642	0.0112036	0.00757844	0.00984815	0.275343	0.695487	0.3558	0.599348	0.209993	0.937582	0.655731	0.806406	0.999844
ENSFDAG00000002693	CHN1	-1.16658	0.316273	0.119324	-0.278369	0.366836	-0.0772426	0.086595	0.258365	0.0598665	0.00286581	0.0669016	0.0855984	0.0579015	0.0752427	0.021729	0.196144	0.0258158	0.281827	0.209904	0.748207	0.752238	0.727325	0.999844
ENSFDAG00000002699	RF00009	0.504196	-0.0745538	-0.068278	0.274881	-0.625869	0.407349	0.395713	0.347256	0.0804638	0.00385181	0.0899194	0.115049	0.0778228	0.10113	0.392215	0.792684	0.271271	0.359311	0.065009	0.144234	0.213374	0.743177	0.999844
ENSFDAG00000002701	RFLNB	-0.583126	-0.0046921	0.0667019	-0.0184237	0.042017	0.0865691	-0.038883	0.0650585	0.0150749	0.000721636	0.0168464	0.0215544	0.0145801	0.0189468	0.0222438	0.969516	0.0130276	0.887122	0.774731	0.473411	0.777573	0.845437	0.999844
ENSFDAG00000002708	PARVG	0.39048	-0.666534	-0.0435146	0.72217	0.705311	0.40822	-0.141188	0.627881	0.145488	0.00696453	0.162585	0.208022	0.140713	0.182856	0.622163	0.0805569	0.602073	0.0732907	0.122005	0.276486	0.741267	0.557924	0.999844
ENSFDAG00000002715	RHOJ	-0.148838	-0.444415	0.054579	-0.260672	-0.22163	-0.252235	0.0652853	0.105981	0.0245571	0.00117555	0.0274429	0.0351123	0.0237511	0.0308644	0.647533	0.00456882	0.111416	0.115593	0.236902	0.101698	0.710184	0.612137	0.999844
ENSFDAG00000002716	CUL7	0.318712	-0.315299	-0.0259319	0.114125	0.00897794	0.0301689	0.129671	0.264264	0.0612335	0.00293125	0.0684292	0.0875529	0.0592236	0.0769609	0.53527	0.202603	0.631961	0.662637	0.975794	0.90134	0.640198	0.816761	0.999844
ENSFDAG00000002717	PTPDC1	0.264376	-0.180415	-0.0302653	0.250466	0.0437663	-0.00205918	0.106519	0.132321	0.0306605	0.00146772	0.0342635	0.043839	0.0296542	0.0385354	0.467357	0.302848	0.429531	0.176021	0.834425	0.990459	0.587391	0.666752	0.999844
ENSFDAG00000002719	ENSFDAG00000002719	-0.528305	0.434432	0.0204391	0.165493	0.376684	0.662228	-0.370203	0.50466	0.116936	0.00559775	0.130678	0.167198	0.113098	0.14697	0.457071	0.203935	0.784712	0.647094	0.356937	0.0489354	0.334213	0.815058	0.999844
ENSFDAG00000002721	SCAND1	0.279289	-0.153348	-0.023329	-0.0872202	0.0532152	-0.0244921	0.0370058	0.0951705	0.0220522	0.00105564	0.0246437	0.0315307	0.0213284	0.0277162	0.365295	0.301768	0.472743	0.578482	0.764416	0.866815	0.824095	0.804024	0.999844
ENSFDAG00000002726	CSRP1	0.259185	-0.226057	-0.0172051	-0.164073	-0.150639	0.0648902	0.159175	0.189677	0.0439506	0.00210392	0.0491153	0.0628414	0.042508	0.0552389	0.551765	0.280903	0.707589	0.459096	0.547895	0.752963	0.498245	0.772161	0.999844
ENSFDAG00000002727	ING3	0.265042	-0.0280713	-0.0365684	0.204732	0.00304333	0.0573711	0.040034	0.0910551	0.0210987	0.00100999	0.023578	0.0301673	0.0204061	0.0265177	0.379759	0.846758	0.249873	0.18243	0.98602	0.687966	0.805802	0.672324	0.999844
ENSFDAG00000002730	RF00004	-0.250041	-0.642986	0.0839264	-0.804392	-0.158115	0.258035	-0.361349	0.873468	0.202394	0.00968861	0.226178	0.289387	0.195751	0.254377	0.789054	0.152938	0.393857	0.090763	0.768816	0.55975	0.473712	0.574477	0.999844
ENSFDAG00000002735	YTHDF3	-0.15648	-0.0211186	0.0259711	-0.134544	0.0154216	-0.224115	0.0837937	0.0474727	0.011	0.000526572	0.0122927	0.0157281	0.010639	0.0138253	0.472643	0.840419	0.257728	0.224938	0.902132	0.0297946	0.476065	0.702216	0.999844
ENSFDAG00000002738	TRPT1	-0.425916	-0.0778049	0.05252	-0.0239945	-0.023966	-0.0755954	0.211557	0.0922363	0.0213723	0.0010231	0.0238839	0.0305586	0.0206708	0.0268617	0.160794	0.594582	0.100595	0.876616	0.890954	0.599031	0.196771	0.843868	0.999844
ENSFDAG00000002739	CLIC1	0.236866	-0.0748894	-0.0282994	0.140332	-0.126444	0.13327	-0.001184	0.185627	0.0430122	0.002059	0.0480667	0.0614998	0.0416004	0.0540596	0.582476	0.718027	0.53285	0.522121	0.610139	0.513494	0.995937	0.789669	0.999844
ENSFDAG00000002743	PCSK4	0.509535	-0.25513	-0.0601596	0.174511	0.0703447	0.196198	0.204131	0.303352	0.0702906	0.00336482	0.0785507	0.100503	0.0679835	0.0883442	0.3549	0.335897	0.299685	0.533511	0.824398	0.451765	0.492219	0.791796	0.999844
ENSFDAG00000002748	ENSFDAG00000002748	-0.214439	0.105939	0.00591141	0.194377	0.443736	0.146932	-0.0444602	0.261401	0.0605701	0.0028995	0.0676878	0.0866044	0.058582	0.076127	0.674909	0.666864	0.912583	0.454991	0.131596	0.543809	0.871984	0.770718	0.999844
ENSFDAG00000002751	ENSFDAG00000002751	-0.0116766	-0.0599357	0.00684308	0.0879814	-0.0186836	-0.0305027	-0.109502	0.10224	0.0236904	0.00113406	0.0264743	0.033873	0.0229128	0.0297751	0.970869	0.696978	0.838975	0.588696	0.919141	0.840299	0.525694	0.804309	0.999844
ENSFDAG00000002754	S1PR3	0.0578677	0.369859	-0.0220871	-0.19797	-0.204608	0.0498762	0.0708395	0.117287	0.0271768	0.00130096	0.0303705	0.038858	0.0262848	0.034157	0.86582	0.0248611	0.540299	0.255963	0.299288	0.758357	0.701499	0.71959	0.999844
ENSFDAG00000002757	ENSFDAG00000002757	-0.834764	-0.304096	0.137977	-0.719956	0.0429724	-0.475815	-0.00574462	0.156412	0.0362428	0.00173494	0.0405018	0.0518207	0.0350532	0.0455514	0.0347973	0.110188	0.000924487	0.000347012	0.850271	0.0110406	0.978527	0.100817	0.999844
ENSFDAG00000002758	ENSFDAG00000002758	-0.300593	-2.73537	0.107533	1.3401	-0.715781	-0.144069	2.25872	2.36818	0.548738	0.0262681	0.613222	0.784597	0.530727	0.689677	0.845133	0.000221968	0.507025	0.0870246	0.419042	0.843234	0.00653193	0.572801	0.999844
ENSFDAG00000002765	PRSS35	0.359689	-0.540616	-0.00654994	-0.554182	0.109761	-0.230599	0.40926	0.189943	0.0440123	0.00210687	0.0491843	0.0629297	0.0425677	0.0553165	0.409197	0.00996833	0.886529	0.0124598	0.661717	0.263704	0.0818427	0.342036	0.999844
ENSFDAG00000002767	TARSL2	0.317416	0.305247	-0.039614	-0.228955	-0.402577	-0.0961395	0.00886665	0.148005	0.0342947	0.00164169	0.0383248	0.0490353	0.0331691	0.0431031	0.409332	0.0992901	0.328226	0.242191	0.0690637	0.597583	0.965935	0.713331	0.999844
ENSFDAG00000002768	ACTR5	0.843574	-0.300071	-0.0904917	0.213887	-0.172913	-0.0307123	-0.00889685	0.317287	0.0306752	0.00388581	0.0620794	0.0733714	0.030509	0.0400654	0.134236	0.0866597	0.146593	0.390648	0.523241	0.860426	0.964547	0.753924	0.999844
ENSFDAG00000002771	APPBP2	-0.194971	-0.134098	0.0295856	0.0726709	0.00273606	-0.113057	0.0612007	0.0406976	0.00943017	0.000451423	0.0105383	0.0134835	0.00912064	0.0118522	0.333813	0.167308	0.163778	0.479005	0.981201	0.236484	0.57401	0.778792	0.999844
ENSFDAG00000002778	NOD2	0.713744	-0.406356	-0.0785661	0.520321	0.298172	0.292063	-0.303216	0.354913	0.082238	0.00393674	0.091902	0.117586	0.0795387	0.10336	0.230891	0.156482	0.210504	0.0860959	0.384551	0.300394	0.345611	0.571698	0.999844
ENSFDAG00000002780	ENSFDAG00000002780	0.0985121	-0.183846	-0.0197312	-0.112814	-0.0580775	0.400223	0.581585	0.538043	0.124672	0.00596804	0.139322	0.178258	0.12058	0.156693	0.893164	0.60259	0.798406	0.762468	0.89059	0.249089	0.141771	0.831509	0.999844
ENSFDAG00000002781	TGFBR3	-0.20718	-0.146263	0.00536232	-0.449076	0.231039	0.719502	0.705471	0.124618	0.0288757	0.00138228	0.0322689	0.041287	0.0279279	0.0362922	0.557277	0.389386	0.885319	0.0124218	0.255518	1.67e-05	0.000212927	0.341565	0.999844
ENSFDAG00000002784	SIRT4	0.108182	-0.388313	0.00675292	-0.0679405	-0.228234	0.0241474	0.2552	0.118125	0.0273712	0.00131026	0.0305876	0.0391359	0.0264728	0.0344012	0.752942	0.0189192	0.852007	0.697669	0.248624	0.882017	0.168847	0.825094	0.999844
ENSFDAG00000002787	RBM14	0.697177	-0.169673	-0.0800918	0.14852	-0.0583047	0.184532	0.0572078	0.187603	0.04347	0.00208091	0.0485783	0.0621543	0.0420432	0.0546349	0.107481	0.415759	0.0791324	0.500406	0.815089	0.368141	0.806651	0.784754	0.999844
ENSFDAG00000002788	ENSFDAG00000002788	0.3477	-0.333169	-0.0090551	0.201986	-0.207193	-0.531889	-0.0833807	0.575335	0.133313	0.00638169	0.148979	0.190613	0.128937	0.167553	0.646666	0.36151	0.909752	0.600759	0.635096	0.138536	0.838589	0.806406	0.999844
ENSFDAG00000002789	ANGPT2	0.983395	0.0461468	-0.0931737	-0.45384	-0.507853	-0.291351	-0.0320311	0.355032	0.0822656	0.00393806	0.0919328	0.117625	0.0795654	0.103395	0.0988574	0.872179	0.137611	0.134442	0.138667	0.301655	0.92065	0.631277	0.999844
ENSFDAG00000002791	PLCG1	0.13816	-0.113742	-0.0105202	0.0505392	-0.130367	0.0757847	-0.0348102	0.104333	0.0241754	0.00115728	0.0270163	0.0345665	0.0233819	0.0303846	0.668847	0.464453	0.757135	0.758479	0.483181	0.620168	0.841715	0.831418	0.999844
ENSFDAG00000002793	ENSFDAG00000002793	0.164005	-0.107768	-0.00321806	-0.275616	-0.119121	-0.172633	0.0896882	0.18013	0.0417385	0.00199802	0.0466433	0.0596785	0.0403685	0.0524587	0.699183	0.597848	0.942607	0.201894	0.625822	0.390222	0.695365	0.68117	0.999844
ENSFDAG00000002796	PRAF2	-0.40955	-0.00342572	0.0521538	-0.134469	0.0545927	-0.0552462	-0.0262544	0.0530871	0.012301	0.000588848	0.0137465	0.0175882	0.0118972	0.0154604	0.075484	0.975359	0.0316155	0.251422	0.680599	0.612505	0.83277	0.716704	0.999844
ENSFDAG00000002801	FSCN2	-0.200059	-0.0372503	0.00468883	0.805538	-0.0209713	0.139533	0.00700709	0.267798	0.0620523	0.00297045	0.0693443	0.0887237	0.0600156	0.07799	0.699058	0.881129	0.931442	0.0022207	0.943871	0.568971	0.979982	0.187594	0.999844
ENSFDAG00000002803	ENSFDAG00000002803	-0.31595	-0.699456	0.0565746	0.481224	0.31685	-0.0605307	0.170839	0.252232	0.0584455	0.00279779	0.0653136	0.0835666	0.0565271	0.0734567	0.529285	0.00381288	0.284808	0.0597034	0.27305	0.799037	0.528475	0.526532	0.999844
ENSFDAG00000002804	MAJIN	-1.92965	0.320918	0.200021	0.757748	0.396854	-0.270977	-0.182177	0.459006	0.0927125	0.00519968	0.112617	0.143184	0.0901082	0.117581	0.00439677	0.2919	0.00553925	0.0239459	0.29428	0.366677	0.595223	0.411451	0.999844
ENSFDAG00000002807	RMDN3	0.0638557	-0.0654038	-0.00969014	0.310311	-0.179912	-0.0191964	0.0167106	0.370924	0.0859478	0.00411433	0.0960478	0.12289	0.0831267	0.108023	0.916497	0.823463	0.87992	0.316694	0.607799	0.946915	0.95945	0.738027	0.999844
ENSFDAG00000002808	ENSFDAG00000002808	0.341585	0.0329333	-0.0565986	0.166865	0.131032	0.346677	0.0467972	0.187342	0.0434096	0.00207802	0.0485108	0.062068	0.0419848	0.054559	0.430001	0.874404	0.214385	0.448683	0.598923	0.090662	0.841208	0.770029	0.999844
ENSFDAG00000002810	HASPIN	0.971324	-0.347311	-0.107451	-0.0733637	0.245481	0.169655	0.286668	0.177769	0.0411914	0.00197183	0.0460319	0.0588962	0.0398393	0.051771	0.0212365	0.0870334	0.0155298	0.732395	0.311768	0.395334	0.207706	0.826388	0.999844
ENSFDAG00000002823	ENSFDAG00000002823	0.628362	-0.565438	-0.0509865	0.134135	-0.0242193	0.130049	0.0917495	0.160153	0.0371096	0.00177644	0.0414704	0.0530601	0.0358915	0.0466409	0.11638	0.00333301	0.226391	0.510102	0.916263	0.492429	0.670957	0.788268	0.999844
ENSFDAG00000002827	ERH	0.179791	0.090787	-0.0251564	-0.0536577	-0.0050918	0.0753438	-0.0601977	0.0540181	0.0125167	0.000599175	0.0139876	0.0178966	0.0121059	0.0157315	0.439187	0.417089	0.304085	0.65005	0.969639	0.493484	0.631264	0.815058	0.999844
ENSFDAG00000002829	EIF4E2	0.0646281	0.100548	-0.0111769	-0.0430998	-0.0458752	0.0603059	-0.0713281	0.0172084	0.00398741	0.000190878	0.00445598	0.00570128	0.00385653	0.00501155	0.62225	0.111313	0.418522	0.5185	0.543477	0.331501	0.313662	0.789669	0.999844
ENSFDAG00000002831	ENSFDAG00000002831	0.499805	-0.0619064	-0.0482914	-0.126618	0.019457	-0.086236	-0.0545994	0.109845	0.0254525	0.00121841	0.0284435	0.0363925	0.0246171	0.0319898	0.131546	0.697991	0.166519	0.452796	0.918762	0.582573	0.760162	0.770408	0.999844
ENSFDAG00000002835	CYHR1	-0.161283	0.010318	0.0146014	0.125167	0.0775562	0.0057996	-0.0268345	0.0993109	0.0230116	0.00110157	0.0257158	0.0329025	0.0222563	0.028922	0.6088	0.945771	0.659983	0.435077	0.668968	0.96899	0.874622	0.767909	0.999844
ENSFDAG00000002837	ICE1	0.25058	-0.112512	-0.0285999	0.0369176	0.133493	0.157564	-0.0760533	0.171511	0.0397413	0.00190242	0.0444115	0.056823	0.0384369	0.0499486	0.545137	0.572489	0.512011	0.860938	0.575472	0.421583	0.733634	0.841722	0.999844
ENSFDAG00000002842	ARFRP1	0.332813	-0.116023	-0.0321252	-0.0438852	0.195297	-0.00781262	-0.0837407	0.0426424	0.0098808	0.000472995	0.0110419	0.0141278	0.00955649	0.0124186	0.107031	0.243126	0.139642	0.676215	0.100366	0.936302	0.452382	0.821157	0.999844
ENSFDAG00000002848	CIRBP	0.827782	-0.114855	-0.0946934	-0.136414	-0.143966	0.167757	0.0812576	0.0991486	0.0121516	0.00119242	0.0206078	0.0250018	0.0120084	0.015766	0.00856632	0.29745	0.00610227	0.34198	0.362567	0.125801	0.517537	0.742729	0.999844
ENSFDAG00000002854	GUCY1A1	1.21749	-0.986109	-0.0843206	-0.0428089	-0.614371	-0.200256	-0.00339318	0.20017	0.0273775	0.00238235	0.0429565	0.0527318	0.0269646	0.0353842	0.00650387	2.53e-09	0.0840691	0.836363	0.00746322	0.222647	0.985608	0.838364	0.618764
ENSFDAG00000002857	OSBPL6	-0.279232	-0.249892	0.0473855	-0.0821708	0.113612	-0.151598	0.0607126	0.0872734	0.0202224	0.000968047	0.0225988	0.0289144	0.0195586	0.0254164	0.344556	0.0788731	0.127761	0.584649	0.504043	0.27837	0.703335	0.804309	0.999844
ENSFDAG00000002858	ANXA2	0.0265684	-0.306381	0.0186819	-0.285623	0.0501634	-0.103457	0.120795	0.0427709	0.00991058	0.00047442	0.0110752	0.0141704	0.00958529	0.012456	0.89778	0.00208677	0.391053	0.00664673	0.673462	0.290642	0.279105	0.28221	0.999844
ENSFDAG00000002862	ENSFDAG00000002862	0.393128	-0.027681	-0.0381786	-0.0323497	0.0612757	-0.194338	-0.100916	0.0719286	0.0166668	0.000797841	0.0186254	0.0238305	0.0161197	0.0209475	0.142695	0.830223	0.17649	0.812627	0.691414	0.125854	0.48564	0.838154	0.999844
ENSFDAG00000002867	ENSFDAG00000002867	-0.13378	0.0745836	0.024548	-0.283398	-0.0127847	-0.231746	-0.0261602	0.0554039	0.0128378	0.000614547	0.0143464	0.0183558	0.0124164	0.0161351	0.569794	0.51037	0.32206	0.0179787	0.92482	0.0375475	0.836833	0.381581	0.999844
ENSFDAG00000002870	ARRDC4	0.0656332	-0.357911	-0.00577731	0.517518	0.225341	0.0206255	0.0742112	0.247367	0.0573181	0.00274382	0.0640537	0.0819545	0.0554367	0.0720397	0.895013	0.134925	0.912177	0.0408734	0.431197	0.930194	0.78217	0.479203	0.999844
ENSFDAG00000002872	MST1	0.379878	-0.726265	-0.0505006	1.17862	0.962655	0.250608	-0.0698779	0.800646	0.18552	0.00888087	0.207321	0.265261	0.179431	0.23317	0.671169	0.0917646	0.592041	0.00963897	0.0616079	0.554101	0.884938	0.316158	0.999844
ENSFDAG00000002881	ENSFDAG00000002881	0.124581	-0.0809143	-0.00162346	-0.1496	-0.060557	-0.185905	-0.0186078	0.0202419	0.00222252	0.000245669	0.00408504	0.00489663	0.0022032	0.00289327	0.381225	0.0861005	0.917504	0.0192507	0.386821	7.48e-05	0.729388	0.386197	0.999844
ENSFDAG00000002882	CKS1B	0.0895876	0.146305	-0.0170945	-0.0604982	-0.0248347	0.0827358	-0.0550039	0.0517882	0.012	0.000574441	0.0134102	0.0171578	0.0116061	0.0150821	0.693824	0.181689	0.475699	0.601373	0.849626	0.442499	0.654239	0.806406	0.999844
ENSFDAG00000002885	RRAGD	0.238356	-0.89829	-0.0341272	1.46588	0.794637	-0.48921	1.0176	0.735107	0.170334	0.0081539	0.19035	0.243547	0.164743	0.214083	0.781009	0.0295151	0.705479	0.000779781	0.107356	0.228091	0.0278557	0.129145	0.999844
ENSFDAG00000002888	CGNL1	-0.597075	0.877162	0.015896	-0.0436176	0.132277	0.455547	-0.245449	0.393958	0.0912853	0.00436983	0.102012	0.130522	0.088289	0.114731	0.341468	0.00369351	0.809968	0.891376	0.714262	0.125243	0.468675	0.846142	0.999844
ENSFDAG00000002889	KIAA0355	0.732727	-0.419063	-0.0524584	-0.211446	-0.141666	-0.000202031	-0.220333	0.290675	0.0673532	0.0032242	0.0752681	0.096303	0.0651425	0.0846523	0.174128	0.106369	0.355562	0.440876	0.648028	0.999368	0.448879	0.768006	0.999844
ENSFDAG00000002894	SMAD2	-0.256914	0.0623447	0.024987	0.0508991	-0.0588873	-0.0126565	0.0562311	0.0513503	0.0118985	0.000569584	0.0132968	0.0170128	0.011508	0.0149546	0.2569	0.567628	0.295113	0.65892	0.651647	0.906082	0.645644	0.816736	0.999844
ENSFDAG00000002897	WDFY3	0.503795	-0.143011	-0.0615603	0.166895	0.12917	0.112297	0.0777692	0.14505	0.0336099	0.00160891	0.0375595	0.0480561	0.0325067	0.0422423	0.1859	0.435348	0.124847	0.389151	0.555704	0.533383	0.705145	0.752439	0.999844
ENSFDAG00000002899	EMC7	-0.335846	0.220778	0.0346307	0.00844802	-0.236744	-0.127538	-0.0252826	0.199147	0.0461449	0.00220896	0.0515676	0.065979	0.0446303	0.0579969	0.451701	0.304061	0.461226	0.970324	0.3567	0.54604	0.916389	0.860841	0.999844
ENSFDAG00000002901	ZFX	0.115477	0.0876135	-0.00861264	-0.244831	0.0220456	-0.190181	0.00300014	0.100475	0.0232815	0.00111449	0.0260173	0.0332883	0.0225173	0.0292611	0.715629	0.56583	0.796416	0.129047	0.903826	0.205017	0.986007	0.62706	0.999844
ENSFDAG00000002908	GINS2	0.531592	-0.137828	-0.0583216	-0.0368972	0.0193424	0.084269	0.118568	0.0682919	0.0158241	0.000757502	0.0176837	0.0226257	0.0153047	0.0198884	0.0419314	0.273227	0.0340876	0.781424	0.897682	0.495764	0.400488	0.833458	0.999844
ENSFDAG00000002914	ZXDC	0.489322	-0.504573	-0.0217338	-0.138217	0.0747278	-0.222205	-0.0960475	0.210784	0.0488413	0.00233804	0.0545808	0.0698343	0.0472382	0.0613858	0.286514	0.0224227	0.653085	0.554106	0.777346	0.306606	0.698267	0.796892	0.999844
ENSFDAG00000002916	HERC4	0.16624	-0.0161477	-0.0104649	-0.0411529	-0.181072	-0.197533	-0.00999575	0.110291	0.025556	0.00122337	0.0285591	0.0365404	0.0247171	0.0321198	0.616674	0.919543	0.764791	0.807605	0.343511	0.208958	0.955522	0.838154	0.999844
ENSFDAG00000002917	ENSFDAG00000002917	0.664622	-0.193285	-0.0709494	-0.0343973	-0.167448	0.171374	0.113556	0.332733	0.0770985	0.00369071	0.0861586	0.110237	0.0745679	0.0969007	0.24924	0.486362	0.24286	0.906713	0.614028	0.530279	0.715266	0.851192	0.999844
ENSFDAG00000002921	ME2	-0.373775	0.000517245	0.0384592	0.0656257	0.144432	-0.00288951	0.0722085	0.0656486	0.0152116	0.000728182	0.0169992	0.0217499	0.0147123	0.0191186	0.144618	0.996654	0.154095	0.614727	0.327412	0.980994	0.601512	0.808274	0.999844
ENSFDAG00000002924	GCDH	0.251002	-0.129493	-0.0235345	0.168982	-0.0826605	0.0386414	-0.120923	0.0913869	0.0211755	0.00101367	0.0236639	0.0302772	0.0204805	0.0266143	0.406369	0.373534	0.459791	0.271989	0.634751	0.787151	0.458555	0.724936	0.999844
ENSFDAG00000002926	CEBPZ	-0.179404	0.127253	0.0170981	-0.0645988	0.0420367	-0.0740996	-0.0063397	0.0397022	0.00919951	0.000440381	0.0102806	0.0131536	0.00889755	0.0115623	0.36792	0.184596	0.415204	0.524052	0.713972	0.432124	0.952985	0.790004	0.999844
ENSFDAG00000002928	MRPS22	0.00508176	0.0860421	-0.00213727	-0.0448517	0.00138646	-0.0410897	-0.0460242	0.025451	0.00589734	0.000282306	0.00659035	0.00843214	0.00570377	0.00741202	0.974589	0.262532	0.898779	0.580613	0.987953	0.586396	0.592936	0.804309	0.999844
ENSFDAG00000002930	SCUBE2	-0.779351	-0.495247	0.146924	-0.0961982	-0.621251	-0.402427	-0.434596	0.311492	0.0721767	0.0034551	0.0806584	0.1032	0.0698076	0.0907147	0.162594	0.0652685	0.0124348	0.73482	0.053129	0.127727	0.149039	0.82727	0.999844
ENSFDAG00000002932	STK33	-0.391181	0.334643	0.039982	-0.182654	-0.155986	-0.231345	0.0207141	0.185381	0.0429552	0.00205627	0.0480029	0.0614182	0.0415452	0.0539878	0.363591	0.10639	0.377935	0.404466	0.529077	0.256371	0.928963	0.758713	0.999844
ENSFDAG00000002933	CCT5	0.0518421	-0.180454	0.00364473	-0.168541	0.090294	-0.032922	0.149065	0.025555	0.00592143	0.000283459	0.00661727	0.00846658	0.00572707	0.0074423	0.745712	0.0190242	0.828613	0.0382762	0.326441	0.66354	0.0840027	0.471906	0.999844
ENSFDAG00000002934	RABGAP1L	-0.0912241	0.0905985	0.00521251	-0.0221568	-0.143094	0.118756	-0.0283085	0.100141	0.023204	0.00111078	0.0259308	0.0331776	0.0224424	0.0291638	0.773138	0.552006	0.875719	0.890562	0.432104	0.427939	0.868341	0.846142	0.999844
ENSFDAG00000002942	EXOSC10	0.305347	-0.114244	-0.0324135	-0.013651	-0.0665793	0.00173405	0.18315	0.0560786	0.0129941	0.000622031	0.0145211	0.0185793	0.0125676	0.0163316	0.197252	0.316242	0.193728	0.909807	0.625228	0.987659	0.151814	0.852011	0.999844
ENSFDAG00000002952	ENSFDAG00000002952	-0.0311225	0.18496	-0.00491267	-0.0869498	0.0293312	0.0496277	-0.0381828	0.0538669	0.0124817	0.000597498	0.0139484	0.0178465	0.012072	0.0156875	0.893327	0.0978134	0.840716	0.461598	0.826214	0.651496	0.760478	0.772568	0.999844
ENSFDAG00000002954	PIGQ	0.550078	-0.071802	-0.0700361	-0.0114192	0.122071	0.131366	0.245546	0.302231	0.0700308	0.00335238	0.0782603	0.100132	0.0677322	0.0880177	0.317026	0.78614	0.226429	0.96744	0.699668	0.613727	0.407868	0.860841	0.999844
ENSFDAG00000002959	RF00026	0.0896171	-1.16167	0.0361	-0.666608	0.292126	0.224192	0.923633	0.472059	0.109382	0.00523613	0.122236	0.156397	0.105792	0.137476	0.896223	0.000444003	0.617859	0.056566	0.460102	0.490648	0.0127359	0.519647	0.999844
ENSFDAG00000002961	DOCK1	-0.0825449	-0.14484	0.0213623	-0.27042	0.0425295	-0.0963595	0.169354	0.073065	0.0169301	0.000810446	0.0189196	0.024207	0.0163744	0.0212785	0.760079	0.265638	0.453021	0.0492993	0.784584	0.451433	0.245649	0.498478	0.999844
ENSFDAG00000002964	ENSFDAG00000002964	0.00623628	-0.0502789	-0.00531775	0.131943	-0.133357	0.202028	0.0654484	0.0993026	0.0230097	0.00110148	0.0257136	0.0328997	0.0222544	0.0289195	0.984211	0.740297	0.872701	0.410611	0.462201	0.175651	0.700341	0.7602	0.999844
ENSFDAG00000002972	CLUAP1	-0.27816	0.337436	0.0166375	0.0771937	-0.0134366	-0.0152008	-0.13394	0.0319163	0.00739542	0.000354019	0.00826447	0.0105741	0.00715268	0.00929487	0.119471	8.72e-05	0.376563	0.395809	0.896038	0.857361	0.164748	0.755736	0.999844
ENSFDAG00000002974	ZGPAT	0.714049	-0.15504	-0.0867459	0.266599	-0.174276	0.278674	0.0889835	0.313436	0.0726272	0.00347667	0.0811619	0.103844	0.0702434	0.091281	0.20216	0.565088	0.141241	0.349377	0.588637	0.293047	0.768358	0.742925	0.999844
ENSFDAG00000002979	ERLEC1	-0.358082	0.14226	0.042713	-0.160287	-0.101991	-0.0394635	-0.108144	0.0338503	0.00784356	0.000375472	0.00876528	0.0112149	0.00758611	0.00985812	0.0516237	0.108208	0.0275029	0.086888	0.335505	0.650483	0.276069	0.572801	0.999844
ENSFDAG00000002982	RF00151	-0.136188	0.141551	0.00759486	-0.109146	-0.0185438	0.0748088	0.101084	0.0640565	0.0148427	0.000710522	0.0165869	0.0212224	0.0143555	0.018655	0.590512	0.245288	0.775701	0.396733	0.898709	0.532384	0.459247	0.755736	0.999844
ENSFDAG00000002984	UACA	-0.350605	0.424953	0.0286819	-0.243932	0.0309385	-0.145195	-0.0727822	0.072872	0.0168854	0.000808305	0.0188696	0.0241431	0.0163312	0.0212223	0.194018	0.00107439	0.313054	0.0757711	0.842173	0.255887	0.617351	0.562654	0.999844
ENSFDAG00000002986	SMC6	-0.126651	0.0165775	0.0155192	-0.0376568	-0.00166199	-0.0823191	0.0630631	0.0439927	0.0101937	0.000487973	0.0113916	0.0145751	0.0098591	0.0128119	0.545954	0.869579	0.482343	0.724225	0.989016	0.407075	0.577428	0.826038	0.999844
ENSFDAG00000002990	FAM171A1	-0.461081	0.127616	0.0519294	-0.263539	0.134271	-0.120314	0.0658628	0.129136	0.0299225	0.00143239	0.0334388	0.0427838	0.0289404	0.0376079	0.199464	0.460669	0.170036	0.149532	0.516245	0.479418	0.734138	0.64482	0.999844
ENSFDAG00000002994	RF00151	-0.83532	-0.017631	0.0696477	0.183385	0.816048	0.663845	-0.154949	0.617687	0.143126	0.00685146	0.159945	0.204645	0.138428	0.179887	0.287853	0.962829	0.40011	0.646563	0.0712449	0.0743841	0.714862	0.815058	0.999844
ENSFDAG00000003003	RF00151	-0.473501	-0.228158	0.0617958	0.148598	0.423662	-0.272947	0.108322	0.596891	0.138307	0.00662079	0.15456	0.197755	0.133768	0.173831	0.539958	0.539548	0.447578	0.705448	0.340742	0.455498	0.795012	0.825346	0.999844
ENSFDAG00000003004	TMEM258	0.0325073	0.0487565	-0.000176854	-0.149769	0.0470493	-0.0278598	-0.120229	0.109188	0.0253003	0.00121113	0.0282735	0.036175	0.0244699	0.0317985	0.921633	0.759203	0.995945	0.373091	0.804621	0.858645	0.500168	0.74761	0.999844
ENSFDAG00000003009	ANKH	-0.49211	0.31934	0.0396701	-0.581758	0.746251	0.0833377	0.0445331	0.221363	0.0512928	0.00245539	0.0573203	0.0733395	0.0496092	0.0644669	0.295586	0.158534	0.423376	0.0151031	0.00585846	0.708283	0.86077	0.366315	0.567815
ENSFDAG00000003013	XRCC4	-0.578488	0.147923	0.0624193	-0.00208127	-0.187303	0.0556045	-0.154311	0.118529	0.0114993	0.0014513	0.0232097	0.027442	0.011436	0.0150181	0.0929028	0.16776	0.101322	0.9891	0.258193	0.603089	0.207966	0.861287	0.999844
ENSFDAG00000003014	ENSFDAG00000003014	-0.357381	0.304276	0.0267201	0.242411	-0.584572	0.155095	-0.0599441	0.219908	0.0509555	0.00243924	0.0569434	0.0728572	0.0492829	0.064043	0.446001	0.177675	0.588496	0.3097	0.0303327	0.484781	0.812757	0.737181	0.922231
ENSFDAG00000003022	PLD2	0.143504	-0.235867	-0.0130495	0.184572	-0.152312	0.09091	0.202308	0.20784	0.0481592	0.00230538	0.0538185	0.068859	0.0465785	0.0605285	0.752933	0.282465	0.78579	0.426259	0.561621	0.673587	0.410903	0.76606	0.999844
ENSFDAG00000003028	CFAP300	-0.733182	-0.0116762	0.110314	-0.523917	0.333205	-0.632624	-0.0759025	0.53974	0.125065	0.00598686	0.139761	0.17882	0.12096	0.157187	0.318292	0.973661	0.153953	0.161088	0.430721	0.0689163	0.848175	0.651488	0.999844
ENSFDAG00000003030	PLA2G4A	-0.0593743	0.382053	-0.000696721	-0.409306	0.0634386	-0.231106	0.0806744	0.122881	0.0284731	0.00136301	0.031819	0.0407114	0.0275385	0.0357862	0.865499	0.0235646	0.984944	0.0217567	0.75321	0.163727	0.669773	0.40313	0.999844
ENSFDAG00000003031	RF00055	0.662624	-0.228036	-0.0712449	-0.0313582	0.0735152	-0.131373	0.372326	0.433638	0.100479	0.00480996	0.112287	0.143668	0.0971814	0.126287	0.314298	0.471901	0.304295	0.925442	0.846212	0.673448	0.294768	0.855337	0.999844
ENSFDAG00000003033	COTL1	0.889833	-0.860131	-0.0774122	0.5596	-0.0253032	0.186495	0.0937073	0.287956	0.060263	0.00324457	0.0716192	0.0912534	0.0584962	0.0762593	0.0972704	0.000458672	0.174136	0.0365241	0.933245	0.440655	0.734358	0.470239	0.999844
ENSFDAG00000003034	ENSFDAG00000003034	0.0748103	-0.622526	-0.0612564	2.22834	2.23507	0.702761	0.600966	1.53739	0.129168	0.0189871	0.291791	0.339572	0.128887	0.169224	0.951889	0.0832512	0.656644	3.7e-05	0.000125291	0.0502878	0.144045	0.0615275	0.329545
ENSFDAG00000003035	C16orf87	-0.337131	0.241309	0.0260014	0.108176	-0.106407	0.0404263	-0.0498624	0.0476286	0.0110362	0.000528302	0.0123331	0.0157797	0.0106739	0.0138707	0.122401	0.0216175	0.257953	0.330015	0.396953	0.695581	0.672022	0.740759	0.999844
ENSFDAG00000003036	PI4KA	0.509633	-0.442412	-0.0469538	0.200829	-0.0313255	0.111982	0.204548	0.266635	0.0617829	0.00295755	0.0690431	0.0883384	0.059755	0.0776513	0.323663	0.0750941	0.387925	0.444685	0.916062	0.64688	0.462924	0.769216	0.999844
ENSFDAG00000003040	TP53I13	0.53406	-0.256883	-0.0550225	0.0352679	0.100059	0.119687	0.0423923	0.300643	0.0696628	0.00333476	0.0778491	0.0996053	0.0673763	0.0875551	0.33005	0.330418	0.340684	0.899414	0.751212	0.644727	0.886079	0.84946	0.999844
ENSFDAG00000003042	LDB3	-1.35005	-0.111064	0.175492	-0.344299	-0.132125	-0.264094	0.108989	0.523127	0.121215	0.00580259	0.13546	0.173316	0.117237	0.152349	0.0619599	0.749725	0.0212334	0.349546	0.750964	0.440526	0.780068	0.742925	0.999844
ENSFDAG00000003043	PET100	0.200754	0.119649	-0.0223991	-0.00496639	-0.0547703	0.00920431	-0.251307	0.166266	0.038526	0.00184424	0.0430533	0.0550853	0.0372615	0.0484211	0.622482	0.54214	0.601962	0.980904	0.815482	0.961969	0.253431	0.861287	0.999844
ENSFDAG00000003044	PRR5L	0.780919	-0.396694	-0.0707005	-0.067184	-0.137095	0.164922	0.0135739	0.20462	0.0474132	0.00226968	0.0529849	0.0677924	0.045857	0.0595909	0.0842825	0.0684818	0.137803	0.770386	0.598513	0.441211	0.955657	0.832563	0.999844
ENSFDAG00000003047	ENSFDAG00000003047	0.315352	-0.315891	-0.0259102	-0.0845688	0.0667544	0.0561582	0.225924	0.185468	0.0429753	0.00205723	0.0480255	0.061447	0.0415648	0.0540132	0.464014	0.127559	0.567827	0.699571	0.787702	0.782967	0.330999	0.82511	0.999844
ENSFDAG00000003049	TMEM65	-0.278963	-0.34362	0.0452746	0.100997	0.109804	-0.149587	0.24869	0.0713409	0.0165306	0.000791322	0.0184732	0.0236358	0.015988	0.0207764	0.296289	0.00752652	0.107518	0.457431	0.475092	0.236795	0.0844676	0.771083	0.999844
ENSFDAG00000003052	N4BP2L1	-0.40639	0.0581145	0.0376582	-0.0753634	0.236727	0.181837	-0.0325077	0.356542	0.0826154	0.0039548	0.0923237	0.118125	0.0799037	0.103834	0.496129	0.83977	0.549292	0.804111	0.490967	0.520043	0.919644	0.838154	0.999844
ENSFDAG00000003053	RNF213	0.24822	-0.419812	-0.017888	0.0417846	0.202172	0.162019	0.129461	0.106601	0.0247008	0.00118243	0.0276035	0.0353177	0.0238901	0.031045	0.447105	0.007559	0.602921	0.801429	0.282024	0.294532	0.462488	0.837953	0.999844
ENSFDAG00000003055	CENPW	0.558129	-0.200955	-0.0548262	-0.16162	0.245594	2.16e-05	0.0404684	0.103799	0.0240517	0.00115136	0.0268781	0.0343896	0.0232622	0.0302292	0.0832104	0.195057	0.106141	0.324223	0.185386	0.999887	0.81595	0.739668	0.999844
ENSFDAG00000003058	NF2	0.623287	-0.122634	-0.0712439	0.13629	-0.0451059	0.0824496	0.0533283	0.158726	0.0367789	0.00176061	0.0411009	0.0525873	0.0355717	0.0462253	0.11771	0.522526	0.0895238	0.501417	0.844066	0.661999	0.804105	0.78502	0.999844
ENSFDAG00000003061	ST3GAL5	-0.958995	0.28554	0.111422	-0.235118	0.380139	-0.3731	-0.141932	0.174405	0.0210407	0.00210041	0.0360911	0.0437116	0.0208025	0.0273132	0.0216561	0.0490097	0.0150488	0.215859	0.0690322	0.00968636	0.390447	0.69428	0.999844
ENSFDAG00000003064	CD180	0.102176	-0.172299	-0.0216331	1.15165	0.410964	-0.0190498	-0.41328	0.667357	0.111376	0.0077636	0.152762	0.191277	0.108977	0.142726	0.900464	0.605658	0.806054	0.00321338	0.347389	0.953983	0.273981	0.216657	0.999844
ENSFDAG00000003068	NEDD4	0.0562897	0.10647	-0.00817501	-0.0883762	-0.134297	0.101567	-0.11709	0.0298176	0.00690913	0.00033074	0.00772104	0.00987882	0.00668235	0.00868368	0.744439	0.200228	0.65306	0.314528	0.176637	0.214059	0.208928	0.737534	0.999844
ENSFDAG00000003070	RPUSD2	0.222451	-0.116448	-0.0209479	0.0193135	0.0400069	-0.0242833	0.0309501	0.0456805	0.0105848	0.000506693	0.0118286	0.0151343	0.0102373	0.0133034	0.297966	0.257696	0.352055	0.859053	0.745028	0.810329	0.788439	0.841482	0.999844
ENSFDAG00000003071	RF01985	1.22348	-0.453036	-0.107944	0.52049	0.797522	-0.700714	-0.841276	0.586507	0.135901	0.00650561	0.151871	0.194314	0.131441	0.170806	0.110139	0.219105	0.180797	0.181682	0.0704175	0.053267	0.0417935	0.672252	0.999844
ENSFDAG00000003077	IGF2R	-0.215055	-0.0803279	0.0269441	0.284421	0.0304792	-0.0744761	-0.120686	0.0755328	0.0175019	0.000837818	0.0195586	0.0250246	0.0169275	0.0219972	0.433923	0.543726	0.351922	0.0419788	0.847215	0.567032	0.415808	0.48333	0.999844
ENSFDAG00000003079	C15orf40	-0.0380056	-0.0350945	0.0048617	-0.0556807	0.103607	0.103687	-0.0211918	0.0882781	0.0204552	0.000979191	0.0228589	0.0292472	0.0197838	0.0257089	0.898216	0.806163	0.876533	0.712665	0.544631	0.461016	0.894852	0.826038	0.999844
ENSFDAG00000003088	ENSFDAG00000003088	-0.333299	0.22945	0.0313273	-0.108916	-0.0258885	-0.0381564	-0.0271116	0.039823	0.00922751	0.000441721	0.0103119	0.0131937	0.00892463	0.0115975	0.0948807	0.0169119	0.136078	0.283467	0.82168	0.686288	0.801233	0.727737	0.999844
ENSFDAG00000003093	PSMD5	-0.231113	0.0259801	0.0313086	-0.218549	-2.34e-05	-0.0784821	0.0595649	0.0468566	0.0108573	0.000519739	0.0121332	0.015524	0.0105009	0.0136459	0.285666	0.803103	0.169654	0.0472456	0.99985	0.443752	0.610118	0.496599	0.999928
ENSFDAG00000003094	ALKAL1	-2.37412	0.730409	0.24263	-0.657377	-1.37744	0.352768	0.848258	0.88874	0.10248	0.0107444	0.18167	0.218942	0.101451	0.133217	0.0117907	0.0225105	0.0192452	0.122997	0.00324218	0.268058	0.0201222	0.622184	0.500531
ENSFDAG00000003096	STX3	-0.0991838	-0.0696552	-0.00758987	0.668496	0.516381	0.186794	0.0678113	0.202903	0.0251354	0.00243791	0.0423	0.0513791	0.0248315	0.0326004	0.825724	0.660408	0.877832	0.00115268	0.0227193	0.235864	0.707237	0.149406	0.870493
ENSFDAG00000003097	GPR65	-0.272318	-0.193342	-0.00695655	1.69303	1.12222	0.125514	0.639358	1.05345	0.141099	0.0125642	0.224652	0.275166	0.139062	0.182507	0.790763	0.606754	0.950513	0.000354287	0.0324085	0.736433	0.134498	0.101528	0.924253
ENSFDAG00000003098	TRIT1	0.0909274	0.0402708	-0.0111432	0.00651686	-0.195407	-0.0379803	0.108504	0.0314961	0.00729807	0.000349359	0.00815568	0.0104349	0.00705852	0.00917252	0.608407	0.637358	0.551059	0.942473	0.0557587	0.651222	0.257246	0.858465	0.999844
ENSFDAG00000003106	ENSFDAG00000003106	0.0492824	-0.178125	-0.0135501	0.654437	0.310793	-0.0090233	-0.057245	0.219152	0.0159193	0.00272623	0.0404624	0.0463543	0.0159315	0.0209101	0.916159	0.158018	0.795238	0.0011402	0.148871	0.943009	0.692196	0.149406	0.999844
ENSFDAG00000003107	SSR3	-0.293226	0.107914	0.0246987	-0.159719	0.0659363	0.127625	0.169922	0.0547125	0.0126776	0.000606878	0.0141674	0.0181267	0.0122615	0.0159337	0.209988	0.337849	0.316059	0.179638	0.624318	0.249089	0.178258	0.670133	0.999844
ENSFDAG00000003109	ENSFDAG00000003109	0.202073	-0.0560783	-0.0213206	0.0299053	-0.0859016	-0.0529924	0.111859	0.0482159	0.0111723	0.000534817	0.0124851	0.0159743	0.0108056	0.0140418	0.357434	0.595733	0.356566	0.788976	0.496721	0.610199	0.345182	0.834987	0.999844
ENSFDAG00000003120	RF01977	-0.681846	1.10651	0.0177256	-0.0314764	0.143671	0.154949	-0.101143	0.233651	0.0541401	0.00259169	0.0605022	0.0774106	0.052363	0.0680455	0.158364	1.98e-06	0.727702	0.898175	0.605589	0.49832	0.698211	0.849013	0.999844
ENSFDAG00000003123	APBA3	0.647289	-0.197634	-0.0888287	0.198299	0.295125	0.357838	0.261364	0.385971	0.0894346	0.00428124	0.0999443	0.127875	0.0864991	0.112405	0.297464	0.508702	0.174594	0.530494	0.409201	0.223721	0.435647	0.791153	0.999844
ENSFDAG00000003127	CCNA2	0.707302	-0.158252	-0.0794198	-0.0276733	0.105776	-0.0564289	0.199913	0.24024	0.0217929	0.002954	0.0463382	0.0543824	0.021708	0.0285056	0.149005	0.283723	0.143948	0.897709	0.650128	0.701724	0.236387	0.848766	0.999844
ENSFDAG00000003130	IPO8	0.062913	-0.162404	0.000560662	0.105685	0.0310457	-0.188716	0.082985	0.0314186	0.0072801	0.000348499	0.00813561	0.0104092	0.00704115	0.00914994	0.72264	0.0569896	0.976041	0.241314	0.760905	0.0245133	0.385645	0.713101	0.999844
ENSFDAG00000003132	RF02138	-0.233038	-1.25719	0.0686335	0.437837	-0.185654	0.307499	0.50288	0.800755	0.185545	0.00888206	0.207349	0.265296	0.179455	0.233201	0.794539	0.00351608	0.466462	0.336288	0.718515	0.467911	0.297711	0.742729	0.999844
ENSFDAG00000003133	ENSFDAG00000003133	0.0355341	-0.0434222	0.00305891	-0.13311	-0.101123	-0.0172967	0.0206985	0.0272321	0.00631003	0.000302062	0.00705154	0.00902222	0.00610292	0.00793072	0.82951	0.584631	0.860292	0.112934	0.287048	0.824775	0.816208	0.608458	0.999844
ENSFDAG00000003138	ENSFDAG00000003138	-0.230876	0.201368	0.0121627	-0.0251727	0.182582	0.108065	-0.0263007	0.0701474	0.0162541	0.000778083	0.0181641	0.0232404	0.0157205	0.0204288	0.383365	0.114231	0.662815	0.851836	0.231047	0.388748	0.854004	0.839917	0.999844
ENSFDAG00000003143	ENSFDAG00000003143	0.613189	0.355469	-0.076394	-0.346132	-0.0845314	0.438276	-0.70068	0.42878	0.099354	0.00475608	0.111029	0.142058	0.0960929	0.124872	0.34905	0.25943	0.267978	0.298908	0.822542	0.157407	0.0473857	0.732806	0.999844
ENSFDAG00000003147	DHRSX	0.569517	-0.273622	-0.0565961	0.174148	0.139668	0.0876878	-0.142634	0.229596	0.0532004	0.00254671	0.0594522	0.0760671	0.0514542	0.0668645	0.234609	0.235505	0.262077	0.475088	0.612572	0.699074	0.581223	0.777212	0.999844
ENSFDAG00000003156	RF00280	0.214754	-0.175069	-0.00197169	-0.0597807	1.11427	-0.533236	-0.751401	0.465423	0.107844	0.00516252	0.120518	0.154198	0.104305	0.135543	0.752923	0.593963	0.978108	0.863279	0.00454563	0.0987227	0.0412559	0.842449	0.547734
ENSFDAG00000003157	ENSFDAG00000003157	0.293923	-0.103586	-0.0358047	0.162334	0.0333784	0.0357982	0.0906154	0.0710124	0.0164545	0.000787678	0.0183881	0.023527	0.0159144	0.0206807	0.270037	0.41936	0.202043	0.231256	0.827732	0.776587	0.52862	0.707878	0.999844
ENSFDAG00000003159	PDGFRL	-0.353117	0.0429607	0.0441587	-0.278306	0.00869851	0.00653606	0.0129811	0.032139	0.00678446	0.000361652	0.00802037	0.010224	0.00658352	0.00858062	0.0488715	0.601969	0.0202306	0.0018861	0.931445	0.935797	0.888552	0.176931	0.999844
ENSFDAG00000003160	ENSFDAG00000003160	-0.0168274	0.225578	-0.00778758	-0.0708812	0.00274703	0.0575702	-0.0957477	0.0367596	0.00851768	0.000407742	0.00951862	0.0121788	0.00823811	0.0107054	0.930062	0.0145175	0.699745	0.467524	0.980141	0.525895	0.35476	0.775332	0.999844
ENSFDAG00000003162	RF00157	0.49766	0.25952	-0.0602743	-0.333694	0.860194	0.650705	-1.56814	0.633097	0.146697	0.00702238	0.163935	0.20975	0.141882	0.184375	0.531671	0.498038	0.471977	0.409849	0.0603516	0.084076	0.000260166	0.759789	0.999844
ENSFDAG00000003168	TMEM168	-0.180597	-0.125262	0.034995	-0.118505	-0.0237164	-0.250493	0.0918962	0.147885	0.0342668	0.00164036	0.0382936	0.0489954	0.0331421	0.043068	0.638625	0.498608	0.387562	0.544791	0.914674	0.168833	0.657901	0.794405	0.999844
ENSFDAG00000003170	ENSFDAG00000003170	0.0966584	-0.253119	-0.00354388	-0.131259	0.186282	0.116774	0.138187	0.0889991	0.0206222	0.000987188	0.0230456	0.0294861	0.0199454	0.0259189	0.745937	0.0779659	0.910195	0.387237	0.277997	0.408324	0.390704	0.751636	0.999844
ENSFDAG00000003174	SSR4	-0.0828528	0.113347	0.00537577	-0.003901	0.0539821	0.0470595	-0.173642	0.0894868	0.0207353	0.000992598	0.0231719	0.0296477	0.0200547	0.0260609	0.781806	0.431196	0.864515	0.979555	0.753892	0.739657	0.282095	0.861249	0.999844
ENSFDAG00000003178	DSEL	-1.23557	-0.246279	0.173157	-0.329488	0.101584	-0.371956	-0.0543708	0.367768	0.0852166	0.00407933	0.0952307	0.121844	0.0824196	0.107104	0.0416078	0.398863	0.00670598	0.285653	0.771037	0.195107	0.86805	0.728455	0.999844
ENSFDAG00000003179	METTL18	0.218727	0.287365	-0.0299798	0.0445867	-0.274471	-0.00150596	-0.313103	0.131072	0.0303711	0.00145387	0.0339401	0.0434252	0.0293742	0.0381716	0.545742	0.0991613	0.431714	0.808766	0.187798	0.992989	0.109029	0.838154	0.999844
ENSFDAG00000003191	NOL9	0.151674	-0.0226118	-0.0210713	-0.0566601	-0.0747862	0.103553	0.206662	0.0786188	0.018217	0.000872049	0.0203577	0.026047	0.0176191	0.0228959	0.588551	0.866952	0.475509	0.691285	0.643088	0.435312	0.172006	0.823347	0.999844
ENSFDAG00000003192	NUP107	0.281999	-0.00940264	-0.0342963	-0.0626229	0.0237954	-0.0170443	0.165913	0.076364	0.0176945	0.000847038	0.0197739	0.0253	0.0171137	0.0222392	0.307502	0.943648	0.238634	0.656077	0.88108	0.896338	0.2659	0.816724	0.999844
ENSFDAG00000003194	ICMT	-0.41032	0.192253	0.0258304	0.331431	-0.129514	0.145874	0.1485	0.176014	0.0407846	0.00195236	0.0455774	0.0583147	0.039446	0.0512599	0.328063	0.341111	0.558824	0.120553	0.591735	0.46266	0.511888	0.617848	0.999844
ENSFDAG00000003198	ENSFDAG00000003198	-0.191737	0.114164	0.0186491	-0.070895	-0.159997	0.0175218	0.0458301	0.0819706	0.0189937	0.000909228	0.0212257	0.0271575	0.0183702	0.023872	0.503052	0.40746	0.536263	0.626531	0.331607	0.897138	0.766754	0.809444	0.999844
ENSFDAG00000003202	LRRC8C	-0.120265	0.0119013	0.0103663	-0.242556	0.313756	0.0741808	0.083736	0.0558568	0.0129427	0.00061957	0.0144637	0.0185058	0.0125179	0.016267	0.610847	0.916684	0.677069	0.0437114	0.0210874	0.507319	0.511479	0.489106	0.858131
ENSFDAG00000003211	ATN1	0.35687	-0.535101	-0.0123539	-0.146926	0.0013384	-0.0751861	0.186258	0.22752	0.0527194	0.00252368	0.0589146	0.0753793	0.050989	0.06626	0.454358	0.0197794	0.805747	0.544965	0.99611	0.73916	0.469322	0.794405	0.999844
ENSFDAG00000003214	MRPL52	0.143393	-0.0698857	-0.0132393	0.00601063	0.121541	-0.0557868	0.00547135	0.0661833	0.0153355	0.000734113	0.0171377	0.0219271	0.0148322	0.0192743	0.577266	0.572524	0.6251	0.963379	0.411767	0.646904	0.968564	0.860841	0.999844
ENSFDAG00000003215	RF01183	0.308012	-0.385646	-0.0211558	0.286351	0.513874	-0.261036	-0.0707581	0.214064	0.0496013	0.00237442	0.0554301	0.070921	0.0479733	0.0623411	0.505586	0.083349	0.664172	0.223887	0.0536554	0.233342	0.776876	0.702216	0.999844
ENSFDAG00000003216	ENSFDAG00000003216	0.131769	-0.0952734	-0.0142996	0.0350713	0.125528	-0.0208984	0.0568684	0.0891021	0.0206461	0.000988331	0.0230723	0.0295202	0.0199684	0.0259489	0.658895	0.507292	0.649214	0.8174	0.465024	0.882429	0.724066	0.838154	0.999844
ENSFDAG00000003223	CYB561	-0.32713	0.144285	0.0279736	0.00901169	-0.0884667	0.101941	0.0321035	0.163635	0.0379163	0.00181506	0.0423719	0.0542135	0.0366717	0.0476548	0.418693	0.458704	0.511435	0.96508	0.703983	0.594497	0.883083	0.860841	0.999844
ENSFDAG00000003224	FAN1	0.0784862	-0.108314	-0.0133168	0.181377	0.175134	0.0347552	0.0958426	0.0801048	0.0185613	0.000888531	0.0207425	0.0265393	0.0179521	0.0233286	0.781543	0.4266	0.655057	0.207897	0.282357	0.79533	0.530331	0.686546	0.999844
ENSFDAG00000003227	UBXN11	0.0582522	-0.188162	0.00715085	-0.17946	-0.0486125	0.272387	-0.237359	0.0817857	0.0189508	0.000907176	0.0211778	0.0270962	0.0183288	0.0238182	0.838594	0.171674	0.812333	0.217507	0.767749	0.0442239	0.124053	0.696269	0.999844
ENSFDAG00000003235	ZNRD1	0.26511	-0.0908716	-0.0278349	0.138399	0.15527	0.0190783	-0.158262	0.116431	0.0269785	0.00129146	0.0301488	0.0385744	0.026093	0.0339077	0.437189	0.580094	0.438607	0.425409	0.429197	0.905982	0.390086	0.765711	0.999844
ENSFDAG00000003240	DECR2	0.086091	0.0183361	-0.00920333	0.0766995	-0.0220898	-0.0468186	-0.0729571	0.0418722	0.00970233	0.000464451	0.0108425	0.0138726	0.00938387	0.0121943	0.673958	0.852325	0.669346	0.461369	0.851231	0.628874	0.50882	0.772501	0.999844
ENSFDAG00000003243	DCAF6	0.0269367	-0.0125136	-0.00709836	0.133956	0.0534199	0.072925	-0.0396462	0.127453	0.0295325	0.00141372	0.033003	0.0422262	0.0285632	0.0371177	0.939855	0.941952	0.850258	0.460896	0.794892	0.66611	0.83696	0.772337	0.999844
ENSFDAG00000003244	ENSFDAG00000003244	-0.417027	-0.447658	0.0640865	0.215787	0.426871	-0.079602	-0.0870713	0.164558	0.0381301	0.00182529	0.0426109	0.0545192	0.0368786	0.0479235	0.303937	0.0218758	0.133606	0.295858	0.0675208	0.678499	0.690821	0.730519	0.999844
ENSFDAG00000003258	GREM2	0.216014	-0.501874	0.0201532	0.149207	0.0513964	-0.577209	-0.48682	0.518419	0.120125	0.00575037	0.134241	0.171757	0.116182	0.150978	0.764166	0.147608	0.79042	0.683834	0.901303	0.0903761	0.210246	0.821814	0.999844
ENSFDAG00000003265	ENSFDAG00000003265	-0.155143	0.0055981	0.0209168	-0.104007	0.0252433	-0.00925432	-0.03642	0.0351091	0.00813523	0.000389434	0.00909122	0.0116319	0.00786821	0.0102247	0.407679	0.95051	0.289176	0.275356	0.814941	0.916908	0.718715	0.727212	0.999844
ENSFDAG00000003267	VPS13A	0.336824	-0.172933	-0.0334993	-0.15281	0.0689991	0.0748393	0.172021	0.0501686	0.0116247	0.000556476	0.0129908	0.0166213	0.0112432	0.0146104	0.132636	0.108728	0.155585	0.180014	0.592516	0.480309	0.154693	0.670566	0.999844
ENSFDAG00000003278	RASL11B	0.109544	-0.0242525	-0.00529087	0.293449	-0.104604	-0.169859	-0.300807	0.261567	0.0606086	0.00290134	0.0677309	0.0866594	0.0586192	0.0761754	0.8304	0.921526	0.921753	0.259506	0.722338	0.48295	0.275763	0.71959	0.999844
ENSFDAG00000003281	COPS2	-0.297171	0.130699	0.0294907	-0.0310928	0.0055619	-0.0664738	0.0343258	0.0648672	0.0150306	0.000719514	0.0167968	0.021491	0.0145372	0.018891	0.243294	0.286393	0.271584	0.810401	0.969736	0.581409	0.802787	0.838154	0.999844
ENSFDAG00000003291	C15orf41	-0.128668	-0.320982	0.0392866	-0.105064	-0.0129392	-0.180805	-0.00998662	0.0431116	0.00998951	0.000478199	0.0111634	0.0142832	0.00966162	0.0125552	0.535463	0.00132043	0.0724061	0.320034	0.913784	0.0658508	0.928981	0.738574	0.999844
ENSFDAG00000003292	RHOBTB1	-0.317902	0.0671137	0.0237978	0.0675782	-0.0514779	0.175752	0.20978	0.0754554	0.017484	0.00083696	0.0195386	0.024999	0.0169101	0.0219746	0.247148	0.611759	0.41074	0.62877	0.744741	0.176524	0.157023	0.809444	0.999844
ENSFDAG00000003295	ARHGEF17	0.157064	-0.60067	0.00926429	-0.352549	0.171429	-0.034074	0.559293	0.765622	0.177405	0.00849237	0.198252	0.253657	0.171582	0.22297	0.857543	0.153836	0.919923	0.428483	0.733572	0.93444	0.236235	0.766288	0.999844
ENSFDAG00000003296	ZNF566	-0.459589	0.263406	0.0357126	0.175343	-0.156582	-0.0407598	0.13522	0.0649141	0.0150414	0.000720035	0.016809	0.0215066	0.0145477	0.0189047	0.0712549	0.0317351	0.183223	0.176234	0.285649	0.735412	0.325382	0.666839	0.999844
ENSFDAG00000003297	ENSFDAG00000003297	-0.508902	0.81954	0.0189937	-0.0306201	-0.0356817	0.261321	-0.41499	0.414117	0.0959563	0.00459344	0.107232	0.1372	0.0928067	0.120602	0.429054	0.00815328	0.779288	0.925501	0.923257	0.391005	0.232095	0.855337	0.999844
ENSFDAG00000003301	PSMB5	0.153561	0.00209022	-0.0146947	-0.131003	0.0044047	-0.0630995	0.055016	0.0409196	0.00948161	0.000453885	0.0105958	0.013557	0.00917039	0.0119169	0.447775	0.982874	0.490356	0.203136	0.969823	0.509948	0.61428	0.68117	0.999844
ENSFDAG00000003304	COX6A1	-0.0530403	0.122059	0.00557125	-0.115158	0.0796047	-0.0372103	-0.171416	0.0836057	0.0193725	0.000927364	0.021649	0.0276992	0.0187367	0.0243482	0.854455	0.380511	0.854839	0.433826	0.632433	0.785743	0.271965	0.766939	0.999844
ENSFDAG00000003306	ENSFDAG00000003306	0.0734214	-0.137595	0.00371211	-0.044348	-0.312861	-0.120902	0.173933	0.0794202	0.0184027	0.000880939	0.0205653	0.0263126	0.0177987	0.0231293	0.794455	0.310444	0.900469	0.757133	0.0537652	0.364814	0.252761	0.831319	0.999844
ENSFDAG00000003309	FLT3	0.073009	-0.792107	0.0257755	0.138646	-0.411015	0.327604	0.0430455	0.626057	0.145066	0.0069443	0.162113	0.207418	0.140304	0.182325	0.926482	0.0375525	0.757087	0.730583	0.366805	0.381787	0.919701	0.826388	0.999844
ENSFDAG00000003311	GTF2A1	-0.0980509	-0.0220025	0.0143277	-0.0639487	0.101413	-0.1821	0.135341	0.0875099	0.0202772	0.00097067	0.02266	0.0289927	0.0196116	0.0254852	0.740302	0.877204	0.645605	0.67097	0.551446	0.193489	0.396557	0.820087	0.999844
ENSFDAG00000003319	PBRM1	-0.053596	-0.00183562	0.0109253	-0.0949567	0.0354098	-0.102301	-0.0249872	0.0592598	0.0137313	0.000657317	0.0153449	0.0196333	0.0132806	0.017258	0.825741	0.987502	0.670011	0.443345	0.80049	0.374696	0.849148	0.769079	0.999844
ENSFDAG00000003322	FAR1	-0.334142	0.183536	0.0360105	-0.155326	0.0684625	-0.141614	-0.0286842	0.0781386	0.0181057	0.000866723	0.0202334	0.025888	0.0175115	0.0227561	0.231947	0.172568	0.221263	0.274848	0.670469	0.284551	0.849192	0.727016	0.999844
ENSFDAG00000003334	DHX33	0.528415	-0.183243	-0.0688664	0.4087	0.162377	0.109732	0.130964	0.0872157	0.020209	0.000967407	0.0225838	0.0288953	0.0195457	0.0253995	0.0735703	0.197395	0.0268199	0.00653596	0.339458	0.432517	0.411219	0.27939	0.999844
ENSFDAG00000003335	IL1R1	0.106506	-0.700642	0.0292161	-0.226856	-0.0644774	-0.254169	0.31097	0.101247	0.0234603	0.00112305	0.0262172	0.0335441	0.0226903	0.0294859	0.737837	4.78e-06	0.38331	0.161195	0.724804	0.091538	0.0701456	0.651488	0.999844
ENSFDAG00000003336	JPT2	0.116795	-0.0983921	-0.0106397	0.0188303	0.0477163	-0.0319262	0.0895356	0.0136592	0.00316502	0.00015151	0.00353695	0.00452541	0.00306113	0.00397793	0.317631	0.0803034	0.387376	0.75153	0.47813	0.563912	0.155723	0.830788	0.999844
ENSFDAG00000003337	ENSFDAG00000003337	1.1667	-1.16085	-0.0915721	0.797327	-1.07947	-0.201514	0.699602	1.3827	0.320389	0.015337	0.358039	0.458099	0.309873	0.402678	0.321104	0.0402794	0.459651	0.182692	0.110737	0.717349	0.270252	0.672324	0.999844
ENSFDAG00000003338	NEK6	0.156423	-0.0619713	-0.0269596	0.538768	0.0881011	-0.0623107	-0.0591435	0.214033	0.0174243	0.0026478	0.0403671	0.0468158	0.0173981	0.0228415	0.735279	0.638729	0.600329	0.00732788	0.683877	0.636639	0.695552	0.288709	0.999844
ENSFDAG00000003343	CANT1	0.326388	-0.00170965	-0.0460593	0.161179	-0.05043	0.260686	-0.0148701	0.174797	0.0405027	0.00193887	0.0452623	0.0579116	0.0391733	0.0509055	0.434997	0.993222	0.295549	0.448689	0.834012	0.187802	0.947452	0.770029	0.999844
ENSFDAG00000003347	MIR145	0.252479	-0.0722833	-0.0260524	0.405961	-0.352589	-0.00119859	-0.174509	0.404315	0.0936851	0.00448471	0.104694	0.133953	0.0906101	0.117747	0.691317	0.81331	0.697255	0.209606	0.335363	0.996823	0.611062	0.68737	0.999844
ENSFDAG00000003350	USP40	-0.217604	-0.248141	0.0365084	-0.0498743	0.108327	-0.114056	0.172885	0.0412991	0.00956954	0.000458095	0.0106941	0.0136827	0.00925544	0.0120274	0.284272	0.0111932	0.0880545	0.629603	0.354403	0.235801	0.114929	0.809444	0.999844
ENSFDAG00000003352	EMP3	0.464246	-0.38552	-0.026946	-0.3215	0.0571425	-0.120818	0.109409	0.0935425	0.021675	0.00103758	0.0242221	0.0309914	0.0209636	0.0272421	0.129039	0.0088294	0.402856	0.0388531	0.745489	0.404028	0.507411	0.472875	0.999844
ENSFDAG00000003357	TCF4	0.0426658	-0.130584	0.000819555	-0.0906548	0.14452	-0.0558567	0.110071	0.017473	0.00404871	0.000193812	0.00452449	0.00578894	0.00391582	0.00508859	0.746868	0.0401443	0.953056	0.177742	0.0575044	0.372064	0.122824	0.668563	0.999844
ENSFDAG00000003358	ABHD2	0.273896	-0.0422844	-0.0310047	-0.0819478	-0.0876864	0.213816	0.0385374	0.177141	0.0410459	0.00196487	0.0458693	0.0586882	0.0396986	0.0515882	0.515197	0.834674	0.484266	0.701996	0.717384	0.283213	0.865269	0.82511	0.999844
ENSFDAG00000003362	RANBP9	-0.526855	0.162212	0.0547826	0.116676	0.00677011	-0.141539	-0.0345366	0.0986693	0.022863	0.00109445	0.0255496	0.0326899	0.0221125	0.0287351	0.0934919	0.283363	0.0977343	0.465423	0.970131	0.341187	0.838558	0.774237	0.999844
ENSFDAG00000003367	ENSFDAG00000003367	-0.239108	0.107883	0.0279094	-0.114602	0.0368296	-0.0277356	-0.139803	0.0700845	0.0162395	0.000777386	0.0181478	0.0232196	0.0157065	0.0204105	0.36642	0.39723	0.316829	0.394934	0.809015	0.824852	0.327796	0.755736	0.999844
ENSFDAG00000003371	ALG11	-0.182115	0.161164	0.0169575	-0.0105719	-0.152301	-0.0749888	0.00485592	0.0361299	0.00837176	0.000400757	0.00935555	0.0119701	0.00809697	0.010522	0.33801	0.0781701	0.396954	0.912965	0.163907	0.404639	0.962243	0.852997	0.999844
ENSFDAG00000003375	LGALS8	-0.263419	-0.00339711	0.0283777	0.168321	0.151836	-0.175945	0.0234737	0.0545233	0.0126338	0.000604779	0.0141184	0.018064	0.0122191	0.0158786	0.259268	0.975889	0.24853	0.156602	0.258598	0.111454	0.852222	0.648382	0.999844
ENSFDAG00000003380	EXOC6	0.221858	-0.583084	-0.0154212	0.685729	0.407116	-0.0401382	0.23927	0.227717	0.0347968	0.00267771	0.0506048	0.06283	0.0341491	0.044772	0.641989	0.00177321	0.765693	0.00230146	0.104337	0.828049	0.258139	0.19049	0.999844
ENSFDAG00000003386	RNPS1	0.0600495	0.00232221	-0.00915604	9.8e-05	0.0450106	-0.00723563	0.0759918	0.0235803	0.00546386	0.000261555	0.00610593	0.00781234	0.00528452	0.00686721	0.695758	0.974938	0.571297	0.998999	0.610583	0.920714	0.359135	0.862948	0.999844
ENSFDAG00000003392	ENSFDAG00000003392	0.0180612	0.39208	-0.0225286	0.0933301	-0.0843077	0.121496	-0.18836	0.068429	0.0158559	0.000759022	0.0177192	0.0226711	0.0153354	0.0199283	0.944954	0.00184746	0.413514	0.48322	0.575529	0.326542	0.182107	0.781132	0.999844
ENSFDAG00000003393	ENSFDAG00000003393	0.155859	-0.0243443	-0.00992394	-0.0811961	0.100562	-0.0890699	-0.151056	0.218031	0.0505207	0.00241843	0.0564575	0.0722356	0.0488625	0.0634965	0.738539	0.913751	0.840074	0.732559	0.708285	0.68699	0.548865	0.826388	0.999844
ENSFDAG00000003399	PPHLN1	0.0196327	0.0719844	-0.00610105	0.0155164	0.0100074	-0.00859789	-0.0111245	0.0417756	0.00967994	0.00046338	0.0108175	0.0138406	0.00936222	0.0121662	0.923477	0.464383	0.776852	0.881407	0.932211	0.929194	0.919664	0.844682	0.999844
ENSFDAG00000003400	REEP3	-0.176904	0.300701	0.0159188	-0.452324	-0.218316	0.0349138	0.0704807	0.212715	0.0492888	0.00235946	0.0550809	0.0704742	0.047671	0.0619483	0.701301	0.175595	0.743122	0.0539421	0.410862	0.872954	0.777042	0.510986	0.999844
ENSFDAG00000003404	PCBP2	0.144796	0.108842	-0.0216721	-0.0992393	-0.0410645	0.0555378	0.0268337	0.0782922	0.0181413	0.000868427	0.0202732	0.0259388	0.0175459	0.0228008	0.604818	0.419037	0.462085	0.485813	0.798745	0.675014	0.858953	0.782002	0.999844
ENSFDAG00000003406	ENSFDAG00000003406	-0.0826483	0.103785	0.00428754	-0.0454214	-0.020972	0.00959833	0.0529174	0.024408	0.00565564	0.000270736	0.00632026	0.00808656	0.00547001	0.00710825	0.596795	0.167572	0.794419	0.567771	0.815594	0.896742	0.530234	0.80124	0.999844
ENSFDAG00000003407	MARK3	-0.239343	-0.0123018	0.0310907	-0.166178	0.024571	-0.0293455	0.0983143	0.0806458	0.0186867	0.000894533	0.0208826	0.0267186	0.0180733	0.0234862	0.399334	0.928294	0.298564	0.250163	0.880512	0.827208	0.521185	0.716241	0.999844
ENSFDAG00000003408	ENSFDAG00000003408	0.255213	0.36048	-0.0529835	0.151441	0.0685734	0.138952	-0.174667	0.260822	0.0604359	0.00289307	0.0675378	0.0864124	0.0584522	0.0759583	0.617269	0.142556	0.324596	0.560073	0.815548	0.565472	0.526239	0.798175	0.999844
ENSFDAG00000003409	ENSFDAG00000003409	0.0263591	0.155026	-0.00801589	-0.0600503	-0.03578	0.0636989	-0.128542	0.0336532	0.0077979	0.000373286	0.00871425	0.0111496	0.00754195	0.00980072	0.885748	0.0791636	0.678224	0.520042	0.734721	0.463264	0.194143	0.789669	0.999844
ENSFDAG00000003444	RHOBTB2	0.137475	-0.00786344	-0.0177132	0.0882568	-0.211914	0.0096459	0.138501	0.215336	0.0498962	0.00238854	0.0557597	0.0713427	0.0482585	0.0627117	0.767036	0.971918	0.717027	0.708586	0.427553	0.964977	0.580216	0.825346	0.999844
ENSFDAG00000003447	RPN2	-0.132102	-0.0479452	0.0216773	-0.116188	-0.021464	-0.0552249	0.0287306	0.0131499	0.00304701	0.000145861	0.00340507	0.00435668	0.002947	0.00382961	0.249327	0.385079	0.0726724	0.0464678	0.74504	0.309015	0.642457	0.494271	0.999844
ENSFDAG00000003448	S100A4	0.387787	0.0845894	-0.039458	-0.250721	0.00311171	-0.0970155	-0.117245	0.192907	0.0446991	0.00213975	0.0499518	0.0639116	0.0432319	0.0561797	0.377282	0.689084	0.393655	0.261948	0.990179	0.640791	0.620842	0.71959	0.999844
ENSFDAG00000003459	CCDC115	0.133216	0.107105	-0.0246042	0.0542542	-0.0690061	0.0811104	0.0589735	0.0288704	0.00668964	0.000320233	0.00747575	0.00956498	0.00647006	0.00840782	0.433025	0.190361	0.169158	0.530339	0.48045	0.313274	0.520124	0.791153	0.999844
ENSFDAG00000003460	ENSFDAG00000003460	0.0890208	-0.189398	0.000943109	-0.0295507	-0.0117376	0.0181197	-0.0347721	0.0766191	0.0177536	0.000849868	0.0198399	0.0253845	0.0171709	0.0223135	0.747752	0.155187	0.974192	0.833827	0.941272	0.890021	0.815932	0.838154	0.999844
ENSFDAG00000003464	RF00561	0.388384	-0.0121169	-0.0269383	-0.222231	0.530223	-0.0212724	-0.909684	0.863881	0.200172	0.00958227	0.223695	0.286211	0.193602	0.251585	0.676047	0.978394	0.783169	0.638449	0.321639	0.96144	0.069735	0.81253	0.999844
ENSFDAG00000003472	JAGN1	0.0726762	0.0882361	-0.00970669	-0.0962382	-0.0723841	-0.0337933	0.0431757	0.0188698	0.00437238	0.000209306	0.00488619	0.00625172	0.00422886	0.00549539	0.596761	0.182071	0.502262	0.168582	0.359945	0.603301	0.56028	0.66041	0.999844
ENSFDAG00000003474	RF00191	0.499158	-0.222557	-0.0468732	0.0992644	-0.415778	0.321525	-0.0715454	0.436788	0.10121	0.00484491	0.113103	0.144711	0.0978875	0.127204	0.450087	0.484197	0.500684	0.767872	0.274405	0.304108	0.841012	0.832206	0.999844
ENSFDAG00000003475	DCC	-0.388554	-0.7056	0.101255	-0.728816	-0.331429	-0.0484766	0.238438	0.731079	0.1694	0.00810921	0.189307	0.242212	0.16384	0.21291	0.649517	0.0864629	0.260838	0.0939192	0.500674	0.904671	0.605333	0.583018	0.999844
ENSFDAG00000003478	CEP63	0.0753631	0.0988509	-0.00897721	-0.130602	-0.0726891	0.029664	-0.0677364	0.0275049	0.00637324	0.000305088	0.00712218	0.0091126	0.00616405	0.00801016	0.64953	0.215632	0.60728	0.121731	0.446381	0.705557	0.449149	0.620397	0.999844
ENSFDAG00000003486	RAB28	-0.693914	-0.0624269	0.0813368	0.2173	0.0819261	0.105368	-0.0247969	0.202367	0.00590662	0.00258269	0.0339284	0.03585	0.00597239	0.00781665	0.122943	0.416635	0.109491	0.238113	0.66524	0.172746	0.779117	0.710962	0.999844
ENSFDAG00000003489	LZTR1	0.14227	-0.0992758	-0.0136612	0.0298759	-0.0273377	0.0494029	-0.00597919	0.184356	0.0427177	0.0020449	0.0477376	0.0610786	0.0413156	0.0536894	0.740381	0.630993	0.762574	0.891237	0.911921	0.807967	0.979413	0.846142	0.999844
ENSFDAG00000003491	GANAB	0.671152	-0.362384	-0.0638653	0.191408	0.00648372	0.0229423	0.0741235	0.261795	0.0606614	0.00290387	0.0677899	0.0867349	0.0586703	0.0762418	0.189616	0.141199	0.235955	0.462245	0.982436	0.92454	0.788355	0.772868	0.999844
ENSFDAG00000003498	ENSFDAG00000003498	0.0418665	0.0225006	-0.000324144	-0.072629	-0.0980641	-0.119973	0.00707827	0.0415333	0.0096238	0.000460692	0.0107547	0.0137603	0.00930792	0.0120956	0.837235	0.818588	0.987951	0.483713	0.403166	0.213671	0.948684	0.78143	0.999844
ENSFDAG00000003500	C5orf22	0.0410593	-0.0243305	-0.00259506	-0.0228785	-0.120756	0.00464713	0.0345725	0.0420186	0.00973625	0.000466075	0.0108804	0.0139211	0.00941668	0.0122369	0.841242	0.805235	0.904321	0.826391	0.306088	0.961805	0.754637	0.838154	0.999844
ENSFDAG00000003501	ENSFDAG00000003501	-0.389989	-0.0820678	0.0664803	-0.198832	-0.175168	-0.383793	-0.000878184	0.672298	0.15578	0.00745721	0.174086	0.222738	0.150667	0.195791	0.634336	0.835284	0.44139	0.633686	0.71052	0.322784	0.998416	0.810245	0.999844
ENSFDAG00000003504	NAALADL2	-0.298171	-0.05455	0.0521386	-0.504973	-0.139262	-0.0898499	0.0478666	0.111124	0.0257488	0.0012326	0.0287746	0.0368162	0.0249036	0.0323622	0.371075	0.733894	0.137524	0.00291185	0.467965	0.569113	0.790177	0.210092	0.999844
ENSFDAG00000003506	ENSFDAG00000003506	0.0418971	0.110551	-0.00962761	-0.00609625	-0.0566828	-0.0274998	0.0311234	0.0221194	0.00512535	0.000245351	0.00572764	0.00732833	0.00495712	0.00644175	0.778168	0.122543	0.538789	0.935798	0.507883	0.696105	0.698179	0.856248	0.999844
ENSFDAG00000003509	RF00089	0.11599	0.0763833	-0.0278859	0.161981	-0.111108	0.472878	-0.114225	0.138585	0.0321119	0.0015372	0.0358855	0.0459143	0.0310579	0.0403596	0.755363	0.669925	0.476932	0.392508	0.604092	0.00729082	0.569645	0.7547	0.999844
ENSFDAG00000003510	TRABD	1.09648	-0.372462	-0.121506	0.0828778	0.178465	0.170353	0.263981	0.34026	0.0788427	0.00377421	0.0881077	0.112731	0.0762548	0.0990928	0.0601442	0.18468	0.04795	0.780083	0.595048	0.537299	0.401697	0.833353	0.999844
ENSFDAG00000003517	LDLR	1.56333	-0.394189	-0.175989	0.207699	0.0364335	0.176014	0.256384	0.856531	0.198469	0.00950074	0.221792	0.283776	0.191955	0.249445	0.091182	0.376251	0.070991	0.659196	0.945473	0.687874	0.607715	0.816736	0.999844
ENSFDAG00000003520	KIF23	0.580277	-0.0870693	-0.0682008	-0.0493277	0.107872	-0.0444825	0.252792	0.127236	0.0294823	0.00141132	0.0329468	0.0421544	0.0285146	0.0370546	0.103783	0.612092	0.0694595	0.785807	0.599307	0.792224	0.189104	0.834195	0.999844
ENSFDAG00000003523	FRMD8	1.04321	-0.208191	-0.111438	0.0841401	-0.209426	0.222599	-0.0762676	0.309969	0.0718239	0.00343822	0.0802641	0.102695	0.0694664	0.0902713	0.0609653	0.437259	0.0573675	0.766474	0.513425	0.39835	0.799617	0.831683	0.999844
ENSFDAG00000003533	ENSFDAG00000003533	0.517538	-0.0815057	-0.0471414	0.0774134	-0.372957	-0.335448	0.164188	0.236847	0.0548806	0.00262714	0.0613297	0.0784694	0.0530792	0.0689762	0.287588	0.727901	0.357713	0.754589	0.183057	0.145392	0.531867	0.831065	0.999844
ENSFDAG00000003534	PTPRB	-0.00425003	0.266773	0.00344848	-0.236814	-0.361839	-0.189585	-0.120871	0.211122	0.0489198	0.00234179	0.0546685	0.0699465	0.0473141	0.0614844	0.99262	0.227762	0.94319	0.311138	0.171266	0.383436	0.62593	0.737181	0.999844
ENSFDAG00000003541	PRR19	-0.955982	0.0288132	0.106794	0.223863	-0.282146	0.10409	-0.0190749	0.334726	0.0775603	0.00371282	0.0866746	0.110897	0.0750146	0.0974811	0.098461	0.917598	0.0796615	0.447021	0.396853	0.70391	0.951284	0.770029	0.999844
ENSFDAG00000003555	B4GALT3	1.20373	-0.201523	-0.139928	0.0793916	0.0681736	0.364691	0.0315959	0.388053	0.0899169	0.00430433	0.100483	0.128565	0.0869656	0.113011	0.0533168	0.501551	0.0329405	0.802237	0.849206	0.216213	0.925119	0.837953	0.999844
ENSFDAG00000003556	ENSFDAG00000003556	-0.176409	-0.0741777	0.0237987	0.20942	-0.203521	0.0826689	-0.133602	0.19431	0.0450242	0.00215531	0.0503151	0.0643766	0.0435464	0.0565883	0.689012	0.726652	0.608216	0.350502	0.422478	0.69199	0.574369	0.742925	0.999844
ENSFDAG00000003557	ENSFDAG00000003557	0.144858	0.00260147	-0.0302376	0.4864	0.236454	0.0786356	-0.11412	0.0849805	0.0196911	0.000942613	0.022005	0.0281547	0.0190448	0.0247486	0.619249	0.985209	0.324686	0.00104201	0.158777	0.568805	0.468197	0.143622	0.999844
ENSFDAG00000003558	MTIF3	-0.130404	0.11741	0.00692313	0.0768082	0.0109486	0.00210024	0.0250995	0.0310743	0.00720031	0.000344679	0.00804644	0.0102952	0.00696397	0.00904965	0.459444	0.166463	0.709221	0.391854	0.914071	0.979921	0.7919	0.7547	0.999844
ENSFDAG00000003560	WSCD2	-0.388564	0.109662	0.0480955	-0.256209	-0.00234532	-0.10024	0.0385352	0.31642	0.0733186	0.00350977	0.0819345	0.104832	0.070912	0.0921499	0.489713	0.685482	0.416889	0.370746	0.99422	0.706599	0.898985	0.746447	0.999844
ENSFDAG00000003561	DARS2	-0.0287487	-0.0022126	-0.00111989	0.0238094	0.07154	0.02184	0.109689	0.0340986	0.00790109	0.000378226	0.00882957	0.0112971	0.00764175	0.00993042	0.87628	0.980141	0.95408	0.799971	0.500898	0.802714	0.271015	0.837682	0.999844
ENSFDAG00000003566	RF00569	0.389719	-0.280908	-0.0466357	0.11341	0.484026	0.494849	-0.294781	0.371767	0.0861431	0.00412368	0.0962661	0.123169	0.0833157	0.108268	0.522713	0.338521	0.467696	0.71472	0.167842	0.086457	0.370318	0.826038	0.999844
ENSFDAG00000003567	FBXO33	-0.192571	0.114806	0.0155655	0.182239	0.187473	-0.185592	-0.100413	0.10303	0.0238733	0.00114282	0.0266787	0.0341346	0.0230897	0.030005	0.548545	0.457461	0.645198	0.264539	0.310243	0.221944	0.562124	0.720636	0.999844
ENSFDAG00000003575	PHETA2	1.12191	-0.460093	-0.126557	0.173071	0.0301607	0.43476	0.218013	0.445855	0.10331	0.00494548	0.115451	0.147715	0.0999194	0.129845	0.0929176	0.152304	0.0719189	0.610499	0.937451	0.169012	0.545166	0.808022	0.999844
ENSFDAG00000003587	ENSFDAG00000003587	-0.00181281	-0.0211357	0.00637656	-0.234158	0.0262076	-0.0524766	0.0551385	0.0361118	0.00836757	0.000400556	0.00935086	0.0119641	0.00809292	0.0105167	0.992389	0.817272	0.750025	0.0154568	0.810641	0.559673	0.590805	0.369634	0.999844
ENSFDAG00000003588	ENSFDAG00000003588	0.0917685	-0.216864	0.00254747	-0.198797	0.0666529	-0.0708042	0.164289	0.0564493	0.01308	0.000626143	0.0146171	0.0187021	0.0126507	0.0164395	0.699314	0.0579345	0.918911	0.100115	0.625984	0.529016	0.200076	0.588364	0.999844
ENSFDAG00000003589	NSUN2	-0.247442	-0.0973912	1.44e-05	0.764511	0.421073	0.2524	0.260826	0.496192	0.114974	0.00550383	0.128485	0.164393	0.1112	0.144504	0.725381	0.773941	0.999845	0.0329383	0.299026	0.449112	0.492627	0.454185	0.999844
ENSFDAG00000003590	RF00100	1.15562	-0.0395419	-0.120897	-0.501189	1.02943	0.246473	-1.07528	0.75807	0.175655	0.0084086	0.196296	0.251155	0.169889	0.22077	0.184419	0.924834	0.187363	0.257964	0.0399634	0.549854	0.0221079	0.71959	0.999844
ENSFDAG00000003591	IDNK	-0.15071	-0.0849846	0.0173514	0.0457683	-0.0759698	0.116238	0.0773838	0.0742829	0.0172123	0.000823954	0.019235	0.0246105	0.0166473	0.0216332	0.580286	0.517134	0.545524	0.741397	0.6282	0.367642	0.5988	0.828951	0.999844
ENSFDAG00000003595	RNASEH2A	0.50122	-0.26542	-0.0481797	0.150541	0.0618802	-0.0160564	0.0284585	0.117397	0.0272025	0.00130219	0.0303992	0.0388947	0.0263096	0.0341893	0.143509	0.107557	0.18183	0.387905	0.753699	0.921146	0.87768	0.751804	0.999844
ENSFDAG00000003602	SSSCA1	0.232572	0.0375066	-0.0254792	-0.0782595	0.0314644	-0.053204	0.00119211	0.097893	0.0226831	0.00108584	0.0253486	0.0324327	0.0219385	0.028509	0.457283	0.803335	0.439393	0.623044	0.861304	0.719443	0.994367	0.809405	0.999844
ENSFDAG00000003603	ENSFDAG00000003603	0.220552	-0.119205	-0.015622	-0.126997	0.0993273	-0.103786	0.0014861	0.0924052	0.0214115	0.00102497	0.0239276	0.0306146	0.0207087	0.0269109	0.468119	0.415273	0.62558	0.411647	0.570251	0.47078	0.992772	0.760695	0.999844
ENSFDAG00000003605	SH3BP5	-0.359151	0.196563	0.0184253	0.56196	0.232344	-0.108711	-0.0136115	0.111086	0.0257401	0.00123218	0.0287649	0.0368038	0.0248953	0.0323513	0.281224	0.220512	0.599652	0.000921685	0.225852	0.490828	0.939676	0.136015	0.999844
ENSFDAG00000003614	LIPT1	0.415133	0.107099	-0.0547132	-0.230302	-0.247584	0.357763	0.079025	0.10857	0.0251571	0.00120427	0.0281134	0.0359701	0.0243314	0.0316185	0.207709	0.499528	0.114881	0.169585	0.191748	0.0218153	0.656739	0.660536	0.999844
ENSFDAG00000003618	DNAJC13	-0.0024654	-0.0558636	0.00293975	-0.0432411	0.0350255	-0.0619538	0.0987502	0.0527798	0.0122298	0.00058544	0.0136669	0.0174864	0.0118284	0.0153709	0.991438	0.613454	0.903297	0.711472	0.791109	0.568917	0.425739	0.826038	0.999844
ENSFDAG00000003619	AASS	-1.00155	0.00346615	0.124801	-0.18326	-0.0968846	-0.13514	-0.0326272	0.138476	0.0297161	0.00155432	0.0347792	0.0443726	0.028819	0.0375434	0.0071144	0.983958	0.00154793	0.325769	0.645562	0.425998	0.866278	0.74009	0.999844
ENSFDAG00000003629	RUFY1	0.218232	-0.121116	-0.0242632	0.169968	-0.162271	0.081252	0.0800145	0.0311763	0.00722396	0.000345812	0.00807287	0.010329	0.00698685	0.00907938	0.216473	0.154158	0.191976	0.0585311	0.110341	0.331021	0.401059	0.523613	0.999844
ENSFDAG00000003635	RF02107	1.10962	-0.0697492	-0.103555	-0.170839	-0.727204	-0.178866	-0.110685	0.684649	0.158642	0.00759421	0.177285	0.22683	0.153435	0.199388	0.17991	0.860987	0.234713	0.684931	0.12679	0.647936	0.804227	0.821814	0.999844
ENSFDAG00000003637	RRM1	0.25954	0.0635531	-0.0365522	-0.0714082	0.100309	-0.001698	0.151107	0.0694854	0.0161007	0.00077074	0.0179927	0.0230211	0.0155722	0.020236	0.324822	0.616471	0.187967	0.594481	0.508539	0.989143	0.288128	0.806016	0.999844
ENSFDAG00000003638	BNIP3L	-0.00660369	-0.0894584	-2.48e-05	0.111296	0.0497521	0.139412	-0.0445117	0.0488973	0.0113301	0.000542375	0.0126616	0.0162001	0.0109582	0.0142402	0.976176	0.400665	0.99915	0.322617	0.69588	0.182935	0.709144	0.738579	0.999844
ENSFDAG00000003641	ENSFDAG00000003641	-0.259931	0.100588	0.0276178	0.00428968	0.191664	-0.173284	-0.0298174	0.0790889	0.0183259	0.000877264	0.0204795	0.0262028	0.0177244	0.0230328	0.355344	0.457457	0.351105	0.976087	0.236396	0.193059	0.844242	0.860841	0.999844
ENSFDAG00000003642	ADAM8	-0.991251	0.0725584	0.0223875	2.51359	2.08549	0.955733	0.519924	1.92485	0.201139	0.0234479	0.383654	0.457364	0.199655	0.262198	0.474936	0.871475	0.883762	4.95e-05	0.00204418	0.0324412	0.309928	0.0637915	0.4767
ENSFDAG00000003645	ADD2	-0.981225	-0.437612	0.143292	-0.734097	0.19486	-0.0169953	0.279763	0.2009	0.046551	0.0022284	0.0520214	0.0665597	0.0450231	0.0585073	0.0285846	0.0425335	0.00240169	0.00128833	0.450072	0.936161	0.247434	0.155275	0.999844
ENSFDAG00000003648	ENSFDAG00000003648	0.179106	0.238074	-0.0319353	-0.321421	0.292428	0.191409	-0.128559	0.187271	0.0433931	0.00207723	0.0484924	0.0620444	0.0419688	0.0545383	0.678961	0.253087	0.483494	0.144396	0.240396	0.350134	0.581981	0.638215	0.999844
ENSFDAG00000003652	ZNHIT6	-0.192879	0.14309	0.0175798	-0.200951	0.0402839	0.0517144	0.00354405	0.0447815	0.0103764	0.000496721	0.0115958	0.0148365	0.0100359	0.0130416	0.362055	0.160108	0.43024	0.0620245	0.740853	0.605701	0.975243	0.531956	0.999844
ENSFDAG00000003654	STXBP4	-0.105563	-0.0654043	0.020722	-0.132674	-0.00174037	-0.148042	0.0516361	0.0536557	0.0124327	0.000595156	0.0138937	0.0177766	0.0120247	0.015626	0.648587	0.55749	0.395654	0.260342	0.989585	0.177002	0.679551	0.71959	0.999844
ENSFDAG00000003664	SF3B5	0.306205	-0.180599	-0.0272465	-0.0444614	0.169913	0.0418351	-0.0497518	0.087357	0.0202417	0.000968974	0.0226204	0.0289421	0.0195774	0.0254407	0.300199	0.204305	0.381413	0.767521	0.317911	0.764944	0.755101	0.832069	0.999844
ENSFDAG00000003669	ITPRIPL1	0.143468	-0.20399	-0.00249971	-0.11242	-0.17492	-0.0223705	0.113017	0.029333	0.00679684	0.000325365	0.00759556	0.00971827	0.00657375	0.00854256	0.402213	0.0133491	0.889781	0.197079	0.076002	0.782617	0.221413	0.678929	0.999844
ENSFDAG00000003670	ABCB6	-0.186083	-0.0893076	0.0257775	0.0562373	0.0181443	0.0155641	-0.0451993	0.0958156	0.0222017	0.0010628	0.0248107	0.0317445	0.021473	0.0279041	0.547734	0.548926	0.429115	0.721069	0.918886	0.915413	0.786713	0.826038	0.999844
ENSFDAG00000003674	TMEM186	0.04204	-0.154793	0.00709687	-0.11464	-0.0301104	-0.0179144	-0.0102673	0.0597522	0.0138454	0.000662778	0.0154724	0.0197964	0.0133909	0.0174014	0.863451	0.188333	0.782805	0.35672	0.830543	0.876972	0.937961	0.743177	0.999844
ENSFDAG00000003679	YBX1	-0.11448	0.0288884	0.0162074	-0.2118	0.163815	-0.0521198	-0.0280393	0.0725984	0.016822	0.00080527	0.0187988	0.0240524	0.0162698	0.0211426	0.670924	0.823744	0.567905	0.122404	0.290845	0.682824	0.847087	0.621386	0.999844
ENSFDAG00000003682	ABHD13	-0.329085	-0.0820883	0.0312116	0.384036	0.0783353	0.200217	-0.113686	0.202114	0.0468323	0.00224187	0.0523357	0.0669618	0.0452952	0.0588608	0.46417	0.704449	0.509773	0.0932112	0.762102	0.346832	0.639362	0.581368	0.999844
ENSFDAG00000003683	PTHLH	-1.36871	0.337645	0.163142	-0.260803	0.330552	-0.0516617	-1.33264	0.689145	0.0958271	0.00818803	0.148638	0.18278	0.0943326	0.123774	0.0991977	0.275393	0.0714018	0.498744	0.43942	0.866422	0.00015194	0.784754	0.999844
ENSFDAG00000003686	RF00287	-0.160589	0.237178	-0.00279419	0.117239	-0.131536	0.464725	-0.151599	0.293039	0.0679009	0.00325042	0.0758801	0.0970861	0.0656722	0.0853407	0.766729	0.362718	0.960911	0.670395	0.672916	0.0697625	0.603802	0.819938	0.999844
ENSFDAG00000003689	ZNF23	-0.0326706	0.168985	-0.00315239	-0.1206	-0.0268124	0.00165463	0.0521002	0.0960271	0.0222507	0.00106514	0.0248655	0.0318146	0.0215204	0.0279657	0.916035	0.257273	0.923051	0.444388	0.88051	0.991001	0.755383	0.769216	0.999844
ENSFDAG00000003690	C12orf66	-0.0220901	-0.159138	0.0133164	0.043916	-0.00463571	-0.174759	0.0402905	0.0348219	0.00806869	0.000386249	0.00901686	0.0115368	0.00780385	0.0101411	0.905768	0.0764564	0.498046	0.643736	0.965575	0.0478984	0.689088	0.814561	0.999844
ENSFDAG00000003694	XPO7	0.118153	0.104031	-0.0233164	0.0541087	-0.0436674	0.087717	0.0255087	0.0993749	0.0230265	0.00110228	0.0257324	0.0329237	0.0222707	0.0289406	0.707806	0.492985	0.482499	0.735884	0.809819	0.556678	0.880807	0.827273	0.999844
ENSFDAG00000003699	SRSF12	-0.249734	-0.0346261	0.0355604	0.408218	-0.132735	-0.492298	-0.0208314	0.339157	0.0785871	0.00376197	0.0878221	0.112365	0.0760076	0.0987716	0.668053	0.901697	0.562067	0.168359	0.692123	0.0741539	0.947153	0.66041	0.999844
ENSFDAG00000003700	TAF10	-0.361657	0.0424736	0.0267604	0.0260361	0.0806861	0.139481	0.397238	0.240655	0.0557628	0.00266937	0.0623156	0.0797308	0.0539325	0.070085	0.460986	0.857259	0.604493	0.916933	0.77507	0.548103	0.133483	0.854032	0.999844
ENSFDAG00000003701	CLDN17	3.58285	0.228007	-0.404826	-0.205368	-1.86418	-0.441353	-0.436811	3.60532	0.0945941	0.0460947	0.602111	0.631773	0.0956909	0.125205	0.0591691	0.45849	0.0593527	0.791269	0.0190094	0.153649	0.217025	0.835846	0.83583
ENSFDAG00000003702	MCM6	0.484152	-0.0103595	-0.0567611	-0.0418773	0.0422249	-0.0391246	0.0995732	0.073264	0.0169762	0.000812653	0.0189711	0.024273	0.016419	0.0213364	0.073664	0.936627	0.0464672	0.761097	0.786373	0.760111	0.49544	0.831509	0.999844
ENSFDAG00000003706	SGO1	0.451747	0.166019	-0.0630746	-0.00522872	-0.0135056	0.00310634	0.114627	0.198628	0.0460247	0.0022032	0.0514331	0.065807	0.044514	0.0578457	0.310764	0.439013	0.179021	0.981606	0.958013	0.988253	0.633648	0.861287	0.999844
ENSFDAG00000003718	ISCU	-0.0901432	0.0667484	0.0122972	-0.0563883	0.0064183	-0.0547808	-0.135269	0.0389487	0.00902493	0.000432024	0.0100855	0.012904	0.00872871	0.0113429	0.647845	0.482294	0.554097	0.574465	0.954943	0.557643	0.204051	0.803968	0.999844
ENSFDAG00000003720	ENSFDAG00000003720	-0.130781	-0.140131	0.0255906	-0.0542375	-0.0498816	-0.076833	0.0357618	0.0142636	0.00330505	0.000158213	0.00369344	0.00472563	0.00319657	0.00415393	0.273499	0.0147893	0.0419005	0.372152	0.468071	0.17416	0.578985	0.747107	0.999844
ENSFDAG00000003721	CDK5RAP1	0.164757	-0.0378346	-0.0117578	-0.25121	-0.00208219	0.00177525	0.0189661	0.0361263	0.00837092	0.000400717	0.00935462	0.0119689	0.00809617	0.0105209	0.386036	0.679222	0.556958	0.00939574	0.984815	0.984259	0.853303	0.312921	0.999844
ENSFDAG00000003729	HPGDS	-0.336062	-0.398956	0.0393876	0.249156	0.96443	0.342808	-0.299542	0.718153	0.166405	0.00796584	0.18596	0.23793	0.160944	0.209145	0.691691	0.328072	0.658989	0.563413	0.0480214	0.392826	0.512475	0.799037	0.999844
ENSFDAG00000003732	ENSFDAG00000003732	-0.149606	-0.0186227	0.0357009	-0.217202	-0.423123	-0.155339	-0.11374	0.0875683	0.0202907	0.000971318	0.0226751	0.0290121	0.0196247	0.0255022	0.613164	0.895984	0.251999	0.149187	0.0129862	0.26749	0.476319	0.64482	0.736278
ENSFDAG00000003733	RF00086	-0.104064	0.22	-0.0196285	0.103331	0.00983231	0.616329	0.141653	0.75105	0.174028	0.00833073	0.194478	0.248829	0.168316	0.218726	0.904421	0.597939	0.829726	0.814743	0.984274	0.133025	0.761978	0.838154	0.999844
ENSFDAG00000003737	SDR42E1	-0.214326	-0.0222119	0.0315395	0.0408064	-0.139896	-0.160957	-0.0548234	0.0788382	0.0182678	0.000874482	0.0204145	0.0261197	0.0176682	0.0229598	0.445274	0.869464	0.286178	0.775185	0.386705	0.225928	0.717493	0.833193	0.999844
ENSFDAG00000003743	ZNF689	0.751264	-0.388244	-0.0793961	0.36106	0.127607	0.00407056	0.0916678	0.293014	0.0678951	0.00325015	0.0758737	0.0970779	0.0656666	0.0853335	0.165177	0.136225	0.16372	0.189928	0.682131	0.987326	0.753671	0.67691	0.999844
ENSFDAG00000003744	ENSFDAG00000003744	0.427857	0.0749912	-0.0736477	0.507197	0.0305662	-0.193965	0.617179	0.809363	0.18754	0.00897755	0.209578	0.268148	0.181384	0.235708	0.634371	0.862521	0.436991	0.267902	0.95293	0.648799	0.203647	0.722133	0.999844
ENSFDAG00000003756	ACAT1	0.00738483	0.0982224	0.000800794	-0.120018	0.000374341	-0.0811055	-0.101301	0.0356165	0.00825282	0.000395063	0.00922263	0.0118	0.00798194	0.0103725	0.968786	0.279605	0.967863	0.211396	0.99725	0.363977	0.319902	0.689727	0.999844
ENSFDAG00000003758	GSTK1	-0.0972004	-0.158214	0.0176979	0.0958988	0.146027	-0.0512973	-0.0203386	0.0379529	0.00879417	0.000420978	0.0098276	0.0125741	0.00850552	0.0110529	0.617824	0.0915788	0.388376	0.333362	0.19283	0.578063	0.846601	0.741203	0.999844
ENSFDAG00000003761	PIK3CA	0.00133642	0.0728324	0.00368437	-0.134398	0.0837532	-0.158953	-0.0837265	0.086492	0.0200413	0.00095938	0.0223964	0.0286555	0.0193835	0.0251888	0.996374	0.606922	0.905314	0.369156	0.620767	0.253578	0.597815	0.745349	0.999844
ENSFDAG00000003767	RF00019	-0.365581	0.520177	0.0252228	-0.299071	0.599439	0.12809	-0.755078	0.48549	0.112494	0.00538511	0.125714	0.160847	0.108802	0.141388	0.599807	0.120924	0.731062	0.398951	0.135006	0.697774	0.0446323	0.755736	0.999844
ENSFDAG00000003771	ENSFDAG00000003771	-0.943393	-0.25398	0.11259	-0.110196	0.0343213	0.0417551	0.260797	1.2217	0.0319671	0.0156204	0.204016	0.21403	0.0323381	0.0423118	0.393376	0.155457	0.367666	0.807256	0.940862	0.816387	0.204847	0.838154	0.999844
ENSFDAG00000003772	CHCHD6	0.0152849	-0.22181	0.0115562	0.141523	0.0952274	-0.119071	-0.108641	0.076427	0.0177091	0.000847738	0.0197902	0.0253209	0.0171279	0.0222576	0.955908	0.095555	0.691439	0.314412	0.549545	0.362918	0.466486	0.737534	0.999844
ENSFDAG00000003773	SAMD9L	-0.107827	-0.205472	0.0169279	0.230755	0.0253441	-0.0705562	0.11029	0.077463	0.0179492	0.000859229	0.0200584	0.0256641	0.01736	0.0225593	0.698446	0.125112	0.563605	0.103248	0.874297	0.592304	0.462766	0.59474	0.999844
ENSFDAG00000003774	ENSFDAG00000003774	0.208633	-0.0526262	-0.0186071	-0.154097	0.098911	-0.0484024	0.00811492	0.0648497	0.0150265	0.00071932	0.0167923	0.0214852	0.0145333	0.018886	0.412629	0.667696	0.487825	0.234379	0.499803	0.688052	0.952913	0.708481	0.999844
ENSFDAG00000003783	TINF2	0.278208	0.00887974	-0.0339062	0.0222413	0.0709236	-0.0188162	0.0053185	0.034673	0.00803419	0.000384598	0.00897832	0.0114875	0.00777049	0.0100977	0.135156	0.921085	0.0838225	0.814421	0.508146	0.830972	0.95779	0.838154	0.999844
ENSFDAG00000003785	ENSFDAG00000003785	-0.13639	0.103073	0.0152112	-0.0563957	-0.141873	0.0250106	-0.0954238	0.0229657	0.00532145	0.000254738	0.00594679	0.00760872	0.00514679	0.00668822	0.368119	0.157666	0.340565	0.464587	0.103853	0.727372	0.243286	0.773947	0.999844
ENSFDAG00000003787	ENSFDAG00000003787	0.29721	0.1867	-0.0489149	-0.0266157	0.0140963	0.163151	0.02863	0.0535217	0.0124017	0.000593669	0.013859	0.0177322	0.0119946	0.0155869	0.1989	0.0936392	0.0446897	0.821136	0.915695	0.136305	0.81862	0.838154	0.999844
ENSFDAG00000003797	STAG1	0.125781	0.00277087	-0.0157721	-0.0548486	0.021878	-0.0481833	0.132176	0.0659689	0.0152858	0.000731735	0.0170821	0.021856	0.0147841	0.0192119	0.624335	0.98212	0.559852	0.674736	0.882353	0.691901	0.340284	0.82095	0.999844
ENSFDAG00000003799	SUCLG1	0.0328618	0.0743568	-0.00776345	-0.0630408	0.0276131	0.0369043	0.00641626	0.0182107	0.00421966	0.000201995	0.00471552	0.00603336	0.00408116	0.00530345	0.807605	0.252344	0.5849	0.358603	0.722218	0.563482	0.929793	0.743177	0.999844
ENSFDAG00000003801	CTU2	0.809305	-0.305183	-0.0865906	-0.124663	0.197282	0.257809	0.0999817	0.218119	0.0505409	0.0024194	0.0564802	0.0722645	0.048882	0.063522	0.0831189	0.174624	0.0783361	0.599894	0.463023	0.243588	0.691591	0.806406	0.999844
ENSFDAG00000003804	MMS19	0.29033	-0.0983316	-0.0339532	0.0564212	-0.0317235	0.114975	0.0579312	0.0969696	0.0224691	0.0010756	0.0251095	0.0321268	0.0217316	0.0282401	0.351161	0.511828	0.30054	0.721796	0.859517	0.435429	0.730297	0.826038	0.999844
ENSFDAG00000003807	C3	1.46755	-0.520271	-0.172134	1.44451	0.350478	0.124314	-0.401731	1.55037	0.171199	0.0188081	0.31334	0.375829	0.169685	0.222831	0.238547	0.208603	0.209426	0.00986424	0.567527	0.762815	0.394749	0.319031	0.999844
ENSFDAG00000003809	P2RY1	0.655085	-0.94079	-0.0141989	0.0712675	-0.231423	-0.315643	-0.1212	0.248806	0.0576517	0.00275979	0.0644265	0.0824316	0.0557594	0.0724591	0.189079	8.92e-05	0.786944	0.778883	0.420216	0.181317	0.652529	0.833353	0.999844
ENSFDAG00000003815	FASTKD2	-0.0938645	0.224633	-0.00346345	0.0633391	0.0383453	0.0413134	-0.0204939	0.0606963	0.0140641	0.000673251	0.0157168	0.0201092	0.0136025	0.0176764	0.703207	0.0582034	0.893813	0.613397	0.786848	0.723169	0.877496	0.808274	0.999844
ENSFDAG00000003816	TYW3	0.0260216	0.18591	-0.0156259	0.0173785	-0.00968296	0.0521972	0.0598264	0.0310733	0.00720009	0.000344669	0.00804619	0.0102948	0.00696376	0.00904937	0.882644	0.0284548	0.399972	0.84638	0.923971	0.531645	0.529413	0.839052	0.999844
ENSFDAG00000003818	RF00001	0.570027	-0.180106	-0.0601031	-0.0365162	0.313558	0.0285323	-0.0560298	0.437204	0.101306	0.00484952	0.113211	0.144849	0.0979807	0.127326	0.388637	0.571488	0.388097	0.913577	0.410012	0.927372	0.875227	0.853149	0.999844
ENSFDAG00000003819	CDK1	0.621301	0.0673716	-0.0794294	-0.159366	0.136412	0.0845694	0.150987	0.197338	0.0225029	0.00238787	0.0402194	0.0484116	0.0222839	0.0292621	0.161929	0.653349	0.104065	0.426815	0.535272	0.571038	0.377427	0.766288	0.999844
ENSFDAG00000003824	ENSFDAG00000003824	0.264248	-0.297293	-0.00674864	-0.166526	-0.164529	-0.140776	0.111121	0.168008	0.0389296	0.00186356	0.0435043	0.0556623	0.0376518	0.0489283	0.519132	0.131872	0.875772	0.424645	0.485573	0.468147	0.615415	0.765711	0.999844
ENSFDAG00000003827	ENSFDAG00000003827	1.02504	-0.193552	-0.108018	0.0125729	-0.172557	-0.112799	0.197206	0.559906	0.129738	0.00621055	0.144983	0.185501	0.125479	0.16306	0.170725	0.59102	0.17048	0.973659	0.688681	0.750156	0.62529	0.860841	0.999844
ENSFDAG00000003829	IL13RA2	0.191854	-0.0239232	0.00811053	-0.271854	-1.1876	-0.0743792	-0.20004	0.326491	0.0756522	0.00362148	0.0845423	0.108169	0.0731691	0.0950829	0.737048	0.930689	0.89279	0.349803	0.000305123	0.783338	0.516512	0.742925	0.368571
ENSFDAG00000003831	GDA	-0.11422	0.0361452	0.00750685	0.254359	0.426936	-0.125042	-0.257323	0.0799006	0.018514	0.000886267	0.0206896	0.0264717	0.0179063	0.0232692	0.686153	0.790513	0.800918	0.0770004	0.00868909	0.350076	0.0916235	0.562992	0.636505
ENSFDAG00000003835	POLH	0.0968875	-0.0957473	-0.0144897	-0.0420539	-0.0139055	0.0750803	0.333817	0.0319443	0.00740192	0.00035433	0.00827174	0.0105834	0.00715896	0.00930304	0.587757	0.265753	0.441444	0.643802	0.892479	0.374884	0.000538265	0.814561	0.999844
ENSFDAG00000003838	HAO2	-0.33163	0.145618	0.0303654	0.0463096	-0.192807	-0.0335009	0.154391	0.119459	0.0276802	0.00132505	0.030933	0.0395777	0.0267716	0.0347896	0.337307	0.381439	0.404176	0.792315	0.332462	0.837769	0.407814	0.836317	0.999844
ENSFDAG00000003839	SIPA1	0.737414	-0.596928	-0.0847002	0.911587	0.311744	-0.00407116	0.230599	0.360007	0.0834182	0.00399324	0.0932209	0.119273	0.0806802	0.104844	0.219067	0.0387562	0.180128	0.00282961	0.366703	0.988564	0.476357	0.207947	0.999844
ENSFDAG00000003843	DNLZ	0.219932	-0.101184	-0.024014	0.224468	0.0906869	0.0265118	-0.108197	0.136223	0.0315645	0.001511	0.0352738	0.0451316	0.0305285	0.0396717	0.551251	0.569001	0.536721	0.232021	0.669468	0.879396	0.586979	0.70828	0.999844
ENSFDAG00000003849	MTF2	0.194317	0.188353	-0.0343487	0.177866	0.0491721	-0.0154031	-0.107817	0.0435283	0.0100861	0.000482821	0.0112713	0.0144213	0.00975501	0.0126766	0.351659	0.0607265	0.118003	0.093865	0.682198	0.87607	0.338264	0.583018	0.999844
ENSFDAG00000003851	GREM1	-0.368305	0.189782	0.0481025	-0.562654	0.250876	-0.272032	-0.0354509	0.242564	0.0562052	0.00269054	0.06281	0.0803633	0.0543603	0.070641	0.454571	0.423414	0.35374	0.0247645	0.376171	0.24331	0.893891	0.416266	0.999844
ENSFDAG00000003852	RF00100	-0.537634	0.257328	0.0391967	-0.520038	-0.0780398	0.761125	0.161054	0.661541	0.153288	0.00733789	0.171301	0.219174	0.148256	0.192658	0.508605	0.511018	0.647256	0.208942	0.86761	0.0480712	0.713675	0.686614	0.999844
ENSFDAG00000003858	ATP23	-0.199191	0.0516914	0.0201413	-0.0762277	0.0748584	0.0574417	-0.0272164	0.0340221	0.00788335	0.000377377	0.00880975	0.0112718	0.0076246	0.00990813	0.280179	0.56044	0.299823	0.416711	0.480755	0.510643	0.784528	0.761235	0.999844
ENSFDAG00000003859	PSMB1	0.0488311	0.117041	-0.00904095	-0.0382135	0.0163502	-0.0160302	-0.0893612	0.0370045	0.00857443	0.000410459	0.00958204	0.0122599	0.00829299	0.0107767	0.799615	0.206244	0.655416	0.696255	0.882607	0.860271	0.389344	0.825038	0.999844
ENSFDAG00000003862	ENSFDAG00000003862	-0.0977226	0.0750844	0.0103999	-0.0502886	-0.0759801	0.0191133	-0.0480031	0.0535153	0.0124002	0.000593598	0.0138574	0.01773	0.0119932	0.0155851	0.67271	0.500138	0.669482	0.669235	0.568259	0.861449	0.700596	0.818781	0.999844
ENSFDAG00000003864	ENSFDAG00000003864	0.106885	0.0435204	9.05e-05	-0.363639	0.0458183	-0.164905	-0.0955279	0.131781	0.0305353	0.00146173	0.0341236	0.0436601	0.0295331	0.0383781	0.768424	0.80332	0.998111	0.0490067	0.826433	0.337269	0.625813	0.498478	0.999844
ENSFDAG00000003867	PAPSS1	0.295033	-0.170156	-0.0336177	0.125823	0.0883547	0.159223	0.0456958	0.191148	0.0442914	0.00212023	0.0494962	0.0633288	0.0428376	0.0556673	0.499792	0.418795	0.465335	0.571696	0.725514	0.441718	0.846429	0.803242	0.999844
ENSFDAG00000003871	GPATCH1	0.312783	-0.0156979	-0.0396191	-0.082569	0.0293416	0.145002	0.0564491	0.0904689	0.0209628	0.00100349	0.0234262	0.0299731	0.0202748	0.026347	0.298384	0.913661	0.211049	0.589564	0.865419	0.308513	0.728013	0.804754	0.999844
ENSFDAG00000003874	CD27	1.04372	-0.368413	-0.11854	0.355344	-0.214255	0.525584	-0.116889	1.16614	0.270211	0.012935	0.301964	0.386353	0.261341	0.339612	0.333787	0.478489	0.297287	0.517856	0.730321	0.303899	0.841028	0.789669	0.999844
ENSFDAG00000003876	PDIK1L	0.0747984	-0.0367893	-0.00362221	0.00832587	0.189993	-0.104315	-0.169301	0.063421	0.0146955	0.000703474	0.0164224	0.0210119	0.0142131	0.0184699	0.766457	0.761524	0.891372	0.948198	0.189957	0.381581	0.21286	0.859335	0.999844
ENSFDAG00000003880	ENSFDAG00000003880	-1.43893	0.830963	0.131867	0.385493	0.505531	0.139476	-0.361897	0.648843	0.022488	0.00825429	0.109799	0.117465	0.022715	0.029744	0.0740394	3e-08	0.146659	0.244679	0.140212	0.354744	0.0358709	0.713772	0.999844
ENSFDAG00000003882	ANKFY1	0.135149	-0.0567005	-0.0174636	-0.0921743	0.078981	0.0235762	0.221258	0.0854482	0.0197994	0.000947801	0.0221261	0.0283097	0.0191496	0.0248848	0.643837	0.686979	0.570544	0.535478	0.638774	0.864719	0.160738	0.792036	0.999844
ENSFDAG00000003887	COL4A3BP	0.272783	-0.0525282	-0.0223377	0.288105	-0.198989	-0.273247	-0.206221	0.146411	0.0339252	0.001624	0.0379119	0.048507	0.0328117	0.0426386	0.475905	0.7755	0.579374	0.138963	0.366263	0.13143	0.317944	0.635799	0.999844
ENSFDAG00000003889	DPEP1	0.444811	-1.11454	0.00619748	0.137116	-0.855653	0.0966322	0.288336	0.350402	0.0811927	0.0038867	0.0907338	0.116091	0.0785277	0.102046	0.45239	9.17e-05	0.920814	0.648965	0.0120288	0.730219	0.366734	0.815058	0.72493
ENSFDAG00000003895	SCAF11	-0.0683616	0.0792801	0.00700022	-0.0397884	-0.00226973	-0.115541	0.0320461	0.0512391	0.0118728	0.00056835	0.013268	0.0169759	0.0114831	0.0149222	0.76265	0.466863	0.769039	0.729775	0.986101	0.280936	0.793062	0.826388	0.999844
ENSFDAG00000003897	RF00100	-0.510234	-0.412454	0.0804812	-0.156115	0.182251	-0.354189	0.4463	0.384725	0.0891459	0.00426742	0.0996217	0.127463	0.0862198	0.112042	0.41073	0.16715	0.217948	0.620872	0.609716	0.227728	0.182425	0.808807	0.999844
ENSFDAG00000003899	RF00026	0.645773	-0.383043	-0.0363467	-0.573796	-0.473009	-0.398413	0.484984	0.583394	0.13518	0.00647108	0.151065	0.193283	0.130743	0.1699	0.397848	0.297497	0.65139	0.139863	0.281972	0.270525	0.239353	0.635799	0.999844
ENSFDAG00000003901	AASDH	-0.141112	0.0145615	0.0185057	-0.108582	-0.0200053	-0.114452	0.109993	0.0804192	0.0186342	0.000892019	0.0208239	0.0266435	0.0180225	0.0234202	0.618762	0.915049	0.535516	0.451782	0.902456	0.393915	0.472305	0.770408	0.999844
ENSFDAG00000003904	STK10	0.0928922	-0.340599	0.0051684	0.225728	-0.152844	0.0570779	-0.118099	0.0861481	0.0199616	0.000955565	0.0223074	0.0285415	0.0193064	0.0250886	0.751633	0.0159215	0.867216	0.130702	0.365618	0.681229	0.455906	0.628259	0.999844
ENSFDAG00000003906	SLU7	-0.0574294	0.23077	-0.00116321	0.0215868	-0.0362686	-0.070414	-0.117539	0.031757	0.00735851	0.000352252	0.00822323	0.0105214	0.00711698	0.00924849	0.747251	0.00714105	0.950581	0.811843	0.723649	0.403908	0.221628	0.838154	0.999844
ENSFDAG00000003907	RF02110	0.999673	0.597905	-0.158855	0.0953973	0.271707	0.373533	-0.190982	0.565426	0.131016	0.00627177	0.146413	0.18733	0.126716	0.164667	0.183701	0.098566	0.0448689	0.803118	0.530159	0.294026	0.637897	0.837953	0.999844
ENSFDAG00000003913	INPP5B	0.343084	-0.148863	-0.0333074	0.0169652	-0.0689695	0.00470917	0.0626565	0.0408259	0.0094599	0.000452846	0.0105716	0.013526	0.00914939	0.0118896	0.089512	0.125885	0.117539	0.868942	0.553164	0.960734	0.565547	0.843229	0.999844
ENSFDAG00000003914	HDGFL2	0.184678	-0.267964	-0.0116898	0.23524	0.0776186	-0.128518	0.0889006	0.261111	0.0605028	0.00289628	0.0676127	0.0865082	0.058517	0.0760425	0.717792	0.275976	0.828042	0.365633	0.791858	0.595226	0.74716	0.744426	0.999844
ENSFDAG00000003915	WWP1	-0.0771714	0.201787	-0.00270237	0.00809792	0.165933	-0.0639767	-0.00666969	0.0678885	0.0157306	0.000753027	0.0175792	0.022492	0.0152143	0.0197709	0.767091	0.107646	0.921553	0.951298	0.268547	0.603987	0.962167	0.859848	0.999844
ENSFDAG00000003916	RUVBL2	0.232423	-0.0802529	-0.0223672	-0.0772202	-0.100479	-0.0109175	0.14436	0.0811813	0.0188108	0.000900473	0.0210213	0.026896	0.0181933	0.0236422	0.414649	0.558456	0.456043	0.59431	0.540089	0.935489	0.347801	0.805944	0.999844
ENSFDAG00000003919	CPSF7	0.838275	-0.21729	-0.0970567	0.278031	-0.270693	0.489592	-0.142147	0.714152	0.165478	0.00792145	0.184924	0.236604	0.160047	0.20798	0.32122	0.593233	0.275496	0.517929	0.577869	0.221027	0.755273	0.789669	0.999844
ENSFDAG00000003921	INVS	0.063602	0.117392	-0.00998605	-0.0198655	-0.185378	-0.0856799	0.0767848	0.0256015	0.0059322	0.000283975	0.00662931	0.00848199	0.00573749	0.00745584	0.690998	0.127469	0.553456	0.807241	0.0441313	0.257995	0.373866	0.838154	0.999844
ENSFDAG00000003923	C7orf50	0.423576	0.00380149	-0.0465499	-0.0317898	0.0133114	-0.0224933	-0.0560375	0.0760252	0.017616	0.00084328	0.0196861	0.0251878	0.0170378	0.0221406	0.124485	0.97715	0.108935	0.820756	0.933156	0.863183	0.706468	0.838154	0.999844
ENSFDAG00000003924	ZNF263	0.457887	-0.104538	-0.053566	0.154226	0.150323	0.0914247	-0.0941227	0.101168	0.0234418	0.00112216	0.0261966	0.0335176	0.0226724	0.0294627	0.149985	0.494747	0.10981	0.340653	0.411597	0.543734	0.583451	0.742729	0.999844
ENSFDAG00000003928	ENSFDAG00000003928	0.133453	-0.167897	-0.0114659	0.034161	0.029217	0.113241	0.0436176	0.133029	0.0308244	0.00147557	0.0344467	0.0440734	0.0298127	0.0387414	0.714445	0.338919	0.76533	0.853967	0.889315	0.51192	0.824624	0.840778	0.999844
ENSFDAG00000003930	RF00276	-0.397509	0.0333892	0.0525361	-0.264109	0.196829	0.0422167	-0.306795	0.435916	0.101007	0.00483523	0.112877	0.144422	0.097692	0.12695	0.547129	0.91633	0.449934	0.431806	0.604506	0.892558	0.389208	0.766288	0.999844
ENSFDAG00000003931	RGL2	0.525232	-0.106363	-0.0606303	0.388451	-0.0340153	0.0777941	-0.199015	0.175213	0.0405992	0.00194349	0.0453701	0.0580495	0.0392666	0.0510268	0.209558	0.597585	0.169037	0.0681986	0.887727	0.694625	0.378305	0.547681	0.999844
ENSFDAG00000003933	TIAL1	0.00686901	-0.0171036	-0.00483827	0.073672	0.0173629	0.0353603	0.0877508	0.038659	0.00895779	0.00042881	0.0100104	0.012808	0.00866377	0.0112585	0.972131	0.856594	0.81526	0.461527	0.878067	0.704024	0.408232	0.772568	0.999844
ENSFDAG00000003935	LACTB2	-0.317089	0.335458	0.0188585	0.288949	0.00526102	-0.000366147	-0.290504	0.0569485	0.0131957	0.000631679	0.0147464	0.0188675	0.0127626	0.0165849	0.183934	0.00349736	0.453049	0.017338	0.969447	0.997414	0.0240848	0.378063	0.999844
ENSFDAG00000003940	PJA1	-0.192258	-0.0288579	0.0255664	-0.107689	-0.0219573	-0.066724	0.129812	0.0207629	0.00481103	0.000230305	0.00537639	0.00687892	0.00465312	0.00604671	0.182119	0.677373	0.0920491	0.141922	0.791211	0.327995	0.095043	0.637301	0.999844
ENSFDAG00000003950	MYO19	0.29658	-0.238496	-0.0265617	-0.136859	0.00634865	0.210137	0.124954	0.0836677	0.0193869	0.000928052	0.0216651	0.0277198	0.0187506	0.0243663	0.305209	0.0867349	0.383259	0.352471	0.969583	0.124882	0.423428	0.742973	0.999844
ENSFDAG00000003954	PEX12	-0.111039	0.104179	0.00616344	-0.0271866	0.0564787	0.0391341	-0.00372408	0.0218659	0.00506661	0.000242539	0.005662	0.00724434	0.00490031	0.00636793	0.452704	0.143305	0.692282	0.717874	0.506967	0.576134	0.962778	0.826038	0.999844
ENSFDAG00000003958	CHCHD5	0.137362	-0.059321	-0.00712633	-0.124736	-0.0246254	-0.0442607	-0.0603837	0.0531426	0.0123138	0.000589464	0.0137609	0.0176066	0.0119097	0.0154765	0.551269	0.592941	0.769125	0.287631	0.852769	0.685057	0.627406	0.728455	0.999844
ENSFDAG00000003960	MAP3K5	-0.155085	-0.123605	0.0204076	0.253254	-0.300777	0.041968	0.10988	0.0880231	0.0203961	0.000976363	0.0227929	0.0291628	0.0197266	0.0256347	0.601168	0.38677	0.513686	0.0934488	0.0781895	0.765087	0.492534	0.582397	0.999844
ENSFDAG00000003968	ENSFDAG00000003968	0.184761	0.171038	-0.0275903	-0.168405	0.0714127	-0.0152885	0.0386359	0.0560565	0.012989	0.000621785	0.0145154	0.018572	0.0125627	0.0163252	0.435177	0.133423	0.268527	0.162177	0.600266	0.891503	0.762358	0.652414	0.999844
ENSFDAG00000003969	PI4KB	0.311914	-0.233839	-0.0290008	0.146636	-0.0257218	0.00886044	0.089665	0.179448	0.0415805	0.00199046	0.0464667	0.0594526	0.0402157	0.0522601	0.461537	0.251481	0.515673	0.496345	0.915986	0.964758	0.69489	0.784754	0.999844
ENSFDAG00000003971	ENSFDAG00000003971	-0.424797	0.0683444	0.0487653	0.111721	-0.207617	0.0500995	-0.14751	0.105052	0.0243419	0.00116525	0.0272023	0.0348045	0.0235429	0.0305939	0.189983	0.661348	0.153128	0.498166	0.265764	0.744035	0.399035	0.784754	0.999844
ENSFDAG00000003972	UTP25	0.309242	-0.175339	-0.0341878	-0.0134558	0.0431444	0.0880333	0.233636	0.0917146	0.0212515	0.00101731	0.0237488	0.0303858	0.0205539	0.0267097	0.307195	0.229063	0.283776	0.930421	0.804515	0.539186	0.15284	0.855734	0.999844
ENSFDAG00000003973	CMC1	0.0351606	0.321257	-0.0131955	-0.103551	-0.0453516	-0.00452092	-0.211497	0.0356124	0.00825186	0.000395017	0.00922155	0.0117987	0.007981	0.0103713	0.852195	0.000405435	0.506739	0.280885	0.676299	0.95964	0.037823	0.727325	0.999844
ENSFDAG00000003974	ZNF574	0.757228	-0.183889	-0.0903761	0.343646	0.243087	0.0988605	-0.0498603	0.555783	0.128782	0.00616481	0.143916	0.184135	0.124555	0.161859	0.309763	0.608355	0.249712	0.365014	0.571059	0.779387	0.901368	0.744426	0.999844
ENSFDAG00000003975	ENSFDAG00000003975	1.10125	-1.65526	-0.078442	1.32284	0.500465	-0.130818	0.77676	1.48659	0.180018	0.0178975	0.307951	0.373125	0.177961	0.233656	0.366411	9.57e-05	0.557645	0.0171361	0.412611	0.756483	0.108068	0.378063	0.999844
ENSFDAG00000003976	SFT2D2	0.730652	-0.125764	-0.0828449	0.190844	0.0269845	0.111509	-0.0810786	0.277699	0.0643465	0.00308027	0.0719081	0.092004	0.0622345	0.0808734	0.165591	0.620046	0.135517	0.476659	0.929111	0.654886	0.775564	0.777446	0.999844
ENSFDAG00000003982	SLC35A2	-0.207825	0.00555194	0.0219002	-0.077142	-0.0423928	0.0240223	0.161143	0.114906	0.0266251	0.00127455	0.0297539	0.0380691	0.0257512	0.0334636	0.539813	0.972857	0.539588	0.654718	0.827996	0.881003	0.378374	0.816724	0.999844
ENSFDAG00000003984	DMC1	-3.08069	1.36147	0.336878	-0.838367	-1.62058	0.0344953	-0.42736	1.31579	0.146947	0.0159482	0.266709	0.320298	0.145602	0.191203	0.00723815	0.000382868	0.00763996	0.104512	0.00419017	0.927968	0.3284	0.597167	0.539758
ENSFDAG00000003985	ENSFDAG00000003985	0.0491741	0.100253	-0.00569866	-0.0940311	-0.100787	-0.0338897	-0.0419954	0.0174913	0.00405296	0.000194016	0.00452924	0.00579501	0.00391993	0.00509394	0.710032	0.115316	0.682449	0.162353	0.185515	0.588309	0.556262	0.652805	0.999844
ENSFDAG00000003987	PTPRF	-0.228683	-0.430704	0.0495772	-0.276277	0.311762	-0.109217	0.159513	0.161446	0.0374091	0.00179078	0.0418052	0.0534884	0.0361813	0.0470174	0.56926	0.0259578	0.241377	0.176621	0.177655	0.565846	0.461948	0.667121	0.999844
ENSFDAG00000003988	STRN	0.0124902	-0.0177513	0.00841299	-0.126506	0.0067976	-0.17423	-0.0841299	0.120883	0.0280102	0.00134085	0.0313017	0.0400495	0.0270908	0.0352043	0.971343	0.915531	0.818284	0.474587	0.972903	0.289804	0.653874	0.777212	0.999844
ENSFDAG00000003989	ENSFDAG00000003989	-0.173389	0.146375	0.00677851	0.0336183	-0.0220602	0.332785	-0.133569	0.192266	0.0445505	0.00213264	0.0497857	0.0636992	0.0430882	0.0559929	0.692526	0.488001	0.883303	0.880237	0.930349	0.108893	0.572437	0.844215	0.999844
ENSFDAG00000003992	ENSFDAG00000003992	-0.300993	0.332298	0.0190419	-0.0101299	0.447283	-0.0526989	-0.316703	0.139601	0.0323474	0.00154847	0.0361486	0.046251	0.0312857	0.0406556	0.420481	0.0646603	0.628454	0.957509	0.0375438	0.765749	0.116253	0.860841	0.985012
ENSFDAG00000004001	ENSFDAG00000004001	0.0970246	-0.432571	0.00493296	0.11075	0.018442	0.0884315	0.0562055	0.26958	0.0624652	0.00299021	0.0698056	0.089314	0.0604149	0.0785089	0.851763	0.0834932	0.92812	0.675085	0.950795	0.719013	0.841015	0.82095	0.999844
ENSFDAG00000004002	MTMR12	0.431781	-0.29142	-0.0455216	0.179903	0.0979665	0.0969423	0.101688	0.0748845	0.0173517	0.000830627	0.0193907	0.0248098	0.0167822	0.0218083	0.114598	0.0269444	0.114225	0.196378	0.533965	0.454265	0.491085	0.678929	0.999844
ENSFDAG00000004010	MRPS7	0.170512	-0.0403091	-0.0170448	-0.0810989	0.00742787	-0.0168016	0.0689076	0.014992	0.00347383	0.000166293	0.00388205	0.00496696	0.00335981	0.00436606	0.163743	0.494033	0.186245	0.193047	0.916063	0.771921	0.297018	0.678089	0.999844
ENSFDAG00000004015	ZNF655	-0.153858	-0.0241349	0.0226812	-0.0351834	-0.0669599	-0.065625	-0.0023113	0.0517108	0.0119821	0.000573583	0.0133901	0.0171322	0.0115888	0.0150596	0.498664	0.825493	0.34362	0.761089	0.608949	0.542122	0.984973	0.831509	0.999844
ENSFDAG00000004016	SPECC1	0.671325	-0.548215	-0.0450041	-0.172702	0.0497339	-0.0712083	0.0189096	0.119796	0.0277583	0.00132879	0.0310202	0.0396894	0.0268472	0.0348878	0.0524285	0.0010003	0.216982	0.326808	0.802865	0.663859	0.919361	0.74009	0.999844
ENSFDAG00000004017	PTRHD1	0.423241	0.0245211	-0.0413219	-0.277996	-0.167645	-0.0143369	0.0285914	0.0909078	0.0210645	0.00100836	0.0235399	0.0301185	0.0203731	0.0264748	0.160396	0.865834	0.19316	0.07	0.334048	0.919991	0.860515	0.551469	0.999844
ENSFDAG00000004018	RF00003	-0.239603	0.418956	0.00793957	-0.000524754	-0.306311	0.793983	-0.833978	0.727587	0.168591	0.00807048	0.188403	0.241056	0.163058	0.211893	0.778788	0.30756	0.929576	0.999035	0.532704	0.0492688	0.0700261	0.862948	0.999844
ENSFDAG00000004020	E2F4	0.345151	-0.297264	-0.0357118	0.0686055	0.319983	0.0566231	0.171649	0.161017	0.0373098	0.00178602	0.0416942	0.0533463	0.0360852	0.0468925	0.389708	0.123811	0.398098	0.736881	0.165931	0.765644	0.427973	0.827669	0.999844
ENSFDAG00000004025	RF00612	0.813855	-0.997505	-0.0558571	-0.844928	0.918589	0.650179	0.110798	0.596045	0.138111	0.0066114	0.154341	0.197474	0.133578	0.173584	0.291809	0.00727228	0.492108	0.0315003	0.0387227	0.0752467	0.790288	0.447963	0.995897
ENSFDAG00000004026	DENND4A	0.178305	-0.546996	0.00193283	0.100172	0.0475246	-0.0131342	0.136798	0.0891296	0.0206525	0.000988637	0.0230794	0.0295294	0.0199746	0.0259569	0.550344	0.000141088	0.950983	0.509655	0.782117	0.925958	0.39583	0.788268	0.999844
ENSFDAG00000004039	MEDAG	0.687077	-0.297015	-0.0550718	-0.582924	0.503906	-0.206326	0.0325956	0.23136	0.0536091	0.00256627	0.0599088	0.0766514	0.0518495	0.0673781	0.153166	0.199562	0.276983	0.0172382	0.0687474	0.364877	0.900069	0.378063	0.999844
ENSFDAG00000004040	NUF2	0.48429	0.165435	-0.0676732	-0.195733	0.0676221	0.0969107	0.172354	0.165888	0.0384384	0.00184005	0.0429554	0.05496	0.0371767	0.0483109	0.234422	0.398776	0.114653	0.344965	0.773005	0.615234	0.432953	0.742729	0.999844
ENSFDAG00000004047	RF01976	-0.855132	0.930557	0.0488813	-0.00178753	-0.0646383	0.119502	-0.0686547	0.24332	0.0563804	0.00269893	0.0630058	0.0806138	0.0545298	0.0708612	0.0829923	8.89e-05	0.346753	0.994318	0.819911	0.608826	0.796477	0.861857	0.999844
ENSFDAG00000004053	ENSFDAG00000004053	0.278567	-0.205297	-0.0263102	-0.183047	0.0261635	0.311006	0.0738378	0.416709	0.0965569	0.00462219	0.107904	0.138059	0.0933877	0.121357	0.666082	0.508818	0.698763	0.577362	0.943864	0.308815	0.832141	0.803968	0.999844
ENSFDAG00000004056	ENSFDAG00000004056	0.53253	-0.0584447	-0.0651184	-0.136774	0.114585	0.245303	0.11472	0.235097	0.054475	0.00260772	0.0608765	0.0778895	0.052687	0.0684665	0.272074	0.802273	0.202244	0.579344	0.681387	0.28521	0.661075	0.804309	0.999844
ENSFDAG00000004062	EWSR1	0.340731	-0.190481	-0.0329836	0.0184065	0.0036172	-0.0167777	0.153239	0.0329692	0.0076394	0.000365698	0.00853712	0.010923	0.00738865	0.00960151	0.0605818	0.0293072	0.0845647	0.842097	0.972391	0.845247	0.11785	0.838952	0.999844
ENSFDAG00000004071	LTN1	-0.180586	0.00252448	0.0214775	-0.00422966	0.0529539	-0.0979338	0.0390867	0.0416067	0.00964081	0.000461507	0.0107737	0.0137846	0.00932437	0.012117	0.375983	0.979488	0.317427	0.967496	0.651972	0.310488	0.722527	0.860841	0.999844
ENSFDAG00000004078	RF00377	-0.261202	-0.117487	0.0241526	-0.186305	-0.229151	0.610667	0.24167	0.870363	0.201674	0.00965417	0.225374	0.288358	0.195055	0.253473	0.779493	0.793617	0.805826	0.694733	0.669574	0.166759	0.631215	0.824523	0.999844
ENSFDAG00000004079	ENSFDAG00000004079	-0.503833	0.0964761	0.0616435	-0.303584	-0.0460486	-0.0810263	0.087017	0.0749284	0.0173619	0.000831115	0.0194021	0.0248244	0.016792	0.0218212	0.0656776	0.464055	0.0324973	0.0292958	0.770084	0.531788	0.555816	0.437586	0.999844
ENSFDAG00000004081	ENSFDAG00000004081	-0.0771116	0.340091	-0.00313937	0.0520868	-0.171114	0.13224	-0.32897	0.0842689	0.0195262	0.000934721	0.0218208	0.027919	0.0188853	0.0245414	0.79052	0.014941	0.918214	0.724382	0.305795	0.335908	0.0357343	0.826038	0.999844
ENSFDAG00000004086	ERO1A	-0.628161	0.110766	0.0806456	-0.253474	-0.348517	-0.124683	0.048002	0.163129	0.0377992	0.00180945	0.0422411	0.0540461	0.0365585	0.0475076	0.119883	0.568864	0.0579781	0.217468	0.133838	0.514337	0.825692	0.696269	0.999844
ENSFDAG00000004088	MIR101-1	0.484328	0.0918961	-0.0580852	0.37817	-0.249071	-0.419218	0.124816	0.888348	0.205842	0.00985366	0.230031	0.294317	0.199085	0.258711	0.607347	0.839487	0.558447	0.430413	0.646156	0.347448	0.806151	0.766288	0.999844
ENSFDAG00000004091	RF00581	0.80895	0.400858	-0.128556	0.757637	0.398614	-0.0959213	-0.336537	0.699566	0.162099	0.00775967	0.181147	0.231772	0.156778	0.203732	0.333454	0.319427	0.144459	0.075059	0.407679	0.808583	0.455912	0.560924	0.999844
ENSFDAG00000004092	RF00377	-0.736408	-0.0325351	0.0951654	-0.503317	-0.429532	0.502258	-0.122081	0.603649	0.139873	0.00669574	0.15631	0.199994	0.135282	0.175799	0.343221	0.930677	0.24483	0.202997	0.336815	0.172081	0.770924	0.68117	0.999844
ENSFDAG00000004093	ENSFDAG00000004093	0.144632	-0.000815121	-0.0100339	-0.170201	-0.0861609	-0.113746	0.0544752	0.0559439	0.0129629	0.000620537	0.0144862	0.0185347	0.0125375	0.0162924	0.540877	0.994288	0.687098	0.15733	0.526816	0.309698	0.669537	0.648382	0.999844
ENSFDAG00000004094	ARMC7	0.518179	-0.365168	-0.0449942	-0.115004	-0.0514192	-0.00536136	0.342848	0.135807	0.0314681	0.00150638	0.035166	0.0449938	0.0304353	0.0395505	0.159692	0.0395393	0.246342	0.5397	0.808463	0.975483	0.0847159	0.792978	0.999844
ENSFDAG00000004095	PLD5	-1.25876	-1.04774	0.213902	-0.256468	-0.387602	-0.279713	0.228395	0.320051	0.0741599	0.00355004	0.0828746	0.106035	0.0717257	0.0932072	0.0260801	0.000119377	0.000330628	0.37299	0.233924	0.296291	0.454398	0.747591	0.999844
ENSFDAG00000004097	CALU	-0.477105	-0.0665803	0.0720163	-0.34136	-0.00670278	-0.244732	0.0551658	0.170589	0.0395277	0.00189219	0.0441727	0.0565175	0.0382303	0.0496801	0.248029	0.737712	0.0978087	0.104336	0.977507	0.210693	0.80452	0.597089	0.999844
ENSFDAG00000004100	AVPI1	0.0814848	-0.276406	-0.000143572	0.0823052	0.288199	-0.120601	0.0961241	0.0853734	0.0197821	0.000946971	0.0221068	0.0282849	0.0191328	0.024863	0.780338	0.0493891	0.996277	0.57988	0.0865981	0.383268	0.542117	0.804309	0.999844
ENSFDAG00000004110	RF00581	-0.205771	0.466254	-0.0289326	0.519448	0.104627	0.459113	0.284323	0.515362	0.119416	0.00571645	0.133449	0.170744	0.115496	0.150087	0.774392	0.177258	0.701965	0.155041	0.800111	0.176715	0.463006	0.648382	0.999844
ENSFDAG00000004114	RMND5B	0.0590524	-0.0676063	0.000394129	-0.157059	0.0749881	-0.0592246	0.0215481	0.0584476	0.0135431	0.000648308	0.0151346	0.0193642	0.0130986	0.0170215	0.807029	0.561284	0.98765	0.201719	0.589969	0.604824	0.868817	0.68117	0.999844
ENSFDAG00000004115	MRPS5	0.121979	0.00489529	-0.0130266	-0.0157129	-0.00720168	-0.0527655	0.0241923	0.0439135	0.0101753	0.000487093	0.0113711	0.0145489	0.00984134	0.0127888	0.560511	0.961294	0.555032	0.882854	0.95239	0.594801	0.830605	0.844995	0.999844
ENSFDAG00000004117	BAG4	0.303585	-0.173522	-0.0341578	0.0957039	0.252054	0.0295603	0.0465045	0.0689395	0.0159742	0.000764685	0.0178513	0.0228402	0.0154499	0.020077	0.247585	0.169777	0.216744	0.473807	0.0953556	0.812022	0.742757	0.776658	0.999844
ENSFDAG00000004122	MTMR7	-1.21456	0.173296	0.121051	-0.32727	-0.133797	0.391178	0.529953	0.192378	0.0445766	0.00213388	0.0498149	0.0637365	0.0431134	0.0560257	0.00562098	0.411762	0.00878033	0.142563	0.596132	0.0595725	0.0251593	0.637301	0.999844
ENSFDAG00000004123	BRMS1L	-0.567374	0.177646	0.0619923	-0.157684	0.0290479	-0.064054	-0.0434808	0.114401	0.0265082	0.00126895	0.0296232	0.0379019	0.0256381	0.0333166	0.0934507	0.275229	0.081812	0.359582	0.881392	0.689127	0.811715	0.743177	0.999844
ENSFDAG00000004129	COL1A1	-0.350928	-0.500562	0.0642918	-0.236026	0.381987	-0.114669	0.248578	0.337992	0.0783172	0.00374905	0.0875204	0.111979	0.0757466	0.0984323	0.546096	0.0736686	0.293712	0.424974	0.253659	0.676939	0.428181	0.765711	0.999844
ENSFDAG00000004130	MAST4	-0.085138	0.214364	0.0123806	-0.370902	0.0241147	-0.221303	-0.00171082	0.0981442	0.0227413	0.00108863	0.0254137	0.032516	0.0219948	0.0285822	0.785804	0.155173	0.707486	0.0199854	0.893615	0.135648	0.991926	0.389178	0.999844
ENSFDAG00000004135	TAF4B	-0.176366	0.0234672	0.0222059	-0.298484	0.303401	-0.123155	0.0907419	0.0902119	0.0209033	0.00100064	0.0233597	0.0298879	0.0202172	0.0262721	0.557072	0.871059	0.482686	0.0508276	0.0792645	0.386411	0.575592	0.50063	0.999844
ENSFDAG00000004142	RF00272	-0.749459	0.274532	0.0499458	0.409229	-0.124876	0.371706	0.301816	0.181793	0.0421237	0.00201646	0.0470738	0.0602293	0.0407411	0.0529428	0.0787882	0.181023	0.266029	0.059274	0.610869	0.065541	0.189617	0.525153	0.999844
ENSFDAG00000004148	HSBP1L1	-0.579786	0.10581	0.0709821	-0.0132427	-0.0771585	-0.147498	-0.170935	0.0869126	0.0201388	0.000964045	0.0225053	0.0287948	0.0194778	0.0253113	0.049224	0.455904	0.0222468	0.929659	0.649324	0.290577	0.282634	0.855734	0.999844
ENSFDAG00000004154	DDHD2	-0.157575	-0.194617	0.0273719	-0.134263	0.0430134	0.030326	0.125437	0.0231303	0.00535958	0.000256564	0.0059894	0.00766324	0.00518366	0.00673615	0.300162	0.0078521	0.0874764	0.0827663	0.623174	0.673603	0.126427	0.568306	0.999844
ENSFDAG00000004157	ANKRD27	0.858729	-0.303882	-0.0933233	0.0692574	-0.101492	0.243177	0.149484	0.223285	0.051738	0.0024767	0.0578179	0.0739761	0.0500398	0.0650266	0.0691715	0.181555	0.060762	0.773325	0.709037	0.276998	0.557739	0.832796	0.999844
ENSFDAG00000004161	NADK2	0.0139282	0.449845	-0.0286995	0.11835	0.0324212	0.0945606	-0.0602628	0.063067	0.0146134	0.000699546	0.0163307	0.0208946	0.0141338	0.0183668	0.955771	0.000198255	0.277881	0.354385	0.822531	0.426386	0.656562	0.743177	0.999844
ENSFDAG00000004164	CREB3	-0.18271	-0.0148048	0.0301862	0.00409449	-0.260186	-0.0710107	-0.126049	0.043224	0.0100156	0.000479446	0.0111925	0.0143205	0.00968683	0.012588	0.379499	0.882396	0.168018	0.969128	0.0296877	0.470605	0.261239	0.860841	0.922231
ENSFDAG00000004165	TOMM70	-0.338358	-0.0304266	0.0429008	0.0351595	0.0913888	-0.179071	0.0148749	0.0278146	0.006445	0.000308522	0.00720236	0.00921519	0.00623345	0.00810034	0.042478	0.704686	0.0145888	0.678662	0.341093	0.0233238	0.868729	0.821287	0.999844
ENSFDAG00000004166	RF00003	-0.0672571	0.425943	-0.0143855	0.053789	0.21533	0.370768	-0.631789	0.780751	0.18091	0.00866019	0.202169	0.258669	0.174972	0.227376	0.939326	0.31662	0.87715	0.904777	0.672017	0.375415	0.185187	0.851178	0.999844
ENSFDAG00000004171	VCL	1.06447	-0.141401	-0.12004	0.131498	-0.116466	0.123895	0.118456	0.381173	0.0883227	0.00422801	0.0987017	0.126286	0.0854237	0.111008	0.0846836	0.634224	0.0648762	0.675538	0.743113	0.671638	0.722191	0.821157	0.999844
ENSFDAG00000004173	TMEM68	-0.407683	0.147384	0.0464901	-0.0783597	-0.0595091	-0.196581	0.0374605	0.0890412	0.020632	0.000987655	0.0230565	0.0295001	0.0199548	0.0259312	0.171863	0.304857	0.139058	0.605816	0.728986	0.164041	0.81605	0.806512	0.999844
ENSFDAG00000004178	ADSS	-0.252349	0.00807063	0.0336692	-0.0746999	0.0846506	-0.158147	-0.012284	0.060916	0.014115	0.000675688	0.0157737	0.020182	0.0136517	0.0177404	0.306575	0.945841	0.195228	0.551994	0.551265	0.175886	0.926518	0.795784	0.999844
ENSFDAG00000004179	SEMA4G	0.0336087	-0.150315	-0.00316679	0.0538193	0.0668516	-0.0409618	0.244402	0.229799	0.0532475	0.00254896	0.0595048	0.0761344	0.0514998	0.0669237	0.944107	0.514785	0.949986	0.825381	0.808562	0.85676	0.344789	0.838154	0.999844
ENSFDAG00000004181	IRF1	1.18037	-0.498322	-0.107874	0.159602	0.158534	-0.117936	-0.332673	0.586084	0.135803	0.00650091	0.151762	0.194174	0.131346	0.170683	0.123112	0.176297	0.180922	0.682032	0.719018	0.744866	0.420684	0.82139	0.999844
ENSFDAG00000004182	EIPR1	0.170178	-0.0156344	-0.0184457	-0.0151738	-0.0272216	0.00213873	0.00728665	0.0392605	0.00909717	0.000435482	0.0101662	0.0130073	0.00879857	0.0114337	0.390415	0.869796	0.376742	0.880376	0.811352	0.981809	0.94567	0.844215	0.999844
ENSFDAG00000004187	PCF11	0.412627	-0.203621	-0.0514572	0.261053	0.3005	0.09858	-0.0040725	0.243925	0.00678254	0.00311564	0.0408163	0.042988	0.00685959	0.00897666	0.403454	0.0134191	0.356593	0.196306	0.147242	0.233947	0.965714	0.678929	0.999844
ENSFDAG00000004192	GALNS	-0.152114	0.0829778	0.00450177	0.191351	0.135625	0.0336559	0.0781842	0.320031	0.0741554	0.00354982	0.0828696	0.106029	0.0717214	0.0932016	0.788015	0.760585	0.939771	0.506236	0.677035	0.899992	0.797875	0.787345	0.999844
ENSFDAG00000004194	ENSFDAG00000004194	-0.499612	0.581312	0.036777	0.294594	0.0218937	-0.364467	-0.317869	0.541838	0.125551	0.00601013	0.140305	0.179515	0.12143	0.157798	0.497308	0.100883	0.635223	0.431587	0.958789	0.295602	0.423595	0.766288	0.999844
ENSFDAG00000004198	RF00003	0.439564	0.420409	-0.0691886	0.934838	-0.106023	-0.445515	-0.572188	0.268954	0.0623201	0.00298327	0.0696435	0.0891065	0.0602745	0.0783265	0.396669	0.0921695	0.205247	0.000396522	0.722456	0.0695762	0.0409054	0.104921	0.999844
ENSFDAG00000004200	IGFBP7	-0.519635	0.142972	0.0620175	-0.138206	-0.0451435	-0.146859	-0.0476692	0.103844	0.024062	0.00115185	0.0268896	0.0344044	0.0232722	0.0302422	0.106847	0.356691	0.0676509	0.399328	0.807709	0.335708	0.783997	0.755877	0.999844
ENSFDAG00000004201	ENSFDAG00000004201	-0.0448466	-0.0951134	0.00713233	0.0446839	-0.0241236	0.00656048	0.0894352	0.0205894	0.00477084	0.000228381	0.00533148	0.00682145	0.00461425	0.0059962	0.75463	0.168502	0.636958	0.54056	0.770225	0.92306	0.248103	0.793158	0.999844
ENSFDAG00000004206	HSF2	0.31831	0.290251	-0.0451331	0.0282589	0.00251108	-0.13197	-0.233117	0.0553717	0.0128303	0.000614189	0.0143381	0.0183451	0.0124092	0.0161257	0.176147	0.0103938	0.0685851	0.813434	0.985208	0.236141	0.0663937	0.838154	0.999844
ENSFDAG00000004209	RCL1	-0.0809983	-0.0893485	0.00608821	0.234911	0.0984302	0.0558558	0.00856824	0.104021	0.0241029	0.00115381	0.0269353	0.0344629	0.0233118	0.0302936	0.801706	0.564947	0.857753	0.152334	0.595962	0.714491	0.960737	0.647257	0.999844
ENSFDAG00000004211	STK4	0.80943	-0.447427	-0.0788039	0.358254	0.110019	-0.00427827	0.0793784	0.246135	0.019544	0.00304886	0.0461965	0.0534315	0.0195247	0.0256321	0.102781	0.00137197	0.153528	0.0955522	0.634104	0.975574	0.620032	0.586407	0.999844
ENSFDAG00000004222	RPS18	0.221782	-0.0741734	-0.0168731	-0.173984	0.0424263	-0.0486786	-0.0387401	0.0849798	0.0196909	0.000942606	0.0220049	0.0281545	0.0190446	0.0247484	0.446778	0.597093	0.582609	0.240848	0.800385	0.724285	0.805484	0.713101	0.999844
ENSFDAG00000004224	SLC25A12	0.15198	0.0646265	-0.0166762	-0.0617836	-0.111929	-0.0950499	0.0346765	0.0244877	0.00567411	0.00027162	0.00634089	0.00811296	0.00548787	0.00713146	0.331444	0.390921	0.311609	0.437816	0.213995	0.199468	0.681347	0.768006	0.999844
ENSFDAG00000004227	NDFIP2	-0.130529	0.027727	0.0132096	0.0384071	0.136812	-0.0580226	-0.0444615	0.0401463	0.00930242	0.000445308	0.0103956	0.0133008	0.00899709	0.0116917	0.514755	0.773746	0.531329	0.706402	0.235513	0.540729	0.680931	0.825346	0.999844
ENSFDAG00000004231	RF02271	-1.22406	-0.313276	0.128749	0.447546	-0.148865	0.329019	0.69665	0.610865	0.141545	0.00677579	0.158179	0.202385	0.1369	0.1779	0.117318	0.405024	0.117795	0.260467	0.740717	0.373873	0.0985993	0.71959	0.999844
ENSFDAG00000004235	DHRS13	0.190454	-0.424823	-0.00891608	-0.00348687	0.234725	0.0523611	0.204269	0.0969227	0.0224583	0.00107508	0.0250974	0.0321113	0.0217211	0.0282265	0.5407	0.00458564	0.785677	0.98244	0.190237	0.722382	0.224049	0.861287	0.999844
ENSFDAG00000004236	NDRG4	-0.0904639	0.329879	-0.017364	0.474797	0.167013	-0.0426967	-0.0785828	0.267217	0.0619177	0.00296401	0.0691939	0.0885313	0.0598854	0.0778208	0.861078	0.184937	0.749771	0.0710765	0.574588	0.861492	0.778177	0.554315	0.999844
ENSFDAG00000004238	ENSFDAG00000004238	1.42477	-0.908301	-0.107449	0.0377998	-0.836672	-0.0737522	0.0903931	0.417616	0.096767	0.00463224	0.108138	0.138359	0.0935908	0.121621	0.0274725	0.00350159	0.114399	0.908487	0.0244923	0.809494	0.795483	0.851868	0.891918
ENSFDAG00000004240	RF00003	-0.130541	-0.0813027	0.0416704	-0.166673	-0.104021	-0.510205	-0.216056	0.175508	0.0406676	0.00194676	0.0454466	0.0581474	0.0393328	0.0511127	0.755343	0.686828	0.344949	0.434311	0.666194	0.0100946	0.339247	0.767325	0.999844
ENSFDAG00000004249	TXLNG	0.442037	-0.248829	-0.041899	0.128805	0.126147	-0.102112	0.023492	0.0652985	0.0151305	0.000724299	0.0169086	0.0216339	0.0146339	0.0190167	0.0836582	0.0430837	0.119508	0.3219	0.391086	0.398612	0.864732	0.738579	0.999844
ENSFDAG00000004251	ASAH1	-0.0753305	0.0763581	-0.00989498	0.574664	0.392277	0.000664475	-0.0234822	0.115121	0.0201005	0.00133136	0.0267711	0.0336572	0.0196368	0.0257006	0.824297	0.590176	0.786248	0.000444393	0.0324983	0.996217	0.883546	0.108955	0.924253
ENSFDAG00000004261	NFKBIA	1.26239	-0.443324	-0.134194	0.457396	0.249051	-0.0473823	-0.0704499	1.16193	0.0418943	0.0147697	0.197151	0.211561	0.0423052	0.0554026	0.241549	0.0303167	0.269508	0.302948	0.588187	0.817807	0.764707	0.735906	0.999844
ENSFDAG00000004263	TIPRL	-0.217116	0.134683	0.0214033	-0.0498781	0.0130564	-0.042494	-0.0516996	0.0531317	0.0123113	0.000589343	0.013758	0.017603	0.0119072	0.0154734	0.346233	0.22481	0.377965	0.670663	0.921608	0.696963	0.677689	0.820087	0.999844
ENSFDAG00000004264	DXO	0.263786	-0.111891	-0.0327245	0.0952447	-0.0743175	0.172888	0.120504	0.172543	0.0399804	0.00191386	0.0446786	0.0571648	0.0386681	0.050249	0.5254	0.575759	0.454443	0.652278	0.755928	0.379293	0.590873	0.815667	0.999844
ENSFDAG00000004266	TMED7	-0.470997	0.256172	0.0417286	0.153691	0.0798178	-0.13355	-0.0617434	0.0856329	0.0198422	0.00094985	0.022174	0.0283709	0.019191	0.0249386	0.107502	0.0689732	0.175749	0.30202	0.635589	0.335025	0.695812	0.734864	0.999844
ENSFDAG00000004269	ENSFDAG00000004269	0.456495	-0.284042	-0.0507725	0.113831	0.105886	0.193312	0.150082	0.356906	0.0826997	0.00395884	0.092418	0.118246	0.0799853	0.103941	0.444799	0.323293	0.419698	0.708076	0.758139	0.494276	0.641561	0.825346	0.999844
ENSFDAG00000004276	TM7SF3	0.435293	-0.356124	-0.0313658	-0.00954058	-0.0359022	-0.0788559	0.083336	0.0481527	0.0111576	0.000534116	0.0124688	0.0159534	0.0107914	0.0140234	0.0472915	0.00074775	0.174722	0.931911	0.776222	0.447797	0.4816	0.855807	0.999844
ENSFDAG00000004280	CREM	-0.045633	0.0693351	-0.00609303	0.0518588	0.292831	0.186114	-0.110912	0.115247	0.0267042	0.00127833	0.0298423	0.0381822	0.0258277	0.033563	0.89307	0.671354	0.864683	0.764027	0.133976	0.246833	0.544909	0.831509	0.999844
ENSFDAG00000004285	C1orf21	-0.339285	0.0319284	0.038532	0.0666174	0.284439	-0.0361317	-0.298561	0.709267	0.164346	0.00786727	0.183659	0.234986	0.158952	0.206557	0.687047	0.937225	0.663983	0.876469	0.557358	0.927789	0.511231	0.843868	0.999844
ENSFDAG00000004289	DYNC2H1	0.00863138	0.0590762	-0.000610642	-0.232073	0.303575	-0.145472	0.0142423	0.120719	0.0279722	0.00133903	0.0312593	0.0399952	0.0270541	0.0351566	0.980181	0.723921	0.986686	0.189316	0.129023	0.376466	0.939452	0.676533	0.999844
ENSFDAG00000004291	TMEM192	0.56488	-0.147009	-0.0708003	0.246659	0.214596	0.194442	-0.0227265	0.192739	0.0446601	0.00213788	0.0499083	0.063856	0.0431943	0.0561307	0.198205	0.486655	0.12571	0.269548	0.395759	0.349493	0.92358	0.723925	0.999844
ENSFDAG00000004293	RF02271	0.516453	-0.57379	-0.0431611	0.402219	0.0279438	0.037368	0.142721	0.292197	0.0677059	0.00324108	0.0756622	0.0968072	0.0654836	0.0850956	0.339367	0.0274429	0.448369	0.143671	0.928437	0.8839	0.624662	0.638163	0.999844
ENSFDAG00000004296	COPZ2	-1.20213	-0.0743228	0.141699	0.100278	0.131469	-0.169074	0.221375	0.302948	0.0322881	0.00368507	0.0606791	0.0724956	0.0320331	0.0420673	0.0289562	0.679153	0.0195836	0.683944	0.625352	0.344831	0.280438	0.821814	0.999844
ENSFDAG00000004300	SMIM8	-0.000112967	0.265079	-0.0139177	-0.010136	-0.0270171	0.134735	-0.110397	0.0427058	0.00989549	0.000473698	0.0110583	0.0141488	0.00957069	0.0124371	0.999564	0.00770444	0.522519	0.923213	0.820321	0.16844	0.322215	0.85482	0.999844
ENSFDAG00000004301	APOO	-0.129791	0.163759	0.00968362	-0.0908093	0.00776432	-0.027713	-0.0149658	0.0302455	0.00700829	0.000335487	0.00783185	0.0100206	0.00677825	0.00880831	0.455487	0.0504485	0.597022	0.304835	0.938175	0.736412	0.873306	0.737181	0.999844
ENSFDAG00000004302	ENSFDAG00000004302	0.23763	-0.0259035	-0.0245432	-0.0592374	0.0704341	-0.102299	0.0528083	0.130783	0.0303041	0.00145066	0.0338652	0.0433294	0.0293094	0.0380874	0.511122	0.88171	0.519323	0.747529	0.735084	0.550145	0.786707	0.829959	0.999844
ENSFDAG00000004311	EIF4G3	-0.371331	0.0304565	0.0530661	-0.254443	-0.0241919	-0.167531	-0.051764	0.0630689	0.0146139	0.000699567	0.0163312	0.0208952	0.0141342	0.0183673	0.139245	0.801087	0.0448209	0.046476	0.867088	0.158789	0.7025	0.494271	0.999844
ENSFDAG00000004314	ASPH	-0.594847	-0.077928	0.0633279	0.10949	0.291121	0.0681033	0.0678343	0.214961	0.0498092	0.00238437	0.0556624	0.0712183	0.0481743	0.0626023	0.199493	0.726961	0.194664	0.64259	0.275324	0.756345	0.786302	0.814047	0.999844
ENSFDAG00000004317	PPP1R12C	0.694296	-0.449311	-0.0594144	0.0181596	-0.0663695	0.0968531	0.0162954	0.299559	0.0694116	0.00332274	0.0775684	0.0992462	0.0671333	0.0872394	0.204606	0.0881164	0.302669	0.948013	0.833141	0.70855	0.956002	0.859335	0.999844
ENSFDAG00000004319	SPIRE1	0.652759	-0.631518	-0.0594942	0.010413	0.42776	0.154883	0.268671	0.474247	0.109889	0.0052604	0.122803	0.157122	0.106282	0.138113	0.343193	0.0567726	0.412053	0.976295	0.280521	0.634724	0.469717	0.860842	0.999844
ENSFDAG00000004320	GUSB	0.298934	-0.395956	-0.0274321	0.463987	0.0271842	0.0258642	0.104356	0.111886	0.0259255	0.00124106	0.0289721	0.0370689	0.0250746	0.0325843	0.371487	0.0139271	0.436164	0.00641198	0.887718	0.870254	0.563186	0.277617	0.999844
ENSFDAG00000004327	ANOS1	-0.568891	-1.09442	0.134958	-0.183071	-0.101254	-0.252133	0.000662868	0.237427	0.0550148	0.00263356	0.0614798	0.0786613	0.0532091	0.0691449	0.243	3.07e-06	0.00854285	0.46031	0.718084	0.274376	0.997989	0.772337	0.999844
ENSFDAG00000004329	SLF1	0.0068402	0.164669	-0.00449189	-0.0238531	-0.0647793	-0.14786	0.011731	0.0715782	0.0165856	0.000793954	0.0185346	0.0237144	0.0160412	0.0208455	0.979603	0.201027	0.873341	0.860916	0.674004	0.243037	0.935242	0.841722	0.999844
ENSFDAG00000004331	CYBC1	0.676861	-0.163465	-0.0843473	0.208218	0.114615	0.284274	0.0622906	0.263438	0.061042	0.00292209	0.0682153	0.0872792	0.0590384	0.0767202	0.187255	0.508214	0.118675	0.425323	0.698047	0.242018	0.822066	0.765711	0.999844
ENSFDAG00000004332	MRPL38	0.222702	-0.182978	-0.0242105	0.0194314	0.0623317	0.072341	0.203524	0.11795	0.0273307	0.00130832	0.0305424	0.0390779	0.0264336	0.0343503	0.516696	0.268376	0.503278	0.911468	0.752523	0.65636	0.272152	0.852586	0.999844
ENSFDAG00000004333	ENSFDAG00000004333	0.35497	-0.117714	-0.0322927	0.0317721	-0.2165	0.0407146	-0.0783796	0.0604507	0.0140072	0.000670526	0.0156532	0.0200278	0.0135474	0.0176048	0.14881	0.319925	0.212366	0.799536	0.126061	0.726488	0.554704	0.837606	0.999844
ENSFDAG00000004335	LAPTM5	0.834417	-0.974183	-0.100241	1.17832	0.350908	0.412087	0.717833	1.13807	0.0973876	0.0140411	0.216814	0.252824	0.0971364	0.127541	0.434117	0.0017982	0.39758	0.0113877	0.48525	0.186101	0.0444301	0.330747	0.999844
ENSFDAG00000004338	SLC22A17	0.612372	-0.135978	-0.0760896	0.637155	-0.0617461	0.148198	-0.098455	0.543903	0.126029	0.00603304	0.14084	0.1802	0.121893	0.158399	0.406348	0.701698	0.327274	0.0895481	0.884351	0.671219	0.804616	0.574125	0.999844
ENSFDAG00000004341	NUP50	0.00860117	0.0526238	-0.00681875	0.0460072	0.040331	0.0431139	0.0205675	0.00974159	0.00225725	0.000108055	0.00252251	0.00322747	0.00218316	0.00283701	0.930556	0.268025	0.511845	0.359652	0.477755	0.356149	0.699388	0.743177	0.999844
ENSFDAG00000004344	CSTB	-0.338179	-0.183964	0.0415753	0.264039	0.271813	-0.115654	0.0237477	0.093096	0.0215715	0.00103263	0.0241065	0.0308434	0.0208635	0.027112	0.267707	0.210373	0.195739	0.089019	0.121692	0.423308	0.885323	0.574125	0.999844
ENSFDAG00000004346	MGAT1	0.245148	-0.0223456	-0.0391711	0.191365	0.0603136	0.159567	0.142772	0.128279	0.0297238	0.00142288	0.0332168	0.0424997	0.0287482	0.0373582	0.493682	0.896875	0.299065	0.293724	0.769855	0.34665	0.460107	0.730519	0.999844
ENSFDAG00000004349	ENSFDAG00000004349	0.304708	0.294223	-0.0420857	-0.796234	-0.103687	0.336781	0.106499	0.795583	0.184347	0.00882471	0.20601	0.263583	0.178296	0.231695	0.732638	0.493177	0.654148	0.0793842	0.839948	0.425112	0.824897	0.567662	0.999844
ENSFDAG00000004352	EIF3D	0.165757	-0.010515	-0.0160132	-0.15015	0.011036	-0.0170578	0.0406595	0.0144983	0.00335944	0.000160817	0.00375422	0.0048034	0.00324917	0.00422229	0.16863	0.856041	0.206685	0.0142631	0.873485	0.764748	0.531491	0.359107	0.999844
ENSFDAG00000004357	ARL16	0.37193	-0.101278	-0.0304312	-0.0695281	-0.104304	-0.0648392	-0.118515	0.111368	0.0258054	0.00123531	0.0288379	0.0368971	0.0249584	0.0324333	0.265064	0.52839	0.386585	0.682225	0.587124	0.681498	0.510488	0.82139	0.999844
ENSFDAG00000004358	ANKRD29	-0.0776126	-0.427047	0.0240527	-0.24369	0.426422	0.0310387	0.200396	0.163626	0.0379142	0.00181496	0.0423696	0.0542105	0.0366698	0.0476522	0.847844	0.0282942	0.572354	0.236458	0.0670316	0.871237	0.358614	0.710546	0.999844
ENSFDAG00000004359	TDRD7	0.259872	-0.225072	-0.0221479	0.181963	0.0169711	0.0642567	-0.124768	0.0723489	0.0167642	0.000802503	0.0187342	0.0239698	0.0162139	0.0210699	0.333969	0.0821537	0.434319	0.183706	0.912713	0.613818	0.390035	0.67337	0.999844
ENSFDAG00000004362	YIPF2	0.272819	-0.186796	-0.0280543	-0.00300843	-0.00519425	0.141462	0.131261	0.273688	0.0634172	0.00303578	0.0708695	0.0906752	0.0613356	0.0797053	0.602025	0.458231	0.610632	0.990983	0.986238	0.56787	0.641979	0.861287	0.999844
ENSFDAG00000004364	SRSF9	-0.0180477	0.104033	-0.00683718	0.0451528	0.0517468	0.0926985	-0.00841409	0.0382493	0.00886285	0.000424266	0.00990435	0.0126723	0.00857195	0.0111392	0.926475	0.269134	0.739936	0.650042	0.645746	0.316716	0.936458	0.815058	0.999844
ENSFDAG00000004367	ENSFDAG00000004367	0.348333	1.0666	-0.0726697	-0.0161737	-0.215098	0.347994	-1.40156	0.859362	0.199125	0.00953214	0.222525	0.284713	0.192589	0.250269	0.707098	0.0168384	0.456685	0.972649	0.686862	0.427797	0.00508468	0.860841	0.999844
ENSFDAG00000004369	RF00100	0.597274	-0.4566	-0.0236104	-0.012246	-0.00339335	-0.132372	-0.789448	0.354522	0.0821473	0.0039324	0.0918006	0.117456	0.079451	0.103246	0.315804	0.111141	0.706539	0.96776	0.9921	0.638627	0.0140143	0.860841	0.999844
ENSFDAG00000004372	ENSFDAG00000004372	-0.197243	-0.19521	0.0194584	0.971544	-0.534831	0.159643	-0.134994	0.519692	0.120419	0.00576449	0.13457	0.172178	0.116467	0.151348	0.784386	0.573748	0.797729	0.00808676	0.197425	0.639936	0.728593	0.299262	0.999844
ENSFDAG00000004373	RARS	-0.20046	-0.019058	0.0305343	-0.175539	-0.0118319	-0.139376	0.0737747	0.0698604	0.0161876	0.0007749	0.0180898	0.0231453	0.0156562	0.0203452	0.448198	0.88093	0.272687	0.191847	0.93801	0.265326	0.605002	0.677759	0.999844
ENSFDAG00000004375	RF01888	-0.629046	-0.224834	0.0888476	0.0191732	-0.331463	-0.254067	0.351537	0.341304	0.0790845	0.00378578	0.088378	0.113077	0.0764887	0.0993968	0.281595	0.424004	0.148738	0.948576	0.324276	0.358278	0.264839	0.859335	0.999844
ENSFDAG00000004378	CTNS	0.375613	-0.05474	-0.0557866	0.546207	0.243791	-0.0345172	-0.0276216	0.187471	0.0434395	0.00207945	0.0485442	0.0621107	0.0420137	0.0545966	0.385664	0.792828	0.221193	0.0131727	0.327967	0.866269	0.905899	0.348094	0.999844
ENSFDAG00000004386	PDE1A	-0.0534819	0.579002	-0.0232883	-0.249181	-0.186698	0.0592906	0.256064	0.141443	0.0327742	0.0015689	0.0366256	0.0468612	0.0316984	0.041192	0.886918	0.00138257	0.556566	0.192905	0.388442	0.739121	0.207071	0.678089	0.999844
ENSFDAG00000004387	MIR214	-0.67692	0.114858	0.0885827	-0.29577	0.299154	-0.382718	-0.214301	0.261729	0.0606459	0.00290313	0.0677726	0.0867128	0.0586554	0.0762224	0.185783	0.640929	0.100165	0.255904	0.309674	0.114051	0.43762	0.71959	0.999844
ENSFDAG00000004393	FHOD3	-0.178526	-0.528662	0.060364	-0.441085	0.109273	-0.109654	-0.0276744	0.336432	0.0779557	0.00373174	0.0871164	0.111463	0.0753969	0.097978	0.758243	0.058298	0.32308	0.135066	0.743439	0.689639	0.929549	0.632151	0.999844
ENSFDAG00000004395	FHL1	-0.192833	0.0301098	0.0385223	-0.0587552	-0.648891	-0.124336	-0.174099	0.0830382	0.019241	0.000921069	0.0215021	0.0275112	0.0186095	0.0241829	0.50338	0.828156	0.204332	0.68865	9.15e-05	0.36206	0.262908	0.822998	0.329545
ENSFDAG00000004397	WDR18	0.639894	-0.330227	-0.0665273	0.164107	0.0318614	0.0925655	0.148175	0.26893	0.0623147	0.00298301	0.0696374	0.0890988	0.0602693	0.0783197	0.217232	0.185879	0.223197	0.534022	0.914995	0.706135	0.596482	0.791796	0.999844
ENSFDAG00000004399	CTDSPL2	0.00727713	0.0242939	0.000926079	-0.00645718	0.000756487	-0.139465	0.0242553	0.0658442	0.015257	0.000730352	0.0170498	0.0218147	0.0147562	0.0191756	0.977375	0.844077	0.972664	0.960559	0.995913	0.250929	0.860955	0.860841	0.999844
ENSFDAG00000004403	ENSFDAG00000004403	-0.328158	0.0604157	0.0347256	0.194548	-0.0505265	-0.0814998	-0.0635956	0.0658423	0.0152565	0.00073033	0.0170493	0.0218141	0.0147557	0.019175	0.200939	0.624751	0.198806	0.136237	0.732277	0.502267	0.646047	0.634137	0.999844
ENSFDAG00000004404	RF00574	0.236204	0.0930939	-0.0501915	0.0758639	0.551859	0.233314	0.135686	0.98524	0.228293	0.0109284	0.25512	0.326418	0.2208	0.286928	0.811907	0.845519	0.63114	0.880609	0.334084	0.619524	0.80003	0.844215	0.999844
ENSFDAG00000004405	ENSFDAG00000004405	-0.114075	0.167039	0.00810859	-0.13838	-0.0268871	0.0852755	-0.075655	0.0469925	0.0108888	0.000521246	0.0121683	0.015569	0.0105314	0.0136855	0.598727	0.109429	0.72247	0.209674	0.82939	0.405994	0.517821	0.68737	0.999844
ENSFDAG00000004406	TIGAR	-0.381272	0.126085	0.0441481	-0.229678	-0.039777	-0.0298659	-0.0353877	0.0427194	0.00555363	0.000510985	0.0090301	0.0110255	0.0054785	0.00719113	0.0650832	0.0906655	0.0508164	0.01565	0.704821	0.68658	0.676455	0.371119	0.999844
ENSFDAG00000004409	WDR46	0.460599	-0.277212	-0.0467078	0.0526841	-0.0196319	0.0661201	0.243118	0.177416	0.0411095	0.00196792	0.0459404	0.0587792	0.0397602	0.0516682	0.274166	0.171553	0.292388	0.805837	0.935462	0.740194	0.284817	0.838154	0.999844
ENSFDAG00000004417	SLC39A1	0.114593	-0.173245	-0.00994523	0.0544934	0.147797	0.0401237	0.0629526	0.0669541	0.0155141	0.000742662	0.0173372	0.0221824	0.0150049	0.0194988	0.657864	0.164255	0.715158	0.678976	0.321032	0.743248	0.652115	0.821374	0.999844
ENSFDAG00000004425	ENSFDAG00000004425	-0.602146	0.00673927	0.0602748	-0.0297128	0.0476429	0.188878	0.225735	0.105371	0.0244158	0.00116878	0.0272849	0.0349102	0.0236144	0.0306868	0.0635974	0.965598	0.0778891	0.857247	0.798731	0.219028	0.197532	0.841166	0.999844
ENSFDAG00000004427	ZNF567	-0.062866	0.229207	0.00302229	0.0947329	-0.131519	-0.0902118	-0.228603	0.0880784	0.0204089	0.000976977	0.0228072	0.0291811	0.019739	0.0256508	0.832242	0.108622	0.92297	0.530473	0.441355	0.520811	0.153478	0.791153	0.999844
ENSFDAG00000004428	ANAPC16	-0.0793698	0.00914886	0.0065505	0.112437	-0.0565632	-0.00591538	0.0315008	0.0605102	0.014021	0.000671186	0.0156686	0.0200475	0.0135608	0.0176222	0.746955	0.938413	0.800389	0.369058	0.689533	0.959487	0.812426	0.745349	0.999844
ENSFDAG00000004430	ENSFDAG00000004430	0.168515	-0.189514	-0.0211273	0.209175	-0.0806057	0.253515	0.118322	0.1826	0.0423109	0.00202542	0.047283	0.060497	0.0409221	0.0531781	0.693318	0.356877	0.63875	0.336069	0.743126	0.210128	0.607884	0.742729	0.999844
ENSFDAG00000004438	ENSFDAG00000004438	-1.10952	0.0285471	0.136188	-0.401112	0.185719	-0.140357	0.0527003	0.172626	0.0333369	0.00196853	0.0416423	0.0527816	0.0324523	0.0423915	0.00757533	0.875757	0.00214409	0.0493436	0.418872	0.435902	0.797981	0.498478	0.999844
ENSFDAG00000004439	CLEC4E	-0.743283	0.0424122	0.0337537	2.30888	2.0552	0.319296	-0.580853	1.50167	0.102457	0.0187317	0.274303	0.312178	0.102653	0.134708	0.54415	0.894588	0.8052	1.04e-05	0.000234751	0.318974	0.113514	0.0521789	0.368571
ENSFDAG00000004447	PHEX	0.503695	0.253621	-0.07631	-0.549186	0.647223	-0.016322	0.324091	0.34988	0.0810717	0.00388091	0.0905986	0.115918	0.0784107	0.101894	0.394466	0.373069	0.220598	0.068067	0.0573041	0.953518	0.309966	0.547434	0.999844
ENSFDAG00000004448	RF00396	0.338112	0.5642	-0.102079	0.607565	0.0663522	0.86866	-0.136559	0.762923	0.176779	0.00846243	0.197553	0.252763	0.170977	0.222183	0.698684	0.179631	0.267145	0.171643	0.895002	0.03566	0.772038	0.662235	0.999844
ENSFDAG00000004457	ARMCX1	0.635804	-0.388523	-0.0468893	-0.109875	0.0344791	-0.185045	-0.0445237	0.201522	0.0466953	0.00223531	0.0521826	0.0667659	0.0451626	0.0586886	0.156681	0.072183	0.321316	0.630525	0.893847	0.383896	0.854181	0.809444	0.999844
ENSFDAG00000004458	RF00156	0.629054	0.117145	-0.0703234	-0.221174	-0.313472	0.135641	-0.128858	0.47281	0.109556	0.00524446	0.12243	0.156646	0.10596	0.137695	0.360276	0.723398	0.331515	0.527317	0.428345	0.676902	0.728398	0.791099	0.999844
ENSFDAG00000004459	ENSFDAG00000004459	0.772306	-0.331954	-0.10508	0.963288	0.0185543	0.329233	0.102042	0.569855	0.132043	0.0063209	0.147559	0.188797	0.127709	0.165957	0.306272	0.360966	0.186272	0.0121525	0.965939	0.356902	0.802212	0.340589	0.999844
ENSFDAG00000004461	GEMIN7	-0.00324936	-0.0229379	0.00688398	-0.128699	-0.141984	0.0354383	-0.0191324	0.0815056	0.0188859	0.00090407	0.0211052	0.0270035	0.018266	0.0237366	0.990919	0.86744	0.818909	0.375677	0.387572	0.793159	0.901171	0.747989	0.999844
ENSFDAG00000004462	ENSFDAG00000004462	1.84011	0.220921	-0.318972	2.95554	2.86598	0.051565	-0.269958	3.83967	0.147436	0.0487417	0.654555	0.705925	0.148807	0.194914	0.347695	0.565053	0.148519	0.000259074	0.000647023	0.893661	0.540888	0.0908036	0.391333
ENSFDAG00000004463	POLR1D	0.0224157	0.242055	-0.0126024	-0.0555046	-0.0536639	0.0516523	-0.0900657	0.0291663	0.0067582	0.000323516	0.00755238	0.00966302	0.00653638	0.008494	0.895574	0.00323569	0.483518	0.523028	0.585124	0.522899	0.328448	0.789933	0.999844
ENSFDAG00000004465	ENSFDAG00000004465	-0.0737211	0.16459	0.00476896	-0.0806165	-0.0104255	-0.0831969	-0.0358052	0.055312	0.0128165	0.000613527	0.0143226	0.0183253	0.0123958	0.0161083	0.753931	0.145988	0.847324	0.500555	0.938612	0.454909	0.777858	0.784754	0.999844
ENSFDAG00000004474	UBE2O	0.545491	-0.0943056	-0.0541898	-0.0793228	0.0136931	0.0077941	-0.110111	0.114101	0.0264386	0.00126562	0.0295455	0.0378025	0.0255708	0.0332292	0.106334	0.561924	0.127701	0.644454	0.943853	0.961126	0.545814	0.814799	0.999844
ENSFDAG00000004478	MAT2A	0.059266	0.116681	-0.0181186	0.146464	-0.0494873	0.0623784	0.0480692	0.0284293	0.00658744	0.000315341	0.00736155	0.00941886	0.00637122	0.00827937	0.725215	0.150545	0.307579	0.0878127	0.610114	0.434515	0.597301	0.574051	0.999844
ENSFDAG00000004480	PPIP5K2	-0.120489	-0.0400509	0.0197217	-0.111639	0.0027796	-0.102184	0.0690688	0.0933102	0.0216212	0.00103501	0.0241619	0.0309144	0.0209115	0.0271744	0.693255	0.785331	0.539865	0.472628	0.987387	0.4798	0.675225	0.776237	0.999844
ENSFDAG00000004484	PFDN5	-0.0284238	0.165749	-0.00400858	-0.00868155	0.0400373	0.0566708	-0.150595	0.0621488	0.0144007	0.000689362	0.016093	0.0205904	0.013928	0.0180994	0.909225	0.167215	0.878655	0.945439	0.780231	0.631091	0.262976	0.859127	0.999844
ENSFDAG00000004487	PHRF1	0.63367	-0.516286	-0.0606007	0.183415	-0.00936954	0.237771	0.222184	0.356941	0.0827079	0.00395924	0.0924272	0.118258	0.0799932	0.103951	0.288857	0.072619	0.335496	0.546307	0.978263	0.400526	0.490744	0.794697	0.999844
ENSFDAG00000004489	RF00088	0.631614	0.331215	-0.0863946	-0.237154	-0.113353	0.422098	-0.337667	0.225753	0.0523099	0.00250408	0.0584569	0.0747937	0.0505929	0.0657452	0.183737	0.147571	0.0842603	0.326656	0.678525	0.0605748	0.187868	0.74009	0.999844
ENSFDAG00000004490	ADAT2	-0.179241	0.206583	0.00833523	-0.00162524	-0.0169795	-0.0208108	0.113754	0.0324124	0.00751037	0.000359522	0.00839294	0.0107385	0.00726386	0.00943935	0.319449	0.0171366	0.660229	0.985846	0.869847	0.807094	0.241663	0.861287	0.999844
ENSFDAG00000004493	SPHK1	0.947966	0.176965	-0.133818	0.213857	-0.161257	0.480102	-0.0236494	0.758143	0.175672	0.00840941	0.196315	0.251179	0.169906	0.220791	0.276276	0.672866	0.144495	0.629334	0.747638	0.244124	0.959859	0.809444	0.999844
ENSFDAG00000004495	MIR196B	-0.750159	0.313992	0.073804	0.276614	0.540721	-0.271469	-0.495179	0.966493	0.223949	0.0107205	0.250266	0.320207	0.216598	0.281469	0.445432	0.507008	0.475964	0.580309	0.339295	0.55969	0.350637	0.804309	0.999844
ENSFDAG00000004499	IGFBP5	-0.90375	0.192615	0.101133	-0.391468	0.117665	0.0138664	-0.0956635	0.235385	0.0545417	0.00261092	0.060951	0.0779848	0.0527515	0.0685503	0.0624945	0.40951	0.0477892	0.11282	0.6735	0.951858	0.71483	0.608458	0.999844
ENSFDAG00000004500	MOCS3	0.112599	-0.147313	-0.00676656	-0.0727467	0.0547539	0.0389651	0.0522376	0.0291304	0.0067499	0.000323118	0.0075431	0.00965114	0.00652834	0.00848355	0.509433	0.0729648	0.706595	0.402254	0.57729	0.629627	0.570616	0.757996	0.999844
ENSFDAG00000004503	CXorf56	-0.241934	-0.276011	0.0428555	0.0705238	-0.00626274	-0.0893182	0.0165815	0.0747451	0.0173194	0.000829081	0.0193547	0.0247636	0.0167509	0.0217678	0.376198	0.0359676	0.136656	0.612208	0.968254	0.490123	0.910516	0.808085	0.999844
ENSFDAG00000004505	CCDC47	-0.224225	0.0691484	0.0260467	-0.177482	0.0452567	-0.0578431	0.0645752	0.0501828	0.011628	0.000556633	0.0129944	0.016626	0.0112463	0.0146146	0.316858	0.521358	0.269595	0.119481	0.725599	0.585452	0.59323	0.617178	0.999844
ENSFDAG00000004509	MCU	-0.0769183	-0.148294	0.0218455	-0.227591	-0.0792966	-0.0924444	0.167635	0.041394	0.00959153	0.000459147	0.0107187	0.0137142	0.00927671	0.012055	0.705386	0.129979	0.307968	0.0279282	0.498326	0.337153	0.126812	0.43294	0.999844
ENSFDAG00000004511	ENSFDAG00000004511	-0.00673685	-0.298948	0.0141321	0.0104394	0.210795	-0.136656	0.134073	0.108891	0.0252314	0.00120783	0.0281964	0.0360764	0.0244033	0.0317119	0.983712	0.0598331	0.684276	0.950428	0.26708	0.381687	0.451518	0.859745	0.999844
ENSFDAG00000004517	ENSFDAG00000004517	0.0727085	-0.0972489	-0.000660585	-0.00333642	0.0637463	-0.198174	0.0573954	0.0448011	0.010381	0.000496939	0.0116009	0.014843	0.0100403	0.0130473	0.731214	0.339842	0.97636	0.975288	0.600812	0.0479558	0.615331	0.860841	0.999844
ENSFDAG00000004519	LRRC27	-0.258936	0.00754419	0.0353682	-0.212018	-0.0392249	-0.106376	0.0859356	0.0731051	0.0169394	0.00081089	0.01893	0.0242203	0.0163834	0.0212901	0.338227	0.953777	0.214226	0.123321	0.801009	0.40593	0.55589	0.622184	0.999844
ENSFDAG00000004521	BBS12	-0.183239	0.0657754	0.0288687	-0.275805	-0.153834	-0.177366	0.0785381	0.0804353	0.0186379	0.000892198	0.0208281	0.0266489	0.0180262	0.0234249	0.518221	0.62995	0.333799	0.0559954	0.346012	0.186485	0.607849	0.517214	0.999844
ENSFDAG00000004523	ENSFDAG00000004523	-0.432236	-0.00553856	0.0330983	0.277604	0.183989	0.314127	0.0568333	0.0979392	0.0226938	0.00108635	0.0253606	0.032448	0.0219489	0.0285225	0.167231	0.970672	0.315283	0.0812994	0.307063	0.0339802	0.73648	0.567662	0.999844
ENSFDAG00000004528	TPM3	0.498626	-0.300602	-0.0464148	-0.144408	-0.085795	0.216669	0.148124	0.0558286	0.0129362	0.000619257	0.0144564	0.0184965	0.0125116	0.0162588	0.0348313	0.00821889	0.0621562	0.229731	0.528146	0.052739	0.245369	0.707211	0.999844
ENSFDAG00000004531	ULK2	-0.0166575	0.0362485	0.00476617	0.100863	0.0337156	-0.118032	-0.228962	0.0440113	0.010198	0.000488179	0.0113964	0.0145813	0.00986326	0.0128173	0.936713	0.719633	0.82921	0.34475	0.780083	0.234648	0.0431361	0.742729	0.999844
ENSFDAG00000004533	HSPA4L	-0.40856	0.199214	0.0378644	-0.041529	0.12534	-0.127498	0.0807674	0.0740526	0.0171589	0.0008214	0.0191753	0.0245342	0.0165957	0.0215661	0.133261	0.128308	0.186449	0.764251	0.42359	0.322319	0.58233	0.831591	0.999844
ENSFDAG00000004534	ARHGEF25	-0.851311	0.0998392	0.0856802	-0.153083	0.281699	-0.089552	0.2972	0.371436	0.0860666	0.00412001	0.0961805	0.12306	0.0832416	0.108172	0.162462	0.733618	0.181927	0.621582	0.421962	0.756266	0.366191	0.809003	0.999844
ENSFDAG00000004541	OAZ2	0.189387	-0.177282	-0.0248318	0.143954	0.0118071	0.241051	0.0963231	0.123282	0.028566	0.00136746	0.0319228	0.0408442	0.0276283	0.0359029	0.589618	0.294218	0.501896	0.420417	0.953412	0.147	0.611206	0.763394	0.999844
ENSFDAG00000004554	GNAI2	0.046691	-0.149151	0.0055298	-0.150323	0.0439416	-0.02997	0.022928	0.0491129	0.0113801	0.000544766	0.0127174	0.0162715	0.0110066	0.014303	0.833132	0.162068	0.812718	0.182535	0.730487	0.775132	0.847966	0.672324	0.999844
ENSFDAG00000004567	ENSFDAG00000004567	-0.176034	0.244075	0.00975345	-0.221705	-0.0251382	0.117916	0.0241115	0.0366509	0.00849249	0.000406536	0.00949047	0.0121427	0.00821374	0.0106737	0.357833	0.00808402	0.628573	0.0228587	0.819548	0.193234	0.815465	0.409903	0.999844
ENSFDAG00000004569	SIX2	0.367057	-1.20014	0.0164203	-0.270939	0.376704	-0.285781	0.496251	0.296351	0.0686684	0.00328716	0.0767378	0.0981835	0.0664145	0.0863053	0.500143	4.65e-06	0.774573	0.328044	0.229281	0.267464	0.0911797	0.74009	0.999844
ENSFDAG00000004571	ENSFDAG00000004571	-0.222425	0.66981	-0.0138746	0.189729	0.233194	0.0331361	-0.184063	0.140498	0.0325552	0.00155842	0.0363808	0.0465481	0.0314866	0.0409167	0.552912	0.000205394	0.725243	0.319876	0.279763	0.851864	0.362851	0.738574	0.999844
ENSFDAG00000004576	ENSFDAG00000004576	0.0793624	0.0133666	-0.00331652	0.104505	-0.164313	-0.254938	-0.00971819	0.107866	0.0249939	0.00119646	0.027931	0.0357368	0.0241735	0.0314134	0.809057	0.932621	0.923615	0.531768	0.384743	0.101067	0.956273	0.791623	0.999844
ENSFDAG00000004588	RF00438	-0.0268092	0.696202	-0.0534628	-0.177541	0.409962	1.29903	-0.652028	0.718855	0.166568	0.00797362	0.186142	0.238162	0.161101	0.20935	0.974775	0.0880373	0.54936	0.680702	0.400879	0.0012102	0.154143	0.821377	0.999844
ENSFDAG00000004594	STX4	0.362676	-0.0976484	-0.0472873	0.394858	0.10813	0.111645	-0.10057	0.0587012	0.0104592	0.000677026	0.0137496	0.0173165	0.0102106	0.0133591	0.134417	0.339674	0.0691613	0.000758797	0.411247	0.269212	0.384232	0.127439	0.999844
ENSFDAG00000004595	BROX	0.143056	-0.0280932	-0.0162631	-0.0823836	0.0508545	-0.00930463	0.0947817	0.0179483	0.00415886	0.000199085	0.00464758	0.00594643	0.00402236	0.00522703	0.285608	0.663108	0.249069	0.226876	0.509588	0.883361	0.189864	0.70399	0.999844
ENSFDAG00000004596	PDLIM1	0.598618	-0.105891	-0.0546058	0.0184317	-0.541642	-0.0263664	-0.0636606	0.12827	0.0297217	0.00142278	0.0332144	0.0424967	0.0287462	0.0373555	0.0946369	0.539072	0.14771	0.919443	0.00860272	0.876419	0.741871	0.854799	0.63427
ENSFDAG00000004597	SFMBT1	0.312186	-0.312046	-0.0185895	0.0246608	0.1502	-0.192425	0.0265577	0.054941	0.0127306	0.000609412	0.0142266	0.0182024	0.0123127	0.0160003	0.1829	0.00568125	0.451433	0.836201	0.265587	0.0828921	0.833702	0.838364	0.999844
ENSFDAG00000004600	CARNMT1	-0.289356	0.0886403	0.0324898	-0.047312	-0.062754	0.0432358	-0.12572	0.0806609	0.0186902	0.0008947	0.0208865	0.0267236	0.0180767	0.0234906	0.308284	0.516744	0.277392	0.743388	0.701068	0.747774	0.412061	0.829018	0.999844
ENSFDAG00000004604	RF00189	0.468497	0.174691	-0.0591894	0.0946856	-0.376166	0.322142	-0.442589	0.478199	0.110805	0.00530424	0.123826	0.158431	0.107168	0.139264	0.498095	0.599725	0.416387	0.78787	0.344629	0.325093	0.235627	0.83494	0.999844
ENSFDAG00000004609	FAM81A	1.60661	-1.0308	-0.174414	0.708273	0.0716145	0.461153	0.587308	1.87012	0.169025	0.0230001	0.360428	0.422827	0.16838	0.221105	0.240061	0.0121672	0.250123	0.238098	0.912303	0.261086	0.211661	0.710962	0.999844
ENSFDAG00000004611	SDHAF2	0.257904	-0.0345586	-0.0285922	-0.00621561	-0.0153781	0.0560843	-0.00774785	0.0573559	0.0132901	0.000636198	0.0148519	0.0190025	0.0128539	0.0167036	0.281531	0.764351	0.256972	0.959323	0.911174	0.620826	0.952197	0.860841	0.999844
ENSFDAG00000004612	CUL5	-0.0732328	0.0953789	0.00766147	-0.207009	0.0533643	-0.0466292	0.0399982	0.0594635	0.0137785	0.000659576	0.0153976	0.0197007	0.0133262	0.0173173	0.763935	0.416474	0.76546	0.0952657	0.703799	0.686265	0.761167	0.586407	0.999844
ENSFDAG00000004613	RNF114	0.18822	-0.202521	-0.0170005	0.0485875	0.0183981	0.0402411	0.141348	0.0487761	0.0113021	0.00054103	0.0126302	0.0161599	0.0109311	0.0142049	0.39408	0.0567826	0.464847	0.665499	0.884925	0.700318	0.235638	0.817922	0.999844
ENSFDAG00000004614	FBXO48	-0.000183136	-0.205791	0.0120725	0.108876	-0.164057	-0.0529456	-0.00328338	0.0381753	0.00884571	0.000423445	0.00988519	0.0126478	0.00855537	0.0111177	0.999252	0.0286649	0.557422	0.273488	0.144628	0.567041	0.975158	0.726395	0.999844
ENSFDAG00000004617	ENSFDAG00000004617	0.251057	-0.0512201	-0.0269738	0.127902	-0.0132428	-0.0511556	-0.0364411	0.0246645	0.00571508	0.000273581	0.00638668	0.00817154	0.0055275	0.00718296	0.109912	0.498069	0.102935	0.109502	0.883529	0.491413	0.667216	0.605249	0.999844
ENSFDAG00000004623	STAM2	-0.224838	0.0490173	0.029643	-0.0728784	-0.0184801	-0.127786	-0.0423382	0.0738954	0.0171225	0.000819656	0.0191346	0.0244821	0.0165605	0.0215203	0.408177	0.70796	0.300484	0.598296	0.905982	0.320713	0.772882	0.806406	0.999844
ENSFDAG00000004629	RBM19	1.03344	-0.477939	-0.104887	0.0441155	-0.211342	0.307753	0.252857	0.453193	0.105011	0.00502687	0.117351	0.150146	0.101564	0.131982	0.124753	0.140245	0.139045	0.897532	0.585467	0.334205	0.486419	0.848718	0.999844
ENSFDAG00000004630	RF00405	0.0564879	-0.461198	0.0217801	0.442907	-0.037072	-0.53844	-0.0440697	0.635184	0.14718	0.00704553	0.164476	0.210441	0.142349	0.184982	0.943496	0.229301	0.795266	0.27479	0.935591	0.153546	0.918388	0.727016	0.999844
ENSFDAG00000004633	RF02198	0.341139	-0.0216034	-0.03448	-0.081913	0.303798	-0.0652756	-0.260426	0.197477	0.0457581	0.00219044	0.0511352	0.0654258	0.0442561	0.0575107	0.442685	0.919556	0.461293	0.717175	0.234948	0.756342	0.277501	0.826038	0.999844
ENSFDAG00000004637	RF00398	0.706558	0.173667	-0.0876955	0.0956958	-0.299167	-0.109411	0.0546101	0.426131	0.0987401	0.0047267	0.110343	0.141181	0.0954992	0.124101	0.279087	0.580486	0.202114	0.773282	0.425912	0.723303	0.876806	0.832796	0.999844
ENSFDAG00000004638	RPL37A	0.248941	0.0437297	-0.0238573	-0.227632	0.0384904	-0.0496555	-0.0863611	0.110548	0.0256154	0.00122621	0.0286255	0.0366254	0.0247746	0.0321945	0.454024	0.784677	0.495682	0.178491	0.840603	0.752401	0.630294	0.669021	0.999844
ENSFDAG00000004645	MRPS9	-0.0452168	0.146245	-0.000564935	0.0723508	-0.0652751	0.000925757	-0.121252	0.0122837	0.0028463	0.000136253	0.00318078	0.0040697	0.00275288	0.00357735	0.683291	0.00612156	0.961399	0.199544	0.306207	0.985923	0.0426373	0.680891	0.999844
ENSFDAG00000004651	TP53INP2	0.840905	0.380508	-0.113755	0.713705	-0.403752	0.236717	-1.06058	1.34428	0.311488	0.014911	0.348092	0.445372	0.301264	0.391492	0.468285	0.495379	0.351558	0.226401	0.545181	0.666267	0.0900669	0.703612	0.999844
ENSFDAG00000004652	ALDH3A2	-0.0359716	0.102813	-0.00133835	0.0583552	0.0927198	-0.0930494	-0.0190984	0.0260402	0.00603385	0.000288841	0.0067429	0.00862732	0.0058358	0.00758359	0.823602	0.18564	0.937233	0.477301	0.318163	0.223207	0.826408	0.777951	0.999844
ENSFDAG00000004658	MED28	0.376117	-0.133159	-0.0396034	-0.00301956	-0.0272644	-0.0192787	0.151192	0.0509906	0.0118152	0.000565593	0.0132036	0.0168936	0.0114274	0.0148498	0.0957874	0.220559	0.0958625	0.979035	0.83385	0.856882	0.214716	0.861249	0.999844
ENSFDAG00000004661	RF01225	0.399873	0.364418	-0.0785526	-0.0497533	0.157252	0.302801	0.213241	0.501196	0.116134	0.00555932	0.129781	0.16605	0.112322	0.145962	0.572189	0.284911	0.292095	0.890156	0.69957	0.366264	0.576741	0.846129	0.999844
ENSFDAG00000004662	NFKB2	0.706289	-0.394027	-0.0624493	-0.0162821	-0.013257	-0.130935	0.158634	0.291682	0.0675866	0.00323537	0.0755289	0.0966367	0.0653682	0.0849457	0.190955	0.12961	0.272246	0.952757	0.965984	0.608568	0.586245	0.860136	0.999844
ENSFDAG00000004664	ARL15	-0.0678036	-0.0354708	0.0204521	-0.0663405	-0.191415	-0.0851632	-0.219343	0.0844825	0.0195757	0.00093709	0.0218761	0.0279897	0.0189332	0.0246035	0.815547	0.799866	0.504065	0.653769	0.252569	0.535963	0.161999	0.816437	0.999844
ENSFDAG00000004668	RF02124	0.463748	0.174216	-0.029508	-0.261488	-0.724147	-0.303501	-0.428584	0.68506	0.158737	0.00759877	0.177391	0.226966	0.153527	0.199508	0.575277	0.661916	0.734981	0.5347	0.128509	0.438586	0.337295	0.791967	0.999844
ENSFDAG00000004669	PSME1	0.380003	0.0490556	-0.0495469	0.229229	0.0439266	0.0279755	-0.167619	0.0648195	0.0150195	0.000718985	0.0167845	0.0214752	0.0145265	0.0188772	0.13555	0.688952	0.0646304	0.0768342	0.764368	0.816452	0.222469	0.562992	0.999844
ENSFDAG00000004671	MON1B	1.16427	-0.374023	-0.128967	0.130442	0.0290206	0.374113	0.0800483	0.541304	0.125427	0.0060042	0.140166	0.179338	0.12131	0.157642	0.113546	0.290926	0.096037	0.727529	0.945365	0.282768	0.84022	0.826038	0.999844
ENSFDAG00000004672	SCLY	0.338108	-0.137808	-0.0441099	0.288554	-0.0675683	0.148725	0.139989	0.25244	0.0584937	0.0028001	0.0653674	0.0836355	0.0565737	0.0735173	0.500986	0.568816	0.404516	0.259059	0.815264	0.531785	0.605648	0.71959	0.999844
ENSFDAG00000004674	RF00411	0.64834	-0.350933	-0.0576816	-0.0218819	-0.337211	0.114905	0.116015	0.383138	0.0887781	0.00424981	0.0992106	0.126937	0.0858641	0.11158	0.294901	0.238876	0.376256	0.944614	0.343907	0.69496	0.728356	0.859044	0.999844
ENSFDAG00000004675	TARDBP	-0.14079	0.0952399	0.0121451	0.0286286	-0.0816319	-0.0643023	0.0688124	0.0486234	0.0112667	0.000539337	0.0125907	0.0161093	0.0108969	0.0141604	0.523161	0.369577	0.601001	0.798616	0.520118	0.537899	0.563084	0.837381	0.999844
ENSFDAG00000004680	DDX55	0.409802	-0.108564	-0.043191	-0.0473347	0.056508	-0.0200176	0.0970887	0.0353012	0.00817976	0.000391566	0.00914099	0.0116956	0.00791127	0.0102807	0.0291747	0.229995	0.029059	0.620537	0.601312	0.821937	0.338293	0.808788	0.999844
ENSFDAG00000004683	SNRNP200	0.39878	-0.252367	-0.0442283	0.0456809	0.0785316	0.316164	0.0955804	0.313746	0.072699	0.00348011	0.081242	0.103947	0.0703128	0.0913711	0.476501	0.349281	0.453418	0.872671	0.807557	0.233133	0.751849	0.84352	0.999844
ENSFDAG00000004684	FBXW7	-0.102429	0.140235	0.0123037	0.0417452	-0.143432	-0.16748	-0.111016	0.0531986	0.0123268	0.000590085	0.0137754	0.0176251	0.0119222	0.0154929	0.656978	0.20656	0.612507	0.722083	0.279969	0.125064	0.37244	0.826038	0.999844
ENSFDAG00000004685	ENSFDAG00000004685	-0.00318232	-0.115024	0.000514433	0.00347707	0.103199	0.0731914	0.143638	0.0520934	0.0120707	0.000577826	0.0134892	0.017259	0.0116745	0.015171	0.988876	0.295127	0.982926	0.976117	0.432137	0.498157	0.243547	0.860841	0.999844
ENSFDAG00000004686	ZEB2	0.588867	-0.293652	-0.0526422	0.0893971	-0.118889	-0.192338	0.168143	0.0844513	0.0195685	0.000936744	0.021868	0.0279794	0.0189262	0.0245945	0.0427292	0.0357991	0.0854357	0.54549	0.477234	0.162088	0.283649	0.794405	0.999844
ENSFDAG00000004688	RF02142	-0.374599	-1.31604	0.129226	-0.304428	-0.115102	-0.400554	0.109523	0.446069	0.10336	0.00494786	0.115506	0.147786	0.0999675	0.129907	0.574883	4.25e-05	0.0661893	0.370392	0.764628	0.205202	0.761226	0.746394	0.999844
ENSFDAG00000004690	RF00026	0.342056	-0.0234622	-0.0301906	-0.1076	-0.128624	0.0512483	-0.300364	0.669833	0.155209	0.00742987	0.173448	0.221921	0.150115	0.195073	0.675991	0.952511	0.726149	0.796128	0.784824	0.894769	0.496465	0.837152	0.999844
ENSFDAG00000004692	MRPS36	-0.142747	0.291544	0.00437396	0.0278809	-0.00467857	0.0195936	-0.155583	0.043991	0.0101933	0.000487954	0.0113911	0.0145746	0.00985872	0.0128114	0.496132	0.00388113	0.843038	0.793915	0.969087	0.843565	0.169267	0.836838	0.999844
ENSFDAG00000004693	ABHD12	-0.237132	-0.00723737	0.0273785	0.0213262	0.154317	-0.0671341	-0.0356914	0.0347485	0.00805168	0.000385434	0.00899785	0.0115125	0.0077874	0.0101197	0.203338	0.935715	0.163151	0.822116	0.150367	0.446801	0.722742	0.838154	0.999844
ENSFDAG00000004695	RF02137	0.62384	-1.71627	0.0223172	0.294574	0.378	-0.706135	0.0148248	0.484721	0.112316	0.00537658	0.125515	0.160592	0.10863	0.141164	0.370231	3.04e-07	0.760854	0.405707	0.345549	0.0321562	0.968526	0.758881	0.999844
ENSFDAG00000004696	PTEN	-0.424149	0.0379411	0.0438172	0.0940244	0.136053	-0.0911578	0.0851461	0.100489	0.0232846	0.00111464	0.0260209	0.0332929	0.0225204	0.0292651	0.180893	0.803637	0.189373	0.559974	0.455882	0.543556	0.618678	0.798175	0.999844
ENSFDAG00000004703	RF00150	-0.162749	0.0495883	0.0513873	-0.0814552	-0.602949	-0.747834	-0.299484	0.576806	0.133653	0.006398	0.149359	0.1911	0.129266	0.167981	0.83032	0.892106	0.520586	0.833069	0.167811	0.037526	0.464958	0.838154	0.999844
ENSFDAG00000004710	ENSFDAG00000004710	-0.136075	-0.12876	0.0143153	0.183523	0.287187	0.126829	-0.140878	0.112185	0.0259948	0.00124437	0.0290495	0.0371679	0.0251416	0.0326714	0.684548	0.424515	0.684881	0.281585	0.13632	0.423782	0.435745	0.727325	0.999844
ENSFDAG00000004711	PRPF8	0.181644	-0.189465	-0.0172796	0.107314	0.040422	0.0115794	0.136126	0.0704689	0.0163286	0.000781649	0.0182474	0.0233469	0.0157926	0.0205224	0.493811	0.138152	0.53654	0.426943	0.791359	0.926585	0.341998	0.766288	0.999844
ENSFDAG00000004713	ENSFDAG00000004713	0.1331	0.369177	-0.0357867	-0.0307882	0.225236	0.0697309	-0.132816	0.14459	0.0335034	0.00160381	0.0374405	0.0479038	0.0324037	0.0421085	0.726315	0.0437031	0.371534	0.873577	0.303437	0.698481	0.517475	0.84352	0.999844
ENSFDAG00000004720	RF00413	-0.634488	0.201527	0.054896	-0.151504	-0.462625	0.543085	0.270148	0.312033	0.0723021	0.0034611	0.0807985	0.103379	0.0699289	0.0908723	0.256017	0.453571	0.350763	0.594038	0.150196	0.0400035	0.370167	0.805944	0.999844
ENSFDAG00000004722	RNF38	0.30021	-0.113376	-0.0291034	0.0457323	-0.19045	-0.0309022	0.0875422	0.0760114	0.0176128	0.000843128	0.0196826	0.0251832	0.0170347	0.0221366	0.276201	0.392943	0.3162	0.744445	0.230093	0.812837	0.556273	0.82916	0.999844
ENSFDAG00000004723	ENSFDAG00000004723	0.197012	-0.230023	-0.0169415	0.35685	-0.0892732	0.0420712	-0.0700399	0.106286	0.0246278	0.00117894	0.0275219	0.0352134	0.0238195	0.0309533	0.545643	0.142717	0.621723	0.0314739	0.634262	0.785164	0.690556	0.447963	0.999844
ENSFDAG00000004724	ENSFDAG00000004724	-0.102788	0.128589	0.00403	-0.00176402	-0.096547	0.104646	0.00846854	0.0251678	0.0058317	0.000279164	0.006517	0.00833829	0.00564029	0.00732953	0.517038	0.0922078	0.809401	0.982567	0.290372	0.163502	0.921204	0.861287	0.999844
ENSFDAG00000004727	ENSFDAG00000004727	-0.303642	0.135318	0.0344162	-0.147103	0.0489096	-0.122088	-0.0195077	0.0430099	0.00996596	0.000477071	0.0111371	0.0142495	0.00963884	0.0125256	0.14316	0.175262	0.115097	0.163345	0.682007	0.213667	0.861627	0.654125	0.999844
ENSFDAG00000004728	ENSFDAG00000004728	1.25564	-0.72126	-0.100447	0.0165521	-0.2971	0.21855	-0.34923	1.04491	0.242119	0.0115903	0.270571	0.346187	0.234172	0.304306	0.219312	0.1427	0.350811	0.974615	0.613595	0.651536	0.526683	0.860841	0.999844
ENSFDAG00000004736	ENSFDAG00000004736	-0.106363	-0.0322204	0.0150534	0.131957	-0.0593109	-0.269532	0.16095	0.0852948	0.0197639	0.0009461	0.0220864	0.0282588	0.0191152	0.0248401	0.715716	0.818722	0.624556	0.374589	0.724221	0.0512368	0.307157	0.747717	0.999844
ENSFDAG00000004743	PPARG	0.141627	-0.863638	0.0310858	0.207804	-0.273611	-0.10761	0.000852493	0.0549363	0.0127295	0.00060936	0.0142253	0.0182009	0.0123116	0.0159989	0.545678	1.94e-14	0.207927	0.0814569	0.0425505	0.332133	0.994622	0.567662	0.999844
ENSFDAG00000004746	H2AFJ	1.196	-0.729745	-0.151576	1.06329	0.781456	0.509041	0.44282	1.40084	0.230752	0.0163235	0.319224	0.399224	0.225883	0.29589	0.312255	0.128727	0.235472	0.0598441	0.216165	0.284146	0.415604	0.526861	0.999844
ENSFDAG00000004749	RF01881	0.457984	-0.329412	-0.0382248	-0.192107	0.0401137	0.0772621	0.164716	0.0991097	0.022965	0.00109934	0.0256637	0.0328358	0.0222112	0.0288634	0.145735	0.0297251	0.248964	0.230459	0.824805	0.604167	0.33228	0.707536	0.999844
ENSFDAG00000004752	TLN2	0.0441087	-0.331922	0.0129602	-0.189026	0.0547988	0.00324232	0.147556	0.160585	0.0372097	0.00178123	0.0415823	0.0532032	0.0359884	0.0467667	0.912353	0.0853033	0.758782	0.353941	0.81221	0.986364	0.495036	0.743177	0.999844
ENSFDAG00000004755	ACTR3	0.0333417	0.0158507	0.000876404	-0.0410914	-0.054789	-0.136448	-0.0232831	0.0427378	0.00990291	0.000474053	0.0110666	0.0141594	0.00957786	0.0124464	0.871873	0.873447	0.967892	0.696086	0.645202	0.163249	0.834683	0.825038	0.999844
ENSFDAG00000004759	AGO2	-0.1773	-0.00556323	0.0189898	-0.221844	0.201691	0.166579	-0.006056	0.0435148	0.010083	0.000482672	0.0112678	0.0144168	0.009752	0.0126727	0.395356	0.955817	0.38739	0.0366257	0.0930004	0.091635	0.957098	0.470384	0.999844
ENSFDAG00000004761	SETD9	-0.285714	-0.0107105	0.0388692	-0.12884	-0.0623006	-0.0378106	-0.00937807	0.0545298	0.0126353	0.000604851	0.0141201	0.0180662	0.0122205	0.0158805	0.221129	0.92409	0.114003	0.278253	0.642999	0.732326	0.940677	0.727325	0.999844
ENSFDAG00000004763	CORO1A	1.48309	-0.580019	-0.166717	0.595482	-0.220161	0.358404	0.183622	0.568193	0.0834673	0.00671128	0.124672	0.154178	0.0820202	0.107574	0.0491237	0.0446822	0.0418445	0.0917009	0.575003	0.210772	0.575584	0.577128	0.999844
ENSFDAG00000004766	TERF2	-0.274181	0.0115709	0.0300031	0.114002	0.0552814	-0.113991	0.0578803	0.0539781	0.0125074	0.000598732	0.0139772	0.0178834	0.0120969	0.0157199	0.237949	0.917596	0.220135	0.334907	0.679325	0.30001	0.644337	0.742499	0.999844
ENSFDAG00000004771	RPS21	0.196613	0.148595	-0.0247799	-0.15637	0.0187619	0.00386997	-0.136781	0.135019	0.0312856	0.00149764	0.0349621	0.0447328	0.0302587	0.0393211	0.592597	0.400852	0.521966	0.402993	0.929314	0.98225	0.490331	0.758322	0.999844
ENSFDAG00000004774	MRM2	0.213067	0.059657	-0.0268358	0.0589243	-0.128871	-0.0381883	0.0334898	0.0562718	0.0130389	0.000624173	0.0145711	0.0186433	0.0126109	0.0163878	0.369082	0.60136	0.282759	0.625448	0.345258	0.73381	0.793623	0.809444	0.999844
ENSFDAG00000004782	RF00004	-0.395616	-0.412497	0.0733236	-0.190516	-0.0299573	-0.319358	0.325081	0.622278	0.14419	0.00690238	0.161134	0.206166	0.139457	0.181224	0.616011	0.277342	0.377474	0.635064	0.947396	0.392452	0.445087	0.810842	0.999844
ENSFDAG00000004787	NUP155	0.022111	-0.0537076	0.00154881	-0.120312	0.0736037	-0.116798	0.151356	0.0550481	0.0127554	0.0006106	0.0142543	0.0182379	0.0123367	0.0160315	0.924918	0.6344	0.950022	0.313591	0.58574	0.292998	0.231931	0.737499	0.999844
ENSFDAG00000004793	LRRC8D	-0.111681	-0.197763	0.025278	-0.00656466	0.0920409	-0.111696	-0.0211863	0.0545902	0.0126493	0.000605521	0.0141357	0.0180862	0.0122341	0.0158981	0.632654	0.0786827	0.304301	0.955968	0.493725	0.312572	0.866561	0.860841	0.999844
ENSFDAG00000004798	MBL2	-1.34376	0.630683	0.143894	-0.609562	-0.0785036	-0.0475756	0.0505679	0.307658	0.00973268	0.00392077	0.0517819	0.0550242	0.00983677	0.0128772	0.0154081	1.63e-10	0.02156	0.0073902	0.737877	0.63145	0.655873	0.289117	0.999844
ENSFDAG00000004804	TUBA8	-1.58054	0.235231	0.194271	-0.40624	-0.0142454	-0.660933	0.0671887	0.320727	0.0732075	0.00356582	0.0825484	0.105577	0.0708422	0.0921072	0.00525679	0.384631	0.00114062	0.157382	0.96503	0.0130208	0.824792	0.648382	0.999844
ENSFDAG00000004806	RF00004	-0.802029	0.341993	0.0366903	0.485612	0.663149	1.2379	-0.589966	0.685776	0.158903	0.00760671	0.177576	0.227203	0.153687	0.199716	0.332795	0.390931	0.673988	0.249164	0.164151	0.00159033	0.186788	0.715811	0.999844
ENSFDAG00000004809	NPC2	-0.244442	0.266011	0.0146217	0.352947	-0.123762	-0.0630726	-0.220325	0.0710869	0.0164718	0.000788505	0.0184074	0.0235517	0.0159311	0.0207024	0.35924	0.0382034	0.602569	0.00928333	0.419983	0.61728	0.1257	0.312905	0.999844
ENSFDAG00000004810	ENSFDAG00000004810	0.0913716	0.194717	-0.0270743	0.268665	-0.170973	0.128355	-0.00431821	0.0544896	0.0126259	0.000604405	0.0141097	0.0180528	0.0122115	0.0158688	0.695479	0.0831147	0.27078	0.02371	0.203198	0.245431	0.972654	0.411451	0.999844
ENSFDAG00000004825	PYGL	1.16698	-0.712835	-0.118878	0.521074	-0.0436887	0.223645	0.155502	0.375731	0.0384782	0.00458361	0.0745211	0.0886402	0.0382143	0.0501853	0.0569341	0.000279093	0.0791081	0.056288	0.883336	0.252602	0.487594	0.518482	0.999844
ENSFDAG00000004826	ENSFDAG00000004826	-0.15225	0.210391	0.00962273	0.0379814	-0.0444882	-0.0251408	-0.118588	0.0477238	0.0110582	0.000529358	0.0123577	0.0158113	0.0106953	0.0138984	0.485845	0.0454239	0.675773	0.732602	0.723487	0.807929	0.314462	0.826388	0.999844
ENSFDAG00000004828	HAUS1	0.45637	0.201539	-0.0701139	0.0383396	0.138528	0.141739	0.0148162	0.106293	0.0246294	0.00117901	0.0275237	0.0352156	0.023821	0.0309552	0.161574	0.199072	0.0411563	0.817239	0.460397	0.358436	0.932889	0.838154	0.999844
ENSFDAG00000004830	TNFSF4	-0.482235	1.58507	-0.00739476	0.0499387	-0.12357	-0.372724	-0.477107	0.238272	0.0552108	0.00264295	0.0616988	0.0789416	0.0533987	0.0693913	0.323191	1.52e-11	0.885627	0.840661	0.66008	0.106755	0.0701116	0.838952	0.999844
ENSFDAG00000004832	CNN1	0.128056	-1.01015	0.0301482	-0.0990513	0.477602	0.190917	-0.0441714	0.835023	0.193486	0.00926218	0.216223	0.27665	0.187135	0.243181	0.888552	0.0216484	0.754083	0.831315	0.363861	0.658972	0.928627	0.838154	0.999844
ENSFDAG00000004834	PTPN12	0.234006	-0.212079	-0.00796483	-0.122314	-0.0820759	-0.10272	-0.0814896	0.0339823	0.00787414	0.000376936	0.00879945	0.0112586	0.00761569	0.00989655	0.204295	0.0168486	0.681627	0.192263	0.439213	0.239171	0.412704	0.677863	0.999844
ENSFDAG00000004836	MAPK1IP1L	0.411942	-0.289632	-0.0426596	-0.035023	-0.0283229	0.159405	0.337061	0.334895	0.0775994	0.00371469	0.0867183	0.110953	0.0750524	0.0975302	0.476564	0.298468	0.48397	0.905329	0.932238	0.560661	0.280457	0.851178	0.999844
ENSFDAG00000004837	RF00004	0.00751223	-0.302574	0.00973364	0.389417	0.565391	-0.0995393	-0.41421	0.60233	0.139568	0.00668111	0.155969	0.199557	0.134987	0.175415	0.992277	0.417989	0.905209	0.324111	0.205636	0.786449	0.322673	0.739668	0.999844
ENSFDAG00000004839	MYC	1.61209	-0.356327	-0.176754	0.237318	0.238632	0.000450059	0.0101542	0.311952	0.0212745	0.00389132	0.0569785	0.0648427	0.0213153	0.0279713	0.00389759	0.0145668	0.00460426	0.320124	0.348694	0.99754	0.951587	0.738574	0.999844
ENSFDAG00000004843	NIPA1	-0.20839	-0.0259253	0.0135966	0.264297	0.0638479	-0.0143485	0.237656	0.0972796	0.0225409	0.00107904	0.0251898	0.0322295	0.0218011	0.0283304	0.504046	0.862904	0.678936	0.095863	0.722104	0.922585	0.157961	0.586743	0.999844
ENSFDAG00000004844	ENSFDAG00000004844	-0.811124	-0.113004	0.0906479	0.181771	0.0807371	-0.085506	-0.269271	0.5657	0.0172462	0.0072141	0.0950336	0.100719	0.0174343	0.0228208	0.280839	0.389516	0.285859	0.555433	0.799187	0.517256	0.0746711	0.796892	0.999844
ENSFDAG00000004846	EMILIN1	0.155473	-0.35314	-0.00572013	0.338228	-0.142155	0.043124	0.0623637	0.488564	0.113207	0.00541921	0.12651	0.161865	0.109491	0.142283	0.823979	0.293916	0.938064	0.341642	0.723838	0.896309	0.868683	0.742729	0.999844
ENSFDAG00000004847	RF00213	0.737121	0.0133893	-0.056748	-0.41218	-0.494745	-0.557659	-0.0511339	0.710308	0.164588	0.00787883	0.183929	0.235331	0.159185	0.206861	0.381785	0.973672	0.522614	0.336509	0.307793	0.1622	0.910485	0.742729	0.999844
ENSFDAG00000004852	RF00026	0.0128694	0.555197	-0.0351574	0.34542	-0.24991	0.412255	-0.45774	0.619441	0.143532	0.00687091	0.160399	0.205226	0.138821	0.180398	0.986954	0.142797	0.671464	0.388426	0.581185	0.268526	0.281161	0.752062	0.999844
ENSFDAG00000004854	RF00004	0.998382	0.100591	-0.108006	0.539968	0.33896	-0.656117	-0.719831	0.785855	0.182093	0.0087168	0.203491	0.26036	0.176116	0.228862	0.26007	0.813642	0.247341	0.231305	0.506501	0.117949	0.132407	0.707878	0.999844
ENSFDAG00000004855	RF00139	-0.272805	-0.538163	0.0503237	0.674457	0.351276	-0.393228	-0.0109852	0.452196	0.10478	0.00501582	0.117093	0.149816	0.101341	0.131692	0.684974	0.0964023	0.477356	0.0487226	0.364118	0.21674	0.975851	0.498478	0.999844
ENSFDAG00000004856	BIN3	0.271288	-0.0525211	-0.029129	0.0281386	-0.0535973	0.0212727	-0.00380711	0.0497114	0.0115188	0.000551405	0.0128724	0.0164698	0.0111407	0.0144773	0.223697	0.624585	0.214797	0.804125	0.676213	0.840274	0.974758	0.838154	0.999844
ENSFDAG00000004858	RF00213	-0.433684	0.828178	-0.0155653	0.775404	-0.419237	0.708091	-0.244809	0.43607	0.101043	0.00483694	0.112917	0.144473	0.0977265	0.126995	0.511346	0.00917734	0.822908	0.0210249	0.270037	0.0235079	0.492106	0.396479	0.999844
ENSFDAG00000004860	ATAD3A	0.635695	-0.407537	-0.0662852	0.131314	0.078994	0.227027	0.261033	0.26956	0.0624606	0.00299	0.0698005	0.0893075	0.0604105	0.0785031	0.220804	0.102961	0.225428	0.619168	0.791524	0.355653	0.351518	0.808666	0.999844
ENSFDAG00000004862	RPS2	-0.0470319	-0.0266455	0.0150401	-0.292037	0.110901	-0.0968364	-0.0352253	0.127028	0.0294341	0.00140901	0.032893	0.0420855	0.028468	0.036994	0.895016	0.876577	0.688658	0.107348	0.588788	0.566014	0.854686	0.601961	0.999844
ENSFDAG00000004871	RF00263	0.409752	-0.371285	-0.0377675	-0.0307281	0.346849	-0.00347775	0.257263	0.536323	0.124273	0.00594896	0.138877	0.177688	0.120194	0.156192	0.575813	0.292241	0.624372	0.934284	0.410603	0.991996	0.515078	0.856248	0.999844
ENSFDAG00000004872	DAPP1	2.88808	-1.05601	-0.265143	-0.704629	-1.32793	-0.128355	0.061302	0.770071	0.0847704	0.00934424	0.155512	0.186461	0.0840276	0.110346	0.00099788	0.000286733	0.00609015	0.0739677	0.00210327	0.657914	0.853588	0.558289	0.4767
ENSFDAG00000004874	ENSFDAG00000004874	0.510305	-0.175627	-0.0594192	0.111316	-0.0177207	0.048793	0.232303	0.146581	0.0339646	0.00162589	0.0379559	0.0485633	0.0328498	0.0426882	0.182571	0.340607	0.140588	0.567749	0.935909	0.787768	0.260865	0.80124	0.999844
ENSFDAG00000004878	ENSFDAG00000004878	0.345765	-0.0542369	-0.0364335	0.28056	-0.0593674	0.0310186	-0.309515	0.125115	0.0289907	0.00138779	0.0323975	0.0414515	0.0280391	0.0364367	0.32831	0.750074	0.328074	0.119061	0.770597	0.853039	0.104914	0.616673	0.999844
ENSFDAG00000004887	TLE4	-0.02979	0.581456	-0.0296834	0.0642346	0.155588	0.116359	-0.222711	0.0710624	0.0164661	0.000788233	0.0184011	0.0235436	0.0159256	0.0206953	0.911021	5.86e-06	0.290387	0.635835	0.31058	0.356506	0.121592	0.810996	0.999844
ENSFDAG00000004890	ABCD2	-0.800155	-0.708889	0.152846	-0.795324	0.1063	-0.454948	0.154828	0.321632	0.0745264	0.00356758	0.0832842	0.106559	0.0720802	0.0936679	0.158276	0.00941211	0.0104979	0.00585313	0.744697	0.0901612	0.612936	0.267161	0.999844
ENSFDAG00000004893	GCN1	0.556451	-0.313553	-0.0553817	-0.011191	-0.0386005	0.0863712	0.258501	0.149159	0.0345621	0.00165449	0.0386236	0.0494176	0.0334277	0.0434391	0.149643	0.0916818	0.173339	0.95459	0.862148	0.636637	0.214869	0.860841	0.999844
ENSFDAG00000004907	MAPRE2	0.253815	-0.121686	-0.0307394	0.116792	-0.00925344	0.12057	0.0777109	0.0874949	0.0202737	0.000970504	0.0226561	0.0289878	0.0196083	0.0254808	0.390851	0.39276	0.323776	0.437791	0.956657	0.389219	0.626381	0.768006	0.999844
ENSFDAG00000004909	RF00026	-0.383669	0.304175	0.00501257	0.466528	-0.807556	0.770994	0.291121	0.684888	0.158697	0.00759686	0.177346	0.226909	0.153489	0.199458	0.642932	0.445135	0.954139	0.267943	0.0900183	0.0490744	0.514497	0.722133	0.999844
ENSFDAG00000004916	RF00604	0.969774	-0.510478	-0.0975382	-0.158082	-0.412568	0.338143	0.623728	0.895736	0.207554	0.00993561	0.231944	0.296764	0.200741	0.260862	0.305523	0.262501	0.327808	0.74273	0.448848	0.450421	0.222007	0.829018	0.999844
ENSFDAG00000004917	COG4	0.048951	-0.1143	-0.00351689	0.0878193	0.0128645	-0.0495565	0.114081	0.0509824	0.0118133	0.000565503	0.0132015	0.0168909	0.0114255	0.0148474	0.828367	0.292973	0.882429	0.444674	0.921151	0.64292	0.349148	0.769216	0.999844
ENSFDAG00000004920	ENSFDAG00000004920	-0.160109	0.0312886	0.0215895	0.0933494	-0.112721	-0.145407	-0.057544	0.0336042	0.00778653	0.000372742	0.00870155	0.0111333	0.00753096	0.00978644	0.382439	0.722904	0.263461	0.316961	0.285385	0.093825	0.560779	0.738244	0.999844
ENSFDAG00000004922	KLF12	-0.0422252	-0.0289595	0.0274842	-0.0768112	0.16305	-0.360173	-0.596843	0.273727	0.0634262	0.00303622	0.0708796	0.0906881	0.0613444	0.0797167	0.935675	0.908454	0.617928	0.772955	0.588209	0.145891	0.0345233	0.832796	0.999844
ENSFDAG00000004924	CUTC	-0.378272	0.225131	0.0396974	-0.0335267	-0.236051	0.0214092	-0.165585	0.0800667	0.0185525	0.00088811	0.0207327	0.0265268	0.0179436	0.0233176	0.181277	0.0983616	0.182836	0.815883	0.147249	0.873018	0.278199	0.838154	0.999844
ENSFDAG00000004929	RF00575	0.754047	0.179018	-0.0887484	-0.902166	0.242348	0.445917	-0.117814	0.714233	0.165497	0.00792236	0.184945	0.236631	0.160065	0.208004	0.372268	0.659901	0.318722	0.0359225	0.618344	0.265036	0.796159	0.468019	0.999844
ENSFDAG00000004931	MMP2	-0.230105	-0.296301	0.0446876	-0.178188	0.363752	-0.162302	-0.00862548	0.0928979	0.0215257	0.00103043	0.0240552	0.0307778	0.0208191	0.0270543	0.450273	0.0434299	0.163886	0.250607	0.0381337	0.260654	0.958178	0.716309	0.988944
ENSFDAG00000004935	ENSFDAG00000004935	0.203124	-0.087331	-0.0229337	-0.102121	0.00920981	0.240766	-0.0226727	0.0551662	0.0127827	0.00061191	0.0142848	0.018277	0.0123631	0.0160659	0.387138	0.439862	0.353871	0.392865	0.945687	0.0303602	0.858035	0.7547	0.999844
ENSFDAG00000004937	RF00069	0.161046	-0.187137	-0.013582	-0.123831	-0.266392	0.267919	0.262232	0.164114	0.0380274	0.00182038	0.0424961	0.0543724	0.0367793	0.0477945	0.690972	0.337233	0.750231	0.548043	0.253273	0.162408	0.230337	0.794987	0.999844
ENSFDAG00000004938	SLC38A10	0.962349	-0.3777	-0.0999759	0.273052	-0.0787901	0.306408	-0.0214243	0.644224	0.149275	0.00714581	0.166817	0.213437	0.144376	0.187615	0.230533	0.328281	0.236934	0.503791	0.864582	0.420009	0.960551	0.785983	0.999844
ENSFDAG00000004944	IL6ST	-0.168186	-0.339341	0.0245579	0.342983	0.326413	0.0285631	-0.0423081	0.117933	0.0273267	0.00130813	0.0305379	0.0390723	0.0264298	0.0343453	0.624314	0.0400941	0.497142	0.0496816	0.098672	0.860534	0.81942	0.498478	0.999844
ENSFDAG00000004945	SCAMP3	-0.0885045	-0.0757699	0.0142142	-0.00591887	-0.0538439	-0.0441807	0.108787	0.125876	0.029167	0.00139623	0.0325946	0.0417037	0.0282097	0.0366584	0.803008	0.657288	0.703646	0.973847	0.792039	0.792514	0.569908	0.860841	0.999844
ENSFDAG00000004947	DNAJC18	-0.126434	0.100168	0.0146414	-0.0950543	-0.111382	0.016316	-0.0837745	0.0349375	0.00809546	0.00038753	0.00904678	0.0115751	0.00782974	0.0101747	0.498774	0.265583	0.457024	0.317617	0.300543	0.853706	0.406244	0.738574	0.999844
ENSFDAG00000004949	TRA2A	-0.263475	0.0692267	0.030119	0.163759	-0.288307	-0.142827	0.00935437	0.28688	0.0664739	0.00318211	0.0742855	0.0950458	0.0642921	0.0835472	0.622781	0.788313	0.593392	0.547952	0.349703	0.573237	0.974183	0.794987	0.999844
ENSFDAG00000004951	ENSFDAG00000004951	0.0396625	0.0154537	0.00316027	-0.146786	-0.272996	-0.0250617	-0.0307378	0.0950135	0.0220159	0.0010539	0.024603	0.0314787	0.0212932	0.0276705	0.897617	0.917049	0.922451	0.349369	0.123883	0.863636	0.853398	0.742925	0.999844
ENSFDAG00000004952	STXBP5	0.0840902	-0.0889243	-0.00181705	-0.106929	0.069373	-0.0725796	-0.00764835	0.0941817	0.0218231	0.00104467	0.0243876	0.0312032	0.0211068	0.0274282	0.784079	0.547206	0.955168	0.493521	0.694521	0.617373	0.963166	0.783985	0.999844
ENSFDAG00000004953	COL18A1	-0.519217	-0.213301	0.076125	-0.236131	0.038232	-0.0857483	0.0778907	0.116158	0.0269153	0.00128844	0.0300781	0.038484	0.0260318	0.0338282	0.127649	0.193549	0.0339402	0.173345	0.84548	0.595098	0.671936	0.66367	0.999844
ENSFDAG00000004956	RF00493	0.292539	0.375666	-0.0697832	0.124007	-0.113343	0.442058	0.141502	0.564656	0.130838	0.00626323	0.146213	0.187075	0.126544	0.164443	0.697049	0.299006	0.377905	0.745708	0.793281	0.213986	0.727131	0.829162	0.999844
ENSFDAG00000004957	POLI	-0.263485	0.0967043	0.033025	-0.1749	-0.0811321	-0.0822871	-0.0103821	0.0871336	0.02019	0.000966496	0.0225626	0.0288681	0.0195273	0.0253756	0.372065	0.496138	0.288104	0.244268	0.632998	0.555956	0.948035	0.713772	0.999844
ENSFDAG00000004959	ITGA11	-0.24762	-0.717337	0.0699319	-0.1025	-0.104445	-0.00238161	0.192403	0.533044	0.123513	0.00591259	0.138028	0.176602	0.119459	0.155237	0.734489	0.0412399	0.363104	0.78263	0.803719	0.994502	0.625315	0.833458	0.999844
ENSFDAG00000004960	RFC4	0.331424	0.112492	-0.0548753	0.0404026	0.137206	0.185619	0.136945	0.0637196	0.0147647	0.000706785	0.0164997	0.0211108	0.01428	0.0185568	0.189201	0.354556	0.039007	0.753113	0.345005	0.120349	0.314754	0.830794	0.999844
ENSFDAG00000004967	RF01268	0.767332	0.289319	-0.0806505	-0.0518002	-0.127261	0.190212	-1.15944	0.566868	0.131351	0.00628777	0.146786	0.187808	0.127039	0.165087	0.308127	0.424702	0.309111	0.892451	0.769022	0.593573	0.00432269	0.846489	0.999844
ENSFDAG00000004976	ARHGEF1	1.2646	-0.292874	-0.148414	0.444796	-0.135564	0.435392	0.0233266	0.759057	0.175883	0.00841956	0.196552	0.251482	0.17011	0.221058	0.146641	0.484963	0.105782	0.315726	0.786908	0.291134	0.96043	0.737534	0.999844
ENSFDAG00000004978	RF00421	0.0743002	0.193182	-0.00140317	-0.0414549	-0.0126728	0.117	-0.917332	0.333598	0.077299	0.00370031	0.0863826	0.110524	0.0747618	0.0971526	0.897642	0.487161	0.981597	0.887833	0.969593	0.668722	0.00324983	0.845437	0.999844
ENSFDAG00000004983	ELOC	-0.216324	0.199785	0.0188637	-0.132065	-0.00944276	0.0657368	-0.126938	0.0428223	0.00992248	0.00047499	0.0110885	0.0141874	0.00959679	0.012471	0.295853	0.0448951	0.386744	0.209787	0.936812	0.502198	0.25567	0.68737	0.999844
ENSFDAG00000004984	MIEF2	0.630187	-0.213075	-0.0797298	0.31722	0.317781	-0.025878	0.274576	0.433476	0.100442	0.00480817	0.112245	0.143614	0.0971452	0.12624	0.338484	0.501381	0.250217	0.343721	0.401722	0.93383	0.439643	0.742729	0.999844
ENSFDAG00000004985	CMC2	-0.0131939	0.289564	-0.0109465	-0.119975	-0.0290409	0.0994655	-0.0702509	0.056159	0.0130128	0.000622922	0.0145419	0.0186059	0.0125856	0.016355	0.9556	0.011136	0.660958	0.319785	0.831402	0.375287	0.582785	0.738574	0.999844
ENSFDAG00000004991	C19orf67	0.128317	-0.221521	0.00395794	-0.380905	0.0721057	-0.0908335	0.117536	0.164926	0.0382155	0.00182938	0.0427063	0.0546414	0.0369612	0.0480309	0.752029	0.257144	0.926271	0.065301	0.757727	0.636592	0.591749	0.536462	0.999844
ENSFDAG00000004992	XRCC3	0.595983	-0.538085	-0.0747715	0.20427	0.110303	0.306966	0.93247	0.720447	0.166937	0.00799128	0.186554	0.23869	0.161457	0.209813	0.482583	0.18785	0.402915	0.63626	0.821379	0.444901	0.0417784	0.811124	0.999844
ENSFDAG00000004993	GFM2	-0.237265	0.0531642	0.0212513	0.0832443	-0.0224355	0.0278601	0.0412151	0.0409232	0.00948244	0.000453925	0.0105967	0.0135582	0.00917119	0.0119179	0.24085	0.585095	0.318544	0.418708	0.84721	0.771115	0.705777	0.762477	0.999844
ENSFDAG00000004994	BSG	-0.130569	-0.00639371	0.0188816	-0.0612707	-0.0119392	-0.03039	-0.0510205	0.0486272	0.0112676	0.000539379	0.0125916	0.0161106	0.0108977	0.0141615	0.553777	0.95197	0.416216	0.585049	0.925059	0.770965	0.668116	0.804309	0.999844
ENSFDAG00000005003	ENSFDAG00000005003	1.81734	-1.63497	-0.133846	0.86746	-1.38788	-0.243982	0.628914	1.84642	0.427838	0.0204807	0.478115	0.611732	0.413795	0.537725	0.181082	0.0124337	0.349653	0.209647	0.0759845	0.704476	0.391085	0.68737	0.999844
ENSFDAG00000005004	INTS7	0.117533	-0.0471431	-0.0137764	-0.0406592	0.0578357	-0.00975344	0.114996	0.0214582	0.00497214	0.000238017	0.00555643	0.00710927	0.00480894	0.00624919	0.422352	0.50377	0.37188	0.585438	0.492754	0.888148	0.145756	0.804309	0.999844
ENSFDAG00000005005	SIX1	-0.813461	0.351916	0.0807454	-0.231313	0.0740899	-0.0932551	0.0208536	0.154045	0.0356941	0.00170868	0.0398887	0.0510362	0.0345226	0.0448619	0.0382105	0.0625057	0.0507743	0.246792	0.742943	0.615735	0.92157	0.714446	0.999844
ENSFDAG00000005010	RF00281	0.0189829	-0.267265	0.0222387	-0.266761	-0.526375	0.113916	0.0575822	0.385829	0.0894015	0.00427966	0.0999074	0.127828	0.0864671	0.112364	0.97562	0.371396	0.7339	0.398689	0.140953	0.698461	0.86361	0.755736	0.999844
ENSFDAG00000005011	IGHMBP2	0.565556	-0.186404	-0.0616181	0.21954	0.0614708	0.139465	-0.122554	0.267506	0.0619847	0.00296721	0.0692687	0.088627	0.0599502	0.077905	0.274185	0.454032	0.257976	0.404196	0.836413	0.568949	0.660602	0.758713	0.999844
ENSFDAG00000005014	RAP1GDS1	-0.243441	0.0989705	0.0244623	-0.0591273	0.0856745	-0.0848665	0.0418533	0.0433937	0.0100549	0.000481328	0.0112365	0.0143767	0.00972486	0.0126374	0.242549	0.323643	0.264848	0.576985	0.474898	0.389466	0.709665	0.803968	0.999844
ENSFDAG00000005016	IL7R	0.313427	-0.0196636	-0.0721683	1.14298	1.30808	0.260457	0.11082	0.67076	0.0588568	0.00826386	0.128458	0.150207	0.058672	0.0770406	0.701946	0.9354	0.427265	0.00142749	0.000737849	0.28225	0.689701	0.158749	0.393265
ENSFDAG00000005017	RF00093	-0.0359248	0.739955	-0.0659153	0.606839	-0.536315	0.889173	0.245996	0.494968	0.114691	0.00549025	0.128168	0.163987	0.110926	0.144148	0.959275	0.0288926	0.373685	0.0900653	0.185374	0.00759091	0.517035	0.574125	0.999844
ENSFDAG00000005018	FAM172A	0.114758	-0.0294623	-0.0151072	0.0685868	0.0743744	0.0313408	0.0223106	0.0516204	0.0119611	0.000572579	0.0133667	0.0171022	0.0115685	0.0150332	0.613493	0.78763	0.527816	0.553022	0.569547	0.770755	0.855611	0.796576	0.999844
ENSFDAG00000005022	ENSFDAG00000005022	-0.00131812	-0.322536	0.0270069	-0.370693	0.0805029	-0.253231	0.167489	0.0984387	0.0228095	0.00109189	0.0254899	0.0326135	0.0220609	0.028668	0.996648	0.032712	0.413754	0.0202424	0.655762	0.0882085	0.322562	0.38964	0.999844
ENSFDAG00000005023	RF01955	0.530776	0.0420047	-0.0616071	-0.191111	-0.200238	0.316513	-0.155191	0.499216	0.115675	0.00553736	0.129268	0.165394	0.111878	0.145385	0.452521	0.901708	0.407726	0.595041	0.622463	0.344006	0.684	0.806016	0.999844
ENSFDAG00000005024	ARSA	0.646136	-0.253631	-0.0675042	0.101713	-0.0401009	0.153723	0.0648357	0.249933	0.0579127	0.00277229	0.0647182	0.0828048	0.0560118	0.0727871	0.196203	0.291911	0.199818	0.68929	0.889169	0.515997	0.810083	0.823133	0.999844
ENSFDAG00000005026	OSR2	-0.133058	-0.292237	0.0220994	-0.443944	0.967063	0.1374	-0.0405621	0.645997	0.149686	0.00716547	0.167276	0.214024	0.144773	0.188131	0.868512	0.450043	0.794038	0.277721	0.0365843	0.718015	0.925493	0.727212	0.974784
ENSFDAG00000005027	RF00093	0.402992	-0.0712318	-0.0484602	-0.313649	-0.199428	0.432456	0.24551	0.557622	0.129208	0.00618521	0.144392	0.184745	0.124967	0.162394	0.589426	0.842915	0.537776	0.409135	0.642661	0.221205	0.54237	0.759683	0.999844
ENSFDAG00000005030	RNH1	0.210027	-0.189173	-0.0197604	0.0515445	-0.0663536	0.0824475	0.157102	0.0783688	0.0181591	0.000869276	0.020293	0.0259642	0.017563	0.0228231	0.453107	0.160371	0.502717	0.717476	0.680492	0.53386	0.298382	0.826038	0.999844
ENSFDAG00000005034	ENSFDAG00000005034	0.173085	-0.33475	-0.00524216	-0.462619	0.164974	0.0756986	0.379374	0.135117	0.0313084	0.00149874	0.0349876	0.0447654	0.0302808	0.0393498	0.637731	0.0585093	0.892288	0.0133893	0.435551	0.663551	0.055815	0.350635	0.999844
ENSFDAG00000005037	CDC42EP3	0.0310572	-0.194022	0.0129963	-0.0388429	-0.171171	-0.110989	-0.0076638	0.0381245	0.00883395	0.000422882	0.00987205	0.012631	0.00854399	0.0111029	0.873622	0.0389893	0.527395	0.695843	0.127748	0.229853	0.942019	0.825038	0.999844
ENSFDAG00000005038	ZC2HC1A	-0.666708	0.0466709	0.0868887	-0.134963	-0.160565	-0.243023	-0.0473507	0.155299	0.0359848	0.00172259	0.0402135	0.0514518	0.0348037	0.0452272	0.0906824	0.80566	0.036305	0.500933	0.479028	0.192687	0.823806	0.784876	0.999844
ENSFDAG00000005040	RF00133	0.387483	-0.329474	-0.0328484	-0.187172	0.269439	-0.22451	0.505357	0.563562	0.130585	0.00625109	0.14593	0.186713	0.126298	0.164124	0.605744	0.361902	0.6778	0.624156	0.532921	0.527559	0.212244	0.809444	0.999844
ENSFDAG00000005043	RF01956	0.379677	-0.0874209	-0.017986	-0.40744	-0.359535	0.00551281	-0.393776	0.511155	0.118441	0.00566979	0.13236	0.16935	0.114554	0.148862	0.595382	0.799482	0.811211	0.262749	0.382297	0.987005	0.307443	0.71959	0.999844
ENSFDAG00000005046	COA5	-0.0587599	-0.0328188	0.00647608	0.25919	-0.0492947	0.00226878	-0.122148	0.0477902	0.0110736	0.000530095	0.0123749	0.0158333	0.0107101	0.0139178	0.788092	0.755137	0.778497	0.0198088	0.695239	0.98251	0.30049	0.387594	0.999844
ENSFDAG00000005047	RF01290	-0.110062	-0.549465	0.0124864	0.651134	0.0572527	0.149078	0.464449	0.589262	0.13654	0.00653616	0.152585	0.195227	0.132058	0.171609	0.885992	0.137015	0.877258	0.0955302	0.896902	0.681635	0.262219	0.586407	0.999844
ENSFDAG00000005048	CA11	-0.664086	0.422161	0.0514303	0.202801	0.152936	0.0144934	-0.148771	0.26916	0.0623678	0.00298555	0.0696968	0.0891748	0.0603207	0.0783865	0.200536	0.0909455	0.346575	0.442379	0.608552	0.952943	0.595161	0.768763	0.999844
ENSFDAG00000005049	RF00133	0.237814	-0.567333	0.00107641	-0.376282	0.254907	0.41996	-0.277757	0.577904	0.133908	0.00641018	0.149644	0.191464	0.129513	0.168301	0.754409	0.121053	0.989273	0.330697	0.560191	0.243231	0.498373	0.740958	0.999844
ENSFDAG00000005052	TMEM181	-0.0765248	-0.166557	0.0140186	0.128571	0.112073	-0.072778	0.0284798	0.0383884	0.0088951	0.000425809	0.00994039	0.0127184	0.00860314	0.0111797	0.696113	0.0773984	0.496914	0.197203	0.320337	0.432663	0.787658	0.678929	0.999844
ENSFDAG00000005053	SHISA4	-0.527396	-0.167314	0.0811216	-0.39159	0.216797	-0.22622	0.033826	0.172054	0.0398672	0.00190844	0.0445521	0.0570029	0.0385586	0.0501068	0.203563	0.402051	0.0633205	0.0635633	0.363858	0.249303	0.879886	0.533669	0.999844
ENSFDAG00000005054	GALE	0.0685794	-0.229932	-0.00422679	-0.0694355	-0.0325668	0.270364	0.187273	0.139182	0.0322503	0.00154382	0.0360401	0.0461121	0.0311917	0.0405335	0.854151	0.200417	0.914333	0.714549	0.879456	0.125809	0.352277	0.826038	0.999844
ENSFDAG00000005056	SNRNP27	-0.0534721	0.242841	-0.0056836	0.00236994	0.0610331	0.0410135	-0.126533	0.0380445	0.0088154	0.000421994	0.00985132	0.0126044	0.00852605	0.0110796	0.783973	0.00969754	0.782029	0.98095	0.586696	0.656917	0.229323	0.861287	0.999844
ENSFDAG00000005060	UPRT	-0.0732019	-0.0818893	0.0153703	-0.0993514	-0.024435	-0.0398175	0.0435636	0.0322731	0.0074781	0.000357977	0.00835688	0.0106923	0.00723265	0.0093988	0.683659	0.343659	0.416579	0.277123	0.813195	0.639646	0.653177	0.727212	0.999844
ENSFDAG00000005063	IFRD2	0.134629	-0.170997	-0.00874315	-0.130696	0.0709343	0.0144522	0.170465	0.0292827	0.00678517	0.000324807	0.00758251	0.00970158	0.00656246	0.00852789	0.431433	0.0379024	0.627586	0.133377	0.47142	0.858407	0.0649032	0.629583	0.999844
ENSFDAG00000005067	RPS13	0.15546	-0.00332509	-0.0118828	-0.179845	0.000216411	-0.0614025	-0.0280018	0.049715	0.0115196	0.000551445	0.0128733	0.016471	0.0111415	0.0144783	0.48566	0.975285	0.612841	0.112946	0.998655	0.560755	0.815982	0.608458	0.999844
ENSFDAG00000005074	RF01871	0.178227	0.0209415	-0.0259617	-0.0747014	0.0886965	0.188821	-0.0198022	0.129757	0.0300664	0.00143928	0.0335995	0.0429895	0.0290795	0.0377887	0.620758	0.903871	0.493772	0.683617	0.668808	0.268173	0.918862	0.821814	0.999844
ENSFDAG00000005076	ZNF638	-0.046554	0.0853827	0.000253988	0.0529048	0.0951134	-0.0586704	-0.0401627	0.0652141	0.015111	0.000723363	0.0168867	0.021606	0.014615	0.0189921	0.855348	0.487317	0.992465	0.68392	0.517583	0.627456	0.770721	0.821814	0.999844
ENSFDAG00000005087	AP3M1	-0.129902	-0.236139	0.0251255	-0.0199708	0.0729642	-0.0167195	0.0839172	0.029899	0.00692799	0.000331643	0.00774211	0.00990578	0.00670059	0.00870738	0.452499	0.00455359	0.167684	0.820448	0.463495	0.838156	0.36849	0.838154	0.999844
ENSFDAG00000005088	ENSFDAG00000005088	-0.542705	0.38738	0.0477011	-0.305216	-0.442443	0.374132	-0.00360589	0.209135	0.0484594	0.00231976	0.054154	0.0692883	0.0468688	0.0609058	0.235336	0.0784521	0.321982	0.189665	0.0927932	0.0839605	0.988342	0.676663	0.999844
ENSFDAG00000005090	RF00091	-0.661075	0.312873	0.0211034	0.62285	-0.292953	0.962771	0.282086	0.572919	0.132753	0.00635488	0.148353	0.189813	0.128395	0.166849	0.382455	0.390501	0.79122	0.105858	0.501322	0.0072123	0.489824	0.599116	0.999844
ENSFDAG00000005093	WDR61	-0.0387873	0.117717	-0.000751143	-0.0623464	0.0596506	0.0329406	-0.0553105	0.0239775	0.00555591	0.000265962	0.0062088	0.00794396	0.00537355	0.0069829	0.80221	0.114271	0.963263	0.428805	0.503328	0.653167	0.508038	0.766288	0.999844
ENSFDAG00000005095	MMP11	-0.0751581	-0.243769	0.005121	0.623907	-0.302838	0.267671	0.0398717	0.442404	0.102511	0.0049072	0.114557	0.146572	0.0991461	0.12884	0.910033	0.446438	0.941724	0.0652771	0.428936	0.395277	0.911552	0.536462	0.999844
ENSFDAG00000005096	RF00593	0.394835	-0.363686	-0.0411156	0.206605	0.672443	0.0408862	-0.0196213	0.701774	0.16261	0.00778416	0.181719	0.232503	0.157273	0.204375	0.637411	0.367116	0.641204	0.627915	0.163145	0.917885	0.965381	0.809444	0.999844
ENSFDAG00000005098	PFDN6	0.105708	-0.0119975	-0.00843556	-0.0935829	0.0907663	-0.0492721	-0.0559725	0.0928376	0.0215117	0.00102976	0.0240396	0.0307578	0.0208056	0.0270368	0.728642	0.934806	0.792649	0.546125	0.604777	0.732656	0.733551	0.794697	0.999844
ENSFDAG00000005102	SRFBP1	0.0619274	0.175265	-0.01899	0.070675	0.0507634	0.0851133	-0.0812726	0.0487993	0.0113074	0.000541287	0.0126362	0.0161676	0.0109363	0.0142116	0.779221	0.0993092	0.41437	0.529532	0.68972	0.415711	0.4954	0.791153	0.999844
ENSFDAG00000005103	TBC1D10A	-0.00848248	-0.403852	0.015431	0.140589	0.00519159	-0.00447201	0.233459	0.277102	0.0642082	0.00307365	0.0717535	0.0918063	0.0621007	0.0806996	0.987143	0.110986	0.780756	0.599692	0.98633	0.985682	0.411182	0.806406	0.999844
ENSFDAG00000005105	RF00593	-0.547007	-0.198923	0.0427405	0.120979	0.174237	0.976678	0.125314	0.399876	0.0926565	0.00443547	0.103545	0.132482	0.0896152	0.116455	0.387023	0.513432	0.521032	0.706943	0.632153	0.00110405	0.713457	0.825346	0.999844
ENSFDAG00000005106	ZNF281	0.0469207	-0.0802145	-0.00146289	0.0671418	-0.0632578	-0.0764443	0.0535101	0.0353167	0.00818334	0.000391737	0.00914498	0.0117007	0.00791474	0.0102852	0.802839	0.375228	0.94108	0.482614	0.558681	0.390194	0.597756	0.780886	0.999844
ENSFDAG00000005113	VPS37A	0.00946409	0.0154293	-0.00500555	0.151366	0.0200717	-0.0318126	0.000735391	0.0430848	0.00998332	0.000477902	0.0111565	0.0142744	0.00965563	0.0125475	0.963633	0.877277	0.818891	0.151842	0.866584	0.746128	0.994762	0.646504	0.999844
ENSFDAG00000005116	PFN4	0.151274	-0.0150028	-0.0220388	0.0727335	-0.0738033	0.145659	0.0782332	0.07401	0.0171491	0.000820927	0.0191643	0.0245201	0.0165862	0.0215537	0.578171	0.90879	0.441779	0.599307	0.637413	0.258053	0.594116	0.806406	0.999844
ENSFDAG00000005117	PEMT	0.159431	-0.0829325	-0.0113975	-0.0390543	0.0169967	-0.0277168	-0.0392533	0.075599	0.0175173	0.000838553	0.0195758	0.0250466	0.0169423	0.0220164	0.562017	0.53092	0.693883	0.780143	0.914475	0.831374	0.791358	0.833353	0.999844
ENSFDAG00000005123	CTDSP2	0.623842	-0.192649	-0.0661771	-0.0485557	-0.0927503	0.0410307	0.202792	0.206962	0.0479558	0.00229565	0.0535912	0.0685682	0.0463817	0.0602728	0.170285	0.379009	0.167219	0.833866	0.723186	0.848904	0.408794	0.838154	0.999844
ENSFDAG00000005124	RF00266	-0.0342684	0.326778	0.0071178	0.32819	-0.295513	-0.479944	-0.519616	0.650456	0.150719	0.00721493	0.16843	0.215501	0.145772	0.18943	0.966108	0.399943	0.933218	0.423898	0.524399	0.208734	0.232528	0.765586	0.999844
ENSFDAG00000005126	CP	-0.1155	-0.341844	0.0333871	0.420883	-0.384189	-0.144709	-0.0989406	0.185874	0.0430695	0.00206174	0.0481307	0.0615816	0.0416558	0.0541315	0.788777	0.0995194	0.46216	0.0550539	0.121581	0.478314	0.670651	0.513731	0.999844
ENSFDAG00000005128	DDB1	1.37731	-0.302741	-0.157433	0.168061	0.171824	0.398537	0.0722079	0.524724	0.121585	0.0058203	0.135873	0.173845	0.117595	0.152814	0.0572542	0.385273	0.0390569	0.648439	0.680267	0.245161	0.853452	0.815058	0.999844
ENSFDAG00000005129	SPOCK3	-2.96437	1.72201	0.281426	-0.524506	-0.000270906	-0.111118	-0.107383	0.858681	0.0909006	0.0104502	0.1717	0.204982	0.0901989	0.118454	0.00137896	1.12e-08	0.00590578	0.205584	0.999523	0.711395	0.755037	0.685073	0.999844
ENSFDAG00000005130	SSH1	0.872327	0.0593971	-0.114341	0.384725	0.182528	0.00967125	-2.35e-05	0.597207	0.138381	0.00662429	0.154642	0.19786	0.133839	0.173923	0.258983	0.87314	0.160063	0.32791	0.681551	0.97891	0.999955	0.74009	0.999844
ENSFDAG00000005133	GCLC	-0.463514	0.224117	0.0474464	-0.0451301	0.110806	-0.16873	-0.0720296	0.0873022	0.020229	0.000968366	0.0226062	0.0289239	0.0195651	0.0254247	0.116709	0.115084	0.127335	0.764055	0.514702	0.227705	0.651461	0.831509	0.999844
ENSFDAG00000005136	MIOS	-0.160554	0.0355799	0.0122473	0.0344693	0.120088	0.0154248	0.0588679	0.109753	0.0254313	0.0012174	0.0284198	0.0363621	0.0245965	0.0319631	0.627936	0.823449	0.725579	0.837989	0.528853	0.921653	0.74195	0.838364	0.999844
ENSFDAG00000005139	SLC25A24	-0.218316	-0.0287742	0.0235916	0.0352187	0.0736687	0.0286977	0.0381565	0.048392	0.0112131	0.00053677	0.0125307	0.0160327	0.010845	0.014093	0.320988	0.785828	0.30855	0.753051	0.560696	0.782878	0.747896	0.830794	0.999844
ENSFDAG00000005140	NCK2	1.3801	-0.592866	-0.116404	-0.0756461	-0.283911	-0.118877	-0.150988	0.482554	0.111814	0.00535255	0.124954	0.159874	0.108144	0.140533	0.046953	0.0762291	0.111596	0.830548	0.477668	0.717732	0.68712	0.838154	0.999844
ENSFDAG00000005141	ENSFDAG00000005141	0.351835	-0.0107355	-0.0267092	-0.0572527	-0.13348	-0.391803	-0.0516006	0.382013	0.0885174	0.00423733	0.0989193	0.126564	0.085612	0.111252	0.56919	0.971216	0.681576	0.855555	0.707514	0.18055	0.877055	0.840797	0.999844
ENSFDAG00000005146	ENSFDAG00000005146	0.00585776	-0.947172	0.0474956	-0.0920642	-0.0415526	-0.0712295	0.273233	0.168185	0.0389706	0.00186553	0.0435502	0.055721	0.0376915	0.0489799	0.988604	1.6e-06	0.271487	0.659097	0.86027	0.713699	0.216981	0.816736	0.999844
ENSFDAG00000005152	ST3GAL3	0.543214	-0.150965	-0.063581	0.217458	0.168938	0.00900806	0.00628836	0.2248	0.052089	0.00249351	0.0582101	0.074478	0.0503793	0.0654677	0.251917	0.508317	0.20292	0.367421	0.535896	0.967987	0.980393	0.744986	0.999844
ENSFDAG00000005154	PLIN2	-0.340839	-0.283204	0.056087	-0.291451	-0.0727408	-0.0460485	0.328794	0.112178	0.0259931	0.00124429	0.0290476	0.0371654	0.0251399	0.0326692	0.308847	0.0789878	0.111831	0.0872554	0.705937	0.771491	0.0688977	0.573787	0.999844
ENSFDAG00000005157	STAU2	-0.184503	0.0132922	0.022589	-0.0611634	-0.080156	-0.0975327	0.148366	0.0508889	0.0117916	0.000564466	0.0131773	0.0168599	0.0114046	0.0148202	0.413423	0.902575	0.341719	0.59416	0.537025	0.361088	0.222948	0.805944	0.999844
ENSFDAG00000005159	ENSFDAG00000005159	0.526252	0.029049	-0.062309	0.128172	-0.169961	-0.118894	0.0841786	0.147438	0.0341634	0.0016354	0.038178	0.0488475	0.033042	0.0429379	0.170522	0.875116	0.123372	0.511842	0.441891	0.513063	0.684567	0.788268	0.999844
ENSFDAG00000005163	ENSFDAG00000005163	0.543924	-0.136779	-0.0654229	0.231269	0.195128	0.0854557	-0.00350714	0.0549968	0.00944901	0.000637394	0.0127169	0.0159652	0.0092362	0.0120914	0.0203751	0.159397	0.00956005	0.0402851	0.122516	0.373901	0.974556	0.477517	0.999844
ENSFDAG00000005164	FBXO3	0.0676064	0.0664329	-0.0122137	0.103113	-0.0713616	-0.0167652	-0.00178594	0.022495	0.00521238	0.000249517	0.0058249	0.00745276	0.00504129	0.00655113	0.652163	0.357487	0.439398	0.176681	0.408453	0.813337	0.982396	0.667121	0.999844
ENSFDAG00000005165	NRROS	0.914167	-1.14142	-0.0966139	1.04103	0.773236	0.341943	0.408049	0.939681	0.194462	0.010606	0.232703	0.296307	0.188836	0.246254	0.345654	0.00964256	0.348177	0.0309242	0.155463	0.431349	0.410916	0.444832	0.999844
ENSFDAG00000005171	EIF4G1	0.439712	-0.401712	-0.0407604	0.0753158	0.0858802	0.151582	0.246692	0.254323	0.0589299	0.00282098	0.0658549	0.0842591	0.0569956	0.0740655	0.383253	0.0979637	0.442825	0.769148	0.767338	0.525473	0.364695	0.832395	0.999844
ENSFDAG00000005172	SPPL2A	-0.252464	0.0238269	0.0188401	0.333042	0.128489	0.112394	-0.117428	0.211025	0.0488973	0.00234072	0.0546433	0.0699144	0.0472923	0.0614562	0.582606	0.914192	0.696972	0.154237	0.62701	0.605274	0.635725	0.648382	0.999844
ENSFDAG00000005175	TMC8	1.36973	-0.560914	-0.140652	0.153662	-0.316201	0.396863	0.0852394	0.391388	0.0906897	0.00434132	0.101347	0.12967	0.087713	0.113983	0.0285658	0.0625197	0.0327859	0.62932	0.379891	0.180241	0.800673	0.809444	0.999844
ENSFDAG00000005178	WDR74	0.311568	-0.114577	-0.0326105	-0.0664869	0.055974	0.0567738	0.0860203	0.0644879	0.0149427	0.000715307	0.0166986	0.0213654	0.0144522	0.0187806	0.219855	0.348598	0.22273	0.606894	0.701764	0.636742	0.530206	0.806512	0.999844
ENSFDAG00000005180	CSE1L	0.0335592	-0.0724628	0.000467036	-0.170437	-0.0678356	0.00775261	0.200739	0.0923633	0.0214018	0.0010245	0.0239168	0.0306007	0.0206993	0.0268987	0.912073	0.620371	0.988358	0.270429	0.698175	0.957027	0.220969	0.724137	0.999844
ENSFDAG00000005184	ENSFDAG00000005184	0.638445	0.296519	-0.101813	1.16709	-0.158524	0.128325	-0.735447	0.765586	0.177396	0.00849198	0.198243	0.253645	0.171574	0.222959	0.465592	0.481425	0.26923	0.00876149	0.752943	0.756711	0.119343	0.30907	0.999844
ENSFDAG00000005186	ENSFDAG00000005186	-0.0332421	-0.00695646	0.00540344	0.148223	-0.0485354	-0.0153002	-0.130969	0.0500224	0.0115908	0.000554854	0.0129529	0.0165728	0.0112104	0.0145679	0.881846	0.948481	0.818563	0.192793	0.706161	0.885101	0.277876	0.678089	0.999844
ENSFDAG00000005188	PLK4	0.462406	-0.0561995	-0.0549698	-0.127999	0.081016	-0.0170357	0.273529	0.21272	0.04929	0.00235951	0.0550822	0.0704758	0.0476721	0.0619497	0.316063	0.800164	0.257781	0.585492	0.760232	0.937809	0.271783	0.804309	0.999844
ENSFDAG00000005195	RF00003	0.344334	0.160252	-0.0485376	0.0783409	-0.485118	-0.131866	0.39547	0.445083	0.103131	0.00493691	0.115251	0.14746	0.0997464	0.12962	0.605764	0.617773	0.489693	0.817499	0.206477	0.676294	0.272012	0.838154	0.999844
ENSFDAG00000005196	MDH2	0.159481	0.0179315	-0.0172659	-0.0680351	0.0115037	-0.0256445	-0.017286	0.0289066	0.00669803	0.000320635	0.00748513	0.00957698	0.00647818	0.00841836	0.348234	0.826571	0.334926	0.431644	0.906424	0.750017	0.850563	0.766288	0.999844
ENSFDAG00000005197	PID1	-0.489271	-0.498237	0.0854979	0.116117	-0.0381383	-0.346198	0.14338	0.374244	0.0867172	0.00415116	0.0969075	0.12399	0.0838708	0.10899	0.423836	0.0906584	0.184509	0.709144	0.91375	0.231924	0.664067	0.825346	0.999844
ENSFDAG00000005198	SEPHS2	0.052123	-0.29754	0.0147788	-0.0444076	0.200231	-0.294694	0.017509	0.0982676	0.0227699	0.00109	0.0254456	0.0325569	0.0220225	0.0286181	0.867941	0.0486311	0.654414	0.780715	0.267124	0.0470545	0.917566	0.833353	0.999844
ENSFDAG00000005210	PCMTD2	-0.224699	0.0880098	0.0214678	0.113231	-0.0332789	-0.0928192	0.0235263	0.0223694	0.00518327	0.000248124	0.00579237	0.00741115	0.00501314	0.00651455	0.133005	0.22154	0.172925	0.136809	0.699076	0.189878	0.770683	0.634955	0.999844
ENSFDAG00000005213	LTBP1	-0.0431259	-0.448809	0.0335502	-0.283617	-0.0191563	-0.0592244	0.149101	0.200278	0.0464071	0.00222151	0.0518605	0.0663539	0.0448839	0.0583264	0.92323	0.0372161	0.476576	0.212979	0.940719	0.779825	0.536989	0.690272	0.999844
ENSFDAG00000005214	RF00592	-1.00286	-0.0362002	0.0929403	0.504773	-0.767437	0.60519	0.555809	0.909811	0.210815	0.0100917	0.235589	0.301428	0.203895	0.264961	0.293078	0.937158	0.354878	0.298356	0.162167	0.180162	0.280241	0.732806	0.999844
ENSFDAG00000005216	RF00001	0.101519	0.143638	-0.0229447	-0.72532	-0.10475	0.289648	0.640336	0.764536	0.177153	0.00848032	0.197971	0.253297	0.171338	0.222653	0.90757	0.732902	0.803238	0.103068	0.835126	0.484083	0.174767	0.594428	0.999844
ENSFDAG00000005217	PSEN1	-0.256512	-0.212686	0.0451496	-0.0172395	-0.00894725	-0.154832	0.0143314	0.0319556	0.00740453	0.000354455	0.00827465	0.0105871	0.00716149	0.00930632	0.151304	0.0134486	0.0164788	0.849687	0.930706	0.0673072	0.881902	0.83946	0.999844
ENSFDAG00000005220	ENSFDAG00000005220	0.259573	-0.0971052	-0.0443414	0.600652	0.021892	0.085398	0.181938	0.688629	0.159564	0.00763835	0.178315	0.228148	0.154327	0.200547	0.754432	0.807932	0.611907	0.154903	0.963444	0.827909	0.684544	0.648382	0.999844
ENSFDAG00000005227	XYLB	0.624571	-0.132057	-0.0766763	0.230483	0.0792651	0.229929	-0.0201484	0.229502	0.0531785	0.00254566	0.0594277	0.0760357	0.051433	0.066837	0.192324	0.566877	0.128584	0.344422	0.773762	0.310656	0.93788	0.742729	0.999844
ENSFDAG00000005229	AMMECR1L	0.0538798	-0.0915661	-0.000228816	0.0524402	-0.0512476	-0.103847	0.0375888	0.0426885	0.00989147	0.000473506	0.0110538	0.014143	0.00956681	0.012432	0.794264	0.357222	0.99161	0.617936	0.666523	0.28836	0.736024	0.808274	0.999844
ENSFDAG00000005230	CD81	-0.243346	0.104769	0.0229416	0.101924	0.0494794	-0.0628166	-0.0708977	0.0664604	0.0153997	0.000737187	0.0172094	0.0220189	0.0148943	0.019355	0.345203	0.398524	0.398135	0.437189	0.738797	0.606754	0.610327	0.768006	0.999844
ENSFDAG00000005236	MCM8	0.319962	0.081671	-0.0335278	-0.0572052	-0.162495	-0.11231	-0.10298	0.0619317	0.0143504	0.000686954	0.0160367	0.0205185	0.0138794	0.0180362	0.198545	0.495386	0.200824	0.651465	0.256625	0.340435	0.443203	0.815667	0.999844
ENSFDAG00000005237	ENSFDAG00000005237	-0.351427	-0.458803	0.0294506	0.105059	0.491844	0.579657	0.574875	0.630459	0.146085	0.00699312	0.163252	0.208876	0.14129	0.183606	0.658059	0.229987	0.724707	0.794849	0.281848	0.123048	0.179719	0.836864	0.999844
ENSFDAG00000005241	MYCBPAP	0.587599	-0.627032	-0.0505471	0.099453	0.0590032	0.161295	0.34655	0.47303	0.109607	0.0052469	0.122487	0.156719	0.10601	0.137759	0.39291	0.0582306	0.485288	0.776283	0.881519	0.620323	0.350461	0.833353	0.999844
ENSFDAG00000005242	SASH1	0.0950758	0.39817	-0.0288516	-0.314895	-0.00390668	0.0743931	0.0474134	0.375933	0.0871086	0.00416989	0.0973449	0.12455	0.0842494	0.109482	0.87677	0.177311	0.655024	0.312843	0.991168	0.797719	0.886057	0.737181	0.999844
ENSFDAG00000005244	ENSFDAG00000005244	-0.172646	-0.0429778	0.0148068	0.322424	0.148812	0.119189	-0.20994	0.17614	0.040814	0.00195377	0.0456102	0.0583567	0.0394744	0.0512967	0.680805	0.831533	0.737637	0.131115	0.537885	0.548573	0.353959	0.628369	0.999844
ENSFDAG00000005249	ALDH2	0.54521	-0.174126	-0.058105	0.0862844	-0.0966654	0.168611	-0.0553016	0.14273	0.0330723	0.00158318	0.0369587	0.0472875	0.0319868	0.0415667	0.148983	0.338322	0.144201	0.65356	0.656662	0.345805	0.786201	0.816437	0.999844
ENSFDAG00000005255	ENSFDAG00000005255	0.303053	0.107331	-0.0409428	-0.0704015	-0.0197704	0.0753916	-0.00415779	0.0527856	0.0122311	0.000585505	0.0136684	0.0174883	0.0118297	0.0153726	0.187153	0.331801	0.0906367	0.547058	0.881159	0.488206	0.973248	0.794835	0.999844
ENSFDAG00000005256	SELENOF	-0.254434	0.222777	0.0214233	-0.117274	0.0165376	0.0545192	-0.114555	0.034747	0.00805134	0.000385418	0.00899747	0.011512	0.00778707	0.0101193	0.172269	0.0130367	0.275167	0.216328	0.877504	0.536694	0.254794	0.695043	0.999844
ENSFDAG00000005257	ENSFDAG00000005257	-0.0559168	0.0145479	0.00689228	0.0342293	-0.0101777	-0.0674149	-0.0253046	0.0574626	0.0133148	0.000637382	0.0148795	0.0190378	0.0128778	0.0167346	0.815556	0.899672	0.784853	0.779009	0.941199	0.552467	0.844915	0.833353	0.999844
ENSFDAG00000005260	TTC13	0.0970696	-0.0842126	-0.0108294	0.0989201	0.0717968	-0.0261781	0.0468877	0.0323169	0.00748824	0.000358462	0.0083682	0.0107068	0.00724245	0.00941153	0.589219	0.330471	0.567332	0.279539	0.487768	0.758382	0.628873	0.727325	0.999844
ENSFDAG00000005263	AADAC	0.705668	-0.767439	-0.0502636	-0.172166	0.488337	0.12287	0.0922845	0.342089	0.0792664	0.00379449	0.0885812	0.113337	0.0766646	0.0996253	0.227621	0.0064139	0.414514	0.56295	0.146904	0.657215	0.769998	0.798632	0.999844
ENSFDAG00000005265	KDSR	-0.290092	0.0808092	0.0332948	0.0491422	0.0305957	-0.255873	0.0163185	0.0981188	0.0227354	0.00108834	0.0254071	0.0325075	0.0219892	0.0285748	0.354393	0.592006	0.312861	0.757852	0.86525	0.0844332	0.923095	0.831418	0.999844
ENSFDAG00000005268	UBE2K	-0.127585	0.0521605	0.0158903	-0.141439	0.0408198	-0.0374912	-0.010386	0.0284577	0.00659403	0.000315657	0.00736891	0.00942828	0.00637759	0.00828765	0.449462	0.520651	0.371116	0.0994217	0.674199	0.638739	0.90917	0.587912	0.999844
ENSFDAG00000005270	RF00001	0.521568	-0.684184	-0.0161866	-0.549378	0.0707096	-0.2879	0.450244	0.787111	0.182384	0.00873073	0.203816	0.260776	0.176398	0.229228	0.556609	0.109141	0.862469	0.223646	0.889872	0.493041	0.347011	0.702216	0.999844
ENSFDAG00000005271	MTHFD2L	0.0412246	0.110884	-0.010514	-0.074	-0.303891	0.237963	0.0361959	0.0691107	0.0160139	0.000766585	0.0178957	0.0228969	0.0154882	0.0201269	0.875392	0.380903	0.704138	0.580148	0.0446112	0.0558646	0.798618	0.804309	0.999844
ENSFDAG00000005277	ASB7	-0.406824	0.110058	0.0457567	0.0766517	-0.0644214	-0.198391	-0.00517565	0.0786836	0.018232	0.000872768	0.0203745	0.0260685	0.0176336	0.0229148	0.146969	0.415024	0.121421	0.591264	0.689894	0.135175	0.972725	0.80564	0.999844
ENSFDAG00000005281	ATP5F1E	-0.0851741	0.234386	0.00346563	-0.104664	-0.0244149	0.0483902	-0.196279	0.0661523	0.0153283	0.000733769	0.0171296	0.0219168	0.0148252	0.0192653	0.740525	0.0583382	0.898197	0.42389	0.869009	0.691053	0.157327	0.765586	0.999844
ENSFDAG00000005284	N4BP1	-0.102447	0.0085395	0.00859351	0.290204	0.0138238	-0.0832287	-0.074001	0.0246632	0.00571479	0.000273567	0.00638635	0.00817112	0.00552721	0.00718258	0.514183	0.910061	0.603368	0.000281866	0.878455	0.262931	0.382572	0.0949827	0.999844
ENSFDAG00000005285	ENSFDAG00000005285	0.426391	0.215133	-0.0792484	0.872472	0.0213907	0.466388	-0.618399	0.535155	0.124002	0.00593601	0.138574	0.177301	0.119932	0.155852	0.559984	0.541246	0.303671	0.0190913	0.959484	0.178069	0.117246	0.385481	0.999844
ENSFDAG00000005286	ENSFDAG00000005286	-0.11398	0.261262	0.00563595	-0.0948331	0.0226425	-0.157551	-0.0121645	0.0374519	0.00867808	0.00041542	0.00969787	0.0124081	0.00839324	0.010907	0.555884	0.00503859	0.782151	0.335552	0.838925	0.0854838	0.907274	0.742729	0.999844
[truncated: 9,223 more rows]
