# Supplementary material for: Morphological and genomic shifts in mole-rat ‘queens’ increase fecundity but reduce skeletal integrity
Source: eLife. 2021 Apr 12;10:e65760. doi: 10.7554/eLife.65760 (PMC8104968; doi:10.7554/eLife.65760)
Supplement: Supplementary file 5. [file elife-65760-supp5.xlsx]

## Sheet: Table S5
Supplementary File 5. Proportions of cell types estimated with CIBERSORT, based on reference gene expression levels for 412 marker genes in 27 purified mouse cell types (Hume et al, Genomics, 2010).
Input Sample	Baf3	B-cells_marginal_zone	C2C12	common_myeloid_progenitor	dendritic_cells_lymphoid_CD8a+	dendritic_cells_myeloid_CD8a-	dendritic_plasmacytoid_B220+	follicular_B-cells	granulo_mono_progenitor	granulocytes_mac1+gr1+	macrophage_bone_marrow	mast_cells	mast_cells_IgE	mega_erythrocyte_progenitor	NK_cells	osteoblast_day14	osteoblast_day21	osteoblast_day5	osteoclasts	RAW_264_7	T-cells_CD4+	T-cells_CD8+	T-cells_foxP3+	thymocyte_DP_CD4+CD8+	thymocyte_SP_CD4+	thymocyte_SP_CD8+	macrophage_peri_LPS_thio_0hrs
G1F022_lb_E2	0	0.0008	0.0596006	0.186898	0	0.0334705	0	0	0	0.0302397	0.00861561	0	0	0	0	0	0.0518832	0.363297	0	0	0	0.102393	0.0377541	0.0441987	0	0	0.0808447
G1F022_lb_null	0.00199073	0.00966495	0.0702726	0.149663	0	0.0342267	0	0	0	0.0136189	0.00571767	0	0.0131966	0	0	0	0.136406	0.230451	0	0	0	0.185518	0.0656348	0.0160016	0	0	0.0676365
G1F025_lb_null	0	0.0001	0.0635885	0.234969	0	0.0430262	0	0	0	0.0235169	0	0	0	0	0	0	0.0684425	0.218272	0	0	0	0.212005	0.0003	0.0469202	0	0	0.088897
G1F025_v_null	0	0.0205666	0.118413	0.0752418	0.00188081	0	0.00983489	0	0	0.0181966	0	0.00777994	0	0	0	0	0.0924568	0.272308	0	0	0.134918	0.0521309	0.0383138	0	0	0.0945646	0.0633938
G4F019_lb_null	0	0.0368325	0.0551151	0.136965	0	0.0448448	0	0	0	0	0.0238395	0.0140149	0	0	0	0	0	0.383836	0	0	0.073251	0.076711	0	0.0231727	0	0.0625025	0.068915
G4F019_v_E2	0	0.0434205	0.0635481	0.0810336	0	0.0358897	0.0008	0	0	0.00934187	0.0367009	0.00805134	0	0	0	0	0.0685742	0.411157	0	0	0.0291742	0.113572	0	0	0	0.0206364	0.0780782
G4F019_v_null	0.00189347	0.0511849	0.0591156	0.0762168	0	0.0460508	0	0	0	0.00721895	0.0300163	0	0	0	0	0	0.0512519	0.413137	0	0	0.0784853	0.0954523	0	0.0166904	0	0	0.0732859
G4F020_lb_E2	0.0225766	0.025594	0.00812687	0.00880127	0.0363214	0	0	0	0.0166093	0	0.00932629	0.00858864	0	0	0	0.0155903	0	0.467856	0	0	0.19235	0.0902571	0	0	0	0.0316282	0.0663746
G4F020_lb_null	0	0.00168693	0.00471308	0.173575	0	0.0108159	0.0131905	0.00172013	0	0.00750129	0.017914	0	0.00808216	0	0	0.0874475	0	0.456038	0	0	0.0590595	0.0786967	0	0	0	0	0.0795598
G4F020_v_null	0.00828282	0.0769348	0.0292664	0.023508	0.018495	0	0	0	0	0	0	0	0	0	0	0	0.0814147	0.357355	0	0	0.20182	0	0	0	0	0.133258	0.0696654
MAF003_lb_null	0	0.0271176	0.0632858	0.156323	0	0	0	0	0	0.052865	0.00137421	0	0	0	0	0.159041	0	0.280946	0	0	0.00766173	0.0914103	0.0302666	0.0376374	0	0.0511004	0.0409708
MAF003_v_null	0.0248545	0.0172743	0.0970683	0	0.0816297	0	0	0	0.0544448	0.00724837	0	0	0.00748188	0	0	0	0.0717595	0.273747	0	0	0	0.188505	0.0928548	0.0310998	0	0	0.0520322
MAF006_lb_E2	0	0.00182318	0.0198874	0.114529	0	0.0312353	0	0.0362797	0	0.0717851	0.0138414	0.00562422	0	0	0	0	0.0580219	0.0945884	0.00735408	0.0126967	0	0.265357	0.0425839	0.0189197	0.172241	0	0.0332324
MAF006_lb_null	0.00742251	0.00335481	0.0482565	0.0892538	0	0.0538916	0	0.026798	0	0.0423052	0.0108925	0	0.025489	0	0	0	0.12571	0.122619	0	0	0	0.172231	0.00698522	0.0004	0.197002	0	0.0673477
MAF006_v_E2	0.0332412	0.05001	0.0493873	0	0	0	0.0170054	0	0.0576615	0.0427702	0.012049	0	0	0	0.0111813	0	0.141775	0.177834	0	0	0	0.288647	0.0372664	0.02049	0	0	0.0606824
NOF007_lb_E2	0.00462025	0.0299093	0.0764018	0.161532	0.0005	0.00408837	0.00649274	0	0	0.0315023	0.025531	0.00295027	0	0	0	0	0.0870536	0.319733	0	0	0.00231133	0.146783	0	0.00695945	0	0	0.0936109
NOF007_lb_null	0.00345044	0.0132725	0.0354664	0.10959	0	0.00949394	0.0047661	0.00672167	0	0.0293704	0.00863253	0	0	0	0	0	0.0829176	0.38358	0	0	0.0662972	0.0668804	0	0	0	0.0725503	0.107011
NOF007_v_E2	0.0128263	0.104828	0.0658	0	0.00172718	0	0	0	0.0532703	0	0	0.00785024	0	0	0	0	0.20073	0.270284	0	0.00729866	0	0.176983	0	0.0465967	0	0	0.051806
NOF007_v_null	0.00654963	0	0.10028	0.0407948	0.0108703	0	0.016041	0.00252684	0	0.00402484	0.0346323	0.00677866	0	0	0	0	0.207375	0.260904	0	0	0.0641644	0.0692447	0.0178696	0	0	0.095592	0.0623524
NOF009_lb_E2	0.00322273	0.0400105	0.0439118	0.057489	0	0.0234745	0	0	0.0344058	0.035038	0.0232218	0.00375194	0	0	0	0	0.126532	0.179417	0.00650367	0	0	0.285212	0.0119834	0.039552	0	0	0.086273
NOF009_lb_null	0.0226087	0.0231608	0.0405607	0.108549	0	0.0386076	0	0	0	0.0429816	0.00160427	0	0	0	0	0	0.174707	0.158877	0.0227436	0	0	0.241116	0	0.0160543	0.0179612	0	0.0904676
WEF001_lb_null	0	0.0297263	0.110182	0.0356833	0.0206174	0	0	0	0	0.0042995	0.0696843	0.00233725	0	0	0	0.00674699	0.0194288	0.282819	0	0	0	0.0921093	0.114237	0	0	0.154672	0.0574565
WEF001_v_E2	0	0.0245204	0.106088	0.145469	0.0109181	0	0.0091605	0	0	0.0267438	0.018716	0	0.00247206	0	0	0	0.0329343	0.264329	0	0	0.0469142	0.0509381	0.0775572	0	0	0.117879	0.0653602
WEF001_v_null	0	0.0393177	0.165445	0.0479865	0.0679216	0	0.00320994	0	0	0.0113652	0.0788328	0	0.0201668	0	0	0	0.0396729	0.250704	0	0	0	0.0539398	0.120798	0	0	0.0580878	0.0425527
WEF002_lb_E2	0.0157622	0	0.0535427	0.084367	0.013107	0.0112021	0.00553523	0	0	0	0.0307014	0	0.0113513	0	0	0.142924	0	0.261887	0	0	0	0.16347	0.134178	0.00634169	0	0.0163686	0.0492616
WEF002_lb_null	0.0228915	0.0158569	0.0725754	0	0.0134579	0	0.00952134	0	0.0393515	0.0334191	0	0.0288698	0	0	0	0.00188226	0.0162132	0.337628	0	0.0231255	0.114956	0.0652086	0	0.0329716	0	0.106924	0.0651483
WEF002_v_null	0.0447765	0.0159592	0.0619364	0.135334	0.00162292	0	0.00416541	0.024698	0	0	0.00181	0	0.00217433	0	0	0.0772724	0	0.278896	0	0	0.113031	0.122023	0	0.0966001	0	0	0.0197011
DVF007_lb_null	0.0444957	0	0.0462314	0.0363557	0.00162348	0	0	0.0253932	0	0	0	0	0	0	0	0	0.0504371	0.424293	0	0	0.23384	0.04156	0	0.0418017	0	0.0136509	0.0403172
DVF007_v_E2	0.0304749	0	0.133865	0.0102173	0.0274683	0	0	0.0017756	0.0378037	0	0	0.0148923	0	0	0.00987246	0	0	0.426307	0	0	0.189383	0.0171503	0.0279977	0.0141979	0	0.00662699	0.0519668
DVF007_v_null	0.0181816	0	0.108165	0.03225	0.0185753	0	0	0	0.0108261	0	0.00876626	0.0110875	0	0	0	0.0305221	0	0.397009	0	0	0.169538	0.00381378	0.0394794	0	0	0.113465	0.0383219
DVF008_lb_E2	0.0403705	0	0.0838954	0.118681	0.0160936	0	0	0.0114449	0	0	0.0002	0.00492322	0	0	0	0	0	0.385799	0	0	0.190148	0.0715428	0	0.0207965	0	0.0225675	0.033588
DVF008_lb_null	0.0354596	0	0.0409027	0.0343315	0.0224906	0	0	0.0178405	0	0	0	0	0.0137928	0	0	0	0	0.455197	0	0	0.177989	0	0	0.0002	0	0.142214	0.0595829
DVF008_v_E2	0.0241403	0	0.0635527	0.0238466	0.0207259	0	0	0	0.0220321	0	0	0	0.0036258	0	0	0	0.0140722	0.487979	0	0.00530643	0.201955	0	0	0.00128114	0	0.0882108	0.0432725
DVF008_v_null	0.0615941	0	0.14075	0.00541793	0.0264722	0	0	0	0.0112664	0	0	0.00103126	0	0	0.0007	0	0.050592	0.34405	0	0	0.192253	0.0104948	0.0255762	0	0	0.0642876	0.0655128
LAF007_lb_E2	0.00471683	0.0503928	0.0181526	0.0270496	0.00749151	0	0.0114023	0	0.0122286	0	0	0	0	0	0	0	0.0670138	0.418503	0	0	0.136765	0.0781361	0	0.0215062	0	0.045378	0.101263
LAF007_lb_null	0.044228	0.0395443	0.0700646	0	0	0.00496765	0	0	0.0199261	0	0	0	0	0	0	0	0.077278	0.346537	0	0	0.0615695	0.0683593	0.0194938	0	0	0.169035	0.0789976
LAF007_vert_null	0.0350499	0.0298751	0.106347	0	0.024545	0	0	0	0.0287401	0	0.00975032	0	0.00268815	0	0	0	0.0628674	0.304696	0	0	0.11416	0.0702178	0.0150288	0.0287946	0	0.090778	0.076462
LAF008_lb_null	0.0347522	0	0.0747774	0.0509561	0	0.0028675	0	0.0146677	0	0	0	0	0	0	0	0.0156127	0	0.397282	0	0	0.140542	0.0391577	0	0.0451499	0	0.10314	0.081094
LAF008_vert_null	0.0373184	0	0.117303	0.010175	0.0208192	0	0	0	0.00780848	0	0.00857304	0.00167579	0	0	0.0048759	0	0.0200737	0.42659	0	0.00151455	0.0907378	0.0420302	0.0513635	0.00643432	0	0.0825581	0.070149
WAF011_lb_E2	0.0179309	0	0.0453505	0.001	0.0152572	0	0.0101024	0	0.00344303	0	0.00353098	0	0.0138514	0	0	0	0	0.442469	0	0	0.167022	0	0	0	0	0.211413	0.0686376
WAF011_lb_null	0.0414861	0.0506795	0.0824157	0.0675708	0	0.0319352	0	0	0	0.00832872	0	0	0	0	0.00568922	0	0.0634826	0.302605	0	0.037172	0.0551285	0.092517	0	0.0813415	0	0.0369257	0.0427226
WAF011_v_E2	0.0416117	0	0.141579	0	0.0143081	0	0	0	0.045636	0	0.00227343	0	0	0	0.00400947	0	0.0487131	0.321257	0	0	0.178477	0	0.0272997	0	0	0.102421	0.0724148
WAF011_v_null	0.013251	0	0.0907546	0.0482744	0.0118913	0	0	0	0	0	0	0	0	0	0	0	0.0810382	0.369079	0	0	0.196026	0	0	0	0	0.122044	0.0676414
WAF014_lb_E2	0.0129284	0.0189333	0.0508079	0.0625181	0	0	0	0	0	0	0.0198414	0	0	0	0	0	0.055553	0.401242	0.0244296	0	0.112276	0.027851	0	0	0	0.117104	0.0965152
WAF014_lb_null	0.026051	0.0549891	0.0239291	0	0	0.0553068	0	0	0.0831907	0	0	0	0	0.0321838	0	0	0.138822	0.261189	0	0.00504947	0.0374025	0.130776	0	0.0791375	0	0	0.0719729
WAF014_v_E2	0.0448582	0.0509293	0.0690923	0	0	0.0189566	0.00863932	0	0.0722709	0	0	0	0	0	0	0	0.154631	0.183268	0	0.00174582	0.0780106	0.150439	0	0.0863524	0	0	0.0808067
WAF014_v_null	0.0429038	0.071061	0.0435442	0	0	0.0170412	0.0118961	0	0.0823092	0	0	0	0	0.0196176	0	0	0.193547	0.198499	0	0.0128615	0.10574	0.0805155	0	0.0561802	0	0.0009	0.0633563
