# Supplementary material for: Morphological and genomic shifts in mole-rat ‘queens’ increase fecundity but reduce skeletal integrity
Source: eLife. 2021 Apr 12;10:e65760. doi: 10.7554/eLife.65760 (PMC8104968; doi:10.7554/eLife.65760)
Supplement: Supplementary file 6. [file elife-65760-supp6.xlsx]

## Sheet: Table S6
Supplementary File 6. 95% confidence intervals of mediation analysis testing for cell type proportions as mediating the effect of queen status on gene expression (in long bones or in lumbar vertebrae).
Gene	Queen in long bones 2.5%	Queen in long bones 97.5%	Queen in lumbar vertebrae 2.5%	Queen in lumbar vertebrae 97.5%
ENSFDAG00000000040	-1.06109	1.01785	-1.50275	0.243071
ENSFDAG00000000174	-0.71422	1.11517	-1.18247	0.314558
ENSFDAG00000000414	-1.2139	0.993632	-0.377237	1.1401
ENSFDAG00000000511	-1.06959	0.759307	-1.07496	0.472617
ENSFDAG00000000574	-0.767172	0.420141	-0.435758	0.666458
ENSFDAG00000000633	-0.722958	0.9292	-0.753309	0.664547
ENSFDAG00000000662	-0.991368	1.2752	-1.43019	0.303379
ENSFDAG00000000809	-0.540867	0.769683	-0.546192	0.954006
ENSFDAG00000000911	-0.446349	0.786343	-0.434278	0.722155
ENSFDAG00000000917	-0.329665	0.712343	-0.459397	0.668824
ENSFDAG00000001112	-0.445443	0.590635	-0.411137	0.708926
ENSFDAG00000001168	-0.616181	0.926046	-0.560209	0.903078
ENSFDAG00000001407	-0.616788	0.654015	-0.47238	0.756412
ENSFDAG00000001453	-0.345975	0.899577	-0.64644	0.479431
ENSFDAG00000001475	-0.827264	0.518714	-0.44763	0.755227
ENSFDAG00000001619	-0.723391	0.886435	-1.02558	0.374635
ENSFDAG00000001664	-1.6289	0.901602	-0.442057	1.19166
ENSFDAG00000001667	-0.761518	0.650203	-0.64317	0.47432
ENSFDAG00000001689	-1.02453	0.607258	-0.374012	0.704085
ENSFDAG00000001690	-0.85429	0.890023	-1.13873	0.521966
ENSFDAG00000001710	-2.6353	1.5026	-1.57276	0.438665
ENSFDAG00000001714	-1.57686	0.883622	-1.51834	0.307105
ENSFDAG00000001773	-1.06074	1.09674	-1.63032	0.23058
ENSFDAG00000001861	-0.665851	0.873808	-0.861674	0.571925
ENSFDAG00000002238	-1.08879	1.0871	-1.20272	0.448122
ENSFDAG00000002254	-0.590629	1.03325	-0.953596	0.420628
ENSFDAG00000002422	-0.52967	0.796349	-1.00499	0.391485
ENSFDAG00000002757	-0.991843	0.268409	-0.404776	0.638451
ENSFDAG00000002801	-0.904095	0.513031	-0.384339	0.997481
ENSFDAG00000002885	-0.356435	0.953956	-0.752341	0.568647
ENSFDAG00000003034	-0.889314	1.02833	-1.3674	0.406159
ENSFDAG00000003096	-1.01153	0.790099	-1.05741	0.745201
ENSFDAG00000003097	-0.884212	1.26934	-1.41728	0.35364
ENSFDAG00000003106	-0.745311	0.693268	-0.720655	0.560922
ENSFDAG00000003159	-1.11736	0.459943	-0.607193	0.810469
ENSFDAG00000003380	-0.571411	0.83822	-0.788146	0.647436
ENSFDAG00000003557	-0.517613	1.05247	-0.944128	0.536671
ENSFDAG00000003605	-0.903829	1.40143	-1.50873	0.477792
ENSFDAG00000003642	-0.430445	0.723286	-0.72313	0.723793
ENSFDAG00000003645	-1.31669	0.474599	-0.485265	0.99413
ENSFDAG00000004198	-0.748996	1.44329	-1.10069	0.369295
ENSFDAG00000004251	-1.072	1.30006	-1.20536	0.782755
ENSFDAG00000004439	-1.14781	1.3463	-1.7878	0.277367
ENSFDAG00000004462	-0.270412	0.668572	-0.402825	0.564779
ENSFDAG00000004594	-0.447643	0.890373	-0.773569	0.436718
ENSFDAG00000005016	-0.596262	0.781603	-0.740276	0.73374
ENSFDAG00000005284	-0.369697	0.825112	-0.602462	0.380118
ENSFDAG00000005384	-1.27564	0.714799	-0.367879	1.07543
ENSFDAG00000005533	-0.45142	0.800772	-0.716474	0.407342
ENSFDAG00000005587	-0.645052	0.802136	-0.608618	0.565206
ENSFDAG00000005600	-0.542283	0.637357	-0.345437	0.91852
ENSFDAG00000005603	-0.482483	1.06101	-0.891691	0.361314
ENSFDAG00000005646	-0.333661	0.684875	-0.498424	0.77083
ENSFDAG00000005799	-0.412053	0.844587	-0.767	0.587402
ENSFDAG00000005826	-0.926715	0.462884	-0.764148	0.802334
ENSFDAG00000005972	-0.671817	0.441208	-0.600742	0.615075
ENSFDAG00000005996	-0.437802	0.949924	-0.735466	0.601043
ENSFDAG00000006023	-0.589337	1.08271	-1.09377	0.4052
ENSFDAG00000006126	-1.06162	0.35437	-0.383399	0.707681
ENSFDAG00000006145	-0.909739	1.39099	-1.42943	0.466385
ENSFDAG00000006243	-0.555617	0.85905	-0.702187	0.751842
ENSFDAG00000006277	-0.389496	0.907515	-0.709719	0.513053
ENSFDAG00000006280	-0.530548	0.926929	-0.850036	0.73212
ENSFDAG00000006304	-1.39782	0.226823	-0.270174	1.07884
ENSFDAG00000006430	-0.925844	1.2245	-1.56959	0.352039
ENSFDAG00000006589	-0.927481	1.02012	-1.24312	0.257368
ENSFDAG00000006620	-1.18228	0.60038	-0.302925	0.931449
ENSFDAG00000006648	-0.421944	0.686267	-0.392562	0.722808
ENSFDAG00000006702	-1.06243	0.492774	-0.436805	0.739857
ENSFDAG00000007079	-0.530408	1.10834	-0.998718	0.34545
ENSFDAG00000007107	-0.765702	0.963761	-1.12264	0.342366
ENSFDAG00000007236	-0.627101	1.11782	-0.927378	0.407765
ENSFDAG00000007335	-0.453699	0.692713	-0.504173	0.569736
ENSFDAG00000007437	-1.2398	0.667007	-0.428638	1.01642
ENSFDAG00000007481	-0.825681	0.802695	-1.0949	0.693045
ENSFDAG00000007533	-0.377284	1.08963	-0.834075	0.429849
ENSFDAG00000007563	-0.514292	0.942679	-0.861324	0.382433
ENSFDAG00000007619	-0.399384	0.46935	-0.623993	0.388828
ENSFDAG00000007636	-0.957853	0.854303	-1.12187	0.469025
ENSFDAG00000007842	-1.20425	0.593707	-0.311563	0.988597
ENSFDAG00000007849	-0.658362	0.95178	-0.945993	0.338598
ENSFDAG00000007865	-0.43704	0.730971	-0.49576	0.717989
ENSFDAG00000007872	-0.549076	0.824315	-0.731717	0.449254
ENSFDAG00000007949	-0.887086	0.582606	-0.693468	0.553386
ENSFDAG00000008070	-0.506784	0.937278	-0.859201	0.491648
ENSFDAG00000008203	-0.535313	0.723526	-0.837953	0.471245
ENSFDAG00000008206	-0.720823	1.23171	-1.39512	0.303419
ENSFDAG00000008405	-0.533791	0.705774	-0.352104	1.12472
ENSFDAG00000008459	-0.43781	0.77009	-0.676645	0.563392
ENSFDAG00000008520	-1.56523	0.76043	-1.29529	0.589131
ENSFDAG00000008830	-0.846805	0.473424	-0.663726	0.632073
ENSFDAG00000008870	-0.465102	0.679776	-0.600203	0.684741
ENSFDAG00000008936	-0.494759	0.556023	-0.288504	0.877857
ENSFDAG00000008981	-1.11822	1.23813	-1.33651	0.433122
ENSFDAG00000009190	-0.379768	1.00254	-0.639422	0.636737
ENSFDAG00000009249	-0.762323	0.79971	-1.04158	0.528182
ENSFDAG00000009315	-0.654488	1.07512	-0.973054	0.404438
ENSFDAG00000009326	-0.631726	0.731055	-0.418494	1.04998
ENSFDAG00000009403	-0.510193	0.853948	-0.500382	0.743123
ENSFDAG00000009546	-0.422939	1.07297	-0.781305	0.405975
ENSFDAG00000009611	-0.431557	0.780119	-0.783215	0.688829
ENSFDAG00000009616	-0.431482	1.22539	-0.955922	0.332666
ENSFDAG00000009629	-0.679368	0.867544	-0.452899	0.933456
ENSFDAG00000009709	-1.04339	0.957863	-1.39012	0.347839
ENSFDAG00000009790	-0.784616	0.930425	-0.848722	0.42408
ENSFDAG00000009817	-0.83615	0.924179	-0.871122	0.464003
ENSFDAG00000009890	-0.359111	1.07987	-0.683199	0.472699
ENSFDAG00000009919	-0.380804	0.874291	-0.539457	0.732291
ENSFDAG00000009956	-1.54258	0.731724	-0.471511	1.31009
ENSFDAG00000010103	-1.08698	0.364692	-0.526415	0.830209
ENSFDAG00000010218	-0.582261	0.751801	-0.531778	0.699897
ENSFDAG00000010237	-0.641762	1.22085	-1.38116	0.500752
ENSFDAG00000010286	-1.18656	0.657235	-0.800055	0.623863
ENSFDAG00000010414	-0.671922	0.738127	-0.97631	0.91991
ENSFDAG00000010499	-0.505321	0.652051	-0.638008	0.570037
ENSFDAG00000010572	-0.402862	0.695023	-0.639482	0.589434
ENSFDAG00000010574	-0.51107	1.11589	-0.825471	0.353385
ENSFDAG00000010690	-1.8142	0.915245	-1.74408	0.344011
ENSFDAG00000010738	-1.03685	0.919704	-1.4614	0.301459
ENSFDAG00000010773	-0.551003	1.17557	-1.12209	0.28468
ENSFDAG00000010793	-0.343528	1.03998	-0.966536	0.349848
ENSFDAG00000010811	-1.06735	0.528392	-0.441341	0.872715
ENSFDAG00000010815	-1.45547	1.03452	-1.68649	0.358274
ENSFDAG00000010819	-0.363679	0.946336	-0.736983	0.483415
ENSFDAG00000010850	-0.879001	1.01184	-1.39952	0.292778
ENSFDAG00000010928	-0.485778	0.833338	-0.738702	0.940493
ENSFDAG00000010933	-0.713468	1.39316	-1.39069	0.549379
ENSFDAG00000010986	-0.539472	0.580294	-0.572695	0.777341
ENSFDAG00000011104	-0.623967	0.74737	-0.598974	0.759976
ENSFDAG00000011126	-0.910031	1.21514	-1.43672	0.331658
ENSFDAG00000011196	-0.937342	0.620289	-0.463328	0.887214
ENSFDAG00000011230	-0.734404	0.95934	-1.04717	0.526711
ENSFDAG00000011246	-0.456667	1.08341	-1.01505	0.409706
ENSFDAG00000011269	-0.583041	0.858784	-0.794436	0.594723
ENSFDAG00000011302	-0.499084	0.933497	-0.66866	0.886044
ENSFDAG00000011312	-0.728249	0.42583	-0.392417	0.671949
ENSFDAG00000011378	-0.684811	1.54615	-1.37116	0.48797
ENSFDAG00000011415	-0.489496	0.700447	-0.640674	0.407129
ENSFDAG00000011426	-0.529768	0.817748	-0.788335	0.575357
ENSFDAG00000011628	-0.493089	0.68247	-0.761157	0.434177
ENSFDAG00000011667	-1.0969	1.10463	-1.03872	0.477305
ENSFDAG00000011719	-0.64314	1.02282	-1.38631	0.371275
ENSFDAG00000011744	-0.491445	0.55041	-0.446189	0.706887
ENSFDAG00000011832	-1.09777	1.24459	-1.25272	0.364862
ENSFDAG00000011879	-0.757387	1.01165	-0.968376	0.393724
ENSFDAG00000011918	-1.36295	0.35402	-0.302924	0.91253
ENSFDAG00000011963	-1.13786	0.767805	-0.384292	0.84284
ENSFDAG00000012004	-0.949048	0.380699	-0.378262	0.742694
ENSFDAG00000012037	-0.449416	0.821779	-0.675781	0.851166
ENSFDAG00000012068	-0.855126	1.10806	-1.46235	0.302033
ENSFDAG00000012093	-0.573554	1.09557	-1.02539	0.523369
ENSFDAG00000012109	-0.600275	0.726133	-0.47854	0.813956
ENSFDAG00000012119	-0.549472	0.794657	-0.506239	0.66751
ENSFDAG00000012137	-1.0389	1.01369	-1.15362	0.436103
ENSFDAG00000012145	-0.779386	0.712642	-0.42105	1.0683
ENSFDAG00000012207	-0.604754	0.835152	-0.594193	0.445306
ENSFDAG00000012305	-0.881671	1.50444	-1.3734	0.374382
ENSFDAG00000012313	-0.529195	0.854014	-0.469886	1.03354
ENSFDAG00000012341	-1.88644	1.42021	-1.74266	0.384612
ENSFDAG00000012430	-0.67245	0.907021	-0.841417	0.760667
ENSFDAG00000012514	-0.586652	0.834554	-0.792119	0.652559
ENSFDAG00000012519	-0.962093	1.36897	-1.36253	0.404234
ENSFDAG00000012594	-0.993083	0.365653	-0.356237	0.767798
ENSFDAG00000012764	-1.61574	1.05832	-1.97104	0.282444
ENSFDAG00000012840	-1.18763	0.939661	-0.322159	1.13036
ENSFDAG00000012912	-0.460004	0.909505	-0.913688	0.713111
ENSFDAG00000012995	-0.447619	0.665103	-0.44924	0.707647
ENSFDAG00000013012	-0.601744	0.700432	-0.837018	0.650526
ENSFDAG00000013023	-0.919907	1.08984	-1.37662	0.391835
ENSFDAG00000013059	-0.420091	0.877103	-0.748742	0.592164
ENSFDAG00000013177	-1.55502	1.04428	-1.07019	0.438816
