# Supplementary material for: Morphological and genomic shifts in mole-rat ‘queens’ increase fecundity but reduce skeletal integrity
Source: eLife. 2021 Apr 12;10:e65760. doi: 10.7554/eLife.65760 (PMC8104968; doi:10.7554/eLife.65760)
Supplement: Supplementary file 7. [file elife-65760-supp7.xlsx]

## Sheet: Table S7
Supplementary File 7. Gene ontology (GO) enrichment results of genes up-regulated with queen status.
Gene ontology term name	Odds ratio (OR)	Bonferroni corrected p	Lower 95% OR	Upper 95% OR	log2(OR)	log2(lower 95% OR)	log2(upper 95% OR)	Query1	Term2	Query and term overlap	Domain size3	Term group4	Term depth5	Genes in the query and term overlap
leukocyte chemotaxis	8.99928	0.0265	3.63004	19.4902	3.16981	1.85998	4.28468	111	71	8	7481	4	1	ENSFDAG00000003642,ENSFDAG00000006589,ENSFDAG00000010237,ENSFDAG00000014017,ENSFDAG00000015517,ENSFDAG00000017609,ENSFDAG00000018746,ENSFDAG00000018795
superoxide anion generation	39.1972	0.0415	8.2896	157.512	5.29268	3.0513	7.29931	111	11	4	7481	3	1	ENSFDAG00000008203,ENSFDAG00000011667,ENSFDAG00000014156,ENSFDAG00000015372
tissue remodeling	10.3214	0.0106	4.13849	22.5304	3.36756	2.0491	4.4938	111	63	8	7481	1	1	ENSFDAG00000003642,ENSFDAG00000005799,ENSFDAG00000009326,ENSFDAG00000012430,ENSFDAG00000015372,ENSFDAG00000015535,ENSFDAG00000016821,ENSFDAG00000017834
bone remodeling	16.7618	0.015	5.50751	43.0004	4.0671	2.4614	5.42628	111	31	6	7481	1	2	ENSFDAG00000003642,ENSFDAG00000005799,ENSFDAG00000015372,ENSFDAG00000015535,ENSFDAG00000016821,ENSFDAG00000017834
bone resorption	24.7413	0.0192	6.84535	74.4706	4.62885	2.77512	6.2186	111	19	5	7481	1	3	ENSFDAG00000003642,ENSFDAG00000005799,ENSFDAG00000015372,ENSFDAG00000015535,ENSFDAG00000016821
positive regulation of tissue remodeling	49.4798	0.00142	12.167	185.689	5.62877	3.6049	7.53674	111	12	5	7481	1	1	ENSFDAG00000003642,ENSFDAG00000005799,ENSFDAG00000009326,ENSFDAG00000015535,ENSFDAG00000016821
positive regulation of bone remodeling	91.1315	0.00461	15.2518	622.397	6.50988	3.93091	9.28169	111	7	4	7481	1	2	ENSFDAG00000003642,ENSFDAG00000005799,ENSFDAG00000015535,ENSFDAG00000016821
positive regulation of bone resorption	91.1315	0.00461	15.2518	622.397	6.50988	3.93091	9.28169	111	7	4	7481	1	1	ENSFDAG00000003642,ENSFDAG00000005799,ENSFDAG00000015535,ENSFDAG00000016821
defense response	4.58337	0.000193	2.70406	7.47445	2.19641	1.43513	2.90197	111	399	22	7481	8	1	ENSFDAG00000003642,ENSFDAG00000004439,ENSFDAG00000005603,ENSFDAG00000006280,ENSFDAG00000006589,ENSFDAG00000007107,ENSFDAG00000007481,ENSFDAG00000008203,ENSFDAG00000008870,ENSFDAG00000011628,ENSFDAG00000012093,ENSFDAG00000012430,ENSFDAG00000012514,ENSFDAG00000014241,ENSFDAG00000014980,ENSFDAG00000015057,ENSFDAG00000015372,ENSFDAG00000015459,ENSFDAG00000016970,ENSFDAG00000018555,ENSFDAG00000018795,…
astrocyte cell migration	Inf	0.00944	27.7557	Inf	Inf	4.79471	Inf	111	3	3	7481	6	1	ENSFDAG00000006589,ENSFDAG00000012912,ENSFDAG00000015517
cytokine secretion	8.58802	0.0361	3.47042	18.5501	3.10233	1.79511	4.21336	111	74	8	7481	5	1	ENSFDAG00000004439,ENSFDAG00000006589,ENSFDAG00000008870,ENSFDAG00000011628,ENSFDAG00000014980,ENSFDAG00000015459,ENSFDAG00000017272,ENSFDAG00000018555
response to stimulus	2.38773	0.0136	1.60894	3.56292	1.25564	0.686108	1.83306	111	2677	63	7481	2	1	ENSFDAG00000000809,ENSFDAG00000001112,ENSFDAG00000001690,ENSFDAG00000003642,ENSFDAG00000004439,ENSFDAG00000005587,ENSFDAG00000005603,ENSFDAG00000006280,ENSFDAG00000006589,ENSFDAG00000006648,ENSFDAG00000007107,ENSFDAG00000007481,ENSFDAG00000007533,ENSFDAG00000007619,ENSFDAG00000007636,ENSFDAG00000008070,ENSFDAG00000008203,ENSFDAG00000008459,ENSFDAG00000008870,ENSFDAG00000009326,ENSFDAG00000009919,…
response to chemical	2.63376	0.0126	1.72785	3.96233	1.39712	0.788975	1.98635	111	1296	39	7481	2	2	ENSFDAG00000001690,ENSFDAG00000003642,ENSFDAG00000005587,ENSFDAG00000006280,ENSFDAG00000006589,ENSFDAG00000007481,ENSFDAG00000008070,ENSFDAG00000008459,ENSFDAG00000008870,ENSFDAG00000009326,ENSFDAG00000010237,ENSFDAG00000011628,ENSFDAG00000012093,ENSFDAG00000012137,ENSFDAG00000012514,ENSFDAG00000012764,ENSFDAG00000014017,ENSFDAG00000014643,ENSFDAG00000014980,ENSFDAG00000015057,ENSFDAG00000015372,…
cellular response to chemical stimulus	2.92619	0.00355	1.89152	4.44955	1.54902	0.919545	2.15366	111	1037	35	7481	2	3	ENSFDAG00000001690,ENSFDAG00000003642,ENSFDAG00000005587,ENSFDAG00000006280,ENSFDAG00000006589,ENSFDAG00000007481,ENSFDAG00000008070,ENSFDAG00000008459,ENSFDAG00000009326,ENSFDAG00000010237,ENSFDAG00000011628,ENSFDAG00000012093,ENSFDAG00000012137,ENSFDAG00000012514,ENSFDAG00000012764,ENSFDAG00000014017,ENSFDAG00000014643,ENSFDAG00000014980,ENSFDAG00000015057,ENSFDAG00000015459,ENSFDAG00000015517,…
response to external stimulus	4.11077	2e-05	2.58723	6.37879	2.03941	1.37141	2.67328	111	639	30	7481	2	2	ENSFDAG00000003642,ENSFDAG00000004439,ENSFDAG00000005603,ENSFDAG00000006280,ENSFDAG00000006589,ENSFDAG00000006648,ENSFDAG00000007481,ENSFDAG00000008459,ENSFDAG00000008870,ENSFDAG00000009326,ENSFDAG00000010237,ENSFDAG00000011628,ENSFDAG00000012093,ENSFDAG00000012764,ENSFDAG00000014017,ENSFDAG00000014241,ENSFDAG00000014980,ENSFDAG00000015057,ENSFDAG00000015372,ENSFDAG00000015459,ENSFDAG00000015517,…
taxis	5.4586	0.0241	2.6736	10.2321	2.44853	1.41878	3.35502	111	172	12	7481	2	3	ENSFDAG00000003642,ENSFDAG00000006589,ENSFDAG00000008459,ENSFDAG00000010237,ENSFDAG00000012764,ENSFDAG00000014017,ENSFDAG00000015517,ENSFDAG00000017272,ENSFDAG00000017609,ENSFDAG00000018746,ENSFDAG00000018795,ENSFDAG00000020792
chemotaxis	5.4935	0.0227	2.69046	10.2985	2.45773	1.42785	3.36437	111	171	12	7481	2	4	ENSFDAG00000003642,ENSFDAG00000006589,ENSFDAG00000008459,ENSFDAG00000010237,ENSFDAG00000012764,ENSFDAG00000014017,ENSFDAG00000015517,ENSFDAG00000017272,ENSFDAG00000017609,ENSFDAG00000018746,ENSFDAG00000018795,ENSFDAG00000020792
response to biotic stimulus	4.17142	0.045	2.21666	7.35161	2.06054	1.14839	2.87806	111	281	15	7481	2	2	ENSFDAG00000004439,ENSFDAG00000005603,ENSFDAG00000006280,ENSFDAG00000006648,ENSFDAG00000007481,ENSFDAG00000011628,ENSFDAG00000012093,ENSFDAG00000014241,ENSFDAG00000014980,ENSFDAG00000015057,ENSFDAG00000015372,ENSFDAG00000015459,ENSFDAG00000016970,ENSFDAG00000018555,ENSFDAG00000021370
response to external biotic stimulus	4.48527	0.0203	2.38129	7.91429	2.1652	1.25174	2.98446	111	263	15	7481	2	3	ENSFDAG00000004439,ENSFDAG00000005603,ENSFDAG00000006280,ENSFDAG00000006648,ENSFDAG00000007481,ENSFDAG00000011628,ENSFDAG00000012093,ENSFDAG00000014241,ENSFDAG00000014980,ENSFDAG00000015057,ENSFDAG00000015372,ENSFDAG00000015459,ENSFDAG00000016970,ENSFDAG00000018555,ENSFDAG00000021370
response to other organism	4.5039	0.0194	2.39112	7.948	2.17117	1.25769	2.99059	111	262	15	7481	2	4	ENSFDAG00000004439,ENSFDAG00000005603,ENSFDAG00000006280,ENSFDAG00000006648,ENSFDAG00000007481,ENSFDAG00000011628,ENSFDAG00000012093,ENSFDAG00000014241,ENSFDAG00000014980,ENSFDAG00000015057,ENSFDAG00000015372,ENSFDAG00000015459,ENSFDAG00000016970,ENSFDAG00000018555,ENSFDAG00000021370
immune system process	5.08968	3.36e-10	3.35779	7.63546	2.34758	1.74751	2.93272	111	829	42	7481	2	1	ENSFDAG00000000040,ENSFDAG00000000809,ENSFDAG00000001690,ENSFDAG00000003642,ENSFDAG00000004439,ENSFDAG00000005603,ENSFDAG00000005799,ENSFDAG00000006589,ENSFDAG00000007107,ENSFDAG00000007481,ENSFDAG00000007563,ENSFDAG00000007619,ENSFDAG00000008203,ENSFDAG00000008459,ENSFDAG00000009315,ENSFDAG00000009611,ENSFDAG00000009629,ENSFDAG00000009919,ENSFDAG00000010237,ENSFDAG00000011628,ENSFDAG00000012093,…
immune effector process	4.89499	0.0155	2.53742	8.79312	2.29131	1.34336	3.13638	111	225	14	7481	2	2	ENSFDAG00000004439,ENSFDAG00000007481,ENSFDAG00000009629,ENSFDAG00000009919,ENSFDAG00000010237,ENSFDAG00000011628,ENSFDAG00000013023,ENSFDAG00000014218,ENSFDAG00000014980,ENSFDAG00000015459,ENSFDAG00000015517,ENSFDAG00000015535,ENSFDAG00000016112,ENSFDAG00000021370
immune response	5.86085	7.79e-08	3.60596	9.2645	2.55111	1.85038	3.21171	111	410	27	7481	2	2	ENSFDAG00000001690,ENSFDAG00000003642,ENSFDAG00000004439,ENSFDAG00000005603,ENSFDAG00000006589,ENSFDAG00000007107,ENSFDAG00000007481,ENSFDAG00000007619,ENSFDAG00000008203,ENSFDAG00000008459,ENSFDAG00000009919,ENSFDAG00000010237,ENSFDAG00000011628,ENSFDAG00000012093,ENSFDAG00000013023,ENSFDAG00000014066,ENSFDAG00000014218,ENSFDAG00000014832,ENSFDAG00000014980,ENSFDAG00000015459,ENSFDAG00000015517,…
cell activation involved in immune response	7.74097	0.0232	3.32726	15.9866	2.95251	1.73434	3.99879	111	92	9	7481	2	3	ENSFDAG00000004439,ENSFDAG00000009919,ENSFDAG00000010237,ENSFDAG00000013023,ENSFDAG00000015459,ENSFDAG00000015517,ENSFDAG00000015535,ENSFDAG00000016112,ENSFDAG00000021370
leukocyte activation involved in immune response	8.03409	0.0176	3.44924	16.6206	3.00614	1.78628	4.0549	111	89	9	7481	2	4	ENSFDAG00000004439,ENSFDAG00000009919,ENSFDAG00000010237,ENSFDAG00000013023,ENSFDAG00000015459,ENSFDAG00000015517,ENSFDAG00000015535,ENSFDAG00000016112,ENSFDAG00000021370
regulation of immune system process	4.29554	0.000105	2.60925	6.84972	2.10284	1.38364	2.77604	111	492	25	7481	2	2	ENSFDAG00000003642,ENSFDAG00000004439,ENSFDAG00000007107,ENSFDAG00000007481,ENSFDAG00000007563,ENSFDAG00000009629,ENSFDAG00000010237,ENSFDAG00000011628,ENSFDAG00000013023,ENSFDAG00000014017,ENSFDAG00000014066,ENSFDAG00000014218,ENSFDAG00000014643,ENSFDAG00000014980,ENSFDAG00000015057,ENSFDAG00000015459,ENSFDAG00000015517,ENSFDAG00000015535,ENSFDAG00000016821,ENSFDAG00000017609,ENSFDAG00000017834,…
positive regulation of immune system process	4.20758	0.00701	2.36011	7.12441	2.07299	1.23885	2.83277	111	342	18	7481	2	2	ENSFDAG00000003642,ENSFDAG00000007107,ENSFDAG00000007481,ENSFDAG00000010237,ENSFDAG00000011628,ENSFDAG00000014017,ENSFDAG00000014066,ENSFDAG00000014218,ENSFDAG00000014643,ENSFDAG00000014980,ENSFDAG00000015459,ENSFDAG00000015517,ENSFDAG00000015535,ENSFDAG00000016821,ENSFDAG00000018555,ENSFDAG00000018746,ENSFDAG00000018795,ENSFDAG00000021370
immune system development	3.63977	0.0439	2.04474	6.15274	1.86385	1.03192	2.62123	111	390	18	7481	2	2	ENSFDAG00000000040,ENSFDAG00000000809,ENSFDAG00000003642,ENSFDAG00000004439,ENSFDAG00000007563,ENSFDAG00000009315,ENSFDAG00000009611,ENSFDAG00000009629,ENSFDAG00000009919,ENSFDAG00000012093,ENSFDAG00000013023,ENSFDAG00000014643,ENSFDAG00000015517,ENSFDAG00000015535,ENSFDAG00000016821,ENSFDAG00000017272,ENSFDAG00000017834,ENSFDAG00000021370
hematopoietic or lymphoid organ development	3.90442	0.0183	2.19161	6.60573	1.96511	1.13199	2.72372	111	366	18	7481	2	3	ENSFDAG00000000040,ENSFDAG00000000809,ENSFDAG00000003642,ENSFDAG00000004439,ENSFDAG00000007563,ENSFDAG00000009315,ENSFDAG00000009611,ENSFDAG00000009629,ENSFDAG00000009919,ENSFDAG00000012093,ENSFDAG00000013023,ENSFDAG00000014643,ENSFDAG00000015517,ENSFDAG00000015535,ENSFDAG00000016821,ENSFDAG00000017272,ENSFDAG00000017834,ENSFDAG00000021370
hemopoiesis	4.12763	0.00898	2.31562	6.98852	2.04532	1.2114	2.80499	111	348	18	7481	2	4	ENSFDAG00000000040,ENSFDAG00000000809,ENSFDAG00000003642,ENSFDAG00000004439,ENSFDAG00000007563,ENSFDAG00000009315,ENSFDAG00000009611,ENSFDAG00000009629,ENSFDAG00000009919,ENSFDAG00000012093,ENSFDAG00000013023,ENSFDAG00000014643,ENSFDAG00000015517,ENSFDAG00000015535,ENSFDAG00000016821,ENSFDAG00000017272,ENSFDAG00000017834,ENSFDAG00000021370
regulation of response to external stimulus	4.63988	0.0139	2.46222	8.19113	2.21409	1.29996	3.03406	111	255	15	7481	2	1	ENSFDAG00000003642,ENSFDAG00000006589,ENSFDAG00000007481,ENSFDAG00000010237,ENSFDAG00000011628,ENSFDAG00000012764,ENSFDAG00000014017,ENSFDAG00000014980,ENSFDAG00000015057,ENSFDAG00000015372,ENSFDAG00000015459,ENSFDAG00000015517,ENSFDAG00000017609,ENSFDAG00000018746,ENSFDAG00000018795
1Number of genes that were up-regulated in queen relative to nonbreeder mole-rat bones (at 10% FDR) and have been assigned to GO terms.
2Number of mole-rat genes that have been assigned to GO terms.
3Number of all genes tested in this study that have been assigned GO terms; refers to the background set of genes used for GO analysis.
4Arbitrary name; specifies GO terms that belong within the same nested hierarchy.
5The level of nesting of GO terms; within the same term group, terms with larger numbers are nested within terms of smaller numbers.
