# Supplementary material for: Morphological and genomic shifts in mole-rat ‘queens’ increase fecundity but reduce skeletal integrity
Source: eLife. 2021 Apr 12;10:e65760. doi: 10.7554/eLife.65760 (PMC8104968; doi:10.7554/eLife.65760)
Supplement: Supplementary file 8. [file elife-65760-supp8.xlsx]

## Sheet: Table S8
Supplementary File 8. Transcription factor binding motifs enriched in open chromatin regions near genes up-regulated with queen status.
Motif_Name	OR	log2(OR)	log2(lower 95% OR)	log2(upper 95% OR)	p-value from Fisher's exact test
ETS:E-box	4.1293	2.0459	1.11424	2.87031	2.65769e-05
HNF1b	2.98514	1.5778	0.316352	2.62568	0.00789427
SpiB	2.8412	1.5065	0.845076	2.12454	1.37851e-05
Reverb	2.42707	1.27921	0.387998	2.0703	0.00384389
Ets1-distal	2.42624	1.27872	0.628236	1.88758	9.11509e-05
HNF6	2.39615	1.26072	0.600541	1.87743	0.00021412
EWS:ERG-fusion	2.35625	1.23649	0.706028	1.75352	4.85601e-06
Cux2	2.19419	1.13369	0.38111	1.82106	0.00306555
PU.1	2.05792	1.04119	0.463848	1.59309	0.000284356
ELF3	1.96433	0.974039	0.438192	1.49466	0.000267775
ELF5	1.85293	0.889812	0.357199	1.40818	0.000809972
THRa	1.75103	0.808207	0.168856	1.408	0.00895405
MITF	1.63251	0.707096	0.168568	1.22947	0.00735833
