# Supplementary material for: Morphological and genomic shifts in mole-rat ‘queens’ increase fecundity but reduce skeletal integrity
Source: eLife. 2021 Apr 12;10:e65760. doi: 10.7554/eLife.65760 (PMC8104968; doi:10.7554/eLife.65760)
Supplement: Supplementary file 9. [file elife-65760-supp9.xlsx]

## Sheet: Table S9
Supplementary File 9. Sample info for bone sections stained with Safranin O.
Animal ID	Age (years)	Breeding status	Proportion growth plate fusion tibia	Chondrocyte columns/mm tibia	Proportion growth plate fusion LV7 caudal	Proportion growth plate fusion LV7 cranial	Chondrocyte columns/mm LV7 caudal	Chondrocyte columns/mm LV7 cranial
G10F023	3.95068	non-breeder	0.549	0.381388	0	0	3.00601	1.2278
G10F024	3.95342	breeder	0.231	1.36054	0.15618	0	1.65914	2.01189
GRF007	2.63288	non-breeder	0	5.17369	0.236753	0.252841	2.29172	1.60793
GRF001	3.3589	breeder	1	0	0.416408	0.31274	0.469631	1.76783
G10F026	3.64658	breeder	0.066	1.81474	0	0	2.69501	0
NOF009	2.94521	breeder	NA	NA	NA	0	1.36766	1.44317
NOF007	2.94795	non-breeder	0	3.72574	NA	NA	NA	NA
L2F020	3.08219	breeder	0.934	2.77393	0.202877	0.401706	0	2.39838
MAF008	2.52603	non-breeder	0	3.18243	0	0	0.858369	2.90076
MAF006	3.10137	breeder	0	2.76997	0	0	1.71783	2.34146
HEF001	3.57534	breeder	1	0	0	0	1.29258	2.0372
CRF002	3.99178	non-breeder	0.467	0.573477	0	0	5.38222	1.78444
CRF007	2.93973	breeder	1	0	0	0	2.52556	1.15407
