# Supplementary material for: Morphological and genomic shifts in mole-rat ‘queens’ increase fecundity but reduce skeletal integrity
Source: eLife. 2021 Apr 12;10:e65760. doi: 10.7554/eLife.65760 (PMC8104968; doi:10.7554/eLife.65760)
Supplement: Supplementary file 10. [file elife-65760-supp10.xlsx]

## Sheet: Table S10
Supplementary File 10. Effect of number of total offspring on mean cortical thickness per femur shaft decile
decile	beta (all pairs)	se (all pairs)	p (all pairs)	beta (pairs where queen had ≥ 6 offspring)	se (pairs where queen had ≥ 6 offspring)	p (pairs where queen had ≥ 6 offspring)	beta (pairs where queen had < 6 offspring)	se (pairs where queen had < 6 offspring)	p (pairs where queen had < 6 offspring)
1	-0.0113	0.00351283	0.0054	-0.0112	0.00422783	0.06923	0.0057	0.00725424	0.4743
2	-0.0178	0.00556923	0.0056	-0.012	0.00583339	0.12656	-0.0017	0.0132372	0.90593
3	-0.021	0.00587311	0.0025	-0.0196	0.00750831	0.07486	-0.0009	0.0123732	0.94732
4	-0.0225	0.00628477	0.0025	-0.0206	0.00615154	0.0398	0.0113	0.00622287	0.1439
5	-0.0326	0.00913734	0.0026	-0.0311	0.00711723	0.01931	0.0028	0.0102202	0.80093
6	-0.0391	0.010388	0.0017	-0.037	0.00677095	0.00157	0.0001	0.017579	0.99495
7	-0.0331	0.00919537	0.0024	-0.0316	0.00766702	0.00624	0.0129	0.016618	0.47947
8	-0.0159	0.0047953	0.0044	-0.0168	0.00560498	0.05474	0.0185	0.0141285	0.24232
9	-0.0058	0.00250548	0.0355	-0.0054	0.00269626	0.09118	0.017	0.00384148	0.01048
10	-0.0088	0.00288369	0.0075	-0.0079	0.0035624	0.10638	0.0051	0.00634325	0.45992
