# Supplementary figures and images for: Morphological and genomic shifts in mole-rat ‘queens’ increase fecundity but reduce skeletal integrity
Source: eLife journal article supplement (doi:10.7554/elife.65760), 2021-04-12

Estimated cell proportion

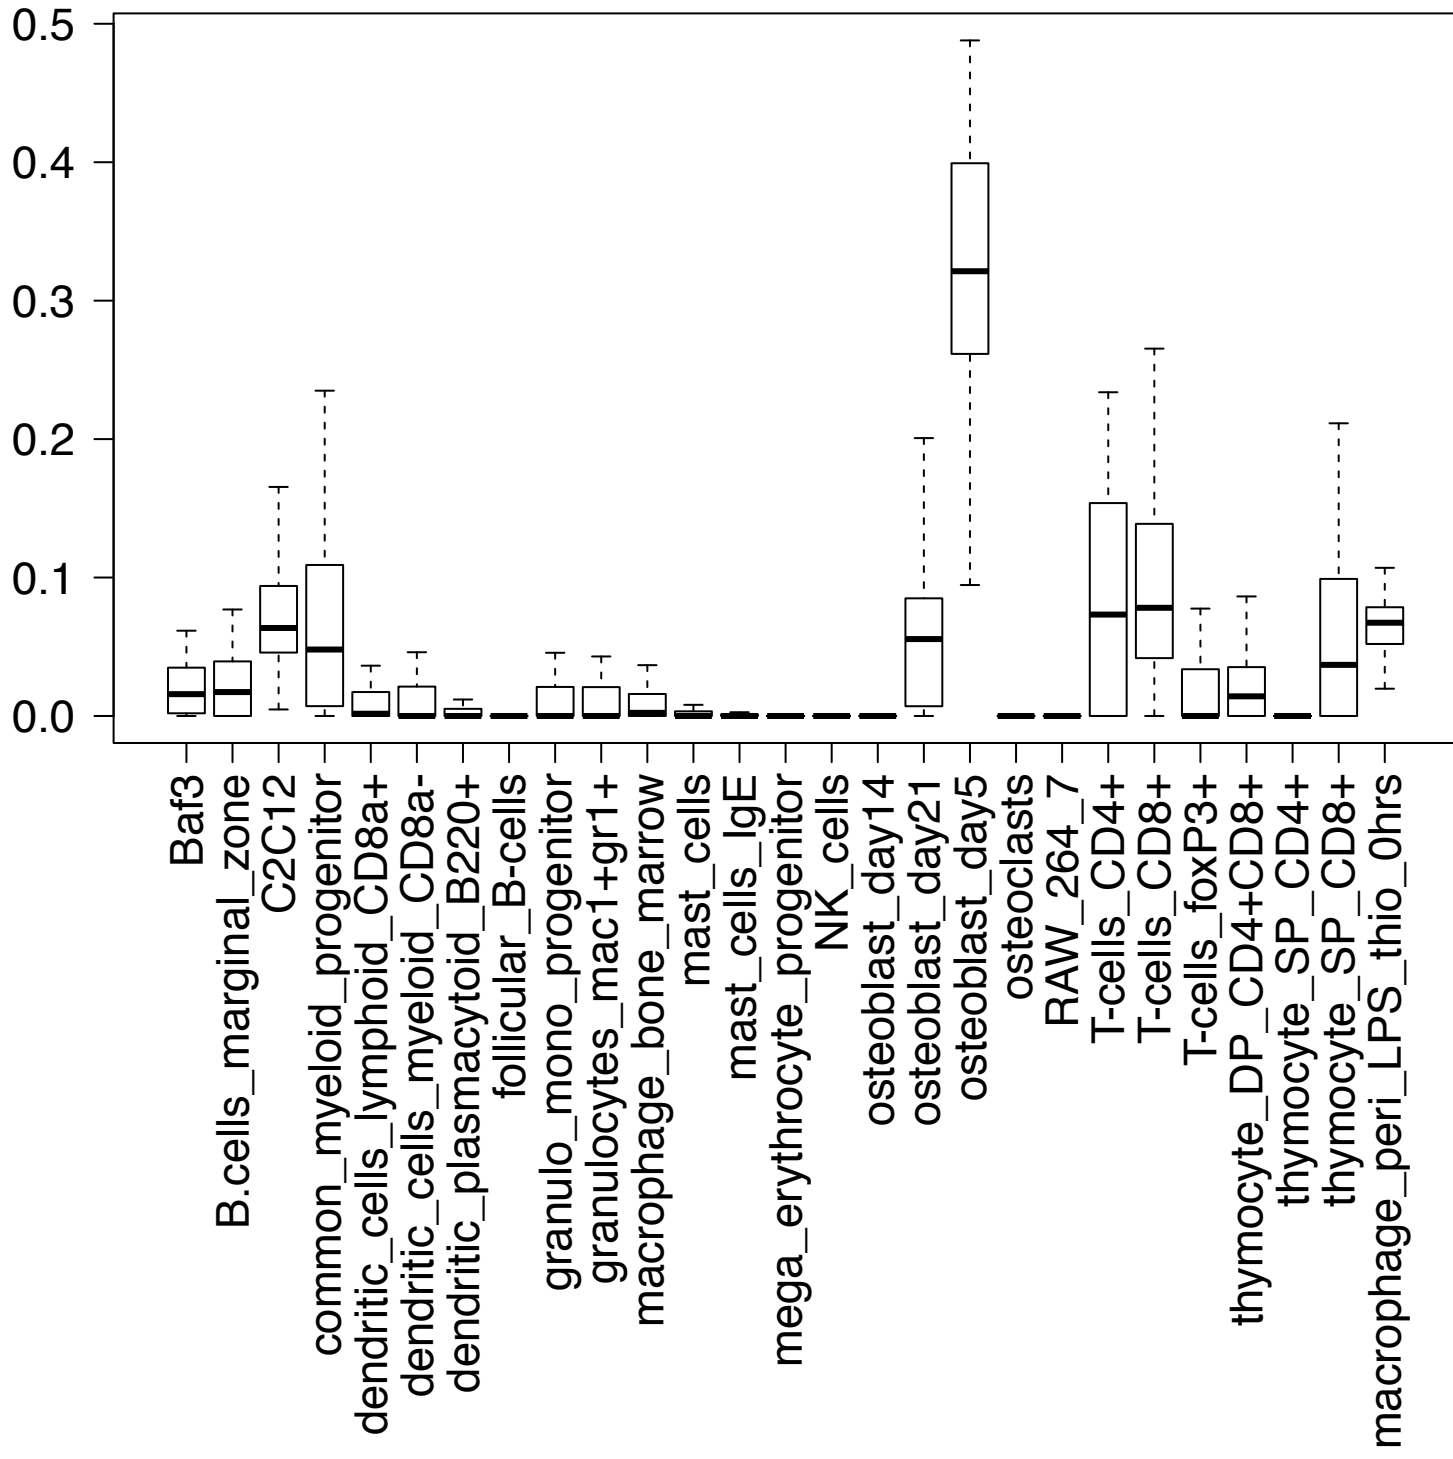

Supplement: supp [file elife-65760-supp-v1.zip]

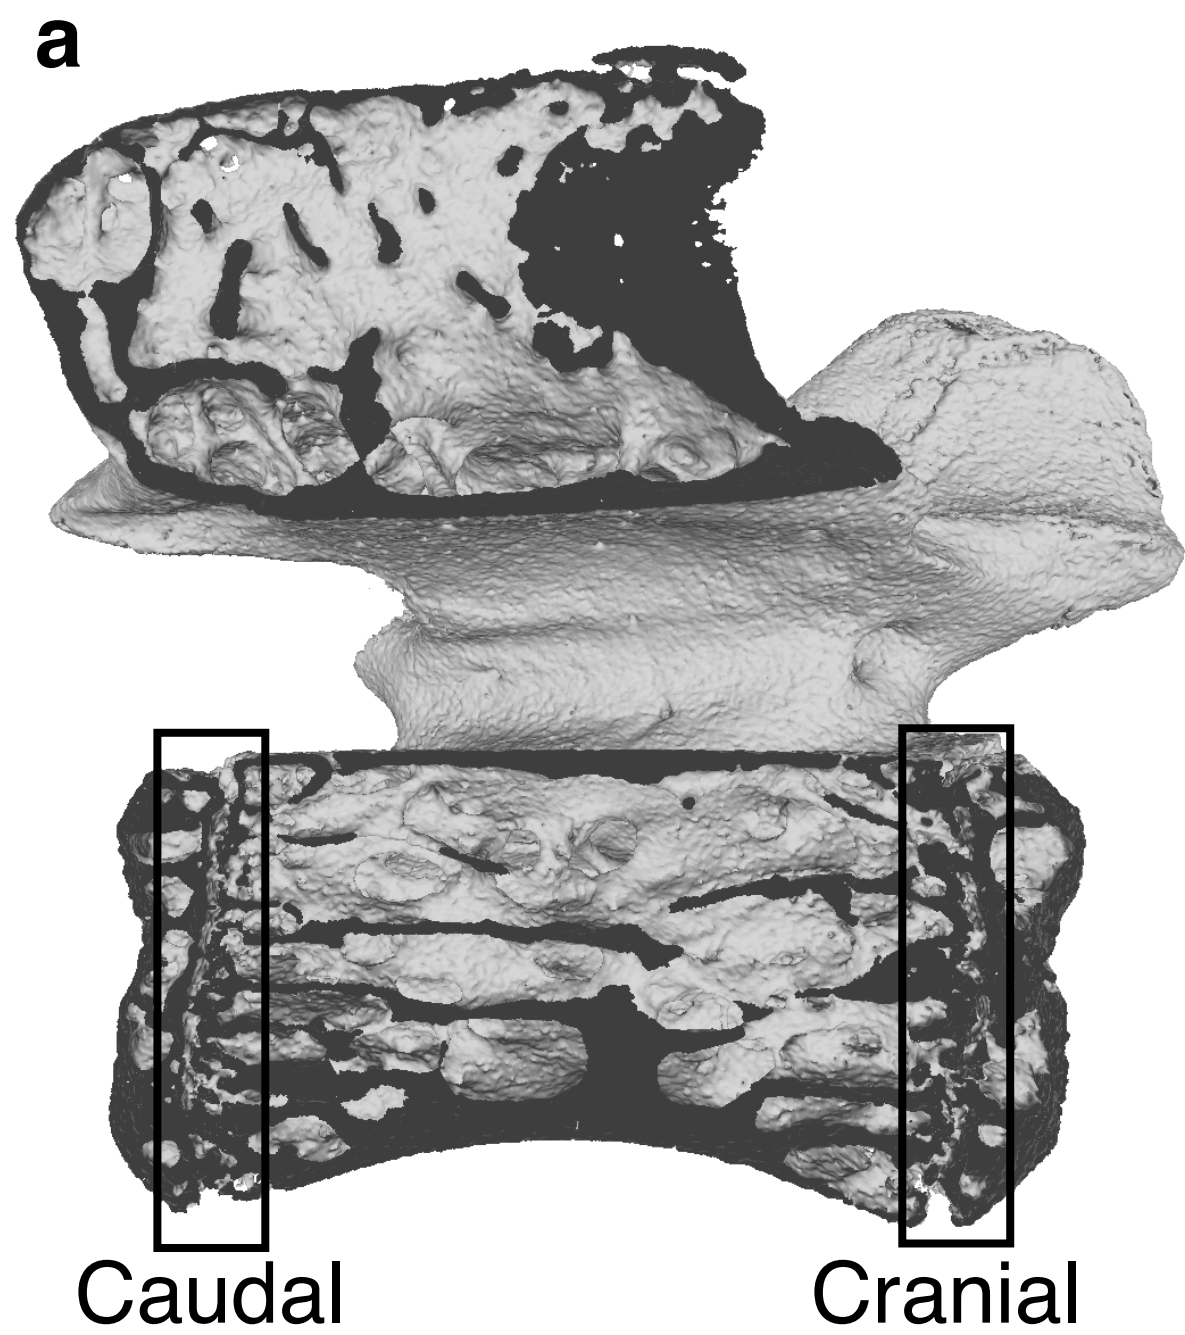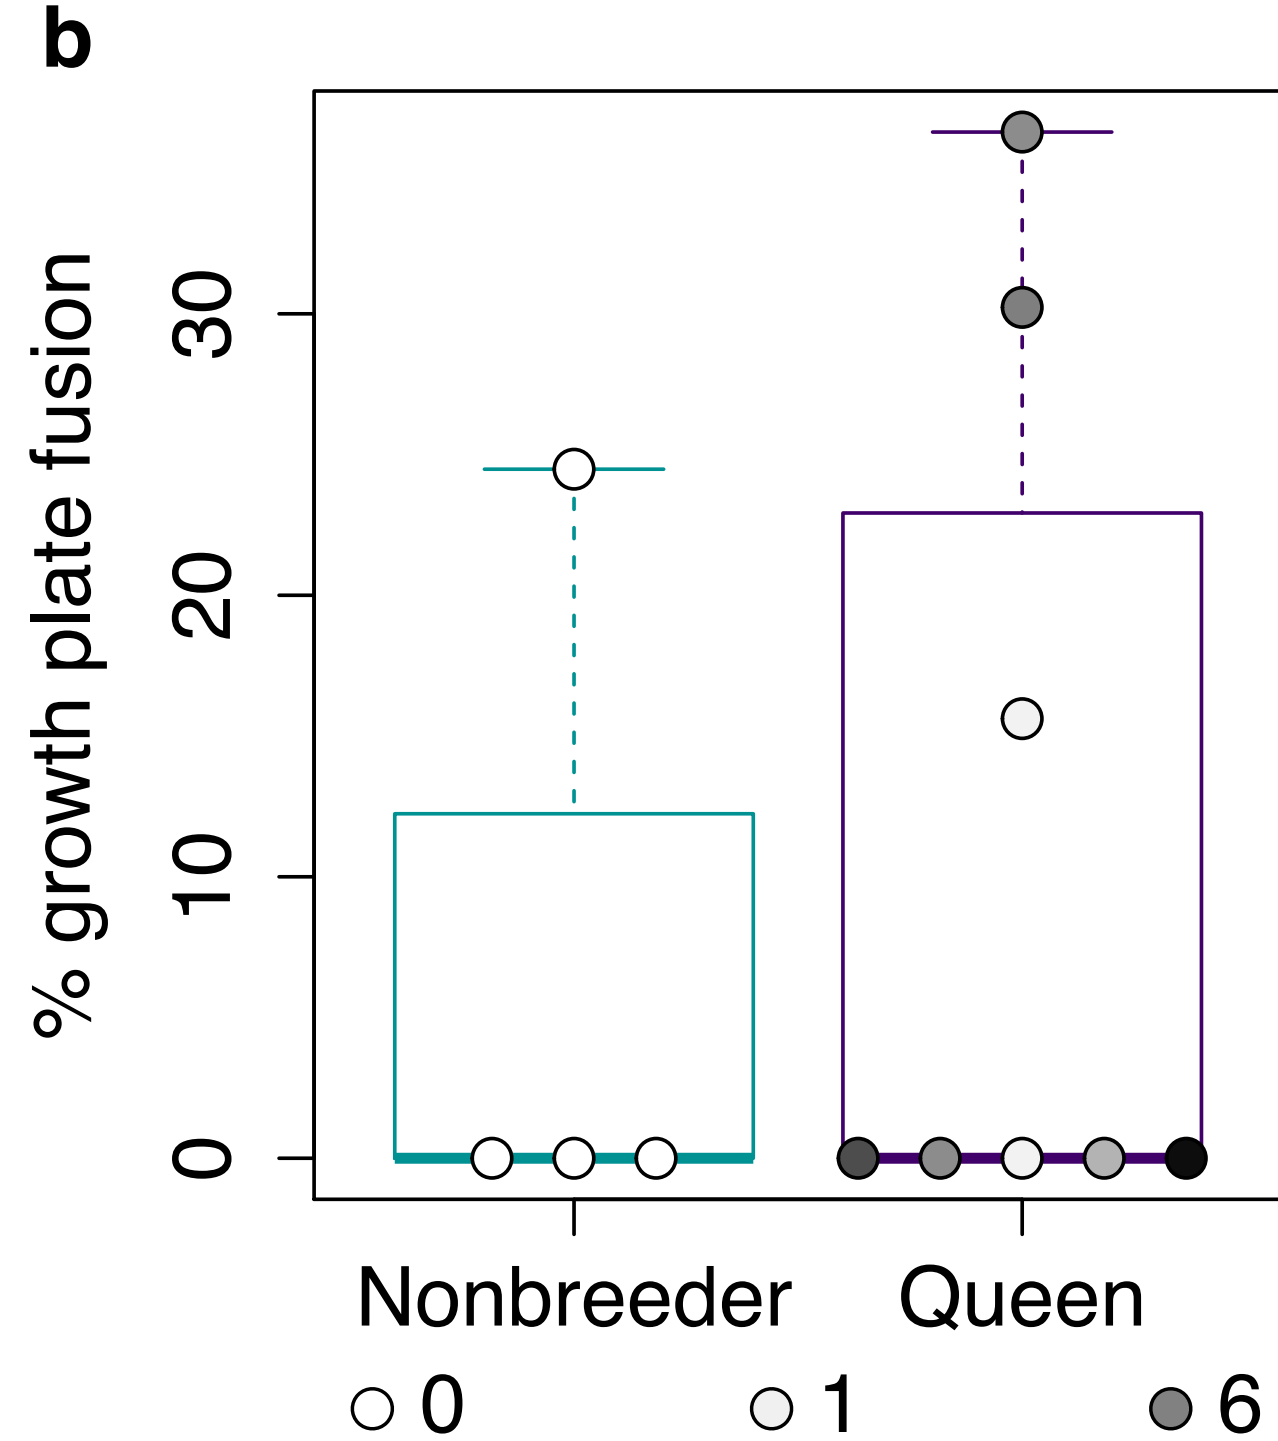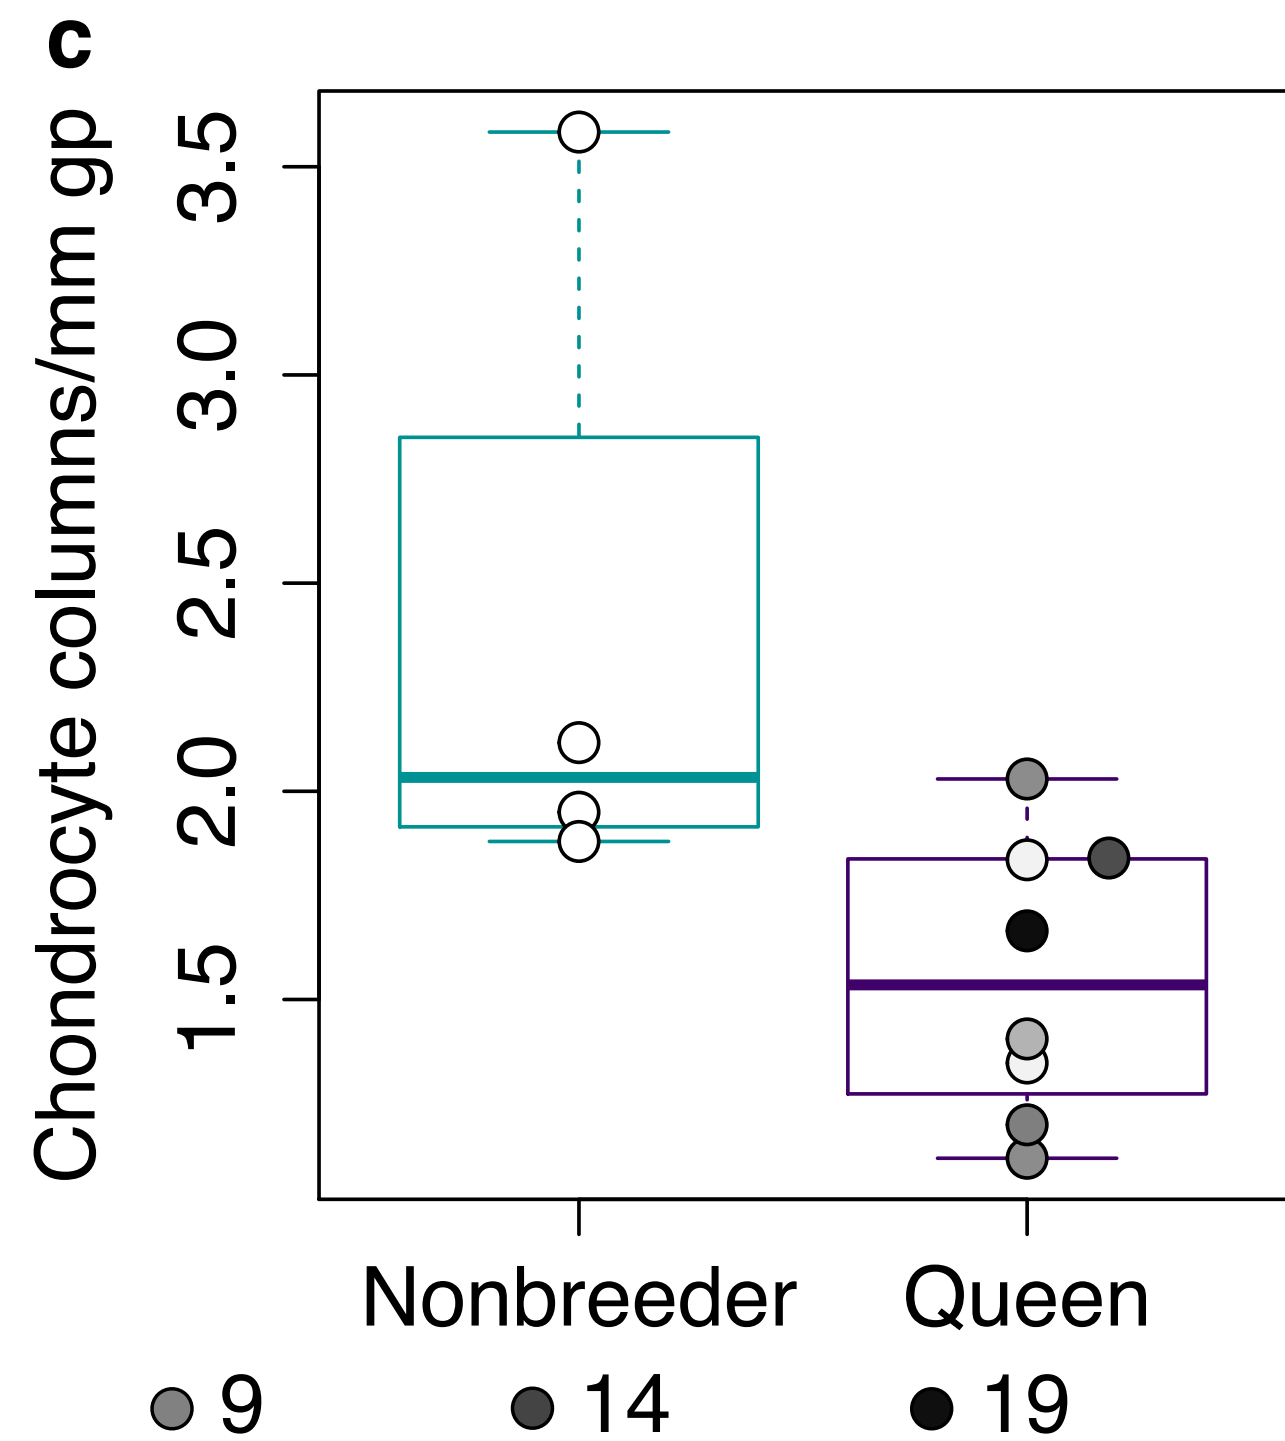

Supplement: supp [file elife-65760-supp-v1.zip]

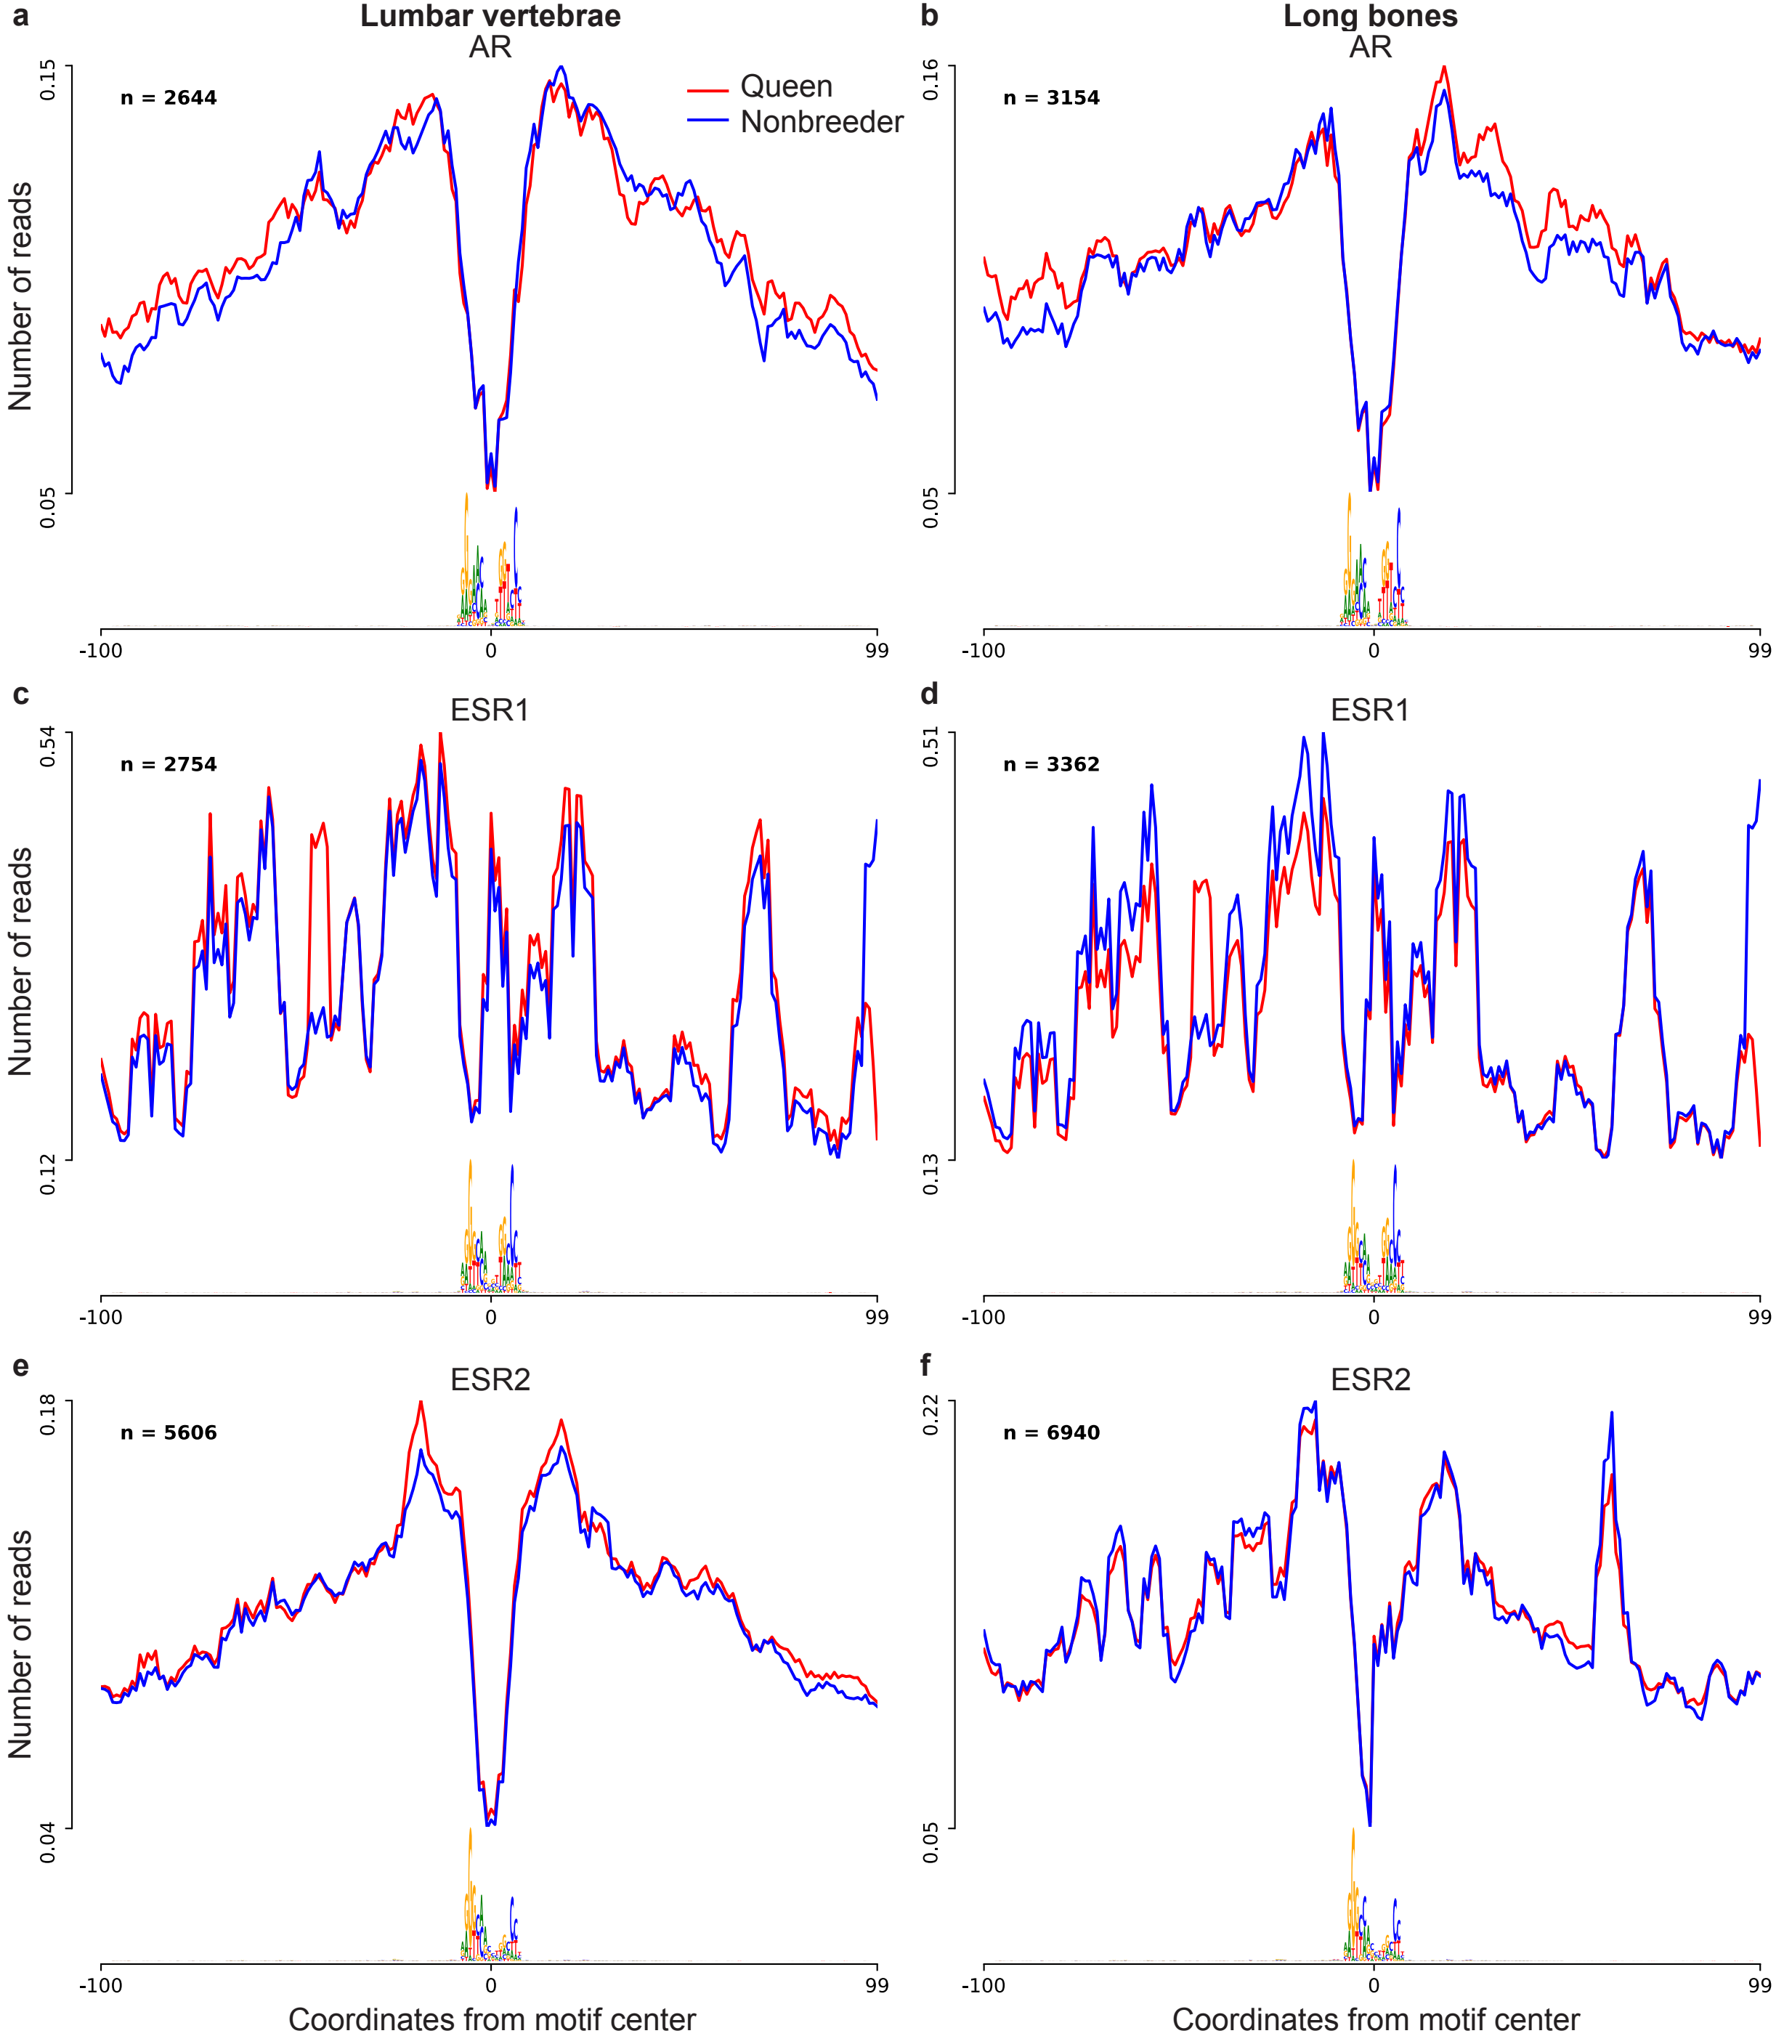

Supplement: supp [file elife-65760-supp-v1.zip]

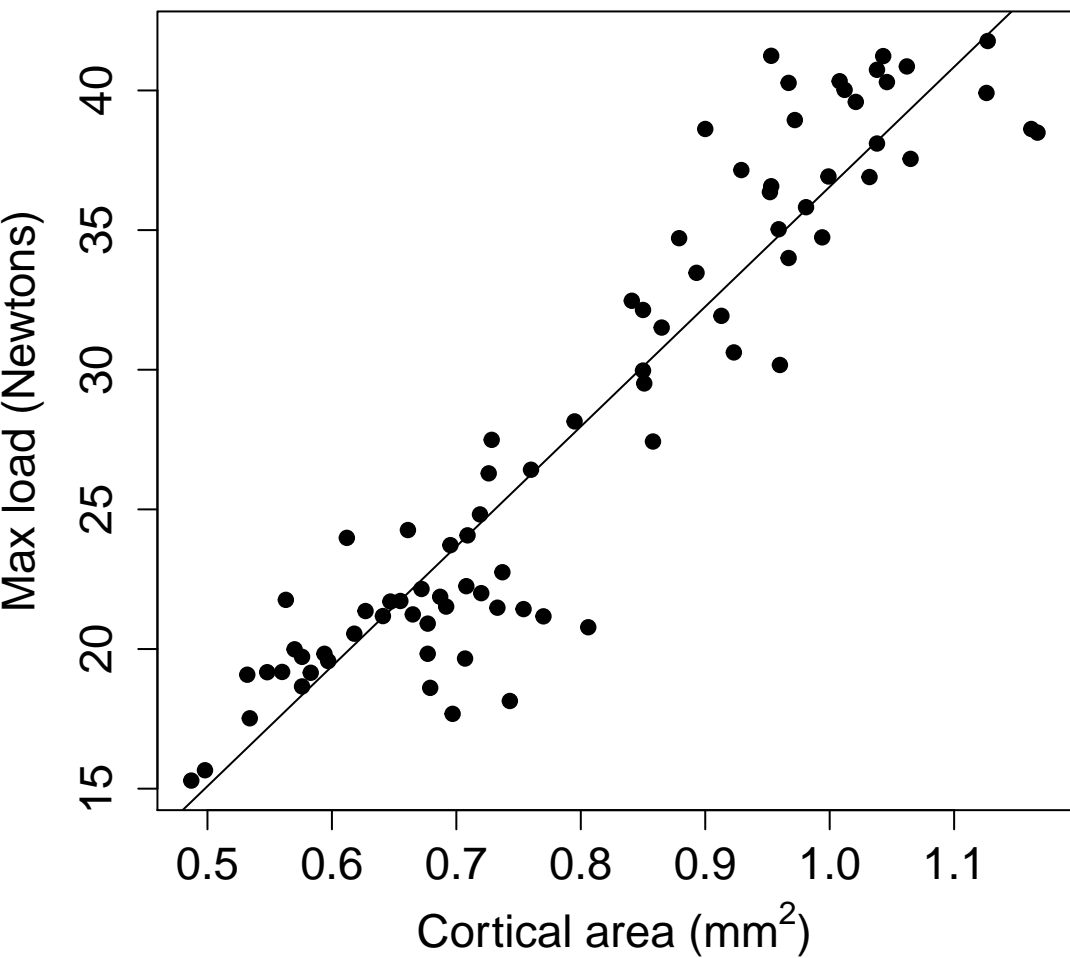

Supplement: supp [file elife-65760-supp-v1.zip]

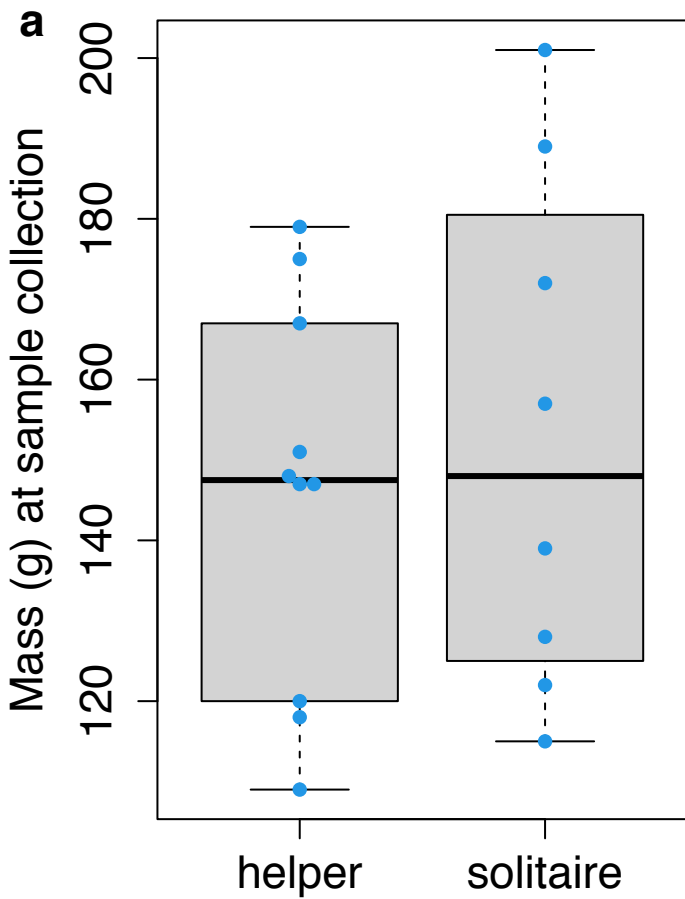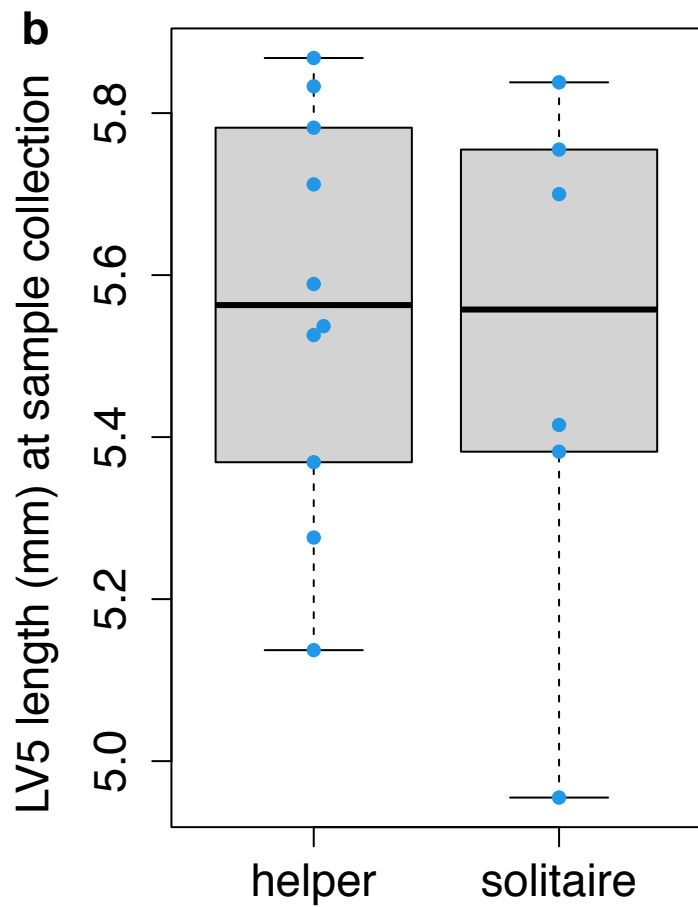

Supplement: supp [file elife-65760-supp-v1.zip]

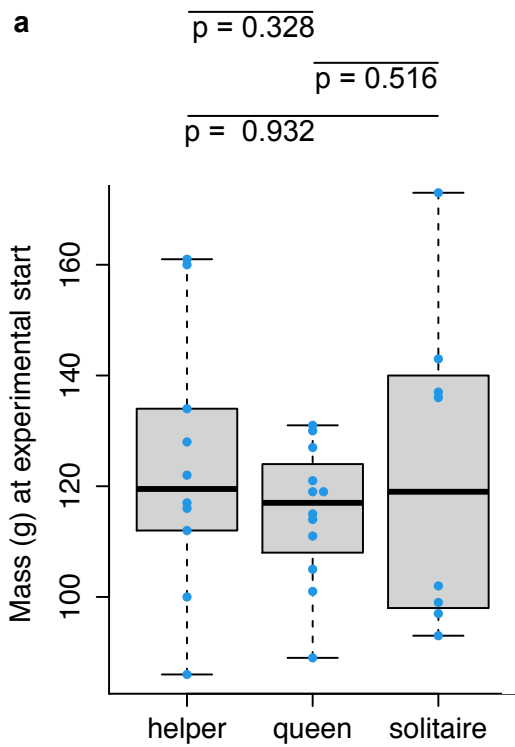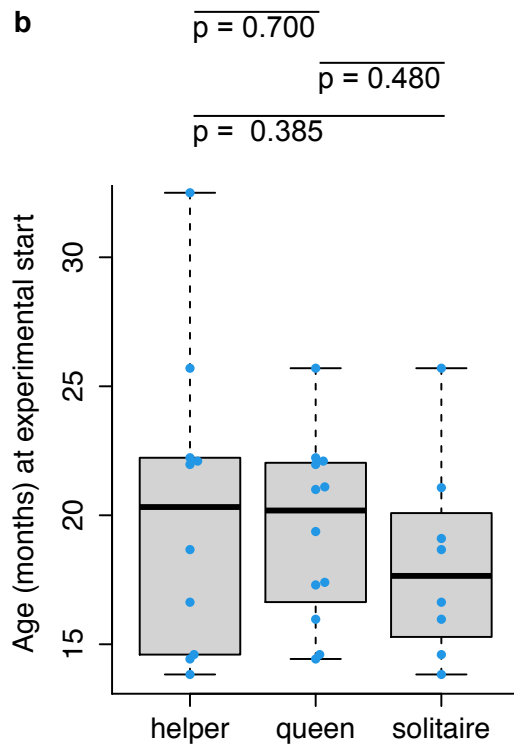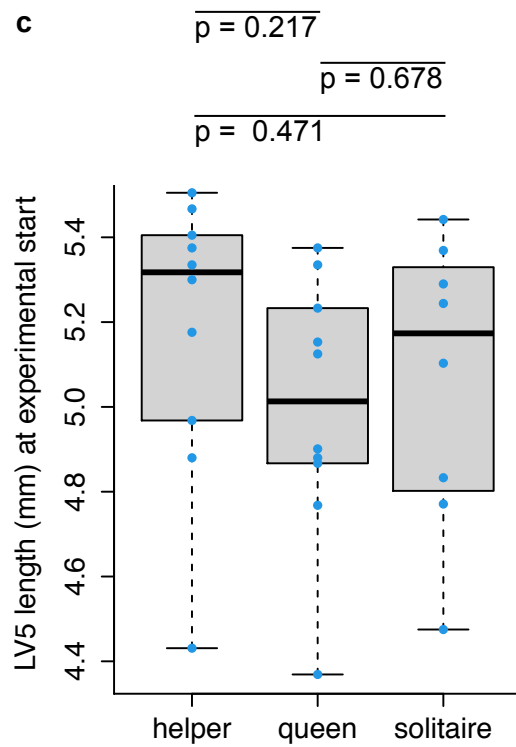

Supplement: supp [file elife-65760-supp-v1.zip]

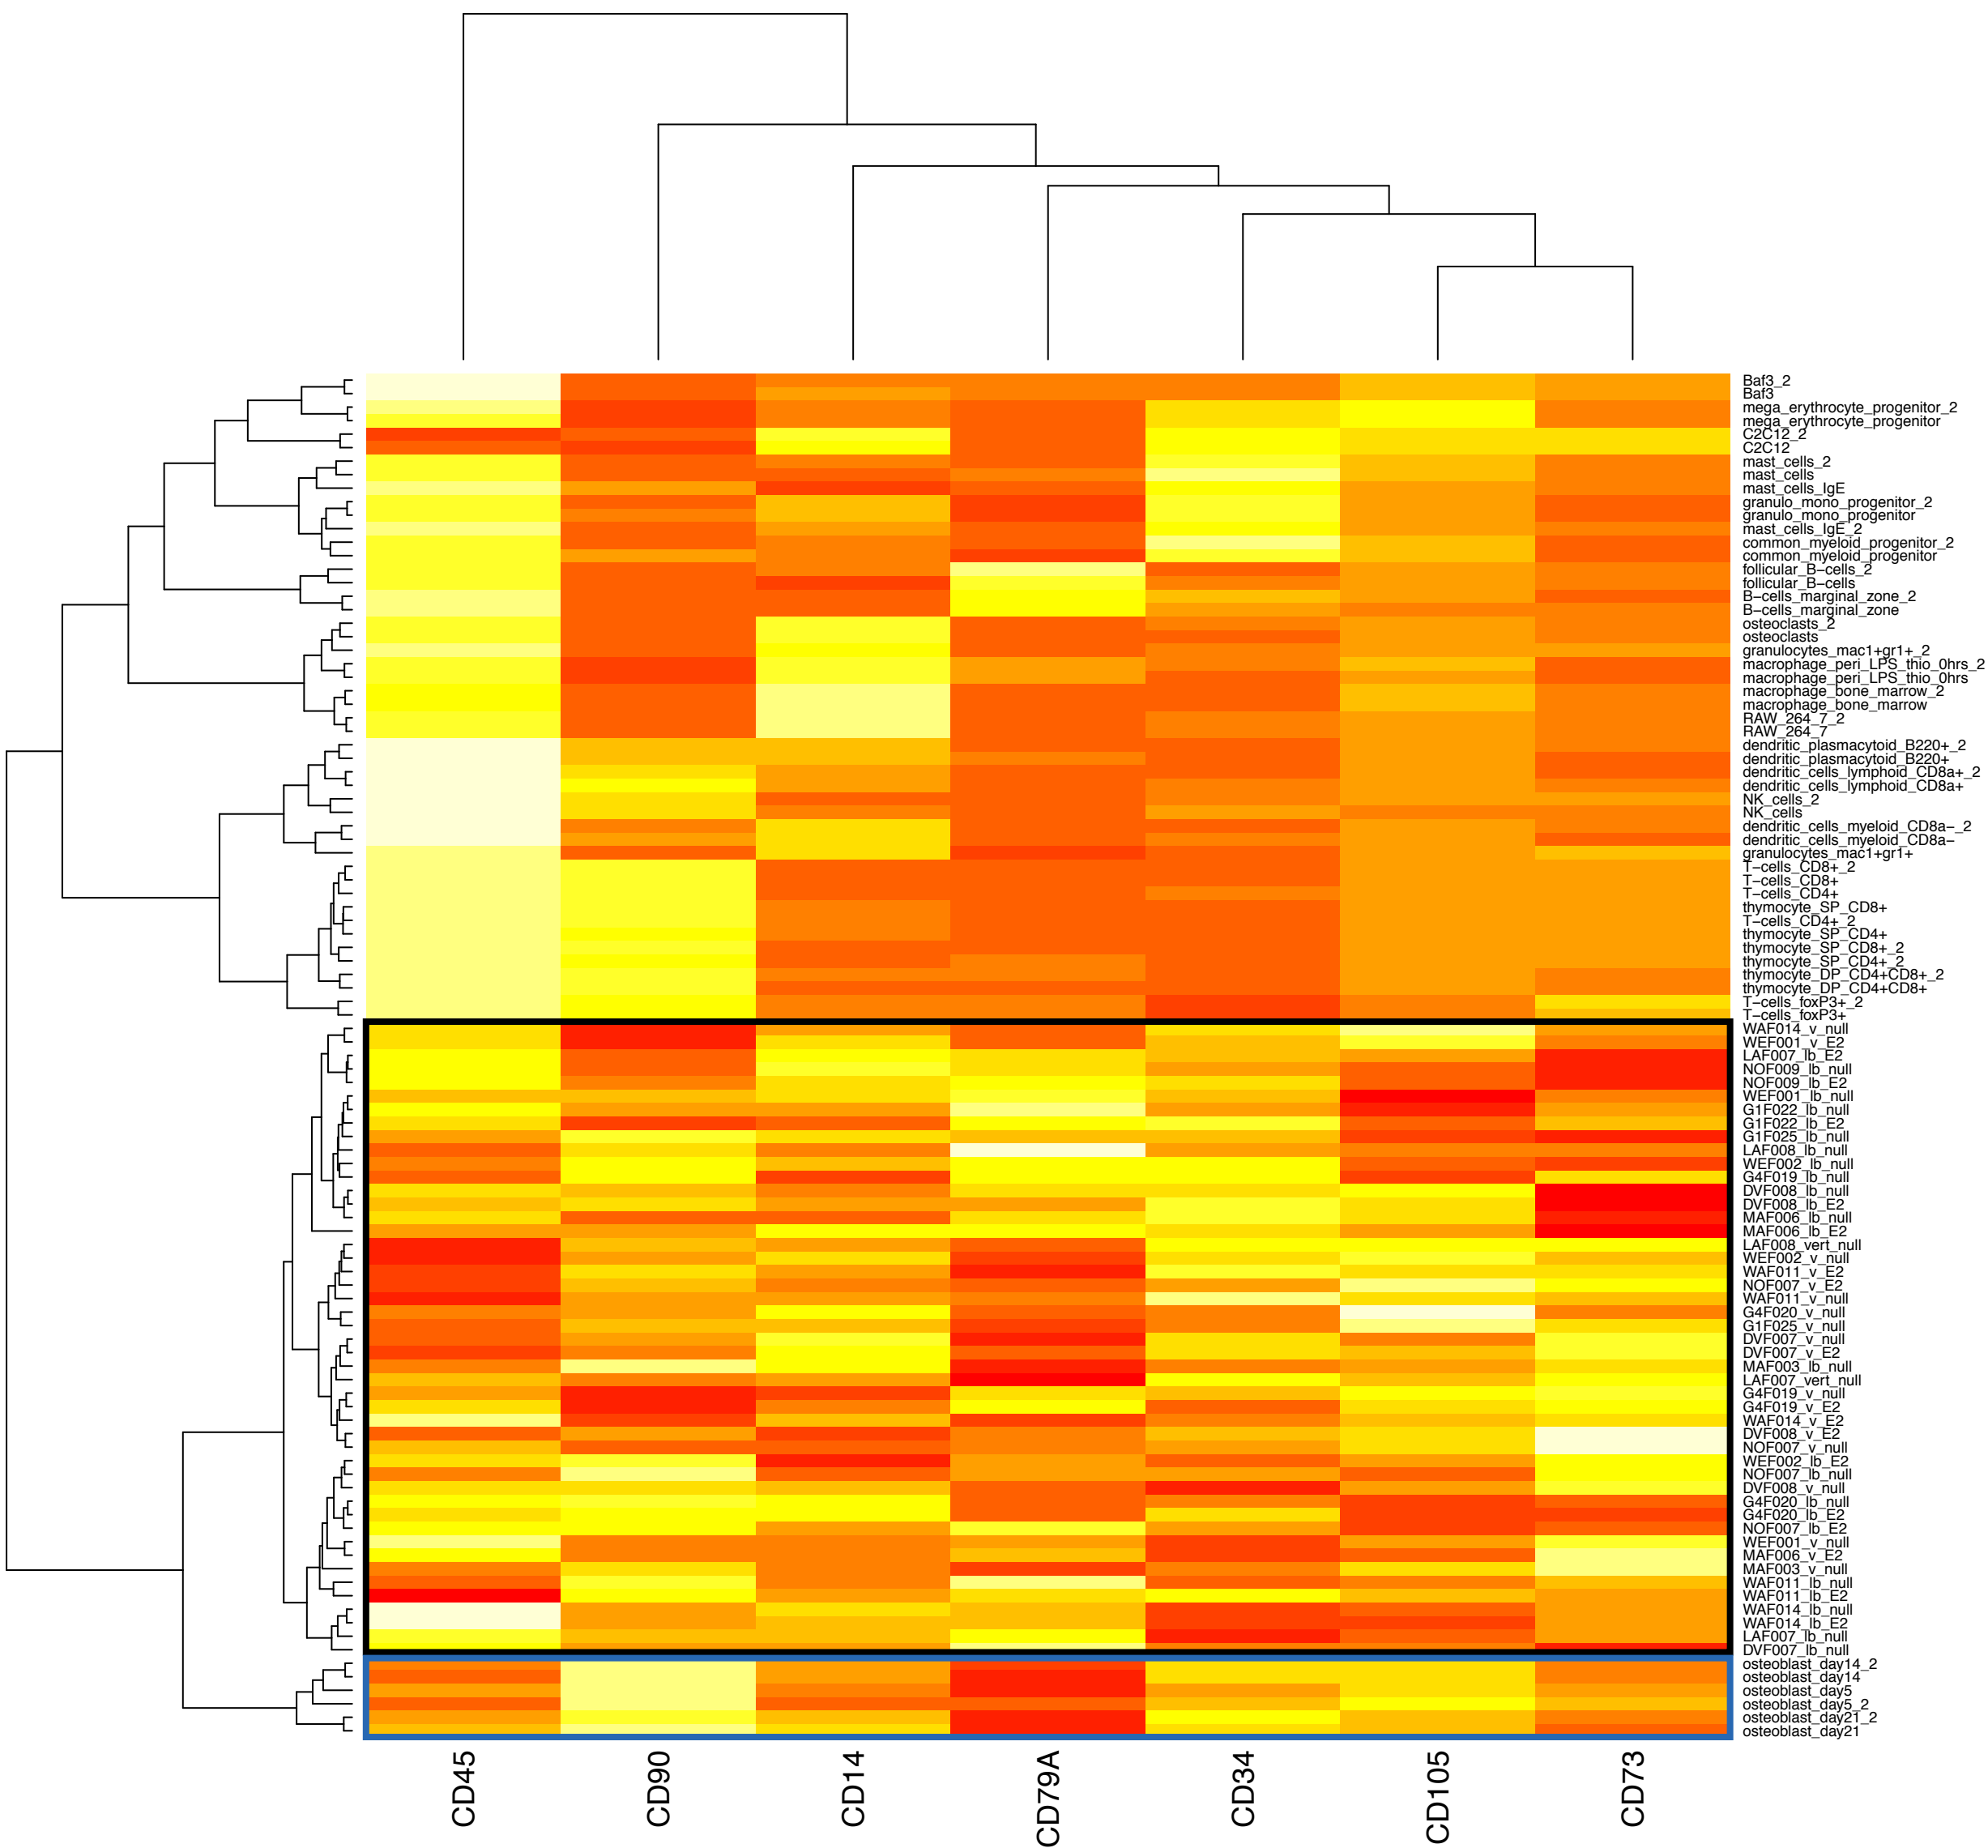

Supplement: supp [file elife-65760-supp-v1.zip]
